# Supplementary material for: A High-Density SNP Genetic Linkage Map and QTL Analysis of Growth-Related Traits in a Hybrid Family of Oysters (Crassostrea gigas × Crassostrea angulata) Using Genotyping-by-Sequencing
Source: Oxford University Press journal article supplement (doi:10.1534/g3.116.026971), 2016-05-01

# Histogram of Transformed Shell Height

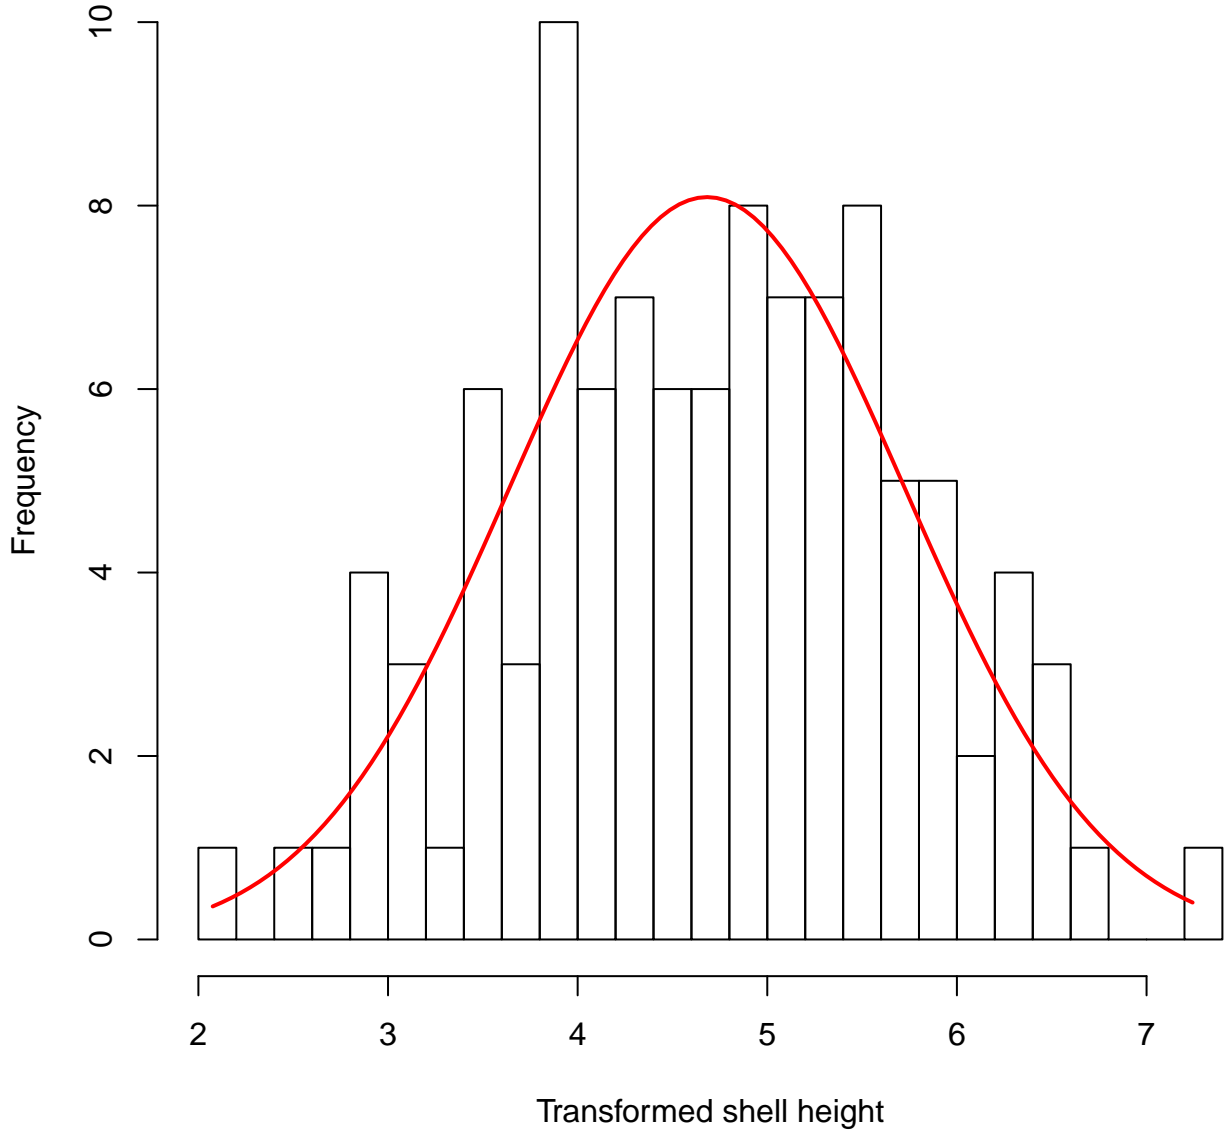

# Histogram of Shell Length

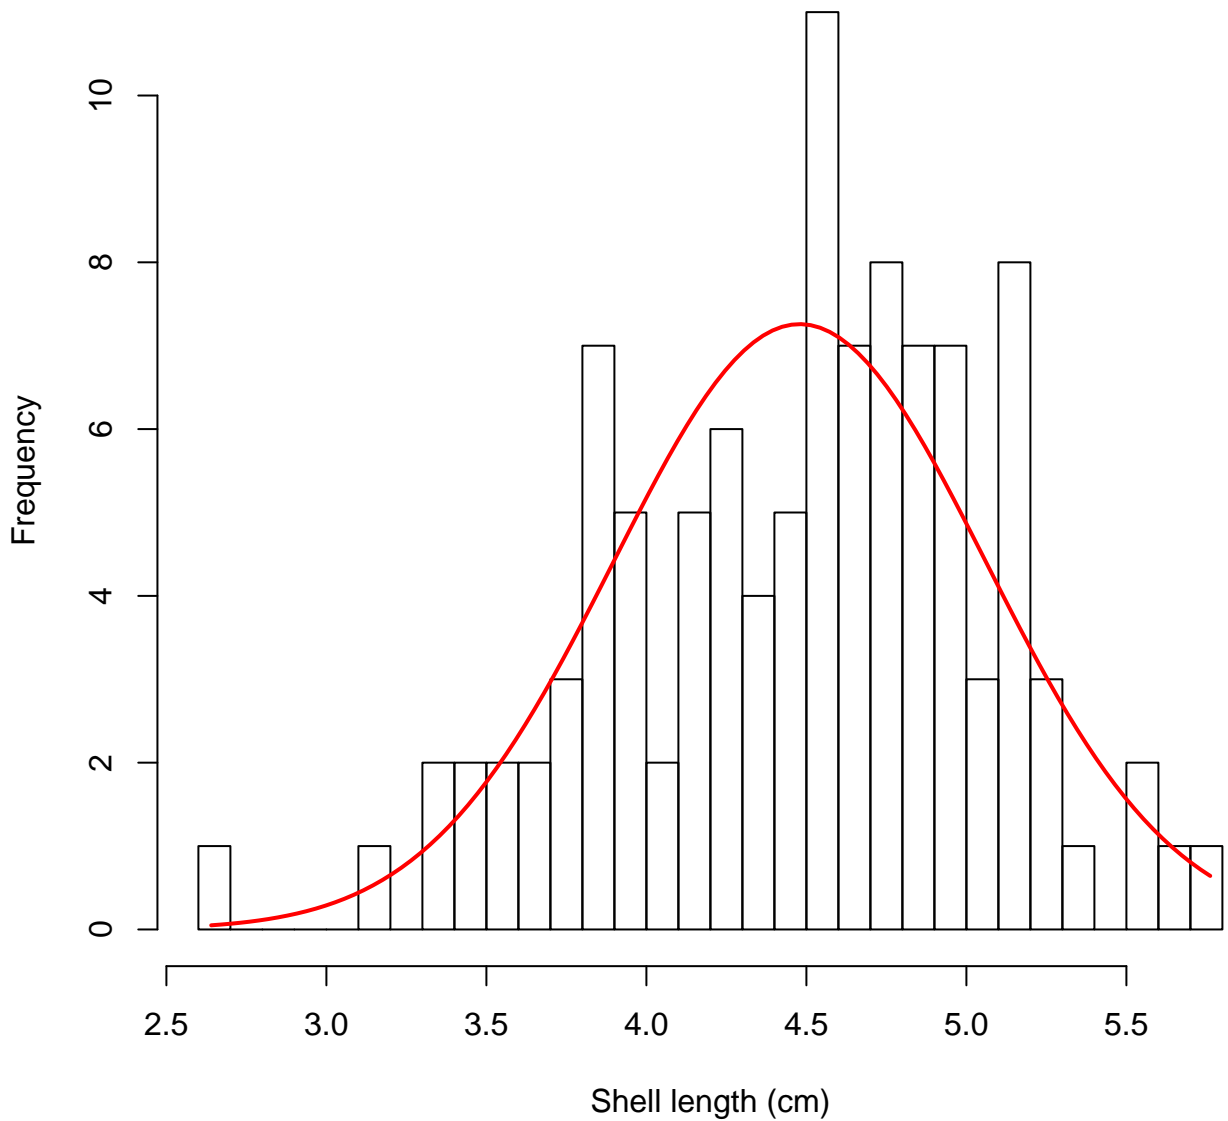

# Histogram of Shell Width

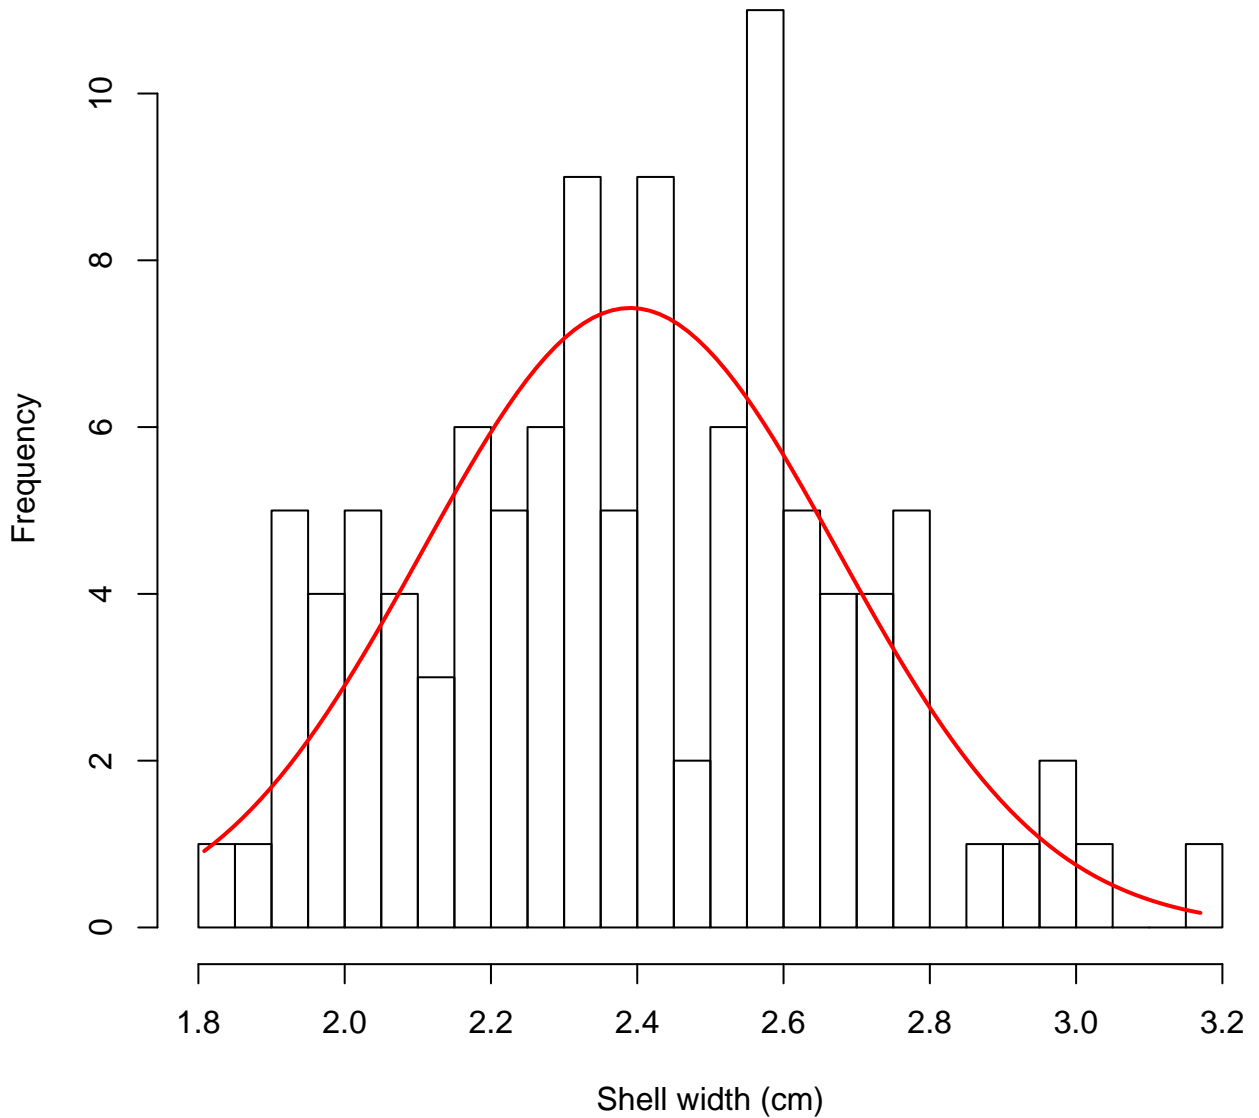

# Histogram of Mass Weight

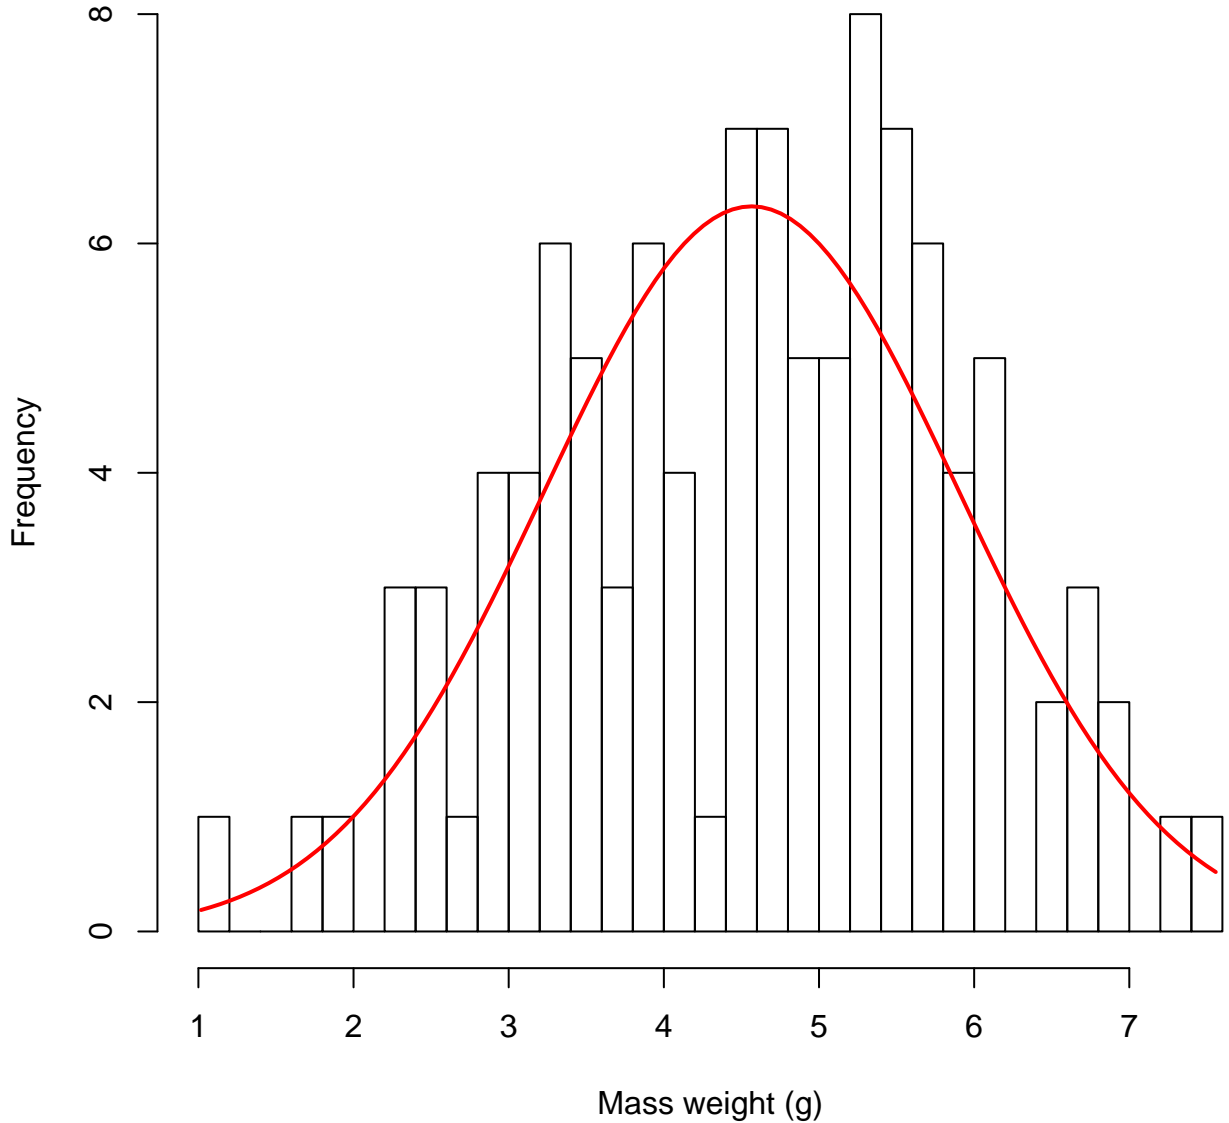

# Histogram of Soft Tissue Weight

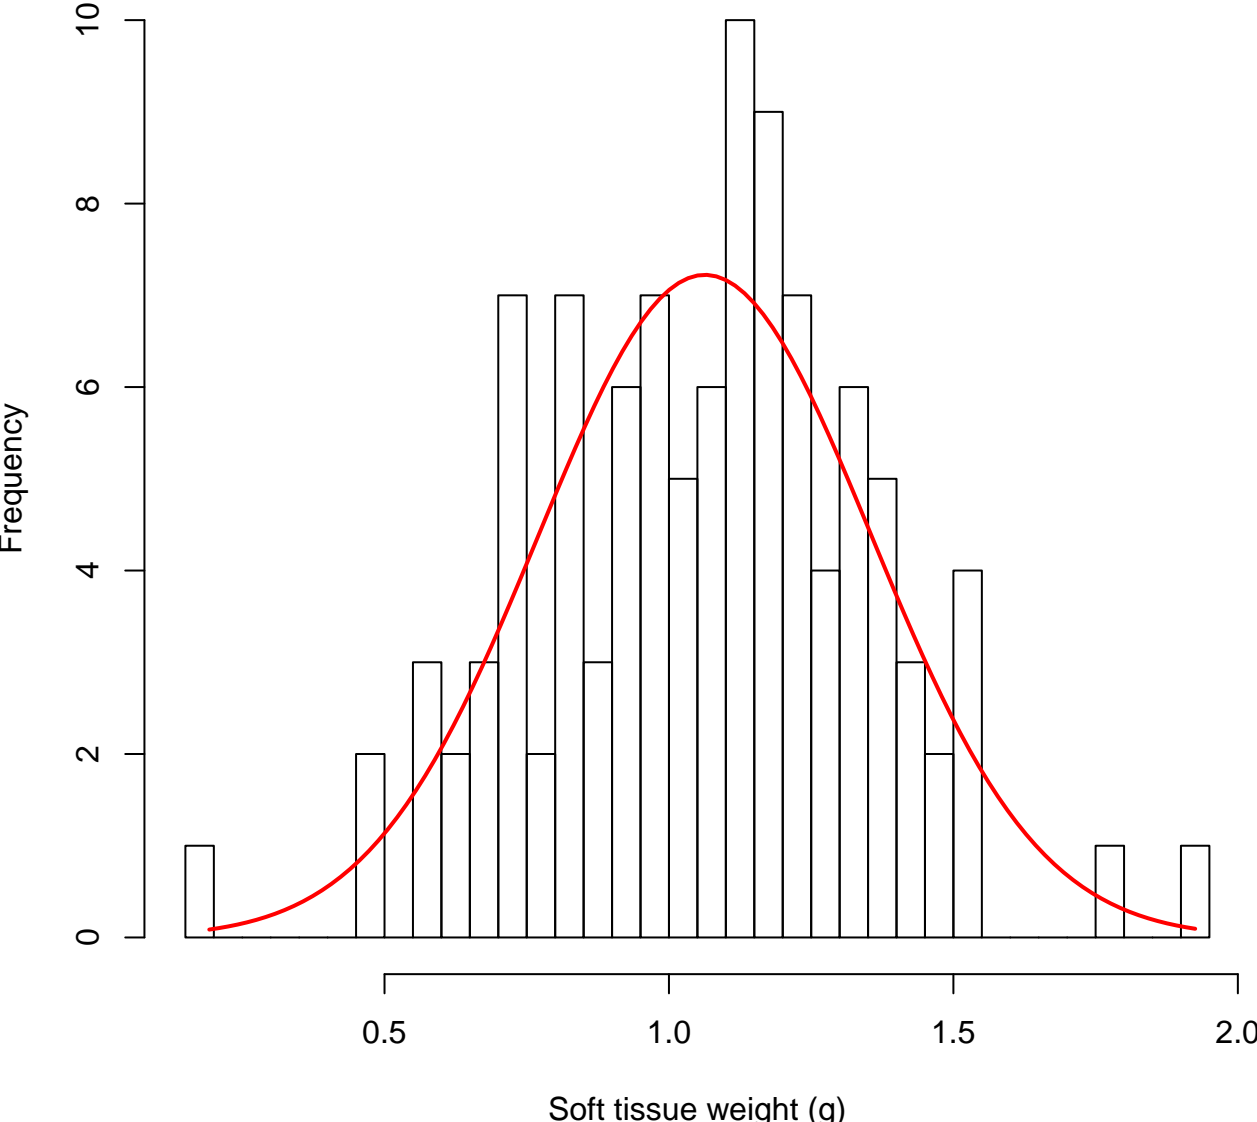

Supplement: 026971_files1.pdf [file 026971_files1.pdf]
