# Supplementary material for: A High-Density SNP Genetic Linkage Map and QTL Analysis of Growth-Related Traits in a Hybrid Family of Oysters (Crassostrea gigas × Crassostrea angulata) Using Genotyping-by-Sequencing
Source: Oxford University Press journal article supplement (doi:10.1534/g3.116.026971), 2016-05-01

# Comparison of Shell Height Between Female and Male Progeny

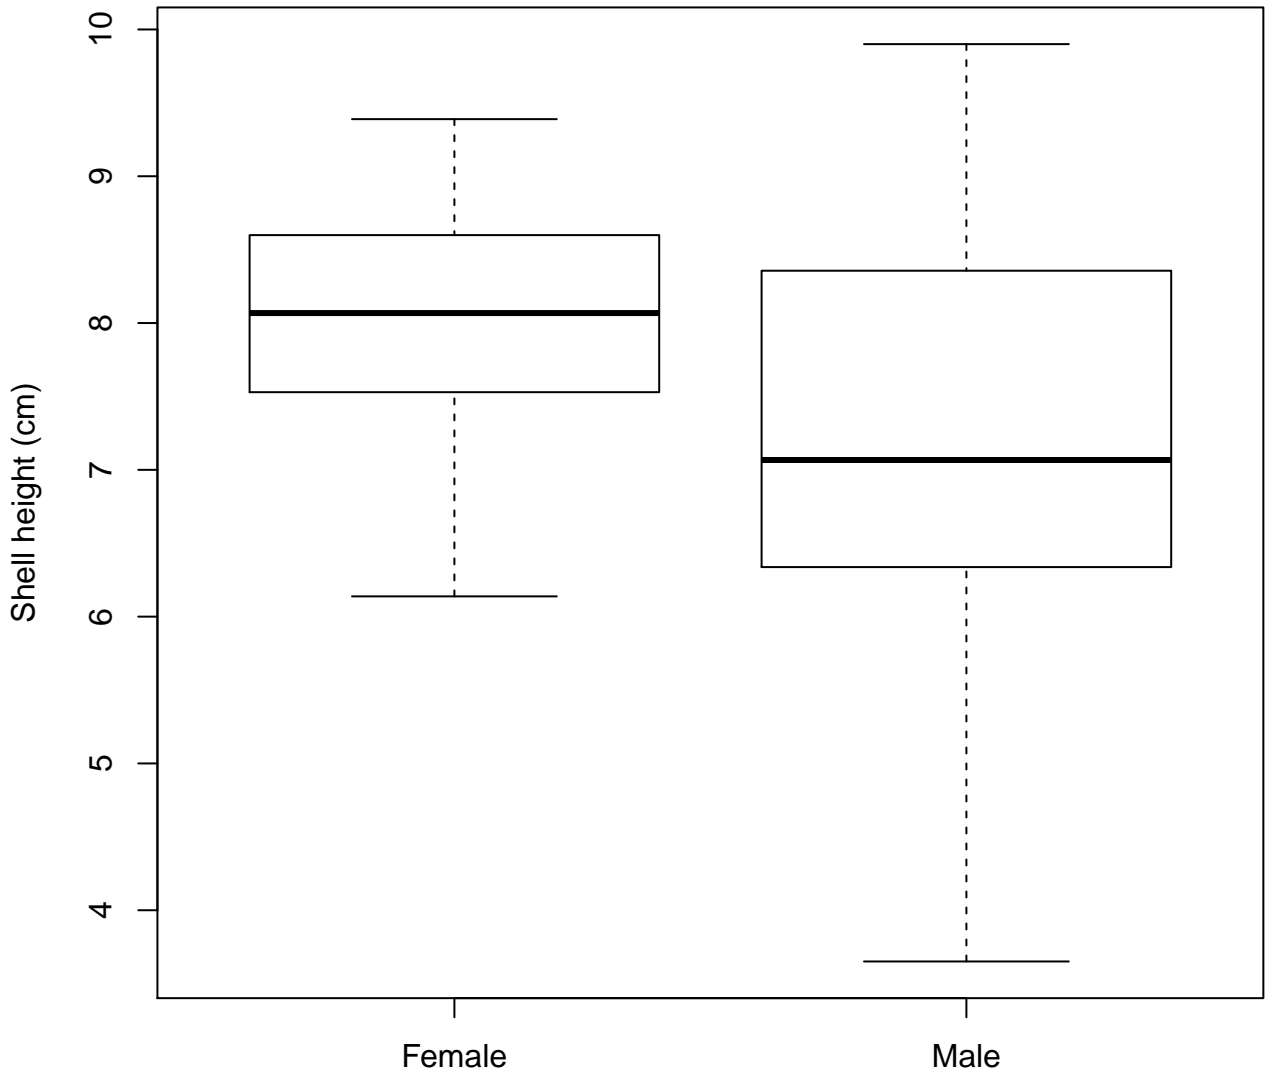

# Comparison of Shell Length Between Female and Male Progeny

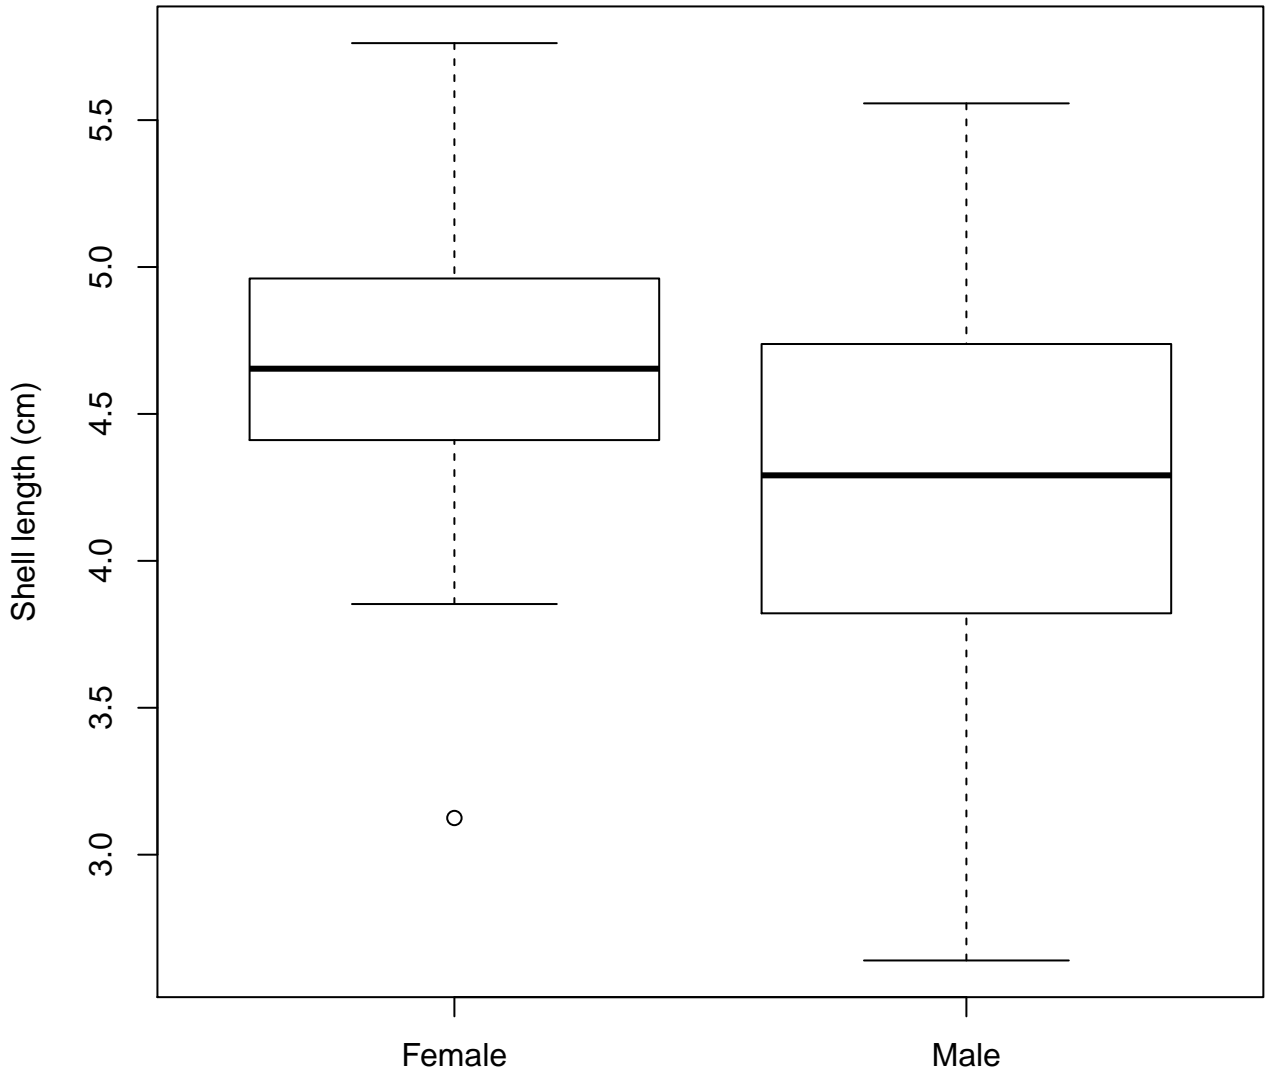

# Comparison of Shell Width Between Female and Male Progeny

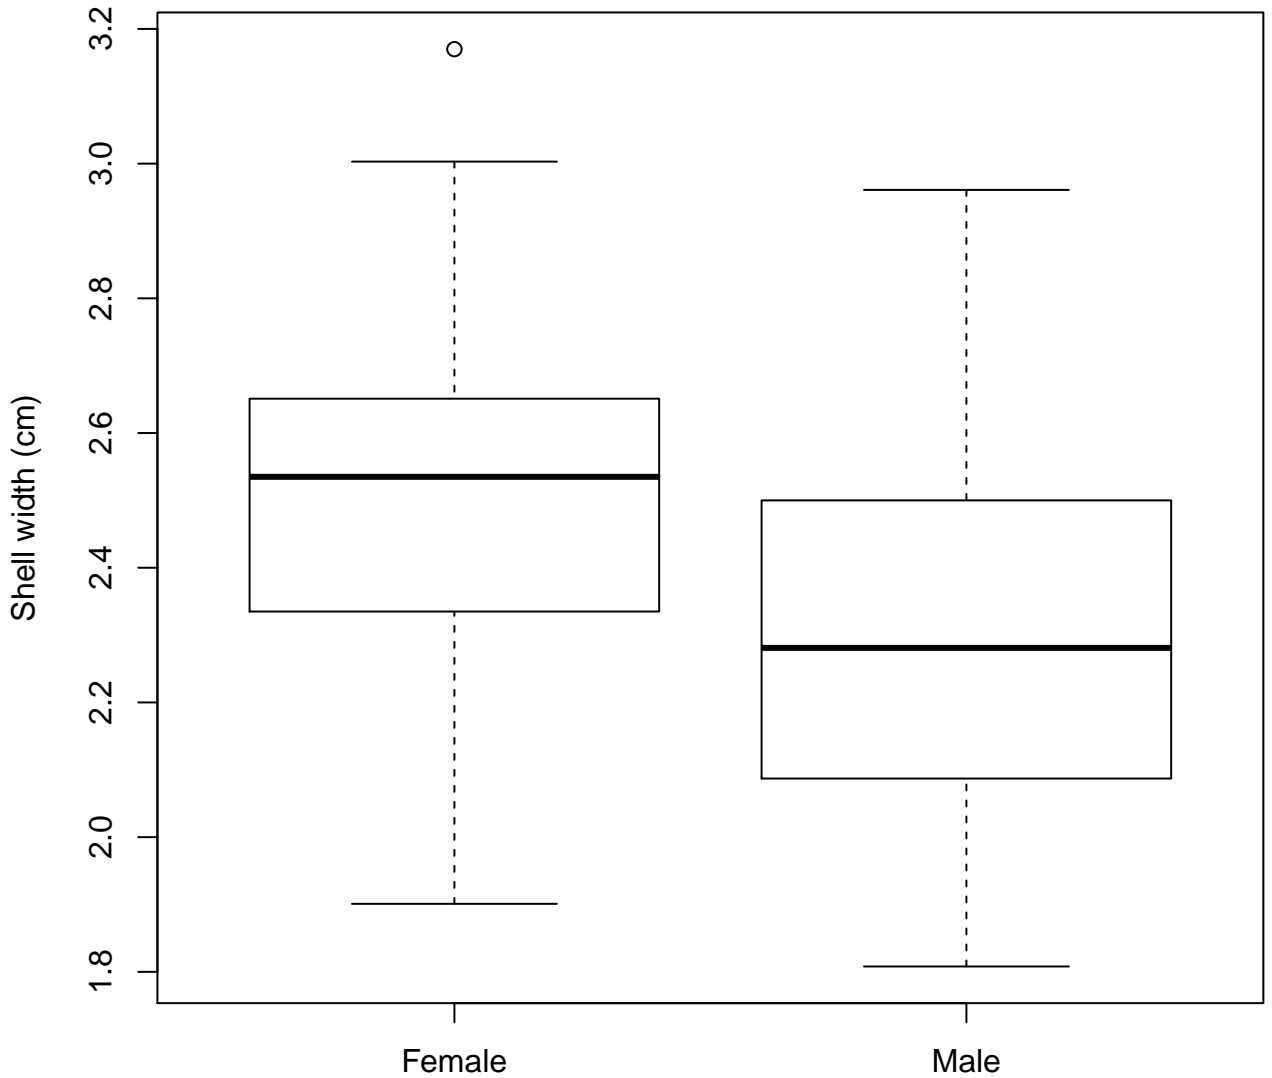

# Comparison of Mass Weight Between Female and Male Progeny

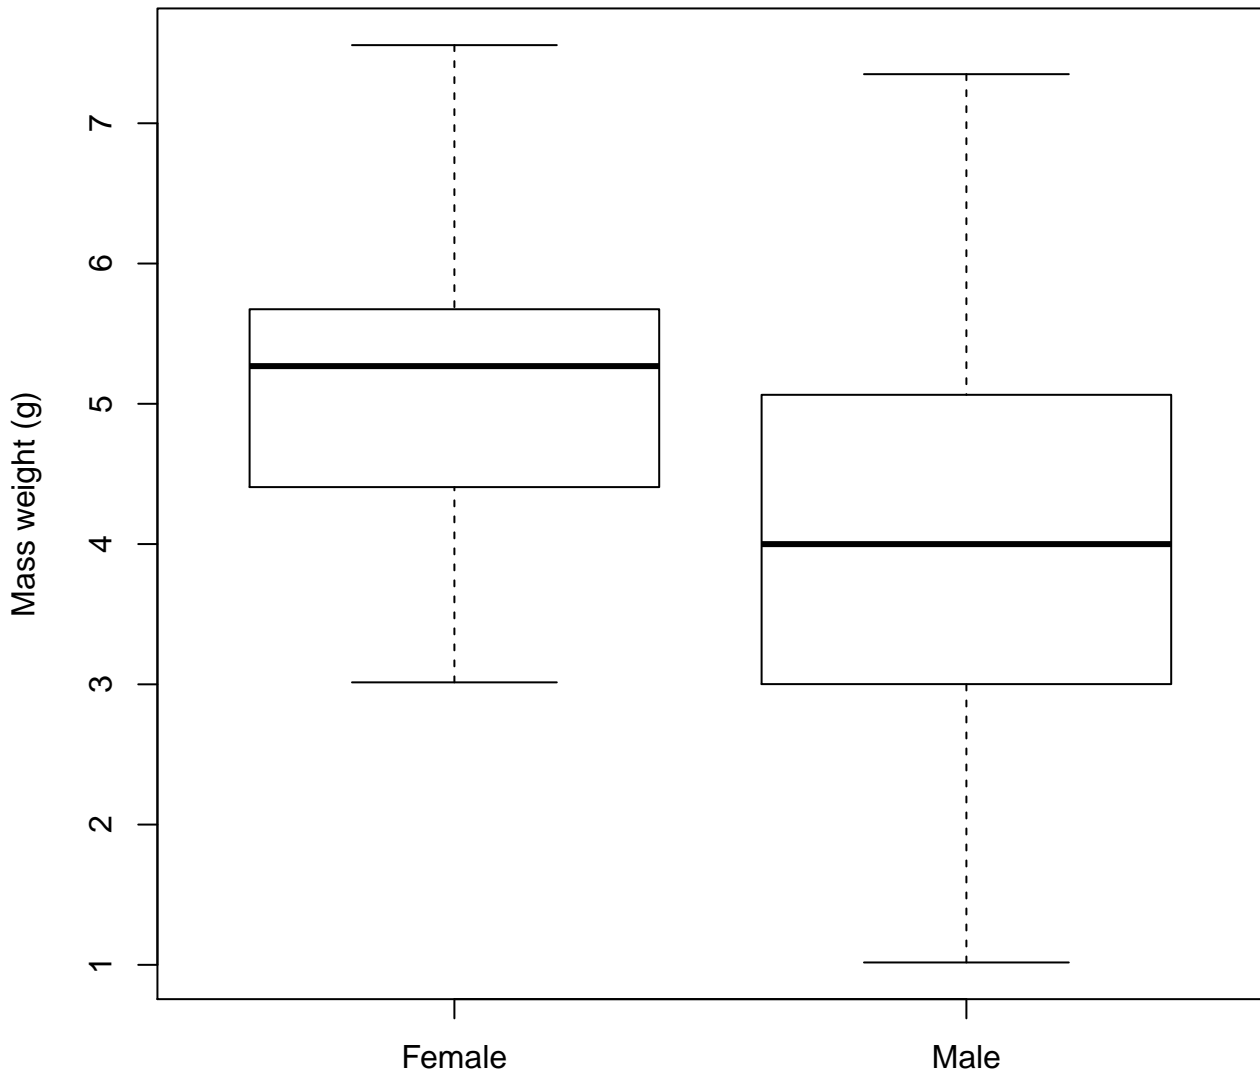

# Comparison of Soft Tissue Weight Between Female and Male Progeny

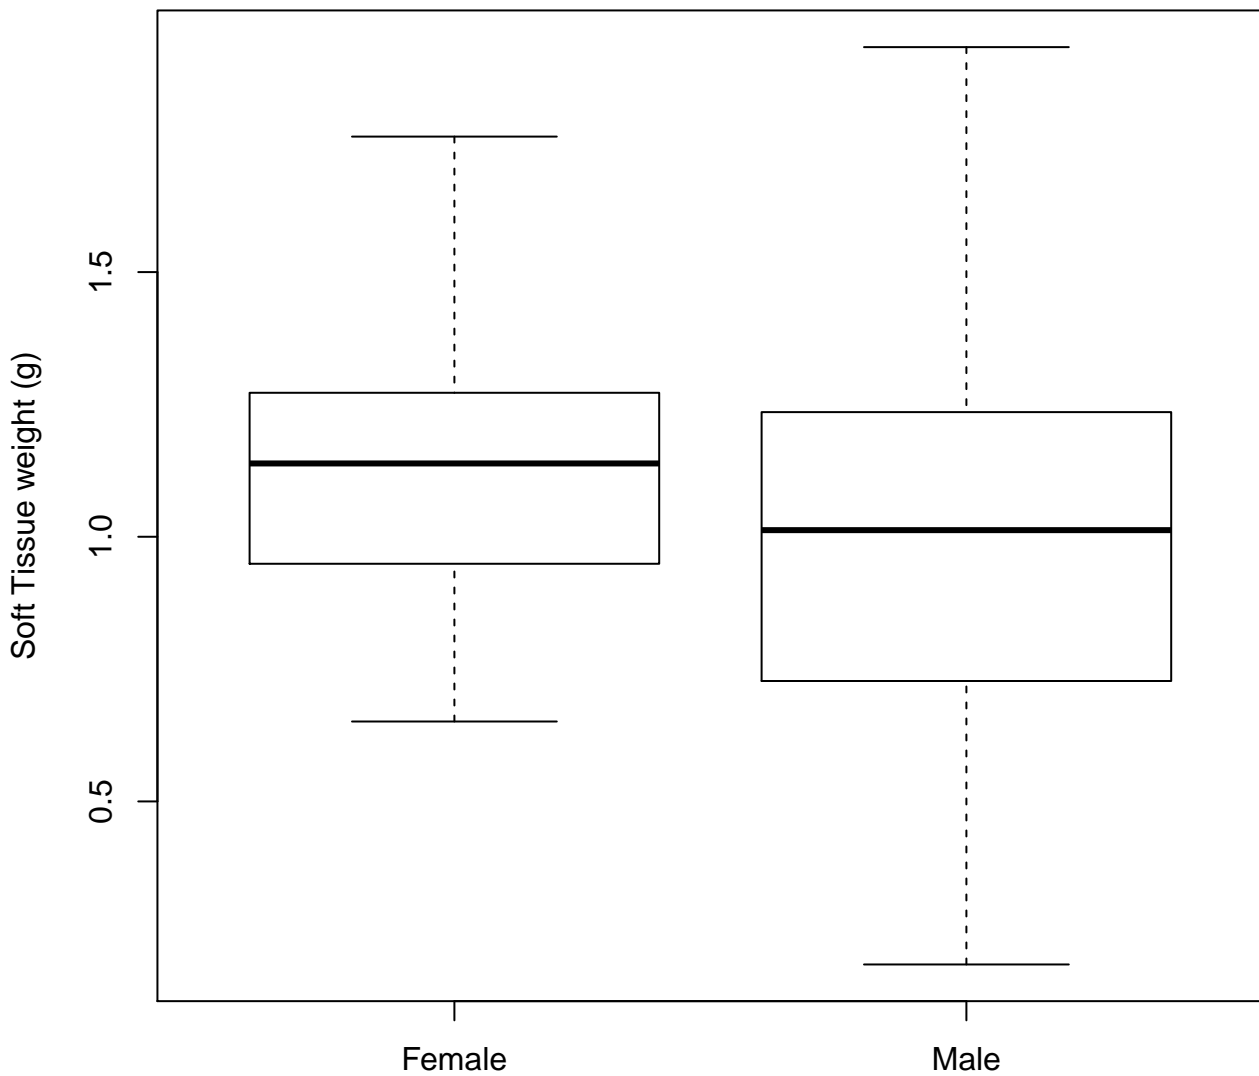

Supplement: 026971_files2.pdf [file 026971_files2.pdf]
