# Supplementary material for: A High-Density SNP Genetic Linkage Map and QTL Analysis of Growth-Related Traits in a Hybrid Family of Oysters (Crassostrea gigas × Crassostrea angulata) Using Genotyping-by-Sequencing
Source: Oxford University Press journal article supplement (doi:10.1534/g3.116.026971), 2016-05-01
Supplement: 026971_files3.pdf [file 026971_files3.pdf]

LG A1

|        |                         |
|--------|-------------------------|
| 0.00   | Marker25095             |
| 1.23   | Marker40833             |
| 6.72   | Marker29791             |
| 10.68  | Marker29802             |
| 12.44  | Marker11710             |
| 12.81  | Marker22501             |
| 13.36  | Marker13557             |
| 14.38  | Marker33266             |
| 15.37  | Marker7253              |
| 16.37  | Marker17665             |
| 17.22  | Marker7231              |
| 17.46  | Marker13839             |
| 18.65  | Marker5715              |
| 19.28  | Marker22504             |
| 19.79  | Marker33852             |
| 20.73  | Marker10830             |
| 21.65  | Marker9591              |
| 22.20  | Marker5731              |
| 22.85  | Marker7222              |
| 23.56  | Marker40834             |
| 24.20  | Marker10430             |
| 24.71  | Marker18603             |
| 25.42  | Marker33280             |
| 25.66  | Marker16945             |
| 26.71  | Marker907               |
| 27.76  | Marker41507             |
| 28.01  | Marker18608             |
| 28.63  | Marker41508             |
| 29.75  | Marker19157             |
| 30.59  | Marker30635 Marker49056 |
| 33.80  | Marker27209             |
| 35.46  | Marker11231             |
| 36.32  | Marker34911             |
| 38.26  | Marker34909             |
| 38.39  | Marker33942             |
| 38.82  | Marker23174             |
| 39.43  | Marker36408             |
| 40.32  | Marker11324             |
| 40.70  | Marker30525             |
| 41.14  | Marker33560             |
| 41.44  | Marker30071             |
| 42.80  | Marker13357             |
| 43.27  | Marker1589              |
| 43.86  | Marker34616             |
| 44.35  | Marker34614             |
| 44.45  | Marker30552             |
| 45.24  | Marker33148             |
| 45.32  | Marker36394             |
| 46.51  | Marker17544             |
| 46.76  | Marker32491             |
| 46.98  | Marker6155              |
| 47.28  | Marker28342             |
| 48.00  | Marker37192             |
| 48.35  | Marker19337             |
| 48.70  | Marker30513             |
| 49.04  | Marker48187             |
| 49.24  | Marker30558             |
| 49.42  | Marker30594             |
| 49.72  | Marker16328             |
| 50.07  | Marker16336             |
| 50.28  | Marker61915             |
| 50.40  | Marker22170             |
| 50.52  | Marker6186 Marker31690  |
| 50.87  | Marker36395             |
| 51.25  | Marker6161              |
| 51.54  | Marker34613             |
| 51.89  | Marker33142 Marker33141 |
| 52.18  | Marker3864              |
| 53.39  | Marker32514             |
| 53.66  | Marker18547             |
| 54.37  | Marker30522             |
| 55.62  | Marker41540             |
| 57.35  | Marker9096              |
| 58.52  | Marker35312             |
| 58.91  | Marker41535             |
| 59.50  | Marker11594             |
| 59.78  | Marker6223              |
| 60.71  | Marker3721 Marker32188  |
| 61.54  | Marker35322             |
| 61.67  | Marker17766             |
| 61.78  | Marker29570             |
| 62.09  | Marker28690             |
| 62.62  | Marker6736              |
| 62.64  | Marker18957             |
| 63.23  | Marker3990              |
| 64.41  | Marker15291             |
| 64.51  | Marker41538             |
| 64.78  | Marker18692             |
| 65.18  | Marker9859              |
| 65.74  | Marker9838              |
| 67.51  | Marker50812 Marker47016 |
|        | Marker49385 Marker49639 |
| 70.06  | Marker392               |
| 71.26  | Marker10740             |
| 71.92  | Marker43898             |
| 72.45  | Marker6154              |
| 73.48  | Marker10651             |
| 73.61  | Marker6978              |
| 75.59  | Marker6311              |
| 77.03  | Marker24448             |
| 80.25  | Marker34627             |
| 81.08  | Marker34416             |
| 81.49  | Marker40341             |
| 82.12  | Marker33151             |
| 83.66  | Marker37727             |
| 83.83  | Marker19149             |
| 85.03  | Marker51726             |
| 87.43  | Marker6092              |
| 88.00  | Marker16345             |
| 88.84  | Marker16514             |
| 89.02  | Marker61107             |
| 89.30  | Marker43063             |
| 90.16  | Marker17650             |
| 90.18  | Marker33764 Marker3093  |
| 90.38  | Marker31656             |
| 90.59  | Marker42339             |
| 90.89  | Marker32250             |
| 91.17  | Marker3700              |
| 91.52  | Marker10155             |
| 92.15  | Marker39292             |
| 92.84  | Marker36008             |
| 94.14  | Marker19146             |
| 94.84  | Marker35944             |
| 95.68  | Marker25342             |
| 96.00  | Marker3346              |
| 96.75  | Marker34151             |
| 96.98  | Marker35050 Marker15846 |
| 97.24  | Marker40453             |
| 97.51  | Marker40419             |
| 97.85  | Marker33655             |
| 98.27  | Marker43306             |
| 98.91  | Marker43167             |
| 99.44  | Marker16513             |
| 99.75  | Marker12971             |
| 100.06 | Marker8240              |
| 100.28 | Marker7198              |
| 100.59 | Marker18698 Marker27661 |
| 101.10 | Marker38843             |
| 101.17 | Marker3743 Marker18955  |
| 101.45 | Marker28684             |
| 101.99 | Marker15280             |
| 102.39 | Marker40454             |
| 102.60 | Marker9269              |
| 102.78 | Marker4913              |
| 103.05 | Marker4914              |
| 103.93 | Marker40482             |
| 104.05 | Marker20930             |
| 104.67 | Marker35022             |
| 104.83 | Marker763               |
| 105.40 | Marker37247             |
| 106.00 | Marker21346             |
| 106.08 | Marker35021             |
| 106.20 | Marker149               |
| 106.30 | Marker8710              |
| 106.79 | Marker35402             |
| 107.46 | Marker206               |
| 107.87 | Marker31652             |
| 108.68 | Marker20608             |
| 109.25 | Marker15843             |
| 109.94 | Marker32772             |
| 110.45 | Marker3676              |
| 112.47 | Marker43165             |
| 114.54 | Marker7194              |
| 117.08 | Marker36916             |
| 120.21 | Marker18715             |
| 124.63 | Marker18690 Marker18691 |
| 134.28 | Marker40408             |

# LG A2

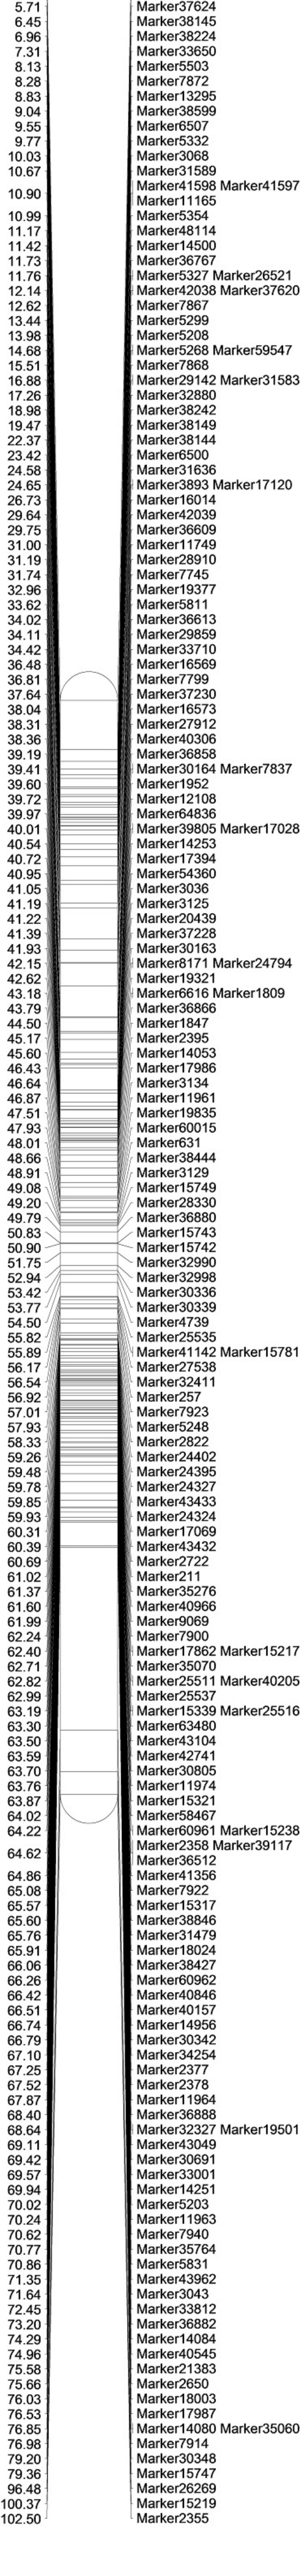

# LG A3

|        |                         |
|--------|-------------------------|
| 0.00   | Marker14835             |
| 5.75   | Marker10277             |
| 8.00   | Marker8581              |
| 9.83   | Marker16564 Marker61776 |
| 11.32  | Marker33165             |
| 12.18  | Marker50890             |
| 12.91  | Marker8584              |
| 12.91  | Marker10279             |
| 15.03  | Marker10281             |
| 16.15  | Marker14834             |
| 18.14  | Marker14031 Marker37718 |
| 18.38  | Marker37723             |
| 22.85  | Marker7412              |
| 24.19  | Marker31236             |
| 25.64  | Marker41207             |
| 26.57  | Marker40646             |
| 26.66  | Marker40656             |
| 27.56  | Marker10278             |
| 28.04  | Marker27580             |
| 28.89  | Marker10287             |
| 29.56  | Marker31249             |
| 29.65  | Marker12404             |
| 29.89  | Marker39491             |
| 30.53  | Marker16231             |
| 31.44  | Marker26138 Marker26137 |
| 32.37  | Marker37713             |
| 32.99  | Marker2748              |
| 33.28  | Marker29667             |
| 33.32  | Marker39709             |
| 33.64  | Marker27923             |
| 33.77  | Marker40632             |
| 34.01  | Marker25226             |
| 34.29  | Marker12405             |
| 34.63  | Marker28060 Marker40613 |
| 34.66  | Marker32747             |
| 34.71  | Marker1452              |
| 34.95  | Marker33172             |
| 35.38  | Marker16559             |
| 35.82  | Marker8580              |
| 36.02  | Marker10276             |
| 36.87  | Marker40955             |
| 37.92  | Marker44181             |
| 39.01  | Marker62817             |
| 39.46  | Marker27301             |
| 39.96  | Marker38301             |
| 40.49  | Marker11928             |
| 40.77  | Marker42973             |
| 41.05  | Marker36747 Marker11758 |
| 41.54  | Marker11988             |
| 41.68  | Marker27930             |
| 41.72  | Marker37007             |
| 42.30  | Marker36748             |
| 42.70  | Marker11996             |
| 42.96  | Marker27709             |
| 43.07  | Marker43902             |
| 43.29  | Marker23745             |
| 44.22  | Marker10780             |
| 44.45  | Marker11756             |
| 44.48  | Marker9853              |
| 44.83  | Marker22731             |
| 45.03  | Marker36983             |
| 45.73  | Marker22718             |
| 45.77  | Marker21304             |
| 46.14  | Marker44185             |
| 46.36  | Marker57406             |
| 46.73  | Marker55177             |
| 47.41  | Marker10783             |
| 47.88  | Marker30290             |
| 48.38  | Marker18274             |
| 48.51  | Marker38022             |
| 48.82  | Marker19926             |
| 49.07  | Marker18776             |
| 49.56  | Marker44323             |
| 49.69  | Marker28211             |
| 50.19  | Marker25939             |
| 50.25  | Marker23405             |
| 50.34  | Marker19262             |
| 50.59  | Marker244               |
| 51.32  | Marker19991             |
| 52.19  | Marker38548             |
| 52.41  | Marker29321             |
| 52.86  | Marker23774             |
| 53.04  | Marker34358             |
| 53.77  | Marker36878             |
| 54.57  | Marker37169             |
| 56.30  | Marker18706             |
| 57.12  | Marker24364             |
| 57.93  | Marker36081             |
| 58.30  | Marker3682              |
| 58.83  | Marker37157 Marker19697 |
| 59.67  | Marker28828             |
| 60.14  | Marker12828             |
| 60.19  | Marker29505             |
| 60.47  | Marker48637 Marker37343 |
| 60.97  | Marker25959             |
| 61.16  | Marker21815 Marker53000 |
| 61.61  | Marker24565 Marker11127 |
| 62.40  | Marker43137 Marker4296  |
|        | Marker54444 Marker56892 |
| 63.14  | Marker34360 Marker20078 |
|        | Marker21496             |
| 64.71  | Marker16429             |
| 65.96  | Marker8423              |
| 66.86  | Marker34973             |
| 68.97  | Marker34975             |
| 69.23  | Marker44493             |
| 70.32  | Marker7956              |
| 73.26  | Marker38453             |
| 74.05  | Marker57048             |
| 74.66  | Marker8425              |
| 75.75  | Marker27434             |
| 78.95  | Marker11659             |
| 80.31  | Marker23126             |
| 81.19  | Marker32139 Marker32132 |
| 83.44  | Marker23127             |
| 85.02  | Marker31461             |
| 86.68  | Marker35320             |
| 88.05  | Marker18616             |
| 88.62  | Marker36094             |
| 89.42  | Marker27249             |
| 90.60  | Marker1135              |
| 91.38  | Marker17242             |
| 92.07  | Marker38456             |
| 92.78  | Marker35695             |
| 93.60  | Marker35709 Marker35155 |
| 94.67  | Marker16994 Marker14634 |
| 96.21  | Marker39281             |
| 96.61  | Marker43093             |
| 97.83  | Marker40984             |
| 98.63  | Marker33687             |
| 99.83  | Marker2067              |
| 100.08 | Marker8595              |
| 102.69 | Marker34735             |
| 104.03 | Marker35321             |
| 104.95 | Marker3057 Marker37197  |
| 111.01 | Marker21395             |

# LG A4

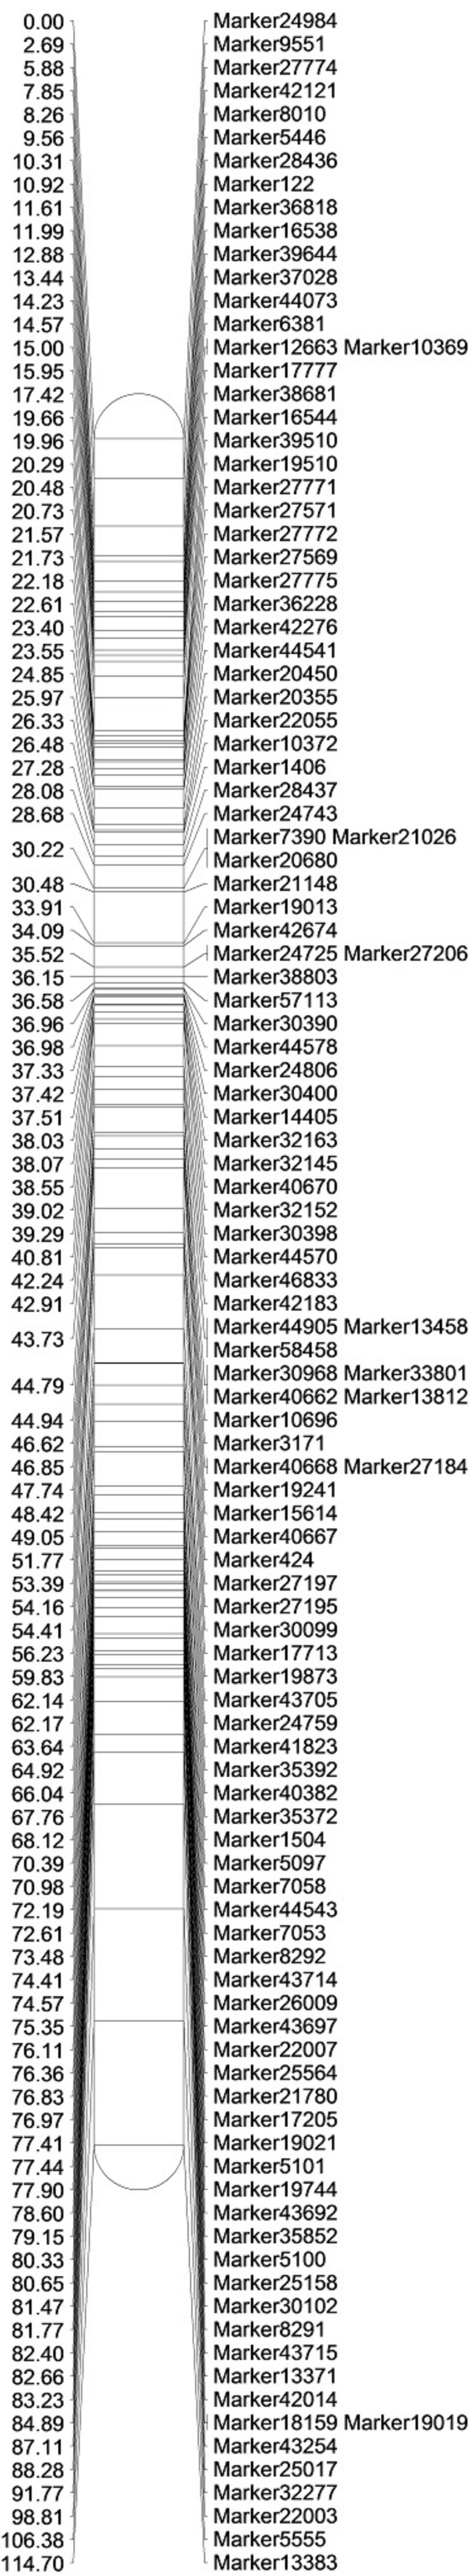

# LG A5

|       |             |             |
|-------|-------------|-------------|
| 0.00  | Marker41244 |             |
| 1.67  | Marker18525 |             |
| 4.28  | Marker33767 |             |
| 7.30  | Marker43980 |             |
| 12.97 | Marker18836 |             |
| 14.62 | Marker21429 |             |
| 14.71 | Marker37065 |             |
| 15.88 | Marker13729 |             |
| 16.86 | Marker22957 |             |
| 17.93 | Marker13904 |             |
| 18.04 | Marker33045 |             |
| 20.14 | Marker29089 |             |
| 20.82 | Marker24662 |             |
| 22.29 | Marker1820  |             |
| 23.37 | Marker39423 |             |
| 24.51 | Marker9558  |             |
| 25.45 | Marker9607  |             |
| 26.35 | Marker29813 |             |
| 27.04 | Marker44601 |             |
| 28.12 | Marker36642 |             |
| 28.75 | Marker36045 |             |
| 29.13 | Marker34961 | Marker41873 |
| 29.23 | Marker18914 |             |
| 29.45 | Marker43975 |             |
| 29.56 | Marker39609 |             |
| 29.69 | Marker19208 |             |
| 30.42 | Marker4421  |             |
| 31.31 | Marker13855 |             |
| 31.52 | Marker30371 |             |
| 32.16 | Marker12570 |             |
| 32.43 | Marker43580 |             |
| 33.02 | Marker27852 |             |
| 33.21 | Marker21856 |             |
| 33.99 | Marker37354 |             |
| 34.45 | Marker4435  |             |
| 35.04 | Marker14494 | Marker5778  |
| 35.42 | Marker19206 |             |
| 35.80 | Marker17037 |             |
| 36.39 | Marker34970 |             |
| 38.29 | Marker13851 |             |
| 39.55 | Marker36073 |             |
| 40.18 | Marker9602  |             |
| 40.25 | Marker27867 |             |
| 41.06 | Marker15062 |             |
| 41.67 | Marker34727 |             |
| 41.95 | Marker1645  |             |
| 42.07 | Marker60445 |             |
| 43.21 | Marker20720 |             |
| 43.48 | Marker40711 |             |
| 46.24 | Marker29019 |             |
| 47.91 | Marker11032 |             |
| 48.24 | Marker33854 |             |
| 50.16 | Marker19304 | Marker14936 |
| 50.42 | Marker64389 |             |
| 51.61 | Marker51923 |             |
| 51.68 | Marker36783 |             |
| 52.20 | Marker21673 |             |
| 52.56 | Marker36112 |             |
| 53.24 | Marker2535  |             |
| 54.36 | Marker51420 |             |
| 54.71 | Marker12859 |             |
| 55.22 | Marker12071 |             |
| 55.39 | Marker35732 |             |
| 56.00 | Marker22446 |             |
| 56.91 | Marker33315 |             |
| 58.21 | Marker27336 | Marker12068 |
| 58.76 | Marker2004  |             |
| 59.76 | Marker12045 |             |
| 60.09 | Marker12070 |             |
| 60.53 | Marker12021 |             |
| 60.75 | Marker1169  |             |
| 61.12 | Marker37876 |             |
| 61.28 | Marker12037 |             |
| 61.77 | Marker63076 |             |
| 62.35 | Marker5653  |             |
| 62.89 | Marker34729 |             |
| 62.92 | Marker12970 |             |
| 63.18 | Marker14196 |             |
| 63.67 | Marker51781 | Marker47080 |
| 64.26 | Marker13183 | Marker38256 |
| 64.27 | Marker28885 |             |
| 64.95 | Marker22344 | Marker40527 |
| 65.71 | Marker22329 |             |
| 66.47 | Marker25205 |             |
| 66.62 | Marker37319 |             |
| 67.01 | Marker64524 |             |
| 67.80 | Marker41890 |             |
| 68.45 | Marker45911 |             |
| 68.72 | Marker19345 | Marker46451 |
| 68.92 | Marker49357 |             |
| 69.27 | Marker28887 |             |
| 69.61 | Marker34707 |             |
| 70.21 | Marker9711  |             |
| 70.74 | Marker23499 |             |
| 71.85 | Marker38934 |             |
| 72.53 | Marker36324 |             |
| 73.04 | Marker3102  |             |
| 73.46 | Marker3732  |             |
| 73.64 | Marker2696  |             |
| 74.23 | Marker37322 |             |
| 74.81 | Marker17899 |             |
| 75.63 | Marker908   |             |
| 75.90 | Marker24513 | Marker30014 |
| 76.07 | Marker30034 |             |
| 76.20 | Marker30037 |             |
| 76.77 | Marker913   |             |
| 76.80 | Marker36314 |             |
| 76.97 | Marker36315 |             |
| 77.54 | Marker38268 |             |
| 78.22 | Marker13022 |             |
| 78.45 | Marker19439 |             |
| 79.08 | Marker13749 | Marker2687  |
| 80.18 | Marker14120 |             |
| 80.76 | Marker13273 | Marker37257 |
| 82.70 | Marker14975 | Marker16709 |
| 83.86 | Marker36325 |             |
| 84.39 | Marker21334 |             |
| 84.62 | Marker14353 |             |
| 85.19 | Marker5143  |             |
| 85.73 | Marker14344 | Marker8164  |
| 86.17 | Marker19150 |             |
| 87.45 | Marker13760 | Marker64630 |
| 87.69 | Marker25552 |             |
| 88.87 | Marker10748 | Marker5144  |
| 89.53 | Marker10707 |             |
| 93.96 | Marker43494 |             |
| 97.88 | Marker43500 |             |
|       | Marker10711 |             |

# LG A6

|        |                         |
|--------|-------------------------|
| 0.00   | Marker9196              |
| 0.77   | Marker23313             |
| 1.10   | Marker32933             |
| 1.93   | Marker35598             |
| 2.47   | Marker26061             |
| 4.33   | Marker37428             |
| 6.83   | Marker1385              |
| 8.13   | Marker25658             |
| 10.08  | Marker1196              |
| 11.12  | Marker11028             |
| 13.27  | Marker17838             |
| 14.99  | Marker21531             |
| 15.28  | Marker14237             |
| 18.42  | Marker25197 Marker14918 |
| 19.94  | Marker15925             |
| 20.43  | Marker8981              |
| 20.70  | Marker16697             |
| 21.92  | Marker18317             |
| 22.31  | Marker9745              |
| 23.51  | Marker9150 Marker32887  |
| 24.68  | Marker9616              |
| 25.07  | Marker9882              |
| 25.41  | Marker41086             |
| 26.11  | Marker9684              |
| 26.51  | Marker32081             |
| 26.76  | Marker1229              |
| 27.78  | Marker9076              |
| 29.46  | Marker9681              |
| 29.95  | Marker27517             |
| 30.74  | Marker42909             |
| 30.76  | Marker38815 Marker29978 |
| 31.62  | Marker43997 Marker20883 |
| 32.83  | Marker40277             |
| 33.25  | Marker2097 Marker17756  |
| 33.67  | Marker43353             |
| 34.71  | Marker17947             |
| 35.29  | Marker29271             |
| 37.52  | Marker29969 Marker29968 |
| 39.53  | Marker3993              |
| 41.22  | Marker11105             |
| 42.88  | Marker29967             |
| 44.59  | Marker17704 Marker9174  |
| 45.88  | Marker9159              |
| 46.34  | Marker10629             |
| 47.11  | Marker10627             |
| 47.91  | Marker37730             |
| 50.42  | Marker7385              |
| 51.52  | Marker23905             |
| 52.27  | Marker30445             |
| 52.44  | Marker4042              |
| 54.26  | Marker30443             |
|        | Marker2264 Marker12401  |
|        | Marker11 Marker426      |
| 54.29  | Marker18837 Marker48911 |
|        | Marker459 Marker29316   |
|        | Marker22077 Marker9130  |
| 55.73  | Marker26206             |
| 57.21  | Marker45607 Marker49543 |
| 59.61  | Marker14371             |
| 60.37  | Marker10790             |
| 61.50  | Marker48377 Marker37407 |
| 62.08  | Marker22794             |
| 62.58  | Marker16022             |
| 64.14  | Marker24049             |
| 65.56  | Marker41767             |
| 67.22  | Marker37405 Marker30721 |
|        | Marker37390             |
| 69.70  | Marker58117             |
| 69.84  | Marker30719             |
| 70.09  | Marker4826              |
| 72.16  | Marker25713 Marker61523 |
| 73.56  | Marker2124              |
| 74.58  | Marker4822              |
| 74.68  | Marker19930             |
| 74.92  | Marker26545             |
| 79.72  | Marker24639 Marker23637 |
| 80.22  | Marker32365             |
| 80.89  | Marker36719             |
| 81.86  | Marker42222             |
| 82.24  | Marker29397             |
| 83.01  | Marker41269             |
| 83.19  | Marker34246             |
| 83.32  | Marker30961             |
| 83.46  | Marker23633             |
| 83.74  | Marker16714             |
| 84.80  | Marker20668 Marker41073 |
| 85.13  | Marker1430              |
| 85.85  | Marker28123             |
| 86.28  | Marker36671 Marker23231 |
| 86.50  | Marker7064              |
| 86.85  | Marker25714             |
| 87.15  | Marker2128              |
| 87.39  | Marker17344             |
| 87.59  | Marker12291             |
| 87.85  | Marker7050              |
| 87.91  | Marker23627 Marker2127  |
| 88.08  | Marker6854 Marker40384  |
| 88.14  | Marker23015             |
| 88.32  | Marker37851             |
| 88.45  | Marker21289             |
| 88.58  | Marker16750             |
| 88.64  | Marker25718             |
| 88.91  | Marker28476 Marker13197 |
| 89.41  | Marker6855              |
| 89.60  | Marker38885             |
| 90.01  | Marker37839             |
| 90.33  | Marker7041              |
| 90.51  | Marker12293             |
| 91.43  | Marker7042              |
| 91.91  | Marker16748             |
| 92.10  | Marker37859             |
| 92.49  | Marker30774             |
| 93.12  | Marker37283             |
| 93.74  | Marker30775             |
| 94.94  | Marker7035              |
| 95.36  | Marker14539             |
| 96.13  | Marker36658             |
| 97.37  | Marker12988             |
| 98.88  | Marker59332             |
| 101.30 | Marker41222             |
| 102.41 | Marker41264             |

LG A7

|        |                         |
|--------|-------------------------|
| 0.00   | Marker42958             |
| 0.79   | Marker11157             |
| 1.39   | Marker28854             |
| 2.16   | Marker24091             |
| 2.78   | Marker37137             |
| 3.79   | Marker41322             |
| 4.13   | Marker4809              |
| 4.72   | Marker39646             |
| 5.17   | Marker6580              |
| 5.83   | Marker17384             |
| 6.36   | Marker8736              |
| 6.47   | Marker10804             |
| 6.75   | Marker14928             |
| 6.97   | Marker33892             |
| 7.35   | Marker11955             |
| 7.91   | Marker13605             |
| 8.05   | Marker33182             |
| 8.36   | Marker29365             |
| 8.81   | Marker29544             |
| 9.08   | Marker6534              |
| 9.56   | Marker39629             |
| 9.96   | Marker7976              |
| 10.17  | Marker11573             |
| 10.33  | Marker18295             |
| 10.71  | Marker38417             |
| 11.26  | Marker5531              |
| 11.49  | Marker14911             |
| 11.68  | Marker29553 Marker11579 |
| 11.88  | Marker33668             |
| 11.95  | Marker22453             |
| 12.12  | Marker39634             |
| 12.24  | Marker32169             |
| 12.38  | Marker13614             |
| 12.50  | Marker11560             |
| 12.71  | Marker29552             |
| 12.83  | Marker4004              |
| 13.09  | Marker25452             |
| 13.23  | Marker29123             |
| 13.68  | Marker31747 Marker33016 |
| 14.10  | Marker28459 Marker42754 |
| 14.73  | Marker21197             |
| 15.07  | Marker10645             |
| 15.91  | Marker24127 Marker38213 |
| 16.15  | Marker22685 Marker23678 |
| 16.44  | Marker34947             |
| 16.55  | Marker23555             |
| 16.79  | Marker6082              |
| 17.13  | Marker14313 Marker36416 |
| 18.59  | Marker17166             |
| 18.77  | Marker28445             |
| 19.18  | Marker8556              |
| 19.47  | Marker57989             |
| 19.66  | Marker18222             |
| 20.53  | Marker29546 Marker38414 |
| 20.88  | Marker52140             |
| 21.22  | Marker62557 Marker11569 |
| 21.83  | Marker30190             |
| 21.90  | Marker28737             |
| 22.34  | Marker18219             |
| 23.16  | Marker18231             |
| 23.53  | Marker49791             |
| 23.71  | Marker31139             |
| 24.37  | Marker43343             |
| 25.11  | Marker43344             |
| 25.17  | Marker41325             |
| 25.71  | Marker21178 Marker41318 |
| 28.41  | Marker13610 Marker5524  |
| 29.22  | Marker13617             |
| 30.02  | Marker28183 Marker28180 |
| 31.53  | Marker52333             |
| 33.86  | Marker32695             |
| 35.10  | Marker5669 Marker33871  |
| 37.05  | Marker36970             |
| 37.76  | Marker27316             |
| 38.14  | Marker42960             |
| 39.14  | Marker18501             |
| 40.19  | Marker44344 Marker8748  |
| 40.98  | Marker33890 Marker37141 |
| 41.99  | Marker33902             |
| 42.26  | Marker8738              |
| 45.14  | Marker2929              |
| 45.68  | Marker3558              |
| 45.94  | Marker29201             |
| 46.94  | Marker43472             |
| 47.08  | Marker17778             |
| 47.68  | Marker33691 Marker33694 |
| 48.25  | Marker23390             |
| 48.96  | Marker72                |
| 49.95  | Marker48052             |
| 50.59  | Marker36973             |
| 51.19  | Marker14113             |
| 51.33  | Marker27793             |
| 51.37  | Marker10845             |
| 51.98  | Marker26174             |
| 52.24  | Marker2935              |
| 52.76  | Marker37540             |
| 52.97  | Marker26097             |
| 53.40  | Marker2933              |
| 53.87  | Marker31965             |
| 54.01  | Marker5127              |
| 54.76  | Marker61311 Marker32696 |
| 55.14  | Marker47100 Marker39982 |
| 55.21  | Marker15423             |
| 57.48  | Marker40500             |
| 58.31  | Marker23881             |
| 59.56  | Marker13973             |
| 60.66  | Marker16678             |
| 62.85  | Marker34315             |
| 63.43  | Marker36488             |
| 64.27  | Marker36503             |
| 65.21  | Marker29090 Marker61167 |
| 65.54  | Marker11793             |
| 66.03  | Marker12438             |
| 66.06  | Marker31802             |
| 66.08  | Marker31786             |
| 66.13  | Marker31798             |
| 66.41  | Marker31790             |
| 66.71  | Marker5632              |
| 67.26  | Marker24801             |
| 67.36  | Marker39194             |
| 67.48  | Marker39524             |
| 67.92  | Marker13790             |
| 68.24  | Marker17369 Marker16806 |
| 68.47  | Marker21863             |
| 68.90  | Marker4284              |
| 69.19  | Marker12430             |
| 69.24  | Marker26962             |
| 69.61  | Marker13780             |
| 69.95  | Marker8852              |
| 70.26  | Marker36498             |
| 70.47  | Marker25409             |
| 70.80  | Marker31383             |
| 71.03  | Marker33390 Marker24156 |
| 71.40  | Marker40751             |
| 72.04  | Marker25425             |
| 72.47  | Marker40755             |
| 72.53  | Marker11625             |
| 72.68  | Marker38955             |
| 72.76  | Marker60196             |
| 73.07  | Marker25296             |
| 73.20  | Marker25802             |
| 73.27  | Marker29038             |
| 73.55  | Marker10467 Marker28785 |
| 73.93  | Marker10345             |
| 74.21  | Marker53261             |
| 74.53  | Marker614 Marker25413   |
| 74.68  | Marker36500             |
| 74.82  | Marker8854              |
| 75.09  | Marker12525             |
| 75.12  | Marker19247             |
| 75.21  | Marker19240             |
| 75.54  | Marker34343             |
| 75.62  | Marker25908             |
| 75.78  | Marker5617 Marker34483  |
| 75.90  | Marker34314 Marker12526 |
| 76.37  | Marker5614              |
| 76.38  | Marker13297 Marker36480 |
| 76.50  | Marker12313             |
| 76.85  | Marker35218             |
| 77.00  | Marker11799             |
| 77.29  | Marker25236 Marker28784 |
| 77.55  | Marker33450             |
| 77.96  | Marker26638             |
| 78.12  | Marker17707             |
| 78.36  | Marker15154             |
| 78.82  | Marker31354             |
| 79.03  | Marker18848             |
| 79.61  | Marker27679             |
| 79.98  | Marker10350             |
| 80.33  | Marker19123             |
| 80.97  | Marker2099              |
| 81.10  | Marker28194             |
| 81.93  | Marker13883             |
| 82.45  | Marker33443 Marker21924 |
| 82.48  | Marker23725             |
| 84.14  | Marker26542             |
| 84.31  | Marker34804             |
| 85.32  | Marker34799             |
| 85.91  | Marker3412              |
| 89.11  | Marker38950             |
| 91.61  | Marker15137             |
| 91.84  | Marker25246             |
| 92.83  | Marker10335             |
| 94.22  | Marker19293             |
| 94.73  | Marker19385 Marker19803 |
| 97.47  | Marker31960             |
| 106.41 | Marker13841             |

LG A8

|        |                         |
|--------|-------------------------|
| 0.00   | Marker21881             |
| 6.82   | Marker20588             |
| 9.43   | Marker4124              |
| 12.42  | Marker42421             |
| 13.80  | Marker26131             |
| 17.15  | Marker37487             |
| 18.10  | Marker35464             |
| 19.42  | Marker28322             |
| 19.80  | Marker4154              |
| 20.02  | Marker37472             |
| 21.28  | Marker4167              |
| 22.09  | Marker40091             |
| 22.42  | Marker36557             |
| 23.03  | Marker20547             |
| 23.05  | Marker2993              |
| 23.67  | Marker26132 Marker4122  |
| 24.16  | Marker20571             |
| 25.83  | Marker43853             |
| 26.04  | Marker26905             |
| 26.16  | Marker20578             |
| 26.77  | Marker20565 Marker25393 |
| 27.40  | Marker3648              |
| 27.95  | Marker7136              |
| 28.64  | Marker42611             |
| 29.38  | Marker4146              |
| 29.54  | Marker43746             |
| 29.98  | Marker18724             |
| 31.11  | Marker12944             |
| 31.74  | Marker26310             |
| 31.75  | Marker9259              |
| 32.19  | Marker26117             |
| 32.34  | Marker24031             |
| 32.63  | Marker34276             |
| 32.82  | Marker2390              |
| 32.99  | Marker62377             |
| 33.00  | Marker26341             |
| 33.22  | Marker34307             |
| 33.70  | Marker12934             |
| 34.92  | Marker34277             |
| 35.17  | Marker9494              |
| 35.93  | Marker28216             |
| 36.09  | Marker2924              |
| 36.33  | Marker5687              |
| 36.99  | Marker40624             |
| 37.60  | Marker6564              |
| 38.37  | Marker31934             |
| 38.79  | Marker38230             |
| 39.25  | Marker29526             |
| 39.73  | Marker15823             |
| 40.13  | Marker25389 Marker38221 |
| 40.24  | Marker7892              |
| 40.31  | Marker32845             |
| 40.63  | Marker19633             |
| 40.79  | Marker5154              |
| 40.94  | Marker5139              |
| 41.32  | Marker5758              |
| 41.59  | Marker32202             |
| 41.73  | Marker18149             |
| 41.85  | Marker27502             |
| 42.37  | Marker7881              |
| 42.55  | Marker4664              |
| 42.80  | Marker26940             |
| 43.26  | Marker12495             |
| 43.33  | Marker32842             |
| 43.79  | Marker1735              |
| 44.21  | Marker32841             |
| 45.45  | Marker9769              |
| 45.71  | Marker28988             |
| 45.93  | Marker6677              |
| 46.00  | Marker34760             |
| 46.32  | Marker2324              |
| 46.48  | Marker5169              |
| 46.70  | Marker60171 Marker44988 |
| 46.81  | Marker2290              |
| 47.30  | Marker4428              |
| 47.87  | Marker21510             |
| 48.22  | Marker42925             |
| 48.67  | Marker22562             |
| 48.93  | Marker2503              |
| 48.95  | Marker30463             |
| 49.32  | Marker4677              |
| 49.83  | Marker24841             |
| 50.38  | Marker6529              |
| 50.76  | Marker32834             |
| 51.34  | Marker35461             |
| 51.83  | Marker44062             |
| 52.00  | Marker24873             |
| 52.97  | Marker268               |
| 53.23  | Marker19710             |
| 53.48  | Marker30924 Marker59635 |
| 53.85  | Marker22683             |
| 54.32  | Marker16062             |
| 54.93  | Marker9105              |
| 55.60  | Marker25777             |
| 55.63  | Marker43553             |
| 55.98  | Marker8849              |
| 56.04  | Marker11483             |
| 56.74  | Marker25770             |
| 57.42  | Marker31868             |
| 57.81  | Marker16437             |
| 58.12  | Marker11530             |
| 58.70  | Marker30921             |
| 58.84  | Marker38741             |
| 58.96  | Marker5954 Marker39847  |
| 59.09  | Marker38316             |
| 59.19  | Marker22713             |
| 59.71  | Marker25773             |
| 59.92  | Marker7696 Marker11520  |
| 60.09  | Marker3806              |
| 60.20  | Marker8424 Marker61260  |
| 60.58  | Marker8422 Marker34974  |
| 61.20  | Marker34976             |
| 61.87  | Marker34594             |
| 62.81  | Marker33255             |
| 63.12  | Marker47217             |
| 63.88  | Marker11445             |
| 64.76  | Marker11494             |
| 65.16  | Marker10771             |
| 65.57  | Marker42589 Marker26695 |
| 67.36  | Marker10770             |
| 67.58  | Marker3796              |
| 68.37  | Marker3800              |
| 68.93  | Marker6693              |
| 69.74  | Marker31627 Marker31628 |
| 70.19  | Marker20003             |
| 70.51  | Marker19087             |
| 71.02  | Marker20486             |
| 71.20  | Marker42201             |
| 71.66  | Marker4621              |
| 71.74  | Marker3769 Marker11522  |
| 72.15  | Marker8681              |
| 72.42  | Marker27468             |
| 72.52  | Marker2039              |
| 72.61  | Marker16842             |
| 72.85  | Marker17613             |
| 73.11  | Marker20008 Marker15945 |
| 73.24  | Marker5847 Marker27532  |
| 73.74  | Marker21075             |
| 73.98  | Marker35756 Marker20002 |
| 74.57  | Marker21119             |
| 75.16  | Marker18803             |
| 75.48  | Marker44110             |
| 75.72  | Marker11454             |
| 76.01  | Marker42554             |
| 76.66  | Marker40864 Marker18801 |
| 76.72  | Marker12591             |
| 77.66  | Marker43027             |
| 78.46  | Marker19720             |
| 79.02  | Marker21152             |
| 79.71  | Marker27146             |
| 80.28  | Marker20468             |
| 80.64  | Marker2040              |
| 82.85  | Marker20476             |
| 83.96  | Marker2035              |
| 84.28  | Marker27524             |
| 84.87  | Marker42487             |
| 85.95  | Marker21073             |
| 87.30  | Marker9125              |
| 87.61  | Marker28557             |
| 88.73  | Marker4376              |
| 89.37  | Marker14883             |
| 89.52  | Marker15955             |
| 90.27  | Marker28771             |
| 91.34  | Marker7703              |
| 92.24  | Marker19069             |
| 92.89  | Marker36696             |
| 93.46  | Marker27470             |
| 93.76  | Marker20471             |
| 94.58  | Marker17617             |
| 94.74  | Marker21071             |
| 96.36  | Marker17618             |
| 96.66  | Marker19068             |
| 97.4   | Marker22785             |
| 99.36  | Marker8607              |
| 101.51 | Marker21121             |
| 102.19 | Marker21120             |
| 103.56 | Marker21110             |
| 112.59 | Marker25227             |
| 113.02 | Marker5936              |
| 113.46 | Marker20496             |
| 118.35 | Marker14792 Marker22875 |
|        | Marker5574              |
|        | Marker20478             |
|        | Marker8624              |
|        | Marker17612             |
|        | Marker23465             |
|        | Marker12589             |
|        | Marker270               |
|        | Marker27481             |



LG A9

|       |                         |
|-------|-------------------------|
| 0.00  | Marker8801              |
| 5.15  | Marker7204 Marker28384  |
| 6.04  | Marker42687 Marker16367 |
| 6.71  | Marker12745             |
| 6.87  | Marker18101             |
| 7.56  | Marker8795              |
| 8.22  | Marker18099             |
| 8.23  | Marker31542             |
| 9.19  | Marker43293             |
| 9.37  | Marker41148             |
| 9.47  | Marker31533             |
| 10.06 | Marker27641             |
| 10.16 | Marker31563             |
| 10.55 | Marker26956             |
| 10.63 | Marker45442             |
| 10.82 | Marker44034             |
| 11.36 | Marker16167             |
| 11.47 | Marker7678              |
| 11.88 | Marker3623              |
| 12.13 | Marker22024             |
| 12.46 | Marker36439             |
| 12.55 | Marker26941             |
| 12.96 | Marker31529             |
| 13.10 | Marker31543             |
| 13.52 | Marker31547             |
| 13.59 | Marker8826              |
| 13.65 | Marker18073             |
| 13.73 | Marker8825              |
| 14.33 | Marker8811 Marker44036  |
| 14.45 | Marker31567             |
| 14.62 | Marker44170             |
| 15.07 | Marker31560             |
| 15.24 | Marker7448              |
| 15.30 | Marker27644             |
| 15.30 | Marker2655 Marker31537  |
| 15.72 | Marker8945              |
| 15.94 | Marker44037             |
| 16.33 | Marker35219             |
| 17.32 | Marker28131             |
| 17.73 | Marker18560             |
| 17.98 | Marker35987             |
| 18.04 | Marker11871             |
| 18.21 | Marker25850 Marker25849 |
| 18.68 | Marker13411             |
| 18.72 | Marker28130             |
| 19.07 | Marker13150             |
| 19.67 | Marker22553             |
| 19.74 | Marker32118             |
| 20.19 | Marker43279             |
| 20.54 | Marker41985             |
| 20.56 | Marker5355              |
| 21.07 | Marker49930             |
| 21.14 | Marker11879             |
| 21.62 | Marker19547             |
| 21.92 | Marker32076             |
| 22.21 | Marker30600             |
| 22.41 | Marker18085 Marker8508  |
| 22.59 | Marker7433              |
| 22.71 | Marker13132             |
| 23.13 | Marker13405             |
| 23.70 | Marker8479              |
| 24.77 | Marker19506             |
| 25.38 | Marker41982             |
| 25.48 | Marker17124 Marker32980 |
| 25.67 | Marker8256              |
| 26.51 | Marker41379             |
| 27.16 | Marker13140             |
| 27.46 | Marker127 Marker30763   |
| 27.92 | Marker8476              |
| 28.38 | Marker18563             |
| 28.55 | Marker32635 Marker61140 |
| 29.16 | Marker30375             |
| 29.57 | Marker49874             |
| 29.59 | Marker13153             |
| 29.84 | Marker32651 Marker25835 |
| 30.02 | Marker35788             |
| 30.29 | Marker12744             |
| 30.72 | Marker8318              |
| 30.80 | Marker16893             |
| 31.10 | Marker16168             |
| 31.55 | Marker28273             |
| 31.72 | Marker23397             |
| 31.79 | Marker31425             |
| 32.20 | Marker44444             |
| 32.53 | Marker35843             |
| 32.83 | Marker31296             |
| 33.06 | Marker2580              |
| 33.51 | Marker25744             |
| 33.70 | Marker39126             |
| 34.15 | Marker31400             |
| 34.41 | Marker7206              |
| 34.65 | Marker31303             |
| 34.87 | Marker33777             |
| 35.55 | Marker30380             |
| 36.44 | Marker25138             |
| 36.78 | Marker48257             |
| 36.91 | Marker56360 Marker2591  |
| 37.63 | Marker32334             |
| 37.69 | Marker22095             |
| 37.74 | Marker10306             |
| 37.91 | Marker36134             |
| 38.29 | Marker41858             |
| 38.49 | Marker39479             |
| 38.94 | Marker30387             |
| 38.98 | Marker11414             |
| 39.59 | Marker8232 Marker8227   |
| 40.47 | Marker23437             |
| 40.64 | Marker3745              |
| 40.94 | Marker8509              |
| 40.96 | Marker29104             |
| 41.26 | Marker6108              |
| 42.37 | Marker26997             |
| 42.73 | Marker35200             |
| 43.70 | Marker31009             |
| 43.90 | Marker33425             |
| 44.62 | Marker35682             |
| 45.17 | Marker41779             |
| 45.24 | Marker22098             |
| 45.48 | Marker6868              |
| 45.84 | Marker8241              |
| 46.80 | Marker30815             |
| 47.22 | Marker16655 Marker36147 |
| 47.74 | Marker128 Marker16656   |
| 49.19 | Marker28383             |
| 50.95 | Marker30273 Marker15856 |
| 51.42 | Marker2782              |
| 51.89 | Marker13726             |
| 53.03 | Marker3242              |
| 53.30 | Marker46011 Marker31073 |
| 53.89 | Marker21751             |
| 54.57 | Marker62692             |
| 54.79 | Marker29174 Marker21733 |
| 55.37 | Marker24926 Marker26240 |
| 55.73 | Marker29494             |
| 56.24 | Marker17569             |
| 56.43 | Marker35380 Marker26123 |
| 56.79 | Marker36283             |
| 56.91 | Marker45545 Marker33946 |
| 57.47 | Marker13004             |
| 57.81 | Marker41519             |
| 57.86 | Marker2280              |
| 57.89 | Marker31016             |
| 58.28 | Marker4519              |
| 58.60 | Marker32829             |
| 58.71 | Marker30817             |
| 58.97 | Marker30469             |
| 59.17 | Marker34034             |
| 59.31 | Marker29887             |
| 59.54 | Marker36298 Marker25114 |
| 59.72 | Marker14661             |
| 59.81 | Marker59095             |
| 59.85 | Marker29779             |
| 60.03 | Marker38530             |
| 60.25 | Marker36128 Marker24927 |
| 60.46 | Marker30816             |
| 60.62 | Marker25107 Marker36149 |
| 60.77 | Marker24904             |
| 60.81 | Marker32805             |
| 60.96 | Marker29182             |
| 61.12 | Marker10052             |
| 61.37 | Marker33343             |
| 61.42 | Marker8335              |
| 61.47 | Marker9811              |
| 61.75 | Marker27543             |
| 61.86 | Marker34631             |
| 62.21 | Marker3310 Marker15900  |
| 62.36 | Marker31957             |
| 62.47 | Marker30834             |
| 62.94 | Marker3226              |
| 63.20 | Marker29885             |
| 63.59 | Marker25117             |
| 63.92 | Marker23424             |
| 64.29 | Marker7580              |
| 64.65 | Marker2788 Marker32018  |
| 64.70 | Marker25679             |
| 64.75 | Marker21730             |
| 66.18 | Marker4114              |
| 66.49 | Marker36288             |
| 66.84 | Marker56623             |
| 67.61 | Marker29197             |
| 68.16 | Marker8772              |
| 68.33 | Marker33357             |
| 68.42 | Marker33947             |
| 68.79 | Marker34673             |
| 68.86 | Marker57888             |
| 69.61 | Marker21844             |
| 70.23 | Marker13767             |
| 70.30 | Marker38529             |
| 70.90 | Marker24903             |
| 71.50 | Marker11610             |
| 72.19 | Marker36305             |
| 72.25 | Marker25110             |
| 72.54 | Marker18672             |
| 73.71 | Marker1857              |
| 74.26 | Marker11410             |
| 74.87 | Marker21830             |
| 78.04 | Marker41799             |
| 78.97 | Marker1853              |
| 80.33 | Marker2593              |
| 94.65 | Marker30280             |

# LG A10

|        |                         |
|--------|-------------------------|
| 0.00   | Marker352               |
| 0.81   | Marker19158             |
| 1.59   | Marker485 Marker439     |
| 2.68   | Marker38061 Marker10575 |
| 3.12   | Marker203               |
| 7.80   | Marker8141              |
| 10.74  | Marker28020             |
| 12.90  | Marker42806             |
| 15.02  | Marker11970 Marker25738 |
|        | Marker6211              |
| 16.18  | Marker433               |
| 16.30  | Marker4698              |
| 16.59  | Marker42802             |
| 17.01  | Marker23414 Marker12665 |
| 17.31  | Marker25349             |
| 18.11  | Marker4845              |
| 18.45  | Marker130               |
| 19.11  | Marker59792             |
| 19.49  | Marker33744             |
| 20.21  | Marker30427             |
| 20.50  | Marker35558             |
| 20.73  | Marker33492             |
| 21.92  | Marker7971              |
| 22.23  | Marker33490             |
| 23.15  | Marker14201             |
| 24.06  | Marker4709              |
| 24.92  | Marker32434             |
| 25.10  | Marker25875             |
| 25.80  | Marker2611              |
| 26.27  | Marker32424             |
| 26.71  | Marker31030             |
| 27.31  | Marker32420             |
| 27.37  | Marker23418             |
| 28.00  | Marker32425             |
| 28.17  | Marker32435             |
| 28.56  | Marker21042             |
| 29.06  | Marker33932             |
| 29.57  | Marker7765 Marker6722   |
| 29.99  | Marker12435             |
| 30.80  | Marker3356              |
| 30.98  | Marker7480 Marker23421  |
| 32.21  | Marker31039             |
| 32.32  | Marker42813             |
| 33.67  | Marker11939             |
| 34.94  | Marker30977             |
| 35.28  | Marker32604             |
| 35.33  | Marker43264             |
| 36.40  | Marker32537             |
| 37.59  | Marker10311             |
| 37.83  | Marker43078             |
| 38.16  | Marker34592             |
| 38.63  | Marker16129             |
| 38.78  | Marker40470             |
| 39.33  | Marker43267             |
| 42.62  | Marker30982             |
| 43.71  | Marker32436             |
| 46.38  | Marker22541             |
| 48.95  | Marker31041             |
| 54.11  | Marker302 Marker535     |
| 54.35  | Marker22609             |
|        | Marker26062 Marker34542 |
| 55.18  | Marker23314 Marker41661 |
|        | Marker31512 Marker14828 |
| 56.37  | Marker10724             |
| 58.48  | Marker703               |
| 58.57  | Marker33539             |
| 59.68  | Marker12878             |
| 59.94  | Marker8139              |
| 60.00  | Marker28235 Marker6920  |
|        | Marker15528 Marker28234 |
| 62.48  | Marker4471              |
| 62.69  | Marker2868              |
| 63.73  | Marker10542             |
| 66.01  | Marker35771             |
| 66.55  | Marker16915 Marker38507 |
| 67.21  | Marker36678 Marker6768  |
| 68.27  | Marker46532             |
| 69.68  | Marker6824              |
| 70.49  | Marker44571             |
| 70.69  | Marker36919             |
| 73.31  | Marker27657             |
| 73.87  | Marker28960             |
| 74.16  | Marker19772             |
| 75.48  | Marker36935             |
| 75.89  | Marker22796             |
| 76.18  | Marker36917             |
| 77.62  | Marker15497             |
| 79.39  | Marker12660             |
| 79.87  | Marker12644             |
| 80.37  | Marker12661             |
| 80.44  | Marker12655             |
| 81.07  | Marker12662             |
| 81.58  | Marker5723 Marker4496   |
| 83.21  | Marker22766             |
| 84.39  | Marker17442             |
| 86.07  | Marker31906             |
| 86.42  | Marker44366             |
| 87.20  | Marker16002             |
| 87.88  | Marker11719             |
| 88.47  | Marker43411             |
| 90.37  | Marker35090 Marker13057 |
|        | Marker13392 Marker21322 |
| 93.64  | Marker1986              |
| 101.99 | Marker26506             |
