# Supplementary material for: A High-Density SNP Genetic Linkage Map and QTL Analysis of Growth-Related Traits in a Hybrid Family of Oysters (Crassostrea gigas × Crassostrea angulata) Using Genotyping-by-Sequencing
Source: Oxford University Press journal article supplement (doi:10.1534/g3.116.026971), 2016-05-01

**Segregation distortion of markers on LG A1**

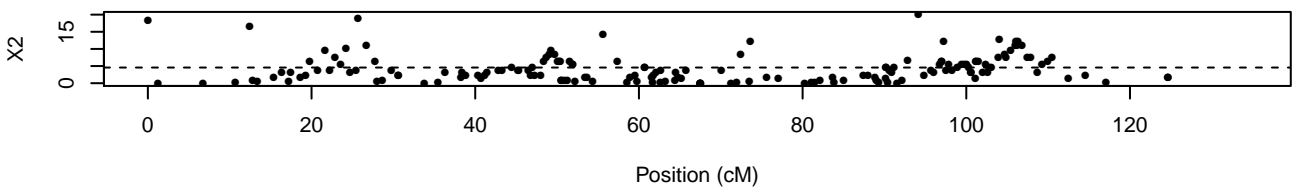

**Segregation distortion of markers on LG A2**

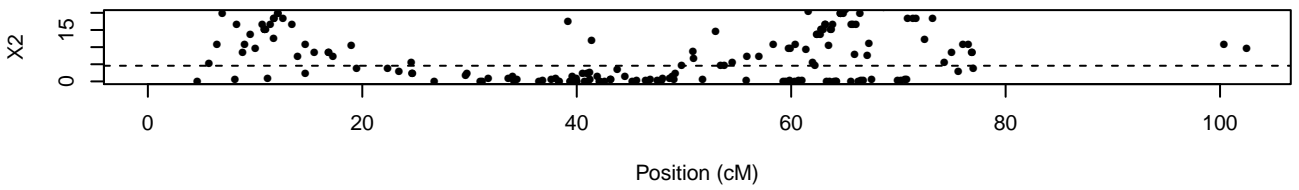

**Segregation distortion of markers on LG A3**

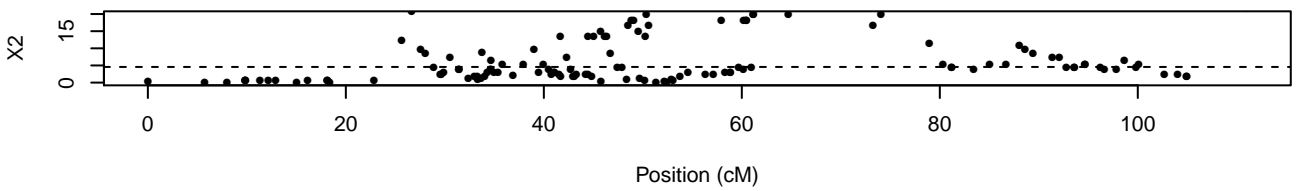

**Segregation distortion of markers on LG A4**

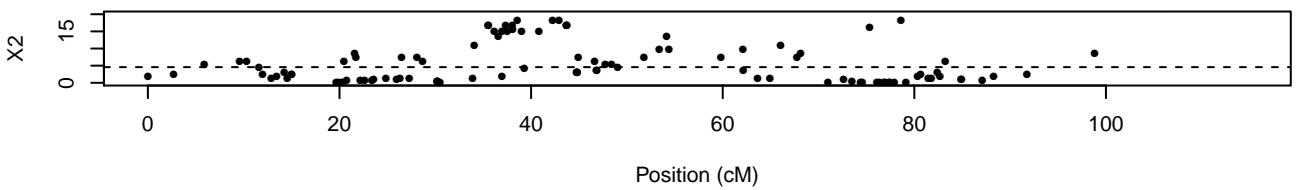

**Segregation distortion of markers on LG A5**

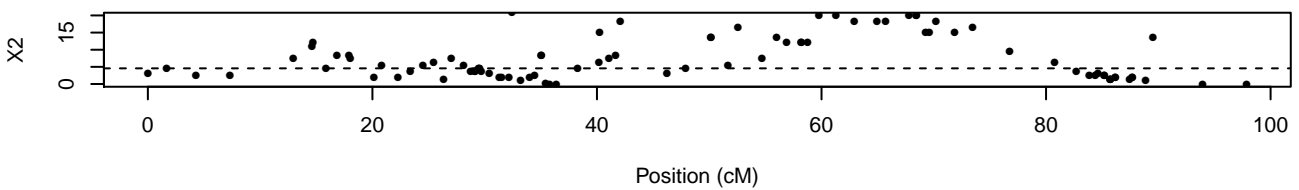

### Segregation distortion of markers on LG A6

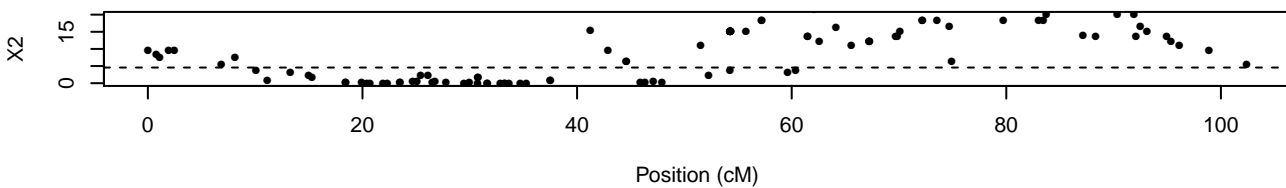

### Segregation distortion of markers on LG A7

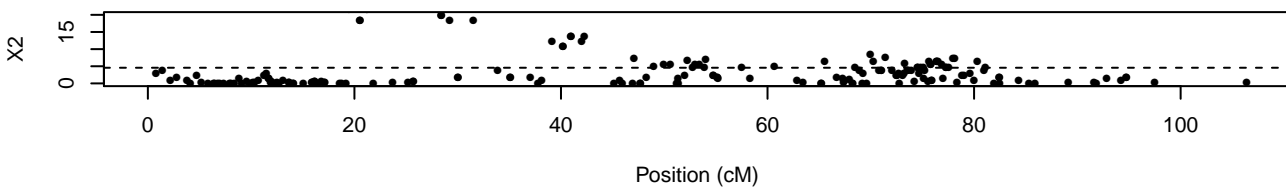

### Segregation distortion of markers on LG A8

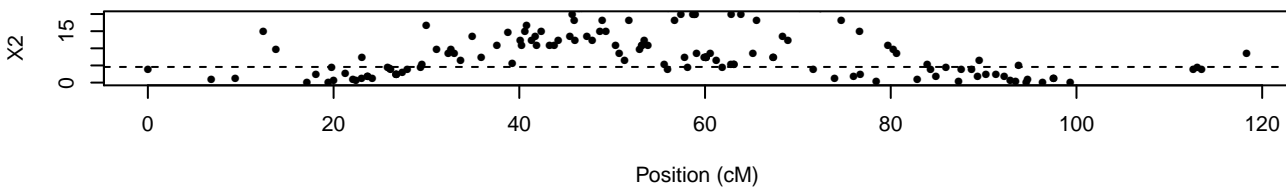

### Segregation distortion of markers on LG A9

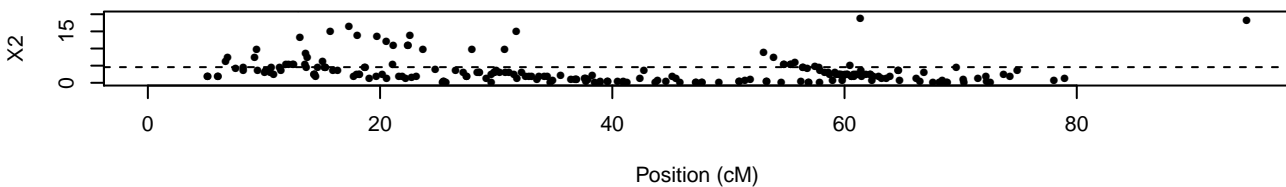

### Segregation distortion of markers on LG A10

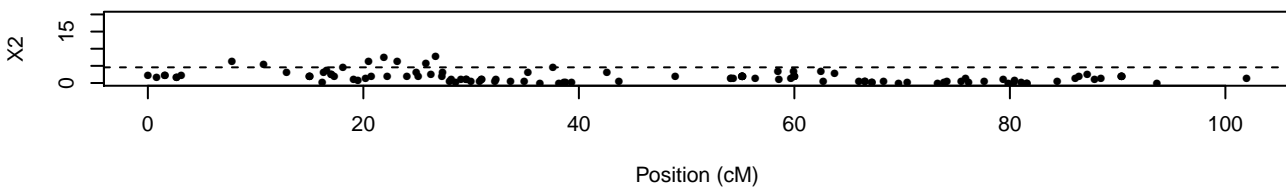

Supplement: 026971_files4.pdf [file 026971_files4.pdf]
