# Supplementary material for: A High-Density SNP Genetic Linkage Map and QTL Analysis of Growth-Related Traits in a Hybrid Family of Oysters (Crassostrea gigas × Crassostrea angulata) Using Genotyping-by-Sequencing
Source: G3 (Bethesda). 2016 Mar 17;6(5):1417–26. doi: 10.1534/g3.116.026971 (PMC4856092; doi:10.1534/g3.116.026971)
Supplement: Supplemental Material [file supp_g3.116.026971_TableS1.xlsx]

## Sheet: Sheet1
Table S1. Values of five growth-related traits and gender for every progeny of the hybridized family of Crassostrea gigas and C. angulata.
Progeny ID	Shell height (cm)	Shell length (cm)	Shell width (cm)	Mass weight (g)	Soft tissue weight (g)	Gender
p2	8.5	4.9	3	6.6	1.3	Female
p7	8.3	4.4	2.7	4.7	1.2	Male
p8	7.9	4.7	2.3	5.3	1.1	Female
p9	7.9	4.8	2.8	5.3	1.1	Female
p12	8.2	4.5	2.4	5.3	1.1	Female
p13	9.2	5	2.7	7	1.5	Female
p14	7.3	4.4	2.6	4.4	0.9	Female
p15	7.9	5.8	3.2	7.6	1.8	Female
p16	8.7	5.1	2.6	6	1.2	Female
p17	7.4	4.9	2.6	4.5	1.2	Female
p19	8.8	4.6	2.7	5.4	1.1	Female
p21	8.8	5.1	2.4	5.1	1.5	Male
p22	6.9	4	2.4	3.3	0.9	Female
p23	8.5	5	2.6	5.7	1.4	Female
p25	8.3	4.8	2.7	5.5	1.4	Female
p26	9.4	4.9	2.4	6.8	1.5	Female
p27	7.9	5.1	2.4	5.3	1.3	Female
p29	6.2	4.4	2.3	3.8	1	Male
p30	7.7	4.8	2.4	5.5	1.4	Male
p31	6.8	4.9	3	5.2	1.2	Male
p33	8.6	5.1	2.7	5.9	1.3	Male
p34	8.6	5	2.8	6.6	1.6	Male
p35	7.6	4.4	2.3	4.4	1.1	Male
p36	7.5	5.6	2.4	5.5	1	Female
p38	7.4	4.9	2.6	5.7	1.2	Female
p39	9.9	5.6	2.5	7.4	1.9	Male
p40	4.5	3.8	2	2	1.2	Male
p41	6.6	5.2	2.4	3.9	1	Female
p42	7.2	4.7	2.3	5	0.5	Male
p43	8.2	3.9	1.9	3.7	0.9	Female
p46	8.6	5.1	2.9	6.8	1.3	Female
p47	9.2	4.6	2.6	5.3	1.3	Male
p50	7.5	4.3	2.2	3.6	0.8	Female
p53	6.9	5.3	2.6	4.7	1.3	Male
p54	7.7	5.1	2.2	4.5	1.1	Male
p55	9	5.1	2.7	5.8	1.4	Male
p56	8.8	4.1	2	4.4	1.1	Female
p60	7	4.7	2.5	4.6	1.1	Male
p61	8.1	4.6	2.4	4.9	1.1	Female
p63	6.2	4.1	2.4	3.5	0.9	Male
p64	9.2	4.7	1.9	5.6	1.2	Male
p65	5.5	4.7	1.8	2.4	0.6	Male
p67	4.9	3.7	1.9	1.6	0.5	Male
p69	3.7	2.6	1.9	1	0.2	Male
p70	5.8	3.8	2.1	3	0.7	Male
p75	8.6	4.4	2.3	5.1	1.3	Female
p76	9	3.4	2.5	6.1	1.5	Male
p77	6.8	4.3	2.2	3.5	0.9	Male
p79	8.6	4.5	2.6	4.5	1.1	Male
p81	6.8	4.6	2.5	3	0.7	Female
p82	8.3	5	2.9	5.8	1	Female
p83	8.2	4.3	2	3.9	1	Male
p85	6.7	4	2.8	3.4	0.8	Female
p87	9.3	4.9	2.6	5.6	1.4	Female
p88	7.2	5	3	6.1	1.4	Male
p89	8.6	4.5	2.1	4.1	1	Male
p91	7.3	4.5	2.3	4.7	1.2	Male
p92	7.7	4.5	2.3	5.1	1	Male
p93	8	3.9	2.1	3.3	0.7	Female
p94	9.2	3.1	2.2	5	0.9	Female
p96	8.1	4.5	2.3	5.4	1.1	Female
p97	8.9	4.6	2.3	4.6	1.1	Female
p98	8.4	4.5	2.5	5.5	1.2	Female
p99	5.8	4.2	2.3	2.5	0.8	Male
p100	9.3	4.8	2.6	6.7	1.1	Female
p101	7.3	3.4	2.2	2.9	0.7	Male
p102	7.8	4.6	2.6	5.3	1.3	Female
p104	6.8	3.6	2.1	3.2	0.7	Male
p106	9.6	4.2	2.3	4.7	1.1	Male
p108	7.7	3.9	2.5	4.8	0.9	Female
p109	5.8	3.3	2.3	2.6	0.6	Male
p110	5.3	3.9	1.9	2.3	0.7	Male
p112	8.5	4.2	2	4	1	Female
p113	6.1	4.6	2.3	3.5	0.7	Female
p114	7.4	4.6	2	3.9	0.8	Female
p115	8.1	5.2	2.7	5.6	1.3	Female
p116	8	4.3	2.5	4	0.8	Female
p117	8.5	4.9	2.6	5.9	1.5	Male
p118	8.2	4.7	2.4	6.2	1.2	Male
p120	8.4	5.2	2.7	5.9	1.2	Female
p122	7.9	4.6	2.6	5	1.2	Female
p124	7	4.2	2.1	4.1	1	Male
p126	5.3	4	2.2	2.8	0.6	Male
p127	6.9	4.1	2.4	3.9	1	Male
p128	5.7	3.9	1.9	2.3	0.6	Male
p129	7	4.2	2.3	3.8	1.1	Male
p130	7.8	4.7	2.2	4.6	1.2	Female
p132	6.4	4.8	2	3.4	0.9	Male
p133	7.1	3.6	2	3	0.7	Male
p134	6.8	3.8	2.1	3.3	0.7	Male
p135	6.4	4.3	2	2.9	0.8	Male
p136	8.2	4.2	2.3	5.1	1.2	Female
p137	6.8	3.5	2.2	3	0.8	Male
p184	6.3	3.5	2.2	3.1	0.7	Male
p186	6.8	4.6	2.6	5.3	1.1	Female
p188	9	5.3	2.2	6.6	1.4	Female
p189	7.6	5.2	2.8	5.7	1.2	Female
p190	6.4	4.8	2.6	4.9	0.8	Female
p191	8.6	4.6	2.5	4.7	1.2	Male
p192	8.6	5.2	2.8	6.1	1.4	Female
p194	6.9	3.9	2.4	3.5	0.8	Male
p195	6.3	4	2.4	3.7	1	Male
p196	8.4	3.8	2.1	4.2	1	Male
p198	7.5	5.5	2.6	5.2	1.3	Male
p199	5.2	3.8	2.2	2.5	0.6	Male
p200	7.6	3.7	2	3	0.9	Male
