# Supplementary material for: A High-Density SNP Genetic Linkage Map and QTL Analysis of Growth-Related Traits in a Hybrid Family of Oysters (Crassostrea gigas × Crassostrea angulata) Using Genotyping-by-Sequencing
Source: G3 (Bethesda). 2016 Mar 17;6(5):1417–26. doi: 10.1534/g3.116.026971 (PMC4856092; doi:10.1534/g3.116.026971)
Supplement: Supplemental Material [file supp_g3.116.026971_TableS2.xlsx]

## Sheet: Sheet1
Table S2. Correlations between the five growth-related traits in a hybridized family of Crassostrea gigas and C. angulata.
	Shell height	Shell length	Shell width	Mass weight	Soft tissue weight
Shell height	1	0.455	0.397	0.793	0.709
Shell length	\	1	0.591	0.73	0.687
Shell width	\	\	1	0.708	0.608
Mass weight	\	\	\	1	0.852
Soft tissue weight	\	\	\	\	1
