# Supplementary material for: A High-Density SNP Genetic Linkage Map and QTL Analysis of Growth-Related Traits in a Hybrid Family of Oysters (Crassostrea gigas × Crassostrea angulata) Using Genotyping-by-Sequencing
Source: G3 (Bethesda). 2016 Mar 17;6(5):1417–26. doi: 10.1534/g3.116.026971 (PMC4856092; doi:10.1534/g3.116.026971)
Supplement: Supplemental Material [file supp_g3.116.026971_TableS3.xlsx]

## Sheet: Sheet1
Table S3. Details of the sequencing and genotyping results of the six genotyping-by-sequencing libraries for the hybridized family of Crassostrea gigas and C. angulata.
Individual ID	Raw reads number	Clean reads number	Mapping rate	Genome coverage	Rad loci number	Rad loci depth
Female parent	7018482	4145760	0.7763	0.00820547	54110	91.463
Male parent	4422454	6519449	0.7465	0.00728588	47669	63.3628
p2	1059693	1020003	0.7541	0.00415508	26762	28.7766
p7	3507733	3254409	0.748	0.00591307	38353	61.7487
p8	12486531	11587055	0.819	0.00987834	64913	143.196
p9	6963403	6493030	0.7682	0.00771584	51164	95.3167
p12	1624335	1508700	0.7344	0.00384434	24620	44.2859
p13	2378784	2200614	0.7419	0.00488101	31474	50.9962
p14	4116172	3803238	0.7443	0.0066476	43315	64.3571
p15	10122572	9343954	0.7763	0.0103156	68227	104.684
p16	2442085	2237281	0.747	0.00433381	28210	58.8431
p17	2774906	2567887	0.7158	0.00564877	36769	49.5405
p19	4957610	4545083	0.7536	0.00679527	44501	76.3768
p21	7165441	6552617	0.779	0.00811769	53391	94.969
p22	5840623	5305028	0.7905	0.00567783	37305	111.599
p23	7179191	6469835	0.7804	0.00769456	50590	100.22
p25	2630033	2382978	0.7378	0.00504932	32829	53.7464
p26	1697236	1555107	0.726	0.00377783	24460	46.2915
p27	5406123	4930234	0.7631	0.00717327	47014	80.2924
p29	1558173	1423158	0.7451	0.00355665	23053	46.1287
p30	2846905	2666999	0.7455	0.00820123	53215	36.5294
p31	8940487	8386126	0.7871	0.0121286	79974	80.9519
p33	4068367	3793132	0.7739	0.00803275	52625	54.4941
p34	8113793	7638297	0.7741	0.012004	79329	73.0205
p35	4413719	4155561	0.7674	0.00894113	58708	53.3156
p36	2044323	1910881	0.7493	0.00626222	40759	34.6106
p38	789226	733299	0.7421	0.00341802	21969	24.2731
p39	1273441	1181261	0.7791	0.00401583	26173	34.6572
p40	10397300	9526106	0.7979	0.0138062	90888	82.5417
p41	1468499	1365794	0.7432	0.00433387	28186	35.7085
p42	1022390	953041	0.7394	0.00422145	27313	25.5385
p43	5233969	4857624	0.7666	0.00989616	65133	56.7798
p46	5549223	5128483	0.7807	0.00991934	65350	60.8823
p47	3631003	3365481	0.7698	0.00824516	54057	47.6007
p50	4972574	4559743	0.7614	0.00940599	61168	56.9363
p53	2057259	1877931	0.7523	0.00695733	45082	31.4344
p54	3005026	2742185	0.7704	0.00810183	52663	40.2412
p55	4464076	4143430	0.7421	0.0105042	68386	45.0821
p56	3889992	3564092	0.7874	0.00754413	49146	57.2989
p60	2542495	2476639	0.7547	0.00767624	49858	36.8227
p61	5119219	4974133	0.7793	0.0097475	63916	59.7195
p63	1808366	1754149	0.777	0.00573756	37233	36.056
p64	9031412	8782302	0.7879	0.012473	82063	83.0864
p65	3312947	3227948	0.7849	0.00775009	50570	49.3789
p67	3164408	3066699	0.7733	0.00797073	51931	45.1436
p69	1954325	1892466	0.7685	0.00616923	40155	35.8094
p70	1001090	969178	0.7585	0.00380815	24600	29.5325
p75	7374589	7136285	0.7807	0.0113379	74663	73.8449
p76	4671930	4495441	0.7698	0.00887621	58518	58.8292
p77	7586142	7316414	0.7755	0.0112261	74255	76.0249
p79	9868533	9502026	0.776	0.0121122	80527	91.146
p81	6758422	6508910	0.7697	0.0107012	70788	70.4434
p82	7228031	6952959	0.7792	0.0104459	69212	77.8923
p83	9345035	8954501	0.7687	0.0131295	86868	79.3384
p85	4551755	4369704	0.7608	0.00928482	60859	54.6859
p87	2946018	2831727	0.7621	0.00732214	47886	45.1192
p88	6449624	6205189	0.7822	0.0107911	70963	68.4809
p89	2157624	2081494	0.7675	0.0102626	67128	23.4006
p91	10941936	10608836	0.8322	0.0145593	97274	89.6823
p92	6701507	6482794	0.7903	0.0129354	86315	58.4871
p93	13042135	12648160	0.8041	0.0173399	116678	85.9352
p94	2450544	2379252	0.7718	0.00845303	55474	32.5881
p96	3418336	3290935	0.7738	0.0115846	76115	33.0975
p97	2859613	2756011	0.7751	0.00871817	57218	36.9436
p98	3322706	3192490	0.7932	0.00998906	65759	38.1292
p99	6851439	6554583	0.8036	0.0144849	95707	54.5095
p100	2890370	2785323	0.7962	0.0083382	54859	40.231
p101	4933869	4752042	0.7729	0.0125271	82558	44.2555
p102	5493388	5298626	0.8181	0.0106667	70381	61.3128
p104	5389003	5172045	0.7899	0.0115162	75895	53.5565
p106	5120510	4924214	0.7894	0.010663	70668	54.7644
p108	1456457	1402872	0.8036	0.00627443	40557	27.8265
p109	1583248	1511947	0.7793	0.00778841	50538	23.3476
p110	979211	939667	0.8288	0.0048683	31375	24.8516
p112	3541794	3409974	0.7978	0.00953685	62342	43.6847
p113	4282707	4116322	0.786	0.0104026	68191	47.4979
p114	7170866	6907169	0.7683	0.0145003	95880	54.4197
p115	7380067	7079474	0.7772	0.0130188	86554	62.4724
p116	3303692	3169414	0.7971	0.00760738	49982	49.7411
p117	7210826	6919145	0.7619	0.0135621	90177	57.4696
p118	4135161	3985166	0.778	0.00992016	65443	46.5693
p120	6433656	6163287	0.7663	0.0123891	82118	56.8667
p122	5082910	4864489	0.7677	0.0109097	72213	51.1608
p124	6287889	6012772	0.7722	0.0117073	77623	59.1836
p126	8360465	7993307	0.771	0.0146459	96718	62.9963
p127	3253329	3099713	0.7553	0.00886496	57219	34.8853
p128	4330460	4129433	0.7912	0.00963242	62495	45.8729
p129	4406363	4195354	0.7585	0.0102886	66585	40.492
p130	5730360	5457518	0.7697	0.0108214	70191	50.1834
p132	3971344	3780972	0.76	0.00939666	60828	39.5655
p133	4107198	2936309	0.7629	0.0099398	64823	34.6111
p134	4227216	3028636	0.8175	0.00777395	50671	48.9523
p135	2998992	2156664	0.784	0.00784034	51120	33.126
p136	3323274	2379320	0.7726	0.00888838	57797	31.8539
p137	339615	244779	0.7301	0.00211924	13635	13.1236
p184	4853199	4688676	0.7905	0.00531847	35527	102.999
p186	4455400	4297543	0.7743	0.00813426	54163	60.5245
p188	2134316	2071986	0.7681	0.00564926	37400	41.9933
p189	4179007	4056940	0.805	0.00473889	31242	103.567
p190	2806538	2712292	0.7568	0.0041763	27403	74.0228
p191	8024202	7732962	0.7653	0.00797809	31547	107.205
p192	9359096	8974699	0.7602	0.00867053	58079	116.136
p194	2276489	2203003	0.7525	0.00403868	26179	62.9609
p195	3381427	3243762	0.781	0.00443418	27385	76.0121
p196	1717836	1659056	0.7865	0.00471756	30670	42.3257
p198	5913015	5664706	0.7622	0.00663482	43628	98.3971
p199	4195862	4062001	0.8011	0.00476853	31283	103.49
p200	1970317	1897754	0.7344	0.00413253	26774	52.1119
