# Supplementary material for: A High-Density SNP Genetic Linkage Map and QTL Analysis of Growth-Related Traits in a Hybrid Family of Oysters (Crassostrea gigas × Crassostrea angulata) Using Genotyping-by-Sequencing
Source: G3 (Bethesda). 2016 Mar 17;6(5):1417–26. doi: 10.1534/g3.116.026971 (PMC4856092; doi:10.1534/g3.116.026971)
Supplement: Supplemental Material [file supp_g3.116.026971_TableS4.xlsx]

## Sheet: Sheet1
Table S4. Summary of single nucleotide substitutions identified in a hybridized family of Crassostrea gigas and C. angulata.
Total SNPs	40445	1
Transitions:	19439	0.481
A/G	9602	0.238
C/T	9837	0.243
Transversions:	21006	0.519
A/C	5214	0.129
A/T	7874	0.195
C/G	2303	0.057
G/T	5615	0.138
								`
