# Supplementary material for: A High-Density SNP Genetic Linkage Map and QTL Analysis of Growth-Related Traits in a Hybrid Family of Oysters (Crassostrea gigas × Crassostrea angulata) Using Genotyping-by-Sequencing
Source: G3 (Bethesda). 2016 Mar 17;6(5):1417–26. doi: 10.1534/g3.116.026971 (PMC4856092; doi:10.1534/g3.116.026971)
Supplement: Supplemental Material [file supp_g3.116.026971_TableS5.xlsx]

## Sheet: Sheet1
Table S5. Genotypes of 1695 mapped markers in 106 progeny of a hybridized family of Crassostrea gigas and C. angulata.
Marker name	Segregation pattern	p100	p101	p102	p104	p106	p108	p109	p110	p112	p113	p114	p115	p116	p117	p118	p12	p120	p122	p124	p126	p127	p128	p129	p13	p130	p132	p133	p134	p135	p136	p137	p14	p15	p16	p17	p184	p186	p188	p189	p19	p190	p191	p192	p194	p195	p196	p198	p199
Marker6978	<lmxll>	lm	ll	ll	ll	ll	lm	lm	ll	lm	lm	lm	ll	ll	ll	ll	ll	ll	ll	ll	ll	lm	ll	ll	lm	ll	ll	ll	ll	lm	ll	ll	ll	lm	ll	ll	ll	ll	ll	lm	ll	ll	ll	ll	ll	ll	ll	ll	ll
Marker6154	<lmxll>	ll	ll	ll	ll	ll	lm	lm	ll	ll	lm	lm	ll	lm	ll	ll	ll	ll	lm	ll	ll	lm	ll	lm	lm	ll	ll	ll	ll	lm	ll	ll	ll	lm	ll	ll	ll	ll	ll	lm	ll	ll	ll	ll	ll	ll	ll	lm	ll
Marker11231	<nnxnp>	np	nn	nn	np	nn	np	np	np	np	np	np	nn	nn	np	nn	nn	np	nn	nn	np	np	nn	nn	nn	nn	np	nn	np	np	nn	nn	nn	np	np	np	nn	nn	np	np	nn	nn	nn	nn	np	nn	nn	nn	nn
Marker27209	<nnxnp>	np	nn	np	np	nn	nn	np	np	np	np	np	nn	nn	np	np	nn	np	nn	nn	np	np	nn	nn	nn	nn	np	nn	np	np	nn	nn	nn	nn	np	np	nn	nn	np	np	nn	nn	nn	nn	np	nn	nn	nn	nn
Marker36408	<efxeg>	eg	fg	fg	eg	eg	ee	eg	ee	--	eg	eg	fg	eg	fg	eg	fg	fg	eg	fg	fg	--	--	--	--	fg	fg	--	eg	ee	--	--	fg	eg	eg	--	--	eg	--	--	--	--	--	--	--	--	--	--	--
Marker23174	<nnxnp>	np	nn	np	np	nn	np	np	np	np	nn	np	np	nn	nn	nn	np	np	nn	nn	np	np	nn	nn	nn	nn	nn	nn	np	np	np	np	np	np	np	np	nn	nn	np	np	np	nn	np	nn	np	np	nn	nn	np
Marker33942	<nnxnp>	np	nn	np	np	nn	np	np	np	np	nn	np	np	nn	nn	nn	np	np	nn	nn	np	np	nn	nn	nn	nn	nn	nn	np	np	np	np	np	np	np	np	nn	nn	np	np	np	nn	np	nn	np	np	nn	nn	np
Marker30594	<efxeg>	ef	eg	--	ee	--	--	ef	ef	ef	ef	ef	eg	--	ee	--	ee	ee	--	eg	ee	ef	eg	--	--	eg	ee	eg	ef	ef	ef	eg	ee	ef	ef	ee	eg	--	ee	ef	ef	ef	ee	eg	ee	ee	ee	--	ee
Marker31690	<lmxll>	lm	ll	ll	ll	lm	lm	lm	lm	lm	lm	lm	ll	lm	ll	lm	ll	ll	lm	ll	ll	lm	ll	lm	lm	ll	ll	ll	ll	lm	lm	ll	ll	lm	lm	ll	ll	lm	ll	lm	lm	lm	lm	ll	ll	ll	ll	lm	ll
Marker6186	<lmxll>	lm	ll	ll	ll	lm	lm	lm	lm	lm	lm	lm	ll	lm	ll	lm	ll	ll	lm	ll	ll	lm	ll	lm	lm	ll	ll	ll	ll	lm	lm	ll	ll	lm	lm	ll	ll	lm	ll	lm	lm	lm	lm	ll	ll	ll	ll	lm	ll
Marker36395	<lmxll>	lm	ll	ll	ll	lm	lm	lm	lm	lm	lm	lm	ll	lm	ll	lm	ll	ll	lm	ll	ll	lm	ll	lm	lm	ll	ll	ll	ll	lm	lm	ll	ll	lm	lm	ll	ll	lm	ll	lm	lm	lm	lm	ll	ll	ll	ll	lm	ll
Marker3864	<lmxll>	lm	ll	ll	ll	lm	lm	lm	lm	lm	lm	lm	ll	lm	ll	lm	lm	ll	lm	ll	ll	lm	ll	lm	lm	ll	ll	ll	ll	lm	lm	ll	ll	lm	lm	ll	ll	lm	ll	lm	ll	lm	ll	ll	ll	ll	ll	lm	ll
Marker6161	<lmxll>	ll	lm	lm	lm	ll	ll	ll	ll	ll	ll	ll	lm	ll	lm	ll	ll	lm	ll	lm	lm	ll	lm	ll	ll	lm	lm	lm	lm	ll	ll	lm	lm	ll	ll	lm	lm	ll	lm	ll	ll	ll	lm	lm	lm	lm	lm	ll	lm
Marker30522	<nnxnp>	np	nn	np	np	nn	nn	np	np	np	np	np	nn	nn	np	nn	nn	np	nn	nn	np	np	nn	nn	nn	nn	np	nn	np	np	nn	nn	np	np	np	np	nn	nn	np	np	np	nn	nn	nn	np	nn	nn	nn	nn
Marker33148	<nnxnp>	np	nn	np	np	nn	np	np	np	np	np	np	nn	nn	np	nn	np	np	nn	nn	np	np	nn	nn	nn	nn	np	nn	np	np	np	nn	np	np	np	np	nn	nn	np	np	np	nn	np	nn	np	np	nn	nn	np
Marker30525	<nnxnp>	nn	np	nn	nn	np	np	nn	nn	nn	np	nn	np	np	np	np	nn	nn	np	np	nn	nn	np	np	np	np	np	np	nn	nn	nn	np	nn	nn	nn	nn	np	np	nn	nn	nn	np	nn	np	np	nn	np	np	nn
Marker32491	<lmxll>	ll	lm	lm	lm	ll	ll	ll	ll	ll	ll	ll	lm	ll	lm	ll	ll	lm	ll	lm	lm	ll	lm	ll	ll	lm	lm	lm	ll	ll	ll	lm	lm	ll	ll	lm	lm	ll	lm	ll	ll	ll	lm	lm	lm	lm	lm	ll	lm
Marker18547	<nnxnp>	np	nn	np	np	nn	nn	np	np	np	np	np	nn	nn	np	nn	nn	np	nn	nn	np	np	nn	nn	nn	nn	np	nn	np	np	nn	nn	np	np	np	np	nn	nn	np	np	np	nn	nn	nn	np	nn	nn	nn	nn
Marker18608	<nnxnp>	np	nn	np	np	nn	nn	np	np	np	nn	np	nn	nn	nn	np	nn	np	nn	nn	nn	np	nn	nn	nn	nn	nn	nn	np	nn	nn	nn	nn	nn	np	nn	nn	nn	np	np	nn	nn	nn	nn	np	nn	nn	nn	np
Marker17544	<nnxnp>	np	nn	np	np	nn	nn	np	np	np	np	np	nn	nn	np	nn	np	np	nn	nn	np	np	nn	nn	nn	nn	np	nn	np	np	np	nn	np	np	np	np	nn	nn	np	np	np	nn	np	nn	nn	np	nn	nn	np
Marker36394	<lmxll>	ll	lm	lm	ll	ll	ll	ll	ll	ll	ll	ll	lm	ll	lm	ll	ll	lm	ll	lm	lm	ll	lm	ll	ll	lm	lm	lm	ll	ll	ll	lm	lm	ll	ll	lm	lm	ll	ll	ll	ll	ll	lm	lm	lm	lm	lm	ll	lm
Marker30552	<lmxll>	ll	lm	lm	ll	ll	ll	ll	ll	ll	ll	ll	lm	ll	lm	ll	ll	lm	ll	lm	lm	ll	lm	ll	ll	lm	lm	lm	ll	ll	ll	lm	lm	ll	ll	lm	lm	ll	ll	ll	ll	ll	lm	lm	lm	lm	lm	ll	lm
Marker6155	<nnxnp>	np	nn	np	np	nn	nn	np	np	np	np	np	nn	nn	np	nn	np	np	nn	nn	np	np	nn	nn	nn	nn	np	nn	np	np	np	nn	np	np	np	np	nn	nn	np	np	np	nn	np	nn	nn	np	nn	nn	nn
Marker16328	<nnxnp>	nn	np	nn	nn	np	np	nn	nn	nn	nn	nn	np	np	nn	np	nn	nn	np	np	nn	nn	np	np	np	np	nn	np	nn	nn	nn	np	nn	nn	nn	nn	np	np	nn	nn	nn	nn	nn	np	nn	nn	nn	np	nn
Marker30558	<nnxnp>	np	nn	np	np	nn	nn	np	np	np	np	np	nn	nn	np	nn	np	np	nn	nn	np	np	nn	nn	nn	nn	np	nn	np	np	np	nn	np	np	np	np	nn	nn	np	np	np	np	np	nn	np	np	np	nn	np
Marker41540	<efxeg>	ee	eg	ee	ee	fg	--	--	--	ef	ef	ef	eg	fg	--	--	--	ee	--	eg	ef	--	eg	fg	--	eg	ee	--	ee	ef	ee	--	--	ef	ef	ee	--	fg	--	--	ee	--	--	eg	--	--	--	--	--
Marker16336	<nnxnp>	np	nn	np	np	nn	np	np	np	np	np	np	nn	nn	np	nn	np	np	nn	nn	np	np	nn	nn	nn	nn	np	nn	np	np	np	nn	np	np	np	np	nn	nn	np	np	np	nn	np	nn	np	np	nn	nn	np
Marker48187	<nnxnp>	nn	np	nn	nn	np	np	nn	nn	nn	nn	nn	np	np	nn	np	nn	nn	np	np	nn	nn	np	np	np	np	nn	np	nn	nn	nn	np	nn	nn	nn	nn	np	np	nn	nn	nn	nn	nn	np	nn	nn	np	np	nn
Marker30513	<nnxnp>	np	nn	np	np	nn	nn	np	np	np	np	np	nn	nn	np	nn	np	np	nn	nn	np	np	nn	nn	nn	nn	np	nn	np	np	np	nn	np	np	np	np	nn	nn	np	np	np	nn	np	nn	np	np	nn	nn	np
Marker61915	<nnxnp>	np	nn	np	np	nn	nn	np	np	np	np	np	nn	nn	np	nn	np	np	nn	nn	np	np	nn	nn	nn	nn	np	nn	np	np	np	nn	np	np	np	np	nn	nn	np	np	np	nn	np	nn	np	np	nn	nn	np
Marker22170	<nnxnp>	np	nn	np	np	nn	nn	np	np	np	np	np	nn	nn	np	nn	np	np	nn	nn	np	np	nn	nn	nn	nn	np	nn	np	np	np	nn	np	np	np	np	nn	nn	np	np	np	nn	np	nn	np	np	nn	nn	np
Marker6223	<lmxll>	lm	lm	lm	lm	ll	ll	ll	ll	ll	ll	ll	lm	ll	lm	ll	lm	lm	ll	lm	lm	ll	lm	ll	ll	lm	lm	lm	lm	ll	ll	ll	lm	ll	ll	lm	lm	ll	lm	ll	lm	ll	lm	lm	lm	lm	lm	ll	lm
Marker37192	<efxeg>	--	ef	eg	fg	ef	ef	fg	fg	fg	fg	fg	ee	ef	eg	ef	eg	eg	ef	ee	eg	fg	ee	ef	--	ee	eg	ee	fg	fg	fg	ee	--	--	--	--	ee	ef	eg	fg	--	--	eg	ee	--	eg	ee	ef	--
Marker19337	<nnxnp>	nn	np	nn	nn	np	np	nn	nn	nn	nn	nn	np	np	nn	np	nn	nn	np	np	nn	nn	np	np	np	np	nn	np	nn	nn	nn	np	nn	nn	nn	nn	np	np	nn	nn	nn	np	nn	np	nn	nn	np	np	nn
Marker33142	<nnxnp>	np	nn	np	np	nn	nn	np	np	np	np	np	nn	nn	np	nn	np	np	nn	nn	np	np	nn	nn	np	nn	np	nn	np	np	np	nn	np	np	np	np	nn	nn	np	np	np	nn	np	nn	np	np	nn	nn	np
Marker34613	<nnxnp>	nn	np	nn	nn	np	np	nn	nn	nn	nn	nn	np	np	nn	np	nn	nn	np	np	nn	nn	np	np	nn	np	nn	np	nn	nn	nn	np	nn	nn	nn	nn	np	np	nn	nn	nn	np	nn	np	nn	nn	np	np	nn
Marker33141	<nnxnp>	np	nn	np	np	nn	nn	np	np	np	np	np	nn	nn	np	nn	np	np	nn	nn	np	np	nn	nn	np	nn	np	nn	np	np	np	nn	np	np	np	np	nn	nn	np	np	np	nn	np	nn	np	np	nn	nn	np
Marker13357	<lmxll>	ll	ll	lm	ll	ll	ll	ll	ll	ll	ll	ll	lm	ll	lm	ll	lm	lm	ll	lm	lm	ll	lm	ll	ll	lm	lm	lm	ll	ll	ll	lm	lm	ll	ll	lm	lm	ll	lm	ll	ll	ll	lm	lm	lm	lm	lm	ll	lm
Marker28342	<nnxnp>	np	nn	np	np	nn	nn	np	np	np	np	np	nn	nn	np	nn	np	np	nn	nn	np	np	nn	nn	nn	nn	np	nn	np	np	np	nn	np	np	np	np	nn	nn	np	np	np	nn	np	nn	nn	nn	nn	nn	nn
Marker32514	<nnxnp>	np	nn	np	np	nn	nn	np	np	np	np	np	nn	nn	np	nn	np	np	nn	nn	np	np	nn	nn	nn	nn	np	nn	np	np	np	nn	np	np	np	np	nn	nn	np	np	np	nn	nn	nn	nn	nn	nn	nn	nn
Marker6736	<lmxll>	ll	ll	ll	ll	lm	lm	lm	lm	ll	lm	lm	ll	lm	ll	lm	ll	ll	lm	ll	ll	lm	ll	lm	lm	ll	ll	ll	ll	lm	ll	lm	ll	lm	lm	ll	ll	lm	ll	lm	ll	lm	ll	ll	ll	ll	ll	lm	ll
Marker17766	<lmxll>	lm	lm	lm	lm	ll	ll	ll	ll	lm	ll	ll	lm	ll	lm	ll	lm	lm	ll	lm	lm	ll	lm	ll	ll	lm	lm	lm	lm	ll	lm	ll	lm	ll	ll	lm	lm	ll	lm	ll	lm	ll	lm	lm	lm	lm	lm	ll	lm
Marker30071	<nnxnp>	np	nn	np	np	nn	nn	np	np	np	nn	np	nn	nn	nn	nn	np	np	nn	nn	np	np	nn	nn	nn	nn	nn	nn	np	np	np	nn	np	np	np	np	nn	nn	np	np	np	nn	np	nn	np	np	nn	nn	np
Marker1589	<nnxnp>	np	nn	np	np	nn	nn	np	np	np	nn	np	nn	nn	nn	nn	np	np	nn	nn	np	np	nn	nn	nn	nn	nn	nn	np	np	np	nn	np	np	np	np	nn	nn	np	np	np	nn	np	nn	np	np	nn	nn	np
Marker40408	<efxeg>	ee	ee	ee	ee	ef	ee	ef	ee	--	ef	--	ef	ee	--	ef	--	ee	ee	--	ee	ee	ee	--	--	ee	ee	ee	ee	ee	ee	--	ee	ee	--	--	ee	ef	--	ee	ee	--	ee	ee	--	ee	--	--	--
Marker41535	<lmxll>	lm	lm	lm	lm	ll	ll	ll	ll	ll	ll	ll	lm	ll	lm	ll	lm	lm	ll	lm	lm	ll	lm	ll	ll	lm	lm	lm	lm	ll	ll	ll	lm	ll	ll	lm	lm	ll	lm	ll	ll	ll	lm	lm	lm	lm	lm	ll	ll
Marker33560	<lmxll>	ll	ll	lm	ll	ll	ll	ll	ll	ll	ll	ll	lm	ll	lm	ll	lm	lm	ll	lm	lm	ll	lm	ll	ll	lm	lm	lm	ll	ll	ll	lm	lm	ll	lm	lm	lm	ll	lm	ll	ll	ll	lm	lm	lm	lm	lm	ll	lm
Marker35312	<nnxnp>	np	nn	np	np	nn	nn	np	np	np	np	np	nn	nn	np	nn	np	np	nn	nn	np	np	nn	nn	np	nn	np	nn	np	np	nn	nn	np	np	np	np	nn	nn	np	np	nn	nn	np	nn	np	np	nn	nn	np
Marker11324	<lmxll>	ll	ll	lm	ll	ll	ll	ll	ll	ll	ll	ll	lm	ll	lm	ll	lm	lm	ll	lm	lm	ll	lm	ll	ll	lm	lm	lm	ll	ll	ll	lm	lm	ll	lm	lm	lm	ll	lm	ll	ll	ll	lm	lm	ll	lm	lm	ll	lm
Marker34616	<efxeg>	--	eg	--	ef	eg	eg	ee	ee	ee	ee	ee	eg	eg	--	eg	--	ef	eg	eg	ee	ee	--	eg	eg	eg	ee	eg	--	ee	ee	ee	ef	ee	--	--	--	eg	--	eg	ef	--	ee	ee	--	ee	--	eg	--
Marker34909	<lmxll>	lm	lm	ll	lm	lm	lm	lm	lm	lm	lm	lm	ll	lm	ll	lm	ll	ll	lm	ll	ll	lm	ll	lm	lm	ll	ll	ll	lm	lm	lm	ll	ll	lm	ll	ll	ll	lm	ll	lm	lm	lm	ll	ll	ll	ll	ll	lm	ll
Marker34614	<efxeg>	--	--	ee	ef	eg	eg	ee	ee	ee	ee	ee	eg	eg	ee	eg	ef	ef	eg	--	ee	ee	--	eg	eg	eg	ee	eg	--	ee	ee	ee	ef	--	ee	ee	--	eg	--	eg	ef	--	ee	ee	--	ee	ee	eg	--
Marker41538	<lmxll>	ll	ll	ll	ll	lm	lm	lm	ll	lm	lm	lm	ll	lm	ll	lm	ll	ll	lm	ll	ll	lm	ll	lm	lm	ll	ll	ll	ll	lm	lm	lm	lm	lm	lm	ll	ll	lm	ll	lm	lm	lm	lm	ll	ll	ll	ll	lm	lm
Marker50812	<nnxnp>	nn	np	nn	nn	np	np	nn	np	nn	nn	nn	np	np	nn	np	nn	nn	np	np	nn	nn	np	np	np	np	nn	np	nn	nn	nn	np	np	nn	nn	nn	np	np	nn	nn	nn	np	np	np	nn	nn	np	np	nn
Marker49385	<nnxnp>	nn	np	nn	nn	np	np	nn	np	nn	nn	nn	np	np	nn	np	nn	nn	np	np	nn	nn	np	np	np	np	nn	np	nn	nn	nn	np	np	nn	nn	nn	np	np	nn	nn	nn	np	np	np	nn	nn	np	np	nn
Marker49639	<nnxnp>	nn	np	nn	nn	np	np	nn	np	nn	nn	nn	np	np	nn	np	nn	nn	np	np	nn	nn	np	np	np	np	nn	np	nn	nn	nn	np	np	nn	nn	nn	np	np	nn	nn	nn	np	np	np	nn	nn	np	np	nn
Marker47016	<nnxnp>	nn	np	nn	nn	np	np	nn	np	nn	nn	nn	np	np	nn	np	nn	nn	np	np	nn	nn	np	np	np	np	nn	np	nn	nn	nn	np	np	nn	nn	nn	np	np	nn	nn	nn	np	np	np	nn	nn	np	np	nn
Marker34911	<lmxll>	lm	lm	ll	lm	lm	lm	lm	lm	lm	lm	lm	ll	lm	ll	lm	ll	ll	lm	ll	ll	lm	ll	lm	lm	ll	ll	ll	lm	lm	lm	ll	ll	lm	ll	ll	ll	lm	ll	lm	lm	lm	ll	ll	ll	ll	ll	lm	ll
Marker11594	<nnxnp>	nn	np	nn	nn	np	np	nn	nn	nn	nn	nn	np	np	nn	np	nn	nn	np	np	nn	nn	np	np	nn	np	nn	np	nn	nn	nn	nn	nn	nn	nn	nn	np	np	nn	np	nn	np	nn	np	nn	nn	np	np	nn
Marker11710	<lmxll>	ll	ll	lm	ll	ll	ll	ll	ll	ll	ll	ll	lm	ll	lm	ll	ll	ll	ll	lm	lm	ll	lm	ll	ll	ll	lm	lm	ll	ll	ll	lm	ll	ll	lm	lm	lm	ll	ll	ll	ll	ll	lm	ll	ll	lm	lm	ll	ll
Marker3990	<nnxnp>	nn	np	nn	nn	np	np	nn	np	nn	nn	nn	np	np	nn	np	nn	nn	np	np	nn	nn	np	np	nn	np	np	np	nn	nn	nn	np	nn	nn	nn	np	np	np	nn	nn	nn	np	np	np	nn	nn	np	np	nn
Marker35322	<nnxnp>	nn	np	nn	nn	np	np	nn	nn	nn	nn	nn	np	np	nn	np	nn	nn	np	np	nn	nn	np	np	nn	np	np	np	nn	nn	nn	np	nn	nn	nn	nn	np	np	nn	nn	nn	np	np	np	nn	nn	np	np	nn
Marker29570	<nnxnp>	nn	np	nn	nn	np	np	nn	nn	nn	nn	nn	np	np	nn	np	nn	nn	np	np	nn	nn	np	np	nn	np	nn	np	nn	nn	nn	np	nn	nn	nn	nn	np	np	nn	nn	nn	np	np	np	nn	nn	np	np	nn
Marker9096	<nnxnp>	nn	np	nn	nn	np	np	nn	nn	nn	nn	nn	np	np	nn	np	nn	nn	np	np	nn	nn	np	np	nn	np	nn	np	nn	nn	nn	nn	nn	nn	nn	nn	np	np	nn	np	nn	np	nn	nn	nn	nn	nn	np	nn
Marker18957	<nnxnp>	nn	np	nn	nn	np	np	nn	nn	nn	nn	nn	np	np	nn	np	nn	nn	np	np	nn	nn	np	np	nn	np	nn	np	nn	nn	nn	np	nn	nn	nn	nn	np	np	nn	nn	nn	np	np	np	nn	nn	nn	nn	nn
Marker18691	<lmxll>	ll	ll	lm	lm	lm	ll	lm	ll	lm	ll	ll	lm	ll	lm	lm	lm	ll	ll	lm	ll	lm	ll	lm	lm	ll	ll	lm	ll	lm	ll	lm	ll	lm	lm	ll	ll	ll	ll	lm	lm	ll	ll	lm	ll	ll	lm	ll	lm
Marker18690	<lmxll>	ll	ll	lm	lm	lm	ll	lm	ll	lm	ll	ll	lm	ll	lm	lm	lm	ll	ll	lm	ll	lm	ll	lm	lm	ll	ll	lm	ll	lm	ll	lm	ll	lm	lm	ll	ll	ll	ll	lm	lm	ll	ll	lm	ll	ll	lm	ll	lm
Marker32188	<nnxnp>	np	nn	np	np	nn	nn	np	np	np	np	np	nn	nn	np	nn	np	np	nn	nn	np	np	nn	nn	np	nn	np	nn	np	np	np	nn	np	np	np	np	nn	nn	np	np	np	nn	nn	nn	np	np	np	np	np
Marker3721	<nnxnp>	nn	np	nn	nn	np	np	nn	nn	nn	nn	nn	np	np	nn	np	nn	nn	np	np	nn	nn	np	np	nn	np	nn	np	nn	nn	nn	np	nn	nn	nn	nn	np	np	nn	nn	nn	np	np	np	nn	nn	nn	nn	nn
Marker28690	<nnxnp>	nn	np	nn	nn	np	np	nn	nn	nn	nn	nn	np	np	nn	np	nn	nn	np	np	nn	nn	np	np	nn	np	nn	np	nn	nn	nn	np	nn	nn	nn	nn	np	np	nn	nn	nn	np	np	np	nn	nn	nn	np	nn
Marker33266	<efxeg>	ee	eg	ef	ee	eg	ef	ee	ee	ee	eg	ee	--	eg	--	ee	--	ee	eg	--	fg	ee	fg	eg	ee	eg	fg	ef	eg	ee	--	--	ee	eg	ef	--	fg	eg	--	eg	eg	--	ef	eg	ef	ee	--	eg	--
Marker15291	<nnxnp>	np	nn	np	np	nn	nn	np	np	np	np	np	nn	nn	np	nn	np	np	nn	nn	np	nn	nn	nn	np	nn	np	nn	np	np	np	nn	np	np	np	np	nn	nn	np	np	np	nn	nn	nn	np	np	nn	nn	nn
Marker9859	<nnxnp>	np	nn	np	np	nn	nn	np	np	np	np	np	nn	nn	np	nn	np	np	nn	nn	np	nn	nn	nn	np	nn	np	nn	np	np	np	nn	np	np	np	np	nn	nn	np	np	np	nn	nn	np	np	np	nn	nn	nn
Marker18692	<nnxnp>	np	nn	np	np	nn	nn	np	np	np	np	np	nn	nn	np	nn	np	np	nn	nn	np	nn	nn	nn	np	nn	np	nn	np	np	np	nn	np	np	np	np	nn	nn	np	np	np	nn	nn	np	np	np	nn	nn	np
Marker19157	<lmxll>	ll	ll	lm	ll	ll	ll	ll	ll	ll	ll	ll	lm	ll	lm	ll	lm	lm	ll	lm	lm	ll	lm	ll	ll	ll	lm	lm	ll	ll	ll	lm	ll	ll	lm	lm	lm	ll	lm	ll	ll	ll	lm	lm	lm	lm	lm	ll	lm
Marker30635	<nnxnp>	np	nn	np	np	nn	nn	np	np	np	nn	np	nn	nn	nn	np	nn	np	nn	nn	nn	np	nn	nn	nn	nn	nn	np	np	np	np	nn	np	nn	np	nn	nn	nn	np	np	nn	nn	np	nn	np	np	nn	nn	np
Marker49056	<nnxnp>	np	nn	np	np	nn	nn	np	np	np	nn	np	nn	nn	nn	np	nn	np	nn	nn	nn	np	nn	nn	nn	nn	nn	np	np	np	np	nn	np	nn	np	nn	nn	nn	np	np	nn	nn	np	nn	np	np	nn	nn	np
Marker41508	<nnxnp>	np	nn	np	np	nn	nn	np	np	np	nn	np	nn	nn	nn	np	nn	np	nn	nn	nn	np	nn	nn	nn	nn	nn	np	np	nn	np	nn	np	nn	np	nn	nn	nn	np	np	nn	nn	np	nn	np	nn	nn	nn	np
Marker907	<lmxll>	ll	ll	lm	ll	ll	ll	ll	ll	ll	ll	ll	lm	ll	lm	ll	lm	ll	ll	lm	lm	ll	lm	ll	ll	ll	lm	lm	ll	ll	ll	lm	ll	ll	lm	lm	lm	ll	ll	ll	ll	ll	lm	ll	ll	lm	lm	ll	lm
Marker41507	<lmxll>	lm	lm	ll	lm	lm	lm	lm	lm	lm	lm	lm	ll	lm	ll	lm	ll	ll	lm	ll	ll	lm	ll	lm	lm	lm	ll	ll	lm	lm	lm	ll	lm	lm	ll	ll	ll	lm	ll	lm	lm	lm	ll	lm	ll	ll	ll	lm	ll
Marker33151	<lmxll>	ll	ll	lm	ll	lm	ll	lm	ll	ll	lm	lm	ll	lm	lm	lm	ll	ll	lm	lm	ll	lm	ll	lm	lm	ll	ll	ll	ll	lm	ll	lm	ll	ll	lm	ll	ll	lm	ll	ll	ll	lm	ll	ll	ll	ll	lm	lm	lm
Marker10740	<nnxnp>	np	nn	nn	np	nn	nn	np	nn	np	np	np	nn	nn	np	nn	np	np	nn	nn	np	nn	nn	nn	np	nn	np	nn	np	np	np	nn	nn	np	np	np	nn	nn	np	np	np	nn	nn	np	np	np	nn	nn	np
Marker392	<nnxnp>	np	np	nn	nn	np	np	nn	nn	nn	nn	nn	np	np	nn	np	nn	nn	np	np	nn	nn	np	np	nn	np	nn	np	nn	nn	nn	nn	nn	nn	nn	nn	np	np	nn	np	nn	np	np	nn	nn	nn	nn	np	np
Marker9838	<nnxnp>	np	nn	np	np	nn	nn	np	np	np	np	np	nn	nn	np	nn	np	np	nn	nn	np	nn	nn	nn	np	nn	np	nn	np	np	np	nn	np	np	np	np	nn	nn	np	np	np	nn	nn	np	np	np	np	np	nn
Marker43898	<nnxnp>	nn	nn	nn	np	nn	nn	np	nn	np	np	np	nn	nn	np	nn	np	np	nn	nn	np	nn	nn	nn	np	nn	np	nn	np	np	np	nn	np	np	np	np	nn	nn	np	np	np	nn	nn	np	np	np	nn	nn	np
Marker18603	<lmxll>	ll	ll	lm	ll	ll	ll	ll	ll	ll	ll	ll	lm	ll	lm	ll	lm	ll	ll	lm	lm	ll	lm	ll	lm	ll	lm	lm	ll	ll	ll	lm	lm	ll	lm	lm	lm	ll	lm	ll	ll	ll	lm	ll	lm	lm	lm	ll	lm
Marker37727	<lmxll>	lm	lm	ll	lm	ll	lm	ll	lm	lm	ll	ll	lm	ll	ll	ll	lm	lm	ll	ll	lm	ll	lm	ll	ll	lm	lm	lm	lm	ll	lm	ll	lm	lm	ll	lm	lm	ll	lm	ll	lm	ll	lm	lm	lm	lm	ll	ll	ll
Marker16945	<efxeg>	ee	eg	ef	ee	eg	eg	ee	ee	ee	eg	ee	--	eg	--	ee	fg	ee	eg	--	fg	ee	--	eg	eg	eg	fg	ef	eg	ee	ee	--	ef	eg	ef	--	fg	eg	ef	ee	eg	eg	ef	eg	ef	ef	fg	eg	ef
Marker40834	<lmxll>	ll	ll	lm	ll	ll	ll	ll	ll	ll	ll	ll	lm	ll	lm	ll	lm	ll	ll	lm	lm	ll	lm	ll	ll	ll	lm	lm	ll	ll	ll	ll	lm	ll	lm	lm	lm	ll	lm	ll	ll	ll	lm	ll	lm	lm	ll	ll	lm
Marker33280	<nnxnp>	np	nn	np	np	nn	nn	np	np	np	nn	np	nn	nn	nn	np	nn	np	nn	nn	nn	np	nn	nn	nn	nn	nn	np	nn	np	np	nn	np	nn	np	nn	nn	nn	np	np	nn	nn	np	nn	np	np	nn	nn	np
Marker10651	<nnxnp>	nn	nn	nn	np	nn	nn	np	nn	np	np	np	nn	nn	np	nn	np	np	nn	nn	np	nn	nn	nn	np	nn	np	nn	np	np	np	nn	np	np	np	np	nn	nn	np	np	np	nn	nn	np	np	np	nn	nn	nn
Marker5731	<lmxll>	ll	ll	lm	ll	ll	ll	ll	ll	ll	ll	ll	lm	ll	lm	ll	lm	ll	ll	lm	lm	ll	lm	ll	ll	ll	lm	lm	ll	ll	ll	ll	lm	ll	lm	lm	lm	ll	lm	ll	ll	ll	lm	ll	lm	lm	lm	ll	lm
Marker10430	<efxeg>	ef	fg	--	ef	fg	fg	ef	ef	ef	fg	ef	eg	fg	eg	ef	eg	ef	--	eg	eg	ef	eg	--	--	fg	eg	ee	ef	ef	ef	--	ee	--	ee	eg	eg	fg	ee	ef	fg	fg	ee	fg	ee	ee	eg	fg	ee
Marker36916	<lmxll>	ll	ll	lm	ll	lm	lm	lm	ll	lm	ll	ll	lm	ll	lm	lm	lm	ll	ll	lm	ll	lm	ll	lm	lm	ll	ll	ll	ll	lm	ll	lm	ll	ll	lm	ll	ll	ll	ll	lm	ll	ll	ll	lm	ll	ll	lm	ll	lm
Marker10830	<lmxll>	ll	ll	lm	ll	ll	ll	ll	ll	ll	ll	ll	lm	ll	lm	ll	lm	ll	ll	lm	lm	ll	lm	ll	ll	ll	lm	lm	ll	ll	ll	ll	lm	ll	lm	lm	lm	ll	lm	ll	ll	ll	lm	ll	lm	lm	lm	ll	lm
Marker6311	<nnxnp>	np	np	np	nn	np	np	nn	np	nn	nn	nn	np	np	nn	np	nn	nn	np	np	nn	np	np	np	nn	np	nn	np	nn	nn	nn	np	nn	nn	nn	nn	nn	np	nn	nn	nn	np	np	nn	nn	nn	nn	np	np
Marker22504	<lmxll>	lm	lm	ll	lm	lm	lm	lm	lm	lm	lm	lm	ll	lm	ll	lm	ll	lm	lm	ll	ll	lm	ll	lm	lm	lm	ll	ll	lm	lm	lm	lm	ll	lm	ll	ll	ll	lm	ll	lm	lm	lm	ll	lm	ll	ll	ll	lm	ll
Marker7222	<nnxnp>	nn	np	nn	nn	np	np	nn	nn	nn	np	nn	np	np	np	nn	np	nn	np	np	np	nn	np	np	nn	np	np	nn	np	nn	nn	np	nn	np	nn	np	np	np	nn	nn	np	np	nn	np	nn	nn	np	np	nn
Marker24448	<nnxnp>	nn	nn	nn	np	nn	nn	np	nn	np	np	np	nn	nn	np	nn	np	np	nn	nn	np	nn	nn	nn	np	nn	np	nn	np	np	np	nn	np	np	np	np	np	nn	np	np	np	np	nn	np	np	np	np	nn	nn
Marker5715	<lmxll>	lm	lm	ll	lm	lm	lm	lm	lm	lm	lm	lm	ll	lm	ll	lm	ll	lm	lm	ll	ll	lm	ll	lm	lm	lm	ll	ll	lm	lm	lm	ll	ll	lm	ll	ll	ll	lm	ll	lm	lm	lm	ll	lm	ll	ll	ll	lm	ll
Marker39292	<lmxll>	lm	lm	ll	lm	ll	lm	ll	lm	lm	ll	lm	lm	lm	ll	ll	ll	lm	ll	ll	lm	ll	lm	ll	ll	lm	lm	lm	lm	ll	lm	ll	ll	lm	lm	lm	lm	ll	lm	ll	lm	ll	lm	lm	lm	lm	ll	ll	ll
Marker33852	<nnxnp>	nn	np	nn	nn	np	np	nn	nn	nn	np	nn	nn	np	np	nn	np	nn	np	np	np	nn	np	np	np	np	np	nn	np	nn	nn	nn	nn	np	nn	np	np	np	nn	np	np	np	nn	np	nn	nn	np	np	nn
Marker9591	<nnxnp>	nn	np	nn	nn	np	nn	nn	nn	nn	np	nn	np	np	np	nn	np	nn	np	np	np	nn	np	np	nn	np	np	nn	np	nn	nn	nn	nn	np	nn	np	np	np	nn	nn	np	np	nn	np	nn	nn	np	np	nn
Marker38843	<nnxnp>	nn	nn	nn	np	np	nn	nn	nn	np	np	np	nn	nn	np	nn	np	np	nn	nn	nn	nn	nn	np	np	nn	np	nn	np	np	np	nn	np	np	nn	np	nn	nn	np	nn	np	nn	nn	np	nn	nn	np	np	nn
Marker3093	<lmxll>	ll	ll	lm	ll	lm	ll	lm	ll	lm	lm	ll	ll	ll	lm	lm	ll	ll	lm	lm	ll	lm	ll	lm	lm	ll	ll	ll	ll	lm	ll	lm	lm	ll	lm	ll	ll	lm	ll	lm	ll	lm	ll	ll	ll	ll	lm	lm	lm
Marker33764	<lmxll>	ll	ll	lm	ll	lm	ll	lm	ll	lm	lm	ll	ll	ll	lm	lm	ll	ll	lm	lm	ll	lm	ll	lm	lm	ll	ll	ll	ll	lm	ll	lm	lm	ll	lm	ll	ll	lm	ll	lm	ll	lm	ll	ll	ll	ll	lm	lm	lm
Marker42339	<lmxll>	lm	lm	ll	lm	ll	lm	ll	lm	ll	ll	lm	lm	lm	ll	ll	lm	lm	ll	ll	lm	ll	lm	ll	ll	lm	lm	lm	lm	ll	lm	ll	ll	lm	ll	lm	lm	ll	lm	ll	lm	ll	lm	lm	lm	lm	ll	ll	ll
Marker32250	<lmxll>	lm	lm	ll	lm	ll	lm	ll	lm	lm	ll	lm	lm	lm	ll	ll	lm	lm	ll	ll	lm	ll	lm	ll	ll	lm	lm	lm	lm	ll	lm	ll	ll	lm	ll	lm	lm	ll	lm	ll	lm	ll	lm	lm	lm	lm	ll	ll	ll
Marker9269	<nnxnp>	nn	nn	nn	np	np	nn	np	nn	np	np	np	nn	nn	np	nn	np	np	nn	nn	nn	nn	nn	np	nn	nn	np	nn	np	np	np	nn	np	np	nn	np	nn	nn	np	nn	np	nn	nn	nn	nn	nn	nn	nn	nn
Marker3700	<lmxll>	lm	lm	ll	lm	ll	lm	ll	lm	ll	ll	lm	lm	lm	ll	ll	lm	lm	ll	ll	lm	ll	lm	ll	ll	lm	lm	lm	lm	ll	lm	ll	ll	lm	ll	lm	lm	ll	lm	ll	lm	ll	lm	ll	lm	lm	ll	ll	ll
Marker34627	<nnxnp>	nn	nn	nn	np	nn	nn	np	nn	np	np	np	nn	nn	np	nn	np	np	nn	nn	np	nn	nn	np	np	nn	np	nn	np	nn	np	nn	np	np	np	np	nn	nn	np	np	np	nn	nn	np	np	np	np	nn	nn
Marker43165	<lmxll>	ll	ll	lm	ll	lm	ll	lm	ll	lm	lm	ll	lm	ll	lm	lm	lm	ll	lm	lm	ll	lm	ll	lm	lm	ll	ll	ll	ll	lm	ll	ll	lm	ll	lm	ll	ll	lm	ll	ll	ll	lm	ll	lm	ll	ll	ll	ll	lm
Marker7231	<lmxll>	ll	ll	lm	ll	ll	ll	ll	ll	lm	ll	ll	lm	ll	lm	ll	lm	ll	ll	lm	lm	ll	lm	ll	lm	ll	lm	lm	ll	ll	ll	lm	lm	ll	lm	lm	lm	ll	lm	ll	ll	ll	lm	ll	lm	lm	lm	ll	lm
Marker13839	<nnxnp>	nn	np	nn	nn	np	np	nn	nn	nn	np	nn	nn	np	np	nn	np	nn	np	np	np	nn	np	np	np	np	np	nn	np	nn	nn	nn	np	np	nn	np	np	np	nn	np	np	np	nn	np	nn	nn	np	np	np
Marker17665	<nnxnp>	np	nn	np	np	nn	nn	np	np	np	nn	np	np	nn	nn	np	nn	np	nn	nn	nn	np	nn	nn	nn	nn	nn	np	nn	np	np	np	nn	nn	np	nn	nn	nn	np	nn	nn	nn	np	nn	np	np	nn	nn	nn
Marker51726	<nnxnp>	nn	nn	nn	np	np	nn	np	nn	np	np	np	nn	nn	np	nn	np	np	nn	nn	np	nn	nn	nn	np	nn	np	nn	np	np	np	nn	np	np	np	np	np	nn	np	np	np	np	nn	np	np	np	np	nn	nn
Marker35944	<lmxll>	lm	lm	ll	lm	ll	lm	ll	lm	ll	ll	lm	ll	lm	ll	ll	ll	lm	lm	ll	lm	ll	lm	ll	ll	lm	lm	lm	lm	ll	lm	ll	ll	lm	ll	lm	lm	ll	lm	lm	lm	ll	ll	ll	lm	lm	lm	lm	ll
Marker7253	<nnxnp>	np	nn	np	np	nn	nn	np	np	np	nn	np	np	nn	nn	np	nn	np	nn	nn	nn	np	nn	nn	nn	nn	nn	np	nn	np	np	np	nn	nn	np	nn	nn	nn	np	nn	nn	nn	np	nn	nn	np	nn	nn	nn
Marker20608	<lmxll>	ll	ll	lm	ll	lm	ll	lm	ll	lm	lm	ll	lm	ll	lm	lm	lm	ll	ll	lm	ll	lm	ll	lm	lm	ll	ll	ll	ll	lm	ll	lm	lm	ll	lm	ll	ll	lm	ll	ll	ll	ll	lm	lm	ll	ll	lm	lm	lm
Marker36008	<efxeg>	--	eg	fg	ee	ef	--	ef	--	--	ef	ee	fg	ee	ef	--	--	ee	eg	fg	ee	fg	--	ef	ef	eg	ee	eg	ee	ef	ee	fg	ef	ee	ef	ee	eg	fg	ee	ef	ee	--	fg	ef	ee	ee	--	ef	fg
Marker32772	<lmxll>	lm	lm	ll	lm	ll	lm	ll	lm	lm	ll	lm	ll	lm	ll	ll	ll	lm	lm	ll	lm	ll	lm	ll	ll	lm	lm	lm	lm	ll	lm	ll	ll	lm	lm	ll	lm	ll	lm	ll	lm	ll	ll	ll	ll	lm	ll	ll	ll
Marker22501	<nnxnp>	nn	np	nn	nn	np	np	nn	nn	nn	np	nn	nn	np	np	nn	np	nn	np	np	np	nn	np	np	np	np	np	nn	np	nn	nn	nn	np	np	nn	np	np	np	nn	np	np	np	nn	np	np	nn	np	np	np
Marker3676	<lmxll>	lm	lm	ll	lm	ll	lm	ll	lm	lm	ll	lm	ll	lm	ll	ll	ll	lm	ll	ll	lm	ll	lm	ll	ll	lm	lm	lm	lm	ll	lm	ll	ll	lm	lm	ll	lm	ll	lm	ll	lm	ll	ll	ll	ll	lm	ll	ll	ll
Marker16345	<nnxnp>	nn	nn	nn	np	np	nn	np	nn	np	np	np	nn	np	np	nn	np	np	nn	nn	np	nn	nn	np	np	nn	np	nn	np	np	np	nn	np	np	np	np	nn	nn	np	np	np	np	nn	np	np	np	np	np	nn
Marker6092	<nnxnp>	nn	nn	nn	np	np	nn	np	nn	np	np	np	nn	np	np	nn	np	np	nn	nn	np	nn	nn	np	np	nn	np	nn	np	np	np	nn	np	np	np	np	nn	nn	np	np	np	np	nn	np	np	np	np	np	nn
Marker206	<lmxll>	ll	ll	lm	ll	lm	ll	lm	ll	ll	lm	ll	lm	ll	lm	lm	lm	ll	lm	lm	ll	lm	ll	lm	lm	ll	ll	ll	ll	lm	ll	lm	lm	ll	ll	lm	ll	lm	ll	lm	ll	lm	lm	lm	lm	ll	lm	lm	lm
Marker13557	<nnxnp>	np	nn	np	np	nn	nn	np	np	np	nn	np	np	nn	nn	np	nn	np	nn	nn	nn	np	nn	nn	nn	nn	nn	np	nn	np	np	np	nn	nn	np	nn	nn	nn	np	nn	nn	nn	np	nn	nn	np	nn	nn	nn
Marker31652	<lmxll>	lm	lm	ll	lm	ll	lm	ll	lm	lm	ll	lm	ll	lm	ll	ll	ll	lm	lm	ll	lm	ll	lm	ll	ll	lm	lm	lm	lm	ll	lm	ll	ll	lm	lm	ll	lm	ll	lm	ll	lm	ll	ll	ll	lm	lm	ll	ll	ll
Marker16514	<nnxnp>	nn	nn	nn	np	np	nn	np	nn	np	np	np	nn	np	np	nn	np	np	nn	nn	np	nn	nn	np	np	nn	np	nn	np	np	np	nn	np	np	np	np	nn	nn	np	np	np	np	nn	np	np	np	np	np	nn
Marker43167	<lmxll>	lm	lm	ll	lm	ll	lm	ll	lm	lm	ll	lm	ll	lm	ll	ll	ll	lm	ll	ll	lm	ll	lm	ll	ll	lm	lm	lm	lm	ll	lm	ll	ll	lm	ll	lm	lm	ll	lm	ll	lm	ll	lm	ll	lm	lm	ll	ll	ll
Marker61107	<nnxnp>	np	np	np	nn	nn	np	nn	np	nn	nn	nn	np	nn	nn	np	nn	nn	np	np	nn	np	np	nn	nn	np	nn	np	nn	nn	nn	np	nn	nn	nn	nn	np	np	nn	nn	nn	np	np	nn	nn	nn	nn	nn	np
Marker40482	<lmxll>	lm	lm	ll	lm	ll	lm	ll	lm	lm	ll	lm	ll	lm	ll	ll	ll	lm	lm	ll	lm	ll	lm	ll	ll	lm	lm	lm	lm	ll	lm	ll	ll	lm	lm	ll	lm	ll	lm	ll	lm	ll	ll	ll	lm	lm	ll	ll	ll
Marker17650	<nnxnp>	nn	nn	nn	np	np	nn	np	nn	np	np	np	nn	nn	np	nn	np	np	nn	nn	np	nn	nn	np	np	nn	np	nn	np	np	np	nn	np	np	np	np	nn	nn	np	np	np	nn	nn	np	np	np	np	np	nn
Marker18698	<lmxll>	ll	ll	lm	ll	lm	ll	lm	ll	ll	lm	ll	lm	ll	lm	lm	lm	ll	ll	lm	ll	lm	ll	lm	lm	ll	ll	ll	ll	lm	ll	lm	lm	ll	lm	ll	ll	lm	ll	lm	ll	ll	lm	lm	ll	ll	lm	lm	lm
Marker29802	<nnxnp>	np	nn	np	np	nn	nn	np	np	np	nn	np	np	nn	nn	np	nn	np	nn	nn	nn	np	nn	nn	nn	nn	nn	np	nn	np	np	np	nn	nn	np	nn	nn	nn	np	nn	nn	nn	np	nn	nn	np	nn	nn	nn
Marker27661	<lmxll>	lm	lm	ll	lm	ll	lm	ll	lm	lm	ll	lm	ll	lm	ll	ll	ll	lm	lm	ll	lm	ll	lm	ll	ll	lm	lm	lm	lm	ll	lm	ll	ll	lm	ll	lm	lm	ll	lm	ll	lm	lm	ll	ll	lm	lm	ll	ll	ll
Marker31656	<nnxnp>	np	np	np	nn	nn	np	nn	np	nn	nn	nn	np	np	nn	np	nn	nn	np	np	nn	np	np	nn	nn	np	nn	np	nn	nn	nn	np	nn	nn	nn	nn	np	np	nn	np	nn	np	np	nn	nn	nn	nn	nn	np
Marker7198	<lmxll>	ll	ll	lm	ll	lm	ll	lm	ll	ll	lm	ll	lm	ll	lm	lm	lm	ll	ll	lm	ll	lm	ll	lm	lm	ll	ll	ll	ll	lm	ll	lm	lm	ll	lm	ll	ll	lm	ll	lm	ll	lm	lm	lm	ll	ll	lm	lm	lm
Marker12971	<lmxll>	ll	ll	lm	ll	lm	ll	lm	ll	lm	lm	ll	lm	ll	lm	lm	lm	ll	ll	lm	ll	lm	ll	lm	lm	ll	ll	ll	ll	lm	ll	lm	lm	ll	lm	ll	ll	lm	ll	lm	ll	lm	lm	lm	ll	ll	lm	lm	lm
Marker43063	<nnxnp>	np	np	np	nn	nn	np	nn	np	nn	nn	nn	np	nn	nn	np	nn	nn	np	np	nn	np	np	nn	nn	np	nn	np	nn	nn	nn	np	nn	nn	nn	nn	np	np	nn	nn	nn	np	np	nn	nn	nn	nn	nn	np
Marker8240	<lmxll>	lm	lm	ll	lm	ll	lm	ll	lm	lm	ll	lm	ll	lm	ll	ll	ll	lm	ll	ll	lm	ll	lm	ll	ll	lm	lm	lm	lm	ll	lm	ll	ll	lm	ll	lm	lm	ll	lm	ll	lm	ll	lm	ll	lm	lm	ll	ll	ll
Marker28684	<lmxll>	lm	lm	ll	lm	ll	lm	ll	lm	lm	ll	lm	ll	lm	ll	ll	ll	lm	ll	ll	lm	ll	lm	ll	ll	lm	lm	lm	lm	ll	lm	ll	ll	lm	ll	lm	lm	ll	lm	ll	lm	ll	ll	ll	lm	lm	ll	ll	ll
Marker16513	<lmxll>	ll	ll	lm	ll	lm	ll	lm	ll	lm	lm	ll	lm	ll	lm	lm	lm	ll	ll	lm	ll	lm	ll	lm	lm	ll	ll	ll	ll	lm	ll	lm	lm	ll	lm	ll	ll	lm	ll	lm	ll	lm	lm	lm	ll	ll	lm	lm	lm
Marker15280	<lmxll>	ll	ll	lm	ll	lm	ll	lm	ll	ll	lm	ll	lm	ll	lm	lm	lm	ll	ll	lm	ll	lm	ll	lm	lm	ll	ll	ll	ll	lm	ll	ll	lm	ll	lm	ll	ll	lm	ll	lm	ll	lm	ll	lm	ll	ll	lm	lm	lm
Marker43306	<lmxll>	ll	ll	lm	ll	lm	ll	lm	ll	lm	lm	ll	lm	ll	lm	lm	lm	ll	ll	lm	ll	lm	ll	lm	lm	ll	ll	ll	lm	lm	ll	ll	lm	ll	lm	ll	ll	lm	ll	lm	ll	lm	ll	lm	ll	ll	lm	lm	lm
Marker34416	<nnxnp>	nn	nn	nn	np	nn	nn	np	nn	np	np	np	nn	nn	np	nn	np	np	nn	nn	np	nn	np	nn	np	nn	np	nn	np	nn	np	nn	np	np	np	np	nn	nn	np	np	np	nn	nn	np	np	np	np	nn	nn
Marker33655	<lmxll>	ll	ll	lm	ll	lm	ll	lm	ll	lm	lm	ll	lm	ll	lm	lm	lm	ll	ll	lm	ll	lm	ll	lm	lm	ll	ll	ll	lm	lm	ll	ll	lm	ll	lm	ll	ll	lm	ll	lm	ll	lm	ll	lm	ll	ll	lm	lm	lm
Marker29791	<nnxnp>	np	nn	np	np	nn	nn	np	np	np	nn	np	np	nn	nn	np	nn	np	nn	nn	nn	np	nn	nn	nn	nn	nn	np	nn	np	np	np	nn	nn	np	nn	nn	nn	np	nn	nn	nn	np	nn	nn	np	nn	nn	nn
Marker40419	<lmxll>	ll	ll	lm	ll	lm	ll	lm	ll	lm	lm	ll	lm	ll	lm	lm	lm	ll	ll	lm	ll	lm	ll	lm	lm	ll	ll	ll	ll	lm	ll	ll	lm	ll	lm	ll	ll	lm	ll	lm	ll	lm	ll	lm	ll	ll	lm	lm	lm
Marker34151	<lmxll>	ll	ll	lm	ll	lm	ll	lm	lm	lm	lm	ll	lm	ll	lm	lm	lm	ll	ll	lm	ll	lm	ll	lm	lm	ll	ll	ll	ll	lm	ll	lm	lm	ll	lm	ll	ll	lm	ll	lm	ll	lm	ll	lm	ll	ll	lm	lm	lm
Marker35050	<lmxll>	ll	ll	lm	ll	lm	ll	lm	lm	lm	lm	ll	lm	ll	lm	lm	lm	ll	ll	lm	ll	lm	ll	lm	lm	ll	ll	ll	ll	lm	ll	lm	lm	ll	lm	ll	ll	lm	ll	lm	ll	lm	ll	lm	ll	ll	lm	lm	lm
Marker15846	<lmxll>	lm	lm	ll	lm	ll	lm	ll	ll	ll	ll	lm	ll	lm	ll	ll	ll	lm	lm	ll	lm	ll	lm	ll	ll	lm	lm	lm	lm	ll	lm	ll	ll	lm	ll	lm	lm	ll	lm	ll	lm	ll	lm	ll	lm	lm	ll	ll	ll
Marker19149	<nnxnp>	nn	nn	nn	np	np	nn	np	nn	np	np	np	nn	nn	np	nn	nn	np	nn	nn	np	nn	nn	nn	np	nn	np	nn	np	np	np	nn	np	np	np	np	nn	nn	np	np	np	nn	nn	np	np	np	np	nn	nn
Marker3743	<lmxll>	ll	ll	lm	ll	lm	ll	lm	ll	ll	lm	ll	lm	ll	lm	lm	lm	ll	lm	lm	ll	lm	ll	lm	lm	ll	ll	ll	ll	lm	ll	lm	lm	ll	lm	ll	ll	lm	ll	lm	ll	lm	ll	lm	ll	lm	lm	lm	lm
Marker18955	<lmxll>	ll	ll	lm	ll	lm	ll	lm	ll	ll	lm	ll	lm	ll	lm	lm	lm	ll	lm	lm	ll	lm	ll	lm	lm	ll	ll	ll	ll	lm	ll	lm	lm	ll	lm	ll	ll	lm	ll	lm	ll	lm	ll	lm	ll	lm	lm	lm	lm
Marker25342	<lmxll>	ll	ll	lm	ll	lm	ll	lm	ll	lm	lm	ll	lm	ll	lm	lm	lm	ll	ll	lm	ll	lm	ll	lm	lm	ll	ll	ll	lm	lm	ll	ll	lm	ll	lm	ll	ll	lm	ll	lm	ll	lm	ll	lm	ll	ll	lm	lm	lm
Marker10155	<nnxnp>	nn	nn	nn	np	np	nn	np	nn	np	np	np	nn	nn	np	nn	nn	np	nn	nn	np	nn	nn	np	np	nn	np	nn	np	np	np	nn	np	np	np	np	nn	nn	np	nn	np	nn	nn	np	np	np	np	np	nn
Marker3346	<lmxll>	ll	ll	lm	ll	lm	ll	lm	ll	lm	lm	ll	lm	ll	lm	lm	lm	ll	ll	lm	ll	lm	ll	lm	lm	ll	ll	ll	ll	lm	ll	ll	lm	ll	lm	ll	ll	lm	ll	lm	ll	lm	ll	lm	ll	ll	lm	lm	lm
Marker40341	<nnxnp>	nn	nn	nn	np	nn	nn	np	nn	np	np	np	nn	nn	np	nn	np	np	nn	nn	np	nn	np	nn	np	nn	np	nn	np	nn	np	nn	np	np	np	np	nn	nn	np	np	np	nn	nn	np	np	np	np	nn	nn
Marker4913	<lmxll>	lm	lm	ll	lm	ll	lm	ll	lm	lm	ll	lm	ll	lm	ll	ll	ll	lm	lm	ll	lm	ll	lm	ll	ll	lm	lm	lm	lm	ll	lm	lm	ll	lm	ll	lm	lm	ll	lm	ll	lm	ll	lm	ll	ll	ll	ll	ll	ll
Marker4914	<lmxll>	lm	lm	ll	lm	ll	lm	ll	lm	lm	ll	lm	ll	lm	ll	ll	ll	lm	lm	ll	lm	ll	lm	ll	ll	lm	lm	lm	lm	ll	lm	lm	ll	lm	ll	lm	lm	ll	lm	ll	lm	ll	lm	ll	ll	ll	ll	ll	ll
Marker40454	<lmxll>	lm	lm	ll	lm	ll	lm	ll	lm	lm	ll	lm	ll	lm	ll	ll	ll	lm	lm	ll	lm	ll	lm	ll	ll	lm	lm	lm	lm	ll	lm	lm	ll	lm	ll	lm	lm	ll	lm	ll	lm	ll	lm	ll	ll	lm	ll	ll	ll
Marker40833	<nnxnp>	np	nn	nn	np	nn	nn	np	nn	np	np	np	np	nn	nn	np	nn	np	nn	nn	nn	nn	nn	nn	nn	nn	nn	np	nn	np	np	np	nn	nn	np	nn	nn	nn	nn	nn	np	nn	np	nn	nn	nn	nn	nn	nn
Marker40453	<efxeg>	fg	fg	eg	ef	ee	--	ef	--	--	ee	ef	eg	ef	ee	eg	ee	ef	fg	eg	ef	eg	fg	ee	ee	fg	ef	fg	--	ee	ef	--	ee	--	ee	--	fg	--	ee	ee	ef	--	--	ee	--	--	--	ee	--
Marker20930	<efxeg>	ef	ef	--	--	eg	ef	eg	ef	--	eg	--	ee	ef	eg	eg	eg	fg	ef	ee	fg	ee	ef	eg	ee	ef	--	ef	--	eg	fg	ee	eg	fg	--	--	--	ee	--	ee	--	--	ee	ee	--	ef	ee	ee	ee
Marker35022	<lmxll>	lm	lm	ll	lm	ll	lm	ll	lm	lm	ll	lm	ll	lm	ll	ll	ll	lm	lm	ll	lm	ll	lm	ll	ll	lm	lm	lm	lm	ll	ll	ll	ll	lm	ll	lm	lm	ll	lm	ll	lm	ll	ll	ll	lm	ll	ll	ll	ll
Marker763	<lmxll>	ll	ll	lm	ll	lm	ll	lm	ll	ll	lm	ll	lm	ll	lm	lm	lm	ll	ll	lm	ll	lm	ll	lm	lm	ll	ll	ll	ll	lm	lm	lm	lm	ll	lm	ll	ll	lm	ll	lm	ll	lm	lm	lm	ll	lm	lm	lm	lm
Marker25095	<lmxll>	ll	lm	lm	ll	lm	ll	ll	lm	ll	ll	ll	lm	lm	lm	lm	lm	lm	lm	lm	lm	ll	lm	lm	ll	lm	lm	lm	lm	ll	lm	lm	lm	lm	lm	lm	lm	lm	lm	ll	lm	lm	lm	lm	lm	lm	lm	lm	lm
Marker19146	<efxeg>	fg	fg	eg	ef	ee	--	ee	--	ee	ee	ef	eg	fg	ee	eg	ee	ef	fg	eg	ef	eg	fg	eg	ee	fg	ef	--	ef	ee	ef	--	ee	ef	ee	ef	--	eg	--	ee	--	--	ee	ee	ee	--	ee	eg	--
Marker37247	<lmxll>	lm	lm	ll	lm	ll	lm	ll	ll	lm	ll	lm	ll	lm	ll	ll	ll	lm	lm	ll	lm	ll	lm	ll	ll	lm	lm	lm	lm	ll	lm	ll	ll	lm	ll	lm	lm	ll	ll	ll	lm	ll	ll	ll	ll	ll	ll	ll	ll
Marker35021	<lmxll>	ll	ll	lm	lm	lm	ll	lm	lm	ll	lm	ll	lm	ll	lm	lm	lm	ll	ll	lm	ll	lm	ll	lm	lm	ll	ll	ll	ll	lm	ll	lm	lm	ll	lm	ll	ll	lm	lm	lm	ll	lm	lm	lm	lm	lm	lm	lm	lm
Marker8710	<lmxll>	lm	lm	ll	ll	ll	lm	ll	ll	lm	ll	lm	ll	lm	ll	ll	ll	lm	lm	ll	lm	ll	lm	ll	ll	lm	lm	lm	lm	ll	lm	ll	ll	lm	ll	lm	lm	ll	ll	ll	lm	ll	ll	ll	ll	ll	ll	ll	ll
Marker21346	<lmxll>	lm	lm	ll	ll	ll	lm	ll	lm	lm	ll	lm	ll	lm	ll	ll	ll	lm	lm	ll	lm	ll	lm	ll	ll	lm	lm	lm	lm	ll	lm	ll	ll	lm	ll	lm	lm	ll	ll	ll	lm	ll	ll	ll	ll	ll	ll	ll	ll
Marker149	<lmxll>	ll	ll	lm	lm	lm	ll	lm	ll	ll	lm	ll	lm	ll	lm	lm	lm	ll	ll	lm	ll	lm	ll	lm	lm	ll	ll	ll	ll	lm	ll	lm	lm	ll	lm	ll	ll	lm	lm	lm	ll	lm	lm	lm	lm	lm	lm	lm	lm
Marker35402	<lmxll>	lm	lm	ll	ll	ll	lm	ll	lm	lm	ll	lm	ll	lm	ll	ll	ll	lm	lm	ll	lm	ll	lm	ll	ll	lm	lm	lm	lm	ll	lm	ll	ll	lm	ll	lm	lm	ll	ll	ll	lm	ll	ll	ll	ll	ll	ll	ll	ll
Marker15843	<lmxll>	ll	ll	lm	ll	lm	ll	lm	ll	ll	lm	ll	lm	ll	lm	lm	lm	ll	ll	lm	ll	lm	ll	lm	lm	ll	ll	ll	ll	lm	ll	lm	lm	ll	lm	ll	ll	lm	ll	lm	ll	lm	lm	lm	ll	lm	lm	lm	lm
Marker7194	<lmxll>	lm	lm	ll	lm	ll	lm	ll	lm	lm	ll	lm	ll	lm	ll	ll	ll	lm	lm	ll	lm	ll	lm	ll	ll	lm	lm	lm	lm	ll	lm	ll	ll	lm	ll	lm	lm	ll	lm	ll	lm	ll	ll	ll	lm	ll	ll	ll	ll
Marker18715	<efxeg>	--	ee	ef	ee	ef	ee	ef	ee	ee	ef	ee	ef	ee	ef	ef	ef	ee	ee	ef	--	ef	ee	ef	--	ee	ee	ee	ee	ef	ee	--	ef	ee	--	ee	ee	ef	ee	ef	ee	ef	ee	ef	ee	ee	ef	ef	ef
Marker352	<nnxnp>	np	nn	np	nn	np	--	--	--	nn	nn	np	np	nn	nn	nn	--	nn	nn	np	np	nn	nn	nn	nn	nn	np	--	nn	np	nn	--	np	nn	nn	np	--	nn	np	nn	np	--	nn	nn	--	nn	np	--	np
Marker19158	<nnxnp>	np	nn	np	nn	np	--	--	--	np	nn	np	np	nn	nn	nn	--	nn	nn	np	np	nn	nn	nn	nn	nn	np	--	nn	np	nn	--	np	nn	nn	np	--	nn	np	nn	np	--	nn	nn	--	nn	np	--	np
Marker485	<nnxnp>	np	nn	np	nn	np	--	--	--	np	nn	np	np	nn	nn	nn	--	nn	nn	np	np	nn	nn	nn	nn	nn	np	--	nn	np	nn	--	np	nn	nn	np	--	nn	np	nn	np	--	nn	nn	--	nn	np	--	np
Marker439	<nnxnp>	np	nn	np	nn	np	--	--	--	np	nn	np	np	nn	nn	nn	--	nn	nn	np	np	nn	nn	nn	nn	nn	np	--	nn	np	nn	--	np	nn	nn	np	--	nn	np	nn	np	--	nn	nn	--	nn	np	--	np
Marker38061	<nnxnp>	np	nn	np	nn	np	--	--	--	np	nn	np	np	nn	nn	nn	--	nn	nn	np	np	nn	nn	nn	nn	nn	np	--	nn	np	nn	--	np	nn	nn	np	--	nn	np	nn	np	--	nn	nn	--	nn	np	--	np
Marker10575	<nnxnp>	np	nn	np	nn	np	--	--	--	np	nn	np	np	nn	nn	nn	--	nn	nn	np	np	nn	nn	nn	nn	nn	np	--	nn	np	nn	--	np	nn	nn	np	--	nn	np	nn	np	--	nn	nn	--	nn	np	--	np
Marker203	<nnxnp>	np	nn	np	nn	np	--	--	--	nn	nn	np	np	nn	nn	nn	--	nn	nn	np	np	nn	nn	nn	nn	nn	np	--	nn	np	nn	--	np	nn	nn	np	--	nn	np	nn	np	--	nn	nn	--	nn	np	--	np
Marker8141	<lmxll>	ll	ll	lm	lm	lm	lm	ll	ll	ll	ll	ll	ll	ll	lm	ll	lm	ll	lm	ll	lm	lm	lm	lm	ll	ll	ll	ll	lm	ll	ll	ll	ll	lm	lm	ll	ll	lm	ll	ll	ll	ll	ll	ll	lm	ll	lm	ll	ll
Marker28020	<lmxll>	ll	ll	lm	ll	lm	lm	ll	ll	ll	ll	ll	ll	ll	lm	lm	lm	ll	lm	ll	lm	lm	lm	lm	ll	ll	ll	ll	lm	ll	ll	ll	ll	lm	lm	ll	ll	lm	ll	ll	lm	ll	ll	ll	lm	ll	lm	ll	ll
Marker42806	<lmxll>	lm	lm	ll	lm	ll	ll	lm	lm	lm	lm	lm	lm	lm	ll	ll	ll	lm	ll	lm	ll	ll	ll	ll	lm	lm	lm	lm	ll	lm	lm	lm	ll	ll	ll	lm	lm	ll	lm	lm	ll	ll	lm	lm	ll	lm	ll	lm	lm
Marker11970	<lmxll>	lm	lm	ll	lm	ll	ll	lm	lm	lm	lm	lm	lm	lm	ll	ll	ll	lm	ll	lm	ll	ll	ll	ll	lm	lm	lm	lm	ll	lm	lm	lm	ll	ll	lm	lm	ll	ll	ll	lm	ll	ll	lm	lm	ll	lm	ll	lm	lm
Marker25738	<lmxll>	lm	lm	ll	lm	ll	ll	lm	lm	lm	lm	lm	lm	lm	ll	ll	ll	lm	ll	lm	ll	ll	ll	ll	lm	lm	lm	lm	ll	lm	lm	lm	ll	ll	lm	lm	ll	ll	ll	lm	ll	ll	lm	lm	ll	lm	ll	lm	lm
Marker6211	<lmxll>	lm	lm	ll	lm	ll	ll	lm	lm	lm	lm	lm	lm	lm	ll	ll	ll	lm	ll	lm	ll	ll	ll	ll	lm	lm	lm	lm	ll	lm	lm	lm	ll	ll	lm	lm	ll	ll	ll	lm	ll	ll	lm	lm	ll	lm	ll	lm	lm
Marker433	<nnxnp>	np	nn	np	nn	np	nn	nn	np	np	nn	np	np	nn	np	nn	nn	nn	nn	np	np	nn	nn	np	nn	nn	nn	nn	np	np	nn	nn	np	np	nn	nn	np	nn	np	np	np	nn	nn	nn	np	nn	np	np	np
Marker4698	<lmxll>	ll	ll	lm	ll	lm	lm	ll	ll	ll	ll	ll	ll	ll	lm	lm	lm	ll	lm	ll	lm	lm	lm	lm	ll	ll	ll	ll	lm	ll	ll	ll	lm	lm	ll	ll	lm	lm	ll	ll	lm	lm	ll	ll	lm	ll	lm	ll	ll
Marker42802	<lmxll>	ll	ll	lm	ll	lm	lm	ll	ll	ll	ll	ll	ll	ll	lm	lm	lm	ll	lm	ll	lm	lm	lm	lm	ll	ll	ll	ll	lm	ll	ll	ll	lm	lm	ll	ll	ll	lm	ll	ll	lm	lm	ll	ll	lm	ll	lm	ll	ll
Marker23414	<lmxll>	ll	ll	lm	ll	lm	lm	ll	ll	lm	ll	ll	ll	ll	lm	lm	lm	ll	lm	ll	lm	lm	lm	lm	ll	ll	ll	ll	lm	ll	ll	ll	lm	lm	ll	ll	ll	lm	ll	ll	lm	lm	ll	ll	lm	ll	lm	ll	ll
Marker12665	<lmxll>	lm	lm	ll	lm	ll	ll	lm	lm	ll	lm	lm	lm	lm	ll	ll	ll	lm	ll	lm	ll	ll	ll	ll	lm	lm	lm	lm	ll	lm	lm	lm	ll	ll	lm	lm	lm	ll	lm	lm	ll	ll	lm	lm	ll	lm	ll	lm	lm
Marker25349	<lmxll>	lm	ll	lm	ll	lm	lm	ll	ll	lm	ll	ll	ll	ll	lm	lm	lm	ll	lm	ll	lm	lm	lm	lm	ll	ll	ll	ll	lm	ll	ll	ll	lm	lm	ll	ll	ll	lm	ll	ll	lm	lm	ll	ll	lm	ll	lm	ll	ll
Marker4845	<lmxll>	ll	ll	lm	ll	lm	lm	ll	ll	ll	ll	ll	ll	ll	lm	lm	lm	ll	lm	ll	lm	lm	lm	lm	ll	ll	ll	ll	lm	ll	ll	ll	lm	lm	ll	ll	ll	lm	ll	ll	lm	lm	ll	ll	lm	ll	lm	ll	ll
Marker130	<efxeg>	ee	eg	ee	eg	--	--	eg	--	eg	--	ee	ee	eg	--	--	--	--	--	eg	--	--	ee	--	eg	--	eg	eg	--	ee	eg	--	--	--	ee	eg	ee	--	--	--	--	--	eg	--	--	--	--	ee	--
Marker59792	<nnxnp>	np	nn	np	nn	np	nn	nn	np	np	nn	np	np	nn	np	nn	nn	nn	nn	np	np	nn	nn	nn	nn	nn	nn	nn	np	np	nn	nn	nn	np	nn	nn	np	nn	np	np	np	nn	nn	nn	np	nn	np	np	np
Marker33744	<abxcd>	ad	bc	ad	--	ad	ac	bc	--	ac	bc	bd	bd	--	ac	ac	--	bc	ac	bd	ad	ac	ac	ac	--	bc	bc	bc	ad	bd	bc	--	ad	--	--	--	--	--	--	--	--	--	--	--	--	--	ad	--	--
Marker30427	<nnxnp>	np	nn	np	nn	np	nn	nn	np	np	nn	np	np	nn	nn	nn	nn	nn	nn	np	np	nn	nn	nn	nn	nn	nn	nn	np	np	nn	nn	nn	np	nn	nn	np	nn	np	np	np	nn	nn	nn	np	nn	np	np	np
Marker35558	<lmxll>	ll	ll	lm	ll	lm	lm	ll	ll	ll	ll	ll	ll	ll	ll	lm	lm	ll	lm	ll	lm	lm	lm	lm	ll	ll	ll	ll	lm	ll	ll	ll	lm	lm	ll	ll	ll	lm	ll	ll	lm	lm	ll	ll	lm	ll	lm	ll	ll
Marker33492	<nnxnp>	np	nn	np	nn	np	nn	nn	np	np	nn	np	np	nn	nn	nn	nn	nn	nn	np	np	nn	nn	nn	nn	nn	nn	nn	np	np	nn	nn	nn	np	nn	nn	np	nn	np	np	np	nn	nn	nn	np	nn	np	np	np
Marker7971	<lmxll>	ll	ll	lm	ll	lm	lm	ll	ll	lm	ll	ll	ll	ll	ll	lm	lm	ll	lm	ll	lm	lm	lm	lm	ll	ll	ll	ll	lm	ll	ll	ll	ll	lm	ll	ll	ll	lm	ll	ll	lm	ll	ll	ll	lm	ll	lm	ll	ll
Marker33490	<nnxnp>	nn	np	nn	np	nn	np	np	nn	np	np	nn	nn	np	np	np	np	np	np	nn	nn	np	np	np	np	np	np	np	nn	nn	np	np	np	nn	np	np	nn	np	nn	nn	nn	np	np	np	nn	np	nn	nn	nn
Marker14201	<lmxll>	ll	ll	lm	ll	lm	lm	ll	ll	lm	ll	ll	ll	ll	ll	lm	lm	ll	lm	ll	lm	lm	lm	lm	ll	lm	ll	ll	lm	ll	ll	ll	ll	lm	ll	ll	ll	lm	ll	ll	lm	ll	ll	ll	lm	ll	lm	ll	ll
Marker4709	<nnxnp>	nn	np	nn	np	nn	np	np	nn	np	np	nn	nn	np	np	np	np	np	np	np	nn	np	np	np	nn	np	np	np	nn	nn	np	np	nn	nn	np	np	nn	np	nn	nn	nn	np	np	np	nn	np	nn	nn	np
Marker32434	<lmxll>	ll	ll	lm	ll	lm	lm	ll	ll	lm	ll	ll	ll	ll	ll	lm	lm	ll	lm	ll	lm	lm	lm	lm	ll	lm	ll	ll	lm	ll	ll	ll	ll	lm	ll	ll	ll	lm	ll	ll	lm	lm	ll	ll	lm	ll	lm	lm	ll
Marker25875	<nnxnp>	nn	np	nn	np	nn	np	np	nn	np	np	nn	nn	np	np	np	np	np	np	np	nn	np	nn	np	nn	np	np	np	nn	nn	np	np	nn	nn	np	np	nn	np	nn	np	nn	np	np	np	nn	np	nn	nn	np
Marker2611	<abxcd>	ad	ac	bd	ac	--	bc	ac	ad	ac	ac	ad	--	ac	ac	bc	bd	ac	--	ac	bd	bc	bd	bc	ad	--	ac	ac	bd	ad	ac	ad	ac	bd	ac	--	--	bc	ad	ac	--	bc	ad	ac	bd	--	bd	bd	--
Marker32424	<lmxll>	lm	lm	ll	lm	ll	ll	lm	lm	lm	lm	lm	lm	lm	lm	ll	ll	lm	ll	lm	ll	ll	ll	ll	lm	ll	lm	lm	ll	lm	lm	lm	lm	ll	lm	lm	lm	ll	lm	lm	ll	ll	lm	lm	ll	ll	ll	ll	lm
Marker31030	<abxcd>	ac	ad	bc	ad	bc	bd	ad	ac	--	ad	ac	ac	ad	ad	bd	--	ad	bd	ad	bc	bd	bc	bd	ad	bd	ad	ad	bc	ac	ad	--	ad	bc	ad	ad	--	--	--	--	bc	--	--	ad	--	--	--	--	--
Marker32420	<lmxll>	lm	lm	ll	lm	ll	ll	lm	lm	lm	lm	lm	lm	lm	lm	ll	ll	lm	ll	lm	ll	ll	ll	ll	lm	ll	lm	lm	ll	lm	lm	lm	lm	ll	lm	lm	lm	ll	lm	ll	ll	ll	lm	lm	ll	ll	ll	ll	lm
Marker23418	<nnxnp>	np	nn	np	nn	np	nn	nn	np	nn	nn	np	np	nn	nn	nn	np	nn	nn	nn	np	nn	np	nn	nn	nn	nn	nn	np	np	nn	nn	nn	np	nn	nn	np	nn	np	nn	np	nn	nn	nn	np	nn	np	np	nn
Marker32425	<nnxnp>	nn	np	nn	np	nn	np	np	nn	np	np	nn	nn	np	np	np	nn	np	np	np	nn	np	nn	np	np	np	np	np	nn	nn	np	nn	np	nn	np	np	nn	np	nn	np	nn	np	np	np	nn	np	nn	nn	np
Marker32435	<lmxll>	ll	ll	lm	ll	lm	lm	ll	ll	ll	ll	ll	ll	ll	ll	lm	lm	ll	lm	ll	lm	lm	lm	lm	ll	lm	ll	ll	lm	ll	ll	ll	ll	lm	ll	ll	ll	lm	ll	lm	lm	lm	ll	ll	lm	lm	lm	lm	ll
Marker21042	<nnxnp>	nn	np	nn	np	nn	np	np	nn	np	np	nn	nn	np	np	np	nn	np	np	np	nn	np	nn	np	np	np	np	np	nn	nn	np	nn	np	nn	np	np	nn	np	nn	np	nn	np	nn	np	nn	np	nn	nn	np
Marker33932	<nnxnp>	np	nn	np	nn	np	nn	nn	np	nn	nn	np	np	nn	nn	nn	np	nn	nn	nn	np	nn	np	nn	nn	nn	nn	nn	np	np	nn	np	nn	np	nn	nn	np	nn	np	nn	np	nn	np	nn	np	nn	np	np	nn
Marker7765	<nnxnp>	np	nn	np	nn	np	nn	nn	np	nn	nn	np	np	nn	nn	nn	np	nn	nn	nn	np	nn	np	nn	nn	nn	nn	nn	np	np	nn	np	nn	np	nn	nn	np	nn	np	nn	np	nn	np	nn	np	nn	np	np	np
Marker6722	<nnxnp>	nn	np	nn	np	nn	np	np	nn	np	np	nn	nn	np	np	np	nn	np	np	np	nn	np	nn	np	np	np	np	np	nn	nn	np	nn	np	nn	np	np	nn	np	nn	np	nn	np	nn	np	nn	np	nn	nn	nn
Marker12435	<nnxnp>	nn	np	nn	np	nn	np	np	nn	np	np	nn	nn	np	np	np	nn	np	np	np	nn	np	nn	np	np	np	np	np	nn	nn	np	nn	np	nn	np	np	nn	np	nn	np	nn	np	nn	np	nn	np	nn	nn	nn
Marker3356	<nnxnp>	nn	np	nn	np	nn	np	np	nn	np	np	nn	nn	np	np	np	nn	np	np	np	nn	np	nn	np	np	np	np	np	nn	nn	np	nn	np	nn	np	np	nn	np	nn	np	nn	np	np	np	nn	np	nn	nn	nn
Marker7480	<nnxnp>	nn	np	nn	np	nn	np	np	nn	np	np	nn	nn	np	np	np	np	np	np	np	nn	np	nn	np	np	np	np	np	nn	nn	np	nn	np	nn	np	np	nn	np	nn	np	nn	np	np	np	nn	np	nn	nn	nn
Marker23421	<nnxnp>	nn	np	nn	np	nn	np	np	nn	np	np	nn	nn	np	np	np	np	np	np	np	nn	np	nn	np	np	np	np	np	nn	nn	np	nn	np	nn	np	np	nn	np	nn	np	nn	np	np	np	nn	np	nn	nn	nn
Marker31039	<lmxll>	lm	lm	ll	lm	ll	ll	lm	lm	lm	lm	lm	lm	lm	lm	ll	ll	lm	ll	lm	ll	ll	ll	lm	lm	ll	lm	lm	ll	lm	lm	lm	lm	ll	lm	lm	ll	ll	lm	ll	ll	ll	lm	lm	ll	ll	ll	ll	lm
Marker42813	<nnxnp>	nn	np	nn	np	nn	np	np	nn	np	np	nn	nn	np	np	np	np	np	np	np	nn	np	nn	np	np	np	np	np	nn	nn	np	np	np	nn	np	np	nn	np	nn	np	nn	nn	np	np	nn	np	nn	nn	nn
Marker11939	<nnxnp>	nn	np	nn	np	nn	np	np	nn	np	np	nn	nn	np	np	np	nn	np	np	np	nn	np	nn	np	np	np	np	np	nn	nn	np	np	np	nn	nn	np	nn	np	nn	np	nn	nn	np	np	nn	np	nn	nn	nn
Marker30977	<nnxnp>	nn	np	nn	np	nn	np	np	nn	np	np	nn	nn	np	np	np	nn	np	np	np	nn	np	nn	np	np	np	np	np	nn	nn	np	np	np	nn	nn	np	nn	np	nn	np	nn	nn	np	np	nn	np	nn	nn	nn
Marker32604	<lmxll>	lm	lm	lm	lm	ll	ll	lm	lm	lm	lm	lm	lm	lm	lm	ll	ll	lm	ll	lm	lm	ll	ll	lm	lm	ll	ll	lm	ll	lm	lm	lm	lm	lm	lm	lm	ll	ll	lm	lm	ll	ll	lm	lm	ll	ll	ll	ll	lm
Marker43264	<efxeg>	eg	--	--	--	eg	--	--	eg	--	ee	eg	eg	--	ee	ee	--	ee	ee	--	eg	ee	eg	ee	ee	ee	ee	--	--	eg	--	--	--	eg	--	--	--	--	--	ee	eg	--	--	ee	--	ee	--	--	--
Marker32537	<nnxnp>	np	nn	np	nn	np	nn	nn	np	np	nn	np	np	nn	nn	nn	np	nn	nn	nn	np	nn	np	nn	nn	nn	nn	nn	np	np	nn	nn	nn	np	nn	nn	np	nn	np	nn	np	np	nn	nn	np	nn	np	np	np
Marker10311	<lmxll>	ll	ll	ll	ll	lm	lm	ll	ll	ll	ll	ll	ll	ll	ll	lm	lm	ll	lm	ll	ll	lm	lm	ll	ll	lm	lm	ll	lm	ll	ll	ll	ll	ll	ll	ll	ll	lm	ll	ll	lm	lm	ll	ll	lm	lm	lm	lm	ll
Marker43078	<efxeg>	eg	ee	eg	ee	--	ee	--	--	--	ee	eg	eg	--	ee	ee	--	--	--	--	eg	--	--	ee	--	ee	--	--	--	eg	ee	--	ee	eg	--	--	--	--	eg	ee	eg	--	--	--	--	ee	--	--	--
Marker34592	<nnxnp>	np	nn	np	nn	np	nn	nn	np	np	nn	np	np	nn	nn	nn	np	nn	nn	nn	np	nn	np	nn	nn	nn	nn	nn	np	np	nn	nn	nn	np	nn	nn	np	nn	np	nn	np	np	nn	nn	np	nn	np	np	np
Marker16129	<nnxnp>	np	nn	np	nn	np	nn	nn	np	np	nn	np	np	nn	nn	nn	np	nn	nn	nn	np	nn	np	nn	nn	nn	nn	nn	np	np	nn	nn	nn	np	nn	nn	np	np	np	nn	np	np	nn	nn	np	nn	np	np	np
Marker40470	<nnxnp>	np	nn	np	nn	np	nn	nn	np	np	nn	np	np	nn	nn	nn	np	nn	nn	nn	np	nn	np	nn	nn	nn	nn	nn	np	np	nn	nn	nn	np	nn	nn	np	np	np	nn	np	np	nn	nn	np	nn	np	np	np
Marker43267	<nnxnp>	np	nn	np	nn	np	nn	nn	np	np	nn	np	np	nn	nn	nn	np	nn	nn	nn	np	nn	np	nn	nn	nn	nn	nn	np	np	nn	nn	nn	np	nn	nn	np	np	np	nn	np	np	nn	nn	np	nn	np	np	np
Marker30982	<lmxll>	lm	lm	lm	lm	ll	ll	lm	lm	lm	lm	lm	lm	lm	lm	ll	ll	lm	ll	lm	lm	ll	ll	lm	lm	ll	ll	lm	ll	lm	lm	lm	lm	lm	lm	ll	lm	lm	lm	lm	ll	ll	lm	lm	ll	ll	lm	ll	lm
Marker32436	<nnxnp>	np	nn	np	nn	np	nn	nn	np	np	nn	np	np	nn	nn	np	np	nn	nn	nn	np	nn	np	nn	nn	nn	nn	nn	np	np	nn	nn	nn	np	nn	nn	np	nn	np	nn	np	np	nn	nn	np	nn	np	nn	np
Marker22541	<efxeg>	ef	ef	ef	ef	--	ee	ee	--	ef	ef	ef	ef	--	ef	ef	--	--	--	--	ef	ee	ee	ef	ee	ee	ee	--	ee	ef	ee	ee	ee	ef	--	--	ef	ef	ef	ef	eg	--	ee	ef	ee	--	ef	ef	ef
Marker31041	<nnxnp>	np	nn	np	nn	np	nn	nn	np	np	nn	np	np	nn	nn	np	np	nn	nn	nn	np	nn	np	nn	nn	nn	nn	nn	np	np	nn	nn	np	nn	nn	nn	np	nn	np	nn	np	np	nn	nn	np	nn	np	nn	np
Marker302	<nnxnp>	np	nn	np	nn	np	nn	nn	np	np	nn	np	np	nn	nn	np	np	nn	np	np	nn	nn	nn	nn	nn	np	nn	nn	np	np	nn	nn	np	nn	nn	nn	np	nn	np	nn	np	np	nn	nn	np	nn	np	nn	np
Marker535	<nnxnp>	np	nn	np	nn	np	nn	nn	np	np	nn	np	np	nn	nn	np	np	nn	np	np	nn	nn	nn	nn	nn	np	nn	nn	np	np	nn	nn	np	nn	nn	nn	np	nn	np	nn	np	np	nn	nn	np	nn	np	nn	np
Marker22609	<lmxll>	ll	ll	ll	ll	lm	ll	ll	ll	ll	ll	ll	ll	lm	ll	lm	ll	lm	lm	ll	ll	lm	lm	ll	ll	lm	lm	ll	lm	ll	ll	ll	ll	ll	ll	lm	ll	ll	ll	lm	lm	lm	ll	ll	lm	lm	ll	lm	ll
Marker26062	<lmxll>	ll	ll	ll	ll	lm	ll	ll	ll	ll	ll	ll	ll	lm	ll	lm	ll	lm	lm	ll	ll	lm	lm	ll	ll	lm	lm	ll	lm	ll	ll	ll	ll	ll	ll	lm	ll	ll	ll	lm	lm	lm	ll	ll	lm	lm	ll	lm	ll
Marker34542	<lmxll>	ll	ll	ll	ll	lm	ll	ll	ll	ll	ll	ll	ll	lm	ll	lm	ll	lm	lm	ll	ll	lm	lm	ll	ll	lm	lm	ll	lm	ll	ll	ll	ll	ll	ll	lm	ll	ll	ll	lm	lm	lm	ll	ll	lm	lm	ll	lm	ll
Marker23314	<lmxll>	ll	ll	ll	ll	lm	ll	ll	ll	ll	ll	ll	ll	lm	ll	lm	ll	lm	lm	ll	ll	lm	lm	ll	ll	lm	lm	ll	lm	ll	ll	ll	ll	ll	ll	lm	ll	ll	ll	lm	lm	lm	ll	ll	lm	lm	ll	lm	ll
Marker41661	<lmxll>	ll	ll	ll	ll	lm	ll	ll	ll	ll	ll	ll	ll	lm	ll	lm	ll	lm	lm	ll	ll	lm	lm	ll	ll	lm	lm	ll	lm	ll	ll	ll	ll	ll	ll	lm	ll	ll	ll	lm	lm	lm	ll	ll	lm	lm	ll	lm	ll
Marker31512	<lmxll>	ll	ll	ll	ll	lm	ll	ll	ll	ll	ll	ll	ll	lm	ll	lm	ll	lm	lm	ll	ll	lm	lm	ll	ll	lm	lm	ll	lm	ll	ll	ll	ll	ll	ll	lm	ll	ll	ll	lm	lm	lm	ll	ll	lm	lm	ll	lm	ll
Marker14828	<lmxll>	ll	ll	ll	ll	lm	ll	ll	ll	ll	ll	ll	ll	lm	ll	lm	ll	lm	lm	ll	ll	lm	lm	ll	ll	lm	lm	ll	lm	ll	ll	ll	ll	ll	ll	lm	ll	ll	ll	lm	lm	lm	ll	ll	lm	lm	ll	lm	ll
Marker10724	<lmxll>	ll	ll	ll	ll	lm	ll	ll	ll	ll	ll	ll	ll	lm	ll	lm	ll	lm	lm	ll	ll	lm	lm	ll	ll	lm	lm	ll	lm	ll	ll	ll	ll	ll	ll	lm	ll	ll	ll	lm	lm	lm	ll	ll	lm	lm	ll	lm	ll
Marker703	<nnxnp>	nn	nn	nn	nn	np	nn	nn	np	np	nn	np	nn	nn	nn	np	np	np	nn	nn	np	nn	np	nn	np	nn	nn	nn	np	np	nn	--	nn	np	np	nn	np	nn	np	nn	nn	nn	np	np	np	nn	nn	np	nn
Marker33539	<lmxll>	ll	ll	ll	ll	lm	ll	ll	ll	ll	ll	ll	ll	lm	ll	lm	ll	lm	lm	ll	ll	lm	lm	ll	ll	lm	lm	ll	lm	ll	ll	ll	ll	ll	lm	lm	ll	ll	ll	lm	lm	lm	ll	ll	lm	lm	ll	lm	ll
Marker12878	<lmxll>	ll	ll	ll	ll	lm	ll	ll	ll	ll	ll	ll	ll	lm	ll	lm	ll	lm	lm	ll	ll	lm	lm	ll	ll	lm	lm	ll	lm	ll	ll	ll	ll	ll	lm	lm	ll	ll	ll	ll	lm	lm	ll	ll	lm	lm	ll	lm	ll
Marker8139	<nnxnp>	nn	nn	nn	nn	np	nn	nn	np	np	nn	np	nn	nn	nn	np	np	np	nn	nn	np	nn	np	nn	np	nn	nn	nn	np	np	nn	--	nn	np	np	nn	np	nn	np	nn	nn	nn	np	np	np	nn	nn	np	nn
Marker28235	<lmxll>	lm	lm	lm	lm	ll	lm	lm	lm	lm	lm	lm	lm	ll	lm	ll	lm	ll	ll	lm	lm	ll	ll	lm	lm	ll	ll	lm	ll	lm	lm	lm	lm	lm	ll	ll	lm	lm	lm	lm	ll	ll	lm	lm	ll	ll	lm	ll	lm
Marker6920	<lmxll>	ll	ll	ll	ll	lm	ll	ll	ll	ll	ll	ll	ll	lm	ll	lm	ll	lm	lm	ll	ll	lm	lm	ll	ll	lm	lm	ll	lm	ll	ll	ll	ll	ll	lm	lm	ll	ll	ll	ll	lm	lm	ll	ll	lm	lm	ll	lm	ll
Marker15528	<lmxll>	ll	ll	ll	ll	lm	ll	ll	ll	ll	ll	ll	ll	lm	ll	lm	ll	lm	lm	ll	ll	lm	lm	ll	ll	lm	lm	ll	lm	ll	ll	ll	ll	ll	lm	lm	ll	ll	ll	ll	lm	lm	ll	ll	lm	lm	ll	lm	ll
Marker28234	<lmxll>	ll	ll	ll	ll	lm	ll	ll	ll	ll	ll	ll	ll	lm	ll	lm	ll	lm	lm	ll	ll	lm	lm	ll	ll	lm	lm	ll	lm	ll	ll	ll	ll	ll	lm	lm	ll	ll	ll	ll	lm	lm	ll	ll	lm	lm	ll	lm	ll
Marker4471	<nnxnp>	nn	nn	nn	nn	np	nn	nn	np	nn	np	np	nn	nn	nn	np	np	np	nn	nn	np	nn	np	nn	np	nn	nn	nn	np	np	nn	--	nn	np	np	nn	np	nn	np	nn	nn	nn	np	np	np	nn	nn	np	nn
Marker2868	<lmxll>	ll	ll	ll	ll	lm	ll	lm	ll	ll	ll	ll	ll	lm	ll	lm	ll	lm	lm	ll	ll	lm	lm	ll	lm	lm	lm	ll	lm	ll	ll	ll	ll	ll	lm	lm	ll	ll	ll	ll	lm	lm	ll	ll	lm	lm	ll	lm	ll
Marker10542	<nnxnp>	nn	nn	nn	nn	np	nn	nn	np	np	np	np	nn	nn	nn	np	np	np	nn	nn	np	nn	np	nn	np	nn	nn	nn	np	np	nn	--	nn	np	np	nn	np	nn	np	nn	nn	nn	np	np	np	nn	nn	np	nn
Marker35771	<lmxll>	ll	ll	ll	ll	lm	ll	lm	ll	ll	ll	ll	ll	lm	ll	lm	ll	lm	lm	lm	ll	lm	lm	ll	lm	lm	lm	ll	lm	ll	ll	ll	ll	ll	lm	lm	ll	ll	ll	ll	ll	lm	ll	ll	lm	lm	ll	lm	ll
Marker16915	<lmxll>	lm	lm	lm	lm	ll	lm	ll	lm	lm	lm	lm	lm	ll	lm	ll	lm	ll	ll	ll	lm	ll	ll	lm	ll	ll	ll	lm	ll	lm	lm	lm	lm	lm	ll	ll	lm	lm	lm	lm	lm	ll	lm	lm	ll	ll	lm	ll	lm
Marker38507	<lmxll>	ll	ll	ll	ll	lm	ll	lm	ll	ll	ll	ll	ll	lm	ll	lm	ll	lm	lm	lm	ll	lm	lm	ll	lm	lm	lm	ll	lm	ll	ll	ll	ll	ll	lm	lm	ll	ll	ll	ll	ll	lm	ll	ll	lm	lm	ll	lm	ll
Marker36678	<lmxll>	ll	ll	ll	ll	lm	ll	lm	lm	ll	ll	ll	ll	lm	ll	lm	ll	lm	lm	lm	ll	lm	lm	ll	lm	lm	lm	ll	lm	ll	ll	ll	ll	ll	lm	lm	ll	ll	ll	ll	ll	lm	ll	ll	lm	lm	ll	lm	ll
Marker6768	<lmxll>	ll	ll	ll	ll	lm	ll	lm	lm	ll	ll	ll	ll	lm	ll	lm	ll	lm	lm	lm	ll	lm	lm	ll	lm	lm	lm	ll	lm	ll	ll	ll	ll	ll	lm	lm	ll	ll	ll	ll	ll	lm	ll	ll	lm	lm	ll	lm	ll
Marker46532	<nnxnp>	np	np	np	np	nn	np	np	nn	np	nn	nn	np	np	np	nn	nn	nn	np	np	nn	np	nn	np	nn	np	np	np	nn	nn	np	--	np	nn	nn	np	nn	np	nn	np	np	np	nn	nn	nn	np	np	nn	np
Marker6824	<lmxll>	ll	ll	ll	ll	lm	ll	lm	lm	ll	ll	ll	ll	lm	ll	lm	ll	lm	lm	lm	ll	lm	lm	ll	lm	lm	lm	ll	lm	ll	ll	lm	ll	ll	lm	lm	ll	ll	ll	ll	ll	lm	ll	ll	lm	lm	ll	lm	ll
Marker44571	<nnxnp>	np	np	np	np	nn	np	np	nn	np	nn	nn	np	np	np	np	nn	nn	np	np	nn	np	nn	np	nn	np	np	np	nn	nn	np	--	np	nn	nn	np	nn	np	nn	np	np	np	nn	nn	nn	np	np	nn	np
Marker36919	<efxeg>	ee	ee	ee	ee	ef	ee	ef	--	ee	--	--	ee	ee	--	--	--	ef	ef	ef	ee	ef	ef	ee	--	ef	--	ef	ee	ee	--	--	eg	eg	--	--	eg	eg	--	--	eg	--	--	eg	--	--	eg	--	--
Marker27657	<nnxnp>	np	np	np	np	nn	nn	np	nn	np	nn	nn	np	np	np	np	nn	nn	np	np	nn	np	nn	np	nn	np	np	np	nn	nn	np	--	np	nn	nn	np	nn	np	nn	np	np	np	nn	nn	nn	np	np	nn	nn
Marker28960	<nnxnp>	np	np	np	np	nn	nn	np	nn	np	nn	nn	np	np	np	np	nn	nn	np	np	nn	np	nn	np	nn	np	np	np	nn	nn	np	--	np	nn	nn	np	nn	np	nn	nn	np	np	nn	nn	nn	np	np	nn	nn
Marker19772	<lmxll>	ll	ll	ll	ll	lm	ll	lm	ll	ll	ll	ll	ll	lm	ll	ll	ll	lm	lm	lm	ll	lm	lm	ll	lm	lm	lm	ll	lm	ll	ll	lm	ll	ll	lm	lm	lm	ll	ll	ll	lm	lm	lm	ll	lm	lm	ll	lm	ll
Marker36935	<lmxll>	lm	lm	lm	lm	ll	lm	ll	ll	lm	lm	lm	lm	ll	lm	lm	lm	ll	ll	ll	lm	ll	ll	lm	ll	ll	ll	ll	lm	lm	lm	ll	lm	lm	ll	ll	lm	lm	ll	ll	lm	ll	lm	lm	ll	ll	lm	ll	lm
Marker22796	<abxcd>	--	bd	bd	bd	ac	--	--	--	--	bc	bc	bd	--	bd	--	--	ac	ad	ad	bc	ad	ac	bd	--	ad	ad	ad	bc	bc	bd	--	--	bc	--	--	--	bd	--	--	--	ad	--	--	--	--	--	ac	--
Marker36917	<lmxll>	ll	ll	ll	ll	lm	ll	lm	lm	ll	ll	ll	ll	lm	ll	ll	ll	lm	lm	lm	ll	lm	lm	ll	lm	lm	lm	lm	ll	ll	ll	lm	ll	ll	lm	lm	ll	ll	lm	lm	ll	lm	ll	ll	lm	lm	ll	lm	ll
Marker15497	<lmxll>	lm	lm	lm	lm	ll	lm	ll	lm	lm	lm	lm	lm	ll	lm	lm	ll	ll	ll	ll	lm	ll	ll	lm	ll	ll	ll	ll	lm	lm	lm	ll	lm	lm	ll	ll	lm	lm	ll	ll	lm	ll	lm	lm	ll	ll	lm	ll	lm
Marker12660	<nnxnp>	np	np	np	np	nn	nn	np	nn	np	nn	nn	np	np	np	np	nn	nn	np	np	nn	np	nn	np	nn	np	np	np	np	nn	np	--	np	nn	nn	np	np	np	nn	np	np	np	np	nn	nn	np	np	nn	nn
Marker12644	<lmxll>	lm	lm	lm	lm	ll	lm	ll	ll	lm	lm	lm	lm	ll	lm	lm	lm	ll	ll	ll	lm	ll	ll	lm	ll	ll	ll	ll	lm	lm	lm	ll	lm	lm	ll	ll	lm	lm	ll	ll	ll	ll	lm	ll	ll	ll	lm	ll	lm
Marker12661	<lmxll>	ll	ll	ll	ll	lm	ll	lm	lm	ll	ll	ll	ll	lm	ll	ll	ll	lm	lm	lm	ll	lm	lm	ll	lm	lm	lm	lm	ll	ll	ll	lm	ll	ll	lm	lm	ll	ll	lm	lm	lm	lm	ll	lm	lm	lm	ll	lm	ll
Marker12655	<nnxnp>	nn	nn	nn	nn	np	np	nn	np	nn	np	np	nn	nn	nn	nn	np	np	nn	nn	np	nn	np	nn	np	np	nn	nn	nn	np	nn	--	nn	np	np	nn	nn	nn	np	nn	nn	nn	nn	np	np	nn	nn	np	np
Marker12662	<lmxll>	ll	ll	ll	ll	lm	ll	lm	lm	ll	ll	ll	ll	lm	ll	ll	lm	lm	lm	lm	ll	lm	lm	ll	lm	lm	lm	lm	ll	ll	ll	lm	ll	ll	lm	lm	ll	ll	lm	lm	lm	lm	ll	lm	lm	lm	ll	lm	ll
Marker5723	<lmxll>	ll	ll	ll	ll	lm	ll	lm	ll	ll	ll	ll	ll	lm	ll	ll	lm	lm	lm	lm	ll	lm	lm	ll	lm	lm	lm	lm	ll	ll	ll	lm	ll	ll	lm	lm	ll	ll	lm	lm	lm	lm	ll	lm	lm	lm	ll	lm	ll
Marker4496	<lmxll>	ll	ll	ll	ll	lm	ll	lm	ll	ll	ll	ll	ll	lm	ll	ll	lm	lm	lm	lm	ll	lm	lm	ll	lm	lm	lm	lm	ll	ll	ll	lm	ll	ll	lm	lm	ll	ll	lm	lm	lm	lm	ll	lm	lm	lm	ll	lm	ll
Marker22766	<efxeg>	fg	fg	ef	fg	ee	--	ee	--	fg	--	fg	--	--	fg	fg	--	eg	eg	ee	fg	ee	eg	--	--	ee	--	eg	--	--	--	--	fg	fg	--	--	--	fg	--	--	--	--	--	ee	--	--	--	--	--
Marker17442	<lmxll>	lm	lm	lm	lm	ll	lm	ll	lm	lm	lm	lm	lm	ll	lm	lm	lm	ll	ll	ll	lm	ll	ll	lm	ll	ll	ll	lm	lm	lm	lm	ll	lm	lm	ll	ll	ll	lm	ll	ll	ll	ll	ll	lm	ll	ll	lm	ll	lm
Marker31906	<lmxll>	ll	ll	ll	ll	lm	ll	lm	ll	ll	ll	ll	ll	lm	ll	ll	lm	lm	lm	lm	ll	lm	lm	ll	lm	lm	lm	lm	ll	ll	ll	lm	lm	ll	lm	lm	lm	ll	lm	lm	lm	lm	lm	lm	lm	lm	ll	lm	ll
Marker44366	<lmxll>	lm	lm	lm	lm	ll	lm	ll	lm	lm	lm	lm	lm	ll	lm	lm	ll	ll	ll	ll	lm	ll	ll	lm	ll	ll	ll	ll	lm	lm	lm	ll	ll	lm	ll	ll	ll	lm	ll	ll	ll	ll	ll	ll	ll	ll	lm	ll	lm
Marker16002	<lmxll>	lm	lm	lm	lm	ll	lm	ll	lm	lm	lm	lm	lm	ll	lm	lm	ll	ll	ll	ll	lm	ll	ll	lm	ll	ll	ll	ll	lm	lm	lm	ll	ll	lm	ll	ll	ll	lm	ll	ll	ll	ll	ll	ll	ll	ll	lm	ll	lm
Marker11719	<lmxll>	lm	lm	lm	lm	ll	lm	ll	lm	lm	lm	lm	lm	ll	lm	lm	lm	ll	ll	ll	lm	ll	ll	lm	ll	ll	ll	ll	lm	lm	lm	ll	ll	lm	ll	ll	ll	lm	ll	ll	ll	ll	ll	lm	ll	ll	lm	ll	lm
Marker43411	<lmxll>	lm	lm	lm	lm	ll	lm	ll	lm	lm	ll	lm	lm	ll	lm	lm	lm	ll	ll	ll	lm	ll	ll	lm	ll	ll	ll	ll	lm	lm	lm	ll	ll	lm	ll	ll	ll	lm	ll	ll	ll	ll	ll	lm	ll	ll	lm	ll	lm
Marker35090	<lmxll>	lm	lm	lm	lm	ll	lm	ll	lm	lm	ll	lm	lm	ll	lm	lm	ll	ll	ll	ll	lm	ll	ll	lm	ll	ll	ll	ll	lm	lm	lm	ll	ll	lm	ll	ll	ll	lm	ll	ll	ll	ll	ll	ll	ll	ll	lm	ll	lm
Marker13057	<lmxll>	lm	lm	lm	lm	ll	lm	ll	lm	lm	ll	lm	lm	ll	lm	lm	ll	ll	ll	ll	lm	ll	ll	lm	ll	ll	ll	ll	lm	lm	lm	ll	ll	lm	ll	ll	ll	lm	ll	ll	ll	ll	ll	ll	ll	ll	lm	ll	lm
Marker13392	<lmxll>	lm	lm	lm	lm	ll	lm	ll	lm	lm	ll	lm	lm	ll	lm	lm	ll	ll	ll	ll	lm	ll	ll	lm	ll	ll	ll	ll	lm	lm	lm	ll	ll	lm	ll	ll	ll	lm	ll	ll	ll	ll	ll	ll	ll	ll	lm	ll	lm
Marker21322	<lmxll>	lm	lm	lm	lm	ll	lm	ll	lm	lm	ll	lm	lm	ll	lm	lm	ll	ll	ll	ll	lm	ll	ll	lm	ll	ll	ll	ll	lm	lm	lm	ll	ll	lm	ll	ll	ll	lm	ll	ll	ll	ll	ll	ll	ll	ll	lm	ll	lm
Marker1986	<lmxll>	ll	ll	ll	ll	lm	ll	lm	ll	ll	ll	ll	ll	lm	ll	ll	lm	lm	lm	lm	ll	lm	lm	ll	lm	lm	lm	lm	ll	lm	ll	lm	ll	ll	lm	lm	ll	lm	lm	lm	lm	lm	ll	ll	lm	lm	ll	lm	ll
Marker26506	<lmxll>	lm	ll	lm	lm	ll	lm	ll	lm	lm	lm	lm	lm	ll	lm	lm	ll	ll	ll	ll	lm	ll	ll	lm	ll	ll	ll	ll	lm	ll	lm	ll	ll	lm	ll	ll	lm	ll	ll	ll	ll	ll	lm	lm	ll	ll	lm	ll	lm
Marker5262	<efxeg>	--	eg	eg	eg	eg	ee	--	--	eg	ee	ee	eg	ee	ee	ee	--	eg	eg	ee	eg	ee	ee	ee	--	ee	eg	ee	eg	ee	eg	--	ee	ee	--	--	--	eg	ee	ee	eg	--	--	eg	--	ee	--	ee	ee
Marker36158	<nnxnp>	np	np	np	np	np	nn	np	nn	np	nn	np	np	nn	nn	np	np	np	np	nn	np	nn	nn	nn	np	nn	nn	nn	np	nn	np	nn	nn	nn	np	nn	nn	np	nn	nn	np	np	nn	np	nn	nn	np	nn	nn
Marker37624	<efxeg>	fg	eg	fg	eg	fg	ef	fg	--	fg	ef	--	ef	ef	ee	fg	--	eg	fg	ee	fg	ee	ef	ef	fg	ef	fg	ef	fg	ee	fg	--	ee	ef	--	--	ee	--	ee	ee	fg	--	--	fg	--	--	fg	ee	ee
Marker38145	<lmxll>	lm	ll	lm	ll	lm	lm	lm	ll	lm	lm	lm	lm	lm	ll	lm	lm	ll	lm	ll	lm	ll	lm	ll	lm	lm	lm	lm	lm	ll	lm	lm	ll	lm	ll	lm	lm	lm	lm	ll	lm	lm	lm	lm	lm	ll	lm	lm	lm
Marker38224	<lmxll>	ll	lm	ll	ll	ll	ll	ll	lm	ll	ll	ll	ll	ll	ll	ll	ll	lm	ll	lm	ll	lm	ll	lm	ll	ll	ll	ll	ll	lm	ll	ll	lm	ll	lm	ll	ll	ll	ll	lm	ll	ll	ll	ll	ll	ll	ll	ll	ll
Marker33650	<abxcd>	--	--	bd	bd	bd	--	bd	--	bd	bc	bd	bd	bc	bc	bd	bd	ad	bd	ac	--	ac	bc	--	--	bc	bd	bc	--	ac	bd	--	--	--	--	--	--	bd	--	--	bd	--	--	--	--	--	--	--	--
Marker5503	<nnxnp>	nn	nn	nn	nn	nn	np	nn	np	nn	np	nn	nn	np	np	nn	nn	nn	nn	np	nn	np	np	np	nn	np	nn	np	nn	np	nn	nn	np	np	nn	np	np	nn	np	np	nn	nn	np	nn	np	np	nn	np	np
Marker7872	<lmxll>	ll	lm	ll	lm	ll	ll	ll	lm	ll	ll	ll	ll	ll	ll	ll	ll	lm	ll	lm	ll	lm	ll	lm	ll	ll	ll	ll	ll	lm	ll	ll	lm	ll	lm	ll	ll	ll	ll	lm	ll	ll	ll	ll	ll	ll	ll	ll	ll
Marker13295	<lmxll>	lm	ll	lm	ll	lm	lm	lm	lm	lm	lm	lm	lm	lm	ll	lm	lm	ll	lm	ll	lm	ll	lm	ll	lm	lm	lm	ll	lm	lm	lm	ll	ll	lm	ll	lm	lm	lm	lm	ll	lm	lm	ll	lm	lm	lm	lm	lm	ll
Marker38599	<lmxll>	ll	lm	ll	lm	ll	ll	ll	ll	ll	ll	ll	ll	ll	lm	ll	ll	lm	ll	lm	ll	lm	ll	ll	ll	ll	ll	lm	ll	ll	ll	ll	lm	ll	lm	ll	ll	ll	ll	lm	ll	ll	lm	ll	ll	ll	ll	ll	lm
Marker6507	<lmxll>	ll	lm	ll	lm	ll	ll	ll	ll	ll	ll	ll	ll	ll	lm	ll	ll	lm	ll	lm	ll	lm	ll	lm	ll	ll	ll	ll	ll	lm	ll	ll	lm	ll	lm	ll	ll	ll	ll	lm	ll	ll	lm	ll	ll	ll	ll	ll	lm
Marker5332	<efxeg>	ee	ef	ee	ef	ee	ee	ee	--	ee	eg	ee	ee	ee	fg	ee	ee	ef	ee	fg	ee	--	eg	fg	ee	eg	ee	eg	ee	fg	ee	--	fg	eg	--	eg	ee	ee	--	ee	ee	--	--	ee	ee	--	ee	--	--
Marker3068	<lmxll>	lm	ll	lm	ll	lm	lm	lm	lm	lm	lm	lm	lm	lm	ll	lm	lm	ll	lm	ll	lm	ll	lm	ll	lm	lm	lm	ll	lm	lm	lm	lm	ll	lm	ll	lm	lm	lm	lm	ll	lm	lm	ll	lm	lm	lm	lm	lm	ll
Marker31589	<lmxll>	ll	lm	ll	lm	ll	ll	ll	lm	ll	ll	ll	ll	ll	lm	ll	ll	lm	ll	lm	ll	lm	ll	lm	ll	ll	ll	ll	ll	lm	ll	ll	lm	ll	lm	ll	ll	ll	ll	lm	ll	ll	ll	ll	ll	ll	ll	ll	ll
Marker11165	<lmxll>	ll	lm	ll	lm	ll	ll	ll	lm	ll	ll	ll	ll	ll	lm	ll	ll	lm	ll	lm	ll	lm	ll	lm	ll	ll	ll	ll	ll	lm	ll	ll	lm	ll	lm	ll	ll	ll	ll	lm	ll	ll	ll	ll	ll	ll	ll	ll	ll
Marker41597	<lmxll>	ll	lm	ll	lm	ll	ll	ll	lm	ll	ll	ll	ll	ll	lm	ll	ll	lm	ll	lm	ll	lm	ll	lm	ll	ll	ll	ll	ll	lm	ll	ll	lm	ll	lm	ll	ll	ll	ll	lm	ll	ll	ll	ll	ll	ll	ll	ll	ll
Marker41598	<lmxll>	ll	lm	ll	lm	ll	ll	ll	lm	ll	ll	ll	ll	ll	lm	ll	ll	lm	ll	lm	ll	lm	ll	lm	ll	ll	ll	ll	ll	lm	ll	ll	lm	ll	lm	ll	ll	ll	ll	lm	ll	ll	ll	ll	ll	ll	ll	ll	ll
Marker5354	<lmxll>	ll	lm	ll	lm	ll	ll	ll	lm	ll	ll	ll	ll	ll	lm	ll	ll	lm	ll	lm	ll	lm	ll	lm	ll	ll	ll	ll	ll	lm	ll	ll	lm	ll	lm	ll	ll	ll	ll	lm	ll	ll	ll	ll	ll	ll	ll	ll	ll
Marker48114	<nnxnp>	nn	nn	nn	nn	nn	np	nn	np	nn	np	nn	nn	np	np	nn	nn	nn	nn	np	nn	np	np	np	nn	np	nn	np	nn	np	nn	nn	np	np	nn	np	np	nn	np	np	nn	nn	np	nn	nn	np	nn	np	np
Marker14500	<lmxll>	lm	ll	lm	ll	lm	lm	lm	ll	lm	lm	lm	lm	lm	ll	lm	lm	ll	lm	ll	lm	ll	lm	ll	lm	lm	lm	lm	lm	ll	lm	lm	ll	lm	ll	lm	lm	lm	lm	lm	lm	lm	lm	lm	lm	lm	lm	lm	lm
Marker36767	<abxcd>	--	--	--	--	ac	ad	ac	--	ac	ad	--	--	ad	--	ac	--	bc	ac	bd	ac	bd	ad	bd	--	ad	--	ad	ac	bd	--	--	bd	ad	bc	--	--	--	--	--	ac	--	--	--	--	--	ac	--	--
Marker5327	<lmxll>	lm	ll	lm	ll	lm	lm	lm	ll	lm	lm	lm	lm	lm	ll	lm	lm	ll	lm	ll	lm	ll	lm	ll	lm	lm	lm	lm	lm	ll	lm	lm	ll	lm	ll	lm	lm	lm	lm	lm	lm	lm	lm	lm	lm	lm	lm	lm	lm
Marker26521	<lmxll>	lm	ll	lm	ll	lm	lm	lm	ll	lm	lm	lm	lm	lm	ll	lm	lm	ll	lm	ll	lm	ll	lm	ll	lm	lm	lm	lm	lm	ll	lm	lm	ll	lm	ll	lm	lm	lm	lm	lm	lm	lm	lm	lm	lm	lm	lm	lm	lm
Marker37620	<lmxll>	lm	ll	lm	ll	lm	lm	lm	ll	lm	lm	lm	lm	lm	ll	lm	lm	ll	lm	ll	lm	ll	lm	ll	lm	lm	lm	lm	lm	ll	lm	lm	ll	lm	ll	lm	lm	lm	lm	lm	lm	lm	lm	lm	lm	lm	lm	lm	lm
Marker42038	<lmxll>	lm	ll	lm	ll	lm	lm	lm	ll	lm	lm	lm	lm	lm	ll	lm	lm	ll	lm	ll	lm	ll	lm	ll	lm	lm	lm	lm	lm	ll	lm	lm	ll	lm	ll	lm	lm	lm	lm	lm	lm	lm	lm	lm	lm	lm	lm	lm	lm
Marker7867	<lmxll>	lm	ll	lm	ll	lm	lm	lm	ll	lm	lm	lm	lm	lm	ll	lm	lm	ll	lm	ll	lm	ll	lm	ll	lm	lm	lm	lm	lm	ll	lm	lm	ll	lm	ll	lm	lm	lm	lm	lm	lm	lm	lm	lm	lm	lm	lm	lm	lm
Marker5299	<lmxll>	lm	ll	lm	ll	lm	lm	lm	ll	lm	lm	lm	lm	lm	ll	lm	lm	ll	lm	ll	lm	ll	lm	ll	lm	lm	lm	lm	lm	ll	lm	lm	ll	lm	ll	lm	lm	lm	lm	lm	lm	lm	lm	lm	lm	lm	lm	lm	lm
Marker5208	<abxcd>	bd	ad	--	--	bd	bc	bd	--	bd	bc	bc	bd	bc	ac	--	--	ad	--	--	bd	--	--	ac	--	--	--	--	--	--	--	--	--	bc	--	--	--	--	--	--	bd	--	--	--	--	--	--	bc	--
Marker5268	<lmxll>	lm	ll	lm	ll	lm	lm	lm	ll	lm	lm	lm	lm	lm	ll	lm	lm	ll	lm	ll	lm	ll	lm	ll	lm	lm	lm	lm	lm	ll	lm	lm	ll	lm	ll	lm	lm	lm	lm	lm	lm	lm	lm	ll	lm	lm	lm	lm	lm
Marker59547	<nnxnp>	np	np	np	np	np	nn	np	nn	np	nn	nn	np	nn	nn	np	np	np	np	nn	np	nn	nn	nn	np	nn	np	nn	np	nn	np	np	nn	nn	np	nn	nn	np	nn	np	np	np	np	np	np	np	np	nn	nn
Marker7868	<lmxll>	lm	ll	lm	ll	lm	lm	lm	ll	lm	lm	lm	lm	lm	ll	lm	ll	ll	lm	ll	lm	ll	lm	ll	lm	lm	lm	lm	lm	ll	lm	lm	ll	lm	ll	lm	lm	lm	lm	ll	lm	lm	lm	ll	lm	lm	lm	lm	lm
Marker29142	<lmxll>	lm	ll	lm	ll	lm	lm	lm	ll	lm	lm	lm	lm	lm	ll	lm	ll	ll	lm	ll	lm	ll	lm	ll	lm	lm	lm	lm	lm	ll	lm	lm	ll	lm	ll	ll	lm	lm	lm	ll	lm	lm	lm	lm	lm	lm	lm	lm	lm
Marker31583	<lmxll>	ll	lm	ll	lm	ll	ll	ll	lm	ll	ll	ll	ll	ll	lm	ll	lm	lm	ll	lm	ll	lm	ll	lm	ll	ll	ll	ll	ll	lm	ll	ll	lm	ll	lm	lm	ll	ll	ll	lm	ll	ll	ll	ll	ll	ll	ll	ll	ll
Marker32880	<lmxll>	lm	ll	lm	ll	lm	lm	lm	ll	lm	lm	lm	lm	lm	ll	lm	ll	ll	lm	ll	lm	ll	lm	ll	lm	lm	lm	lm	lm	ll	lm	lm	ll	lm	ll	ll	lm	lm	lm	ll	lm	lm	lm	lm	lm	lm	lm	lm	lm
Marker38242	<efxeg>	ef	ee	ef	ee	ef	ef	ef	eg	ef	fg	--	ef	--	eg	ef	--	ee	ef	eg	ef	ee	fg	eg	--	fg	ee	fg	ee	eg	ef	ee	eg	fg	ee	--	fg	ef	--	ee	ef	ef	ef	--	--	--	ef	--	fg
Marker38149	<nnxnp>	np	np	np	np	np	np	np	nn	np	nn	nn	np	nn	nn	np	np	np	np	nn	np	np	nn	nn	np	nn	np	nn	np	nn	np	np	nn	nn	np	nn	nn	np	nn	np	np	np	np	np	np	np	np	nn	nn
Marker38144	<nnxnp>	np	np	np	np	np	nn	np	nn	np	nn	nn	np	nn	nn	np	nn	np	np	nn	np	np	nn	nn	np	nn	np	nn	np	nn	np	np	nn	nn	np	nn	nn	np	nn	np	np	np	np	np	np	np	np	nn	nn
Marker6500	<nnxnp>	np	np	np	np	np	nn	np	nn	np	nn	nn	np	nn	nn	np	nn	np	np	nn	np	np	nn	nn	np	nn	np	nn	np	nn	np	np	nn	nn	np	nn	nn	np	nn	np	np	np	np	np	np	np	np	nn	nn
Marker31636	<lmxll>	ll	lm	ll	lm	ll	ll	ll	ll	ll	ll	ll	ll	ll	lm	ll	ll	lm	ll	lm	ll	lm	ll	lm	ll	lm	ll	lm	ll	ll	ll	lm	lm	ll	lm	ll	ll	ll	ll	lm	ll	lm	lm	ll	ll	lm	ll	ll	lm
Marker3893	<nnxnp>	nn	nn	nn	nn	nn	np	nn	np	nn	np	np	nn	np	np	nn	np	nn	nn	np	nn	nn	np	np	nn	np	nn	np	nn	np	nn	nn	np	np	nn	np	np	nn	np	nn	nn	nn	nn	nn	np	nn	nn	nn	np
Marker17120	<nnxnp>	nn	nn	nn	nn	nn	np	nn	np	nn	np	np	nn	np	np	nn	np	nn	nn	np	nn	nn	np	np	nn	np	nn	np	nn	np	nn	nn	np	np	nn	np	np	nn	np	nn	nn	nn	nn	nn	np	nn	nn	nn	np
Marker16014	<lmxll>	ll	ll	lm	ll	lm	lm	lm	ll	lm	lm	lm	lm	lm	ll	lm	lm	ll	lm	ll	lm	ll	ll	ll	ll	ll	ll	ll	lm	ll	lm	lm	ll	lm	ll	lm	lm	lm	lm	ll	lm	ll	ll	lm	lm	ll	lm	lm	ll
Marker42039	<nnxnp>	nn	nn	nn	nn	nn	np	np	np	nn	np	np	nn	np	np	np	np	nn	nn	np	nn	nn	np	np	nn	np	nn	nn	np	np	nn	nn	np	np	nn	np	np	nn	np	nn	nn	nn	nn	nn	np	nn	nn	nn	np
Marker36609	<lmxll>	lm	lm	ll	lm	ll	ll	ll	ll	ll	ll	ll	ll	ll	lm	ll	ll	lm	ll	lm	ll	lm	lm	lm	ll	lm	lm	lm	ll	ll	ll	lm	lm	lm	lm	ll	ll	ll	ll	lm	ll	lm	lm	ll	ll	lm	ll	ll	lm
Marker11749	<lmxll>	ll	ll	lm	ll	lm	lm	lm	lm	lm	lm	lm	lm	lm	ll	lm	lm	ll	lm	ll	lm	ll	ll	ll	ll	ll	ll	ll	lm	lm	lm	lm	ll	lm	ll	lm	lm	lm	ll	ll	lm	ll	ll	ll	lm	ll	lm	ll	ll
Marker28910	<lmxll>	lm	lm	ll	lm	ll	ll	ll	ll	ll	ll	ll	ll	ll	lm	ll	ll	lm	ll	lm	ll	lm	lm	lm	lm	lm	lm	lm	ll	ll	ll	ll	lm	ll	lm	ll	ll	ll	lm	lm	ll	lm	lm	lm	ll	lm	ll	lm	lm
Marker7745	<nnxnp>	np	np	np	np	nn	nn	nn	nn	np	nn	nn	np	nn	nn	nn	nn	np	np	nn	np	np	nn	nn	np	nn	np	np	nn	nn	np	np	nn	nn	np	nn	nn	np	nn	np	np	np	np	np	nn	np	np	np	nn
Marker19377	<efxeg>	ef	ee	ee	ef	ee	ee	ee	ee	ee	ee	ef	ee	ee	ef	ee	--	ef	ee	ef	ee	--	ef	--	--	ee	ef	--	ee	ee	ee	ee	ef	ef	ee	ee	ee	ef	--	--	ee	--	--	ee	--	--	--	--	--
Marker5811	<nnxnp>	np	np	np	np	nn	nn	nn	nn	np	np	nn	np	nn	nn	nn	nn	np	np	nn	np	np	nn	nn	nn	nn	np	np	nn	nn	np	np	nn	nn	np	nn	nn	np	nn	np	np	np	np	np	nn	np	np	np	nn
Marker36613	<lmxll>	ll	ll	lm	ll	lm	lm	lm	lm	lm	lm	lm	lm	lm	ll	lm	lm	ll	lm	ll	lm	ll	ll	ll	lm	ll	ll	ll	lm	lm	lm	ll	ll	ll	ll	lm	lm	ll	ll	ll	lm	ll	ll	lm	lm	ll	lm	lm	ll
Marker29859	<nnxnp>	nn	nn	nn	nn	np	np	np	np	nn	nn	np	nn	np	np	np	np	nn	nn	np	nn	nn	np	np	np	np	nn	nn	np	np	nn	nn	np	np	nn	np	np	nn	np	nn	nn	nn	nn	nn	np	nn	nn	nn	np
Marker33710	<nnxnp>	nn	nn	nn	nn	np	np	np	np	nn	nn	np	nn	np	np	np	np	nn	nn	np	nn	nn	np	np	np	np	nn	nn	np	np	nn	nn	np	np	nn	np	np	nn	np	nn	nn	nn	nn	nn	np	nn	nn	nn	np
Marker16569	<lmxll>	ll	lm	lm	ll	lm	lm	lm	lm	lm	lm	ll	lm	lm	ll	lm	lm	ll	lm	ll	lm	ll	ll	ll	ll	ll	ll	ll	lm	lm	lm	lm	ll	ll	ll	lm	lm	ll	ll	ll	lm	ll	ll	lm	lm	ll	lm	lm	ll
Marker7799	<lmxll>	ll	lm	lm	ll	lm	lm	lm	lm	lm	lm	ll	lm	lm	ll	lm	lm	ll	lm	ll	lm	ll	ll	ll	ll	ll	ll	ll	lm	lm	lm	lm	ll	ll	ll	lm	lm	ll	ll	ll	lm	ll	ll	lm	lm	ll	lm	lm	ll
Marker37230	<lmxll>	ll	lm	lm	ll	lm	lm	lm	lm	lm	lm	ll	lm	lm	ll	lm	lm	ll	lm	ll	lm	ll	ll	ll	ll	ll	ll	ll	lm	lm	lm	lm	ll	ll	ll	lm	lm	ll	ll	ll	lm	ll	ll	lm	lm	ll	lm	lm	ll
Marker16573	<nnxnp>	np	np	np	np	nn	nn	nn	nn	np	np	nn	np	nn	nn	nn	nn	np	np	nn	np	np	nn	nn	nn	nn	np	np	nn	np	np	np	nn	nn	np	nn	nn	np	nn	np	np	np	np	np	nn	np	np	np	nn
Marker27912	<lmxll>	ll	lm	lm	ll	lm	lm	lm	lm	lm	lm	ll	lm	lm	ll	lm	lm	ll	lm	ll	lm	ll	ll	ll	ll	ll	ll	ll	lm	lm	lm	lm	ll	ll	ll	lm	lm	ll	ll	ll	lm	ll	ll	lm	lm	ll	lm	lm	ll
Marker40306	<lmxll>	ll	lm	lm	ll	lm	lm	lm	lm	lm	lm	ll	lm	lm	ll	lm	lm	ll	lm	ll	lm	ll	ll	ll	ll	ll	ll	ll	lm	lm	lm	lm	ll	ll	ll	ll	lm	ll	ll	ll	lm	ll	ll	lm	lm	ll	lm	lm	ll
Marker36858	<efxeg>	ef	ee	ee	ef	eg	eg	eg	eg	eg	ee	fg	ee	eg	fg	eg	--	ef	ee	fg	ee	--	fg	fg	--	fg	ef	ef	ee	ee	ee	--	--	fg	ee	ee	ee	ef	--	--	ee	--	--	ee	ee	--	ee	ee	--
Marker7837	<lmxll>	lm	ll	ll	ll	ll	ll	ll	ll	ll	ll	lm	ll	ll	lm	ll	ll	lm	ll	lm	ll	lm	lm	lm	lm	lm	lm	lm	ll	ll	ll	ll	lm	lm	lm	ll	ll	lm	lm	lm	ll	lm	lm	ll	ll	lm	ll	ll	lm
Marker30164	<lmxll>	ll	lm	lm	lm	lm	lm	lm	lm	lm	lm	ll	lm	lm	ll	lm	lm	ll	lm	ll	lm	ll	ll	ll	ll	ll	ll	ll	lm	lm	lm	lm	ll	ll	ll	lm	lm	ll	ll	ll	lm	ll	ll	lm	lm	ll	lm	lm	ll
Marker1952	<nnxnp>	nn	nn	nn	nn	np	np	np	np	nn	nn	np	nn	np	np	np	np	nn	np	np	nn	nn	np	np	np	np	nn	nn	np	nn	nn	np	np	np	nn	np	np	nn	np	np	nn	nn	nn	nn	nn	nn	nn	nn	np
Marker12108	<lmxll>	lm	ll	ll	ll	ll	ll	ll	ll	ll	ll	lm	ll	ll	lm	ll	ll	lm	ll	lm	ll	lm	lm	lm	lm	lm	lm	lm	ll	ll	ll	ll	lm	lm	lm	ll	ll	lm	lm	lm	ll	lm	lm	ll	ll	lm	ll	ll	lm
Marker64836	<nnxnp>	nn	nn	nn	nn	np	np	np	np	nn	nn	np	nn	np	np	np	np	nn	np	np	nn	nn	np	np	np	np	nn	nn	np	nn	nn	np	np	np	nn	np	np	nn	np	np	nn	nn	nn	nn	np	nn	nn	nn	np
Marker17028	<lmxll>	lm	ll	ll	lm	ll	ll	ll	ll	ll	ll	lm	ll	ll	lm	ll	ll	lm	ll	lm	ll	lm	lm	lm	lm	lm	lm	lm	ll	ll	ll	ll	lm	lm	lm	ll	ll	lm	lm	lm	ll	lm	lm	ll	ll	lm	ll	ll	lm
Marker39805	<lmxll>	lm	ll	ll	lm	ll	ll	ll	ll	ll	ll	lm	ll	ll	lm	ll	ll	lm	ll	lm	ll	lm	lm	lm	lm	lm	lm	lm	ll	ll	ll	ll	lm	lm	lm	ll	ll	lm	lm	lm	ll	lm	lm	ll	ll	lm	ll	ll	lm
Marker14253	<nnxnp>	np	np	np	np	nn	nn	nn	nn	np	np	nn	np	nn	nn	nn	nn	np	np	nn	np	np	nn	nn	nn	nn	np	np	nn	np	np	nn	nn	nn	np	nn	nn	np	nn	np	np	np	np	np	np	np	np	np	nn
Marker17394	<lmxll>	ll	lm	lm	ll	lm	lm	lm	lm	lm	lm	ll	lm	lm	ll	lm	lm	ll	lm	ll	lm	ll	ll	ll	ll	ll	ll	ll	lm	lm	lm	lm	ll	ll	ll	lm	lm	ll	ll	ll	lm	ll	ll	lm	lm	ll	lm	lm	ll
Marker54360	<nnxnp>	nn	nn	nn	nn	np	np	np	np	nn	nn	np	nn	np	np	np	np	nn	nn	np	nn	nn	np	np	np	np	nn	nn	np	nn	nn	np	np	np	nn	np	np	nn	np	nn	nn	nn	nn	nn	nn	np	nn	nn	np
Marker3036	<lmxll>	lm	ll	ll	lm	ll	ll	ll	ll	ll	ll	lm	ll	ll	lm	ll	ll	lm	ll	lm	ll	lm	lm	lm	lm	lm	lm	lm	ll	ll	ll	ll	lm	lm	lm	ll	ll	lm	lm	lm	ll	lm	lm	ll	ll	lm	ll	ll	lm
Marker3125	<abxcd>	bc	ac	--	bc	ad	ad	ad	--	ac	ac	bd	--	ad	bd	--	--	bc	ac	bd	ac	--	bd	bd	--	bd	bc	bc	ad	ac	--	--	--	bd	--	ad	--	bc	bd	--	--	--	--	ac	--	--	--	ac	bd
Marker20439	<lmxll>	ll	lm	lm	ll	lm	lm	lm	lm	lm	lm	ll	lm	lm	ll	lm	lm	ll	lm	ll	lm	ll	ll	ll	ll	ll	ll	ll	lm	lm	lm	lm	ll	ll	ll	lm	lm	ll	ll	ll	lm	ll	ll	lm	lm	lm	lm	lm	ll
Marker37228	<efxeg>	ef	ee	ee	ef	eg	eg	eg	eg	--	ee	fg	ee	eg	fg	eg	--	ef	ee	fg	ee	ef	fg	fg	fg	fg	ef	ef	eg	ee	ee	--	fg	--	ef	eg	--	ef	fg	--	ee	ee	ee	ee	--	--	ee	ee	--
Marker30163	<nnxnp>	nn	nn	nn	nn	np	np	np	np	nn	nn	np	nn	np	np	np	np	nn	nn	np	nn	nn	np	np	np	np	nn	nn	np	nn	nn	nn	np	np	nn	np	np	nn	np	nn	nn	nn	nn	nn	np	nn	nn	nn	np
Marker8171	<lmxll>	ll	lm	lm	ll	lm	lm	lm	lm	lm	lm	ll	lm	lm	ll	lm	lm	ll	lm	ll	lm	ll	ll	ll	ll	ll	ll	ll	lm	lm	lm	lm	ll	ll	ll	ll	lm	ll	ll	ll	lm	ll	ll	lm	lm	ll	lm	lm	ll
Marker24794	<lmxll>	ll	lm	lm	ll	lm	lm	lm	lm	lm	lm	ll	lm	lm	ll	lm	lm	ll	lm	ll	lm	ll	ll	ll	ll	ll	ll	ll	lm	lm	lm	lm	ll	ll	ll	ll	lm	ll	ll	ll	lm	ll	ll	lm	lm	ll	lm	lm	ll
Marker19321	<nnxnp>	np	np	np	np	nn	nn	nn	nn	np	np	nn	np	nn	nn	nn	nn	np	np	nn	np	np	nn	nn	nn	nn	np	np	nn	np	np	nn	nn	nn	nn	nn	nn	np	nn	nn	np	nn	np	np	nn	np	nn	np	nn
Marker1809	<nnxnp>	np	np	np	np	nn	nn	nn	nn	np	np	nn	np	nn	nn	nn	nn	np	np	nn	np	np	nn	nn	nn	nn	np	np	nn	np	np	nn	nn	nn	np	nn	nn	np	nn	np	np	np	np	np	nn	nn	np	np	nn
Marker6616	<nnxnp>	np	np	np	np	nn	nn	nn	nn	np	np	nn	np	nn	nn	nn	nn	np	np	nn	np	np	nn	nn	nn	nn	np	np	nn	np	np	nn	nn	nn	np	nn	nn	np	nn	np	np	np	np	np	nn	nn	np	np	nn
Marker36866	<efxeg>	eg	--	--	eg	ef	ef	ef	ef	--	fg	ee	--	ef	ee	ef	ee	eg	--	ee	fg	eg	--	ee	ee	ee	eg	eg	ef	fg	fg	--	ee	ee	--	eg	ef	eg	ee	ee	--	ee	ee	fg	ef	ee	ef	--	ee
Marker1847	<nnxnp>	nn	nn	nn	nn	np	np	np	np	np	nn	np	nn	np	np	np	np	nn	nn	np	nn	nn	np	np	np	np	nn	nn	np	nn	nn	np	np	np	nn	nn	nn	nn	np	nn	nn	nn	nn	nn	nn	np	nn	nn	np
Marker2395	<nnxnp>	np	np	np	np	nn	nn	nn	nn	nn	np	nn	np	nn	nn	nn	nn	np	np	nn	np	np	nn	nn	nn	nn	np	np	nn	np	np	nn	nn	nn	np	nn	nn	np	nn	np	np	np	np	np	nn	nn	np	np	nn
Marker14053	<nnxnp>	nn	nn	nn	nn	np	np	np	np	np	nn	np	nn	np	np	np	np	nn	nn	np	nn	nn	np	np	np	np	nn	nn	np	nn	nn	np	np	np	nn	np	np	nn	np	nn	nn	nn	nn	nn	np	np	nn	nn	np
Marker17986	<nnxnp>	np	np	np	np	nn	nn	nn	nn	nn	np	nn	np	nn	nn	nn	nn	np	np	nn	np	np	nn	nn	nn	nn	np	np	nn	np	np	nn	nn	nn	nn	nn	nn	np	nn	nn	np	nn	np	np	nn	nn	nn	np	nn
Marker3134	<nnxnp>	np	np	np	np	nn	nn	nn	nn	nn	np	nn	np	nn	nn	nn	nn	np	np	nn	np	np	nn	nn	nn	nn	np	np	nn	np	np	nn	nn	nn	nn	nn	nn	np	nn	nn	np	nn	np	np	nn	nn	nn	np	nn
Marker11961	<lmxll>	ll	ll	ll	lm	ll	lm	lm	ll	ll	lm	ll	ll	ll	lm	ll	ll	lm	lm	lm	ll	lm	ll	lm	ll	lm	lm	ll	ll	lm	ll	lm	ll	ll	ll	ll	ll	lm	ll	ll	ll	ll	lm	ll	ll	ll	lm	lm	ll
Marker19835	<nnxnp>	nn	nn	nn	nn	np	np	np	np	np	nn	np	nn	np	np	np	np	nn	nn	np	nn	nn	nn	np	np	np	nn	nn	np	nn	np	np	np	np	nn	np	np	nn	np	nn	nn	nn	nn	nn	np	np	nn	nn	np
Marker60015	<nnxnp>	nn	nn	nn	nn	np	np	np	np	np	nn	np	nn	np	np	np	np	nn	nn	np	nn	nn	nn	np	np	np	nn	nn	np	nn	np	np	np	np	nn	np	np	nn	np	nn	nn	nn	nn	nn	np	np	nn	nn	np
Marker631	<lmxll>	ll	ll	ll	lm	ll	lm	lm	ll	ll	lm	ll	ll	ll	lm	ll	ll	lm	lm	lm	ll	lm	ll	lm	ll	lm	lm	ll	ll	lm	ll	lm	ll	ll	ll	ll	ll	lm	ll	ll	lm	ll	lm	lm	ll	ll	lm	lm	ll
Marker38444	<lmxll>	lm	lm	lm	ll	lm	ll	ll	lm	lm	ll	lm	lm	lm	ll	lm	lm	ll	ll	ll	lm	ll	lm	ll	lm	ll	ll	lm	lm	ll	lm	ll	lm	lm	lm	lm	lm	ll	lm	lm	ll	lm	ll	ll	lm	lm	ll	ll	lm
Marker3129	<lmxll>	lm	ll	lm	lm	lm	ll	ll	lm	lm	ll	lm	ll	ll	lm	ll	ll	lm	lm	lm	ll	lm	lm	lm	lm	lm	lm	lm	ll	lm	lm	lm	lm	lm	lm	ll	ll	lm	lm	lm	ll	lm	lm	ll	ll	lm	ll	ll	lm
Marker15749	<nnxnp>	nn	nn	nn	nn	np	np	np	np	np	nn	np	np	np	np	np	np	nn	nn	np	nn	nn	np	np	np	np	nn	nn	np	nn	np	np	np	np	np	np	np	nn	np	np	nn	np	nn	nn	np	np	nn	nn	np
Marker28330	<lmxll>	ll	lm	lm	ll	lm	ll	ll	lm	lm	ll	lm	lm	ll	ll	lm	lm	ll	ll	ll	lm	ll	lm	ll	lm	ll	ll	lm	lm	ll	lm	ll	lm	lm	lm	lm	lm	ll	lm	lm	ll	lm	ll	ll	lm	lm	ll	ll	lm
Marker36880	<abxcd>	bc	ac	ac	bc	ad	ad	ad	ac	ad	bc	bd	ad	--	bd	ad	--	bc	bc	bd	ac	bc	ac	bd	--	bd	bc	ac	ad	bc	ad	--	bd	bd	--	ad	bd	ac	--	--	bc	--	ac	ac	--	bd	bc	ac	--
Marker15743	<abxcd>	bd	ad	ad	bd	ac	--	ac	ac	--	ad	bc	--	ac	bc	ac	--	bd	ad	bc	ad	bd	bc	bc	bc	bc	--	ad	ac	ad	ad	--	bc	bc	--	--	--	bd	--	--	--	--	--	--	--	--	--	bd	--
Marker15742	<efxeg>	ef	ee	ee	ef	eg	eg	eg	ee	eg	ee	--	ee	eg	fg	eg	eg	ef	ee	--	ee	ef	fg	fg	fg	--	ef	ee	eg	ee	ee	--	fg	fg	ee	eg	--	ef	fg	ee	ef	ee	ef	fg	--	--	ee	--	ef
Marker32990	<nnxnp>	nn	nn	nn	nn	np	np	np	np	np	nn	np	np	np	np	np	np	nn	nn	np	nn	nn	nn	np	np	np	nn	nn	nn	nn	np	np	nn	np	nn	nn	np	nn	np	nn	nn	np	nn	nn	np	np	nn	nn	nn
Marker32998	<efxeg>	fg	eg	eg	--	--	ef	ef	ee	--	fg	--	ee	ee	ef	ef	ee	fg	fg	ef	eg	fg	eg	--	--	--	fg	eg	--	fg	ef	--	--	--	eg	ee	--	fg	--	eg	fg	--	--	fg	ee	ee	--	fg	fg
Marker30336	<lmxll>	lm	ll	ll	lm	ll	lm	lm	ll	ll	lm	ll	lm	ll	lm	ll	ll	lm	lm	lm	ll	lm	ll	lm	ll	lm	lm	ll	ll	lm	ll	lm	ll	lm	ll	ll	lm	lm	lm	ll	ll	ll	ll	ll	ll	lm	lm	lm	lm
Marker30339	<lmxll>	lm	ll	ll	lm	ll	lm	lm	ll	ll	lm	ll	lm	ll	lm	ll	ll	lm	lm	lm	ll	lm	ll	lm	ll	lm	lm	ll	ll	lm	ll	lm	ll	lm	ll	ll	lm	lm	lm	ll	ll	ll	ll	ll	ll	lm	lm	lm	lm
Marker4739	<lmxll>	lm	ll	ll	lm	ll	lm	lm	ll	ll	lm	ll	lm	ll	lm	ll	ll	lm	lm	lm	ll	lm	ll	lm	lm	lm	lm	ll	ll	lm	ll	lm	ll	lm	ll	ll	lm	lm	lm	ll	ll	ll	ll	ll	ll	lm	lm	lm	lm
Marker25535	<nnxnp>	nn	nn	nn	nn	np	np	np	np	np	np	np	np	np	nn	np	np	nn	nn	np	nn	nn	nn	np	np	np	nn	nn	nn	nn	np	np	nn	nn	nn	nn	np	nn	np	nn	nn	np	nn	nn	np	np	nn	nn	nn
Marker41142	<efxeg>	ee	ef	ee	ee	ee	ef	ee	ee	ee	ef	ee	ef	ef	ee	ef	ef	ee	ee	ee	ee	ee	--	--	--	ee	--	ee	ef	ee	ee	--	--	ee	--	ef	ef	ee	ee	--	ef	ee	ee	ef	--	--	ef	ef	ee
Marker15781	<lmxll>	lm	ll	ll	lm	ll	lm	lm	ll	ll	lm	ll	ll	lm	lm	ll	ll	lm	lm	lm	ll	lm	ll	lm	lm	lm	lm	ll	ll	lm	ll	lm	ll	ll	ll	ll	ll	lm	lm	ll	lm	ll	lm	lm	ll	ll	lm	lm	ll
Marker27538	<efxeg>	ee	ef	ee	ee	ee	ef	ee	ee	ee	ef	ee	ef	ef	ee	ef	ef	ee	ee	ee	ee	ee	ee	--	--	--	--	ee	ef	ee	ee	ee	ee	ee	--	ef	ef	ee	ee	--	ef	ee	ee	ef	--	--	ef	ef	ee
Marker32411	<efxeg>	ee	ef	ee	ee	ee	ef	ee	ee	ee	ef	ee	ef	ef	ee	ef	ef	ee	ee	ee	ee	--	ee	--	--	ee	--	ee	ef	ee	ee	ee	--	ee	--	ef	ef	ee	ee	--	ef	ee	ee	ef	--	--	ef	ef	ee
Marker257	<efxeg>	ee	ef	ee	ee	ee	ef	ee	ee	ee	ef	ee	ef	ef	ee	ef	ef	ee	ee	ee	ee	--	ee	--	ee	--	--	ee	ef	ee	ee	ee	--	ee	--	ef	ef	ee	--	--	ef	ee	ee	ef	--	--	ef	ef	ee
Marker7923	<lmxll>	lm	ll	ll	lm	ll	lm	lm	ll	ll	lm	ll	ll	ll	lm	ll	lm	lm	lm	lm	ll	lm	ll	lm	lm	lm	lm	ll	ll	lm	ll	lm	lm	lm	ll	ll	lm	lm	lm	ll	lm	ll	ll	ll	ll	lm	lm	lm	lm
Marker5248	<efxeg>	eg	eg	--	eg	ee	ee	ee	--	ee	ee	ee	ee	ee	eg	ee	--	eg	eg	ee	eg	--	eg	ee	--	ee	eg	eg	ee	eg	ee	--	ee	eg	--	--	ee	ee	ee	--	--	--	--	--	--	--	--	--	--
Marker2822	<lmxll>	ll	lm	lm	ll	lm	ll	ll	lm	lm	ll	ll	lm	lm	ll	lm	ll	ll	ll	ll	lm	ll	lm	ll	ll	ll	ll	lm	lm	ll	lm	ll	ll	ll	lm	lm	ll	ll	ll	lm	ll	lm	lm	ll	lm	ll	ll	ll	ll
Marker24402	<nnxnp>	np	np	nn	np	nn	nn	nn	nn	nn	nn	nn	nn	nn	np	nn	nn	np	np	nn	np	np	np	nn	nn	nn	np	np	np	np	nn	nn	np	np	np	np	nn	nn	nn	nn	np	np	np	np	nn	np	nn	nn	np
Marker24395	<nnxnp>	nn	nn	np	nn	np	np	np	np	np	np	np	np	nn	nn	np	np	nn	nn	np	nn	nn	nn	np	np	np	nn	nn	np	nn	np	np	nn	nn	nn	nn	np	np	np	np	nn	nn	nn	nn	np	nn	np	np	nn
Marker24327	<lmxll>	ll	lm	lm	ll	lm	ll	ll	lm	lm	ll	lm	lm	lm	ll	lm	ll	ll	ll	ll	lm	ll	lm	ll	ll	ll	ll	lm	lm	ll	lm	ll	ll	ll	lm	lm	lm	ll	ll	lm	ll	lm	ll	ll	lm	lm	ll	ll	lm
Marker43433	<nnxnp>	np	np	nn	np	nn	nn	nn	nn	nn	nn	nn	nn	np	np	nn	nn	np	np	nn	np	np	np	nn	nn	nn	np	np	np	np	nn	nn	np	np	np	np	nn	nn	nn	nn	np	np	np	np	nn	np	nn	nn	np
Marker24324	<lmxll>	ll	lm	lm	ll	lm	ll	ll	lm	lm	ll	lm	lm	lm	ll	lm	ll	ll	ll	ll	lm	ll	lm	ll	ll	ll	ll	lm	lm	ll	lm	ll	ll	ll	lm	lm	lm	ll	ll	lm	ll	lm	ll	ll	lm	lm	ll	ll	lm
Marker17069	<nnxnp>	np	np	nn	np	nn	nn	nn	nn	nn	nn	nn	nn	nn	np	nn	nn	np	np	nn	np	np	np	nn	nn	nn	np	np	nn	np	nn	nn	np	np	np	np	nn	nn	nn	nn	np	np	np	np	nn	np	np	np	np
Marker43432	<lmxll>	ll	lm	lm	ll	lm	ll	ll	lm	lm	ll	lm	lm	lm	ll	lm	ll	ll	ll	ll	lm	ll	lm	ll	ll	ll	ll	lm	lm	ll	lm	ll	ll	ll	lm	lm	lm	ll	ll	lm	ll	lm	ll	ll	lm	ll	ll	ll	lm
Marker2722	<nnxnp>	np	np	nn	np	nn	nn	nn	nn	nn	nn	nn	nn	nn	np	nn	nn	np	np	nn	np	np	np	nn	nn	nn	np	np	nn	np	nn	nn	np	np	np	np	nn	nn	nn	nn	np	np	np	np	nn	np	np	np	np
Marker211	<nnxnp>	np	np	nn	np	nn	nn	nn	nn	nn	nn	nn	nn	nn	np	nn	nn	np	np	nn	np	np	np	nn	nn	nn	np	np	nn	np	nn	nn	np	np	np	np	nn	nn	nn	np	np	np	np	np	nn	np	np	np	np
Marker35276	<efxeg>	--	eg	ee	--	ee	ef	ef	ee	ee	ef	ef	ee	ee	fg	ee	ef	fg	--	ef	eg	fg	eg	ef	ef	ef	--	eg	ee	fg	ee	ef	fg	fg	eg	--	ef	ef	ef	eg	--	eg	fg	fg	ee	--	ef	fg	--
Marker40966	<efxeg>	ee	ef	fg	ee	fg	eg	eg	fg	fg	eg	fg	fg	--	ee	fg	--	ee	ee	eg	ef	ee	ef	eg	ee	eg	ee	ef	fg	ee	fg	ee	--	ee	--	ee	--	eg	eg	fg	ee	--	--	ee	--	ee	eg	ee	ee
Marker9069	<efxeg>	ef	ee	eg	ef	eg	fg	fg	eg	eg	fg	eg	--	eg	ef	eg	--	ef	ef	fg	ee	ef	ee	fg	--	fg	ef	ee	eg	ef	eg	--	--	ef	ee	ee	--	--	--	--	ef	ee	--	ee	--	--	--	ef	ee
Marker7900	<efxeg>	ef	ee	eg	ef	eg	fg	fg	--	eg	fg	eg	--	eg	ef	eg	--	ef	ef	fg	ee	ef	ee	fg	--	fg	ef	ee	eg	--	eg	--	--	ef	ee	ee	--	--	--	--	ef	ee	--	ee	--	--	--	ef	ee
Marker15217	<lmxll>	lm	ll	ll	lm	ll	lm	lm	ll	ll	lm	ll	ll	ll	lm	ll	lm	lm	lm	lm	ll	lm	ll	lm	lm	lm	lm	ll	ll	lm	ll	lm	lm	lm	ll	ll	lm	lm	lm	ll	lm	ll	lm	ll	ll	lm	lm	lm	lm
Marker17862	<lmxll>	ll	lm	lm	ll	lm	ll	ll	lm	lm	ll	lm	lm	lm	ll	lm	ll	ll	ll	ll	lm	ll	lm	ll	ll	ll	ll	lm	lm	ll	lm	ll	ll	ll	lm	lm	ll	ll	ll	lm	ll	lm	ll	lm	lm	ll	ll	ll	ll
Marker35070	<lmxll>	ll	lm	lm	ll	lm	ll	ll	lm	lm	ll	lm	lm	lm	ll	lm	ll	ll	ll	ll	lm	ll	lm	ll	ll	ll	ll	lm	lm	ll	lm	ll	ll	ll	lm	lm	ll	ll	ll	lm	ll	lm	ll	ll	lm	ll	ll	ll	ll
Marker25511	<lmxll>	ll	lm	lm	ll	lm	ll	ll	lm	lm	ll	lm	lm	lm	ll	lm	ll	ll	ll	ll	lm	ll	lm	ll	ll	ll	ll	lm	lm	ll	lm	ll	ll	ll	lm	lm	ll	ll	ll	lm	ll	lm	ll	ll	lm	ll	ll	ll	ll
Marker40205	<lmxll>	ll	lm	lm	ll	lm	ll	ll	lm	lm	ll	lm	lm	lm	ll	lm	ll	ll	ll	ll	lm	ll	lm	ll	ll	ll	ll	lm	lm	ll	lm	ll	ll	ll	lm	lm	ll	ll	ll	lm	ll	lm	ll	ll	lm	ll	ll	ll	ll
Marker25537	<lmxll>	lm	ll	ll	lm	ll	lm	lm	ll	ll	lm	ll	ll	ll	lm	ll	lm	lm	lm	lm	ll	lm	ll	lm	lm	lm	lm	ll	ll	lm	ll	lm	lm	lm	ll	ll	lm	lm	lm	ll	lm	ll	lm	lm	ll	lm	lm	lm	lm
Marker15339	<lmxll>	ll	lm	lm	ll	lm	ll	ll	lm	lm	ll	lm	lm	lm	ll	lm	ll	ll	ll	ll	lm	ll	lm	ll	ll	ll	ll	lm	lm	ll	lm	ll	ll	ll	lm	lm	ll	ll	ll	lm	ll	lm	ll	ll	lm	ll	ll	ll	ll
Marker25516	<lmxll>	ll	lm	lm	ll	lm	ll	ll	lm	lm	ll	lm	lm	lm	ll	lm	ll	ll	ll	ll	lm	ll	lm	ll	ll	ll	ll	lm	lm	ll	lm	ll	ll	ll	lm	lm	ll	ll	ll	lm	ll	lm	ll	ll	lm	ll	ll	ll	ll
Marker63480	<nnxnp>	np	np	nn	np	nn	nn	nn	nn	nn	nn	nn	nn	nn	np	nn	nn	np	np	nn	np	np	np	nn	nn	nn	np	np	nn	np	nn	nn	np	np	np	np	nn	nn	nn	nn	np	np	np	np	nn	np	nn	np	np
Marker43104	<abxcd>	ac	bc	bd	--	bd	ad	ad	bd	bd	ad	bd	bd	bd	--	bd	ad	ac	--	ad	--	ac	bc	ad	--	ad	ac	bc	bd	ac	bd	--	ac	ac	bc	bc	--	ad	ad	bd	ac	bc	ac	ac	bd	ad	--	ac	--
Marker42741	<nnxnp>	np	np	nn	np	nn	nn	nn	nn	nn	nn	nn	nn	nn	np	nn	nn	np	np	nn	np	np	np	nn	nn	nn	np	np	nn	np	nn	nn	np	np	np	np	nn	nn	nn	np	np	np	np	np	nn	nn	nn	np	np
Marker30805	<lmxll>	ll	lm	lm	ll	lm	ll	ll	lm	lm	ll	lm	lm	lm	ll	lm	ll	ll	ll	ll	lm	ll	lm	ll	ll	ll	ll	lm	lm	ll	lm	ll	ll	ll	lm	lm	ll	ll	ll	lm	ll	ll	ll	ll	lm	ll	ll	ll	ll
Marker11974	<lmxll>	lm	ll	ll	lm	ll	lm	lm	ll	ll	lm	ll	ll	ll	lm	ll	lm	lm	lm	lm	ll	lm	ll	lm	lm	lm	lm	ll	ll	lm	ll	lm	lm	lm	ll	ll	lm	lm	lm	ll	lm	lm	lm	lm	ll	lm	lm	lm	lm
Marker15321	<lmxll>	lm	ll	ll	lm	ll	lm	lm	ll	ll	lm	ll	ll	ll	lm	ll	lm	lm	lm	lm	ll	lm	ll	lm	lm	lm	lm	ll	ll	lm	ll	lm	lm	lm	ll	ll	lm	lm	lm	ll	lm	lm	lm	lm	ll	lm	lm	lm	lm
Marker58467	<nnxnp>	nn	nn	np	nn	np	np	np	np	np	np	np	np	np	nn	np	np	nn	nn	np	nn	nn	nn	np	np	np	nn	nn	np	nn	np	np	np	nn	nn	nn	np	np	np	np	nn	nn	nn	nn	np	np	np	nn	nn
Marker15238	<nnxnp>	nn	nn	np	nn	np	np	np	np	np	np	np	np	np	nn	np	np	nn	nn	np	nn	nn	nn	np	np	np	nn	nn	np	nn	np	np	nn	nn	nn	nn	np	np	np	np	nn	nn	nn	nn	np	np	np	nn	nn
Marker60961	<nnxnp>	nn	nn	np	nn	np	np	np	np	np	np	np	np	np	nn	np	np	nn	nn	np	nn	nn	nn	np	np	np	nn	nn	np	nn	np	np	nn	nn	nn	nn	np	np	np	np	nn	nn	nn	nn	np	np	np	nn	nn
Marker2358	<lmxll>	lm	ll	lm	lm	ll	lm	lm	ll	ll	lm	ll	ll	ll	lm	ll	lm	lm	lm	lm	ll	lm	ll	lm	lm	lm	lm	ll	ll	lm	ll	lm	lm	lm	ll	ll	lm	lm	lm	ll	lm	ll	lm	lm	ll	lm	lm	lm	lm
Marker36512	<lmxll>	lm	ll	lm	lm	ll	lm	lm	ll	ll	lm	ll	ll	ll	lm	ll	lm	lm	lm	lm	ll	lm	ll	lm	lm	lm	lm	ll	ll	lm	ll	lm	lm	lm	ll	ll	lm	lm	lm	ll	lm	ll	lm	lm	ll	lm	lm	lm	lm
Marker39117	<lmxll>	lm	ll	lm	lm	ll	lm	lm	ll	ll	lm	ll	ll	ll	lm	ll	lm	lm	lm	lm	ll	lm	ll	lm	lm	lm	lm	ll	ll	lm	ll	lm	lm	lm	ll	ll	lm	lm	lm	ll	lm	ll	lm	lm	ll	lm	lm	lm	lm
Marker41356	<lmxll>	lm	ll	lm	lm	ll	lm	lm	ll	ll	lm	ll	ll	ll	lm	ll	lm	lm	lm	lm	ll	lm	ll	lm	lm	lm	lm	ll	ll	lm	ll	lm	lm	lm	ll	ll	lm	lm	lm	ll	lm	ll	lm	lm	ll	lm	lm	lm	lm
Marker7922	<efxeg>	ee	ef	fg	ee	fg	eg	eg	fg	fg	eg	--	--	fg	ee	--	--	--	ee	eg	ef	--	ef	eg	eg	eg	ee	ef	ef	ee	fg	--	ee	ee	--	ef	eg	eg	--	--	ee	ef	ee	ee	--	ee	ee	ee	ee
Marker15317	<nnxnp>	np	np	nn	np	nn	nn	nn	nn	nn	nn	nn	nn	nn	np	nn	nn	np	np	nn	np	np	np	nn	nn	nn	np	np	nn	np	nn	nn	nn	np	np	np	nn	nn	nn	nn	np	np	np	np	nn	nn	nn	np	np
Marker38846	<lmxll>	lm	ll	ll	lm	ll	lm	lm	ll	ll	lm	ll	ll	ll	lm	ll	lm	lm	lm	lm	ll	lm	ll	lm	lm	lm	lm	ll	ll	lm	ll	lm	lm	lm	ll	ll	lm	lm	lm	ll	lm	ll	lm	lm	ll	lm	lm	lm	lm
Marker31479	<lmxll>	lm	ll	ll	lm	ll	lm	lm	ll	ll	lm	ll	ll	ll	lm	ll	lm	lm	lm	lm	ll	lm	ll	lm	lm	lm	lm	ll	ll	lm	ll	lm	lm	lm	ll	ll	lm	lm	lm	ll	lm	lm	lm	lm	ll	lm	lm	lm	lm
Marker18024	<efxeg>	fg	eg	ef	fg	ee	--	ef	ee	--	ef	ee	ee	ee	fg	ee	--	fg	fg	--	eg	fg	eg	ef	ef	ef	fg	eg	ee	--	ee	--	fg	--	eg	eg	ef	ef	ee	ee	fg	--	fg	fg	ee	ef	ef	fg	fg
Marker38427	<lmxll>	ll	lm	lm	ll	lm	ll	ll	lm	lm	ll	lm	lm	lm	ll	lm	ll	ll	ll	ll	lm	ll	lm	ll	ll	ll	ll	lm	lm	ll	lm	ll	ll	ll	lm	lm	ll	ll	ll	lm	ll	ll	ll	ll	lm	ll	ll	ll	ll
Marker60962	<nnxnp>	nn	nn	np	nn	np	np	np	np	np	np	np	np	np	nn	np	np	nn	nn	np	nn	nn	nn	np	np	np	nn	nn	np	nn	np	np	nn	nn	nn	nn	np	np	np	np	nn	nn	nn	nn	np	np	np	nn	nn
Marker40846	<lmxll>	ll	lm	lm	ll	lm	ll	ll	lm	lm	ll	lm	lm	lm	ll	ll	ll	ll	ll	ll	lm	ll	lm	ll	ll	ll	ll	lm	lm	ll	lm	ll	ll	ll	lm	lm	ll	ll	ll	lm	ll	ll	ll	ll	lm	ll	ll	ll	ll
Marker40157	<nnxnp>	np	np	nn	np	nn	nn	nn	nn	nn	nn	nn	nn	nn	np	nn	nn	np	np	nn	np	np	np	nn	nn	nn	np	np	nn	np	nn	nn	np	np	np	np	nn	nn	nn	nn	np	np	np	np	nn	nn	nn	np	np
Marker14956	<nnxnp>	np	np	nn	np	nn	nn	nn	nn	nn	nn	nn	nn	nn	np	nn	nn	np	np	nn	np	np	np	nn	nn	nn	np	np	nn	np	nn	nn	np	np	np	np	nn	nn	nn	nn	np	np	np	np	nn	nn	nn	np	np
Marker30342	<lmxll>	ll	lm	ll	ll	lm	ll	ll	lm	lm	ll	lm	lm	lm	ll	ll	ll	ll	ll	ll	lm	ll	lm	ll	ll	ll	ll	lm	lm	ll	lm	ll	ll	ll	lm	lm	ll	ll	ll	lm	ll	ll	ll	ll	lm	ll	ll	ll	ll
Marker34254	<abxcd>	--	bc	--	ac	bd	--	--	--	bd	--	ad	bd	--	ac	bd	--	ac	--	ad	bc	--	bc	ad	--	ad	--	--	--	--	--	--	--	--	--	--	--	--	ad	--	--	--	--	ad	--	--	--	--	--
Marker2377	<efxeg>	eg	fg	ef	eg	ef	ee	ee	ef	ef	ee	ef	ef	ef	--	ef	--	eg	eg	ee	fg	eg	fg	ee	ee	ee	eg	fg	ef	eg	--	ee	eg	eg	--	--	--	ee	ef	ef	--	ee	ee	--	--	ee	ee	eg	--
Marker2378	<nnxnp>	nn	nn	np	nn	np	np	np	np	np	np	np	np	np	nn	np	np	nn	nn	np	nn	nn	nn	np	np	np	nn	nn	np	nn	np	np	nn	nn	nn	nn	np	np	np	np	nn	nn	nn	nn	np	np	np	nn	nn
Marker11964	<lmxll>	lm	ll	ll	lm	ll	lm	lm	ll	ll	lm	lm	ll	ll	lm	ll	lm	lm	lm	lm	ll	lm	ll	lm	lm	lm	lm	ll	ll	lm	ll	lm	lm	lm	ll	ll	lm	lm	lm	ll	lm	lm	lm	lm	ll	lm	lm	lm	lm
Marker36888	<efxeg>	--	ee	ee	--	eg	eg	eg	eg	eg	--	ef	eg	eg	--	eg	--	ef	ef	--	ee	ef	eg	--	--	--	ef	ee	eg	ef	eg	fg	--	--	eg	eg	--	ef	--	--	--	eg	--	ef	eg	fg	--	ef	--
Marker19501	<lmxll>	ll	lm	lm	ll	lm	ll	ll	lm	lm	ll	ll	lm	lm	ll	lm	ll	ll	ll	ll	lm	ll	lm	ll	ll	ll	ll	lm	lm	ll	lm	ll	ll	ll	lm	lm	ll	ll	ll	lm	ll	ll	ll	ll	lm	ll	ll	ll	ll
Marker32327	<lmxll>	lm	ll	ll	lm	ll	lm	lm	ll	ll	lm	lm	ll	ll	lm	ll	lm	lm	lm	lm	ll	lm	ll	lm	lm	lm	lm	ll	ll	lm	ll	lm	lm	lm	ll	ll	lm	lm	lm	ll	lm	lm	lm	lm	ll	lm	lm	lm	lm
Marker43049	<lmxll>	ll	lm	lm	ll	lm	ll	ll	lm	lm	ll	ll	lm	lm	ll	lm	ll	ll	ll	ll	lm	ll	lm	ll	ll	ll	ll	lm	lm	ll	lm	ll	ll	ll	lm	lm	ll	ll	ll	lm	ll	ll	ll	ll	lm	ll	ll	ll	ll
Marker30691	<lmxll>	ll	lm	lm	ll	lm	ll	ll	lm	lm	ll	ll	lm	lm	ll	lm	ll	ll	ll	ll	lm	ll	lm	ll	ll	ll	ll	lm	lm	ll	lm	ll	ll	ll	lm	lm	ll	ll	ll	lm	ll	ll	ll	ll	lm	ll	ll	ll	ll
Marker33001	<lmxll>	ll	lm	lm	ll	lm	ll	ll	lm	lm	ll	ll	lm	lm	ll	lm	ll	ll	ll	ll	lm	ll	lm	ll	ll	ll	ll	lm	lm	ll	lm	ll	ll	ll	lm	lm	ll	ll	ll	lm	ll	ll	ll	ll	lm	ll	ll	ll	ll
Marker14251	<nnxnp>	np	np	nn	np	nn	nn	nn	nn	nn	nn	nn	nn	nn	np	nn	nn	np	np	nn	np	np	np	nn	nn	nn	np	np	nn	np	nn	nn	np	np	np	np	nn	nn	nn	nn	np	np	np	np	nn	nn	nn	np	np
Marker5203	<lmxll>	ll	lm	lm	ll	lm	ll	ll	lm	lm	ll	ll	lm	lm	ll	lm	ll	ll	ll	ll	lm	ll	lm	ll	ll	ll	ll	lm	lm	ll	lm	ll	ll	ll	lm	lm	ll	ll	ll	lm	ll	ll	ll	ll	lm	ll	ll	ll	ll
Marker11963	<nnxnp>	np	np	nn	np	nn	nn	nn	nn	nn	nn	nn	nn	nn	np	nn	nn	np	np	nn	np	np	np	nn	nn	nn	np	np	nn	np	nn	nn	np	np	np	np	nn	nn	nn	nn	np	np	np	np	nn	nn	nn	np	np
Marker7940	<nnxnp>	nn	nn	np	nn	np	np	np	np	np	np	np	np	np	nn	np	np	nn	nn	np	nn	nn	nn	np	np	np	nn	nn	np	nn	np	np	nn	nn	nn	nn	np	np	np	np	nn	nn	nn	nn	np	np	np	nn	nn
Marker35764	<nnxnp>	np	np	nn	np	nn	nn	nn	nn	nn	nn	nn	nn	nn	np	nn	nn	np	np	nn	np	np	np	nn	nn	nn	np	np	nn	np	nn	nn	np	np	np	np	nn	nn	nn	nn	np	np	np	np	nn	nn	nn	np	np
Marker5831	<lmxll>	ll	lm	lm	ll	lm	ll	ll	lm	lm	ll	ll	lm	lm	ll	lm	ll	ll	ll	ll	lm	ll	lm	ll	ll	ll	ll	lm	lm	ll	lm	ll	ll	ll	lm	lm	ll	ll	ll	lm	ll	ll	ll	ll	lm	ll	ll	ll	ll
Marker43962	<lmxll>	ll	lm	lm	ll	lm	lm	lm	lm	lm	ll	ll	lm	lm	ll	lm	ll	ll	ll	ll	lm	ll	lm	ll	ll	ll	ll	lm	lm	ll	lm	ll	ll	ll	lm	lm	ll	ll	ll	lm	ll	ll	ll	ll	lm	ll	ll	ll	ll
Marker3043	<lmxll>	ll	lm	lm	ll	lm	lm	lm	lm	lm	ll	ll	lm	lm	ll	lm	ll	ll	ll	ll	lm	ll	lm	ll	ll	ll	ll	lm	lm	ll	lm	ll	ll	ll	lm	lm	ll	ll	ll	lm	ll	ll	ll	ll	lm	ll	ll	ll	ll
Marker33812	<lmxll>	lm	ll	ll	lm	ll	lm	lm	ll	ll	lm	lm	ll	ll	lm	ll	lm	lm	lm	lm	ll	lm	ll	lm	lm	lm	lm	ll	ll	lm	ll	lm	lm	lm	ll	ll	lm	lm	lm	ll	lm	lm	ll	ll	ll	lm	lm	lm	lm
Marker36882	<lmxll>	lm	ll	ll	lm	ll	ll	ll	ll	ll	lm	lm	ll	ll	lm	ll	lm	lm	lm	lm	ll	lm	ll	lm	lm	lm	lm	ll	ll	lm	ll	lm	lm	lm	ll	ll	lm	lm	lm	ll	lm	lm	lm	lm	ll	lm	lm	lm	lm
Marker14084	<lmxll>	lm	ll	ll	lm	ll	ll	ll	ll	ll	ll	lm	ll	ll	lm	ll	ll	lm	ll	lm	ll	lm	lm	lm	lm	lm	lm	ll	ll	ll	ll	lm	lm	lm	ll	ll	ll	lm	lm	ll	lm	lm	lm	lm	ll	lm	ll	lm	lm
Marker40545	<lmxll>	ll	lm	lm	ll	lm	ll	ll	lm	lm	ll	ll	lm	lm	ll	lm	ll	ll	ll	ll	lm	ll	lm	ll	lm	ll	ll	lm	lm	ll	lm	ll	ll	ll	lm	lm	ll	ll	ll	lm	ll	ll	lm	lm	lm	ll	ll	ll	ll
Marker21383	<nnxnp>	nn	np	nn	np	nn	nn	nn	nn	nn	nn	nn	nn	nn	np	nn	nn	np	np	nn	np	np	np	nn	nn	nn	np	np	nn	np	nn	nn	np	np	np	np	nn	nn	nn	nn	np	np	nn	np	nn	nn	nn	nn	np
Marker2650	<efxeg>	ee	--	--	--	--	ef	--	--	--	--	ee	ef	ef	ee	ef	--	ee	--	ee	--	ee	fg	--	--	ee	ee	--	--	--	ef	--	ee	--	--	--	--	ee	ee	--	ee	ee	--	--	--	--	--	--	--
Marker18003	<lmxll>	ll	lm	lm	ll	lm	lm	lm	lm	lm	lm	ll	lm	lm	ll	lm	ll	ll	lm	ll	lm	ll	ll	ll	ll	ll	ll	lm	lm	lm	lm	ll	ll	ll	lm	lm	lm	ll	ll	lm	ll	ll	ll	ll	lm	ll	ll	ll	ll
Marker17987	<lmxll>	ll	lm	lm	ll	lm	lm	lm	lm	lm	lm	ll	lm	lm	ll	lm	ll	ll	lm	ll	lm	ll	ll	ll	ll	ll	ll	lm	lm	lm	lm	ll	ll	ll	lm	lm	lm	ll	ll	lm	ll	ll	ll	ll	lm	ll	ll	ll	ll
Marker14080	<lmxll>	ll	lm	lm	ll	lm	lm	lm	lm	lm	lm	ll	lm	lm	ll	lm	ll	ll	lm	ll	lm	ll	ll	ll	ll	ll	ll	lm	lm	lm	lm	ll	ll	ll	lm	lm	lm	ll	ll	lm	ll	ll	ll	ll	lm	ll	ll	ll	ll
Marker35060	<lmxll>	ll	lm	lm	ll	lm	lm	lm	lm	lm	lm	ll	lm	lm	ll	lm	ll	ll	lm	ll	lm	ll	ll	ll	ll	ll	ll	lm	lm	lm	lm	ll	ll	ll	lm	lm	lm	ll	ll	lm	ll	ll	ll	ll	lm	ll	ll	ll	ll
Marker7914	<nnxnp>	nn	np	nn	np	nn	nn	nn	nn	nn	nn	nn	nn	nn	np	nn	nn	np	np	nn	np	np	np	nn	nn	nn	np	np	nn	np	nn	nn	np	np	np	np	nn	nn	nn	nn	np	np	nn	np	nn	nn	nn	nn	np
Marker30348	<efxeg>	--	eg	ee	eg	ee	--	ee	ee	ee	ee	ee	ee	ee	--	ee	--	eg	--	ee	eg	--	eg	ee	--	ee	eg	eg	ee	--	ee	--	--	--	--	eg	--	--	--	--	--	--	--	eg	ee	--	--	--	--
Marker15747	<efxeg>	ee	ef	ef	ee	ef	ef	ef	ef	ef	ef	ee	ef	ef	ee	ef	ee	ee	ef	ee	ef	--	ee	ee	ee	ee	ee	ef	ef	ef	ef	ee	--	ee	ef	ef	--	ee	ee	--	ee	ee	ee	ee	ef	--	ee	ee	ee
Marker26269	<efxeg>	ee	ee	ee	ef	eg	ee	eg	ee	ee	ef	--	ee	eg	--	ee	ef	--	ef	ef	eg	ef	ee	eg	eg	ef	--	ee	ee	ef	eg	ef	ef	eg	eg	eg	ef	ef	--	eg	eg	--	--	--	--	ef	ef	ef	ef
Marker15219	<lmxll>	lm	lm	lm	lm	lm	ll	ll	lm	lm	ll	lm	lm	lm	lm	lm	ll	lm	lm	lm	lm	lm	ll	ll	ll	ll	lm	lm	lm	lm	lm	lm	ll	lm	ll	lm	lm	ll	ll	lm	lm	lm	ll	lm	ll	ll	ll	lm	ll
Marker2355	<lmxll>	lm	lm	lm	lm	lm	ll	ll	lm	lm	ll	lm	lm	lm	lm	lm	ll	lm	lm	ll	lm	lm	ll	ll	ll	ll	lm	lm	lm	lm	lm	lm	ll	lm	ll	lm	lm	ll	ll	lm	lm	lm	ll	lm	lm	ll	ll	lm	ll
Marker14835	<nnxnp>	nn	nn	nn	nn	np	np	np	nn	nn	nn	np	np	np	np	nn	nn	np	np	np	nn	nn	nn	nn	nn	np	nn	np	nn	nn	nn	np	np	np	nn	np	nn	np	np	np	np	np	np	nn	nn	nn	np	np	nn
Marker10277	<nnxnp>	np	np	np	np	nn	nn	nn	nn	np	np	nn	nn	nn	nn	np	np	nn	nn	nn	np	np	np	np	np	nn	np	nn	np	np	np	nn	nn	nn	np	nn	np	nn	nn	nn	nn	nn	nn	np	np	np	nn	nn	np
Marker8581	<nnxnp>	nn	nn	nn	nn	np	np	np	np	nn	nn	np	np	np	np	nn	nn	np	np	np	nn	nn	nn	nn	nn	np	nn	np	np	nn	nn	np	np	np	nn	np	nn	np	np	np	nn	np	np	nn	nn	nn	np	np	nn
Marker16564	<nnxnp>	nn	nn	nn	nn	np	np	np	np	nn	nn	np	np	np	np	nn	nn	np	np	np	nn	nn	nn	nn	nn	np	nn	np	np	nn	nn	np	np	np	np	np	np	np	np	np	nn	np	np	nn	nn	nn	np	np	nn
Marker61776	<nnxnp>	nn	nn	nn	nn	np	np	np	np	nn	nn	np	np	np	np	nn	nn	np	np	np	nn	nn	nn	nn	nn	np	nn	np	np	nn	nn	np	np	np	np	np	np	np	np	np	nn	np	np	nn	nn	nn	np	np	nn
Marker33165	<nnxnp>	nn	nn	nn	nn	np	np	np	np	nn	nn	np	np	np	np	nn	nn	np	np	np	nn	nn	nn	nn	nn	np	nn	np	np	nn	nn	np	np	np	np	np	np	np	np	np	nn	np	np	nn	nn	nn	np	np	nn
Marker50890	<nnxnp>	nn	nn	nn	nn	np	np	np	np	nn	nn	np	np	np	np	nn	nn	np	np	np	nn	nn	nn	nn	nn	np	nn	np	np	nn	nn	np	np	np	np	np	np	np	np	np	nn	np	np	nn	nn	nn	np	nn	nn
Marker8584	<nnxnp>	np	np	np	np	nn	nn	nn	np	np	np	nn	nn	nn	nn	np	np	nn	nn	nn	np	np	np	np	np	nn	np	nn	nn	np	np	nn	nn	nn	nn	nn	nn	nn	nn	nn	np	nn	nn	np	np	np	nn	np	np
Marker10279	<nnxnp>	np	np	np	np	nn	nn	nn	np	np	np	nn	nn	nn	nn	np	np	nn	nn	nn	np	np	np	np	np	nn	np	nn	nn	np	np	nn	nn	nn	nn	nn	nn	nn	nn	nn	np	nn	nn	np	np	np	nn	np	np
Marker10281	<nnxnp>	np	np	np	np	nn	np	nn	np	np	np	nn	nn	nn	nn	np	np	nn	nn	nn	np	np	np	np	np	nn	np	nn	nn	np	np	nn	nn	nn	nn	nn	nn	nn	nn	nn	np	nn	nn	np	np	np	nn	np	np
Marker14834	<lmxll>	lm	lm	lm	lm	lm	ll	ll	lm	ll	lm	lm	ll	ll	ll	lm	lm	lm	ll	ll	lm	lm	ll	lm	ll	lm	lm	ll	ll	lm	ll	ll	ll	ll	ll	ll	ll	ll	ll	ll	ll	ll	ll	lm	lm	lm	ll	lm	lm
Marker14031	<nnxnp>	np	np	nn	np	nn	np	nn	nn	np	np	nn	nn	nn	nn	np	nn	nn	nn	nn	np	np	np	np	np	nn	np	nn	nn	np	np	nn	nn	nn	nn	nn	nn	nn	nn	nn	np	nn	nn	np	np	np	nn	np	np
Marker37718	<nnxnp>	nn	nn	np	nn	np	nn	np	np	nn	nn	np	np	np	np	nn	np	np	np	np	nn	nn	nn	nn	nn	np	nn	np	np	nn	nn	np	np	np	np	np	np	np	np	np	nn	np	np	nn	nn	nn	np	nn	nn
Marker37723	<lmxll>	ll	ll	ll	ll	ll	lm	lm	ll	lm	ll	ll	lm	lm	lm	ll	ll	ll	lm	lm	ll	ll	lm	ll	lm	ll	ll	lm	lm	ll	lm	lm	lm	lm	lm	lm	lm	lm	lm	lm	lm	lm	lm	ll	ll	ll	lm	ll	ll
Marker7412	<lmxll>	ll	lm	ll	ll	ll	lm	lm	ll	lm	ll	ll	lm	lm	lm	ll	ll	ll	lm	lm	ll	ll	lm	ll	lm	ll	ll	lm	lm	ll	lm	lm	lm	lm	lm	lm	lm	lm	lm	lm	lm	lm	lm	lm	ll	ll	lm	ll	ll
Marker31236	<efxeg>	eg	--	--	eg	ee	ef	ef	eg	eg	eg	ee	ef	ee	ef	eg	ef	ee	ef	ef	ef	eg	ef	eg	--	eg	eg	ef	ef	eg	--	ee	--	--	ee	ee	ee	ef	ef	ef	ef	ef	ee	--	ee	ee	ef	eg	eg
Marker41207	<lmxll>	lm	ll	ll	lm	lm	ll	ll	lm	ll	lm	lm	ll	ll	ll	lm	ll	lm	ll	ll	ll	lm	ll	lm	ll	lm	lm	ll	ll	lm	ll	lm	ll	ll	lm	ll	lm	ll	ll	ll	ll	ll	ll	ll	ll	ll	ll	lm	lm
Marker40646	<efxeg>	ef	ee	ee	ef	ef	ee	ee	ef	ee	ef	ef	--	ee	ee	ef	ee	ef	ee	ee	ee	ef	ee	ef	ee	ef	ef	ee	ee	ef	ee	--	ee	ee	--	ee	ef	ee	ee	ee	ee	ee	ee	ee	ee	ee	ee	--	ee
Marker40656	<efxeg>	ee	ef	ef	ee	eg	--	--	ee	ee	ee	eg	--	--	--	ee	--	eg	--	--	ef	--	ef	ee	ef	eg	ee	--	--	ee	ef	--	--	ef	ee	ef	eg	--	--	ef	--	ef	--	ef	eg	ee	--	ee	ee
Marker10278	<lmxll>	lm	ll	ll	lm	lm	ll	ll	lm	lm	lm	lm	ll	ll	ll	lm	ll	ll	ll	ll	ll	lm	ll	lm	ll	lm	lm	ll	ll	lm	ll	lm	ll	ll	lm	ll	lm	ll	ll	ll	ll	ll	ll	ll	ll	ll	ll	lm	lm
Marker27580	<lmxll>	lm	ll	ll	lm	lm	ll	ll	lm	lm	lm	lm	ll	ll	ll	lm	ll	ll	ll	ll	ll	lm	ll	lm	ll	lm	lm	ll	ll	lm	ll	lm	ll	ll	lm	ll	lm	ll	ll	ll	ll	ll	ll	ll	ll	ll	ll	lm	lm
Marker10287	<lmxll>	lm	ll	ll	lm	lm	ll	ll	lm	ll	lm	lm	ll	ll	ll	lm	lm	lm	ll	ll	ll	lm	ll	lm	ll	lm	lm	ll	ll	lm	ll	ll	ll	ll	ll	ll	ll	ll	ll	ll	ll	ll	ll	ll	lm	lm	ll	lm	lm
Marker31249	<lmxll>	ll	lm	lm	ll	ll	lm	lm	ll	ll	ll	ll	lm	lm	lm	ll	ll	ll	lm	lm	lm	ll	lm	ll	lm	ll	ll	lm	lm	ll	lm	ll	lm	lm	lm	lm	ll	lm	lm	lm	lm	lm	lm	lm	ll	ll	lm	ll	ll
Marker12404	<lmxll>	ll	lm	lm	ll	ll	lm	lm	ll	ll	ll	ll	lm	lm	lm	ll	ll	ll	lm	lm	lm	ll	lm	ll	lm	ll	ll	lm	lm	ll	lm	ll	lm	lm	lm	lm	ll	lm	lm	lm	lm	lm	lm	lm	ll	ll	lm	ll	ll
Marker39491	<lmxll>	lm	ll	ll	lm	lm	ll	ll	lm	ll	lm	lm	ll	ll	ll	lm	lm	lm	ll	ll	ll	lm	ll	lm	ll	lm	lm	ll	ll	lm	ll	lm	ll	ll	ll	ll	lm	ll	ll	ll	ll	ll	ll	ll	lm	lm	ll	lm	lm
Marker16231	<lmxll>	lm	ll	ll	lm	lm	ll	ll	lm	ll	lm	lm	ll	ll	ll	lm	ll	lm	ll	ll	ll	lm	ll	lm	ll	lm	lm	ll	ll	lm	ll	lm	ll	ll	lm	ll	lm	ll	ll	ll	ll	ll	ll	ll	ll	lm	ll	lm	lm
Marker26138	<lmxll>	ll	lm	lm	ll	ll	lm	lm	ll	ll	ll	ll	lm	lm	lm	ll	lm	ll	lm	lm	lm	ll	lm	ll	lm	ll	ll	lm	lm	ll	lm	ll	lm	lm	ll	lm	ll	lm	lm	lm	lm	lm	lm	lm	ll	ll	lm	ll	ll
Marker26137	<lmxll>	ll	lm	lm	ll	ll	lm	lm	ll	ll	ll	ll	lm	lm	lm	ll	lm	ll	lm	lm	lm	ll	lm	ll	lm	ll	ll	lm	lm	ll	lm	ll	lm	lm	ll	lm	ll	lm	lm	lm	lm	lm	lm	lm	ll	ll	lm	ll	ll
Marker37713	<lmxll>	ll	lm	lm	ll	ll	lm	lm	ll	ll	ll	ll	lm	lm	lm	ll	lm	ll	lm	lm	lm	ll	lm	ll	lm	ll	ll	lm	lm	ll	lm	ll	lm	lm	ll	lm	ll	lm	lm	lm	lm	lm	lm	lm	ll	ll	lm	ll	ll
Marker2748	<lmxll>	ll	lm	lm	ll	ll	lm	lm	ll	lm	ll	ll	lm	lm	lm	ll	lm	ll	lm	lm	lm	ll	lm	ll	lm	ll	ll	lm	lm	ll	lm	ll	lm	lm	ll	lm	ll	lm	lm	lm	lm	lm	lm	lm	ll	lm	lm	ll	ll
Marker29667	<lmxll>	lm	ll	ll	lm	lm	ll	ll	lm	ll	lm	lm	ll	ll	ll	lm	ll	lm	ll	ll	ll	lm	ll	lm	ll	lm	lm	ll	ll	lm	ll	lm	ll	ll	lm	ll	lm	ll	ll	ll	ll	ll	ll	ll	lm	ll	ll	lm	lm
Marker39709	<lmxll>	lm	ll	ll	lm	lm	ll	ll	lm	ll	lm	lm	ll	ll	ll	lm	ll	lm	ll	ll	ll	lm	ll	lm	ll	lm	lm	ll	ll	lm	ll	lm	ll	ll	lm	ll	lm	ll	ll	ll	ll	ll	ll	ll	lm	lm	ll	lm	lm
Marker27923	<lmxll>	ll	lm	lm	ll	ll	lm	lm	ll	lm	ll	ll	lm	lm	lm	ll	lm	ll	lm	lm	lm	ll	lm	ll	lm	ll	ll	lm	lm	ll	lm	ll	lm	lm	ll	lm	ll	lm	lm	lm	lm	lm	lm	lm	ll	ll	lm	ll	ll
Marker40632	<efxeg>	ee	ef	ef	ee	eg	fg	fg	ee	ef	ee	eg	fg	fg	fg	ee	--	--	fg	fg	fg	ee	ef	ee	--	--	ee	fg	--	ee	ef	--	--	fg	--	--	ee	fg	--	--	--	--	--	ef	eg	--	--	ee	ee
Marker25226	<lmxll>	ll	lm	lm	ll	ll	lm	lm	ll	lm	ll	ll	lm	lm	lm	ll	lm	ll	lm	lm	lm	ll	lm	ll	lm	ll	ll	lm	lm	ll	lm	ll	lm	lm	ll	lm	ll	lm	lm	lm	lm	lm	lm	lm	ll	ll	lm	ll	ll
Marker12405	<lmxll>	lm	ll	ll	lm	lm	ll	ll	lm	ll	lm	lm	ll	ll	ll	lm	ll	lm	ll	ll	ll	lm	ll	lm	ll	lm	lm	ll	ll	lm	ll	lm	ll	ll	lm	ll	lm	ll	ll	ll	ll	ll	ll	ll	lm	lm	ll	lm	lm
Marker28060	<lmxll>	lm	ll	ll	lm	lm	ll	ll	lm	ll	lm	lm	ll	ll	ll	lm	ll	lm	ll	ll	ll	lm	ll	lm	ll	lm	lm	ll	ll	lm	ll	lm	ll	ll	lm	ll	lm	ll	ll	ll	ll	ll	ll	ll	lm	ll	ll	lm	lm
Marker40613	<lmxll>	lm	ll	ll	lm	lm	ll	ll	lm	ll	lm	lm	ll	ll	ll	lm	ll	lm	ll	ll	ll	lm	ll	lm	ll	lm	lm	ll	ll	lm	ll	lm	ll	ll	lm	ll	lm	ll	ll	ll	ll	ll	ll	ll	lm	ll	ll	lm	lm
Marker32747	<nnxnp>	nn	nn	nn	nn	np	np	np	nn	nn	nn	np	np	np	np	nn	nn	np	np	np	np	nn	nn	nn	nn	nn	nn	np	np	nn	nn	np	nn	np	np	np	np	np	nn	np	np	np	np	nn	np	np	np	nn	nn
Marker1452	<abxcd>	--	--	--	--	bd	ad	ad	bc	--	--	bd	ad	ad	ad	--	--	bd	ad	ad	ad	bc	ac	bc	ac	--	--	ad	ad	bc	ac	--	ac	ad	bd	ad	bd	ad	--	--	ad	--	ad	--	bd	--	ad	--	--
Marker33172	<lmxll>	lm	ll	ll	lm	lm	ll	ll	lm	lm	lm	lm	ll	ll	ll	lm	ll	lm	ll	ll	ll	lm	ll	lm	ll	lm	lm	ll	ll	lm	ll	lm	ll	ll	lm	ll	lm	ll	ll	ll	ll	ll	ll	ll	lm	lm	ll	lm	lm
Marker16559	<lmxll>	ll	lm	lm	ll	ll	lm	lm	ll	lm	ll	ll	lm	lm	lm	ll	lm	ll	lm	lm	lm	ll	lm	ll	lm	ll	ll	lm	lm	ll	lm	ll	lm	lm	ll	lm	ll	lm	lm	lm	lm	lm	lm	lm	ll	lm	lm	ll	ll
Marker8580	<lmxll>	lm	ll	ll	lm	lm	ll	ll	lm	ll	lm	lm	ll	ll	ll	lm	ll	lm	ll	ll	ll	lm	ll	lm	ll	lm	lm	ll	ll	lm	ll	lm	ll	ll	lm	ll	lm	ll	ll	ll	ll	ll	ll	ll	ll	lm	ll	lm	lm
Marker10276	<abxcd>	bd	ad	--	bd	--	--	--	bd	--	bd	--	--	--	--	bd	--	--	--	--	--	bd	ad	bd	ad	--	bd	--	--	bd	--	--	--	--	--	--	--	--	--	--	--	--	--	ad	bd	bd	--	bd	bd
Marker40955	<efxeg>	ee	ef	ef	--	eg	fg	--	--	ef	ee	eg	--	--	--	ee	ef	eg	--	--	--	ee	fg	ee	--	ee	ee	--	fg	ee	ef	--	ef	--	eg	fg	eg	--	ef	fg	fg	fg	fg	ef	eg	--	fg	ee	ee
Marker44181	<lmxll>	ll	lm	lm	ll	ll	lm	lm	ll	ll	ll	ll	lm	lm	lm	ll	lm	lm	lm	lm	lm	ll	lm	ll	lm	ll	ll	lm	lm	ll	lm	ll	lm	lm	ll	lm	lm	lm	lm	lm	lm	lm	lm	lm	ll	lm	lm	ll	ll
Marker62817	<nnxnp>	np	np	np	np	nn	nn	nn	np	np	np	nn	nn	nn	nn	np	np	nn	nn	nn	nn	np	nn	np	nn	np	np	nn	nn	np	np	nn	np	nn	nn	nn	nn	nn	np	nn	nn	nn	nn	np	nn	nn	nn	np	np
Marker27301	<lmxll>	ll	lm	lm	ll	ll	lm	lm	ll	ll	ll	ll	lm	lm	lm	ll	lm	lm	lm	lm	ll	ll	lm	ll	lm	ll	ll	lm	lm	ll	lm	ll	lm	lm	ll	lm	lm	lm	lm	lm	lm	lm	lm	lm	ll	ll	lm	ll	ll
Marker38301	<lmxll>	lm	ll	ll	lm	lm	ll	ll	lm	lm	lm	lm	ll	ll	ll	lm	ll	ll	ll	ll	lm	lm	ll	lm	ll	lm	lm	ll	ll	lm	ll	lm	lm	ll	lm	ll	ll	ll	ll	ll	ll	ll	ll	ll	lm	lm	ll	lm	ll
Marker11928	<lmxll>	lm	ll	ll	lm	lm	ll	ll	lm	lm	lm	lm	ll	ll	ll	lm	ll	ll	ll	ll	lm	lm	ll	lm	ll	lm	lm	ll	ll	lm	ll	lm	lm	ll	lm	ll	ll	ll	ll	ll	ll	ll	ll	ll	lm	lm	ll	lm	ll
Marker42973	<lmxll>	ll	lm	lm	ll	ll	lm	lm	ll	lm	ll	ll	lm	lm	lm	ll	lm	lm	lm	lm	ll	ll	lm	ll	lm	ll	ll	lm	lm	ll	lm	ll	ll	lm	ll	lm	lm	lm	lm	lm	lm	lm	lm	lm	ll	ll	lm	ll	ll
Marker36747	<lmxll>	ll	lm	lm	lm	ll	lm	lm	ll	lm	ll	ll	lm	lm	lm	ll	lm	lm	lm	lm	ll	ll	lm	ll	lm	ll	ll	lm	lm	ll	lm	ll	ll	lm	ll	lm	lm	lm	lm	lm	lm	lm	lm	lm	ll	ll	lm	ll	ll
Marker11758	<lmxll>	ll	lm	lm	lm	ll	lm	lm	ll	lm	ll	ll	lm	lm	lm	ll	lm	lm	lm	lm	ll	ll	lm	ll	lm	ll	ll	lm	lm	ll	lm	ll	ll	lm	ll	lm	lm	lm	lm	lm	lm	lm	lm	lm	ll	ll	lm	ll	ll
Marker11988	<lmxll>	ll	lm	lm	lm	ll	lm	lm	ll	lm	ll	ll	lm	lm	lm	ll	lm	lm	lm	lm	ll	ll	lm	ll	lm	ll	ll	lm	lm	ll	lm	ll	ll	lm	ll	lm	lm	lm	lm	lm	lm	lm	lm	lm	ll	ll	lm	ll	ll
Marker27930	<nnxnp>	np	np	np	np	nn	nn	nn	nn	np	np	nn	nn	nn	nn	np	np	nn	nn	nn	nn	np	nn	np	nn	np	nn	nn	nn	np	np	nn	np	nn	nn	nn	nn	nn	np	nn	nn	nn	nn	np	nn	nn	nn	np	np
Marker37007	<lmxll>	lm	ll	ll	lm	lm	ll	ll	lm	ll	lm	lm	ll	ll	ll	lm	ll	ll	ll	ll	lm	lm	ll	lm	ll	lm	lm	ll	ll	lm	ll	lm	lm	ll	lm	ll	ll	ll	ll	ll	ll	ll	ll	ll	lm	lm	ll	lm	lm
Marker36748	<efxeg>	ef	ee	ee	ef	fg	eg	eg	--	ef	ef	fg	eg	eg	eg	ef	ee	eg	eg	eg	fg	ef	eg	ef	--	ef	fg	eg	ee	ef	ee	--	ef	--	--	ee	eg	eg	ee	ee	ee	ee	--	eg	--	--	--	ef	--
Marker11996	<abxcd>	bd	ac	ad	bd	bc	--	--	--	--	bd	bc	ac	--	ac	bd	--	ad	ac	--	bc	bd	--	bd	--	bd	bc	ac	ad	bd	ad	ad	bd	ac	--	ad	--	ac	--	--	ac	--	ac	ac	bc	bd	ad	bd	ad
Marker27709	<lmxll>	ll	lm	lm	ll	ll	lm	lm	ll	lm	ll	ll	lm	lm	lm	ll	lm	lm	lm	lm	ll	ll	lm	ll	lm	ll	ll	lm	lm	ll	lm	ll	ll	lm	ll	lm	lm	lm	lm	lm	lm	ll	lm	lm	ll	ll	lm	ll	ll
Marker43902	<lmxll>	lm	ll	ll	lm	lm	ll	ll	lm	ll	lm	lm	ll	ll	ll	lm	ll	ll	ll	ll	lm	lm	ll	lm	ll	lm	lm	ll	ll	lm	ll	lm	lm	ll	lm	ll	ll	ll	ll	ll	ll	lm	ll	ll	lm	lm	ll	lm	lm
Marker23745	<lmxll>	ll	lm	lm	lm	ll	lm	lm	ll	lm	ll	ll	lm	lm	lm	ll	lm	lm	lm	lm	ll	ll	lm	ll	lm	ll	ll	lm	lm	ll	lm	ll	ll	lm	ll	lm	lm	lm	lm	lm	lm	ll	lm	lm	ll	ll	lm	ll	ll
Marker10780	<lmxll>	ll	lm	lm	ll	ll	lm	lm	ll	lm	ll	ll	lm	lm	lm	ll	lm	lm	lm	lm	ll	ll	lm	ll	lm	ll	ll	lm	lm	ll	lm	ll	ll	lm	ll	lm	lm	lm	lm	lm	lm	ll	lm	lm	ll	lm	lm	ll	lm
Marker11756	<nnxnp>	nn	nn	nn	nn	np	np	np	np	nn	nn	np	np	np	np	nn	np	np	np	np	np	np	np	nn	nn	nn	np	np	nn	nn	nn	np	nn	np	np	np	np	np	nn	np	np	nn	np	np	np	np	np	nn	nn
Marker9853	<lmxll>	lm	ll	ll	lm	lm	ll	ll	lm	ll	lm	lm	ll	ll	ll	lm	ll	ll	ll	ll	lm	lm	ll	lm	ll	lm	lm	ll	ll	lm	ll	lm	lm	ll	lm	ll	ll	ll	ll	ll	ll	lm	ll	ll	lm	ll	ll	lm	ll
Marker22731	<lmxll>	ll	lm	lm	ll	ll	lm	lm	ll	lm	ll	ll	lm	lm	lm	ll	lm	lm	lm	lm	ll	ll	lm	ll	lm	ll	ll	lm	lm	ll	lm	ll	ll	lm	ll	lm	lm	lm	lm	lm	lm	ll	lm	lm	ll	ll	lm	ll	lm
Marker36983	<nnxnp>	nn	nn	nn	nn	np	np	np	np	nn	nn	np	np	np	np	nn	np	np	np	np	np	nn	np	nn	nn	nn	np	np	nn	nn	nn	np	nn	np	np	np	np	np	nn	np	np	np	np	np	np	np	np	nn	nn
Marker22718	<nnxnp>	np	np	np	np	nn	nn	nn	nn	np	np	nn	nn	nn	nn	np	nn	nn	nn	nn	nn	np	nn	np	np	np	nn	nn	np	np	np	nn	np	nn	nn	nn	nn	nn	np	nn	nn	nn	nn	nn	nn	nn	nn	np	np
Marker21304	<lmxll>	ll	lm	lm	ll	ll	lm	lm	ll	ll	ll	ll	lm	lm	lm	ll	lm	lm	lm	lm	ll	ll	lm	ll	lm	ll	ll	lm	lm	ll	lm	ll	ll	ll	ll	lm	lm	lm	lm	lm	lm	ll	lm	lm	ll	ll	lm	ll	lm
Marker44185	<nnxnp>	np	np	np	np	nn	nn	nn	nn	np	np	nn	nn	nn	nn	np	np	nn	nn	nn	nn	np	nn	np	nn	np	nn	nn	nn	np	np	nn	np	nn	nn	nn	nn	nn	np	nn	nn	nn	nn	nn	nn	nn	nn	np	np
Marker57406	<nnxnp>	nn	nn	nn	nn	np	np	np	np	nn	nn	np	np	np	np	nn	np	np	np	np	np	nn	np	nn	nn	nn	np	np	nn	nn	nn	np	nn	np	np	np	np	np	nn	np	np	np	np	np	np	np	np	nn	nn
Marker55177	<nnxnp>	nn	nn	nn	nn	np	np	np	np	nn	nn	np	np	np	np	nn	nn	np	np	np	np	nn	np	nn	np	nn	np	np	np	nn	nn	nn	nn	np	np	np	np	np	nn	np	np	np	nn	np	np	np	np	nn	nn
Marker10783	<lmxll>	lm	ll	ll	lm	lm	ll	ll	lm	ll	lm	lm	ll	ll	ll	lm	ll	ll	ll	ll	lm	lm	ll	lm	ll	lm	lm	ll	ll	lm	ll	lm	lm	ll	ll	ll	ll	ll	ll	ll	ll	ll	ll	ll	lm	lm	ll	lm	ll
Marker30290	<nnxnp>	np	np	np	np	nn	nn	nn	nn	np	np	nn	nn	nn	nn	np	np	nn	nn	nn	nn	np	nn	np	nn	np	nn	nn	nn	np	np	np	np	nn	np	nn	nn	nn	np	nn	nn	nn	np	nn	nn	nn	nn	np	np
Marker18274	<nnxnp>	nn	nn	nn	nn	np	np	np	np	nn	nn	np	np	np	np	nn	nn	np	np	np	np	nn	np	nn	np	nn	np	np	nn	nn	nn	nn	nn	np	nn	nn	np	np	nn	nn	np	nn	np	np	nn	nn	nn	nn	nn
Marker38022	<lmxll>	ll	ll	ll	lm	lm	ll	ll	lm	lm	lm	lm	ll	ll	ll	lm	ll	ll	ll	ll	lm	lm	ll	lm	ll	lm	lm	ll	ll	lm	ll	lm	ll	ll	ll	ll	ll	ll	ll	ll	ll	ll	ll	ll	lm	lm	ll	lm	ll
Marker19926	<lmxll>	ll	ll	ll	lm	lm	ll	ll	lm	ll	lm	lm	ll	ll	ll	lm	ll	ll	ll	ll	lm	lm	ll	lm	ll	lm	lm	ll	ll	lm	ll	lm	ll	ll	ll	ll	ll	ll	ll	ll	ll	ll	ll	ll	lm	lm	ll	lm	ll
Marker18776	<lmxll>	ll	ll	ll	lm	lm	ll	ll	lm	ll	lm	lm	ll	ll	ll	lm	ll	ll	ll	ll	lm	lm	ll	lm	ll	lm	lm	ll	ll	lm	ll	lm	ll	ll	ll	ll	ll	ll	ll	ll	ll	ll	ll	ll	lm	lm	ll	lm	ll
Marker44323	<lmxll>	ll	ll	ll	lm	lm	ll	ll	lm	lm	lm	lm	ll	ll	ll	lm	ll	ll	ll	ll	lm	lm	ll	lm	ll	lm	lm	ll	ll	lm	ll	lm	ll	ll	ll	ll	ll	ll	ll	ll	ll	ll	ll	ll	lm	lm	ll	lm	ll
Marker28211	<nnxnp>	np	np	np	np	nn	nn	nn	nn	np	np	nn	nn	nn	nn	np	np	nn	nn	nn	nn	np	nn	np	nn	np	nn	nn	nn	np	np	np	np	nn	np	np	nn	nn	np	np	nn	np	nn	nn	np	np	np	np	np
Marker25939	<nnxnp>	nn	nn	nn	nn	np	np	np	np	nn	nn	np	np	np	np	nn	nn	np	np	np	np	nn	nn	nn	np	nn	np	np	np	nn	nn	nn	nn	np	nn	np	np	np	nn	nn	np	nn	nn	np	nn	np	nn	nn	nn
Marker23405	<lmxll>	ll	lm	lm	ll	ll	lm	lm	ll	lm	ll	ll	lm	lm	lm	ll	lm	lm	lm	lm	ll	ll	lm	ll	lm	ll	ll	lm	lm	ll	lm	ll	lm	lm	lm	lm	lm	lm	lm	lm	lm	lm	lm	lm	ll	ll	lm	ll	lm
Marker19262	<lmxll>	ll	ll	ll	lm	lm	ll	ll	lm	ll	lm	lm	ll	ll	ll	lm	ll	ll	ll	ll	lm	lm	ll	lm	ll	lm	lm	ll	ll	lm	ll	lm	ll	ll	ll	ll	ll	ll	ll	ll	ll	ll	ll	ll	lm	lm	ll	lm	ll
Marker244	<lmxll>	ll	ll	ll	lm	lm	ll	ll	lm	ll	lm	lm	ll	ll	ll	lm	ll	ll	ll	ll	lm	lm	ll	lm	ll	lm	lm	ll	ll	lm	ll	lm	ll	ll	ll	ll	ll	ll	ll	ll	ll	ll	ll	ll	lm	lm	ll	lm	ll
Marker19991	<nnxnp>	nn	nn	nn	nn	np	np	np	np	nn	nn	np	np	np	np	nn	nn	np	np	np	np	nn	nn	nn	np	nn	np	np	np	nn	nn	nn	nn	np	nn	np	np	np	nn	nn	np	nn	nn	np	nn	np	nn	nn	nn
Marker38548	<lmxll>	lm	ll	ll	lm	lm	ll	ll	lm	lm	lm	lm	ll	ll	ll	lm	ll	ll	ll	ll	lm	ll	ll	lm	ll	lm	lm	ll	ll	lm	ll	lm	lm	lm	lm	ll	ll	ll	ll	ll	ll	lm	ll	ll	lm	ll	ll	lm	ll
Marker29321	<lmxll>	lm	ll	ll	lm	lm	ll	ll	lm	lm	lm	lm	ll	ll	ll	lm	ll	ll	ll	ll	lm	lm	ll	lm	ll	lm	lm	ll	ll	lm	ll	lm	lm	lm	lm	ll	ll	ll	ll	ll	ll	lm	ll	ll	lm	ll	ll	lm	ll
Marker23774	<lmxll>	ll	lm	lm	ll	ll	lm	lm	ll	lm	ll	ll	lm	lm	lm	ll	lm	lm	lm	lm	ll	lm	lm	ll	lm	ll	ll	lm	lm	ll	lm	ll	ll	ll	ll	lm	lm	lm	lm	lm	lm	ll	lm	lm	ll	lm	lm	ll	lm
Marker34358	<lmxll>	lm	ll	ll	lm	lm	ll	ll	lm	ll	lm	lm	ll	ll	ll	lm	ll	ll	ll	ll	lm	ll	ll	lm	ll	lm	lm	ll	ll	lm	ll	lm	lm	lm	lm	ll	ll	ll	ll	ll	ll	lm	ll	ll	lm	ll	ll	lm	ll
Marker36878	<lmxll>	ll	lm	lm	ll	ll	lm	lm	ll	lm	ll	ll	lm	lm	lm	ll	lm	lm	lm	lm	ll	lm	lm	ll	lm	ll	ll	lm	lm	ll	lm	ll	ll	ll	lm	lm	lm	lm	lm	lm	lm	ll	lm	lm	ll	lm	lm	lm	lm
Marker37169	<lmxll>	lm	lm	lm	ll	ll	lm	lm	lm	lm	ll	ll	lm	lm	lm	ll	lm	lm	lm	lm	ll	lm	lm	ll	lm	ll	ll	lm	lm	ll	lm	ll	ll	ll	lm	lm	lm	lm	lm	lm	lm	ll	lm	lm	ll	lm	lm	lm	lm
Marker18706	<lmxll>	lm	lm	lm	ll	ll	lm	lm	lm	lm	ll	ll	lm	lm	lm	ll	lm	lm	lm	lm	ll	lm	lm	ll	lm	ll	ll	lm	lm	ll	lm	ll	ll	ll	lm	lm	lm	lm	lm	lm	lm	ll	lm	lm	ll	lm	lm	lm	lm
Marker24364	<lmxll>	ll	ll	ll	lm	lm	ll	ll	ll	ll	lm	lm	ll	ll	ll	lm	ll	ll	ll	ll	lm	ll	ll	lm	ll	lm	lm	ll	ll	lm	ll	lm	lm	lm	ll	ll	ll	ll	ll	ll	ll	lm	ll	ll	lm	ll	ll	ll	ll
Marker36081	<nnxnp>	np	np	nn	np	np	np	np	np	nn	nn	np	np	np	np	nn	np	np	np	np	np	np	np	nn	np	nn	np	np	nn	nn	nn	np	nn	np	nn	np	np	np	nn	nn	np	nn	np	np	np	np	np	nn	nn
Marker3682	<lmxll>	lm	lm	lm	ll	ll	lm	lm	lm	lm	ll	ll	lm	lm	lm	ll	lm	lm	lm	lm	ll	lm	lm	ll	lm	ll	ll	lm	lm	ll	lm	ll	ll	ll	lm	lm	lm	lm	lm	lm	lm	ll	lm	lm	ll	lm	lm	lm	lm
Marker37157	<lmxll>	lm	lm	lm	ll	ll	lm	lm	lm	lm	ll	ll	lm	lm	lm	ll	lm	lm	lm	lm	ll	lm	lm	ll	lm	ll	ll	lm	lm	ll	lm	ll	ll	ll	lm	lm	lm	lm	lm	lm	lm	lm	lm	ll	ll	lm	lm	lm	lm
Marker19697	<lmxll>	ll	ll	ll	lm	lm	ll	ll	ll	ll	lm	lm	ll	ll	ll	lm	ll	ll	ll	ll	lm	ll	ll	lm	ll	lm	lm	ll	ll	lm	ll	lm	lm	lm	ll	ll	ll	ll	ll	ll	ll	ll	ll	lm	lm	ll	ll	ll	ll
Marker28828	<lmxll>	ll	ll	ll	lm	lm	ll	ll	ll	ll	lm	lm	ll	ll	ll	lm	ll	ll	ll	ll	lm	ll	ll	lm	ll	lm	lm	ll	ll	lm	ll	lm	lm	lm	ll	ll	ll	ll	ll	ll	ll	ll	ll	ll	lm	ll	ll	ll	ll
Marker12828	<lmxll>	lm	lm	lm	ll	ll	lm	lm	lm	lm	ll	ll	lm	lm	lm	ll	lm	lm	lm	lm	ll	lm	lm	ll	lm	ll	ll	lm	lm	ll	lm	ll	ll	ll	lm	lm	lm	lm	lm	lm	lm	lm	lm	ll	ll	lm	lm	lm	lm
Marker29505	<nnxnp>	nn	nn	np	nn	nn	nn	nn	nn	np	np	nn	nn	nn	nn	np	nn	nn	nn	nn	nn	np	nn	np	nn	np	nn	nn	np	np	np	nn	np	nn	np	nn	nn	nn	np	np	nn	np	nn	nn	nn	nn	nn	np	nn
Marker48637	<nnxnp>	nn	nn	np	nn	nn	nn	nn	nn	np	np	nn	nn	nn	nn	np	nn	nn	nn	nn	nn	np	nn	np	nn	np	nn	nn	np	np	np	nn	np	nn	np	nn	nn	nn	np	np	nn	np	nn	nn	nn	nn	nn	np	nn
Marker37343	<nnxnp>	nn	nn	np	nn	nn	nn	nn	nn	np	np	nn	nn	nn	nn	np	nn	nn	nn	nn	nn	np	nn	np	nn	np	nn	nn	np	np	np	nn	np	nn	np	nn	nn	nn	np	np	nn	np	nn	nn	nn	nn	nn	np	nn
Marker25959	<lmxll>	ll	ll	ll	lm	lm	ll	ll	ll	ll	lm	lm	ll	ll	ll	lm	ll	ll	ll	ll	lm	ll	ll	lm	ll	lm	lm	ll	ll	lm	ll	lm	lm	lm	ll	ll	ll	ll	ll	ll	ll	ll	ll	lm	lm	ll	ll	ll	ll
Marker21815	<nnxnp>	np	np	nn	np	np	np	np	np	nn	nn	np	np	np	np	nn	np	np	np	np	np	nn	np	nn	np	nn	np	np	nn	nn	nn	np	nn	np	nn	np	np	np	nn	nn	np	np	np	np	np	np	np	nn	np
Marker53000	<nnxnp>	np	np	nn	np	np	np	np	np	nn	nn	np	np	np	np	nn	np	np	np	np	np	nn	np	nn	np	nn	np	np	nn	nn	nn	np	nn	np	nn	np	np	np	nn	nn	np	np	np	np	np	np	np	nn	np
Marker24565	<nnxnp>	nn	nn	np	nn	nn	nn	nn	nn	np	np	nn	nn	nn	nn	np	nn	nn	nn	nn	nn	np	nn	np	nn	np	nn	nn	np	np	np	nn	np	nn	np	nn	nn	nn	np	nn	nn	nn	nn	nn	nn	nn	nn	np	nn
Marker11127	<nnxnp>	nn	nn	np	nn	nn	nn	nn	nn	np	np	nn	nn	nn	nn	np	nn	nn	nn	nn	nn	np	nn	np	nn	np	nn	nn	np	np	np	nn	np	nn	np	nn	nn	nn	np	nn	nn	nn	nn	nn	nn	nn	nn	np	nn
Marker43137	<nnxnp>	np	np	nn	np	np	np	np	np	np	nn	np	np	np	np	nn	np	np	np	np	np	nn	np	nn	np	nn	np	np	nn	nn	nn	np	nn	np	nn	np	np	np	nn	np	np	np	np	np	np	np	np	nn	np
Marker4296	<nnxnp>	np	np	nn	np	np	np	np	np	np	nn	np	np	np	np	nn	np	np	np	np	np	nn	np	nn	np	nn	np	np	nn	nn	nn	np	nn	np	nn	np	np	np	nn	np	np	np	np	np	np	np	np	nn	np
Marker54444	<nnxnp>	np	np	nn	np	np	np	np	np	np	nn	np	np	np	np	nn	np	np	np	np	np	nn	np	nn	np	nn	np	np	nn	nn	nn	np	nn	np	nn	np	np	np	nn	np	np	np	np	np	np	np	np	nn	np
Marker56892	<nnxnp>	np	np	nn	np	np	np	np	np	np	nn	np	np	np	np	nn	np	np	np	np	np	nn	np	nn	np	nn	np	np	nn	nn	nn	np	nn	np	nn	np	np	np	nn	np	np	np	np	np	np	np	np	nn	np
Marker34360	<nnxnp>	np	np	nn	np	np	np	np	np	np	nn	np	np	np	np	nn	np	np	np	np	np	nn	np	nn	np	nn	np	np	nn	nn	nn	np	nn	np	nn	np	np	np	nn	np	np	np	np	np	np	np	np	nn	np
Marker20078	<nnxnp>	nn	nn	np	nn	nn	nn	nn	nn	nn	np	nn	nn	nn	nn	np	nn	nn	nn	nn	nn	np	nn	np	nn	np	nn	nn	np	np	np	nn	np	nn	np	nn	nn	nn	np	nn	nn	nn	nn	nn	nn	nn	nn	np	nn
Marker21496	<nnxnp>	np	np	nn	np	np	np	np	np	np	nn	np	np	np	np	nn	np	np	np	np	np	nn	np	nn	np	nn	np	np	nn	nn	nn	np	nn	np	nn	np	np	np	nn	np	np	np	np	np	np	np	np	nn	np
Marker16429	<nnxnp>	nn	nn	np	nn	nn	nn	nn	nn	np	np	np	nn	nn	nn	np	nn	nn	nn	nn	nn	np	nn	np	nn	np	nn	np	np	np	np	nn	np	nn	np	nn	nn	nn	np	nn	nn	nn	nn	nn	nn	nn	nn	np	nn
Marker8423	<efxeg>	--	ee	--	ef	ee	--	--	--	ee	ef	ef	ee	ee	ee	ef	--	ee	--	ee	--	ee	ee	ee	--	ef	--	ee	--	--	ee	--	--	ef	--	--	ee	ee	--	--	ee	--	--	ee	--	ee	--	ee	--
Marker34973	<efxeg>	--	ee	ee	ef	ef	--	--	--	ee	ee	ee	ee	ee	ee	--	--	ee	ee	--	ef	ee	ee	ef	--	ef	ee	ee	--	--	ee	--	--	ef	--	--	ee	ee	--	--	ee	--	--	ee	--	ee	--	ee	--
Marker34975	<efxeg>	--	ee	ee	ee	ee	--	--	--	ee	ef	ef	ee	ee	--	--	--	ee	--	ee	ef	ee	ee	ef	--	ef	ee	ee	--	--	ee	--	--	ef	--	--	ee	ee	--	--	ee	--	--	ee	--	ee	--	ee	--
Marker44493	<nnxnp>	nn	nn	np	nn	nn	nn	nn	nn	np	np	nn	nn	nn	nn	np	nn	nn	nn	nn	nn	np	nn	np	nn	np	nn	nn	np	nn	nn	nn	np	nn	np	nn	nn	nn	nn	np	nn	nn	nn	nn	nn	nn	nn	nn	nn
Marker7956	<nnxnp>	nn	nn	np	nn	nn	nn	nn	nn	np	nn	nn	nn	nn	nn	np	nn	nn	nn	nn	nn	np	nn	nn	nn	np	nn	nn	np	nn	nn	nn	nn	nn	np	nn	nn	nn	nn	np	nn	nn	nn	nn	nn	nn	nn	nn	nn
Marker38453	<nnxnp>	nn	nn	np	nn	nn	nn	nn	nn	np	np	np	nn	nn	np	np	nn	nn	np	nn	nn	np	nn	np	nn	np	nn	np	np	nn	np	nn	np	nn	np	nn	nn	nn	np	np	nn	nn	nn	nn	nn	nn	nn	np	nn
Marker57048	<nnxnp>	nn	nn	np	nn	nn	nn	nn	nn	np	np	np	nn	nn	np	np	nn	nn	nn	nn	nn	np	nn	np	nn	np	nn	nn	np	nn	np	nn	np	nn	np	nn	nn	nn	np	np	nn	nn	nn	nn	nn	nn	nn	nn	nn
Marker8425	<efxeg>	--	ee	--	ee	ee	--	--	--	ee	ee	ef	ee	ee	--	ee	--	--	--	ee	--	ee	ee	ef	--	ef	--	ee	--	--	ee	--	--	ef	--	--	ee	ee	--	--	ee	--	--	ee	--	ee	--	ee	--
Marker27434	<efxeg>	ef	ee	eg	ee	ef	ee	ee	--	eg	eg	eg	ee	ee	eg	eg	--	--	eg	ef	ee	eg	ee	eg	--	eg	ee	ee	eg	ef	eg	ee	eg	ef	ee	--	--	ef	eg	ee	ee	ee	ee	ee	ef	ee	--	ee	--
Marker11659	<abxcd>	--	--	--	ac	--	--	--	--	--	ad	--	--	--	--	--	--	ac	--	bc	--	bd	ac	bd	--	bd	--	ac	--	--	--	--	ad	bc	--	--	--	--	--	--	--	--	--	--	--	--	--	--	ac
Marker23126	<lmxll>	ll	ll	ll	ll	lm	ll	ll	lm	lm	ll	lm	ll	lm	ll	ll	ll	ll	ll	lm	lm	ll	ll	lm	ll	lm	ll	ll	ll	lm	lm	ll	lm	lm	ll	ll	ll	lm	ll	ll	ll	lm	ll	ll	lm	ll	ll	ll	ll
Marker32139	<lmxll>	lm	lm	lm	lm	ll	lm	lm	lm	ll	lm	ll	lm	ll	lm	lm	lm	lm	lm	ll	ll	lm	lm	ll	lm	ll	ll	lm	lm	ll	ll	lm	ll	ll	lm	lm	lm	ll	lm	lm	lm	ll	lm	lm	ll	lm	lm	lm	lm
Marker32132	<lmxll>	lm	lm	lm	lm	ll	lm	lm	lm	ll	lm	ll	lm	ll	lm	lm	lm	lm	lm	ll	ll	lm	lm	ll	lm	ll	ll	lm	lm	ll	ll	lm	ll	ll	lm	lm	lm	ll	lm	lm	lm	ll	lm	lm	ll	lm	lm	lm	lm
Marker23127	<lmxll>	lm	lm	lm	lm	ll	lm	lm	lm	ll	lm	ll	lm	ll	lm	lm	lm	lm	lm	ll	ll	lm	lm	ll	lm	ll	ll	lm	lm	ll	ll	lm	ll	ll	lm	lm	lm	ll	lm	lm	lm	ll	lm	lm	ll	lm	lm	lm	lm
Marker31461	<lmxll>	ll	ll	ll	ll	lm	ll	ll	lm	lm	ll	lm	ll	lm	ll	ll	ll	ll	ll	lm	lm	ll	ll	lm	ll	lm	ll	ll	ll	lm	lm	ll	lm	lm	ll	ll	ll	lm	ll	ll	ll	lm	ll	ll	lm	ll	ll	ll	ll
Marker35320	<lmxll>	lm	lm	lm	lm	ll	lm	lm	ll	ll	lm	ll	lm	ll	lm	lm	lm	lm	lm	ll	ll	lm	lm	ll	lm	ll	lm	lm	lm	ll	ll	lm	ll	ll	lm	lm	lm	ll	lm	lm	lm	ll	lm	lm	ll	lm	lm	lm	lm
Marker18616	<lmxll>	lm	lm	lm	lm	ll	lm	lm	lm	ll	lm	ll	lm	ll	lm	lm	lm	lm	lm	ll	ll	lm	lm	ll	lm	ll	lm	lm	lm	ll	ll	lm	ll	ll	lm	lm	lm	ll	lm	lm	lm	ll	lm	lm	ll	lm	lm	lm	lm
Marker36094	<lmxll>	ll	ll	ll	ll	lm	ll	ll	ll	lm	ll	lm	ll	lm	ll	ll	ll	ll	ll	lm	lm	ll	ll	lm	ll	lm	ll	ll	ll	lm	lm	ll	lm	lm	ll	ll	ll	lm	ll	ll	ll	lm	ll	ll	lm	ll	ll	ll	ll
Marker27249	<lmxll>	ll	ll	ll	ll	lm	ll	ll	ll	lm	ll	lm	ll	lm	ll	ll	ll	ll	ll	lm	lm	ll	ll	lm	ll	lm	ll	ll	ll	lm	lm	ll	lm	lm	ll	ll	ll	lm	ll	ll	ll	lm	ll	ll	lm	ll	ll	ll	ll
Marker1135	<efxeg>	eg	--	ee	ee	--	--	eg	fg	ef	ee	--	--	--	ee	ee	ee	eg	--	--	ef	ee	--	fg	ee	ef	ee	--	ee	ef	ee	--	ef	ef	ee	eg	eg	--	ee	ee	ef	ef	ee	--	ef	eg	ee	--	ee
Marker17242	<lmxll>	ll	ll	ll	ll	lm	ll	ll	ll	lm	ll	lm	ll	lm	ll	ll	ll	ll	ll	lm	lm	ll	ll	lm	ll	lm	ll	ll	ll	lm	lm	ll	lm	lm	ll	ll	ll	lm	ll	ll	ll	lm	ll	ll	lm	ll	ll	ll	ll
Marker38456	<lmxll>	ll	ll	ll	ll	lm	ll	ll	ll	lm	ll	lm	ll	lm	ll	ll	ll	ll	ll	lm	lm	ll	ll	lm	ll	lm	ll	ll	ll	ll	lm	ll	lm	lm	ll	ll	ll	lm	ll	ll	ll	lm	ll	ll	lm	ll	ll	ll	ll
Marker35695	<lmxll>	lm	lm	lm	lm	ll	lm	lm	ll	ll	lm	ll	lm	ll	lm	lm	lm	lm	lm	ll	ll	lm	lm	ll	lm	ll	lm	lm	lm	ll	ll	lm	ll	ll	lm	lm	lm	ll	lm	lm	lm	ll	lm	lm	ll	lm	lm	lm	lm
Marker35709	<lmxll>	ll	ll	ll	ll	lm	ll	ll	lm	lm	ll	lm	ll	lm	ll	ll	ll	ll	ll	lm	lm	ll	ll	lm	ll	lm	ll	ll	ll	lm	lm	ll	lm	lm	ll	ll	lm	lm	ll	ll	ll	lm	ll	ll	lm	ll	ll	ll	ll
Marker35155	<lmxll>	lm	lm	lm	lm	ll	lm	lm	ll	ll	lm	ll	lm	ll	lm	lm	lm	lm	lm	ll	ll	lm	lm	ll	lm	ll	lm	lm	lm	ll	ll	lm	ll	ll	lm	lm	ll	ll	lm	lm	lm	ll	lm	lm	ll	lm	lm	lm	lm
Marker16994	<lmxll>	ll	ll	ll	ll	lm	ll	ll	ll	lm	ll	lm	ll	lm	ll	ll	ll	ll	ll	lm	lm	ll	ll	lm	ll	lm	ll	ll	ll	ll	lm	ll	lm	lm	ll	ll	ll	lm	ll	ll	ll	lm	ll	ll	lm	ll	ll	ll	ll
Marker14634	<lmxll>	ll	ll	ll	ll	lm	ll	ll	ll	lm	ll	lm	ll	lm	ll	ll	ll	ll	ll	lm	lm	ll	ll	lm	ll	lm	ll	ll	ll	ll	lm	ll	lm	lm	ll	ll	ll	lm	ll	ll	ll	lm	ll	ll	lm	ll	ll	ll	ll
Marker39281	<lmxll>	ll	ll	ll	ll	lm	ll	ll	lm	lm	ll	lm	ll	lm	ll	ll	ll	ll	ll	lm	lm	ll	ll	lm	ll	lm	ll	ll	ll	lm	lm	ll	lm	lm	ll	ll	ll	lm	ll	ll	ll	lm	ll	ll	lm	ll	ll	ll	ll
Marker43093	<lmxll>	lm	lm	lm	lm	ll	lm	lm	ll	ll	lm	ll	lm	ll	lm	lm	lm	lm	lm	ll	ll	lm	lm	ll	lm	ll	lm	lm	lm	ll	ll	lm	ll	ll	lm	lm	lm	ll	lm	lm	lm	ll	lm	lm	ll	lm	lm	lm	lm
Marker40984	<lmxll>	lm	lm	lm	lm	ll	lm	lm	ll	ll	lm	ll	lm	ll	lm	lm	lm	lm	lm	ll	ll	lm	lm	ll	lm	ll	lm	lm	lm	ll	ll	lm	ll	ll	lm	lm	ll	ll	lm	lm	lm	ll	lm	lm	ll	lm	lm	lm	lm
Marker33687	<lmxll>	lm	ll	ll	ll	lm	ll	ll	lm	ll	ll	lm	ll	lm	ll	ll	ll	ll	ll	lm	ll	ll	ll	lm	ll	lm	ll	ll	ll	lm	lm	ll	ll	lm	ll	ll	lm	lm	ll	ll	ll	ll	ll	ll	lm	ll	ll	ll	ll
Marker2067	<lmxll>	lm	ll	lm	lm	ll	lm	lm	ll	ll	lm	ll	lm	ll	lm	lm	lm	lm	lm	ll	lm	lm	lm	ll	lm	ll	lm	lm	lm	ll	ll	lm	lm	ll	lm	lm	lm	ll	lm	lm	lm	ll	lm	lm	ll	lm	lm	lm	lm
Marker8595	<lmxll>	lm	ll	lm	lm	ll	lm	lm	ll	lm	lm	ll	lm	ll	lm	lm	lm	lm	lm	ll	lm	lm	lm	ll	lm	ll	lm	lm	lm	ll	ll	lm	lm	ll	lm	lm	lm	ll	lm	lm	lm	ll	lm	lm	ll	lm	lm	lm	lm
Marker34735	<lmxll>	lm	lm	lm	lm	ll	lm	lm	ll	ll	lm	ll	lm	ll	lm	lm	ll	lm	lm	ll	ll	lm	lm	ll	lm	ll	lm	lm	lm	ll	ll	lm	ll	ll	lm	lm	lm	ll	lm	lm	lm	ll	lm	lm	ll	lm	lm	lm	lm
Marker35321	<lmxll>	lm	lm	lm	lm	ll	lm	ll	ll	ll	lm	ll	lm	ll	lm	lm	ll	lm	lm	ll	ll	lm	lm	ll	lm	ll	lm	lm	lm	ll	ll	lm	ll	ll	lm	lm	lm	ll	lm	lm	lm	ll	lm	lm	ll	lm	lm	lm	lm
Marker3057	<lmxll>	lm	lm	lm	lm	ll	lm	ll	ll	ll	lm	ll	lm	ll	lm	lm	ll	lm	lm	ll	ll	lm	lm	ll	lm	ll	lm	lm	lm	ll	ll	lm	ll	ll	lm	lm	lm	ll	lm	lm	lm	ll	lm	lm	ll	lm	lm	lm	lm
Marker37197	<lmxll>	lm	lm	lm	lm	ll	lm	ll	ll	ll	lm	ll	lm	ll	lm	lm	ll	lm	lm	ll	ll	lm	lm	ll	lm	ll	lm	lm	lm	ll	ll	lm	ll	ll	lm	lm	lm	ll	lm	lm	lm	ll	lm	lm	ll	lm	lm	lm	lm
Marker21395	<lmxll>	lm	ll	ll	ll	lm	ll	ll	lm	ll	ll	lm	ll	ll	ll	ll	ll	ll	ll	lm	ll	ll	ll	ll	ll	ll	ll	ll	ll	lm	ll	ll	ll	lm	ll	ll	lm	lm	ll	ll	ll	ll	ll	ll	lm	ll	ll	ll	ll
Marker24984	<lmxll>	ll	lm	lm	lm	lm	lm	lm	ll	lm	lm	lm	ll	lm	ll	ll	lm	lm	lm	lm	lm	ll	lm	lm	lm	lm	lm	lm	ll	lm	ll	ll	ll	ll	ll	ll	lm	ll	lm	ll	lm	lm	ll	lm	ll	ll	ll	ll	ll
Marker9551	<lmxll>	lm	ll	ll	ll	ll	ll	ll	lm	ll	ll	ll	lm	ll	lm	ll	ll	ll	ll	ll	ll	lm	ll	ll	ll	ll	ll	ll	lm	ll	lm	lm	lm	lm	lm	lm	ll	lm	ll	lm	ll	ll	lm	ll	lm	lm	lm	lm	lm
Marker27774	<lmxll>	ll	ll	ll	ll	ll	ll	ll	lm	ll	ll	ll	lm	ll	lm	ll	ll	ll	ll	ll	ll	lm	ll	ll	ll	ll	ll	ll	ll	ll	lm	lm	lm	ll	lm	lm	ll	lm	ll	lm	ll	ll	lm	ll	lm	lm	lm	lm	lm
Marker42121	<efxeg>	--	ef	ee	ef	eg	ee	ef	--	--	ef	--	eg	--	--	ef	--	ee	ef	ef	ef	--	ef	ef	--	ef	--	ef	ef	ef	ee	--	ee	ef	--	--	ee	eg	ef	--	--	--	--	eg	eg	ee	--	--	ee
Marker8010	<efxeg>	--	ef	ee	ef	eg	--	ef	--	--	ef	ee	ee	ee	ee	ef	eg	--	ef	ef	ef	ee	ef	ef	--	ef	--	ef	ef	ef	ee	--	ee	ef	--	--	--	eg	--	--	ef	--	--	--	--	--	--	ee	eg
Marker5446	<lmxll>	ll	ll	lm	ll	ll	ll	ll	ll	ll	ll	lm	lm	ll	lm	ll	ll	lm	ll	ll	ll	lm	ll	ll	ll	ll	ll	ll	ll	ll	lm	lm	ll	ll	lm	lm	ll	ll	ll	lm	ll	ll	lm	ll	lm	ll	ll	lm	lm
Marker28436	<lmxll>	lm	lm	ll	lm	lm	lm	lm	ll	lm	lm	ll	ll	lm	ll	lm	lm	ll	lm	lm	lm	ll	lm	lm	lm	lm	lm	lm	lm	lm	ll	ll	lm	lm	ll	ll	lm	lm	lm	ll	lm	lm	lm	lm	lm	ll	lm	ll	ll
Marker122	<efxeg>	ef	ef	ee	ef	eg	--	ef	--	--	ef	ee	ee	--	ee	ef	--	ee	ef	ef	ef	ee	ef	ef	ef	ef	ef	ef	ef	ef	ee	--	ee	ef	--	--	--	eg	--	--	--	--	--	eg	--	--	eg	ee	ee
Marker36818	<lmxll>	lm	lm	ll	lm	lm	lm	lm	ll	lm	lm	ll	ll	lm	ll	lm	lm	ll	lm	lm	lm	ll	lm	lm	lm	lm	lm	lm	lm	lm	ll	ll	lm	lm	ll	ll	lm	ll	lm	ll	lm	lm	lm	lm	lm	ll	lm	ll	ll
Marker16538	<lmxll>	ll	ll	lm	ll	ll	ll	ll	ll	ll	ll	lm	lm	ll	lm	ll	ll	lm	ll	ll	ll	lm	ll	ll	ll	ll	ll	ll	ll	ll	lm	lm	ll	ll	lm	lm	ll	lm	ll	lm	ll	ll	lm	ll	lm	ll	lm	lm	lm
Marker39644	<lmxll>	lm	lm	ll	lm	lm	lm	lm	lm	lm	lm	lm	ll	lm	ll	lm	lm	ll	lm	lm	lm	ll	lm	lm	lm	lm	lm	lm	lm	lm	ll	ll	ll	lm	ll	ll	lm	ll	lm	ll	lm	lm	ll	lm	ll	lm	ll	ll	ll
Marker37028	<lmxll>	lm	lm	ll	lm	lm	lm	lm	lm	lm	lm	lm	lm	lm	ll	lm	lm	ll	lm	lm	lm	ll	lm	lm	lm	lm	lm	lm	lm	lm	ll	ll	ll	lm	ll	lm	lm	ll	lm	ll	lm	lm	ll	lm	ll	lm	ll	ll	ll
Marker44073	<lmxll>	lm	lm	ll	lm	lm	lm	lm	lm	lm	lm	lm	lm	lm	lm	lm	lm	ll	lm	lm	lm	ll	lm	lm	lm	lm	lm	lm	lm	lm	ll	ll	ll	lm	ll	lm	lm	ll	lm	ll	lm	lm	ll	lm	ll	lm	ll	ll	ll
Marker6381	<lmxll>	lm	lm	ll	lm	lm	lm	lm	ll	lm	lm	lm	ll	lm	ll	lm	lm	lm	lm	lm	lm	ll	lm	lm	lm	lm	lm	lm	lm	lm	ll	ll	ll	lm	ll	lm	lm	ll	lm	ll	lm	lm	ll	lm	ll	lm	ll	ll	ll
Marker12663	<lmxll>	lm	lm	ll	lm	lm	lm	lm	ll	lm	lm	lm	ll	lm	lm	lm	lm	lm	lm	lm	lm	ll	lm	lm	lm	lm	lm	lm	lm	lm	ll	ll	ll	lm	ll	lm	lm	ll	lm	ll	lm	lm	ll	lm	ll	lm	ll	ll	ll
Marker10369	<lmxll>	lm	lm	ll	lm	lm	lm	lm	ll	lm	lm	lm	ll	lm	lm	lm	lm	lm	lm	lm	lm	ll	lm	lm	lm	lm	lm	lm	lm	lm	ll	ll	ll	lm	ll	lm	lm	ll	lm	ll	lm	lm	ll	lm	ll	lm	ll	ll	ll
Marker17777	<efxeg>	ef	ef	ee	ef	eg	ee	ef	--	--	ef	eg	ee	--	ee	ef	--	--	ef	ef	ef	--	ef	ef	ef	ef	ef	ef	ef	ef	--	--	--	ef	--	--	--	--	ef	--	ef	--	ee	eg	--	--	--	ee	--
Marker38681	<efxeg>	--	ef	--	--	--	ef	--	ee	--	--	eg	ee	ef	eg	ef	ef	eg	--	--	ef	eg	--	--	--	--	--	--	--	--	eg	eg	eg	ef	--	ee	--	eg	--	ee	--	--	eg	ef	--	eg	ee	ee	eg
Marker16544	<lmxll>	ll	ll	lm	ll	ll	ll	ll	lm	lm	ll	lm	lm	ll	lm	ll	ll	lm	ll	ll	ll	lm	ll	ll	ll	ll	ll	ll	ll	ll	lm	lm	lm	ll	lm	lm	ll	lm	ll	lm	ll	ll	lm	ll	lm	lm	lm	lm	lm
Marker39510	<lmxll>	ll	ll	lm	ll	ll	ll	ll	lm	lm	ll	lm	lm	ll	lm	ll	ll	lm	ll	ll	ll	lm	ll	ll	ll	ll	ll	ll	ll	ll	lm	lm	lm	ll	lm	lm	ll	lm	ll	lm	ll	ll	lm	ll	lm	lm	lm	lm	lm
Marker19510	<lmxll>	lm	lm	ll	lm	lm	ll	lm	ll	ll	lm	ll	ll	lm	ll	lm	lm	ll	lm	lm	lm	ll	lm	lm	lm	lm	lm	lm	lm	lm	ll	ll	ll	lm	ll	ll	lm	ll	lm	ll	lm	lm	ll	lm	ll	ll	ll	ll	ll
Marker27771	<nnxnp>	nn	nn	nn	nn	np	np	nn	nn	np	nn	nn	np	np	np	np	np	nn	nn	np	np	np	np	nn	np	nn	np	np	np	np	np	np	np	nn	np	np	nn	np	nn	np	np	np	nn	np	np	np	np	np	nn
Marker27571	<lmxll>	lm	lm	ll	lm	lm	lm	lm	ll	ll	lm	ll	ll	lm	ll	lm	lm	ll	lm	lm	lm	ll	lm	lm	lm	lm	lm	lm	lm	lm	ll	ll	ll	lm	ll	ll	ll	lm	lm	ll	lm	lm	ll	lm	lm	ll	lm	ll	ll
Marker27772	<efxeg>	eg	eg	fg	eg	ee	ee	eg	fg	ef	eg	fg	ef	ee	--	ee	ee	fg	eg	ee	ee	ef	ee	eg	--	eg	ee	ee	ee	ee	ef	--	ef	eg	ef	ef	eg	ef	eg	--	ee	ee	--	ee	ef	ef	ef	ef	--
Marker27569	<abxcd>	bc	bc	ac	bc	bd	--	bc	ac	--	bc	ac	--	bd	ad	bd	bd	ac	bc	bd	bd	--	bd	bc	bd	bc	bd	bd	bd	bd	ad	--	ad	bc	--	--	bc	ad	bc	--	bd	bd	ad	bd	--	ad	ad	--	ac
Marker27775	<lmxll>	ll	ll	lm	ll	ll	lm	ll	lm	lm	ll	lm	lm	ll	lm	ll	lm	lm	ll	ll	ll	lm	ll	ll	lm	ll	ll	ll	ll	ll	lm	lm	lm	ll	lm	lm	ll	lm	ll	lm	ll	ll	lm	ll	lm	lm	lm	lm	lm
Marker36228	<lmxll>	lm	lm	ll	lm	lm	ll	lm	ll	ll	lm	ll	ll	lm	ll	lm	ll	ll	lm	lm	lm	ll	lm	lm	ll	lm	lm	lm	lm	lm	ll	ll	ll	lm	ll	ll	lm	ll	lm	ll	lm	lm	ll	lm	ll	ll	ll	ll	ll
Marker42276	<lmxll>	lm	lm	ll	lm	lm	ll	lm	ll	ll	lm	ll	ll	lm	ll	lm	lm	ll	lm	lm	lm	ll	lm	lm	ll	lm	lm	lm	lm	lm	ll	ll	ll	lm	ll	ll	lm	ll	lm	ll	ll	lm	ll	lm	ll	ll	ll	ll	ll
Marker44541	<lmxll>	lm	lm	ll	lm	lm	ll	lm	ll	ll	lm	ll	ll	lm	ll	lm	ll	ll	lm	lm	lm	ll	lm	lm	ll	lm	lm	lm	lm	lm	ll	ll	ll	lm	ll	ll	lm	ll	lm	ll	ll	lm	ll	lm	ll	ll	ll	ll	ll
Marker20450	<lmxll>	ll	ll	lm	ll	ll	ll	ll	lm	lm	ll	lm	lm	ll	lm	ll	ll	lm	ll	ll	ll	lm	ll	ll	ll	ll	ll	ll	ll	ll	lm	lm	lm	ll	lm	lm	lm	ll	ll	lm	ll	ll	ll	ll	ll	lm	ll	lm	lm
Marker20355	<lmxll>	ll	ll	lm	ll	lm	ll	ll	lm	lm	ll	lm	lm	ll	lm	ll	ll	lm	ll	ll	ll	lm	ll	ll	ll	ll	ll	ll	ll	ll	lm	lm	lm	ll	lm	lm	lm	ll	ll	lm	ll	ll	ll	lm	ll	lm	ll	lm	lm
Marker22055	<lmxll>	lm	lm	ll	lm	ll	lm	lm	ll	ll	lm	ll	ll	lm	ll	lm	lm	ll	lm	lm	lm	ll	lm	lm	lm	lm	lm	lm	lm	lm	ll	ll	ll	lm	ll	ll	ll	lm	lm	ll	lm	lm	lm	ll	lm	ll	lm	ll	ll
Marker10372	<nnxnp>	nn	nn	nn	nn	np	np	nn	nn	np	nn	nn	np	np	np	np	np	nn	nn	np	np	np	np	nn	np	nn	np	np	np	np	np	np	np	nn	np	np	nn	np	nn	np	np	np	np	np	np	np	np	nn	np
Marker1406	<lmxll>	lm	lm	ll	lm	ll	lm	lm	ll	lm	lm	ll	ll	lm	ll	lm	lm	ll	lm	lm	lm	ll	lm	lm	lm	lm	lm	lm	lm	lm	ll	ll	ll	lm	ll	ll	lm	ll	lm	ll	lm	lm	ll	lm	lm	ll	lm	ll	ll
Marker28437	<abxcd>	ad	ad	bd	ac	ac	ac	ad	bd	bc	ac	bd	bc	ac	bc	ac	--	bd	ad	--	ac	bc	ad	ad	ac	--	ac	ac	ac	ac	bc	bd	bc	--	bc	bc	ad	bc	--	--	ac	ad	--	--	--	bd	--	bd	bc
Marker24743	<abxcd>	ac	ac	bc	ad	bd	ac	ac	--	bc	ad	bc	--	--	--	ad	--	bc	ac	ad	--	bd	ac	ac	--	--	ad	ad	ad	ad	bd	bc	bd	--	bd	bd	ac	bd	ac	bd	ad	--	bd	ad	--	bc	bd	--	bd
Marker7390	<lmxll>	lm	lm	ll	lm	ll	lm	lm	ll	lm	lm	ll	ll	lm	ll	lm	lm	ll	lm	lm	lm	ll	lm	lm	lm	lm	lm	lm	lm	lm	ll	ll	ll	lm	ll	ll	ll	ll	lm	ll	lm	ll	ll	ll	lm	ll	lm	ll	ll
Marker21026	<lmxll>	lm	lm	ll	lm	ll	lm	lm	ll	lm	lm	ll	ll	lm	ll	lm	lm	ll	lm	lm	lm	ll	lm	lm	lm	lm	lm	lm	lm	lm	ll	ll	ll	lm	ll	ll	ll	ll	lm	ll	lm	ll	ll	ll	lm	ll	lm	ll	ll
Marker20680	<lmxll>	lm	lm	ll	lm	ll	lm	lm	ll	lm	lm	ll	ll	lm	ll	lm	lm	ll	lm	lm	lm	ll	lm	lm	lm	lm	lm	lm	lm	lm	ll	ll	ll	lm	ll	ll	ll	ll	lm	ll	lm	ll	ll	ll	lm	ll	lm	ll	ll
Marker21148	<lmxll>	lm	lm	ll	lm	ll	lm	lm	ll	lm	lm	ll	ll	lm	ll	lm	lm	ll	lm	lm	lm	ll	lm	lm	lm	lm	lm	lm	lm	lm	ll	ll	ll	lm	ll	ll	ll	ll	lm	ll	lm	ll	ll	ll	lm	ll	lm	ll	ll
Marker19013	<lmxll>	lm	ll	lm	ll	lm	ll	ll	lm	lm	ll	lm	lm	ll	lm	ll	lm	lm	ll	ll	ll	lm	ll	ll	ll	ll	lm	ll	ll	ll	lm	lm	lm	ll	lm	lm	lm	lm	ll	lm	ll	ll	lm	lm	lm	lm	lm	lm	lm
Marker42674	<nnxnp>	nn	nn	nn	np	np	nn	nn	nn	np	np	nn	np	np	np	np	np	nn	nn	np	np	np	nn	nn	np	np	np	np	np	np	np	nn	np	np	np	np	nn	np	nn	np	np	nn	np	np	np	np	np	nn	np
Marker24725	<nnxnp>	np	np	np	nn	nn	nn	np	np	nn	nn	np	nn	nn	nn	nn	nn	np	np	nn	nn	nn	np	np	nn	nn	nn	nn	nn	nn	nn	np	nn	nn	nn	nn	np	nn	np	nn	nn	np	nn	nn	nn	nn	nn	np	nn
Marker27206	<nnxnp>	np	np	np	nn	nn	nn	np	np	nn	nn	np	nn	nn	nn	nn	nn	np	np	nn	nn	nn	np	np	nn	nn	nn	nn	nn	nn	nn	np	nn	nn	nn	nn	np	nn	np	nn	nn	np	nn	nn	nn	nn	nn	np	nn
Marker38803	<nnxnp>	np	np	np	nn	nn	nn	np	np	nn	nn	np	nn	nn	nn	nn	nn	np	np	nn	nn	nn	np	np	nn	nn	nn	nn	nn	nn	nn	np	nn	nn	nn	nn	np	nn	np	nn	nn	np	nn	nn	nn	nn	nn	np	nn
Marker57113	<nnxnp>	np	np	np	nn	nn	nn	np	np	np	nn	np	nn	nn	nn	nn	nn	np	np	nn	nn	nn	np	np	nn	nn	nn	nn	nn	nn	nn	np	nn	nn	nn	nn	np	nn	np	nn	nn	nn	nn	nn	nn	np	nn	np	nn
Marker30390	<lmxll>	ll	lm	ll	ll	ll	lm	lm	ll	ll	lm	ll	ll	lm	ll	lm	ll	ll	lm	lm	lm	ll	lm	ll	lm	lm	ll	lm	lm	lm	ll	ll	ll	lm	ll	ll	lm	ll	lm	ll	lm	lm	ll	ll	ll	ll	ll	ll	ll
Marker44578	<nnxnp>	np	np	np	nn	nn	nn	np	np	np	nn	np	nn	nn	nn	nn	nn	np	np	nn	nn	nn	np	np	nn	nn	nn	nn	nn	nn	nn	np	nn	nn	nn	nn	np	nn	np	nn	nn	nn	nn	nn	nn	nn	nn	np	nn
Marker24806	<nnxnp>	nn	nn	nn	np	np	np	nn	nn	np	np	nn	np	np	np	np	np	nn	nn	np	np	np	nn	nn	np	np	np	np	np	np	np	np	np	np	np	np	nn	np	nn	np	np	np	np	np	np	np	np	nn	np
Marker30400	<abxcd>	--	--	--	ac	ac	bc	--	--	ac	bc	--	ac	bc	ac	bc	bc	--	--	bc	bc	ac	--	--	--	bc	--	bc	bc	bc	ac	--	ac	bc	ac	ac	--	ac	--	--	bc	--	--	ac	--	--	--	--	--
Marker14405	<nnxnp>	np	np	np	nn	nn	nn	np	np	np	nn	np	nn	nn	nn	nn	nn	np	np	nn	nn	nn	np	np	nn	nn	nn	nn	nn	nn	nn	nn	nn	nn	nn	nn	np	nn	np	nn	nn	nn	nn	nn	nn	nn	nn	np	nn
Marker32163	<nnxnp>	np	np	np	nn	nn	nn	np	np	np	nn	np	nn	nn	nn	nn	nn	np	np	nn	nn	nn	np	np	nn	nn	nn	nn	nn	nn	nn	nn	nn	nn	nn	nn	np	nn	np	nn	nn	nn	nn	nn	nn	nn	nn	np	nn
Marker32145	<efxeg>	eg	fg	eg	ee	ee	ef	fg	eg	eg	ef	eg	ee	ef	ee	ef	ef	eg	fg	ef	ef	ee	fg	eg	ef	ef	ee	ef	ef	ef	ee	--	--	ef	ee	ee	fg	ee	fg	ef	--	ef	ee	ee	ee	ee	ee	eg	ee
Marker40670	<nnxnp>	np	np	np	nn	nn	nn	np	np	np	nn	np	nn	nn	nn	nn	nn	np	np	nn	nn	nn	np	np	nn	nn	nn	nn	nn	nn	nn	nn	nn	nn	nn	nn	np	nn	np	nn	nn	nn	nn	nn	nn	nn	nn	np	nn
Marker32152	<nnxnp>	nn	nn	nn	np	np	np	nn	nn	nn	np	nn	np	np	np	np	np	nn	nn	np	np	np	nn	nn	np	np	np	np	np	np	np	np	np	np	np	np	nn	np	nn	np	np	np	nn	np	np	np	np	nn	np
Marker30398	<efxeg>	ef	ee	ef	--	fg	--	ee	--	ef	eg	ef	fg	ee	--	eg	--	ef	ee	eg	eg	--	ee	ef	--	eg	fg	eg	eg	eg	fg	--	--	eg	--	--	ee	--	ee	fg	--	ee	--	fg	fg	--	--	ef	--
Marker44570	<nnxnp>	np	np	np	nn	nn	nn	np	np	np	nn	np	nn	nn	nn	nn	nn	np	np	nn	nn	nn	np	np	nn	nn	nn	nn	nn	nn	nn	nn	nn	nn	nn	nn	np	nn	np	nn	nn	nn	np	nn	nn	nn	nn	np	nn
Marker46833	<nnxnp>	nn	nn	nn	np	np	np	nn	nn	nn	np	nn	np	np	np	np	np	nn	nn	np	np	np	np	nn	np	np	nn	np	np	np	np	np	np	np	np	np	nn	np	nn	np	np	np	np	np	np	np	np	nn	np
Marker42183	<nnxnp>	np	np	np	nn	nn	nn	np	np	np	nn	np	nn	nn	nn	nn	nn	np	np	nn	nn	np	nn	np	nn	nn	np	nn	nn	nn	nn	nn	nn	nn	nn	nn	np	nn	np	nn	nn	nn	nn	nn	nn	nn	nn	np	nn
Marker44905	<nnxnp>	np	np	np	nn	nn	nn	np	np	np	nn	np	nn	nn	nn	nn	nn	np	np	nn	nn	np	nn	np	nn	nn	np	nn	nn	nn	nn	nn	nn	nn	nn	nn	np	nn	np	nn	nn	nn	np	nn	nn	nn	nn	np	nn
Marker13458	<nnxnp>	np	np	np	nn	nn	nn	np	np	np	nn	np	nn	nn	nn	nn	nn	np	np	nn	nn	np	nn	np	nn	nn	np	nn	nn	nn	nn	nn	nn	nn	nn	nn	np	nn	np	nn	nn	nn	np	nn	nn	nn	nn	np	nn
Marker58458	<nnxnp>	np	np	np	nn	nn	nn	np	np	np	nn	np	nn	nn	nn	nn	nn	np	np	nn	nn	np	nn	np	nn	nn	np	nn	nn	nn	nn	nn	nn	nn	nn	nn	np	nn	np	nn	nn	nn	np	nn	nn	nn	nn	np	nn
Marker30968	<lmxll>	lm	ll	lm	lm	lm	ll	ll	ll	lm	lm	lm	lm	ll	lm	ll	ll	lm	ll	lm	ll	lm	ll	lm	ll	ll	lm	lm	lm	ll	lm	lm	lm	ll	lm	lm	ll	ll	ll	lm	ll	ll	lm	lm	lm	lm	lm	lm	lm
Marker33801	<lmxll>	lm	ll	lm	lm	lm	ll	ll	ll	lm	lm	lm	lm	ll	lm	ll	ll	lm	ll	lm	ll	lm	ll	lm	ll	ll	lm	lm	lm	ll	lm	lm	lm	ll	lm	lm	ll	ll	ll	lm	ll	ll	lm	lm	lm	lm	lm	lm	lm
Marker40662	<lmxll>	lm	ll	lm	lm	lm	ll	ll	ll	lm	lm	lm	lm	ll	lm	ll	ll	lm	ll	lm	ll	lm	ll	lm	ll	ll	lm	lm	lm	ll	lm	lm	lm	ll	lm	lm	ll	ll	ll	lm	ll	ll	lm	lm	lm	lm	lm	lm	lm
Marker13812	<lmxll>	lm	ll	lm	lm	lm	ll	ll	ll	lm	lm	lm	lm	ll	lm	ll	ll	lm	ll	lm	ll	lm	ll	lm	ll	ll	lm	lm	lm	ll	lm	lm	lm	ll	lm	lm	ll	ll	ll	lm	ll	ll	lm	lm	lm	lm	lm	lm	lm
Marker10696	<nnxnp>	nn	nn	nn	np	np	np	nn	nn	np	np	nn	np	nn	np	np	np	nn	nn	np	np	np	nn	nn	np	np	np	np	np	np	np	nn	np	np	np	np	nn	np	nn	np	np	nn	nn	np	np	np	nn	nn	np
Marker3171	<nnxnp>	np	np	np	nn	nn	np	np	np	nn	nn	np	nn	np	nn	nn	nn	np	np	nn	nn	nn	np	np	nn	nn	nn	nn	nn	nn	nn	np	nn	nn	nn	nn	np	nn	np	nn	nn	np	np	nn	nn	nn	np	np	nn
Marker40668	<lmxll>	lm	ll	lm	ll	lm	ll	ll	ll	lm	lm	lm	lm	ll	lm	ll	ll	lm	ll	lm	ll	lm	ll	lm	ll	ll	lm	lm	lm	ll	lm	lm	lm	ll	lm	lm	ll	ll	lm	lm	ll	ll	lm	lm	lm	lm	lm	lm	lm
Marker27184	<lmxll>	ll	lm	ll	lm	ll	lm	lm	lm	ll	ll	ll	ll	lm	ll	lm	lm	ll	lm	ll	lm	ll	lm	ll	lm	lm	ll	ll	ll	lm	ll	ll	ll	lm	ll	ll	lm	lm	ll	ll	lm	lm	ll	ll	ll	ll	ll	ll	ll
Marker19241	<nnxnp>	nn	nn	nn	np	np	np	nn	nn	np	np	nn	np	nn	np	np	np	nn	nn	np	np	np	nn	nn	np	np	nn	np	np	np	np	np	nn	np	np	np	nn	np	nn	np	np	nn	nn	np	np	np	nn	nn	np
Marker15614	<lmxll>	lm	ll	lm	ll	lm	ll	ll	ll	lm	lm	lm	lm	ll	lm	ll	ll	lm	ll	lm	ll	lm	ll	lm	ll	ll	lm	lm	lm	ll	lm	lm	lm	ll	lm	lm	ll	ll	lm	lm	ll	lm	lm	lm	lm	lm	lm	lm	lm
Marker40667	<lmxll>	ll	lm	ll	lm	ll	lm	lm	lm	ll	ll	ll	ll	lm	ll	lm	lm	ll	lm	ll	lm	ll	lm	ll	lm	lm	ll	ll	ll	lm	ll	ll	ll	lm	ll	ll	lm	lm	ll	ll	lm	ll	ll	ll	ll	ll	ll	ll	ll
Marker424	<nnxnp>	nn	nn	nn	np	np	np	nn	nn	np	np	nn	np	np	np	np	np	nn	nn	np	np	np	np	nn	np	np	nn	np	np	np	np	np	np	np	np	np	nn	np	nn	np	np	nn	nn	np	np	np	nn	nn	np
Marker27197	<lmxll>	lm	ll	lm	lm	lm	ll	ll	ll	lm	lm	lm	lm	ll	lm	lm	lm	lm	ll	lm	ll	lm	ll	lm	ll	ll	lm	lm	lm	ll	lm	lm	lm	lm	lm	lm	ll	ll	ll	lm	ll	lm	lm	lm	lm	lm	lm	lm	lm
Marker27195	<lmxll>	lm	lm	lm	lm	lm	lm	ll	lm	lm	lm	lm	lm	ll	lm	lm	lm	lm	ll	lm	ll	lm	ll	lm	ll	ll	lm	lm	lm	ll	lm	lm	lm	lm	lm	lm	ll	ll	ll	lm	ll	lm	lm	lm	lm	lm	ll	lm	lm
Marker30099	<nnxnp>	nn	nn	nn	np	np	np	nn	nn	np	np	nn	np	np	np	np	np	nn	nn	np	np	np	np	nn	np	np	nn	np	nn	np	np	np	np	np	np	np	nn	np	nn	np	np	nn	np	np	np	np	nn	nn	np
Marker17713	<efxeg>	ef	ef	ee	ee	ee	--	ef	fg	--	eg	ee	--	--	ee	ef	--	ee	ef	ee	ee	ee	ef	ee	--	ee	--	--	--	ef	ee	--	ee	ef	--	ee	ee	--	ee	--	ef	ee	--	ee	--	ee	--	ee	ee
Marker19873	<lmxll>	ll	ll	ll	ll	ll	ll	lm	ll	ll	ll	ll	ll	lm	ll	ll	ll	ll	ll	ll	lm	lm	lm	lm	lm	lm	ll	ll	ll	lm	ll	ll	ll	ll	ll	ll	lm	lm	lm	lm	ll	ll	lm	ll	ll	ll	lm	lm	ll
Marker43705	<nnxnp>	nn	nn	nn	np	np	np	nn	nn	np	np	np	np	np	np	np	np	nn	nn	np	np	np	np	nn	np	np	nn	np	nn	np	np	np	np	np	np	nn	nn	np	nn	np	np	nn	np	np	np	np	nn	nn	np
Marker24759	<lmxll>	lm	ll	lm	lm	lm	lm	ll	ll	lm	lm	ll	lm	ll	lm	lm	lm	lm	ll	lm	ll	lm	ll	lm	ll	lm	lm	lm	lm	ll	lm	lm	ll	lm	lm	lm	ll	ll	ll	ll	ll	ll	ll	lm	lm	lm	ll	ll	lm
Marker41823	<lmxll>	ll	lm	ll	ll	ll	ll	lm	lm	ll	ll	lm	ll	lm	ll	ll	lm	ll	lm	ll	lm	ll	lm	ll	lm	lm	ll	ll	ll	lm	ll	ll	lm	ll	ll	ll	lm	lm	lm	lm	lm	lm	lm	ll	ll	ll	lm	lm	ll
Marker35392	<lmxll>	ll	lm	ll	ll	ll	ll	lm	lm	ll	ll	lm	ll	lm	ll	ll	ll	ll	lm	ll	lm	lm	lm	ll	lm	ll	ll	ll	ll	lm	ll	lm	lm	ll	ll	ll	lm	lm	lm	lm	lm	lm	lm	ll	ll	lm	lm	lm	ll
Marker40382	<efxeg>	ef	ee	ee	fg	eg	fg	ee	ee	--	fg	ee	--	ee	--	fg	ee	--	ee	fg	eg	--	--	ee	--	ee	--	--	--	eg	fg	--	ee	fg	--	--	--	ef	--	--	fg	ee	ee	eg	--	--	--	ee	--
Marker35372	<lmxll>	ll	ll	lm	lm	ll	lm	ll	ll	lm	lm	ll	lm	ll	lm	lm	ll	lm	ll	lm	ll	ll	ll	ll	ll	ll	lm	lm	lm	ll	lm	ll	ll	lm	ll	ll	ll	ll	ll	ll	lm	ll	ll	ll	lm	ll	ll	ll	lm
Marker1504	<lmxll>	ll	ll	lm	lm	ll	lm	ll	ll	lm	lm	ll	lm	ll	lm	lm	ll	lm	ll	lm	ll	ll	ll	ll	ll	ll	lm	lm	lm	ll	lm	ll	ll	lm	ll	ll	ll	ll	ll	ll	lm	ll	ll	ll	lm	ll	ll	ll	lm
Marker5097	<abxcd>	--	--	--	ac	bc	ac	bd	bd	--	ac	bd	ac	bc	ac	ac	--	--	--	ac	bc	bc	bc	--	--	bc	--	ac	ac	bc	ac	ad	bc	ac	ac	ac	bd	bc	bd	bc	ac	bd	bc	bc	ac	ac	bc	--	ac
Marker7058	<lmxll>	ll	lm	ll	ll	lm	ll	lm	lm	ll	ll	lm	ll	lm	ll	ll	lm	ll	lm	ll	lm	lm	lm	lm	lm	lm	ll	ll	ll	lm	ll	ll	lm	ll	ll	ll	lm	lm	lm	lm	ll	lm	lm	ll	ll	ll	lm	lm	ll
Marker44543	<lmxll>	lm	ll	lm	lm	ll	ll	ll	lm	lm	ll	lm	lm	lm	lm	lm	ll	lm	lm	ll	lm	lm	ll	lm	lm	ll	ll	lm	lm	lm	lm	ll	lm	lm	lm	lm	lm	ll	lm	lm	ll	ll	lm	ll	lm	lm	lm	ll	lm
Marker7053	<lmxll>	ll	lm	ll	ll	ll	ll	lm	lm	ll	ll	lm	ll	lm	ll	ll	ll	ll	ll	ll	lm	lm	lm	ll	lm	lm	ll	ll	ll	lm	ll	lm	lm	ll	ll	ll	lm	lm	lm	lm	ll	lm	lm	lm	ll	lm	lm	lm	ll
Marker8292	<lmxll>	lm	ll	lm	lm	ll	lm	ll	ll	lm	lm	ll	lm	ll	lm	lm	lm	lm	lm	lm	ll	ll	ll	ll	ll	ll	lm	lm	lm	ll	lm	ll	ll	lm	lm	lm	ll	ll	ll	ll	lm	ll	ll	ll	lm	ll	ll	ll	lm
Marker43714	<lmxll>	lm	ll	lm	lm	ll	lm	ll	ll	lm	lm	ll	lm	ll	lm	lm	ll	lm	lm	lm	ll	ll	ll	ll	ll	ll	lm	lm	lm	ll	lm	ll	ll	lm	lm	lm	ll	ll	ll	ll	lm	ll	lm	ll	lm	ll	ll	ll	lm
Marker26009	<lmxll>	lm	ll	lm	lm	ll	lm	ll	ll	lm	lm	ll	lm	ll	lm	lm	ll	lm	lm	lm	ll	ll	ll	ll	ll	ll	lm	lm	lm	ll	lm	ll	ll	lm	lm	lm	ll	ll	ll	ll	lm	ll	lm	ll	lm	ll	ll	ll	lm
Marker43697	<efxeg>	--	fg	eg	ee	ef	eg	fg	fg	--	ee	ef	ee	ef	ee	ee	ef	--	eg	--	ef	ef	ef	fg	ef	ef	--	ee	--	ef	--	ee	ef	ee	ee	--	fg	ef	fg	ef	ee	fg	ef	ef	ee	--	fg	fg	ee
Marker22007	<lmxll>	lm	ll	lm	lm	ll	lm	ll	ll	lm	lm	ll	lm	ll	lm	lm	ll	lm	lm	lm	ll	ll	ll	ll	ll	ll	lm	lm	lm	ll	lm	lm	ll	lm	lm	lm	ll	ll	ll	ll	lm	lm	ll	ll	lm	lm	ll	ll	lm
Marker25564	<lmxll>	ll	lm	ll	ll	lm	ll	lm	lm	ll	ll	lm	ll	lm	ll	ll	lm	ll	ll	ll	lm	lm	lm	lm	lm	lm	ll	ll	ll	lm	ll	ll	lm	ll	ll	ll	lm	lm	lm	lm	ll	lm	lm	lm	ll	ll	lm	lm	ll
Marker21780	<lmxll>	ll	lm	ll	ll	lm	ll	lm	lm	ll	ll	lm	ll	lm	ll	ll	lm	ll	ll	ll	lm	lm	lm	lm	lm	lm	ll	ll	ll	lm	ll	lm	lm	ll	ll	ll	lm	lm	lm	lm	ll	lm	lm	lm	ll	ll	lm	lm	ll
Marker17205	<lmxll>	lm	ll	lm	lm	ll	lm	ll	ll	lm	lm	ll	lm	ll	lm	lm	ll	lm	lm	lm	ll	ll	ll	ll	ll	ll	lm	lm	lm	ll	lm	ll	ll	lm	lm	lm	ll	ll	ll	ll	lm	ll	ll	ll	lm	lm	ll	ll	lm
Marker19021	<lmxll>	lm	ll	lm	lm	ll	lm	ll	ll	lm	lm	ll	lm	ll	lm	lm	ll	lm	lm	lm	ll	ll	ll	ll	ll	ll	lm	lm	lm	ll	lm	lm	ll	lm	lm	lm	ll	ll	ll	ll	lm	ll	ll	ll	lm	lm	ll	ll	lm
Marker5101	<lmxll>	ll	lm	ll	ll	lm	ll	lm	lm	ll	ll	lm	ll	lm	ll	ll	lm	ll	ll	ll	lm	lm	lm	lm	lm	lm	ll	ll	ll	lm	ll	ll	lm	ll	ll	ll	lm	lm	lm	lm	ll	lm	lm	lm	ll	ll	lm	lm	ll
Marker19744	<lmxll>	ll	lm	ll	ll	lm	ll	lm	lm	ll	ll	lm	ll	lm	ll	ll	lm	ll	ll	ll	lm	lm	lm	lm	lm	lm	ll	ll	ll	lm	ll	ll	lm	ll	ll	lm	lm	lm	lm	lm	ll	lm	lm	lm	ll	ll	lm	lm	ll
Marker43692	<abxcd>	bc	ac	bc	--	ac	--	--	--	bc	bc	--	--	--	bc	--	--	--	--	--	--	--	--	--	--	ac	bc	--	bc	--	bc	--	--	bc	bc	--	--	ac	ac	ac	bc	--	--	ac	--	--	ac	--	ac
Marker35852	<lmxll>	lm	ll	lm	lm	ll	lm	ll	ll	lm	lm	ll	lm	ll	lm	lm	ll	lm	lm	lm	ll	ll	ll	ll	ll	ll	lm	lm	lm	ll	lm	ll	ll	lm	lm	lm	ll	ll	ll	ll	lm	ll	lm	ll	lm	ll	ll	ll	lm
Marker5100	<lmxll>	ll	ll	lm	lm	ll	lm	ll	ll	lm	lm	ll	lm	ll	lm	lm	ll	lm	lm	lm	ll	ll	ll	ll	ll	ll	lm	lm	lm	ll	lm	lm	ll	lm	lm	ll	ll	ll	ll	ll	lm	ll	ll	ll	lm	ll	ll	ll	lm
Marker25158	<lmxll>	ll	ll	lm	lm	ll	lm	ll	ll	lm	lm	ll	lm	ll	lm	lm	ll	lm	lm	lm	ll	ll	ll	ll	ll	ll	lm	lm	lm	ll	lm	lm	ll	lm	lm	ll	ll	ll	ll	ll	lm	ll	ll	ll	lm	ll	ll	ll	lm
Marker30102	<lmxll>	lm	ll	lm	lm	ll	lm	ll	ll	lm	lm	ll	lm	ll	lm	lm	ll	lm	lm	lm	ll	ll	ll	ll	ll	ll	lm	lm	lm	ll	lm	ll	ll	lm	lm	lm	ll	ll	ll	ll	lm	ll	ll	ll	lm	ll	ll	ll	ll
Marker8291	<lmxll>	lm	ll	lm	lm	ll	lm	ll	ll	lm	lm	ll	lm	ll	lm	lm	ll	lm	lm	lm	ll	ll	ll	ll	ll	ll	lm	lm	lm	ll	lm	ll	ll	lm	lm	lm	ll	ll	ll	ll	lm	ll	ll	ll	lm	ll	ll	ll	ll
Marker43715	<lmxll>	lm	ll	lm	lm	ll	lm	ll	ll	lm	lm	ll	lm	ll	lm	lm	ll	lm	lm	lm	ll	ll	ll	ll	ll	ll	lm	lm	lm	ll	lm	ll	ll	lm	ll	ll	ll	ll	ll	ll	lm	ll	ll	ll	lm	ll	ll	ll	ll
Marker13371	<lmxll>	ll	lm	ll	ll	lm	ll	lm	lm	ll	ll	lm	ll	lm	ll	ll	lm	ll	ll	ll	lm	lm	lm	lm	lm	lm	ll	ll	ll	lm	ll	lm	lm	ll	ll	lm	lm	lm	lm	lm	ll	lm	lm	lm	ll	lm	lm	lm	lm
Marker42014	<lmxll>	ll	ll	lm	lm	ll	lm	ll	ll	lm	lm	ll	lm	ll	lm	lm	ll	lm	ll	lm	ll	ll	ll	ll	ll	ll	lm	lm	lm	ll	lm	ll	ll	lm	ll	ll	ll	ll	ll	ll	lm	ll	ll	ll	lm	ll	ll	ll	lm
Marker18159	<lmxll>	ll	lm	ll	ll	lm	ll	lm	lm	ll	ll	lm	ll	lm	ll	ll	ll	ll	ll	ll	lm	lm	lm	lm	lm	lm	ll	ll	ll	lm	ll	ll	lm	ll	ll	ll	lm	lm	lm	lm	ll	ll	lm	lm	ll	ll	lm	lm	ll
Marker19019	<lmxll>	ll	lm	ll	ll	lm	ll	lm	lm	ll	ll	lm	ll	lm	ll	ll	ll	ll	ll	ll	lm	lm	lm	lm	lm	lm	ll	ll	ll	lm	ll	ll	lm	ll	ll	ll	lm	lm	lm	lm	ll	ll	lm	lm	ll	ll	lm	lm	ll
Marker43254	<lmxll>	ll	lm	ll	lm	lm	ll	lm	lm	ll	ll	lm	ll	lm	ll	ll	ll	ll	ll	ll	lm	lm	lm	lm	lm	lm	ll	ll	ll	lm	ll	lm	ll	ll	ll	ll	lm	lm	lm	lm	ll	lm	ll	lm	ll	ll	lm	lm	ll
Marker25017	<lmxll>	lm	lm	lm	lm	ll	lm	ll	ll	lm	lm	ll	lm	ll	lm	lm	lm	lm	lm	lm	ll	ll	ll	ll	ll	ll	lm	lm	lm	ll	lm	lm	lm	lm	lm	lm	ll	ll	ll	ll	lm	lm	ll	ll	lm	lm	ll	ll	lm
Marker32277	<lmxll>	ll	lm	ll	lm	lm	ll	lm	ll	ll	ll	lm	ll	lm	ll	ll	ll	ll	ll	ll	lm	lm	lm	lm	lm	lm	ll	ll	ll	lm	ll	lm	ll	ll	ll	ll	lm	lm	lm	lm	ll	lm	ll	lm	ll	ll	ll	lm	ll
Marker22003	<lmxll>	ll	lm	ll	lm	lm	ll	lm	ll	ll	ll	lm	ll	ll	ll	ll	ll	ll	ll	ll	lm	lm	lm	lm	ll	lm	ll	ll	ll	ll	ll	lm	ll	ll	ll	ll	ll	lm	lm	ll	ll	lm	ll	lm	ll	ll	ll	lm	ll
Marker5555	<lmxll>	ll	lm	ll	ll	lm	ll	lm	ll	ll	ll	ll	ll	ll	ll	ll	ll	ll	ll	ll	lm	ll	lm	ll	ll	lm	ll	ll	ll	ll	ll	lm	ll	ll	ll	ll	ll	lm	lm	ll	ll	lm	ll	lm	ll	ll	ll	lm	ll
Marker13383	<lmxll>	ll	lm	ll	ll	lm	ll	lm	ll	ll	ll	ll	ll	ll	ll	ll	lm	ll	ll	ll	lm	ll	lm	ll	ll	lm	ll	ll	ll	ll	ll	lm	ll	ll	ll	ll	ll	lm	ll	ll	ll	lm	ll	lm	ll	ll	ll	lm	ll
Marker41244	<lmxll>	ll	ll	ll	lm	ll	ll	ll	ll	ll	lm	ll	lm	ll	ll	ll	lm	lm	lm	lm	ll	ll	lm	ll	ll	ll	ll	ll	ll	lm	ll	lm	ll	lm	ll	ll	ll	lm	lm	lm	ll	ll	ll	lm	ll	ll	ll	lm	lm
Marker18525	<lmxll>	ll	ll	ll	lm	ll	ll	ll	ll	ll	lm	ll	lm	ll	ll	ll	lm	lm	lm	lm	ll	ll	lm	ll	ll	ll	ll	ll	ll	lm	ll	lm	ll	lm	ll	ll	ll	lm	lm	lm	ll	ll	ll	lm	ll	ll	ll	lm	lm
Marker33767	<lmxll>	ll	ll	ll	lm	ll	ll	ll	ll	ll	lm	ll	lm	ll	ll	ll	lm	lm	lm	lm	ll	ll	lm	ll	ll	ll	ll	ll	ll	lm	ll	lm	ll	lm	ll	ll	ll	lm	lm	lm	lm	ll	ll	lm	ll	ll	lm	lm	lm
Marker43980	<lmxll>	ll	ll	ll	ll	ll	ll	ll	ll	ll	lm	ll	lm	ll	ll	ll	lm	lm	lm	lm	ll	ll	lm	ll	lm	ll	ll	ll	ll	lm	ll	lm	ll	lm	ll	ll	ll	lm	lm	lm	lm	ll	ll	lm	ll	ll	lm	lm	lm
Marker18836	<lmxll>	lm	lm	lm	ll	lm	lm	lm	lm	lm	ll	lm	lm	lm	ll	lm	lm	lm	lm	ll	ll	lm	lm	lm	lm	ll	lm	lm	lm	ll	lm	ll	lm	lm	lm	lm	ll	ll	ll	ll	ll	ll	ll	ll	lm	lm	ll	ll	ll
Marker21429	<lmxll>	lm	lm	lm	lm	lm	lm	lm	ll	lm	ll	lm	lm	lm	ll	lm	lm	lm	lm	ll	lm	lm	lm	lm	lm	lm	lm	lm	lm	ll	lm	ll	lm	lm	lm	lm	ll	ll	ll	ll	ll	ll	ll	ll	lm	lm	ll	ll	ll
Marker37065	<lmxll>	lm	lm	lm	lm	lm	lm	lm	lm	lm	ll	lm	lm	lm	ll	lm	lm	lm	lm	ll	lm	lm	lm	lm	lm	lm	lm	lm	lm	ll	lm	ll	lm	lm	lm	lm	ll	ll	ll	ll	ll	ll	ll	ll	lm	lm	ll	ll	ll
Marker13729	<lmxll>	ll	ll	ll	ll	ll	ll	lm	lm	ll	lm	ll	lm	ll	lm	ll	lm	lm	lm	lm	ll	ll	lm	ll	ll	lm	ll	ll	ll	ll	ll	lm	ll	ll	ll	ll	ll	lm	lm	lm	lm	ll	ll	lm	ll	ll	lm	lm	lm
Marker22957	<lmxll>	lm	lm	lm	lm	lm	lm	ll	ll	lm	ll	lm	lm	lm	ll	lm	lm	lm	lm	ll	lm	ll	lm	lm	lm	lm	lm	lm	lm	ll	lm	ll	lm	lm	lm	lm	ll	ll	ll	ll	ll	ll	ll	ll	lm	lm	ll	ll	ll
Marker13904	<lmxll>	lm	lm	lm	lm	lm	ll	ll	lm	lm	lm	lm	lm	lm	ll	lm	lm	lm	lm	ll	lm	lm	lm	lm	lm	ll	lm	lm	lm	ll	lm	ll	lm	lm	lm	lm	ll	ll	ll	ll	ll	ll	ll	ll	lm	lm	ll	ll	ll
Marker33045	<lmxll>	lm	lm	lm	lm	lm	ll	ll	lm	ll	lm	lm	lm	lm	ll	lm	lm	lm	lm	ll	lm	lm	lm	lm	lm	ll	lm	lm	lm	ll	lm	ll	lm	lm	lm	lm	ll	ll	ll	ll	ll	ll	ll	ll	lm	lm	ll	ll	ll
Marker29089	<lmxll>	lm	lm	lm	lm	lm	lm	ll	ll	lm	ll	lm	lm	lm	ll	lm	ll	lm	ll	ll	lm	lm	ll	lm	ll	ll	lm	lm	lm	ll	lm	ll	lm	ll	lm	lm	lm	lm	ll	ll	ll	ll	lm	ll	lm	lm	ll	ll	ll
Marker24662	<lmxll>	ll	ll	ll	ll	ll	ll	lm	lm	ll	lm	ll	ll	ll	lm	ll	ll	ll	ll	lm	ll	lm	ll	ll	ll	ll	ll	ll	ll	lm	ll	lm	ll	ll	ll	ll	lm	lm	lm	lm	lm	lm	lm	lm	ll	ll	lm	lm	lm
Marker1820	<lmxll>	lm	lm	lm	lm	lm	lm	ll	ll	lm	ll	lm	lm	lm	ll	lm	ll	lm	ll	ll	lm	ll	ll	lm	lm	ll	lm	lm	lm	ll	lm	ll	lm	ll	lm	lm	lm	lm	ll	ll	ll	ll	lm	ll	lm	lm	ll	ll	ll
Marker39423	<lmxll>	lm	lm	lm	lm	lm	lm	ll	ll	lm	ll	lm	lm	lm	ll	lm	ll	lm	ll	ll	lm	ll	ll	lm	lm	ll	lm	lm	lm	ll	lm	ll	lm	lm	lm	lm	ll	lm	ll	lm	ll	ll	lm	ll	lm	lm	ll	ll	ll
Marker9558	<lmxll>	lm	lm	lm	lm	lm	lm	ll	ll	lm	ll	lm	lm	lm	ll	lm	ll	lm	ll	ll	lm	ll	ll	lm	lm	ll	lm	lm	lm	lm	lm	ll	lm	lm	lm	lm	ll	lm	ll	lm	ll	ll	lm	ll	lm	lm	ll	ll	ll
Marker9607	<lmxll>	ll	ll	ll	ll	ll	ll	lm	lm	ll	lm	ll	ll	ll	lm	ll	ll	ll	lm	lm	ll	lm	lm	ll	ll	lm	ll	ll	ll	lm	ll	lm	ll	ll	ll	ll	lm	ll	lm	ll	lm	lm	ll	lm	ll	ll	lm	lm	lm
Marker29813	<lmxll>	lm	lm	lm	lm	lm	lm	ll	ll	lm	ll	lm	lm	lm	ll	lm	lm	lm	ll	ll	lm	ll	ll	lm	ll	ll	lm	lm	lm	ll	lm	ll	lm	lm	lm	ll	ll	ll	ll	lm	ll	ll	ll	ll	lm	lm	ll	ll	ll
Marker44601	<lmxll>	ll	lm	lm	lm	lm	lm	ll	lm	lm	lm	lm	lm	lm	ll	lm	lm	lm	ll	ll	lm	lm	ll	lm	lm	ll	lm	lm	lm	ll	ll	ll	ll	lm	lm	lm	lm	lm	ll	lm	ll	ll	lm	ll	lm	lm	ll	ll	ll
Marker36642	<nnxnp>	nn	np	np	nn	np	nn	nn	np	np	np	np	nn	nn	np	np	nn	np	np	np	np	nn	nn	np	nn	np	np	np	nn	np	np	nn	nn	nn	np	np	np	np	np	nn	nn	np	nn	nn	nn	np	np	np	nn
Marker36045	<lmxll>	lm	lm	lm	lm	lm	lm	ll	lm	lm	ll	lm	lm	lm	ll	lm	lm	lm	ll	ll	lm	ll	ll	lm	lm	ll	lm	lm	lm	ll	lm	lm	lm	lm	lm	lm	ll	ll	ll	lm	ll	ll	lm	ll	lm	lm	ll	ll	ll
Marker34961	<lmxll>	lm	lm	lm	lm	lm	lm	ll	lm	lm	ll	lm	lm	lm	ll	lm	lm	lm	ll	ll	lm	ll	ll	lm	lm	ll	lm	lm	lm	ll	lm	ll	lm	lm	lm	lm	ll	ll	ll	lm	ll	ll	lm	ll	lm	lm	ll	ll	ll
Marker41873	<lmxll>	ll	ll	ll	ll	ll	ll	lm	ll	ll	lm	ll	ll	ll	lm	ll	ll	ll	lm	lm	ll	lm	lm	ll	ll	lm	ll	ll	ll	lm	ll	lm	ll	ll	ll	ll	lm	lm	lm	ll	lm	lm	ll	lm	ll	ll	lm	lm	lm
Marker18914	<efxeg>	ee	--	--	--	ee	ee	--	--	--	ef	--	--	--	ef	--	--	ee	ef	--	ee	--	ef	ee	--	ef	--	ee	--	ef	--	--	--	ee	--	ee	--	--	--	--	--	ef	--	--	--	--	--	--	--
Marker43975	<lmxll>	lm	lm	lm	lm	lm	lm	ll	ll	lm	ll	lm	lm	lm	ll	lm	lm	lm	ll	ll	lm	ll	ll	lm	lm	ll	lm	lm	lm	ll	lm	ll	lm	lm	lm	lm	ll	ll	ll	lm	ll	ll	lm	ll	lm	lm	ll	ll	ll
Marker39609	<lmxll>	ll	ll	ll	ll	ll	ll	lm	lm	ll	lm	ll	ll	ll	lm	ll	ll	ll	lm	lm	ll	lm	lm	ll	ll	lm	ll	ll	ll	lm	ll	lm	ll	ll	ll	ll	lm	lm	lm	ll	lm	lm	ll	lm	ll	ll	lm	lm	lm
Marker19208	<lmxll>	ll	ll	ll	ll	ll	ll	lm	lm	ll	lm	ll	ll	ll	lm	ll	ll	ll	lm	lm	ll	lm	lm	ll	ll	lm	ll	ll	ll	lm	ll	lm	ll	ll	ll	ll	lm	lm	lm	ll	lm	lm	ll	lm	ll	ll	lm	lm	lm
Marker4421	<lmxll>	ll	ll	ll	ll	ll	ll	lm	lm	ll	lm	ll	ll	ll	lm	ll	ll	ll	lm	lm	ll	lm	lm	ll	ll	lm	ll	ll	ll	lm	ll	ll	ll	ll	ll	ll	lm	lm	lm	ll	lm	lm	ll	lm	ll	ll	lm	lm	lm
Marker13855	<lmxll>	ll	ll	ll	ll	ll	ll	lm	lm	ll	lm	ll	ll	ll	lm	ll	ll	ll	lm	lm	ll	lm	lm	ll	ll	lm	ll	ll	ll	lm	ll	ll	ll	ll	ll	ll	lm	lm	lm	ll	lm	lm	ll	lm	ll	ll	lm	lm	lm
Marker30371	<lmxll>	ll	ll	ll	ll	ll	ll	lm	lm	ll	lm	ll	ll	ll	lm	ll	ll	ll	lm	lm	ll	lm	lm	ll	ll	lm	ll	ll	ll	lm	ll	ll	ll	ll	ll	ll	lm	lm	lm	ll	lm	lm	ll	lm	ll	ll	lm	lm	lm
Marker12570	<lmxll>	lm	ll	ll	ll	ll	ll	lm	lm	ll	lm	ll	ll	ll	lm	ll	ll	ll	lm	lm	ll	lm	lm	ll	ll	lm	ll	ll	ll	lm	ll	ll	ll	ll	ll	ll	lm	lm	lm	ll	lm	lm	ll	lm	ll	ll	lm	lm	lm
Marker43580	<abxcd>	--	bd	bd	bc	bd	bc	ad	--	bd	ad	--	--	bc	ad	bd	--	bd	ad	ad	bd	ac	ac	bd	--	ad	bd	bd	--	ad	bd	--	--	--	bd	bd	ad	ad	ad	--	ac	--	--	ac	--	--	ad	--	--
Marker27852	<efxeg>	ef	ef	ef	ef	ef	--	ee	ee	ef	ee	ef	ef	eg	ee	--	--	ef	ee	ee	ef	ee	eg	--	ef	ee	--	ef	ef	ee	ef	--	ef	ef	ef	ef	ee	ee	ee	ef	--	ee	--	eg	--	ef	ee	ee	ee
Marker21856	<lmxll>	ll	ll	ll	ll	ll	ll	lm	lm	ll	lm	ll	ll	ll	lm	ll	lm	ll	lm	lm	ll	lm	lm	ll	ll	lm	ll	ll	ll	lm	ll	lm	ll	ll	ll	ll	lm	lm	lm	ll	lm	lm	ll	lm	ll	ll	lm	lm	lm
Marker37354	<lmxll>	lm	lm	lm	lm	lm	lm	ll	ll	lm	ll	lm	lm	lm	ll	lm	ll	lm	ll	ll	lm	ll	ll	lm	lm	ll	lm	lm	lm	ll	lm	ll	lm	lm	lm	lm	ll	ll	ll	lm	ll	ll	lm	ll	lm	lm	ll	ll	ll
Marker4435	<lmxll>	lm	lm	lm	lm	lm	lm	ll	ll	lm	ll	lm	lm	lm	ll	lm	ll	lm	ll	ll	lm	ll	ll	lm	lm	ll	lm	lm	lm	ll	lm	ll	lm	lm	lm	lm	ll	ll	ll	lm	ll	ll	lm	ll	lm	lm	ll	ll	ll
Marker14494	<nnxnp>	nn	np	np	nn	np	nn	nn	np	np	np	np	nn	nn	np	np	nn	np	np	np	np	nn	nn	np	nn	np	np	np	nn	nn	np	nn	nn	nn	np	np	np	np	np	nn	nn	np	np	nn	nn	np	np	np	nn
Marker5778	<nnxnp>	nn	np	np	nn	np	nn	nn	np	np	np	np	nn	nn	np	np	nn	np	np	np	np	nn	nn	np	nn	np	np	np	nn	nn	np	nn	nn	nn	np	np	np	np	np	nn	nn	np	np	nn	nn	np	np	np	nn
Marker19206	<lmxll>	ll	ll	ll	ll	ll	ll	lm	lm	ll	lm	ll	ll	ll	lm	ll	lm	ll	lm	lm	ll	lm	lm	ll	ll	lm	ll	ll	ll	lm	ll	lm	ll	ll	ll	lm	lm	lm	lm	ll	lm	lm	ll	lm	ll	ll	lm	lm	lm
Marker17037	<lmxll>	lm	lm	lm	lm	lm	lm	ll	ll	lm	ll	lm	lm	lm	ll	lm	ll	lm	ll	ll	lm	ll	ll	lm	ll	ll	lm	lm	lm	ll	lm	ll	lm	lm	lm	ll	ll	ll	ll	lm	ll	ll	lm	ll	lm	lm	ll	ll	ll
Marker34970	<lmxll>	lm	lm	lm	lm	lm	lm	ll	ll	lm	ll	lm	lm	lm	ll	lm	ll	lm	ll	ll	lm	ll	ll	lm	ll	ll	lm	lm	lm	ll	lm	ll	lm	lm	lm	ll	ll	ll	ll	lm	ll	ll	lm	ll	lm	lm	ll	ll	ll
Marker13851	<lmxll>	lm	ll	ll	ll	ll	ll	lm	lm	ll	lm	ll	ll	ll	lm	ll	ll	ll	lm	lm	ll	ll	lm	ll	ll	lm	ll	ll	ll	lm	lm	ll	ll	ll	ll	ll	ll	lm	lm	ll	lm	lm	ll	lm	ll	ll	lm	lm	lm
Marker36073	<efxeg>	--	ef	ef	fg	ef	fg	--	ee	ef	--	ef	--	fg	--	ef	--	ef	--	ee	ef	--	--	ef	ee	--	--	ef	--	--	ef	--	ef	fg	--	ee	ee	--	--	ef	--	ee	--	--	fg	ef	ee	ee	--
Marker9602	<lmxll>	ll	lm	lm	lm	lm	lm	ll	ll	lm	ll	lm	lm	lm	ll	lm	lm	lm	ll	ll	lm	lm	ll	lm	lm	ll	lm	lm	lm	ll	ll	lm	lm	lm	lm	lm	lm	ll	ll	lm	ll	ll	lm	ll	lm	lm	ll	ll	ll
Marker27867	<nnxnp>	nn	np	np	nn	np	nn	np	np	np	np	np	nn	nn	np	np	nn	np	np	np	np	nn	nn	np	np	np	np	np	nn	nn	np	nn	np	nn	np	np	np	np	np	np	nn	np	nn	nn	np	np	np	np	nn
Marker15062	<lmxll>	ll	lm	lm	lm	lm	lm	ll	lm	lm	lm	lm	lm	lm	ll	lm	lm	lm	ll	ll	lm	lm	ll	lm	lm	ll	lm	lm	lm	ll	ll	ll	ll	lm	lm	lm	lm	lm	ll	lm	ll	ll	lm	ll	lm	lm	ll	ll	ll
Marker34727	<lmxll>	ll	ll	ll	ll	ll	lm	lm	ll	ll	ll	ll	ll	ll	lm	ll	ll	ll	ll	lm	ll	ll	lm	ll	ll	lm	ll	ll	ll	lm	lm	lm	ll	ll	ll	ll	lm	lm	lm	lm	lm	lm	lm	lm	ll	ll	lm	lm	lm
Marker1645	<efxeg>	ef	ef	ef	ee	ef	ee	ee	--	ee	--	ee	ef	ef	--	ef	ef	ef	--	--	ee	ee	ef	ef	ef	--	ef	ef	ef	--	ee	--	ef	ef	ef	ef	ee	ee	--	ee	--	ee	ee	--	--	--	ee	--	--
Marker60445	<nnxnp>	nn	np	np	nn	np	nn	np	np	np	np	np	nn	nn	np	np	nn	np	np	np	np	nn	nn	np	np	np	np	np	nn	nn	np	nn	np	nn	np	np	np	np	np	np	nn	np	nn	np	np	np	np	np	nn
Marker20720	<efxeg>	ef	ef	ee	ee	ef	ef	--	--	ee	ee	ef	ef	ef	ee	ef	ef	ef	--	--	ee	ee	ee	ef	ef	ee	ef	ef	--	--	ef	--	ef	ef	ef	ef	ee	ee	--	--	--	ee	ee	--	--	--	--	--	ee
Marker40711	<efxeg>	--	ef	ef	ef	ef	--	--	ef	--	ef	--	ef	ef	ee	ef	--	--	--	ee	ef	ef	ee	ef	--	--	ef	--	--	--	--	ee	ee	--	ef	ef	--	ee	ee	ef	--	ee	eg	--	--	ef	--	ee	--
Marker29019	<lmxll>	lm	ll	ll	lm	lm	ll	ll	ll	lm	ll	ll	lm	ll	lm	ll	ll	ll	ll	lm	ll	ll	ll	ll	ll	ll	lm	ll	ll	lm	lm	lm	ll	ll	lm	lm	lm	lm	lm	lm	ll	lm	lm	ll	lm	ll	lm	lm	lm
Marker11032	<lmxll>	ll	lm	lm	ll	ll	lm	lm	lm	ll	lm	lm	ll	lm	ll	lm	lm	lm	lm	ll	lm	lm	lm	lm	lm	lm	ll	lm	lm	ll	ll	ll	lm	lm	ll	lm	ll	lm	ll	ll	lm	ll	ll	lm	ll	lm	ll	ll	ll
Marker33854	<efxeg>	ee	--	ef	eg	--	--	ef	ef	eg	--	--	--	--	ee	ef	--	--	ef	ee	--	ef	fg	--	--	--	--	ef	fg	eg	ee	eg	--	--	ee	ee	ee	ee	--	ee	--	ee	ee	--	ee	--	ee	ee	ee
Marker19304	<lmxll>	ll	lm	lm	lm	lm	lm	ll	lm	lm	lm	lm	lm	lm	ll	lm	lm	lm	lm	ll	lm	lm	ll	lm	lm	lm	ll	lm	lm	ll	ll	ll	ll	lm	lm	lm	lm	lm	ll	lm	lm	ll	lm	ll	ll	lm	ll	ll	ll
Marker14936	<lmxll>	ll	lm	lm	lm	lm	lm	ll	lm	lm	lm	lm	lm	lm	ll	lm	lm	lm	lm	ll	lm	lm	ll	lm	lm	lm	ll	lm	lm	ll	ll	ll	ll	lm	lm	lm	lm	lm	ll	lm	lm	ll	lm	ll	ll	lm	ll	ll	ll
Marker64389	<nnxnp>	nn	np	np	nn	np	nn	np	np	np	np	np	nn	nn	np	np	np	np	np	np	np	np	nn	np	np	np	np	np	nn	nn	np	nn	np	np	np	np	np	np	np	np	nn	np	np	np	nn	np	np	np	nn
Marker51923	<nnxnp>	np	nn	nn	np	nn	np	nn	nn	nn	nn	nn	np	np	nn	nn	nn	nn	nn	nn	nn	nn	np	nn	nn	nn	nn	nn	np	np	nn	np	nn	nn	nn	nn	nn	nn	nn	nn	np	nn	nn	nn	np	nn	nn	nn	np
Marker36783	<lmxll>	ll	lm	lm	ll	ll	lm	lm	lm	ll	lm	lm	ll	lm	ll	lm	lm	lm	lm	ll	lm	lm	ll	lm	lm	lm	ll	lm	lm	ll	ll	ll	lm	lm	ll	lm	lm	lm	ll	lm	lm	lm	ll	lm	ll	lm	ll	ll	ll
Marker21673	<nnxnp>	np	np	np	nn	np	nn	np	np	np	np	np	nn	nn	np	np	np	np	np	np	np	np	nn	np	np	np	np	np	nn	nn	np	nn	np	np	np	np	np	np	np	np	nn	np	np	np	nn	np	np	np	nn
Marker36112	<lmxll>	lm	ll	ll	ll	ll	ll	ll	ll	ll	ll	ll	ll	ll	lm	ll	ll	ll	lm	lm	ll	ll	lm	ll	ll	ll	lm	ll	ll	lm	lm	lm	lm	ll	ll	ll	ll	ll	lm	ll	ll	lm	ll	ll	ll	ll	lm	lm	lm
Marker2535	<abxcd>	--	ad	ad	ac	ac	--	bd	--	--	ad	ad	ac	--	bd	ad	--	ad	--	bd	ad	--	bc	ad	ac	bd	bd	ad	ac	bc	bd	--	ad	ad	--	--	--	--	--	--	--	--	--	bd	--	--	--	--	--
Marker51420	<nnxnp>	nn	nn	nn	np	nn	np	nn	nn	nn	nn	nn	np	np	nn	nn	nn	nn	nn	nn	nn	nn	np	nn	nn	nn	nn	nn	np	np	nn	np	nn	nn	nn	nn	nn	nn	nn	nn	np	nn	nn	nn	np	nn	nn	nn	np
Marker12859	<lmxll>	lm	ll	ll	lm	lm	ll	ll	ll	lm	ll	ll	lm	ll	lm	ll	ll	ll	ll	lm	ll	ll	lm	ll	ll	ll	lm	ll	ll	lm	lm	lm	ll	ll	lm	ll	ll	ll	lm	ll	ll	lm	lm	ll	lm	ll	lm	lm	lm
Marker12071	<efxeg>	--	ee	ee	ee	ee	ee	ef	--	ef	ee	ee	ee	ee	--	ee	ee	ee	ee	--	ee	ee	ef	ee	--	ee	--	ee	ee	ee	--	--	--	ee	--	--	ee	ee	--	ee	ee	--	ee	ef	ee	ee	ef	--	ef
Marker35732	<nnxnp>	nn	nn	nn	np	nn	np	nn	nn	nn	nn	nn	np	np	nn	nn	nn	nn	nn	nn	nn	nn	np	nn	nn	nn	nn	nn	np	np	nn	np	nn	nn	nn	nn	nn	nn	nn	nn	np	nn	nn	nn	np	nn	nn	nn	np
Marker22446	<lmxll>	lm	ll	ll	lm	ll	ll	ll	ll	lm	ll	ll	ll	ll	lm	ll	ll	ll	ll	lm	ll	ll	lm	ll	ll	ll	lm	ll	ll	ll	lm	lm	ll	ll	lm	ll	ll	ll	lm	ll	ll	lm	lm	ll	lm	ll	lm	lm	lm
Marker33315	<lmxll>	ll	lm	lm	ll	lm	lm	lm	lm	ll	lm	lm	lm	lm	ll	lm	lm	lm	lm	ll	lm	lm	ll	lm	lm	lm	ll	lm	lm	lm	ll	ll	lm	lm	ll	lm	lm	lm	ll	lm	lm	ll	ll	lm	ll	lm	ll	ll	ll
Marker27336	<lmxll>	ll	lm	lm	lm	lm	lm	lm	lm	lm	lm	lm	lm	lm	ll	lm	lm	lm	lm	ll	lm	lm	ll	lm	lm	lm	ll	lm	lm	ll	ll	ll	lm	lm	ll	lm	lm	lm	ll	lm	lm	ll	lm	ll	ll	lm	ll	ll	ll
Marker12068	<lmxll>	lm	ll	ll	ll	ll	ll	ll	ll	ll	ll	ll	ll	ll	lm	ll	ll	ll	ll	lm	ll	ll	lm	ll	ll	ll	lm	ll	ll	lm	lm	lm	ll	ll	lm	ll	ll	ll	lm	ll	ll	lm	ll	lm	lm	ll	lm	lm	lm
Marker2004	<lmxll>	lm	ll	ll	ll	ll	ll	ll	ll	ll	ll	ll	ll	ll	lm	ll	ll	ll	ll	lm	ll	ll	lm	ll	ll	ll	lm	ll	ll	lm	lm	lm	ll	ll	lm	ll	ll	ll	lm	ll	ll	lm	ll	lm	lm	ll	lm	lm	lm
Marker12045	<lmxll>	ll	lm	lm	lm	lm	lm	lm	lm	lm	lm	lm	lm	lm	ll	lm	lm	lm	lm	ll	lm	lm	ll	lm	lm	lm	ll	lm	lm	ll	ll	ll	lm	lm	ll	lm	lm	lm	ll	lm	lm	ll	lm	lm	lm	lm	ll	ll	ll
Marker12070	<nnxnp>	nn	nn	nn	np	np	np	nn	nn	np	nn	nn	np	nn	nn	nn	nn	nn	nn	nn	nn	nn	np	nn	nn	nn	nn	nn	np	np	nn	np	nn	nn	nn	nn	nn	nn	nn	nn	np	np	nn	nn	np	nn	nn	nn	nn
Marker12021	<abxcd>	bc	ac	--	ad	ad	--	ac	--	--	ac	ac	ad	ac	bc	ac	ac	ac	ac	bc	ac	ac	bd	ac	--	ac	bc	--	ad	bd	bc	--	--	ac	--	ac	--	--	--	--	ad	--	--	--	--	--	--	--	bd
Marker1169	<efxeg>	ef	ee	ee	eg	eg	eg	ee	ee	eg	ee	ee	eg	ee	ef	ee	ee	--	ee	ef	--	ee	fg	ee	ee	ee	ef	ee	eg	fg	ef	--	ee	--	--	ee	ee	ee	ee	ee	eg	--	ee	ef	fg	ee	fg	ef	fg
Marker37876	<nnxnp>	np	np	np	nn	nn	nn	np	np	np	np	np	nn	np	np	np	np	np	np	np	np	np	nn	np	np	np	np	np	nn	nn	np	nn	np	np	np	np	np	np	np	np	nn	nn	np	np	nn	np	np	np	nn
Marker12037	<lmxll>	lm	ll	ll	ll	ll	ll	ll	ll	lm	ll	ll	ll	ll	lm	ll	ll	ll	ll	lm	ll	ll	lm	ll	ll	ll	lm	ll	ll	lm	lm	lm	ll	ll	lm	ll	ll	ll	lm	ll	ll	lm	ll	ll	ll	ll	lm	lm	lm
Marker63076	<nnxnp>	nn	nn	nn	np	np	np	nn	nn	nn	nn	nn	np	nn	nn	nn	nn	nn	nn	nn	nn	nn	np	nn	nn	nn	nn	nn	np	np	nn	np	nn	nn	nn	nn	nn	nn	nn	nn	np	np	nn	nn	np	nn	np	nn	np
Marker5653	<nnxnp>	np	np	np	nn	nn	nn	np	np	np	np	np	nn	np	np	np	np	np	np	np	np	np	nn	np	np	np	np	np	nn	nn	np	nn	np	np	np	np	np	np	np	np	nn	np	np	np	nn	np	nn	np	nn
Marker34729	<nnxnp>	np	np	np	nn	nn	nn	np	np	np	np	np	nn	np	np	np	np	np	np	np	np	np	nn	np	np	np	np	np	nn	nn	np	nn	np	np	np	np	np	np	np	np	nn	nn	np	np	nn	np	nn	np	nn
Marker12970	<lmxll>	lm	ll	ll	ll	ll	ll	ll	ll	lm	ll	ll	ll	ll	lm	ll	ll	ll	ll	lm	ll	ll	lm	ll	ll	ll	lm	ll	ll	ll	lm	lm	ll	ll	lm	ll	ll	ll	lm	ll	ll	lm	lm	ll	lm	ll	ll	lm	lm
Marker14196	<lmxll>	lm	ll	ll	ll	ll	ll	ll	ll	lm	ll	ll	ll	ll	lm	ll	ll	ll	ll	lm	ll	ll	lm	ll	ll	ll	lm	ll	ll	ll	lm	lm	ll	ll	lm	ll	ll	ll	lm	ll	ll	lm	ll	ll	ll	ll	ll	lm	lm
Marker51781	<nnxnp>	np	np	np	nn	nn	nn	np	np	np	np	np	nn	np	np	np	np	np	np	np	np	np	nn	np	np	np	np	np	nn	nn	np	nn	np	np	np	np	np	np	np	np	nn	nn	np	np	nn	np	nn	np	nn
Marker47080	<nnxnp>	np	np	np	nn	nn	nn	np	np	np	np	np	nn	np	np	np	np	np	np	np	np	np	nn	np	np	np	np	np	nn	nn	np	nn	np	np	np	np	np	np	np	np	nn	nn	np	np	nn	np	nn	np	nn
Marker13183	<nnxnp>	np	np	np	nn	nn	nn	np	np	np	np	np	nn	np	np	np	np	np	np	np	np	np	nn	np	np	np	np	np	nn	nn	np	nn	np	np	np	np	np	np	np	np	nn	nn	np	np	nn	np	nn	np	nn
Marker38256	<nnxnp>	np	np	np	nn	nn	nn	np	np	np	np	np	nn	np	np	np	np	np	np	np	np	np	nn	np	np	np	np	np	nn	nn	np	nn	np	np	np	np	np	np	np	np	nn	nn	np	np	nn	np	nn	np	nn
Marker28885	<nnxnp>	np	np	np	nn	nn	nn	np	np	np	np	np	nn	np	np	np	np	np	np	np	np	np	nn	np	np	np	np	np	nn	nn	np	nn	np	np	np	np	np	np	np	np	nn	nn	np	np	nn	np	nn	np	nn
Marker22344	<nnxnp>	nn	nn	nn	np	np	np	nn	nn	nn	nn	nn	np	nn	nn	nn	nn	nn	nn	nn	nn	nn	np	nn	nn	nn	nn	nn	np	np	nn	np	nn	nn	nn	nn	nn	nn	nn	nn	np	np	nn	nn	np	nn	np	nn	np
Marker40527	<nnxnp>	np	np	np	nn	nn	nn	np	np	np	np	np	nn	np	np	np	np	np	np	np	np	np	nn	np	np	np	np	np	nn	nn	np	nn	np	np	np	np	np	np	np	np	nn	nn	np	np	nn	np	nn	np	nn
Marker22329	<lmxll>	ll	lm	lm	lm	lm	lm	lm	lm	ll	lm	lm	lm	lm	ll	lm	lm	lm	lm	ll	lm	lm	lm	lm	lm	lm	ll	lm	lm	ll	ll	ll	lm	lm	ll	ll	lm	lm	lm	lm	lm	lm	lm	ll	ll	lm	lm	ll	ll
Marker25205	<lmxll>	ll	lm	lm	lm	lm	lm	lm	lm	ll	lm	lm	lm	lm	ll	lm	lm	lm	lm	ll	lm	lm	lm	lm	lm	lm	ll	lm	lm	lm	ll	ll	lm	lm	ll	ll	lm	lm	lm	lm	lm	lm	lm	ll	ll	lm	lm	ll	ll
Marker37319	<nnxnp>	nn	np	nn	np	np	np	nn	nn	nn	nn	nn	np	nn	nn	nn	nn	nn	nn	nn	nn	nn	np	nn	nn	nn	nn	nn	np	np	nn	np	nn	nn	nn	nn	nn	nn	nn	nn	np	np	nn	nn	np	nn	nn	nn	np
Marker64524	<nnxnp>	nn	np	nn	np	np	np	nn	nn	nn	nn	nn	np	nn	nn	nn	nn	nn	nn	nn	nn	nn	np	nn	nn	nn	nn	nn	np	np	nn	np	nn	nn	nn	nn	nn	nn	nn	nn	np	np	nn	nn	np	nn	nn	nn	np
Marker41890	<efxeg>	--	--	--	--	fg	--	ee	--	--	ee	ee	eg	ee	ee	ee	ee	ee	ee	ee	ee	ee	--	ee	--	ee	ef	--	eg	--	ef	--	ee	ee	--	--	--	--	--	--	--	--	--	--	--	--	--	--	--
Marker45911	<nnxnp>	np	nn	np	nn	nn	nn	np	np	np	np	np	nn	np	np	np	np	np	np	np	np	np	nn	np	np	np	nn	np	nn	nn	np	nn	np	np	np	np	np	np	np	np	nn	nn	np	np	nn	np	nn	np	nn
Marker19345	<nnxnp>	nn	np	nn	np	np	np	nn	nn	np	nn	nn	np	nn	nn	nn	nn	nn	nn	nn	nn	nn	np	nn	nn	nn	nn	nn	np	np	nn	np	nn	nn	nn	nn	nn	nn	nn	nn	np	np	nn	nn	np	nn	np	nn	np
Marker46451	<nnxnp>	nn	np	nn	np	np	np	nn	nn	np	nn	nn	np	nn	nn	nn	nn	nn	nn	nn	nn	nn	np	nn	nn	nn	nn	nn	np	np	nn	np	nn	nn	nn	nn	nn	nn	nn	nn	np	np	nn	nn	np	nn	np	nn	np
Marker49357	<nnxnp>	np	nn	np	nn	nn	np	np	np	nn	np	np	nn	np	np	np	np	np	np	np	np	np	nn	np	np	np	np	np	nn	nn	np	nn	np	np	np	np	np	np	np	np	nn	nn	np	np	nn	np	nn	np	nn
Marker28887	<nnxnp>	nn	np	nn	np	np	nn	nn	nn	np	nn	nn	np	nn	nn	nn	nn	nn	nn	nn	nn	nn	np	nn	nn	nn	nn	nn	np	np	nn	np	nn	nn	nn	nn	nn	nn	nn	nn	np	np	nn	nn	np	nn	np	nn	np
Marker34707	<lmxll>	ll	lm	lm	ll	ll	lm	lm	lm	ll	lm	lm	lm	lm	ll	lm	lm	lm	lm	ll	lm	lm	lm	lm	lm	lm	ll	lm	lm	lm	ll	ll	lm	ll	ll	ll	lm	lm	lm	lm	lm	lm	lm	ll	ll	lm	lm	ll	ll
Marker9711	<lmxll>	lm	ll	ll	lm	lm	ll	ll	ll	lm	ll	ll	ll	ll	lm	ll	ll	ll	ll	lm	ll	ll	ll	ll	ll	ll	lm	ll	ll	ll	lm	lm	ll	lm	lm	lm	ll	ll	ll	ll	ll	ll	ll	ll	lm	ll	ll	lm	lm
Marker23499	<nnxnp>	np	np	np	nn	nn	nn	np	np	np	np	np	nn	np	np	np	np	np	np	np	np	np	nn	np	np	np	np	np	nn	nn	np	nn	np	nn	np	np	np	np	np	np	nn	nn	np	np	nn	np	nn	np	nn
Marker38934	<efxeg>	--	eg	eg	eg	ee	--	eg	--	eg	eg	eg	ee	eg	eg	eg	--	eg	eg	eg	eg	--	ee	eg	eg	eg	eg	eg	ee	ee	--	--	eg	eg	eg	eg	--	--	--	--	ee	--	eg	--	--	--	--	--	--
Marker36324	<nnxnp>	np	nn	np	nn	nn	nn	np	np	np	np	np	nn	np	np	np	np	np	np	np	np	np	nn	np	np	np	nn	np	nn	nn	np	nn	np	nn	np	np	np	np	np	np	nn	nn	np	np	nn	np	nn	np	nn
Marker3102	<efxeg>	ef	eg	ee	--	fg	eg	ee	ee	ef	ee	ee	eg	ee	ee	ee	ee	ee	ee	ee	ee	ee	eg	ee	ef	ee	ef	ee	--	eg	ef	--	ee	ef	--	ef	ee	ee	ee	eg	eg	--	ee	--	fg	ee	eg	ee	fg
Marker3732	<efxeg>	eg	ef	--	--	ee	ef	fg	fg	--	fg	fg	ef	--	fg	fg	--	fg	--	fg	fg	fg	ef	--	--	fg	ee	--	ef	ef	eg	--	--	eg	--	ee	--	fg	fg	--	--	ef	--	--	ee	--	ef	fg	ee
Marker2696	<nnxnp>	nn	np	nn	np	np	nn	nn	nn	np	nn	nn	np	nn	nn	nn	nn	nn	nn	nn	nn	nn	np	nn	nn	nn	np	nn	np	np	nn	np	nn	nn	nn	nn	nn	nn	nn	nn	np	np	nn	nn	np	nn	np	nn	np
Marker37322	<lmxll>	ll	lm	lm	ll	ll	lm	lm	lm	lm	lm	lm	lm	lm	lm	lm	lm	lm	lm	lm	lm	lm	lm	lm	lm	lm	ll	lm	lm	lm	ll	ll	lm	ll	ll	ll	lm	lm	lm	lm	lm	lm	lm	lm	ll	lm	lm	ll	ll
Marker17899	<lmxll>	lm	ll	ll	lm	lm	ll	ll	ll	ll	ll	ll	ll	ll	ll	ll	ll	ll	ll	ll	ll	ll	ll	ll	ll	ll	lm	ll	ll	ll	lm	lm	ll	lm	lm	lm	ll	ll	ll	ll	ll	ll	ll	ll	lm	ll	ll	lm	lm
Marker908	<lmxll>	ll	lm	lm	ll	ll	lm	lm	lm	lm	lm	lm	lm	lm	lm	lm	lm	lm	lm	lm	lm	lm	lm	lm	lm	lm	ll	lm	lm	lm	ll	ll	lm	ll	ll	ll	lm	lm	lm	lm	lm	lm	lm	lm	ll	lm	lm	lm	ll
Marker24513	<lmxll>	ll	lm	lm	ll	ll	lm	lm	lm	lm	lm	lm	lm	lm	lm	lm	lm	lm	lm	lm	lm	lm	lm	lm	lm	lm	ll	lm	lm	lm	ll	ll	lm	ll	ll	ll	lm	lm	lm	lm	lm	lm	lm	lm	ll	lm	lm	lm	ll
Marker30014	<lmxll>	lm	ll	ll	lm	lm	ll	ll	ll	ll	ll	ll	ll	ll	ll	ll	ll	ll	ll	ll	ll	ll	ll	ll	ll	ll	lm	ll	ll	ll	lm	lm	ll	lm	lm	lm	ll	ll	ll	ll	ll	ll	ll	ll	lm	ll	ll	ll	lm
Marker30034	<lmxll>	ll	lm	lm	ll	ll	lm	lm	lm	lm	lm	lm	lm	lm	lm	lm	lm	lm	lm	lm	lm	lm	lm	lm	lm	lm	ll	lm	lm	lm	ll	ll	lm	ll	ll	ll	lm	lm	lm	lm	lm	lm	lm	lm	ll	lm	lm	lm	ll
Marker30037	<abxcd>	ac	--	--	--	--	--	--	--	--	bc	bc	--	--	--	--	--	--	--	bc	bc	bc	--	bc	--	bc	--	bc	--	--	--	--	bc	--	ac	ac	--	--	--	--	--	--	--	--	--	--	--	--	--
Marker913	<lmxll>	lm	ll	ll	lm	lm	ll	ll	ll	ll	ll	ll	ll	ll	ll	ll	ll	ll	ll	ll	ll	ll	ll	ll	ll	ll	lm	ll	ll	ll	lm	lm	ll	lm	lm	lm	ll	ll	ll	ll	ll	ll	ll	ll	lm	ll	ll	ll	lm
Marker36314	<lmxll>	ll	lm	lm	ll	ll	lm	lm	lm	lm	lm	lm	lm	lm	lm	lm	lm	lm	lm	lm	lm	lm	lm	lm	lm	lm	ll	lm	lm	lm	ll	ll	lm	ll	ll	ll	lm	lm	lm	lm	lm	lm	lm	lm	ll	lm	lm	lm	ll
Marker36315	<nnxnp>	np	nn	np	nn	nn	np	np	np	nn	np	np	nn	np	np	np	np	np	np	np	np	np	nn	np	np	np	nn	np	nn	nn	nn	nn	np	np	np	np	nn	np	np	np	nn	nn	nn	np	nn	np	nn	np	nn
Marker38268	<lmxll>	ll	lm	lm	ll	ll	lm	lm	lm	lm	lm	lm	lm	lm	lm	lm	lm	lm	lm	lm	lm	lm	lm	lm	lm	lm	ll	lm	lm	lm	ll	ll	lm	ll	ll	ll	lm	lm	lm	lm	lm	lm	lm	lm	ll	lm	lm	lm	ll
Marker13022	<lmxll>	ll	lm	lm	ll	ll	lm	lm	lm	lm	lm	lm	lm	lm	lm	lm	lm	lm	lm	lm	lm	lm	lm	lm	lm	lm	ll	lm	lm	lm	ll	ll	lm	ll	ll	ll	lm	lm	lm	lm	lm	lm	lm	lm	ll	lm	lm	lm	ll
Marker19439	<lmxll>	lm	ll	ll	lm	lm	ll	ll	ll	lm	ll	ll	ll	ll	ll	ll	ll	ll	ll	ll	ll	ll	ll	ll	ll	ll	lm	ll	ll	ll	lm	lm	ll	lm	lm	lm	ll	ll	ll	ll	ll	ll	ll	ll	lm	ll	ll	lm	lm
Marker13749	<lmxll>	lm	ll	ll	lm	lm	ll	ll	ll	lm	ll	ll	ll	ll	ll	ll	ll	ll	ll	ll	ll	ll	ll	ll	ll	ll	lm	ll	ll	ll	lm	lm	ll	lm	lm	lm	ll	ll	ll	ll	ll	ll	ll	ll	lm	ll	ll	ll	lm
Marker2687	<lmxll>	lm	ll	ll	lm	lm	ll	ll	ll	lm	ll	ll	ll	ll	ll	ll	ll	ll	ll	ll	ll	ll	ll	ll	ll	ll	lm	ll	ll	ll	lm	lm	ll	lm	lm	lm	ll	ll	ll	ll	ll	ll	ll	ll	lm	ll	ll	ll	lm
Marker14120	<lmxll>	lm	ll	ll	lm	lm	ll	ll	ll	lm	ll	ll	ll	ll	ll	ll	ll	ll	ll	ll	ll	ll	ll	ll	ll	ll	lm	ll	ll	ll	lm	lm	ll	lm	lm	lm	ll	ll	ll	ll	ll	ll	ll	ll	lm	ll	ll	ll	lm
Marker13273	<lmxll>	lm	ll	ll	lm	lm	ll	ll	ll	lm	ll	ll	ll	ll	ll	ll	ll	ll	ll	ll	ll	ll	ll	ll	ll	ll	lm	ll	ll	ll	lm	lm	ll	lm	lm	lm	ll	ll	ll	ll	ll	ll	ll	ll	lm	ll	ll	lm	lm
Marker37257	<lmxll>	ll	lm	lm	ll	ll	lm	lm	lm	ll	lm	lm	lm	lm	lm	lm	lm	lm	lm	lm	lm	lm	lm	lm	lm	lm	ll	lm	lm	lm	ll	ll	lm	ll	ll	ll	lm	lm	lm	lm	lm	lm	lm	lm	ll	lm	lm	ll	ll
Marker14975	<lmxll>	ll	lm	lm	ll	ll	lm	lm	lm	ll	lm	lm	lm	lm	lm	lm	lm	lm	lm	lm	lm	lm	lm	lm	lm	lm	ll	lm	lm	lm	ll	ll	lm	ll	ll	ll	lm	lm	lm	lm	lm	lm	lm	lm	ll	lm	lm	lm	ll
Marker16709	<lmxll>	lm	ll	ll	lm	lm	ll	ll	ll	lm	ll	ll	ll	ll	ll	ll	ll	ll	ll	ll	ll	ll	ll	ll	ll	ll	lm	ll	ll	ll	lm	lm	ll	lm	lm	lm	ll	ll	ll	ll	ll	ll	ll	ll	lm	ll	ll	ll	lm
Marker36325	<lmxll>	ll	lm	lm	ll	ll	lm	lm	lm	ll	lm	lm	lm	lm	lm	lm	lm	lm	lm	lm	lm	lm	lm	lm	ll	lm	ll	lm	lm	lm	ll	ll	lm	ll	ll	ll	lm	lm	lm	lm	lm	lm	lm	lm	ll	lm	lm	lm	ll
Marker21334	<nnxnp>	np	nn	np	nn	nn	np	np	np	nn	np	np	nn	np	np	np	nn	nn	np	np	np	np	nn	np	np	np	nn	np	nn	nn	nn	nn	np	np	np	np	nn	np	nn	np	nn	nn	nn	np	nn	np	nn	np	nn
Marker14353	<nnxnp>	nn	np	nn	np	np	np	nn	nn	np	nn	nn	np	nn	nn	nn	np	np	nn	nn	nn	nn	np	nn	nn	nn	np	nn	np	np	np	np	nn	np	nn	nn	nn	nn	np	nn	np	np	np	np	np	nn	np	nn	np
Marker5143	<nnxnp>	nn	np	nn	np	np	np	nn	nn	np	nn	nn	np	nn	nn	nn	np	np	nn	nn	nn	nn	np	np	nn	nn	np	nn	np	np	np	np	nn	np	nn	nn	nn	nn	np	nn	np	np	np	np	np	nn	np	nn	np
Marker14346	<nnxnp>	np	nn	np	nn	nn	nn	np	np	nn	np	np	nn	np	np	np	nn	nn	np	np	np	np	nn	np	np	np	nn	np	nn	nn	nn	nn	np	nn	np	np	np	np	nn	np	nn	nn	nn	nn	nn	np	nn	np	nn
Marker48731	<nnxnp>	np	nn	np	nn	nn	nn	np	np	nn	np	np	nn	np	np	np	nn	nn	np	np	np	np	nn	np	np	np	nn	np	nn	nn	nn	nn	np	nn	np	np	np	np	nn	np	nn	nn	nn	nn	nn	np	nn	np	nn
Marker56257	<nnxnp>	np	nn	np	nn	nn	nn	np	np	nn	np	np	nn	np	np	np	nn	nn	np	np	np	np	nn	np	np	np	nn	np	nn	nn	nn	nn	np	nn	np	np	np	np	nn	np	nn	nn	nn	nn	nn	np	nn	np	nn
Marker46483	<nnxnp>	np	nn	np	nn	nn	nn	np	np	nn	np	np	nn	np	np	np	nn	nn	np	np	np	np	nn	np	np	np	nn	np	nn	nn	nn	nn	np	nn	np	np	np	np	nn	np	nn	nn	nn	nn	nn	np	nn	np	nn
Marker14344	<nnxnp>	nn	np	nn	np	np	np	nn	nn	np	nn	nn	np	nn	nn	nn	np	np	nn	nn	nn	nn	np	nn	nn	nn	np	nn	np	np	np	np	nn	np	nn	nn	nn	nn	np	np	np	np	np	np	np	nn	np	nn	np
Marker8164	<nnxnp>	np	nn	np	nn	nn	nn	np	np	nn	np	np	nn	np	np	np	nn	nn	np	np	np	np	nn	np	np	np	nn	np	nn	nn	nn	nn	np	nn	np	np	np	np	nn	nn	nn	nn	nn	nn	nn	np	nn	np	nn
Marker19150	<nnxnp>	nn	np	nn	np	np	np	nn	nn	np	nn	nn	np	nn	nn	nn	np	np	nn	nn	nn	nn	np	nn	nn	nn	np	nn	np	np	np	np	nn	np	nn	nn	nn	nn	np	np	np	np	np	np	np	nn	np	nn	np
Marker13760	<nnxnp>	nn	np	nn	np	np	np	nn	nn	np	nn	nn	np	nn	nn	nn	np	np	nn	nn	nn	nn	np	nn	nn	nn	np	nn	np	np	np	np	nn	np	nn	nn	nn	nn	np	np	np	np	np	np	np	nn	np	nn	np
Marker64630	<nnxnp>	np	nn	np	nn	nn	nn	np	np	nn	np	np	nn	np	np	np	nn	nn	np	np	np	np	nn	np	np	np	nn	np	nn	nn	nn	nn	np	nn	np	np	np	np	nn	nn	nn	nn	nn	nn	nn	np	nn	np	nn
Marker25552	<nnxnp>	nn	np	nn	np	np	np	nn	nn	np	nn	nn	np	nn	nn	nn	np	np	nn	nn	nn	nn	np	np	nn	nn	np	nn	np	np	np	np	nn	np	nn	np	nn	nn	np	nn	np	np	np	np	np	nn	np	nn	np
Marker10748	<nnxnp>	nn	np	nn	np	np	np	nn	nn	np	nn	nn	np	nn	nn	nn	np	np	nn	nn	nn	nn	np	np	nn	nn	np	nn	np	np	np	np	nn	np	nn	np	nn	nn	np	nn	np	np	np	np	np	nn	np	nn	np
Marker5144	<nnxnp>	nn	np	nn	np	np	np	nn	nn	np	nn	nn	np	nn	nn	nn	np	np	nn	nn	nn	nn	np	np	nn	nn	np	nn	np	np	np	np	nn	np	nn	np	nn	nn	np	nn	np	np	np	np	np	nn	np	nn	np
Marker10707	<nnxnp>	nn	np	nn	np	np	np	nn	nn	np	nn	nn	np	nn	nn	nn	np	np	nn	nn	nn	nn	np	nn	nn	nn	np	nn	np	np	np	np	nn	np	nn	nn	nn	nn	np	np	np	np	np	np	np	nn	np	np	np
Marker43494	<efxeg>	--	ef	fg	ee	ee	ef	fg	fg	ef	fg	fg	ef	fg	--	fg	ee	ef	--	fg	--	--	ef	fg	--	--	ee	fg	ef	--	ee	--	--	ee	--	--	--	fg	ef	--	ee	--	ef	eg	--	--	ee	fg	ee
Marker43500	<nnxnp>	np	nn	np	nn	nn	nn	np	np	nn	np	np	nn	np	np	np	nn	nn	np	np	np	np	nn	np	np	np	nn	np	nn	nn	nn	nn	np	nn	np	np	np	np	nn	nn	nn	nn	nn	np	nn	nn	nn	np	nn
Marker10711	<nnxnp>	np	nn	np	nn	nn	np	np	np	nn	np	nn	nn	np	np	np	nn	nn	np	np	np	np	nn	np	np	np	nn	np	nn	nn	nn	nn	np	nn	np	np	np	np	nn	nn	nn	nn	nn	np	nn	nn	nn	np	nn
Marker9196	<lmxll>	lm	ll	lm	lm	ll	lm	ll	ll	lm	lm	lm	lm	ll	ll	lm	ll	ll	ll	ll	ll	ll	ll	ll	lm	lm	ll	ll	lm	ll	lm	lm	ll	ll	ll	ll	ll	ll	ll	lm	ll	ll	ll	ll	ll	ll	lm	ll	ll
Marker23313	<lmxll>	lm	ll	lm	lm	ll	lm	ll	ll	lm	lm	lm	lm	ll	ll	lm	ll	ll	ll	ll	ll	ll	ll	ll	lm	lm	ll	ll	lm	ll	lm	lm	ll	ll	ll	ll	ll	ll	ll	lm	ll	ll	ll	ll	ll	ll	lm	ll	ll
Marker32933	<lmxll>	lm	ll	lm	lm	ll	lm	ll	ll	lm	lm	lm	lm	ll	ll	lm	ll	ll	ll	ll	ll	ll	ll	ll	lm	lm	ll	ll	lm	ll	lm	lm	ll	ll	ll	ll	ll	ll	ll	lm	ll	ll	ll	ll	ll	ll	lm	ll	lm
Marker35598	<lmxll>	lm	ll	lm	lm	ll	lm	ll	ll	lm	lm	lm	lm	ll	ll	lm	ll	ll	ll	ll	ll	ll	ll	ll	lm	lm	ll	ll	lm	ll	lm	lm	ll	ll	ll	ll	ll	ll	ll	lm	ll	ll	ll	ll	ll	ll	lm	ll	ll
Marker26061	<lmxll>	lm	ll	lm	lm	ll	lm	ll	ll	lm	lm	lm	lm	ll	ll	lm	ll	ll	ll	ll	ll	ll	ll	ll	lm	lm	ll	ll	lm	ll	lm	lm	ll	ll	ll	ll	ll	ll	ll	lm	ll	ll	ll	ll	ll	ll	lm	ll	ll
Marker37428	<efxeg>	ef	ee	ef	ef	ee	--	--	--	ee	ef	ef	--	ee	ee	ef	ee	ee	--	ee	ee	ee	ee	ee	ee	ef	ee	--	--	--	ee	--	ee	--	ef	ef	--	--	--	--	--	ee	--	--	--	ee	--	--	--
Marker1385	<lmxll>	lm	ll	lm	lm	ll	lm	ll	ll	lm	lm	lm	lm	ll	ll	lm	ll	ll	ll	ll	ll	ll	ll	ll	lm	lm	ll	ll	lm	ll	ll	lm	ll	ll	ll	lm	ll	ll	ll	lm	ll	ll	lm	ll	ll	ll	lm	ll	lm
Marker25658	<lmxll>	lm	ll	lm	lm	ll	lm	ll	ll	lm	lm	lm	lm	ll	ll	lm	ll	ll	ll	ll	ll	ll	ll	ll	lm	lm	ll	ll	lm	ll	lm	lm	ll	ll	ll	ll	ll	ll	ll	lm	ll	ll	ll	lm	ll	ll	lm	ll	ll
Marker1196	<lmxll>	ll	lm	ll	ll	lm	ll	lm	lm	ll	ll	ll	ll	lm	lm	ll	lm	lm	lm	lm	lm	lm	lm	lm	ll	ll	lm	lm	ll	lm	ll	ll	lm	lm	lm	lm	ll	lm	lm	ll	lm	lm	lm	ll	lm	ll	ll	lm	lm
Marker11028	<lmxll>	lm	ll	lm	lm	ll	lm	lm	ll	lm	lm	lm	lm	ll	ll	lm	ll	ll	ll	ll	ll	ll	ll	ll	lm	lm	ll	ll	lm	ll	ll	lm	ll	ll	lm	lm	ll	ll	ll	lm	lm	ll	lm	ll	lm	ll	lm	ll	lm
Marker17838	<lmxll>	ll	lm	ll	ll	lm	ll	lm	lm	lm	ll	ll	ll	lm	lm	ll	lm	lm	lm	lm	lm	lm	lm	lm	ll	ll	ll	lm	ll	lm	ll	ll	lm	lm	lm	lm	ll	lm	lm	ll	lm	ll	lm	ll	lm	ll	ll	lm	lm
Marker21531	<lmxll>	lm	ll	lm	lm	ll	ll	ll	ll	ll	lm	lm	lm	ll	ll	lm	ll	ll	ll	ll	ll	ll	ll	ll	lm	lm	lm	ll	lm	ll	lm	lm	ll	ll	ll	ll	lm	ll	ll	lm	ll	lm	ll	lm	ll	lm	lm	ll	ll
Marker14237	<lmxll>	ll	lm	ll	ll	lm	lm	lm	lm	lm	ll	ll	ll	lm	lm	ll	lm	lm	lm	lm	lm	lm	lm	lm	ll	ll	ll	lm	ll	lm	ll	ll	lm	lm	ll	lm	ll	lm	lm	ll	lm	ll	lm	ll	lm	ll	ll	lm	lm
Marker25197	<lmxll>	ll	lm	ll	ll	lm	lm	lm	ll	lm	ll	ll	ll	lm	lm	ll	lm	lm	lm	lm	lm	lm	lm	lm	ll	ll	ll	lm	ll	lm	ll	ll	lm	lm	ll	ll	ll	lm	lm	ll	lm	ll	lm	ll	lm	ll	ll	ll	lm
Marker14918	<lmxll>	lm	ll	lm	lm	ll	ll	ll	lm	ll	lm	lm	lm	ll	ll	lm	ll	ll	ll	ll	ll	ll	ll	ll	lm	lm	lm	ll	lm	ll	lm	lm	ll	ll	lm	lm	lm	ll	ll	lm	ll	lm	ll	lm	ll	lm	lm	lm	ll
Marker15925	<lmxll>	lm	ll	lm	lm	ll	ll	ll	lm	lm	lm	lm	lm	ll	ll	ll	ll	ll	ll	ll	ll	ll	ll	ll	lm	lm	lm	ll	lm	ll	lm	lm	ll	ll	lm	lm	lm	ll	ll	lm	ll	lm	ll	lm	lm	lm	lm	lm	ll
Marker8981	<lmxll>	ll	lm	ll	ll	lm	lm	lm	ll	ll	ll	ll	ll	lm	lm	lm	lm	lm	lm	lm	lm	lm	lm	lm	ll	ll	ll	lm	ll	lm	ll	ll	lm	lm	ll	ll	ll	lm	lm	ll	lm	ll	lm	ll	ll	ll	ll	ll	lm
Marker16697	<lmxll>	ll	lm	ll	ll	lm	lm	lm	ll	ll	ll	ll	ll	lm	lm	lm	lm	lm	lm	lm	lm	lm	lm	lm	ll	ll	ll	lm	ll	lm	ll	ll	lm	lm	ll	ll	ll	lm	lm	ll	lm	ll	lm	ll	ll	ll	ll	ll	lm
Marker18317	<lmxll>	ll	lm	ll	ll	lm	lm	lm	ll	ll	ll	ll	ll	lm	lm	ll	lm	lm	lm	lm	lm	lm	lm	lm	ll	ll	ll	lm	ll	lm	ll	lm	lm	lm	ll	ll	ll	lm	lm	ll	lm	ll	lm	ll	ll	ll	ll	lm	lm
Marker9745	<lmxll>	ll	lm	ll	ll	lm	lm	lm	ll	ll	ll	ll	ll	lm	lm	ll	lm	lm	lm	lm	lm	lm	lm	lm	ll	ll	ll	lm	ll	lm	ll	lm	lm	lm	ll	ll	ll	lm	lm	ll	lm	ll	lm	ll	ll	ll	ll	lm	lm
Marker9150	<lmxll>	ll	lm	ll	ll	lm	lm	lm	ll	ll	ll	ll	ll	lm	lm	lm	lm	lm	lm	lm	lm	lm	lm	lm	ll	ll	ll	lm	ll	lm	ll	ll	lm	lm	ll	ll	ll	lm	ll	ll	lm	ll	lm	ll	ll	ll	ll	lm	lm
Marker32887	<lmxll>	ll	lm	ll	ll	lm	lm	lm	ll	ll	ll	ll	ll	lm	lm	lm	lm	lm	lm	lm	lm	lm	lm	lm	ll	ll	ll	lm	ll	lm	ll	ll	lm	lm	ll	ll	ll	lm	ll	ll	lm	ll	lm	ll	ll	ll	ll	lm	lm
Marker9616	<lmxll>	ll	lm	ll	ll	lm	lm	lm	ll	ll	ll	ll	ll	lm	lm	ll	lm	lm	lm	lm	lm	lm	lm	lm	lm	ll	ll	lm	ll	lm	ll	ll	lm	lm	ll	ll	ll	lm	ll	ll	lm	ll	ll	ll	ll	ll	ll	lm	lm
Marker9882	<lmxll>	ll	lm	ll	ll	lm	lm	lm	ll	ll	ll	ll	ll	lm	lm	ll	lm	lm	lm	lm	lm	lm	lm	lm	lm	ll	ll	lm	ll	lm	ll	ll	lm	lm	ll	ll	ll	lm	ll	ll	lm	ll	ll	ll	ll	ll	ll	lm	lm
Marker41086	<lmxll>	lm	ll	lm	lm	ll	ll	ll	lm	lm	lm	lm	lm	ll	ll	lm	ll	lm	ll	ll	ll	lm	ll	ll	lm	lm	lm	ll	lm	ll	lm	lm	ll	ll	lm	lm	lm	ll	lm	lm	ll	lm	lm	lm	lm	lm	lm	ll	ll
Marker9684	<lmxll>	ll	lm	ll	ll	lm	lm	lm	ll	ll	ll	ll	ll	lm	lm	ll	lm	ll	lm	lm	lm	lm	lm	lm	ll	ll	ll	lm	ll	lm	ll	ll	lm	lm	ll	ll	ll	lm	ll	ll	ll	ll	ll	ll	ll	ll	ll	lm	lm
Marker32081	<lmxll>	lm	ll	lm	lm	ll	ll	ll	lm	lm	lm	lm	lm	ll	ll	lm	ll	ll	ll	ll	ll	ll	ll	ll	lm	lm	lm	ll	lm	ll	lm	lm	ll	ll	lm	lm	lm	ll	ll	lm	lm	lm	lm	lm	lm	lm	lm	ll	ll
Marker1229	<lmxll>	lm	ll	lm	lm	ll	ll	ll	lm	lm	lm	lm	lm	ll	ll	lm	ll	ll	ll	ll	ll	ll	ll	ll	lm	lm	lm	ll	lm	ll	lm	lm	ll	ll	lm	lm	lm	ll	ll	lm	lm	lm	lm	lm	lm	lm	lm	ll	ll
Marker9076	<lmxll>	lm	ll	lm	lm	ll	lm	ll	lm	lm	lm	lm	lm	ll	ll	lm	ll	ll	ll	ll	ll	ll	ll	ll	lm	lm	lm	ll	lm	ll	lm	ll	ll	ll	lm	lm	lm	ll	ll	lm	ll	lm	ll	lm	lm	lm	lm	ll	lm
Marker9681	<lmxll>	lm	ll	lm	lm	ll	lm	ll	lm	lm	lm	lm	lm	ll	ll	lm	ll	ll	ll	ll	ll	ll	ll	ll	lm	lm	lm	ll	lm	ll	lm	ll	ll	ll	lm	lm	lm	ll	ll	ll	ll	lm	ll	lm	lm	lm	lm	ll	lm
Marker27517	<lmxll>	lm	ll	lm	lm	ll	lm	ll	lm	lm	lm	lm	lm	ll	ll	lm	ll	ll	ll	ll	ll	ll	ll	ll	lm	lm	lm	ll	lm	ll	lm	ll	ll	ll	lm	lm	lm	ll	ll	ll	ll	lm	lm	lm	lm	lm	lm	ll	lm
Marker42909	<lmxll>	lm	ll	lm	lm	ll	lm	ll	lm	lm	lm	lm	lm	ll	ll	lm	ll	ll	lm	ll	ll	ll	ll	ll	lm	lm	lm	ll	lm	ll	lm	ll	ll	ll	lm	lm	lm	ll	ll	ll	ll	lm	lm	lm	lm	lm	lm	ll	lm
Marker38815	<nnxnp>	np	nn	nn	np	np	np	nn	nn	np	np	nn	nn	nn	nn	nn	np	nn	nn	nn	np	nn	np	nn	nn	np	np	nn	nn	nn	np	nn	nn	np	nn	np	nn	np	nn	np	nn	nn	np	nn	nn	nn	np	np	np
Marker29978	<nnxnp>	nn	np	np	nn	nn	nn	np	np	nn	nn	np	np	np	np	np	nn	np	np	np	nn	np	nn	np	np	nn	nn	np	np	np	nn	np	np	nn	np	nn	np	nn	np	nn	np	np	nn	np	np	np	nn	nn	nn
Marker43997	<lmxll>	lm	ll	lm	lm	ll	lm	ll	lm	lm	lm	lm	lm	ll	ll	lm	ll	ll	lm	ll	ll	ll	ll	ll	lm	lm	lm	ll	lm	ll	lm	ll	ll	ll	lm	lm	lm	ll	ll	ll	ll	lm	lm	lm	lm	lm	lm	ll	ll
Marker20883	<lmxll>	lm	ll	lm	lm	ll	lm	ll	lm	lm	lm	lm	lm	ll	ll	lm	ll	ll	lm	ll	ll	ll	ll	ll	lm	lm	lm	ll	lm	ll	lm	ll	ll	ll	lm	lm	lm	ll	ll	ll	ll	lm	lm	lm	lm	lm	lm	ll	ll
Marker40277	<lmxll>	lm	ll	lm	lm	ll	ll	ll	lm	lm	lm	lm	ll	ll	ll	lm	ll	ll	lm	ll	ll	ll	ll	ll	lm	lm	lm	ll	lm	ll	lm	lm	ll	ll	lm	lm	lm	ll	ll	ll	ll	lm	lm	lm	lm	lm	lm	ll	ll
Marker2097	<lmxll>	ll	lm	ll	ll	lm	lm	lm	ll	ll	ll	ll	lm	lm	lm	ll	lm	lm	ll	lm	lm	lm	lm	lm	ll	ll	ll	lm	ll	lm	ll	lm	lm	lm	ll	ll	ll	lm	lm	lm	lm	ll	ll	ll	ll	ll	ll	lm	lm
Marker17756	<lmxll>	ll	lm	ll	ll	lm	lm	lm	ll	ll	ll	ll	lm	lm	lm	ll	lm	lm	ll	lm	lm	lm	lm	lm	ll	ll	ll	lm	ll	lm	ll	lm	lm	lm	ll	ll	ll	lm	lm	lm	lm	ll	ll	ll	ll	ll	ll	lm	lm
Marker43353	<lmxll>	ll	lm	ll	ll	lm	lm	lm	ll	ll	ll	ll	lm	lm	lm	ll	lm	lm	ll	lm	lm	lm	lm	lm	ll	ll	ll	lm	ll	lm	ll	lm	lm	lm	ll	ll	ll	lm	lm	lm	lm	ll	ll	ll	ll	ll	ll	lm	lm
Marker17947	<lmxll>	ll	lm	ll	ll	lm	lm	lm	ll	ll	ll	ll	lm	lm	lm	ll	lm	lm	ll	lm	lm	lm	lm	lm	ll	ll	ll	lm	ll	lm	ll	ll	lm	lm	ll	ll	ll	lm	lm	ll	lm	ll	ll	ll	ll	ll	ll	lm	lm
Marker29271	<lmxll>	lm	ll	lm	lm	ll	ll	ll	lm	lm	lm	lm	ll	ll	ll	lm	ll	ll	lm	ll	ll	ll	ll	ll	lm	lm	lm	ll	lm	ll	lm	lm	ll	ll	lm	lm	lm	ll	ll	lm	ll	lm	lm	lm	lm	lm	lm	ll	ll
Marker29969	<lmxll>	ll	lm	ll	ll	lm	ll	ll	ll	ll	ll	ll	ll	ll	lm	ll	lm	lm	lm	lm	lm	lm	lm	lm	ll	ll	ll	lm	ll	lm	ll	lm	lm	lm	ll	ll	ll	lm	lm	lm	lm	ll	lm	ll	ll	ll	ll	lm	ll
Marker29968	<lmxll>	ll	lm	ll	ll	lm	ll	ll	ll	ll	ll	ll	ll	ll	lm	ll	lm	lm	lm	lm	lm	lm	lm	lm	ll	ll	ll	lm	ll	lm	ll	lm	lm	lm	ll	ll	ll	lm	lm	lm	lm	ll	lm	ll	ll	ll	ll	lm	ll
Marker3993	<efxeg>	--	ef	ee	ee	--	--	--	ee	--	ee	--	--	ef	ef	--	ee	ee	ef	ef	ef	ee	ef	ef	ee	--	ee	ee	--	ef	--	--	--	--	--	--	ee	--	--	ee	ee	--	ee	ee	--	--	--	--	--
Marker11105	<abxcd>	bc	ad	bd	bd	--	ac	ad	--	--	bc	bd	ad	ad	ad	--	--	ad	bd	ad	--	--	ac	ad	--	bc	--	--	--	--	--	--	--	ad	--	--	--	--	--	--	--	--	--	bc	--	--	--	ac	--
Marker29967	<nnxnp>	nn	np	np	np	np	nn	np	np	nn	nn	np	np	np	np	np	np	np	np	np	nn	np	nn	np	np	nn	np	np	np	np	nn	np	np	np	np	nn	np	np	np	nn	np	np	nn	np	np	np	nn	nn	nn
Marker17704	<lmxll>	lm	ll	lm	ll	ll	lm	lm	lm	lm	ll	lm	ll	ll	ll	lm	lm	lm	lm	ll	ll	lm	lm	lm	lm	lm	lm	ll	lm	ll	lm	lm	ll	ll	lm	lm	ll	lm	lm	lm	ll	lm	lm	lm	lm	lm	lm	lm	lm
Marker9174	<lmxll>	ll	lm	ll	lm	lm	ll	ll	ll	ll	lm	ll	lm	lm	lm	ll	ll	ll	ll	lm	lm	ll	ll	ll	ll	ll	ll	lm	ll	lm	ll	ll	lm	lm	ll	ll	lm	ll	ll	ll	lm	ll	ll	ll	ll	ll	ll	ll	ll
Marker9159	<lmxll>	lm	ll	lm	ll	ll	ll	lm	lm	lm	lm	lm	ll	ll	ll	lm	ll	lm	lm	ll	ll	ll	ll	ll	lm	lm	lm	ll	lm	ll	lm	lm	ll	ll	lm	lm	ll	ll	ll	lm	ll	lm	lm	lm	lm	lm	lm	ll	lm
Marker10629	<lmxll>	ll	lm	ll	lm	lm	ll	ll	ll	ll	ll	ll	lm	lm	lm	ll	lm	ll	ll	lm	lm	lm	lm	lm	ll	ll	ll	lm	ll	lm	ll	ll	lm	lm	ll	ll	lm	lm	lm	ll	lm	ll	ll	ll	ll	ll	ll	lm	ll
Marker10627	<lmxll>	lm	ll	lm	ll	ll	lm	lm	lm	lm	lm	lm	ll	ll	ll	lm	ll	lm	lm	ll	ll	ll	ll	ll	lm	lm	lm	ll	lm	ll	lm	lm	ll	ll	lm	lm	ll	ll	ll	lm	ll	lm	lm	lm	lm	lm	lm	ll	lm
Marker37730	<lmxll>	ll	lm	ll	lm	lm	ll	ll	ll	ll	ll	ll	lm	lm	lm	ll	lm	ll	ll	lm	lm	lm	lm	lm	ll	ll	ll	lm	ll	lm	ll	ll	lm	lm	ll	ll	lm	lm	lm	ll	lm	ll	ll	ll	ll	ll	ll	lm	ll
Marker7385	<efxeg>	ee	ef	ee	ef	ef	--	ee	--	eg	eg	ee	ef	ef	ef	ee	ee	ee	ee	ef	ef	ef	--	ef	ee	eg	ee	ee	ee	ef	eg	ee	ef	ef	eg	ee	ef	ef	ef	ee	--	ee	eg	eg	ee	--	--	--	--
Marker23905	<nnxnp>	nn	np	np	np	np	nn	np	np	nn	nn	np	np	np	np	np	np	np	np	np	nn	np	nn	np	np	nn	np	np	np	np	nn	np	np	np	nn	nn	np	np	np	nn	np	np	nn	nn	np	nn	nn	nn	nn
Marker30445	<lmxll>	ll	lm	ll	lm	lm	ll	ll	ll	ll	ll	ll	lm	lm	lm	ll	ll	ll	ll	lm	lm	ll	lm	lm	ll	ll	ll	lm	ll	lm	ll	ll	lm	lm	ll	ll	lm	lm	lm	ll	lm	ll	ll	ll	ll	ll	ll	ll	ll
Marker4042	<abxcd>	--	ad	bd	ad	ad	--	bd	--	--	bc	bd	ad	ad	ad	bd	bd	bd	bd	ad	ad	bd	ac	ad	--	bc	bd	ad	bd	ad	--	--	ad	ad	bc	bd	--	ad	--	--	--	--	--	--	--	--	--	--	--
Marker30443	<lmxll>	ll	lm	ll	lm	lm	ll	ll	ll	lm	ll	ll	lm	lm	lm	ll	ll	ll	ll	lm	lm	ll	lm	lm	ll	ll	ll	lm	ll	lm	ll	ll	lm	lm	ll	ll	lm	ll	ll	ll	lm	ll	ll	ll	ll	ll	ll	ll	ll
Marker2264	<nnxnp>	nn	np	np	np	np	nn	np	np	nn	nn	np	np	np	np	np	np	np	np	np	np	np	nn	np	np	nn	np	np	np	np	nn	np	np	np	nn	nn	np	np	np	nn	np	np	nn	nn	np	nn	nn	nn	nn
Marker12401	<nnxnp>	nn	np	np	np	np	nn	np	np	nn	nn	np	np	np	np	np	np	np	np	np	np	np	nn	np	np	nn	np	np	np	np	nn	np	np	np	nn	nn	np	np	np	nn	np	np	nn	nn	np	nn	nn	nn	nn
Marker11	<nnxnp>	nn	np	np	np	np	nn	np	np	nn	nn	np	np	np	np	np	np	np	np	np	np	np	nn	np	np	nn	np	np	np	np	nn	np	np	np	nn	nn	np	np	np	nn	np	np	nn	nn	np	nn	nn	nn	nn
Marker426	<nnxnp>	nn	np	np	np	np	nn	np	np	nn	nn	np	np	np	np	np	np	np	np	np	np	np	nn	np	np	nn	np	np	np	np	nn	np	np	np	nn	nn	np	np	np	nn	np	np	nn	nn	np	nn	nn	nn	nn
Marker18837	<nnxnp>	nn	np	np	np	np	nn	np	np	nn	nn	np	np	np	np	np	np	np	np	np	np	np	nn	np	np	nn	np	np	np	np	nn	np	np	np	nn	nn	np	np	np	nn	np	np	nn	nn	np	nn	nn	nn	nn
Marker48911	<nnxnp>	np	nn	nn	nn	nn	np	nn	nn	np	np	nn	nn	nn	nn	nn	nn	nn	nn	nn	nn	nn	np	nn	nn	np	nn	nn	nn	nn	np	nn	nn	nn	np	np	nn	nn	nn	np	nn	nn	np	np	nn	np	np	np	np
Marker459	<nnxnp>	nn	np	np	np	np	nn	np	np	nn	nn	np	np	np	np	np	np	np	np	np	np	np	nn	np	np	nn	np	np	np	np	nn	np	np	np	nn	nn	np	np	np	nn	np	np	nn	nn	np	nn	nn	nn	nn
Marker29316	<nnxnp>	nn	np	np	np	np	nn	np	np	nn	nn	np	np	np	np	np	np	np	np	np	np	np	nn	np	np	nn	np	np	np	np	nn	np	np	np	nn	nn	np	np	np	nn	np	np	nn	nn	np	nn	nn	nn	nn
Marker22077	<nnxnp>	nn	np	np	np	np	nn	np	np	nn	nn	np	np	np	np	np	np	np	np	np	np	np	nn	np	np	nn	np	np	np	np	nn	np	np	np	nn	nn	np	np	np	nn	np	np	nn	nn	np	nn	nn	nn	nn
Marker9130	<nnxnp>	nn	np	np	np	np	nn	np	np	nn	nn	np	np	np	np	np	np	np	np	np	np	np	nn	np	np	nn	np	np	np	np	nn	np	np	np	nn	nn	np	np	np	nn	np	np	nn	nn	np	nn	nn	nn	nn
Marker26206	<nnxnp>	np	nn	nn	nn	nn	np	nn	nn	np	np	nn	nn	nn	nn	nn	nn	nn	nn	nn	nn	nn	np	nn	nn	np	nn	nn	nn	nn	np	nn	nn	nn	np	np	nn	nn	nn	nn	nn	nn	np	np	nn	np	np	np	np
Marker45607	<nnxnp>	np	nn	nn	nn	nn	np	nn	nn	np	np	nn	nn	nn	nn	nn	nn	nn	nn	nn	nn	nn	np	nn	nn	np	nn	nn	nn	nn	np	nn	nn	nn	np	np	nn	nn	nn	nn	nn	nn	np	np	nn	np	np	np	np
Marker49543	<nnxnp>	np	nn	nn	nn	nn	np	nn	nn	np	np	nn	nn	nn	nn	nn	nn	nn	nn	nn	nn	nn	np	nn	nn	np	nn	nn	nn	nn	np	nn	nn	nn	np	np	nn	nn	nn	nn	nn	nn	np	np	nn	np	np	np	np
Marker14371	<lmxll>	lm	lm	lm	lm	lm	lm	lm	ll	ll	lm	lm	ll	ll	ll	lm	lm	lm	lm	ll	ll	lm	ll	lm	lm	lm	ll	ll	lm	ll	ll	lm	ll	ll	lm	lm	ll	ll	ll	lm	lm	ll	lm	ll	lm	ll	lm	lm	lm
Marker10790	<lmxll>	lm	lm	lm	lm	lm	lm	lm	ll	ll	lm	lm	ll	lm	ll	lm	lm	lm	lm	ll	ll	lm	ll	lm	lm	lm	ll	ll	lm	ll	ll	lm	ll	ll	lm	lm	ll	ll	ll	lm	lm	ll	lm	ll	lm	ll	lm	lm	lm
Marker48377	<nnxnp>	nn	nn	nn	nn	nn	np	nn	nn	np	np	nn	nn	nn	nn	nn	np	nn	nn	nn	nn	nn	np	nn	nn	np	nn	nn	nn	nn	np	np	nn	nn	np	nn	nn	nn	nn	np	np	nn	np	np	nn	np	np	np	np
Marker37407	<nnxnp>	np	np	np	np	np	nn	np	np	nn	nn	np	np	np	np	np	nn	np	np	np	np	np	nn	np	np	nn	np	np	np	np	nn	nn	np	np	nn	np	np	np	np	nn	nn	np	nn	nn	np	nn	nn	nn	nn
Marker22794	<efxeg>	fg	fg	fg	eg	fg	--	fg	fg	--	ef	fg	eg	fg	eg	fg	--	fg	fg	eg	eg	fg	--	fg	fg	ef	eg	ee	fg	eg	ef	--	eg	eg	ee	--	eg	eg	eg	--	ef	--	ef	ee	--	ee	ef	--	--
Marker16022	<nnxnp>	np	np	np	np	np	nn	np	np	nn	nn	np	np	np	np	np	nn	np	np	np	np	np	nn	np	nn	nn	np	np	np	np	nn	nn	np	np	nn	np	np	np	np	nn	nn	np	nn	nn	np	nn	nn	nn	nn
Marker24049	<efxeg>	eg	eg	--	fg	eg	ee	eg	eg	--	ee	eg	fg	eg	fg	eg	ee	eg	eg	fg	fg	eg	ef	eg	--	--	--	--	eg	fg	ee	--	fg	fg	ee	--	fg	fg	fg	ee	ee	--	ee	ef	--	ef	ee	ee	ee
Marker41767	<lmxll>	lm	lm	lm	lm	lm	lm	lm	lm	ll	lm	lm	ll	lm	ll	lm	lm	lm	lm	ll	ll	lm	ll	lm	lm	lm	ll	ll	lm	ll	lm	lm	ll	ll	lm	lm	ll	ll	ll	lm	lm	lm	lm	ll	lm	ll	lm	lm	lm
Marker37405	<lmxll>	lm	lm	lm	ll	lm	lm	lm	lm	lm	lm	lm	ll	lm	ll	lm	lm	lm	lm	ll	ll	lm	ll	lm	lm	lm	ll	ll	lm	ll	lm	lm	ll	ll	lm	lm	ll	ll	ll	lm	lm	lm	lm	ll	lm	ll	lm	lm	lm
Marker30721	<lmxll>	ll	ll	ll	lm	ll	ll	ll	ll	ll	ll	ll	lm	ll	lm	ll	ll	ll	ll	lm	lm	ll	lm	ll	ll	ll	lm	lm	ll	lm	ll	ll	lm	lm	ll	ll	lm	lm	lm	ll	ll	ll	ll	lm	ll	lm	ll	ll	ll
Marker37390	<lmxll>	ll	ll	ll	lm	ll	ll	ll	ll	ll	ll	ll	lm	ll	lm	ll	ll	ll	ll	lm	lm	ll	lm	ll	ll	ll	lm	lm	ll	lm	ll	ll	lm	lm	ll	ll	lm	lm	lm	ll	ll	ll	ll	lm	ll	lm	ll	ll	ll
Marker58117	<nnxnp>	np	np	nn	np	np	nn	np	np	nn	nn	np	np	nn	nn	np	np	np	np	np	np	np	nn	np	np	nn	np	np	np	np	nn	np	np	np	nn	np	nn	np	nn	nn	nn	np	nn	nn	np	nn	nn	nn	np
Marker30719	<lmxll>	ll	ll	ll	lm	ll	ll	ll	ll	ll	ll	ll	lm	ll	lm	ll	ll	ll	ll	lm	lm	ll	lm	ll	ll	ll	lm	ll	ll	lm	ll	ll	lm	lm	lm	ll	lm	lm	lm	ll	ll	ll	ll	lm	ll	lm	ll	ll	ll
Marker4826	<nnxnp>	nn	nn	np	nn	nn	np	nn	nn	np	np	nn	nn	np	np	nn	nn	nn	nn	nn	nn	nn	np	nn	nn	np	nn	nn	nn	nn	np	nn	nn	nn	np	nn	np	nn	np	np	np	nn	np	np	nn	np	np	np	nn
Marker25713	<nnxnp>	nn	nn	np	nn	nn	np	nn	nn	np	np	nn	nn	np	np	nn	nn	nn	nn	nn	nn	nn	np	nn	nn	nn	nn	nn	nn	nn	np	nn	nn	nn	np	nn	np	nn	np	np	np	nn	np	np	nn	np	np	np	nn
Marker61523	<nnxnp>	nn	nn	np	nn	nn	np	nn	nn	np	np	nn	nn	np	np	nn	nn	nn	nn	nn	nn	nn	np	nn	nn	nn	nn	nn	nn	nn	np	nn	nn	nn	np	nn	np	nn	np	np	np	nn	np	np	nn	np	np	np	nn
Marker2124	<nnxnp>	np	np	nn	np	np	nn	np	np	nn	nn	np	np	nn	nn	np	np	np	np	np	np	np	nn	np	np	np	np	np	np	np	nn	np	np	np	nn	np	nn	np	nn	nn	nn	np	nn	nn	np	nn	nn	nn	np
Marker4822	<efxeg>	ee	--	eg	ee	--	eg	--	--	eg	eg	--	--	eg	eg	--	--	--	--	--	--	--	eg	--	--	--	ee	--	--	--	eg	--	--	--	eg	ee	--	ee	eg	eg	eg	--	--	eg	--	eg	--	--	ee
Marker19930	<nnxnp>	nn	nn	np	nn	nn	np	nn	nn	np	np	nn	nn	np	np	nn	nn	nn	nn	nn	nn	nn	np	nn	nn	nn	nn	nn	nn	nn	np	nn	nn	nn	np	nn	np	nn	np	np	np	nn	np	np	nn	np	np	np	nn
Marker26545	<lmxll>	lm	ll	ll	lm	ll	lm	lm	ll	ll	ll	ll	lm	lm	lm	ll	lm	ll	ll	ll	ll	ll	lm	ll	lm	ll	lm	ll	ll	ll	ll	ll	lm	lm	lm	lm	lm	ll	ll	ll	ll	ll	ll	lm	lm	lm	ll	ll	ll
Marker24639	<lmxll>	lm	ll	ll	lm	ll	ll	ll	ll	ll	ll	ll	lm	ll	lm	ll	ll	ll	ll	ll	ll	ll	lm	ll	ll	ll	ll	ll	ll	ll	ll	ll	lm	lm	ll	ll	lm	ll	ll	ll	ll	ll	ll	lm	ll	lm	ll	ll	ll
Marker23637	<nnxnp>	np	np	nn	np	np	nn	nn	np	np	nn	np	np	nn	nn	np	np	np	np	np	np	np	nn	np	np	np	np	np	np	np	np	np	np	np	nn	np	nn	np	nn	nn	nn	np	nn	nn	np	nn	nn	nn	np
Marker32365	<lmxll>	lm	ll	ll	lm	ll	ll	ll	ll	ll	ll	ll	lm	ll	lm	ll	ll	ll	ll	ll	ll	ll	lm	ll	ll	ll	ll	ll	ll	ll	ll	ll	lm	lm	ll	ll	lm	ll	ll	ll	ll	ll	ll	lm	ll	lm	ll	ll	ll
Marker36719	<lmxll>	ll	lm	lm	ll	lm	lm	lm	lm	lm	lm	lm	ll	lm	ll	lm	lm	lm	lm	lm	lm	lm	ll	lm	lm	lm	lm	lm	lm	lm	lm	lm	ll	ll	ll	lm	ll	lm	lm	lm	lm	lm	lm	ll	lm	ll	lm	lm	lm
Marker42222	<lmxll>	ll	lm	lm	ll	lm	lm	lm	lm	lm	lm	lm	ll	lm	ll	lm	lm	lm	lm	lm	lm	lm	ll	lm	lm	lm	ll	lm	lm	lm	lm	lm	ll	ll	ll	lm	ll	ll	lm	lm	lm	lm	lm	ll	lm	ll	lm	lm	lm
Marker29397	<lmxll>	lm	ll	ll	lm	ll	ll	ll	ll	ll	ll	ll	lm	ll	lm	ll	ll	ll	ll	ll	ll	ll	lm	ll	ll	ll	lm	ll	ll	ll	ll	ll	lm	lm	lm	ll	lm	lm	ll	ll	ll	ll	ll	lm	ll	lm	ll	ll	ll
Marker41269	<lmxll>	lm	ll	ll	lm	ll	ll	ll	ll	ll	ll	ll	lm	ll	lm	ll	ll	ll	ll	ll	ll	ll	lm	ll	ll	ll	lm	ll	ll	ll	ll	ll	lm	lm	lm	ll	lm	lm	ll	ll	ll	ll	ll	lm	lm	lm	ll	ll	ll
Marker34246	<lmxll>	lm	ll	ll	lm	ll	ll	ll	ll	ll	ll	ll	lm	ll	lm	ll	ll	ll	ll	ll	ll	ll	lm	ll	ll	ll	lm	ll	ll	ll	ll	ll	lm	lm	lm	ll	lm	lm	ll	ll	ll	ll	ll	lm	lm	lm	ll	ll	ll
Marker30961	<lmxll>	ll	lm	lm	ll	lm	lm	lm	lm	lm	lm	lm	ll	lm	ll	lm	lm	lm	lm	lm	lm	lm	ll	lm	lm	lm	ll	lm	lm	lm	lm	lm	ll	lm	ll	lm	ll	ll	lm	lm	lm	lm	lm	ll	ll	ll	lm	lm	lm
Marker23633	<nnxnp>	nn	nn	np	nn	nn	np	np	nn	nn	np	nn	nn	np	np	nn	nn	nn	nn	nn	nn	nn	np	nn	nn	nn	nn	nn	nn	nn	nn	nn	nn	nn	np	nn	np	nn	nn	np	np	nn	np	np	nn	np	np	np	nn
Marker16714	<lmxll>	ll	lm	lm	ll	lm	lm	lm	lm	lm	lm	lm	ll	lm	ll	lm	lm	lm	lm	lm	lm	lm	ll	lm	lm	lm	ll	lm	lm	lm	lm	lm	ll	lm	ll	lm	ll	ll	lm	lm	lm	lm	lm	ll	ll	ll	lm	lm	lm
Marker20668	<lmxll>	lm	ll	ll	lm	ll	ll	ll	ll	ll	ll	ll	lm	ll	lm	ll	ll	ll	ll	ll	ll	ll	lm	ll	ll	ll	lm	ll	ll	ll	ll	ll	lm	lm	lm	ll	lm	ll	ll	ll	ll	ll	ll	lm	ll	lm	ll	ll	ll
Marker41073	<lmxll>	lm	ll	ll	lm	ll	ll	ll	ll	ll	ll	ll	lm	ll	lm	ll	ll	ll	ll	ll	ll	ll	lm	ll	ll	ll	lm	ll	ll	ll	ll	ll	lm	lm	lm	ll	lm	ll	ll	ll	ll	ll	ll	lm	ll	lm	ll	ll	ll
Marker1430	<efxeg>	fg	eg	eg	ef	--	ee	eg	--	eg	ee	eg	--	ee	ef	eg	ee	eg	ee	ee	eg	eg	ef	eg	--	ee	fg	eg	--	ee	ee	--	--	--	--	eg	--	--	ee	--	ee	--	--	ef	ee	--	--	ee	--
Marker28123	<lmxll>	lm	ll	ll	lm	ll	ll	ll	ll	ll	ll	ll	lm	ll	lm	ll	ll	ll	ll	ll	ll	ll	lm	ll	ll	ll	lm	ll	ll	ll	ll	ll	lm	lm	lm	ll	lm	ll	ll	ll	ll	ll	ll	lm	ll	lm	ll	ll	ll
Marker36671	<lmxll>	lm	ll	ll	lm	ll	ll	ll	ll	ll	ll	ll	lm	ll	lm	ll	ll	ll	ll	ll	ll	ll	lm	ll	ll	ll	lm	ll	ll	ll	ll	ll	lm	ll	ll	ll	lm	ll	ll	ll	ll	ll	ll	lm	ll	lm	ll	ll	ll
Marker23231	<lmxll>	lm	ll	ll	lm	ll	ll	ll	ll	ll	ll	ll	lm	ll	lm	ll	ll	ll	ll	ll	ll	ll	lm	ll	ll	ll	lm	ll	ll	ll	ll	ll	lm	ll	ll	ll	lm	ll	ll	ll	ll	ll	ll	lm	ll	lm	ll	ll	ll
Marker7064	<lmxll>	lm	ll	ll	lm	ll	ll	ll	ll	ll	ll	ll	lm	ll	lm	ll	ll	ll	ll	ll	ll	ll	lm	ll	ll	ll	lm	ll	ll	ll	ll	ll	lm	lm	ll	ll	lm	ll	ll	ll	ll	ll	ll	lm	ll	lm	ll	ll	ll
Marker25714	<lmxll>	ll	lm	lm	ll	lm	lm	lm	lm	lm	lm	lm	ll	lm	ll	lm	lm	lm	lm	lm	lm	lm	ll	lm	lm	lm	ll	lm	lm	lm	lm	lm	ll	ll	ll	lm	ll	lm	lm	lm	lm	lm	lm	ll	lm	ll	lm	lm	lm
Marker2128	<abxcd>	ad	bd	bc	ad	bd	--	--	--	--	bc	--	--	bc	--	bd	bd	--	bd	--	bd	bd	--	--	--	bd	ad	bd	--	bd	--	--	ad	--	ac	--	--	bd	--	--	--	--	--	ac	--	--	--	--	--
Marker17344	<lmxll>	lm	ll	ll	lm	ll	ll	ll	ll	ll	ll	ll	lm	ll	lm	ll	ll	ll	ll	ll	ll	ll	lm	ll	ll	ll	lm	ll	ll	ll	ll	ll	lm	lm	ll	ll	lm	ll	ll	ll	ll	ll	ll	lm	ll	lm	ll	ll	ll
Marker12291	<lmxll>	lm	ll	ll	lm	ll	ll	ll	ll	ll	ll	ll	lm	ll	lm	ll	ll	ll	ll	ll	ll	ll	lm	ll	ll	ll	lm	ll	ll	ll	ll	ll	lm	lm	lm	ll	lm	ll	ll	ll	ll	ll	ll	lm	ll	lm	ll	ll	ll
Marker7050	<lmxll>	lm	ll	ll	lm	ll	ll	ll	ll	ll	ll	ll	lm	ll	lm	ll	ll	ll	ll	ll	ll	ll	lm	ll	ll	ll	lm	ll	ll	ll	ll	ll	lm	lm	lm	ll	lm	ll	ll	ll	ll	ll	ll	lm	ll	lm	ll	ll	ll
Marker23627	<lmxll>	lm	ll	ll	lm	ll	ll	ll	ll	ll	ll	ll	lm	ll	lm	ll	ll	ll	ll	ll	ll	ll	lm	ll	ll	ll	lm	ll	ll	ll	ll	ll	lm	lm	lm	ll	lm	ll	ll	ll	ll	ll	ll	lm	ll	lm	ll	ll	ll
Marker2127	<lmxll>	lm	ll	ll	lm	ll	ll	ll	ll	ll	ll	ll	lm	ll	lm	ll	ll	ll	ll	ll	ll	ll	lm	ll	ll	ll	lm	ll	ll	ll	ll	ll	lm	lm	lm	ll	lm	ll	ll	ll	ll	ll	ll	lm	ll	lm	ll	ll	ll
Marker6854	<lmxll>	ll	lm	lm	ll	lm	lm	lm	lm	lm	lm	lm	ll	lm	ll	lm	lm	lm	lm	lm	lm	lm	ll	lm	lm	lm	ll	lm	lm	lm	lm	lm	ll	ll	ll	lm	ll	lm	lm	lm	lm	lm	lm	ll	lm	ll	lm	lm	lm
Marker40384	<lmxll>	lm	ll	ll	lm	ll	ll	ll	ll	ll	ll	ll	lm	ll	lm	ll	ll	ll	ll	ll	ll	ll	lm	ll	ll	ll	lm	ll	ll	ll	ll	ll	lm	lm	lm	ll	lm	ll	ll	ll	ll	ll	ll	lm	ll	lm	ll	ll	ll
Marker23015	<lmxll>	lm	ll	ll	lm	ll	ll	ll	ll	ll	ll	ll	lm	ll	lm	ll	ll	ll	ll	ll	ll	ll	lm	ll	ll	ll	lm	ll	ll	ll	ll	ll	lm	lm	lm	ll	lm	ll	ll	ll	ll	ll	ll	lm	ll	lm	ll	ll	ll
Marker37851	<nnxnp>	nn	np	np	nn	nn	np	np	nn	nn	np	np	nn	np	np	nn	nn	nn	nn	nn	nn	nn	np	nn	nn	nn	nn	nn	nn	nn	nn	nn	np	nn	np	nn	np	np	nn	np	np	nn	np	np	nn	np	np	np	nn
Marker21289	<lmxll>	ll	lm	lm	ll	lm	lm	lm	lm	lm	lm	lm	ll	lm	ll	lm	lm	lm	lm	lm	lm	lm	ll	lm	lm	lm	ll	lm	lm	lm	lm	lm	ll	ll	ll	lm	ll	lm	lm	lm	lm	lm	lm	ll	lm	ll	lm	lm	lm
Marker16750	<lmxll>	ll	lm	lm	ll	lm	lm	lm	lm	lm	lm	lm	ll	lm	ll	lm	lm	lm	lm	lm	lm	lm	ll	lm	lm	lm	ll	lm	lm	lm	lm	lm	ll	ll	ll	lm	ll	lm	lm	lm	lm	lm	lm	ll	lm	ll	lm	lm	lm
Marker25718	<lmxll>	ll	lm	lm	ll	lm	lm	lm	lm	lm	lm	lm	ll	lm	ll	lm	lm	lm	lm	lm	lm	lm	ll	lm	lm	lm	ll	lm	lm	lm	lm	lm	ll	ll	ll	lm	ll	lm	lm	lm	lm	lm	lm	ll	lm	ll	lm	lm	lm
Marker28476	<lmxll>	lm	ll	ll	lm	ll	ll	ll	ll	ll	ll	ll	lm	ll	lm	ll	ll	ll	ll	ll	ll	ll	lm	ll	ll	ll	lm	ll	ll	ll	ll	ll	lm	lm	lm	ll	lm	ll	ll	ll	ll	ll	ll	lm	ll	lm	ll	ll	ll
Marker13197	<lmxll>	ll	lm	lm	ll	lm	lm	lm	lm	lm	lm	lm	ll	lm	ll	lm	lm	lm	lm	lm	lm	lm	ll	lm	lm	lm	ll	lm	lm	lm	lm	lm	ll	ll	ll	lm	ll	lm	lm	lm	lm	lm	lm	ll	lm	ll	lm	lm	lm
Marker6855	<lmxll>	lm	ll	ll	lm	ll	ll	ll	ll	ll	ll	ll	lm	ll	lm	ll	ll	ll	ll	ll	ll	ll	lm	ll	ll	ll	lm	ll	ll	ll	ll	ll	ll	lm	lm	ll	lm	ll	ll	ll	ll	ll	ll	lm	ll	lm	ll	ll	ll
Marker38885	<lmxll>	ll	lm	lm	ll	lm	lm	lm	lm	lm	lm	lm	ll	lm	ll	lm	lm	lm	lm	lm	lm	lm	ll	lm	lm	lm	ll	lm	lm	lm	lm	lm	lm	ll	ll	lm	ll	lm	lm	lm	lm	lm	lm	ll	lm	ll	lm	lm	lm
Marker37839	<efxeg>	ee	fg	--	ee	ef	fg	fg	--	ef	fg	fg	ee	fg	eg	ef	--	fg	ef	--	--	ef	eg	ef	--	ef	ee	ef	ef	ef	--	--	--	ef	--	--	--	--	--	--	--	--	--	--	--	--	--	--	--
Marker7041	<lmxll>	ll	lm	lm	ll	lm	lm	lm	lm	lm	lm	lm	ll	lm	ll	lm	lm	lm	lm	lm	lm	lm	ll	lm	lm	lm	ll	lm	lm	lm	lm	lm	ll	ll	ll	lm	ll	lm	lm	lm	lm	lm	lm	ll	ll	ll	lm	lm	lm
Marker12293	<lmxll>	lm	ll	ll	lm	ll	ll	ll	ll	ll	ll	ll	lm	ll	lm	ll	ll	ll	ll	ll	ll	ll	lm	ll	ll	ll	lm	ll	ll	ll	ll	ll	lm	ll	lm	ll	lm	ll	ll	ll	ll	ll	ll	lm	lm	lm	ll	ll	ll
Marker7042	<lmxll>	lm	ll	ll	lm	ll	ll	ll	ll	ll	ll	ll	lm	ll	lm	ll	ll	ll	ll	ll	ll	ll	lm	ll	ll	ll	ll	ll	ll	ll	ll	ll	lm	lm	ll	ll	lm	ll	ll	ll	ll	ll	ll	lm	ll	lm	ll	ll	ll
Marker16748	<lmxll>	ll	lm	lm	ll	lm	lm	lm	lm	lm	lm	lm	ll	lm	ll	lm	lm	lm	lm	lm	lm	lm	ll	lm	lm	lm	ll	lm	lm	lm	lm	lm	lm	ll	ll	lm	ll	lm	lm	lm	lm	lm	lm	ll	ll	ll	lm	lm	ll
Marker37859	<nnxnp>	nn	np	np	nn	nn	np	np	nn	nn	np	np	nn	np	np	nn	nn	np	nn	nn	nn	nn	np	nn	nn	nn	nn	nn	nn	nn	nn	nn	np	nn	np	nn	np	np	nn	nn	np	nn	np	np	nn	np	np	nn	nn
Marker30774	<lmxll>	lm	ll	ll	lm	ll	ll	ll	ll	ll	ll	ll	lm	ll	lm	ll	ll	ll	ll	ll	ll	ll	lm	ll	ll	ll	lm	ll	ll	ll	ll	ll	lm	lm	lm	ll	lm	lm	ll	ll	ll	ll	ll	lm	lm	lm	ll	ll	ll
Marker37283	<lmxll>	ll	lm	lm	ll	lm	ll	lm	lm	lm	lm	lm	ll	lm	ll	lm	lm	lm	lm	lm	lm	lm	ll	lm	lm	lm	ll	lm	lm	lm	lm	lm	ll	ll	ll	lm	ll	lm	lm	lm	lm	lm	lm	ll	ll	ll	lm	lm	lm
Marker30775	<efxeg>	ef	ee	--	ef	ee	ee	ee	ee	ee	--	ee	ef	ee	--	ee	ee	ee	ee	ee	ee	ee	--	ee	--	ee	ef	ee	ee	ee	--	--	ee	ef	--	ee	--	ee	--	ee	--	ee	ee	--	ee	--	ee	--	--
Marker7035	<lmxll>	lm	ll	ll	lm	ll	ll	ll	ll	ll	ll	ll	lm	ll	lm	ll	ll	ll	ll	ll	ll	ll	lm	ll	ll	lm	lm	ll	ll	ll	ll	ll	lm	lm	lm	ll	lm	ll	ll	ll	ll	ll	ll	lm	lm	lm	ll	ll	ll
Marker14539	<lmxll>	ll	lm	lm	ll	lm	lm	lm	lm	lm	lm	lm	ll	lm	ll	lm	lm	lm	lm	lm	lm	lm	ll	lm	lm	ll	ll	lm	lm	lm	lm	lm	ll	ll	ll	lm	ll	lm	lm	lm	lm	lm	lm	ll	ll	ll	lm	lm	ll
Marker36658	<lmxll>	lm	ll	ll	lm	ll	ll	ll	ll	ll	ll	ll	lm	ll	lm	ll	ll	ll	ll	ll	ll	ll	lm	ll	ll	lm	lm	ll	ll	ll	ll	ll	lm	lm	lm	ll	lm	lm	ll	ll	ll	ll	ll	lm	lm	lm	ll	ll	ll
Marker12988	<efxeg>	ee	ef	fg	ee	ef	fg	fg	--	ef	--	ef	ee	--	eg	ef	--	ee	ef	ef	ef	--	eg	ef	ef	ef	ee	ef	ef	--	ee	--	ee	ee	eg	ef	ee	ee	--	--	--	--	--	ee	ee	--	--	--	--
Marker59332	<nnxnp>	nn	np	np	nn	nn	nn	np	nn	nn	np	np	nn	np	np	nn	nn	np	nn	nn	nn	nn	np	nn	nn	nn	nn	nn	nn	nn	nn	nn	np	nn	np	nn	np	np	nn	nn	np	nn	np	np	nn	np	nn	nn	nn
Marker41222	<efxeg>	ee	ee	ee	eg	eg	--	ee	--	ee	ee	ee	eg	--	ee	eg	--	--	eg	eg	eg	eg	ee	eg	eg	eg	eg	eg	eg	eg	eg	--	ee	eg	ee	--	ee	ee	ee	--	ee	--	ee	ee	--	--	--	--	--
Marker41264	<nnxnp>	np	np	np	nn	nn	nn	np	nn	np	np	np	nn	np	np	nn	nn	np	nn	nn	nn	nn	np	nn	nn	nn	nn	nn	nn	nn	nn	nn	np	nn	np	nn	np	np	np	nn	np	nn	np	np	nn	np	nn	nn	nn
Marker42958	<efxeg>	--	ee	ee	ee	eg	--	fg	--	--	eg	ee	ef	ee	--	fg	--	ee	ee	ef	ee	--	ee	ee	ee	ee	ee	eg	ee	fg	ee	--	fg	ef	--	--	eg	--	ee	--	ee	--	--	--	ef	--	--	--	--
Marker11157	<lmxll>	ll	lm	lm	lm	lm	lm	ll	lm	lm	lm	lm	lm	lm	lm	lm	ll	lm	lm	ll	lm	ll	lm	lm	lm	lm	ll	lm	lm	ll	lm	ll	ll	ll	ll	ll	ll	ll	lm	lm	lm	lm	ll	ll	lm	ll	lm	lm	lm
Marker28854	<lmxll>	lm	ll	ll	ll	ll	ll	lm	ll	lm	ll	ll	lm	ll	lm	ll	ll	ll	ll	lm	ll	lm	ll	ll	ll	ll	ll	ll	ll	lm	ll	lm	lm	lm	lm	lm	ll	lm	ll	lm	ll	ll	lm	lm	ll	lm	ll	ll	ll
Marker24091	<lmxll>	ll	lm	lm	lm	lm	ll	ll	lm	lm	lm	lm	ll	lm	ll	lm	ll	lm	lm	ll	lm	ll	ll	lm	ll	lm	ll	lm	lm	ll	lm	ll	ll	ll	ll	ll	ll	ll	lm	ll	lm	ll	ll	ll	lm	ll	lm	lm	lm
Marker37137	<lmxll>	lm	ll	ll	ll	ll	ll	lm	ll	ll	ll	ll	lm	ll	lm	ll	lm	ll	ll	lm	ll	lm	ll	ll	ll	ll	lm	ll	ll	lm	ll	lm	lm	lm	lm	lm	ll	lm	ll	lm	ll	lm	lm	lm	ll	lm	ll	ll	ll
Marker41322	<lmxll>	lm	ll	ll	lm	ll	lm	lm	ll	lm	ll	lm	lm	ll	lm	ll	lm	ll	ll	lm	ll	lm	ll	ll	lm	ll	lm	ll	ll	lm	ll	lm	lm	lm	lm	lm	lm	lm	ll	lm	ll	ll	lm	lm	ll	lm	ll	ll	ll
Marker4809	<lmxll>	ll	lm	lm	lm	lm	ll	ll	lm	lm	lm	lm	ll	lm	ll	lm	ll	lm	lm	ll	lm	ll	ll	lm	lm	lm	ll	lm	lm	ll	lm	ll	ll	ll	ll	ll	ll	ll	lm	ll	lm	ll	ll	ll	lm	ll	lm	lm	lm
Marker39646	<lmxll>	ll	lm	lm	lm	lm	ll	ll	lm	ll	lm	lm	ll	lm	ll	lm	lm	lm	lm	ll	lm	ll	lm	lm	lm	lm	lm	lm	lm	ll	lm	ll	ll	ll	ll	ll	lm	ll	lm	ll	lm	lm	ll	ll	lm	ll	lm	lm	lm
Marker6580	<lmxll>	ll	lm	lm	ll	lm	ll	ll	lm	ll	lm	ll	ll	lm	ll	lm	ll	lm	lm	ll	lm	ll	lm	lm	ll	lm	ll	lm	lm	ll	lm	ll	ll	ll	ll	ll	ll	ll	lm	ll	lm	lm	ll	ll	lm	ll	lm	lm	lm
Marker17384	<lmxll>	ll	lm	lm	lm	lm	ll	ll	lm	lm	lm	lm	ll	lm	ll	lm	ll	lm	lm	ll	lm	ll	lm	lm	lm	lm	ll	lm	lm	ll	lm	ll	ll	ll	ll	ll	ll	ll	lm	ll	lm	ll	ll	ll	lm	ll	lm	lm	lm
Marker8736	<lmxll>	ll	lm	lm	lm	lm	ll	ll	lm	ll	lm	lm	ll	lm	ll	lm	ll	lm	lm	ll	lm	ll	lm	lm	ll	lm	ll	lm	lm	ll	lm	ll	lm	ll	ll	ll	ll	ll	lm	ll	lm	lm	ll	ll	ll	ll	lm	lm	lm
Marker10804	<lmxll>	lm	ll	ll	ll	ll	lm	lm	ll	lm	ll	ll	lm	ll	lm	ll	lm	ll	ll	lm	ll	lm	ll	ll	lm	ll	lm	ll	ll	lm	ll	lm	lm	lm	lm	lm	lm	lm	ll	lm	ll	ll	lm	lm	lm	lm	ll	ll	ll
Marker14928	<lmxll>	lm	ll	ll	ll	ll	lm	lm	ll	lm	ll	ll	lm	ll	lm	ll	lm	ll	ll	lm	ll	lm	ll	ll	lm	ll	lm	ll	ll	lm	ll	lm	lm	lm	lm	lm	lm	lm	ll	lm	ll	ll	lm	lm	lm	lm	ll	ll	ll
Marker33892	<lmxll>	lm	ll	ll	ll	ll	lm	lm	ll	lm	ll	ll	lm	ll	lm	ll	lm	ll	ll	lm	ll	lm	ll	ll	lm	ll	lm	ll	ll	lm	ll	lm	lm	lm	lm	lm	lm	lm	ll	lm	ll	ll	lm	lm	lm	lm	ll	ll	ll
Marker11955	<lmxll>	lm	ll	ll	ll	ll	lm	lm	ll	lm	ll	ll	lm	ll	lm	ll	lm	ll	ll	lm	ll	lm	ll	ll	lm	ll	lm	ll	ll	lm	ll	lm	lm	lm	lm	lm	lm	lm	ll	lm	ll	ll	lm	lm	ll	lm	ll	ll	ll
Marker13605	<lmxll>	lm	ll	ll	ll	ll	lm	lm	ll	ll	ll	ll	lm	ll	lm	ll	lm	ll	ll	lm	ll	lm	ll	ll	lm	ll	lm	ll	ll	lm	ll	lm	lm	lm	lm	lm	lm	lm	ll	lm	ll	ll	lm	lm	ll	lm	ll	ll	ll
Marker33182	<lmxll>	ll	lm	lm	lm	lm	ll	ll	lm	lm	lm	lm	ll	lm	ll	lm	ll	lm	lm	ll	lm	ll	lm	lm	ll	lm	ll	lm	lm	ll	lm	ll	ll	ll	ll	ll	ll	ll	lm	ll	lm	lm	ll	ll	lm	ll	lm	lm	lm
Marker29365	<lmxll>	ll	lm	lm	lm	lm	ll	ll	lm	lm	lm	lm	ll	lm	ll	lm	ll	lm	lm	ll	lm	ll	lm	lm	ll	lm	ll	lm	lm	ll	lm	ll	lm	ll	ll	ll	ll	ll	lm	ll	lm	lm	ll	ll	ll	ll	lm	lm	lm
Marker29544	<lmxll>	lm	ll	ll	ll	ll	lm	lm	ll	ll	ll	ll	ll	ll	lm	ll	lm	ll	ll	lm	ll	lm	ll	ll	ll	ll	lm	ll	ll	lm	ll	lm	lm	lm	lm	lm	lm	lm	ll	ll	ll	ll	lm	lm	ll	lm	ll	ll	ll
Marker6534	<lmxll>	ll	lm	lm	lm	lm	ll	ll	lm	lm	lm	lm	ll	lm	ll	lm	ll	lm	lm	ll	lm	ll	lm	lm	lm	lm	ll	lm	lm	ll	lm	ll	ll	ll	ll	ll	ll	ll	lm	ll	lm	ll	ll	ll	lm	ll	lm	lm	lm
Marker39629	<lmxll>	ll	lm	lm	lm	lm	ll	ll	lm	lm	lm	lm	ll	lm	ll	lm	ll	lm	lm	ll	lm	ll	lm	lm	lm	lm	ll	lm	lm	ll	lm	ll	ll	ll	ll	ll	lm	ll	lm	ll	lm	ll	ll	ll	lm	ll	lm	lm	lm
Marker7976	<lmxll>	ll	lm	lm	lm	lm	ll	ll	lm	lm	lm	lm	ll	lm	ll	lm	ll	lm	lm	ll	lm	ll	lm	lm	ll	lm	ll	lm	lm	ll	lm	ll	ll	ll	ll	ll	ll	ll	lm	ll	lm	lm	ll	ll	lm	ll	lm	lm	lm
Marker11573	<lmxll>	ll	lm	lm	lm	lm	ll	ll	lm	lm	lm	lm	ll	lm	ll	lm	ll	lm	lm	ll	lm	ll	lm	lm	lm	lm	ll	lm	lm	ll	lm	ll	ll	ll	ll	ll	ll	ll	lm	ll	lm	lm	ll	ll	lm	ll	lm	lm	lm
Marker18295	<lmxll>	ll	lm	lm	lm	lm	ll	ll	lm	lm	lm	lm	ll	lm	ll	lm	ll	lm	lm	ll	lm	ll	lm	lm	lm	lm	ll	lm	lm	ll	lm	ll	ll	ll	ll	ll	ll	ll	lm	ll	lm	lm	ll	ll	lm	ll	lm	lm	lm
Marker38417	<lmxll>	ll	lm	lm	lm	lm	ll	ll	lm	lm	lm	lm	lm	lm	ll	lm	ll	lm	lm	ll	lm	ll	lm	lm	lm	lm	ll	lm	lm	ll	lm	ll	ll	ll	ll	ll	ll	ll	lm	ll	lm	lm	ll	ll	lm	ll	lm	lm	lm
Marker5531	<lmxll>	lm	ll	ll	ll	ll	lm	lm	ll	ll	ll	ll	lm	ll	lm	ll	lm	ll	ll	lm	ll	lm	ll	ll	ll	ll	lm	ll	ll	lm	ll	lm	lm	lm	lm	lm	lm	lm	ll	lm	ll	ll	lm	ll	ll	lm	ll	ll	ll
Marker14911	<lmxll>	lm	ll	ll	ll	ll	lm	lm	ll	ll	ll	ll	lm	ll	lm	ll	lm	ll	ll	lm	ll	lm	ll	ll	ll	ll	lm	ll	ll	lm	ll	lm	lm	lm	lm	lm	lm	lm	ll	lm	ll	ll	lm	ll	ll	lm	ll	ll	ll
Marker11579	<lmxll>	lm	ll	ll	ll	ll	lm	lm	ll	ll	ll	ll	lm	ll	lm	ll	lm	ll	ll	lm	ll	lm	ll	ll	ll	ll	lm	ll	ll	lm	ll	lm	lm	lm	lm	lm	lm	lm	ll	lm	ll	ll	lm	lm	ll	lm	ll	ll	ll
Marker29553	<lmxll>	ll	lm	lm	lm	lm	ll	ll	lm	lm	lm	lm	ll	lm	ll	lm	ll	lm	lm	ll	lm	ll	lm	lm	lm	lm	ll	lm	lm	ll	lm	ll	ll	ll	ll	ll	ll	ll	lm	ll	lm	lm	ll	ll	lm	ll	lm	lm	lm
Marker33668	<lmxll>	ll	lm	lm	lm	lm	ll	ll	lm	ll	lm	lm	ll	lm	ll	lm	ll	lm	lm	ll	lm	ll	lm	lm	lm	lm	ll	lm	lm	ll	lm	ll	ll	ll	ll	ll	ll	ll	lm	ll	lm	lm	ll	ll	lm	ll	lm	lm	lm
Marker22453	<lmxll>	ll	lm	lm	lm	lm	ll	ll	lm	ll	lm	lm	ll	lm	ll	lm	ll	lm	lm	ll	lm	ll	lm	lm	lm	lm	ll	lm	lm	ll	lm	ll	ll	ll	ll	ll	ll	ll	lm	ll	lm	lm	ll	ll	lm	ll	lm	lm	lm
Marker39634	<lmxll>	lm	ll	ll	ll	ll	lm	lm	ll	lm	ll	ll	lm	ll	lm	ll	lm	ll	ll	lm	ll	lm	ll	ll	ll	ll	lm	ll	ll	lm	ll	lm	lm	lm	lm	lm	lm	lm	ll	lm	ll	ll	lm	lm	ll	lm	ll	ll	ll
Marker32169	<lmxll>	lm	ll	ll	ll	ll	lm	lm	ll	lm	ll	ll	lm	ll	lm	ll	lm	ll	ll	lm	ll	lm	ll	ll	ll	ll	lm	ll	ll	lm	ll	lm	lm	lm	lm	lm	lm	lm	ll	lm	ll	ll	lm	lm	ll	lm	ll	ll	ll
Marker13614	<abxcd>	--	bd	bd	bd	--	--	--	--	bd	--	bd	ad	bd	ad	bd	--	bd	bd	--	bd	--	bd	bd	bd	--	ad	--	--	--	bd	--	--	ad	--	--	--	--	--	--	--	--	--	--	--	--	--	bd	--
Marker11560	<lmxll>	lm	ll	ll	ll	ll	lm	lm	ll	lm	ll	ll	lm	ll	lm	ll	lm	ll	ll	lm	ll	lm	ll	ll	ll	ll	lm	ll	ll	lm	ll	lm	lm	lm	lm	lm	lm	lm	ll	lm	ll	ll	lm	lm	ll	lm	ll	ll	ll
Marker29552	<lmxll>	lm	ll	ll	ll	ll	lm	lm	ll	lm	ll	ll	lm	ll	lm	ll	lm	ll	ll	lm	ll	lm	ll	ll	ll	ll	lm	ll	ll	lm	ll	lm	lm	lm	lm	lm	lm	lm	ll	lm	ll	ll	lm	lm	ll	lm	ll	ll	ll
Marker4004	<abxcd>	--	--	bd	bd	--	--	--	--	--	--	bd	ad	--	ad	--	--	bd	bd	ad	bd	--	bd	--	--	--	ad	--	--	--	bd	--	--	ad	--	--	--	--	--	--	--	--	--	--	--	--	--	--	--
Marker25452	<lmxll>	lm	ll	ll	ll	ll	lm	lm	ll	lm	ll	ll	lm	ll	lm	ll	lm	ll	ll	lm	ll	lm	ll	ll	ll	ll	lm	ll	ll	lm	ll	lm	lm	lm	lm	lm	lm	lm	ll	lm	ll	ll	lm	lm	ll	lm	ll	ll	ll
Marker29123	<abxcd>	--	bc	bc	bc	bd	ac	ad	bc	--	bd	bc	ac	bc	ac	bc	--	bc	bc	ac	bc	--	bc	bc	--	bc	ad	bd	--	ad	bc	--	--	--	--	--	--	ac	--	--	--	--	ad	--	--	--	bc	--	bc
Marker31747	<lmxll>	ll	lm	lm	lm	lm	ll	ll	lm	ll	lm	lm	ll	lm	ll	lm	ll	lm	lm	ll	lm	ll	lm	lm	lm	lm	ll	lm	lm	ll	lm	ll	ll	ll	ll	ll	ll	ll	lm	ll	lm	lm	ll	ll	lm	ll	lm	lm	lm
Marker33016	<lmxll>	ll	lm	lm	lm	lm	ll	ll	lm	ll	lm	lm	ll	lm	ll	lm	ll	lm	lm	ll	lm	ll	lm	lm	lm	lm	ll	lm	lm	ll	lm	ll	ll	ll	ll	ll	ll	ll	lm	ll	lm	lm	ll	ll	lm	ll	lm	lm	lm
Marker28459	<lmxll>	lm	ll	ll	ll	ll	lm	lm	ll	lm	ll	ll	lm	ll	lm	ll	lm	ll	ll	lm	ll	lm	ll	ll	ll	ll	lm	ll	ll	lm	ll	lm	lm	lm	lm	lm	lm	lm	ll	lm	ll	ll	lm	lm	ll	lm	ll	ll	ll
Marker42754	<lmxll>	ll	lm	lm	lm	lm	ll	ll	lm	ll	lm	lm	ll	lm	ll	lm	ll	lm	lm	ll	lm	ll	lm	lm	lm	lm	ll	lm	lm	ll	lm	ll	ll	ll	ll	ll	ll	ll	lm	ll	lm	lm	ll	ll	lm	ll	lm	lm	lm
Marker21197	<efxeg>	eg	ef	ef	ef	fg	ee	eg	ef	ef	fg	ef	ee	ef	ee	ef	eg	ef	ef	ee	ef	eg	ef	ef	ef	ef	eg	fg	ef	eg	ef	ee	eg	ee	eg	eg	ee	ee	ef	ee	ef	fg	eg	ee	ef	ee	ef	ee	ef
Marker10645	<lmxll>	lm	ll	ll	ll	ll	lm	lm	ll	lm	ll	ll	lm	ll	lm	ll	lm	ll	ll	lm	ll	lm	ll	ll	ll	ll	lm	ll	ll	lm	ll	lm	lm	lm	lm	lm	lm	lm	ll	lm	ll	ll	lm	lm	ll	lm	ll	ll	ll
Marker24127	<lmxll>	lm	ll	ll	ll	ll	lm	lm	ll	lm	ll	ll	lm	ll	lm	ll	lm	ll	ll	lm	ll	lm	ll	ll	ll	ll	lm	ll	ll	lm	ll	lm	lm	lm	ll	lm	lm	lm	ll	lm	ll	ll	lm	lm	ll	lm	ll	ll	ll
Marker38213	<lmxll>	lm	ll	ll	ll	ll	lm	lm	ll	lm	ll	ll	lm	ll	lm	ll	lm	ll	ll	lm	ll	lm	ll	ll	ll	ll	lm	ll	ll	lm	ll	lm	lm	lm	ll	lm	lm	lm	ll	lm	ll	ll	lm	lm	ll	lm	ll	ll	ll
Marker22685	<lmxll>	lm	ll	ll	ll	ll	lm	lm	ll	lm	ll	ll	lm	ll	lm	ll	lm	ll	ll	lm	ll	lm	ll	ll	ll	ll	lm	ll	ll	lm	ll	lm	ll	lm	ll	lm	lm	lm	ll	lm	ll	ll	lm	lm	ll	lm	ll	ll	ll
Marker23678	<lmxll>	lm	ll	ll	ll	ll	lm	lm	ll	lm	ll	ll	lm	ll	lm	ll	lm	ll	ll	lm	ll	lm	ll	ll	ll	ll	lm	ll	ll	lm	ll	lm	ll	lm	ll	lm	lm	lm	ll	lm	ll	ll	lm	lm	ll	lm	ll	ll	ll
Marker34947	<lmxll>	lm	ll	ll	ll	ll	lm	lm	ll	lm	ll	ll	lm	ll	lm	ll	lm	ll	ll	lm	ll	lm	ll	ll	ll	ll	lm	ll	ll	lm	ll	lm	lm	lm	ll	lm	lm	lm	ll	lm	ll	ll	lm	lm	ll	lm	ll	ll	ll
Marker23555	<nnxnp>	np	nn	nn	nn	np	nn	np	nn	nn	np	nn	nn	nn	nn	nn	np	nn	nn	nn	nn	np	nn	nn	nn	nn	np	np	nn	np	nn	nn	np	nn	np	np	np	nn	nn	nn	np	np	nn	nn	nn	nn	nn	nn	nn
Marker6082	<lmxll>	ll	lm	lm	lm	lm	ll	ll	lm	ll	lm	lm	ll	lm	ll	lm	ll	lm	lm	ll	lm	ll	lm	lm	lm	lm	ll	lm	lm	ll	lm	ll	lm	ll	lm	ll	ll	ll	lm	ll	lm	lm	ll	ll	lm	ll	lm	lm	lm
Marker14313	<lmxll>	lm	ll	ll	ll	ll	lm	lm	ll	lm	ll	ll	lm	ll	lm	ll	lm	ll	ll	lm	ll	lm	ll	ll	ll	ll	lm	ll	ll	lm	ll	lm	ll	lm	ll	lm	lm	lm	ll	lm	ll	ll	lm	lm	ll	lm	ll	ll	ll
Marker36416	<lmxll>	lm	ll	ll	ll	ll	lm	lm	ll	lm	ll	ll	lm	ll	lm	ll	lm	ll	ll	lm	ll	lm	ll	ll	ll	ll	lm	ll	ll	lm	ll	lm	ll	lm	ll	lm	lm	lm	ll	lm	ll	ll	lm	lm	ll	lm	ll	ll	ll
Marker17166	<lmxll>	ll	lm	lm	lm	lm	ll	ll	lm	lm	lm	lm	ll	lm	ll	lm	ll	lm	lm	ll	lm	ll	lm	lm	lm	lm	ll	lm	lm	ll	lm	ll	ll	ll	ll	ll	ll	ll	lm	ll	lm	lm	ll	ll	lm	ll	lm	lm	lm
Marker28445	<lmxll>	ll	lm	lm	lm	lm	ll	ll	lm	ll	lm	lm	ll	lm	ll	lm	ll	lm	lm	ll	lm	ll	lm	lm	lm	lm	ll	lm	lm	ll	lm	ll	ll	ll	ll	ll	ll	ll	lm	ll	lm	lm	ll	ll	lm	ll	lm	lm	lm
Marker8556	<lmxll>	ll	lm	lm	lm	lm	ll	ll	lm	lm	lm	lm	ll	lm	ll	lm	ll	lm	lm	ll	lm	ll	lm	lm	lm	lm	ll	lm	lm	ll	lm	ll	ll	ll	ll	ll	ll	ll	lm	ll	lm	ll	ll	ll	lm	ll	lm	lm	lm
Marker57989	<nnxnp>	nn	np	np	np	nn	np	nn	np	np	nn	np	np	np	np	np	np	np	np	np	np	nn	np	np	np	np	nn	nn	np	nn	np	np	nn	np	nn	nn	np	np	np	np	np	nn	nn	np	np	np	np	np	np
Marker18222	<efxeg>	ee	--	ef	--	ef	--	ee	--	ef	ef	--	ee	ef	ee	--	--	--	--	ee	--	ee	--	--	--	--	ee	ef	--	ee	--	--	ee	ef	ee	ee	ee	ee	--	--	ee	--	--	ee	--	--	--	--	--
Marker29546	<nnxnp>	nn	np	np	np	nn	np	nn	np	np	nn	np	np	np	np	np	nn	np	np	np	np	nn	np	np	np	np	nn	nn	np	nn	np	np	nn	np	nn	nn	np	np	np	np	np	nn	nn	np	np	np	np	np	np
Marker38414	<nnxnp>	np	nn	nn	nn	np	nn	np	nn	nn	np	nn	nn	nn	nn	nn	np	nn	nn	nn	nn	np	nn	nn	nn	nn	np	np	nn	np	nn	nn	np	nn	np	np	nn	nn	nn	nn	nn	np	np	nn	nn	nn	nn	nn	nn
Marker52140	<nnxnp>	np	nn	nn	nn	np	nn	np	nn	nn	np	nn	nn	nn	nn	nn	nn	nn	nn	nn	nn	np	nn	nn	nn	nn	np	np	nn	np	nn	nn	np	nn	np	np	nn	nn	nn	nn	nn	np	np	nn	nn	nn	nn	nn	nn
Marker11569	<nnxnp>	nn	np	np	np	nn	np	nn	np	np	nn	np	np	np	np	np	np	np	np	np	np	nn	np	np	np	np	nn	nn	np	nn	np	np	nn	np	nn	nn	np	np	np	np	np	nn	nn	np	np	np	np	np	np
Marker62557	<nnxnp>	np	nn	nn	nn	np	nn	np	nn	nn	np	nn	nn	nn	nn	nn	nn	nn	nn	nn	nn	np	nn	nn	nn	nn	np	np	nn	np	nn	nn	np	nn	np	np	nn	nn	nn	nn	nn	np	np	nn	nn	nn	nn	nn	nn
Marker30190	<lmxll>	lm	ll	ll	ll	ll	lm	lm	ll	ll	ll	ll	lm	ll	lm	ll	lm	ll	ll	lm	ll	lm	ll	ll	ll	ll	lm	ll	ll	lm	ll	lm	lm	lm	lm	lm	lm	lm	ll	lm	ll	lm	ll	lm	lm	lm	ll	ll	ll
Marker28737	<nnxnp>	np	nn	nn	nn	np	nn	np	nn	nn	np	nn	nn	nn	nn	nn	nn	nn	nn	nn	nn	np	nn	nn	nn	nn	np	np	nn	np	nn	nn	np	nn	np	np	nn	nn	nn	nn	nn	np	np	nn	nn	nn	nn	nn	nn
Marker18219	<nnxnp>	np	nn	nn	nn	np	nn	np	nn	nn	np	nn	nn	nn	nn	nn	nn	nn	nn	nn	nn	np	nn	nn	nn	nn	np	np	nn	np	nn	nn	np	nn	np	np	nn	nn	nn	nn	nn	np	nn	nn	nn	nn	nn	nn	nn
Marker18231	<nnxnp>	np	nn	nn	nn	np	nn	np	nn	nn	np	nn	nn	nn	nn	nn	nn	nn	nn	nn	nn	np	nn	nn	nn	nn	np	np	nn	np	nn	nn	np	nn	np	np	nn	nn	nn	nn	nn	np	nn	nn	nn	nn	nn	nn	nn
Marker49791	<nnxnp>	np	nn	nn	nn	np	nn	np	nn	nn	np	nn	nn	nn	nn	nn	np	nn	nn	nn	nn	np	nn	nn	nn	nn	np	np	nn	np	nn	nn	np	nn	np	np	np	nn	nn	nn	nn	np	nn	nn	nn	nn	nn	nn	nn
Marker31139	<lmxll>	lm	ll	ll	ll	ll	lm	lm	ll	ll	ll	ll	lm	lm	lm	ll	lm	ll	ll	lm	ll	lm	ll	ll	lm	ll	lm	ll	ll	lm	ll	lm	lm	lm	lm	lm	lm	lm	ll	lm	ll	lm	ll	lm	lm	lm	ll	ll	ll
Marker43343	<efxeg>	--	ef	--	ef	fg	ef	fg	ef	ef	--	ef	ef	--	ef	ef	--	ef	ef	--	ef	fg	ef	ef	ef	ef	fg	--	ef	fg	--	--	--	--	--	fg	ee	ef	--	--	--	--	--	ee	ef	--	ee	ef	--
Marker43344	<efxeg>	fg	ef	--	ef	fg	ee	fg	ef	ef	fg	ef	ef	--	ef	ef	--	ef	ef	--	ef	fg	ef	ef	ef	--	fg	fg	ef	fg	--	--	--	--	--	fg	--	ef	--	--	--	--	--	ee	ef	--	ee	ef	ef
Marker41325	<lmxll>	ll	lm	lm	lm	lm	ll	ll	lm	lm	lm	lm	ll	ll	ll	lm	ll	lm	lm	ll	lm	ll	lm	lm	ll	lm	ll	lm	lm	ll	lm	ll	ll	ll	ll	ll	ll	ll	lm	ll	lm	ll	lm	ll	ll	ll	lm	lm	lm
Marker21178	<lmxll>	ll	lm	lm	lm	lm	ll	ll	lm	lm	lm	lm	ll	ll	ll	lm	ll	lm	lm	ll	lm	ll	lm	lm	ll	lm	ll	lm	lm	ll	lm	ll	ll	ll	ll	ll	ll	ll	lm	ll	lm	ll	lm	ll	ll	ll	lm	lm	lm
Marker41318	<lmxll>	ll	lm	lm	lm	lm	ll	ll	lm	lm	lm	lm	ll	ll	ll	lm	ll	lm	lm	ll	lm	ll	lm	lm	ll	lm	ll	lm	lm	ll	lm	ll	ll	ll	ll	ll	ll	ll	lm	ll	lm	ll	lm	ll	ll	ll	lm	lm	lm
Marker5524	<nnxnp>	np	nn	nn	nn	np	nn	np	nn	nn	np	nn	nn	nn	nn	nn	np	nn	nn	nn	nn	np	nn	nn	nn	nn	nn	np	nn	np	nn	nn	np	nn	np	np	nn	nn	nn	nn	nn	np	np	nn	nn	nn	nn	nn	nn
Marker13610	<nnxnp>	np	nn	nn	nn	np	nn	np	nn	nn	np	nn	nn	nn	nn	nn	np	nn	nn	nn	nn	np	nn	nn	nn	nn	nn	np	nn	np	nn	nn	np	nn	np	np	nn	nn	nn	nn	nn	np	np	nn	nn	nn	nn	nn	nn
Marker13617	<nnxnp>	nn	np	np	np	nn	np	nn	np	np	nn	np	np	np	np	np	nn	np	np	np	np	nn	np	np	np	np	np	nn	np	nn	np	np	nn	np	nn	nn	np	np	np	np	np	nn	nn	np	np	np	np	np	np
Marker28180	<lmxll>	ll	lm	lm	lm	lm	ll	ll	lm	lm	lm	lm	ll	ll	ll	lm	ll	lm	ll	ll	lm	ll	lm	lm	ll	lm	ll	lm	lm	ll	lm	ll	ll	ll	ll	ll	ll	ll	lm	ll	lm	ll	lm	ll	ll	ll	lm	lm	lm
Marker28183	<lmxll>	lm	ll	ll	ll	ll	lm	lm	ll	ll	ll	ll	lm	lm	lm	ll	lm	ll	lm	lm	ll	lm	ll	ll	lm	ll	lm	ll	ll	lm	ll	lm	lm	lm	lm	lm	lm	lm	ll	lm	ll	lm	ll	lm	lm	lm	ll	ll	ll
Marker52333	<nnxnp>	np	nn	nn	nn	np	nn	np	nn	nn	np	nn	nn	nn	nn	nn	np	nn	nn	nn	nn	np	nn	nn	nn	nn	nn	np	nn	np	nn	nn	nn	nn	np	np	nn	nn	nn	nn	nn	np	np	nn	nn	nn	nn	nn	nn
Marker32695	<lmxll>	lm	ll	ll	ll	ll	lm	lm	ll	lm	lm	ll	ll	lm	lm	ll	lm	ll	lm	lm	ll	lm	ll	ll	lm	ll	lm	ll	ll	lm	lm	lm	lm	lm	lm	lm	lm	lm	ll	lm	lm	lm	ll	lm	lm	lm	ll	ll	ll
Marker5669	<lmxll>	ll	lm	lm	lm	lm	ll	ll	lm	ll	ll	lm	lm	ll	ll	lm	ll	lm	ll	ll	lm	ll	lm	lm	ll	lm	ll	lm	lm	ll	ll	ll	ll	ll	ll	ll	ll	ll	lm	ll	ll	ll	lm	ll	lm	ll	lm	lm	lm
Marker33871	<lmxll>	lm	ll	ll	ll	ll	lm	lm	ll	lm	lm	ll	ll	lm	lm	ll	lm	ll	lm	lm	ll	lm	ll	ll	lm	ll	lm	ll	ll	lm	lm	lm	lm	lm	lm	lm	lm	lm	ll	lm	lm	lm	ll	lm	ll	lm	ll	ll	ll
Marker36970	<lmxll>	ll	lm	lm	lm	lm	ll	ll	lm	ll	ll	lm	lm	ll	ll	lm	ll	lm	ll	ll	lm	ll	lm	lm	ll	lm	ll	lm	lm	ll	ll	lm	ll	ll	ll	ll	ll	ll	lm	ll	ll	ll	lm	ll	lm	ll	lm	lm	lm
Marker27316	<nnxnp>	nn	np	np	np	nn	nn	nn	np	nn	nn	np	np	np	nn	nn	np	np	nn	np	np	nn	np	np	np	nn	np	nn	np	nn	nn	nn	nn	np	nn	nn	nn	nn	nn	nn	np	nn	nn	np	nn	np	np	np	np
Marker42960	<lmxll>	ll	lm	lm	lm	lm	ll	lm	lm	ll	ll	lm	lm	ll	ll	lm	ll	lm	ll	ll	lm	ll	lm	lm	ll	lm	ll	lm	lm	ll	ll	lm	ll	ll	ll	ll	ll	ll	lm	ll	ll	ll	lm	ll	lm	ll	lm	lm	lm
Marker18501	<nnxnp>	nn	np	np	np	nn	np	nn	np	np	nn	np	np	nn	np	np	np	np	np	np	np	nn	np	np	np	nn	np	nn	np	nn	np	np	np	np	nn	nn	np	nn	np	np	np	nn	nn	np	nn	np	np	np	np
Marker8748	<nnxnp>	np	nn	nn	nn	np	nn	np	nn	nn	np	nn	nn	np	nn	np	nn	nn	nn	nn	nn	np	nn	nn	np	np	nn	np	nn	np	nn	nn	nn	nn	np	np	nn	np	nn	nn	nn	np	np	nn	np	nn	nn	nn	nn
Marker44344	<nnxnp>	nn	np	np	np	nn	np	nn	np	np	nn	np	np	nn	np	nn	np	np	np	np	np	nn	np	np	nn	nn	np	nn	np	nn	np	np	np	np	nn	nn	np	nn	np	np	np	nn	nn	np	nn	np	np	np	np
Marker33890	<nnxnp>	np	nn	nn	nn	np	nn	np	nn	nn	np	nn	nn	np	nn	np	nn	nn	nn	nn	nn	np	nn	nn	nn	np	nn	np	nn	np	nn	nn	nn	nn	np	nn	nn	np	nn	nn	nn	np	np	nn	np	nn	nn	nn	nn
Marker37141	<nnxnp>	np	nn	nn	nn	np	nn	np	nn	nn	np	nn	nn	np	nn	np	nn	nn	nn	nn	nn	np	nn	nn	nn	np	nn	np	nn	np	nn	nn	nn	nn	np	nn	nn	np	nn	nn	nn	np	np	nn	np	nn	nn	nn	nn
Marker33902	<nnxnp>	np	nn	nn	nn	np	nn	np	nn	np	np	nn	nn	np	nn	np	nn	nn	nn	nn	nn	np	nn	nn	np	np	nn	np	nn	np	nn	nn	nn	nn	np	np	nn	np	nn	nn	nn	nn	np	nn	np	nn	nn	nn	nn
Marker8738	<nnxnp>	np	nn	nn	nn	np	nn	np	nn	np	np	nn	nn	np	nn	np	nn	nn	nn	nn	nn	np	nn	nn	nn	np	nn	np	nn	np	nn	nn	nn	nn	np	np	nn	np	nn	nn	nn	nn	np	nn	np	nn	nn	nn	nn
Marker2929	<lmxll>	lm	ll	ll	ll	ll	lm	lm	ll	ll	lm	ll	ll	lm	lm	ll	lm	ll	lm	lm	ll	lm	ll	ll	lm	ll	lm	ll	ll	ll	lm	lm	ll	lm	lm	ll	lm	lm	ll	lm	lm	lm	ll	lm	ll	lm	ll	ll	ll
Marker3558	<nnxnp>	nn	np	np	np	nn	np	nn	np	nn	nn	np	np	np	np	nn	np	np	nn	np	np	nn	np	np	np	nn	np	nn	np	nn	nn	nn	np	np	nn	nn	nn	nn	nn	np	np	nn	nn	np	nn	np	np	np	np
Marker29201	<lmxll>	ll	lm	lm	lm	lm	ll	lm	lm	lm	ll	lm	lm	ll	ll	lm	ll	lm	ll	ll	lm	ll	lm	lm	ll	lm	ll	lm	lm	lm	ll	ll	lm	ll	ll	lm	ll	ll	lm	ll	ll	ll	lm	ll	lm	ll	lm	lm	lm
Marker43472	<lmxll>	ll	lm	lm	lm	lm	ll	lm	lm	ll	ll	lm	lm	ll	ll	lm	ll	lm	ll	ll	lm	ll	lm	lm	ll	lm	ll	lm	lm	lm	ll	lm	lm	ll	ll	lm	ll	ll	lm	ll	ll	ll	lm	ll	lm	ll	lm	lm	lm
Marker17778	<nnxnp>	nn	np	np	np	nn	np	nn	np	nn	nn	np	np	nn	np	nn	np	np	np	np	np	nn	np	np	np	nn	np	nn	np	nn	np	nn	np	np	nn	nn	nn	nn	np	np	np	np	nn	np	nn	np	np	np	np
Marker33691	<lmxll>	lm	ll	ll	ll	ll	lm	ll	ll	lm	lm	ll	ll	lm	lm	ll	lm	ll	lm	lm	ll	lm	ll	ll	lm	ll	lm	ll	ll	ll	lm	ll	ll	lm	lm	ll	lm	lm	ll	lm	lm	lm	ll	lm	ll	ll	ll	ll	ll
Marker33694	<lmxll>	lm	ll	ll	ll	ll	lm	ll	ll	lm	lm	ll	ll	lm	lm	ll	lm	ll	lm	lm	ll	lm	ll	ll	lm	ll	lm	ll	ll	ll	lm	ll	ll	lm	lm	ll	lm	lm	ll	lm	lm	lm	ll	lm	ll	ll	ll	ll	ll
Marker23390	<nnxnp>	nn	np	nn	np	nn	np	nn	np	nn	nn	np	np	nn	nn	nn	np	np	nn	np	np	nn	np	np	nn	nn	np	nn	np	nn	nn	nn	nn	np	nn	nn	nn	nn	np	nn	nn	nn	nn	np	nn	nn	nn	np	np
Marker72	<efxeg>	ef	eg	eg	ee	ee	fg	ee	--	ef	ef	eg	eg	--	fg	ee	--	eg	fg	--	eg	ef	eg	eg	--	ee	fg	ee	eg	ee	--	--	--	fg	--	--	--	ef	ee	--	fg	ee	ee	fg	ee	ee	--	ee	ee
Marker48052	<nnxnp>	np	nn	nn	nn	np	nn	np	nn	np	np	nn	nn	np	nn	np	nn	nn	nn	nn	nn	np	nn	nn	nn	np	nn	np	nn	np	np	np	nn	nn	np	nn	np	np	nn	nn	nn	np	np	nn	np	nn	nn	nn	nn
Marker36973	<nnxnp>	nn	np	np	np	nn	np	nn	np	nn	nn	np	np	nn	np	nn	np	np	np	np	np	nn	np	np	np	nn	np	nn	np	nn	nn	nn	np	np	nn	np	nn	nn	np	np	np	nn	nn	np	nn	np	np	np	np
Marker14113	<lmxll>	ll	ll	lm	lm	lm	ll	ll	lm	lm	ll	lm	lm	ll	ll	lm	ll	lm	ll	ll	lm	ll	lm	ll	ll	lm	ll	lm	lm	lm	ll	ll	lm	ll	ll	lm	ll	ll	lm	ll	ll	ll	lm	ll	lm	ll	lm	lm	lm
Marker27793	<nnxnp>	nn	np	np	nn	nn	np	nn	np	nn	nn	np	np	nn	np	nn	np	np	np	np	np	nn	np	np	nn	nn	np	nn	np	nn	nn	nn	np	np	nn	nn	nn	nn	np	nn	np	nn	nn	np	nn	np	np	nn	np
Marker10845	<lmxll>	ll	ll	lm	lm	lm	ll	ll	lm	lm	ll	lm	lm	ll	ll	lm	ll	lm	ll	ll	lm	ll	lm	ll	ll	lm	ll	lm	lm	lm	ll	ll	lm	ll	ll	lm	ll	ll	lm	ll	ll	ll	lm	ll	lm	ll	lm	lm	lm
Marker26174	<nnxnp>	nn	np	np	np	nn	np	nn	np	nn	nn	np	np	nn	np	nn	np	np	np	np	np	nn	np	np	nn	nn	np	nn	np	nn	nn	nn	np	np	nn	nn	nn	nn	np	nn	np	nn	nn	np	nn	np	np	nn	np
Marker2935	<efxeg>	ef	eg	eg	eg	ee	fg	ee	eg	ef	ef	eg	eg	ef	--	ee	fg	eg	fg	--	eg	ef	eg	eg	fg	--	fg	ee	eg	ee	ef	ee	eg	--	ef	ee	ef	ef	eg	--	--	ef	ee	fg	ee	ee	eg	eg	--
Marker37540	<nnxnp>	nn	np	np	np	nn	np	nn	np	nn	nn	np	np	nn	np	nn	np	np	np	np	np	nn	np	np	np	nn	np	nn	np	nn	nn	nn	np	np	nn	nn	nn	nn	np	np	np	nn	nn	np	nn	np	np	np	np
Marker26097	<nnxnp>	nn	np	np	np	nn	np	nn	np	nn	nn	np	np	nn	np	nn	np	np	np	np	np	nn	np	np	np	nn	np	nn	np	nn	nn	nn	np	np	nn	nn	nn	nn	np	np	np	nn	nn	np	nn	np	np	np	np
Marker2933	<nnxnp>	np	nn	nn	nn	np	nn	np	nn	np	np	nn	nn	np	nn	np	nn	nn	nn	nn	nn	np	nn	nn	nn	np	nn	np	nn	np	np	np	nn	nn	np	np	np	np	nn	nn	nn	np	np	nn	np	nn	nn	nn	nn
Marker31965	<nnxnp>	nn	np	np	np	nn	np	nn	np	nn	nn	np	np	nn	np	nn	np	np	nn	np	np	nn	np	np	np	nn	np	nn	np	nn	nn	nn	np	np	nn	nn	nn	nn	np	np	np	nn	nn	np	nn	np	np	np	np
Marker5127	<abxcd>	ac	ad	bd	bd	bc	ad	ac	ad	bc	ac	bd	bd	--	ad	bc	ad	bd	ad	ad	bd	ac	bd	ad	ad	bc	ad	bc	ad	bc	ac	ac	bd	--	ac	ac	--	ac	bd	ad	ad	ac	ac	ad	ac	ad	bd	bd	bd
Marker32696	<nnxnp>	nn	np	np	np	nn	np	nn	np	nn	nn	np	np	nn	np	nn	np	np	np	np	np	nn	np	np	np	nn	np	nn	np	nn	nn	nn	np	np	nn	nn	nn	nn	np	np	np	nn	nn	np	nn	nn	np	np	nn
Marker61311	<nnxnp>	nn	np	np	np	nn	np	nn	np	nn	nn	np	np	nn	np	nn	np	np	np	np	np	nn	np	np	np	nn	np	nn	np	nn	nn	nn	np	np	nn	nn	nn	nn	np	np	np	nn	nn	np	nn	nn	np	np	nn
Marker39982	<nnxnp>	nn	np	np	np	nn	np	nn	np	nn	nn	np	np	nn	np	nn	np	np	np	np	np	nn	np	np	np	nn	np	nn	np	nn	nn	nn	np	np	nn	nn	nn	nn	np	np	np	nn	nn	np	nn	nn	np	nn	nn
Marker47100	<nnxnp>	nn	np	np	np	nn	np	nn	np	nn	nn	np	np	nn	np	nn	np	np	np	np	np	nn	np	np	np	nn	np	nn	np	nn	nn	nn	np	np	nn	nn	nn	nn	np	np	np	nn	nn	np	nn	nn	np	nn	nn
Marker15423	<lmxll>	lm	lm	ll	ll	ll	lm	lm	ll	ll	lm	ll	ll	lm	lm	ll	lm	ll	lm	lm	ll	lm	ll	lm	lm	ll	lm	ll	lm	ll	lm	lm	ll	lm	lm	ll	lm	lm	ll	lm	lm	lm	lm	lm	lm	lm	ll	ll	ll
Marker40500	<nnxnp>	nn	np	np	np	nn	np	nn	np	nn	nn	np	np	nn	nn	nn	np	np	nn	np	np	nn	np	np	np	nn	np	nn	np	nn	nn	nn	np	np	nn	nn	nn	nn	np	np	np	nn	nn	np	nn	np	np	np	np
Marker23881	<nnxnp>	nn	np	np	np	nn	np	nn	np	nn	nn	np	np	np	np	nn	np	np	nn	np	np	nn	np	np	np	nn	np	nn	np	nn	nn	nn	np	np	nn	nn	nn	nn	nn	np	np	nn	nn	np	nn	np	np	nn	np
Marker13973	<efxeg>	ee	--	eg	eg	--	ee	--	--	--	ee	eg	eg	ee	--	ee	eg	eg	eg	--	eg	ee	eg	eg	eg	--	eg	--	eg	ee	eg	--	eg	eg	ee	--	--	ee	--	eg	eg	ef	--	--	--	--	--	eg	eg
Marker16678	<abxcd>	bd	ac	--	--	bd	--	--	--	bd	--	--	ac	ad	--	ad	--	--	--	--	bc	--	--	ac	bc	--	bc	--	--	--	bd	bd	--	bc	bd	bd	--	--	--	bd	--	--	--	--	--	bd	ad	bc	bc
Marker34315	<nnxnp>	np	np	nn	np	nn	np	nn	np	nn	nn	np	np	nn	nn	nn	np	np	nn	np	np	nn	np	np	nn	nn	np	nn	np	nn	nn	nn	nn	np	nn	nn	nn	nn	np	nn	nn	nn	nn	np	nn	nn	nn	np	np
Marker36488	<nnxnp>	np	np	nn	np	nn	np	nn	np	nn	nn	np	np	nn	nn	nn	np	np	nn	nn	np	nn	np	np	nn	nn	np	nn	np	nn	nn	nn	np	np	nn	nn	nn	nn	np	nn	nn	nn	nn	np	nn	nn	nn	np	np
Marker36503	<efxeg>	ee	eg	--	eg	ef	--	ef	eg	ee	ee	--	ef	ee	ee	--	ee	fg	ee	ee	fg	ee	--	eg	--	ee	fg	--	ee	ee	ee	ef	--	eg	--	ef	ee	ee	--	ee	eg	--	--	fg	ee	--	fg	--	--
Marker29090	<nnxnp>	np	nn	nn	nn	np	nn	np	nn	np	np	nn	np	np	np	np	nn	nn	np	np	nn	np	nn	nn	nn	np	nn	np	nn	np	np	np	nn	nn	np	np	np	np	nn	nn	nn	np	np	nn	np	np	nn	nn	nn
Marker61167	<nnxnp>	nn	np	np	np	nn	np	nn	np	nn	nn	np	nn	nn	nn	nn	np	np	nn	nn	np	nn	np	np	np	nn	np	nn	np	nn	nn	nn	np	np	nn	nn	nn	nn	np	np	np	nn	nn	np	nn	nn	np	np	np
Marker11793	<lmxll>	ll	lm	ll	lm	ll	lm	ll	lm	lm	lm	ll	ll	lm	lm	ll	ll	ll	lm	lm	ll	lm	ll	lm	ll	lm	ll	lm	lm	lm	lm	lm	lm	lm	lm	ll	lm	lm	ll	lm	lm	lm	lm	ll	ll	ll	ll	ll	lm
Marker12438	<efxeg>	ee	eg	eg	--	ee	--	ee	--	ee	--	ee	ef	ee	--	ee	--	--	ee	ee	eg	ee	--	eg	eg	--	eg	ee	eg	ee	--	--	eg	eg	--	ee	--	--	--	--	--	--	--	--	--	--	--	--	--
Marker31802	<efxeg>	ee	--	eg	--	ee	ef	ee	eg	ef	ef	eg	eg	ef	ef	--	fg	eg	ef	--	eg	ef	eg	--	ef	ef	eg	ef	--	ee	ef	--	ee	--	ee	--	ef	ef	eg	--	ef	ef	ef	eg	ee	ee	ee	eg	--
Marker31786	<efxeg>	ee	--	eg	--	ee	--	ee	--	ef	ef	eg	eg	ef	ef	ee	fg	eg	ef	--	eg	ef	eg	--	ef	ef	eg	ef	--	ee	ef	--	ee	--	--	ee	ef	ef	eg	ef	ef	ef	ef	eg	ee	ee	--	eg	--
Marker31798	<efxeg>	ee	--	eg	--	ee	ef	ee	--	ef	ef	eg	eg	ef	ef	--	--	eg	ef	--	eg	--	eg	--	ef	ef	eg	ef	--	ee	ef	--	ee	--	ee	ee	ef	ef	eg	ef	ef	ef	ef	eg	ee	ee	ee	eg	--
Marker31790	<efxeg>	--	--	eg	--	ee	--	ee	--	ef	ef	eg	eg	ef	ef	--	fg	eg	ef	--	eg	ef	eg	--	--	ef	eg	ef	--	ee	ef	--	ee	--	--	ee	ef	ef	eg	--	ef	ef	ef	eg	ee	--	--	eg	--
Marker5632	<lmxll>	lm	ll	lm	ll	lm	ll	lm	ll	ll	ll	lm	lm	ll	ll	lm	ll	ll	ll	ll	lm	ll	lm	ll	lm	ll	lm	ll	ll	lm	ll	lm	lm	ll	ll	lm	lm	ll	lm	lm	ll	ll	ll	lm	lm	lm	lm	lm	ll
Marker24801	<lmxll>	ll	lm	ll	lm	ll	lm	ll	lm	lm	lm	ll	ll	lm	lm	lm	lm	ll	lm	lm	ll	lm	ll	lm	ll	lm	ll	lm	lm	ll	lm	ll	ll	lm	lm	ll	ll	lm	ll	ll	lm	lm	lm	ll	ll	ll	ll	ll	lm
Marker39194	<nnxnp>	nn	np	np	np	nn	np	nn	np	nn	nn	np	nn	nn	nn	nn	nn	np	nn	nn	np	nn	np	np	np	nn	np	nn	np	nn	nn	nn	np	np	nn	nn	nn	nn	np	nn	nn	nn	nn	np	nn	nn	nn	np	np
Marker39524	<nnxnp>	nn	np	np	np	nn	np	nn	np	nn	nn	nn	nn	nn	nn	nn	nn	np	nn	nn	np	nn	np	np	np	nn	np	nn	np	nn	nn	nn	np	np	nn	nn	nn	nn	np	nn	nn	nn	nn	np	nn	nn	nn	np	np
Marker13790	<efxeg>	ee	fg	eg	fg	ee	fg	ee	--	ef	ef	eg	ee	ef	ef	--	--	eg	ef	ef	eg	ef	eg	fg	--	ef	eg	ef	fg	ee	ef	ee	eg	fg	--	ee	ee	--	--	--	fg	--	--	--	ee	ee	ee	--	fg
Marker16806	<nnxnp>	nn	np	np	np	nn	np	nn	np	nn	nn	np	nn	nn	nn	nn	np	np	nn	nn	np	nn	np	np	np	nn	np	nn	np	nn	nn	nn	np	np	nn	nn	nn	nn	np	np	np	nn	np	np	nn	nn	np	np	nn
Marker17369	<nnxnp>	nn	np	np	np	nn	np	nn	np	nn	nn	np	nn	nn	nn	nn	np	np	nn	nn	np	nn	np	np	np	nn	np	nn	np	nn	nn	nn	np	np	nn	nn	nn	nn	np	np	np	nn	np	np	nn	nn	np	np	nn
Marker21863	<lmxll>	ll	lm	ll	lm	ll	lm	ll	lm	lm	lm	ll	ll	lm	lm	ll	lm	ll	lm	lm	ll	lm	ll	lm	ll	lm	ll	lm	lm	ll	lm	lm	lm	lm	lm	ll	lm	lm	lm	lm	lm	lm	lm	ll	ll	ll	lm	ll	lm
Marker4284	<lmxll>	ll	lm	ll	lm	ll	lm	ll	lm	lm	lm	ll	ll	lm	lm	ll	lm	ll	lm	lm	ll	lm	ll	lm	ll	lm	ll	lm	lm	ll	lm	lm	ll	lm	lm	ll	lm	lm	lm	lm	lm	lm	lm	ll	ll	ll	lm	ll	lm
Marker12430	<nnxnp>	nn	np	np	np	nn	np	nn	np	nn	nn	np	nn	nn	nn	nn	np	np	nn	nn	np	nn	np	np	np	nn	np	nn	np	nn	nn	nn	np	np	nn	nn	nn	nn	np	nn	np	nn	np	np	nn	np	nn	np	np
Marker26962	<lmxll>	lm	ll	lm	ll	lm	ll	lm	ll	ll	ll	lm	lm	ll	ll	lm	lm	lm	ll	ll	lm	ll	lm	ll	lm	ll	lm	ll	ll	lm	ll	ll	ll	ll	ll	lm	ll	ll	lm	ll	ll	ll	ll	lm	lm	lm	lm	lm	ll
Marker13780	<nnxnp>	nn	np	np	np	nn	np	nn	np	nn	nn	np	nn	nn	nn	nn	np	np	nn	nn	np	nn	np	np	np	nn	np	nn	np	nn	nn	nn	np	np	nn	nn	nn	nn	np	nn	np	nn	np	np	nn	np	nn	np	np
Marker8852	<lmxll>	ll	lm	ll	lm	ll	lm	ll	lm	lm	lm	ll	ll	lm	lm	ll	lm	ll	lm	lm	ll	lm	ll	lm	ll	lm	ll	lm	lm	ll	lm	lm	lm	lm	lm	ll	lm	lm	ll	lm	lm	lm	lm	ll	ll	ll	ll	ll	lm
Marker36498	<lmxll>	lm	ll	lm	ll	lm	ll	lm	ll	ll	ll	lm	lm	ll	ll	lm	ll	lm	ll	ll	lm	ll	lm	ll	lm	ll	lm	ll	ll	lm	ll	ll	lm	ll	ll	lm	ll	ll	lm	ll	ll	ll	ll	ll	lm	lm	lm	lm	ll
Marker25409	<abxcd>	--	ac	ac	ac	ad	--	ad	--	ad	ad	ac	ac	--	ad	ad	--	ac	--	ad	ac	--	--	ac	--	ad	ac	--	ac	--	ad	--	--	--	--	ad	--	--	--	--	--	--	--	--	--	--	--	--	--
Marker31383	<lmxll>	ll	lm	ll	lm	ll	lm	ll	lm	lm	lm	ll	ll	lm	lm	ll	lm	ll	lm	lm	ll	lm	ll	lm	ll	lm	ll	lm	lm	ll	lm	lm	lm	lm	lm	ll	lm	lm	ll	lm	lm	lm	lm	ll	ll	ll	ll	ll	lm
Marker24156	<lmxll>	lm	ll	lm	ll	lm	ll	lm	ll	ll	ll	lm	lm	ll	ll	lm	ll	lm	ll	ll	lm	ll	lm	ll	lm	ll	lm	ll	ll	lm	ll	ll	ll	ll	ll	lm	ll	ll	lm	ll	ll	ll	ll	lm	lm	lm	lm	lm	ll
Marker33390	<lmxll>	lm	ll	lm	ll	lm	ll	lm	ll	ll	ll	lm	lm	ll	ll	lm	ll	lm	ll	ll	lm	ll	lm	ll	lm	ll	lm	ll	ll	lm	ll	ll	ll	ll	ll	lm	ll	ll	lm	ll	ll	ll	ll	lm	lm	lm	lm	lm	ll
Marker40751	<abxcd>	bd	ac	bc	ac	--	ad	bd	ac	ad	ad	bc	bc	ad	ad	bd	ad	bc	ad	ac	bc	ad	bc	ac	ac	--	bc	ad	ac	bd	ad	--	--	ac	ad	bd	--	--	--	--	ad	--	--	ac	--	--	--	bd	ad
Marker25425	<lmxll>	lm	ll	lm	ll	lm	ll	lm	ll	ll	ll	lm	lm	ll	ll	lm	lm	lm	ll	ll	lm	ll	lm	ll	lm	ll	lm	ll	ll	lm	ll	ll	ll	ll	ll	lm	ll	ll	lm	ll	ll	ll	ll	lm	lm	lm	lm	lm	ll
Marker40755	<lmxll>	ll	lm	ll	lm	ll	lm	ll	lm	lm	lm	ll	ll	lm	lm	ll	ll	ll	lm	lm	ll	lm	ll	lm	ll	lm	ll	lm	lm	ll	lm	lm	ll	lm	lm	ll	lm	lm	ll	lm	lm	lm	lm	ll	ll	ll	ll	ll	lm
Marker11625	<lmxll>	ll	lm	ll	lm	ll	lm	ll	lm	lm	lm	ll	ll	lm	lm	ll	ll	ll	lm	lm	ll	lm	ll	lm	ll	lm	ll	lm	lm	ll	lm	lm	ll	lm	lm	ll	lm	lm	ll	lm	lm	lm	lm	ll	ll	ll	ll	ll	lm
Marker38955	<lmxll>	lm	ll	lm	ll	lm	ll	lm	ll	ll	ll	lm	lm	ll	ll	lm	lm	lm	ll	ll	lm	ll	lm	ll	lm	ll	lm	ll	ll	lm	ll	ll	lm	ll	ll	lm	ll	ll	lm	ll	ll	ll	ll	lm	lm	lm	lm	lm	ll
Marker60196	<nnxnp>	nn	np	np	np	nn	np	nn	np	nn	nn	nn	nn	nn	nn	nn	np	np	nn	nn	np	nn	np	np	np	nn	np	nn	np	nn	nn	nn	np	np	nn	nn	nn	nn	np	np	np	nn	np	np	nn	np	np	np	np
Marker25296	<lmxll>	lm	ll	lm	ll	lm	ll	lm	ll	ll	ll	lm	lm	ll	ll	lm	ll	lm	ll	ll	lm	ll	lm	ll	lm	ll	lm	ll	ll	lm	ll	ll	lm	ll	ll	lm	ll	ll	lm	ll	ll	ll	ll	lm	ll	lm	lm	lm	ll
Marker25802	<lmxll>	ll	lm	ll	lm	ll	lm	ll	lm	lm	lm	ll	ll	lm	lm	ll	lm	ll	lm	lm	ll	lm	ll	lm	ll	lm	ll	lm	lm	ll	lm	lm	ll	lm	lm	ll	lm	lm	ll	lm	lm	lm	lm	ll	lm	ll	ll	ll	lm
Marker29038	<abxcd>	ac	bd	--	bd	ac	bd	--	--	bc	bc	ad	ac	bc	bc	ac	bd	ad	bc	bc	ad	bc	ad	bd	ad	bc	ad	bc	bd	ac	bc	bc	ad	bd	bc	ac	--	bc	ad	bd	bd	bc	bd	ad	bd	ad	ad	ad	bd
Marker10467	<lmxll>	ll	lm	ll	lm	ll	ll	ll	lm	lm	lm	ll	ll	lm	lm	ll	lm	ll	lm	lm	ll	lm	ll	lm	ll	lm	ll	lm	lm	ll	lm	lm	ll	lm	lm	ll	lm	lm	ll	lm	lm	lm	lm	ll	lm	ll	ll	ll	lm
Marker28785	<lmxll>	ll	lm	ll	lm	ll	ll	ll	lm	lm	lm	ll	ll	lm	lm	ll	lm	ll	lm	lm	ll	lm	ll	lm	ll	lm	ll	lm	lm	ll	lm	lm	ll	lm	lm	ll	lm	lm	ll	lm	lm	lm	lm	ll	lm	ll	ll	ll	lm
Marker10345	<lmxll>	lm	ll	lm	ll	lm	ll	lm	ll	ll	ll	lm	lm	ll	ll	lm	ll	lm	ll	ll	lm	ll	lm	ll	lm	ll	lm	ll	ll	lm	ll	ll	lm	ll	ll	lm	ll	ll	lm	ll	ll	ll	ll	ll	lm	lm	lm	lm	ll
Marker53261	<nnxnp>	nn	np	np	np	nn	np	nn	np	nn	nn	nn	nn	nn	nn	nn	np	np	nn	nn	np	nn	np	np	np	nn	np	nn	np	nn	nn	np	np	np	np	nn	nn	nn	np	np	np	nn	np	np	nn	np	np	np	np
Marker614	<lmxll>	lm	ll	lm	ll	lm	lm	lm	ll	ll	ll	lm	lm	ll	ll	lm	ll	lm	ll	ll	lm	ll	lm	ll	ll	ll	lm	ll	ll	lm	ll	ll	lm	ll	ll	lm	ll	ll	lm	ll	ll	ll	ll	lm	lm	lm	lm	lm	ll
Marker25413	<lmxll>	lm	ll	lm	ll	lm	lm	lm	ll	ll	ll	lm	lm	ll	ll	lm	ll	lm	ll	ll	lm	ll	lm	ll	ll	ll	lm	ll	ll	lm	ll	ll	lm	ll	ll	lm	ll	ll	lm	ll	ll	ll	ll	lm	lm	lm	lm	lm	ll
Marker36500	<abxcd>	ad	bd	ad	bd	ac	--	ac	bd	bc	bc	ad	ac	bd	bc	ac	--	ad	bc	bc	--	--	ac	bd	--	bc	ad	bc	bc	ac	--	--	--	bc	--	--	bc	bc	ad	--	bd	bd	--	--	ad	--	ad	ad	bd
Marker8854	<lmxll>	lm	ll	lm	ll	lm	ll	lm	ll	ll	ll	lm	lm	ll	ll	lm	ll	lm	ll	ll	lm	ll	lm	ll	ll	ll	lm	ll	ll	lm	ll	ll	lm	ll	ll	lm	ll	ll	lm	ll	ll	ll	ll	lm	lm	lm	lm	lm	ll
Marker12525	<lmxll>	lm	ll	lm	ll	lm	ll	lm	ll	ll	ll	lm	lm	ll	ll	lm	ll	lm	ll	ll	lm	ll	lm	ll	ll	ll	lm	ll	ll	lm	ll	ll	lm	ll	ll	lm	ll	ll	lm	ll	ll	ll	ll	ll	lm	lm	lm	lm	ll
Marker19247	<nnxnp>	np	nn	nn	nn	np	nn	np	nn	np	np	np	np	np	np	np	nn	nn	np	np	nn	np	nn	nn	nn	np	nn	np	nn	np	np	nn	nn	nn	nn	np	np	np	nn	nn	nn	np	nn	nn	nn	nn	nn	nn	nn
Marker19240	<lmxll>	lm	ll	lm	ll	lm	ll	lm	ll	ll	ll	lm	lm	ll	ll	lm	ll	lm	ll	ll	lm	ll	lm	ll	ll	ll	lm	ll	ll	lm	ll	ll	lm	ll	ll	lm	ll	ll	lm	ll	ll	ll	ll	lm	lm	lm	lm	lm	ll
Marker34343	<nnxnp>	np	nn	nn	nn	np	nn	np	nn	np	np	np	np	np	np	np	nn	nn	np	np	nn	np	nn	nn	nn	np	nn	np	nn	np	np	nn	nn	nn	nn	np	np	np	nn	nn	nn	np	nn	nn	nn	nn	nn	nn	nn
Marker25908	<lmxll>	lm	ll	lm	ll	lm	ll	lm	ll	ll	ll	lm	lm	ll	ll	lm	ll	lm	ll	ll	lm	ll	lm	ll	ll	ll	lm	ll	ll	lm	ll	ll	lm	ll	ll	lm	ll	ll	lm	ll	ll	ll	ll	lm	lm	lm	lm	lm	ll
Marker5617	<lmxll>	lm	ll	lm	ll	lm	ll	lm	ll	ll	ll	lm	lm	ll	ll	lm	ll	lm	ll	ll	lm	ll	lm	ll	ll	ll	lm	ll	ll	lm	ll	ll	lm	ll	ll	lm	ll	ll	lm	ll	ll	ll	ll	lm	lm	lm	lm	lm	ll
Marker34483	<lmxll>	ll	lm	ll	lm	ll	lm	ll	lm	lm	lm	ll	ll	lm	lm	ll	lm	ll	lm	lm	ll	lm	ll	lm	lm	lm	ll	lm	lm	ll	lm	lm	ll	lm	lm	ll	lm	lm	ll	lm	lm	lm	lm	ll	ll	ll	ll	ll	lm
Marker12526	<nnxnp>	np	nn	nn	nn	np	nn	np	nn	np	np	np	np	np	np	np	nn	nn	np	np	nn	np	nn	nn	nn	np	nn	np	nn	np	np	nn	nn	nn	nn	np	np	np	nn	nn	nn	np	nn	nn	nn	nn	nn	nn	nn
Marker34314	<nnxnp>	np	nn	nn	nn	np	nn	np	nn	np	np	np	np	np	np	np	nn	nn	np	np	nn	np	nn	nn	nn	np	nn	np	nn	np	np	nn	nn	nn	nn	np	np	np	nn	nn	nn	np	nn	nn	nn	nn	nn	nn	nn
Marker5614	<abxcd>	--	ad	bd	--	--	ad	--	ad	--	--	bd	bd	--	--	--	ad	bd	--	ad	bd	--	bd	--	--	--	bd	--	ad	--	--	--	bd	ad	--	--	--	--	bd	ad	ad	--	--	bd	--	bd	--	bd	--
Marker13297	<lmxll>	ll	lm	ll	lm	ll	lm	ll	lm	lm	lm	ll	ll	lm	lm	ll	lm	ll	lm	lm	ll	lm	ll	lm	lm	lm	ll	lm	lm	ll	lm	lm	ll	lm	lm	ll	lm	lm	ll	lm	lm	lm	lm	ll	ll	ll	ll	ll	lm
Marker36480	<lmxll>	lm	ll	lm	ll	lm	ll	lm	ll	ll	ll	lm	lm	ll	ll	lm	ll	lm	ll	ll	lm	ll	lm	ll	ll	ll	lm	ll	ll	lm	ll	ll	lm	ll	ll	lm	ll	ll	lm	ll	ll	ll	ll	lm	lm	lm	lm	lm	ll
Marker12313	<lmxll>	lm	ll	lm	ll	lm	ll	lm	ll	ll	ll	lm	lm	ll	ll	lm	ll	lm	ll	ll	lm	ll	lm	ll	ll	ll	lm	ll	ll	lm	ll	ll	lm	ll	ll	lm	ll	ll	lm	ll	ll	ll	ll	lm	lm	lm	lm	lm	ll
Marker35218	<lmxll>	ll	lm	ll	lm	ll	lm	ll	ll	lm	lm	ll	ll	lm	lm	ll	lm	ll	lm	lm	ll	lm	ll	lm	lm	lm	ll	lm	lm	ll	lm	lm	ll	lm	lm	lm	lm	lm	ll	lm	lm	lm	lm	ll	ll	ll	ll	ll	lm
Marker11799	<abxcd>	ac	bd	ad	bd	ac	bd	ac	bd	bc	bc	ac	ac	bc	bc	ac	--	ad	bc	bc	ad	bc	ad	bd	--	bc	ad	bc	bd	--	bc	--	ad	bd	bd	--	--	bc	ad	bd	bd	bc	bd	ad	--	ad	ad	ad	--
Marker25236	<lmxll>	lm	ll	lm	ll	lm	ll	lm	ll	ll	ll	lm	lm	ll	ll	lm	ll	lm	ll	ll	lm	ll	lm	ll	ll	ll	lm	ll	ll	lm	ll	ll	lm	ll	ll	lm	ll	ll	ll	ll	ll	ll	ll	lm	lm	lm	lm	lm	ll
Marker28784	<lmxll>	ll	lm	ll	lm	ll	lm	ll	lm	lm	lm	ll	ll	lm	lm	ll	lm	ll	lm	lm	ll	lm	ll	lm	lm	lm	ll	lm	lm	ll	lm	lm	ll	lm	lm	ll	lm	lm	lm	lm	lm	lm	lm	ll	ll	ll	ll	ll	lm
Marker33450	<lmxll>	ll	lm	ll	lm	ll	lm	ll	lm	lm	lm	ll	ll	lm	lm	ll	lm	ll	lm	lm	ll	lm	ll	lm	lm	lm	ll	lm	lm	ll	lm	lm	ll	lm	lm	ll	lm	lm	lm	lm	lm	lm	lm	ll	ll	ll	ll	ll	lm
Marker26638	<lmxll>	lm	ll	lm	ll	lm	ll	lm	ll	ll	ll	lm	lm	ll	ll	lm	ll	lm	ll	ll	lm	ll	lm	ll	ll	ll	lm	ll	ll	lm	ll	ll	lm	ll	ll	ll	ll	ll	ll	ll	ll	ll	ll	lm	lm	lm	lm	lm	ll
Marker17707	<lmxll>	lm	ll	lm	ll	lm	ll	lm	ll	ll	ll	lm	lm	ll	ll	lm	ll	lm	ll	ll	lm	ll	lm	ll	ll	ll	lm	ll	ll	lm	ll	ll	lm	ll	ll	ll	ll	ll	ll	ll	ll	ll	ll	lm	lm	lm	lm	lm	ll
Marker15154	<nnxnp>	np	np	nn	nn	np	nn	np	nn	np	np	np	np	np	np	np	nn	nn	np	np	nn	np	nn	nn	nn	np	nn	np	nn	np	np	nn	nn	nn	np	np	np	np	nn	nn	nn	np	nn	nn	np	nn	nn	nn	nn
Marker31354	<lmxll>	ll	lm	ll	lm	ll	lm	ll	lm	lm	lm	ll	ll	lm	lm	ll	lm	ll	lm	lm	ll	lm	ll	lm	lm	lm	ll	lm	lm	ll	lm	lm	ll	lm	lm	ll	lm	lm	ll	lm	lm	lm	lm	ll	ll	ll	ll	ll	lm
Marker18848	<lmxll>	ll	lm	ll	lm	ll	lm	ll	lm	lm	lm	ll	ll	lm	lm	ll	lm	ll	lm	lm	ll	lm	ll	lm	lm	lm	ll	lm	lm	ll	lm	lm	ll	lm	lm	ll	lm	lm	ll	lm	lm	lm	lm	ll	ll	ll	ll	ll	lm
Marker27679	<lmxll>	ll	lm	ll	lm	ll	lm	ll	lm	lm	lm	ll	ll	lm	lm	ll	lm	lm	lm	lm	ll	lm	ll	lm	ll	lm	ll	lm	lm	ll	lm	ll	ll	lm	lm	ll	ll	lm	ll	lm	lm	lm	lm	ll	ll	ll	ll	ll	lm
Marker10350	<abxcd>	ac	bd	ad	bd	ac	bd	ac	ad	bc	bc	ac	--	bc	bc	ac	ad	ad	bc	bc	ad	ac	ad	ad	ad	bc	ad	bc	bd	ac	bc	--	ad	bd	bc	ac	bc	bc	--	ad	--	--	bd	--	ac	--	--	ad	ad
Marker19123	<lmxll>	ll	lm	ll	lm	ll	lm	ll	lm	lm	lm	ll	ll	lm	lm	ll	lm	ll	lm	lm	ll	lm	ll	lm	lm	lm	ll	lm	lm	ll	lm	lm	ll	lm	lm	ll	lm	lm	ll	lm	lm	lm	lm	ll	ll	ll	ll	ll	lm
Marker2099	<lmxll>	lm	ll	lm	ll	lm	ll	lm	ll	ll	ll	lm	lm	ll	ll	lm	ll	lm	ll	ll	lm	ll	lm	ll	ll	ll	lm	ll	ll	lm	ll	ll	lm	ll	ll	lm	ll	ll	lm	ll	ll	ll	ll	lm	lm	lm	lm	lm	ll
Marker28194	<lmxll>	lm	ll	lm	ll	lm	ll	lm	ll	ll	ll	lm	lm	ll	ll	lm	ll	lm	ll	ll	lm	ll	lm	ll	ll	ll	lm	ll	ll	lm	ll	ll	lm	ll	ll	lm	ll	ll	lm	ll	ll	ll	ll	lm	lm	lm	lm	lm	ll
Marker13883	<nnxnp>	nn	nn	np	nn	nn	np	nn	np	nn	nn	nn	nn	nn	nn	nn	np	np	nn	nn	np	nn	np	np	np	nn	np	nn	np	nn	nn	np	np	np	nn	nn	nn	nn	np	np	np	nn	np	np	nn	nn	np	np	np
Marker21924	<lmxll>	ll	lm	ll	lm	ll	lm	ll	lm	lm	lm	ll	ll	lm	lm	ll	lm	ll	lm	lm	ll	lm	ll	lm	lm	lm	ll	lm	ll	ll	lm	lm	ll	lm	lm	ll	lm	lm	ll	lm	lm	lm	lm	ll	ll	ll	ll	ll	lm
Marker33443	<lmxll>	ll	lm	ll	lm	ll	lm	ll	lm	lm	lm	ll	ll	lm	lm	ll	lm	ll	lm	lm	ll	lm	ll	lm	lm	lm	ll	lm	ll	ll	lm	lm	ll	lm	lm	ll	lm	lm	ll	lm	lm	lm	lm	ll	ll	ll	ll	ll	lm
Marker23725	<nnxnp>	np	np	nn	np	np	nn	np	nn	np	np	np	np	np	np	np	nn	nn	np	np	nn	np	nn	nn	nn	np	nn	np	nn	np	np	nn	nn	nn	np	np	np	np	nn	nn	nn	np	nn	nn	np	np	nn	nn	nn
Marker26542	<efxeg>	ee	eg	eg	eg	ee	--	ee	--	ee	--	ee	ef	--	--	ee	ee	--	ee	ee	eg	ef	eg	eg	eg	--	eg	ee	--	--	--	--	eg	eg	--	ee	--	--	--	--	--	--	--	--	--	--	--	--	--
Marker34804	<lmxll>	lm	ll	lm	ll	lm	ll	lm	lm	ll	ll	lm	lm	ll	ll	ll	ll	lm	ll	ll	lm	ll	lm	ll	ll	ll	lm	ll	ll	lm	ll	ll	lm	ll	lm	lm	ll	ll	lm	ll	ll	ll	ll	lm	lm	lm	lm	lm	ll
Marker34799	<nnxnp>	np	np	nn	np	np	nn	np	nn	np	np	np	np	np	np	np	nn	nn	np	np	nn	np	nn	nn	nn	np	nn	np	nn	np	np	nn	nn	nn	np	np	np	np	nn	nn	nn	np	nn	nn	np	np	nn	nn	nn
Marker3412	<nnxnp>	np	np	nn	np	np	nn	np	nn	np	np	np	np	np	np	np	nn	nn	np	np	nn	np	nn	nn	nn	np	nn	np	nn	np	np	nn	nn	nn	np	np	np	np	nn	nn	nn	np	nn	nn	np	np	nn	nn	nn
Marker38950	<lmxll>	lm	ll	lm	ll	lm	ll	lm	lm	ll	ll	lm	lm	ll	ll	lm	lm	lm	ll	ll	lm	ll	lm	ll	lm	ll	lm	ll	lm	lm	lm	ll	lm	ll	ll	lm	ll	ll	lm	lm	lm	ll	lm	lm	lm	lm	lm	lm	ll
Marker15137	<lmxll>	lm	ll	lm	ll	lm	lm	lm	lm	ll	ll	lm	lm	ll	ll	lm	ll	ll	ll	ll	lm	ll	lm	ll	lm	ll	lm	ll	ll	lm	lm	ll	lm	ll	lm	lm	ll	ll	lm	ll	lm	ll	lm	lm	lm	lm	lm	lm	ll
Marker25246	<nnxnp>	np	np	nn	nn	nn	nn	np	nn	np	np	np	np	np	np	np	nn	nn	np	np	nn	nn	nn	nn	nn	np	nn	np	nn	np	np	nn	nn	nn	np	np	np	np	nn	np	nn	np	nn	nn	np	np	np	nn	nn
Marker10335	<lmxll>	lm	ll	lm	ll	lm	lm	lm	lm	ll	ll	lm	lm	ll	ll	lm	ll	lm	ll	ll	lm	ll	lm	ll	lm	ll	lm	lm	ll	lm	lm	ll	lm	ll	lm	lm	ll	ll	lm	ll	lm	ll	lm	lm	lm	lm	lm	lm	ll
Marker19293	<lmxll>	ll	lm	ll	lm	ll	ll	ll	ll	lm	lm	ll	ll	lm	lm	ll	ll	lm	lm	lm	ll	lm	ll	lm	ll	lm	ll	lm	ll	ll	ll	lm	ll	lm	ll	ll	lm	lm	ll	ll	ll	lm	ll	ll	ll	ll	ll	ll	lm
Marker19385	<nnxnp>	nn	nn	np	np	nn	nn	nn	np	nn	nn	nn	nn	nn	nn	nn	nn	np	nn	nn	np	np	np	nn	np	nn	np	nn	np	nn	nn	np	np	np	nn	nn	nn	nn	np	nn	np	nn	np	np	nn	nn	nn	np	np
Marker19803	<nnxnp>	nn	nn	np	np	nn	nn	nn	np	nn	nn	nn	nn	nn	nn	nn	nn	np	nn	nn	np	np	np	nn	np	nn	np	nn	np	nn	nn	np	np	np	nn	nn	nn	nn	np	nn	np	nn	np	np	nn	nn	nn	np	np
Marker31960	<lmxll>	ll	lm	ll	lm	ll	ll	lm	ll	lm	lm	ll	ll	lm	lm	ll	lm	ll	lm	lm	ll	lm	ll	lm	lm	lm	ll	ll	lm	ll	ll	lm	ll	lm	ll	ll	lm	ll	ll	lm	ll	lm	ll	ll	ll	ll	ll	ll	lm
Marker13841	<lmxll>	lm	ll	lm	ll	ll	lm	ll	lm	ll	ll	lm	ll	ll	ll	lm	lm	lm	ll	ll	lm	ll	lm	ll	ll	ll	lm	lm	ll	lm	lm	ll	lm	lm	lm	lm	ll	lm	lm	ll	lm	ll	lm	lm	lm	lm	lm	lm	ll
Marker21881	<lmxll>	lm	ll	ll	ll	ll	ll	lm	lm	lm	lm	ll	ll	ll	ll	ll	lm	lm	lm	ll	lm	ll	ll	lm	ll	ll	lm	lm	ll	ll	ll	lm	ll	lm	lm	ll	ll	ll	ll	ll	ll	ll	lm	ll	lm	ll	ll	ll	ll
Marker20588	<lmxll>	lm	ll	ll	ll	ll	ll	lm	lm	ll	lm	ll	ll	ll	ll	ll	lm	lm	lm	lm	lm	ll	ll	lm	ll	ll	lm	lm	ll	ll	ll	lm	ll	lm	lm	lm	ll	ll	lm	ll	lm	ll	lm	ll	lm	ll	ll	ll	ll
Marker4124	<lmxll>	lm	ll	lm	ll	lm	ll	lm	lm	lm	ll	ll	ll	ll	ll	ll	lm	lm	lm	lm	lm	ll	ll	ll	ll	ll	ll	lm	ll	ll	ll	lm	ll	lm	lm	lm	ll	ll	lm	ll	lm	ll	lm	ll	lm	ll	ll	ll	ll
Marker42421	<lmxll>	lm	ll	lm	ll	lm	lm	lm	lm	lm	ll	lm	lm	ll	ll	lm	lm	lm	lm	lm	lm	ll	ll	ll	lm	ll	lm	lm	lm	lm	lm	lm	lm	lm	ll	lm	lm	lm	lm	lm	lm	lm	lm	ll	lm	ll	ll	ll	ll
Marker26131	<lmxll>	ll	lm	ll	lm	ll	lm	ll	ll	ll	lm	ll	ll	lm	lm	lm	ll	ll	ll	ll	ll	lm	lm	lm	ll	lm	ll	ll	ll	ll	ll	ll	ll	ll	lm	ll	ll	lm	ll	ll	ll	ll	ll	lm	ll	lm	lm	lm	lm
Marker37487	<lmxll>	ll	lm	ll	lm	ll	lm	ll	ll	ll	lm	ll	lm	lm	lm	lm	ll	ll	ll	ll	ll	lm	lm	lm	lm	lm	ll	ll	lm	lm	ll	ll	ll	ll	ll	ll	lm	lm	ll	lm	ll	ll	ll	lm	ll	lm	lm	lm	lm
Marker35464	<lmxll>	lm	ll	lm	ll	lm	ll	lm	lm	lm	ll	lm	lm	ll	ll	ll	lm	lm	lm	lm	lm	ll	ll	ll	lm	ll	ll	lm	ll	ll	lm	lm	lm	lm	lm	lm	ll	ll	lm	lm	lm	lm	lm	ll	ll	ll	ll	ll	ll
Marker28322	<lmxll>	lm	ll	lm	ll	lm	ll	lm	lm	lm	ll	lm	ll	ll	ll	ll	lm	lm	lm	lm	lm	ll	ll	ll	ll	ll	lm	lm	ll	lm	lm	lm	lm	lm	lm	ll	ll	ll	lm	ll	lm	lm	lm	ll	ll	ll	ll	ll	ll
Marker4154	<nnxnp>	nn	nn	np	np	np	nn	nn	nn	nn	np	np	np	nn	nn	nn	nn	np	nn	np	nn	nn	np	nn	np	nn	np	nn	np	nn	nn	nn	nn	nn	nn	np	np	nn	nn	np	nn	np	nn	np	np	np	nn	nn	np
Marker37472	<lmxll>	lm	ll	lm	ll	lm	ll	lm	lm	lm	ll	lm	ll	ll	ll	ll	lm	lm	lm	lm	lm	ll	ll	ll	ll	ll	lm	lm	ll	lm	lm	lm	lm	lm	lm	ll	ll	lm	lm	ll	lm	lm	lm	ll	ll	ll	ll	ll	ll
Marker4167	<efxeg>	fg	eg	ef	ee	ef	--	fg	eg	fg	ee	ef	--	eg	eg	eg	--	ef	fg	ef	fg	eg	ee	eg	ee	eg	ef	fg	ee	fg	fg	--	fg	fg	fg	ee	--	eg	--	ee	--	--	--	ee	--	--	eg	--	--
Marker40091	<lmxll>	lm	ll	lm	ll	lm	ll	lm	lm	lm	ll	lm	ll	ll	ll	ll	lm	lm	lm	lm	lm	ll	ll	ll	ll	ll	lm	lm	ll	lm	lm	lm	lm	lm	lm	lm	ll	lm	lm	ll	lm	lm	lm	ll	ll	ll	ll	ll	ll
Marker36557	<lmxll>	ll	lm	ll	lm	ll	lm	ll	ll	ll	lm	ll	lm	lm	lm	lm	ll	ll	ll	ll	ll	lm	lm	lm	lm	lm	ll	ll	lm	ll	ll	ll	ll	ll	ll	ll	lm	lm	ll	lm	ll	ll	ll	lm	lm	lm	lm	lm	lm
Marker20547	<lmxll>	lm	ll	lm	ll	lm	ll	lm	lm	lm	ll	lm	ll	ll	ll	ll	lm	lm	lm	lm	lm	ll	ll	ll	ll	ll	lm	lm	ll	lm	lm	lm	lm	lm	lm	lm	ll	lm	lm	ll	lm	lm	lm	ll	ll	ll	ll	ll	ll
Marker2993	<nnxnp>	np	np	nn	nn	nn	np	np	np	np	nn	nn	nn	np	np	np	np	nn	np	nn	np	np	nn	np	nn	np	nn	np	nn	np	np	np	np	np	np	nn	nn	np	np	nn	np	nn	np	nn	nn	nn	np	np	nn
Marker26132	<lmxll>	ll	lm	ll	lm	ll	lm	ll	ll	ll	lm	ll	lm	lm	lm	lm	ll	ll	ll	ll	ll	lm	lm	lm	lm	lm	ll	ll	lm	ll	ll	ll	ll	ll	ll	ll	lm	ll	ll	lm	ll	ll	ll	lm	lm	lm	lm	lm	lm
Marker4122	<lmxll>	lm	ll	lm	ll	lm	ll	lm	lm	lm	ll	lm	ll	ll	ll	ll	lm	lm	lm	lm	lm	ll	ll	ll	ll	ll	lm	lm	ll	lm	lm	lm	lm	lm	lm	lm	ll	lm	lm	ll	lm	lm	lm	ll	ll	ll	ll	ll	ll
Marker20571	<lmxll>	ll	lm	ll	lm	ll	lm	ll	ll	ll	lm	ll	lm	lm	lm	lm	ll	ll	ll	ll	ll	lm	lm	lm	lm	lm	ll	ll	lm	ll	ll	ll	ll	ll	ll	lm	lm	ll	ll	lm	ll	ll	ll	lm	lm	lm	lm	lm	lm
Marker43853	<lmxll>	lm	ll	lm	ll	lm	ll	lm	lm	lm	ll	lm	ll	ll	ll	ll	lm	lm	lm	lm	lm	ll	ll	ll	ll	ll	lm	lm	lm	lm	lm	lm	lm	lm	lm	lm	ll	ll	lm	ll	lm	lm	lm	ll	lm	lm	ll	ll	ll
Marker26905	<abxcd>	bc	ac	--	ac	bc	ad	bc	bd	bc	ac	bc	ad	ad	ac	ad	bc	bd	bc	bd	bc	ac	ad	ac	--	ac	bc	bc	ad	bc	bd	--	bc	bc	--	--	ad	ac	--	ad	bc	--	bc	ac	bd	ad	--	ac	--
Marker20578	<lmxll>	ll	lm	ll	lm	ll	lm	ll	ll	ll	lm	ll	lm	lm	lm	lm	ll	ll	ll	ll	ll	lm	lm	lm	lm	lm	ll	ll	lm	ll	ll	ll	ll	ll	ll	ll	lm	lm	ll	lm	ll	ll	ll	lm	ll	ll	lm	lm	lm
Marker20565	<lmxll>	ll	lm	ll	lm	ll	lm	ll	ll	ll	lm	ll	lm	lm	lm	lm	ll	ll	ll	ll	ll	lm	lm	lm	lm	lm	ll	ll	lm	ll	ll	ll	ll	ll	ll	ll	lm	lm	ll	lm	ll	ll	ll	lm	ll	lm	lm	lm	lm
Marker25393	<lmxll>	ll	lm	ll	lm	ll	lm	ll	ll	ll	lm	ll	lm	lm	lm	lm	ll	ll	ll	ll	ll	lm	lm	lm	lm	lm	ll	ll	lm	ll	ll	ll	ll	ll	ll	ll	lm	lm	ll	lm	ll	ll	ll	lm	ll	lm	lm	lm	lm
Marker3648	<lmxll>	ll	lm	ll	lm	ll	lm	ll	ll	ll	lm	ll	lm	lm	lm	lm	ll	ll	ll	ll	ll	lm	lm	lm	lm	lm	ll	ll	lm	ll	ll	ll	ll	ll	ll	ll	lm	lm	ll	lm	ll	ll	ll	lm	ll	lm	lm	lm	lm
Marker7136	<lmxll>	lm	ll	lm	ll	lm	ll	lm	lm	lm	ll	lm	ll	ll	ll	ll	lm	lm	lm	lm	lm	ll	ll	ll	ll	ll	lm	lm	ll	lm	lm	lm	lm	lm	lm	lm	ll	ll	lm	ll	lm	lm	lm	ll	lm	ll	ll	ll	lm
Marker42611	<lmxll>	lm	ll	lm	ll	lm	ll	lm	lm	lm	ll	lm	ll	ll	ll	ll	lm	lm	lm	lm	lm	ll	ll	ll	lm	ll	lm	lm	ll	lm	lm	lm	lm	lm	lm	lm	ll	ll	lm	ll	lm	lm	lm	ll	lm	ll	ll	ll	lm
Marker4146	<efxeg>	eg	fg	ee	--	eg	--	eg	eg	eg	ef	ee	ef	fg	--	fg	eg	ee	eg	--	eg	fg	fg	--	ef	fg	ee	eg	ef	eg	eg	eg	eg	eg	eg	ee	ef	fg	eg	--	eg	eg	eg	fg	eg	fg	fg	fg	ef
Marker43746	<lmxll>	ll	lm	ll	lm	ll	lm	ll	ll	ll	lm	ll	lm	lm	lm	lm	ll	ll	ll	ll	ll	lm	lm	lm	ll	lm	ll	ll	lm	ll	ll	ll	ll	ll	ll	ll	lm	lm	ll	ll	ll	ll	ll	lm	ll	lm	lm	lm	lm
Marker18724	<lmxll>	ll	lm	ll	lm	ll	lm	ll	ll	ll	lm	ll	lm	lm	lm	lm	ll	ll	ll	ll	ll	lm	lm	lm	ll	lm	ll	ll	lm	ll	ll	ll	ll	ll	ll	ll	lm	lm	ll	ll	ll	ll	ll	lm	ll	lm	lm	lm	lm
Marker12944	<nnxnp>	np	np	nn	np	np	np	np	np	np	nn	nn	nn	np	np	np	np	nn	np	nn	np	np	np	np	nn	np	nn	np	nn	np	np	np	np	np	np	nn	nn	np	np	np	np	nn	np	np	nn	nn	np	np	nn
Marker26310	<lmxll>	ll	lm	ll	lm	ll	lm	ll	ll	ll	lm	ll	lm	lm	lm	lm	ll	ll	ll	ll	ll	lm	lm	lm	ll	lm	ll	ll	ll	ll	ll	ll	ll	ll	ll	ll	lm	lm	ll	lm	ll	ll	ll	ll	ll	ll	ll	lm	ll
Marker9259	<efxeg>	ee	ef	ee	ef	ee	ef	ee	--	ee	ee	ee	ef	ef	ef	ef	ee	ee	ee	ee	--	ef	ef	ef	ee	ef	ee	ee	ef	ee	ee	--	ee	ee	ee	ee	--	ef	--	--	ee	--	--	--	--	--	--	ee	ee
Marker26117	<nnxnp>	nn	nn	np	nn	nn	nn	nn	nn	nn	nn	nn	nn	nn	nn	nn	nn	nn	nn	nn	np	nn	nn	nn	nn	nn	nn	nn	nn	nn	nn	nn	nn	nn	nn	np	nn	nn	nn	np	nn	nn	nn	nn	np	nn	nn	nn	np
Marker24031	<nnxnp>	nn	nn	np	nn	nn	nn	nn	nn	nn	nn	nn	nn	nn	nn	nn	nn	nn	nn	nn	np	nn	nn	nn	nn	nn	nn	nn	nn	nn	nn	nn	nn	nn	nn	np	nn	nn	nn	np	nn	nn	nn	nn	np	nn	nn	nn	np
Marker34276	<lmxll>	lm	ll	lm	ll	lm	ll	lm	lm	lm	lm	lm	ll	ll	ll	ll	lm	lm	lm	lm	lm	ll	ll	ll	lm	ll	lm	lm	ll	lm	lm	lm	lm	lm	lm	lm	ll	ll	lm	lm	lm	lm	lm	ll	lm	ll	ll	ll	ll
Marker2390	<lmxll>	lm	ll	lm	ll	lm	ll	lm	lm	lm	lm	lm	ll	ll	ll	ll	lm	lm	lm	lm	lm	ll	ll	ll	lm	ll	lm	lm	ll	lm	lm	lm	lm	lm	lm	lm	ll	ll	lm	lm	lm	lm	lm	ll	lm	ll	ll	ll	ll
Marker62377	<nnxnp>	nn	nn	np	nn	nn	nn	nn	nn	nn	np	np	np	nn	nn	nn	nn	np	nn	np	nn	nn	nn	nn	np	nn	np	nn	np	nn	nn	nn	nn	nn	nn	np	np	nn	nn	nn	nn	nn	nn	nn	nn	nn	nn	nn	np
Marker26341	<nnxnp>	np	np	nn	np	np	np	np	np	np	nn	nn	nn	np	np	np	np	nn	np	nn	np	np	np	np	nn	np	nn	np	nn	np	np	np	np	np	np	nn	nn	np	np	np	np	np	np	np	np	np	np	np	nn
Marker34307	<lmxll>	lm	ll	lm	ll	lm	ll	lm	lm	lm	lm	lm	ll	ll	ll	ll	lm	lm	lm	lm	lm	ll	ll	ll	lm	ll	lm	lm	ll	lm	lm	lm	lm	lm	lm	lm	lm	ll	lm	lm	lm	lm	lm	ll	lm	ll	ll	ll	ll
Marker12934	<nnxnp>	nn	nn	np	nn	nn	nn	nn	nn	nn	np	np	np	nn	nn	nn	nn	np	nn	np	nn	nn	nn	nn	np	nn	np	nn	np	nn	nn	nn	nn	nn	nn	np	np	nn	nn	nn	nn	nn	nn	nn	nn	nn	nn	nn	np
Marker34277	<lmxll>	lm	ll	lm	ll	lm	ll	lm	lm	lm	lm	lm	ll	ll	ll	ll	lm	lm	lm	lm	lm	ll	ll	ll	lm	ll	lm	lm	ll	lm	lm	lm	lm	lm	lm	lm	lm	ll	lm	lm	lm	lm	lm	ll	lm	ll	ll	ll	ll
Marker9494	<lmxll>	lm	ll	lm	ll	lm	ll	lm	lm	lm	lm	lm	ll	ll	ll	ll	lm	lm	lm	lm	lm	ll	ll	ll	lm	ll	lm	lm	lm	lm	lm	lm	lm	lm	lm	lm	ll	ll	lm	ll	lm	lm	lm	lm	lm	lm	lm	ll	lm
Marker28216	<nnxnp>	nn	nn	np	nn	nn	nn	nn	nn	nn	nn	nn	nn	nn	nn	nn	nn	nn	nn	nn	np	nn	nn	nn	np	nn	nn	nn	nn	nn	nn	nn	nn	nn	nn	np	nn	nn	nn	np	nn	nn	nn	nn	np	nn	nn	nn	np
Marker2924	<lmxll>	ll	lm	ll	lm	ll	lm	ll	ll	ll	ll	ll	ll	lm	lm	lm	ll	ll	ll	ll	ll	lm	lm	lm	ll	lm	ll	ll	lm	lm	ll	ll	ll	ll	ll	ll	lm	ll	ll	ll	ll	ll	ll	lm	lm	lm	lm	lm	lm
Marker5687	<nnxnp>	nn	nn	np	nn	nn	nn	nn	nn	nn	nn	nn	np	nn	nn	nn	nn	nn	nn	np	np	nn	nn	nn	np	nn	nn	nn	nn	nn	nn	nn	nn	nn	nn	np	nn	nn	nn	np	nn	nn	nn	nn	np	nn	nn	nn	np
Marker40624	<nnxnp>	nn	nn	np	nn	nn	nn	nn	nn	nn	nn	nn	np	nn	nn	nn	nn	nn	nn	np	np	nn	nn	nn	nn	nn	nn	nn	nn	nn	nn	nn	nn	nn	nn	np	nn	nn	nn	np	nn	nn	nn	nn	np	nn	nn	nn	np
Marker6564	<nnxnp>	nn	nn	np	nn	nn	nn	nn	nn	nn	nn	nn	np	nn	nn	nn	nn	nn	nn	np	np	nn	nn	nn	nn	nn	nn	nn	nn	nn	nn	nn	nn	nn	nn	np	nn	nn	nn	np	nn	nn	nn	nn	np	nn	nn	nn	np
Marker31934	<lmxll>	ll	lm	ll	lm	ll	lm	ll	ll	ll	ll	ll	lm	lm	lm	lm	ll	ll	ll	ll	ll	lm	lm	lm	ll	lm	ll	ll	lm	ll	ll	ll	ll	ll	ll	ll	lm	ll	ll	ll	ll	ll	ll	lm	lm	ll	ll	ll	lm
Marker38230	<nnxnp>	nn	nn	np	nn	nn	nn	nn	nn	nn	nn	nn	np	nn	nn	nn	nn	np	nn	np	nn	nn	nn	nn	np	nn	nn	nn	np	nn	nn	nn	nn	nn	nn	np	np	nn	nn	np	nn	nn	nn	nn	nn	nn	nn	nn	np
Marker29526	<efxeg>	eg	--	ee	fg	eg	ef	eg	eg	eg	eg	eg	ef	fg	--	fg	ee	ee	eg	ee	ee	fg	fg	fg	--	fg	eg	eg	ef	--	eg	--	eg	eg	--	ee	ef	eg	--	--	eg	ee	--	fg	--	--	ee	--	--
Marker15823	<abxcd>	bd	--	--	--	ad	--	--	bd	ad	--	ad	ac	--	--	--	--	bc	--	bc	bc	--	ad	--	--	ad	--	--	ac	--	--	--	--	bd	bd	bd	--	ad	ad	--	bd	--	--	ad	--	--	--	--	--
Marker25389	<nnxnp>	nn	nn	np	nn	nn	nn	nn	nn	nn	nn	nn	np	nn	nn	nn	nn	np	nn	np	nn	nn	nn	nn	np	nn	nn	nn	np	nn	nn	nn	nn	nn	nn	np	np	nn	nn	np	nn	nn	nn	nn	nn	nn	nn	nn	np
Marker38221	<nnxnp>	np	np	nn	np	np	np	np	np	np	np	np	nn	np	np	np	np	nn	np	nn	np	np	np	np	nn	np	np	np	nn	np	np	np	np	np	np	nn	nn	np	np	nn	np	np	np	np	np	np	np	np	nn
Marker7892	<lmxll>	lm	ll	lm	ll	lm	ll	lm	lm	lm	lm	lm	ll	ll	ll	ll	lm	lm	lm	lm	lm	ll	ll	ll	lm	ll	lm	lm	ll	lm	lm	lm	lm	lm	lm	lm	ll	ll	lm	lm	lm	lm	lm	ll	ll	lm	lm	lm	lm
Marker32845	<lmxll>	lm	ll	lm	ll	lm	ll	lm	lm	lm	lm	lm	ll	ll	ll	ll	lm	lm	lm	lm	lm	ll	ll	ll	lm	ll	lm	lm	ll	lm	lm	lm	lm	lm	lm	lm	ll	ll	lm	lm	lm	lm	lm	ll	ll	lm	lm	lm	lm
Marker19633	<nnxnp>	nn	nn	np	nn	nn	nn	nn	nn	nn	nn	nn	np	nn	nn	nn	nn	nn	nn	np	np	nn	nn	nn	np	nn	nn	nn	nn	nn	nn	nn	nn	nn	nn	np	nn	nn	nn	np	nn	nn	nn	nn	np	nn	nn	nn	np
Marker5154	<lmxll>	lm	ll	lm	ll	lm	ll	lm	lm	lm	lm	lm	ll	ll	ll	ll	lm	lm	lm	lm	lm	ll	ll	ll	lm	ll	lm	lm	ll	lm	lm	lm	lm	lm	lm	lm	ll	ll	lm	lm	lm	lm	lm	ll	ll	lm	lm	lm	lm
Marker5139	<lmxll>	ll	lm	ll	lm	ll	lm	ll	ll	ll	ll	ll	lm	lm	lm	lm	ll	ll	ll	ll	ll	lm	lm	lm	ll	lm	ll	ll	lm	ll	ll	ll	ll	ll	ll	ll	lm	ll	ll	ll	ll	ll	ll	lm	lm	ll	ll	ll	ll
Marker5758	<nnxnp>	np	np	nn	np	np	np	np	np	np	np	np	nn	np	np	np	np	nn	np	nn	np	np	np	np	nn	np	np	np	nn	np	np	np	np	np	np	nn	nn	np	np	nn	np	np	np	np	np	np	np	np	nn
Marker32202	<lmxll>	lm	ll	lm	ll	lm	lm	lm	lm	lm	lm	lm	ll	ll	ll	ll	lm	lm	lm	lm	lm	ll	ll	ll	lm	ll	lm	lm	ll	lm	lm	lm	lm	lm	lm	lm	ll	ll	lm	lm	lm	lm	lm	ll	ll	lm	lm	ll	lm
Marker18149	<nnxnp>	nn	nn	np	nn	nn	nn	nn	nn	nn	nn	nn	np	nn	nn	nn	nn	np	nn	np	np	nn	nn	nn	np	nn	nn	nn	np	nn	nn	nn	nn	nn	nn	np	nn	nn	nn	np	nn	nn	nn	nn	np	nn	nn	nn	np
Marker27502	<lmxll>	ll	lm	ll	lm	ll	ll	ll	ll	ll	ll	ll	lm	lm	lm	lm	ll	ll	ll	ll	ll	lm	lm	lm	ll	lm	ll	ll	lm	ll	ll	ll	ll	ll	ll	ll	lm	lm	ll	ll	ll	ll	ll	lm	ll	ll	ll	lm	ll
Marker7881	<lmxll>	lm	ll	lm	ll	lm	lm	lm	lm	lm	lm	lm	ll	ll	ll	ll	lm	lm	lm	lm	lm	ll	ll	ll	lm	ll	lm	lm	ll	lm	lm	lm	lm	lm	lm	lm	ll	ll	lm	lm	lm	lm	lm	ll	ll	lm	lm	ll	lm
Marker4664	<lmxll>	lm	ll	lm	ll	lm	lm	lm	lm	lm	lm	lm	ll	lm	ll	ll	lm	lm	lm	lm	lm	ll	ll	ll	lm	ll	lm	lm	ll	lm	lm	lm	lm	lm	lm	lm	ll	ll	lm	lm	lm	lm	lm	ll	lm	lm	lm	ll	lm
Marker26940	<nnxnp>	np	np	nn	np	np	np	np	np	np	np	np	nn	np	np	np	np	nn	np	nn	nn	np	np	np	nn	np	np	np	np	np	np	np	np	np	np	nn	np	np	np	nn	np	np	np	np	nn	np	np	np	nn
Marker12495	<efxeg>	ee	ef	eg	ef	ee	ef	ee	ee	ee	ee	ee	--	ee	ef	ef	ee	eg	ee	eg	eg	ef	--	ef	--	ef	ee	--	eg	ee	ee	--	--	ee	ee	--	fg	ef	ee	eg	ee	ee	ee	ef	--	ee	ee	--	fg
Marker32842	<lmxll>	ll	lm	ll	lm	ll	lm	ll	ll	ll	ll	ll	lm	lm	lm	lm	ll	ll	ll	ll	ll	lm	lm	ll	ll	lm	ll	ll	lm	ll	ll	ll	ll	ll	ll	ll	lm	lm	ll	ll	ll	ll	ll	lm	lm	ll	ll	lm	ll
Marker1735	<nnxnp>	np	np	nn	np	np	np	np	np	np	np	np	nn	np	np	np	nn	nn	np	nn	nn	np	np	np	nn	np	np	np	nn	np	np	np	np	np	np	nn	nn	np	np	nn	np	np	np	np	np	np	np	np	nn
Marker32841	<lmxll>	ll	lm	ll	lm	ll	ll	ll	ll	ll	ll	ll	lm	lm	lm	lm	ll	ll	ll	ll	ll	lm	lm	ll	ll	lm	ll	ll	lm	ll	ll	ll	ll	ll	ll	ll	lm	lm	ll	ll	ll	ll	ll	lm	lm	ll	ll	lm	ll
Marker9769	<nnxnp>	np	np	nn	np	np	np	np	np	np	np	np	nn	np	np	np	nn	nn	np	nn	nn	np	np	np	nn	np	np	nn	nn	np	np	np	np	np	np	nn	nn	np	np	nn	nn	nn	np	np	nn	np	np	np	nn
Marker28988	<nnxnp>	np	np	nn	np	np	np	np	np	np	np	np	nn	np	np	np	nn	nn	np	nn	nn	np	np	nn	nn	np	np	np	nn	np	np	np	np	np	np	nn	nn	nn	np	nn	np	np	np	np	nn	np	nn	nn	nn
Marker6677	<lmxll>	ll	lm	ll	ll	ll	ll	ll	ll	ll	ll	ll	lm	ll	lm	lm	ll	ll	ll	ll	ll	lm	lm	lm	ll	lm	ll	ll	lm	ll	ll	ll	ll	ll	ll	ll	lm	lm	ll	ll	ll	ll	ll	lm	ll	ll	ll	lm	ll
Marker34760	<nnxnp>	np	np	nn	np	np	np	np	np	np	np	np	nn	np	np	np	nn	nn	np	nn	nn	np	np	np	nn	np	np	np	nn	np	np	np	np	np	np	nn	nn	np	np	nn	np	np	np	np	nn	np	np	nn	nn
Marker2324	<nnxnp>	np	np	nn	np	np	np	np	np	np	np	np	nn	np	np	np	nn	nn	nn	nn	nn	np	np	nn	nn	np	np	np	nn	np	np	np	np	np	np	nn	nn	nn	np	nn	np	np	np	np	nn	np	nn	nn	nn
Marker5169	<lmxll>	ll	lm	ll	ll	ll	ll	ll	ll	ll	ll	ll	lm	ll	lm	lm	ll	ll	ll	ll	ll	lm	lm	ll	ll	lm	ll	ll	lm	ll	ll	ll	ll	ll	ll	ll	lm	lm	ll	ll	ll	ll	ll	lm	ll	ll	ll	lm	ll
Marker60171	<nnxnp>	nn	nn	np	nn	nn	nn	nn	nn	nn	nn	nn	np	nn	nn	nn	np	np	nn	np	np	nn	nn	nn	np	nn	nn	nn	np	nn	nn	nn	nn	nn	nn	np	np	nn	nn	np	nn	nn	nn	nn	np	nn	nn	nn	np
Marker44988	<nnxnp>	np	np	nn	np	np	np	np	np	np	np	np	nn	np	np	np	nn	nn	np	nn	nn	np	np	np	nn	np	np	np	nn	np	np	np	np	np	np	nn	nn	np	np	nn	np	np	np	np	nn	np	np	np	nn
Marker2290	<nnxnp>	nn	nn	np	nn	nn	nn	nn	nn	nn	nn	nn	np	nn	nn	nn	np	np	nn	np	np	nn	nn	nn	np	nn	nn	nn	np	nn	nn	nn	nn	nn	nn	np	np	nn	nn	np	nn	nn	nn	nn	np	nn	nn	nn	np
Marker4428	<efxeg>	ee	ee	eg	ee	ee	ee	ee	--	--	ef	ee	--	ee	ee	ee	eg	eg	ef	--	--	ee	ee	ee	eg	ee	ef	ef	--	ee	ee	--	--	--	ee	eg	--	ee	ee	--	ee	ee	ee	ee	--	--	ee	ee	--
Marker21510	<nnxnp>	np	np	nn	np	np	np	np	np	np	np	np	nn	np	np	np	nn	nn	nn	nn	nn	np	np	nn	nn	np	np	np	nn	np	np	np	np	np	np	nn	nn	np	np	nn	np	np	np	np	nn	np	nn	nn	nn
Marker42925	<nnxnp>	np	np	nn	np	np	np	np	np	np	np	np	nn	np	np	np	nn	nn	np	nn	nn	np	np	np	nn	np	np	nn	nn	np	np	nn	np	np	np	nn	nn	np	np	nn	np	nn	np	np	nn	np	np	np	nn
Marker22562	<lmxll>	ll	lm	ll	ll	ll	lm	ll	ll	ll	ll	ll	lm	ll	lm	lm	ll	ll	ll	ll	ll	ll	lm	ll	ll	lm	ll	ll	lm	ll	ll	ll	ll	ll	ll	ll	lm	lm	ll	ll	ll	ll	ll	ll	ll	ll	ll	lm	ll
Marker2503	<nnxnp>	nn	nn	np	nn	nn	nn	nn	nn	nn	nn	nn	np	nn	nn	nn	np	np	np	np	np	nn	nn	nn	np	nn	nn	nn	np	nn	nn	nn	nn	nn	nn	np	np	nn	nn	np	np	nn	nn	nn	np	nn	nn	nn	np
Marker30463	<nnxnp>	nn	nn	np	nn	nn	nn	nn	nn	nn	nn	nn	np	nn	nn	nn	np	np	np	np	np	nn	nn	nn	np	nn	nn	nn	np	nn	nn	nn	nn	nn	nn	np	np	nn	nn	np	np	nn	nn	nn	np	nn	nn	nn	np
Marker4677	<lmxll>	ll	lm	ll	ll	ll	lm	ll	ll	ll	ll	ll	lm	ll	lm	lm	ll	ll	ll	ll	ll	ll	lm	ll	ll	lm	ll	ll	lm	ll	ll	ll	ll	ll	ll	ll	lm	lm	ll	ll	ll	ll	ll	ll	ll	ll	ll	lm	ll
Marker24841	<nnxnp>	np	np	nn	np	np	np	np	np	np	np	np	nn	np	np	np	nn	nn	nn	nn	nn	np	np	np	nn	np	np	np	nn	np	np	np	np	np	np	nn	nn	np	np	nn	nn	np	np	np	nn	nn	np	np	nn
Marker6529	<efxeg>	--	--	--	ef	ef	ee	ef	--	ef	ef	ef	fg	ee	ee	ee	--	fg	fg	--	fg	ee	ef	ef	--	ef	ef	ef	fg	ef	ee	--	ef	ef	ee	--	--	ef	--	--	eg	ee	--	ef	--	ee	--	ee	--
Marker32834	<nnxnp>	nn	nn	np	nn	nn	nn	nn	nn	nn	nn	nn	np	nn	nn	nn	np	np	nn	np	np	nn	nn	nn	np	nn	nn	nn	np	nn	nn	np	nn	nn	nn	np	np	nn	nn	np	nn	np	nn	nn	np	nn	nn	nn	np
Marker35461	<nnxnp>	np	np	nn	np	np	np	np	np	np	np	np	nn	np	np	np	nn	nn	np	nn	nn	np	np	np	nn	np	np	np	nn	np	np	nn	nn	np	np	nn	nn	np	np	nn	np	nn	np	np	nn	np	nn	np	nn
Marker44062	<nnxnp>	np	np	nn	np	np	np	np	np	np	np	np	nn	np	np	np	nn	nn	nn	nn	nn	np	np	np	nn	np	np	np	nn	np	np	nn	nn	np	np	nn	nn	np	np	nn	nn	nn	np	np	nn	np	nn	np	nn
Marker24873	<efxeg>	eg	ee	fg	ef	ef	--	ef	--	ef	ef	ef	fg	ee	ee	ee	--	fg	fg	--	fg	ee	ef	--	fg	ee	ef	ef	--	ef	ee	--	--	ef	--	--	--	--	eg	--	--	--	--	ee	--	ee	--	--	--
Marker268	<efxeg>	--	ee	fg	ef	ef	--	ef	--	ef	ef	ef	fg	ee	ee	ee	--	fg	fg	--	fg	ee	ef	--	fg	ee	ef	ef	--	ef	ef	--	--	ef	--	--	--	--	eg	--	--	--	--	ee	--	--	--	--	--
Marker19710	<nnxnp>	nn	np	nn	np	np	np	np	np	np	np	np	nn	np	np	np	nn	nn	nn	nn	nn	np	np	nn	nn	np	np	np	nn	np	np	nn	np	np	np	nn	nn	np	nn	nn	nn	np	nn	np	nn	nn	np	np	nn
Marker30924	<nnxnp>	nn	np	nn	np	np	np	np	np	np	np	np	nn	np	np	np	nn	nn	nn	nn	nn	np	np	nn	nn	np	np	np	nn	np	np	nn	np	np	np	nn	nn	np	np	nn	nn	np	nn	np	nn	nn	np	np	nn
Marker59635	<nnxnp>	np	nn	np	nn	nn	nn	nn	nn	nn	nn	nn	np	nn	nn	nn	np	np	np	np	np	nn	nn	np	np	nn	nn	nn	np	nn	nn	np	nn	nn	nn	np	np	nn	nn	np	np	nn	np	nn	np	np	nn	nn	np
Marker22683	<lmxll>	ll	ll	lm	lm	lm	ll	lm	lm	lm	lm	lm	lm	ll	ll	ll	lm	lm	lm	lm	lm	ll	lm	lm	lm	lm	lm	lm	lm	lm	ll	lm	lm	lm	lm	lm	lm	lm	ll	lm	ll	ll	lm	ll	ll	ll	lm	ll	lm
Marker16062	<nnxnp>	nn	nn	np	nn	nn	nn	nn	nn	nn	nn	nn	np	nn	nn	nn	np	np	np	np	np	nn	nn	np	np	nn	nn	nn	np	nn	nn	np	nn	nn	nn	np	np	nn	nn	np	np	nn	np	nn	np	np	nn	nn	np
Marker9105	<lmxll>	ll	lm	ll	ll	ll	ll	lm	ll	ll	lm	ll	ll	lm	ll	ll	ll	ll	ll	ll	ll	ll	ll	ll	ll	ll	ll	ll	ll	ll	ll	ll	ll	lm	ll	ll	ll	ll	ll	ll	lm	ll	ll	ll	ll	ll	ll	lm	ll
Marker25777	<efxeg>	eg	eg	fg	fg	fg	eg	fg	--	fg	fg	fg	--	ee	eg	--	--	ef	ef	ef	ef	eg	--	fg	ef	fg	fg	fg	ef	fg	--	--	--	fg	--	ef	--	fg	fg	ef	ee	fg	fg	fg	ee	ee	fg	eg	ef
Marker43553	<nnxnp>	np	np	np	np	np	np	np	np	np	np	np	nn	np	np	np	nn	nn	nn	nn	nn	np	np	np	nn	np	np	np	nn	np	np	nn	nn	np	np	nn	nn	np	np	nn	nn	nn	nn	np	nn	np	nn	np	nn
Marker8849	<lmxll>	lm	ll	lm	lm	lm	lm	ll	lm	lm	ll	lm	lm	ll	ll	lm	lm	lm	lm	lm	lm	lm	lm	lm	lm	lm	lm	lm	lm	lm	lm	lm	lm	lm	lm	lm	lm	lm	lm	lm	lm	lm	lm	lm	lm	lm	lm	ll	lm
Marker11483	<nnxnp>	np	np	np	np	np	np	np	np	nn	np	np	nn	np	np	np	nn	nn	nn	nn	nn	np	np	nn	nn	np	np	np	nn	np	np	nn	nn	np	np	nn	nn	np	np	nn	nn	nn	nn	np	nn	nn	np	np	nn
Marker25770	<lmxll>	ll	ll	lm	lm	lm	ll	lm	lm	lm	lm	lm	lm	ll	ll	ll	lm	lm	lm	lm	lm	ll	lm	lm	lm	lm	lm	lm	lm	lm	lm	lm	lm	lm	lm	lm	lm	lm	lm	lm	ll	ll	lm	lm	ll	ll	lm	ll	lm
Marker31868	<lmxll>	ll	ll	lm	lm	lm	ll	lm	lm	lm	lm	lm	lm	ll	ll	ll	lm	lm	lm	lm	lm	ll	lm	lm	lm	lm	lm	lm	lm	lm	lm	lm	lm	lm	ll	lm	lm	lm	lm	lm	ll	ll	lm	lm	ll	ll	lm	ll	lm
Marker16437	<efxeg>	eg	eg	ef	--	fg	--	ee	--	fg	eg	fg	ef	eg	eg	eg	ef	ef	ef	ef	ef	eg	fg	fg	ef	fg	fg	fg	ef	fg	fg	--	fg	fg	fg	ef	ef	fg	--	ef	ee	--	fg	fg	ef	eg	--	ee	--
Marker11530	<nnxnp>	nn	nn	np	nn	nn	nn	nn	nn	nn	nn	nn	np	nn	nn	nn	np	np	np	np	np	nn	nn	np	np	nn	nn	nn	np	nn	nn	np	nn	nn	nn	np	np	nn	nn	np	np	nn	np	nn	np	np	nn	nn	np
Marker30921	<nnxnp>	np	np	nn	np	np	np	np	np	nn	np	np	nn	np	np	np	nn	nn	nn	nn	nn	np	np	nn	nn	np	np	np	nn	np	np	nn	nn	np	np	nn	nn	np	np	nn	nn	np	nn	np	nn	nn	np	np	nn
Marker38741	<lmxll>	lm	lm	ll	ll	ll	lm	ll	ll	ll	ll	ll	ll	lm	lm	lm	ll	ll	ll	ll	ll	lm	ll	ll	ll	ll	ll	ll	ll	ll	ll	ll	ll	ll	ll	ll	ll	ll	ll	ll	lm	ll	ll	ll	lm	lm	ll	lm	ll
Marker5954	<lmxll>	lm	lm	ll	ll	ll	lm	ll	ll	ll	ll	ll	ll	lm	lm	lm	ll	ll	ll	ll	ll	lm	ll	ll	ll	ll	ll	ll	ll	ll	ll	ll	ll	ll	ll	ll	ll	ll	ll	ll	lm	ll	ll	ll	lm	lm	ll	lm	ll
Marker39847	<lmxll>	lm	lm	ll	ll	ll	lm	ll	ll	ll	ll	ll	ll	lm	lm	lm	ll	ll	ll	ll	ll	lm	ll	ll	ll	ll	ll	ll	ll	ll	ll	ll	ll	ll	ll	ll	ll	ll	ll	ll	lm	ll	ll	ll	lm	lm	ll	lm	ll
Marker38316	<lmxll>	lm	lm	ll	ll	ll	lm	ll	ll	ll	ll	ll	ll	lm	lm	lm	ll	ll	ll	ll	ll	lm	ll	ll	ll	ll	ll	ll	ll	ll	ll	ll	ll	ll	ll	ll	ll	ll	ll	ll	lm	ll	ll	ll	lm	lm	ll	lm	ll
Marker22713	<nnxnp>	np	nn	np	nn	nn	nn	nn	nn	nn	nn	nn	np	nn	nn	nn	np	np	np	np	np	nn	nn	np	np	nn	nn	nn	np	nn	nn	np	np	nn	nn	np	np	nn	nn	np	np	nn	np	nn	np	np	nn	nn	np
Marker25773	<lmxll>	ll	ll	lm	lm	lm	ll	lm	lm	lm	lm	lm	lm	ll	ll	ll	lm	lm	lm	lm	lm	ll	lm	lm	lm	lm	lm	lm	lm	lm	lm	lm	lm	lm	lm	lm	lm	lm	lm	lm	ll	lm	lm	lm	ll	ll	lm	ll	lm
Marker7696	<lmxll>	ll	lm	ll	ll	ll	ll	lm	ll	ll	lm	ll	ll	ll	ll	ll	ll	ll	ll	ll	ll	ll	ll	ll	ll	ll	ll	ll	ll	ll	ll	ll	ll	lm	ll	ll	ll	ll	ll	ll	lm	ll	ll	ll	ll	ll	ll	lm	ll
Marker11520	<lmxll>	lm	ll	lm	lm	lm	lm	ll	lm	lm	ll	lm	lm	lm	lm	lm	lm	lm	lm	lm	lm	lm	lm	lm	lm	lm	lm	lm	lm	lm	lm	lm	lm	ll	lm	lm	lm	lm	lm	lm	ll	lm	lm	lm	lm	lm	lm	ll	lm
Marker3806	<nnxnp>	np	np	nn	np	np	np	np	np	np	np	np	nn	np	np	np	nn	nn	nn	nn	nn	np	np	nn	nn	np	np	np	nn	np	np	nn	nn	np	np	nn	nn	np	np	nn	nn	np	nn	np	nn	nn	np	np	nn
Marker8424	<nnxnp>	np	np	nn	np	np	np	np	np	np	np	np	nn	np	np	np	nn	nn	nn	nn	nn	np	np	nn	nn	np	np	np	nn	np	np	nn	nn	np	np	nn	nn	np	np	nn	nn	np	nn	np	nn	nn	np	np	nn
Marker61260	<nnxnp>	nn	nn	np	nn	nn	nn	nn	nn	nn	nn	nn	np	nn	nn	nn	np	np	np	np	np	nn	nn	np	np	nn	nn	nn	np	nn	nn	np	np	nn	nn	np	np	nn	nn	np	np	nn	np	nn	np	np	nn	nn	np
Marker8422	<nnxnp>	np	np	nn	np	np	np	np	np	np	np	np	nn	np	np	np	nn	nn	nn	nn	nn	np	np	nn	nn	np	np	np	nn	np	np	nn	nn	np	np	nn	nn	np	np	nn	nn	np	nn	np	nn	nn	np	np	nn
Marker34974	<nnxnp>	np	np	nn	np	np	np	np	np	np	np	np	nn	np	np	np	nn	nn	nn	nn	nn	np	np	nn	nn	np	np	np	nn	np	np	nn	nn	np	np	nn	nn	np	np	nn	nn	np	nn	np	nn	nn	np	np	nn
Marker34976	<nnxnp>	np	np	nn	np	np	np	np	np	np	np	np	nn	np	np	np	nn	nn	nn	nn	nn	np	np	nn	nn	np	np	np	nn	np	np	nn	nn	np	np	nn	nn	np	np	nn	nn	np	nn	np	nn	nn	np	np	nn
Marker34594	<lmxll>	lm	ll	lm	lm	lm	lm	ll	lm	lm	ll	lm	lm	ll	ll	lm	lm	lm	lm	lm	lm	ll	lm	lm	lm	lm	lm	lm	lm	lm	lm	lm	lm	lm	lm	lm	lm	lm	lm	lm	lm	lm	lm	lm	lm	lm	lm	ll	lm
Marker33255	<nnxnp>	np	np	nn	np	np	np	np	np	np	np	np	nn	np	np	np	nn	nn	nn	nn	nn	np	np	nn	nn	np	np	np	nn	np	np	nn	nn	np	np	nn	nn	np	np	nn	nn	np	nn	np	nn	nn	np	np	nn
Marker47217	<nnxnp>	np	np	nn	np	np	np	np	nn	np	np	np	nn	np	np	np	nn	nn	nn	nn	nn	np	np	nn	nn	np	np	np	nn	np	np	nn	nn	np	np	nn	nn	np	np	nn	nn	np	nn	np	nn	nn	np	np	nn
Marker11445	<nnxnp>	np	np	nn	np	np	np	np	nn	np	np	np	nn	nn	np	np	nn	nn	nn	nn	nn	np	np	nn	nn	np	np	np	nn	np	np	nn	nn	np	np	nn	nn	np	np	nn	nn	np	nn	np	nn	nn	nn	np	nn
Marker11494	<nnxnp>	np	np	nn	np	np	np	np	np	np	np	np	np	nn	np	np	nn	nn	nn	nn	nn	np	np	nn	nn	np	np	np	nn	nn	np	nn	nn	np	np	nn	nn	np	np	nn	nn	np	nn	np	nn	nn	nn	np	nn
Marker10771	<lmxll>	lm	lm	ll	ll	ll	ll	ll	ll	ll	lm	ll	ll	lm	lm	lm	ll	ll	ll	ll	ll	lm	ll	ll	ll	ll	ll	ll	ll	ll	ll	ll	ll	ll	ll	ll	ll	ll	ll	ll	lm	ll	ll	ll	lm	lm	ll	lm	ll
Marker42589	<nnxnp>	nn	nn	np	nn	nn	nn	nn	nn	nn	nn	nn	nn	np	nn	nn	np	np	np	np	np	nn	nn	np	np	nn	nn	nn	np	np	nn	np	np	nn	nn	np	np	nn	nn	np	np	nn	np	nn	np	np	np	nn	np
Marker26695	<nnxnp>	np	np	nn	np	np	np	np	np	np	np	np	np	nn	np	np	nn	nn	nn	nn	nn	np	np	nn	nn	np	np	np	nn	nn	np	nn	nn	np	np	nn	nn	np	np	nn	nn	np	nn	np	nn	nn	nn	np	nn
Marker10770	<lmxll>	lm	lm	ll	ll	ll	ll	lm	ll	ll	lm	ll	ll	lm	lm	lm	ll	ll	ll	ll	ll	lm	ll	ll	ll	ll	ll	ll	ll	ll	ll	ll	ll	ll	ll	ll	ll	ll	ll	ll	lm	ll	ll	ll	lm	lm	ll	lm	ll
Marker3796	<efxeg>	fg	fg	ee	eg	eg	eg	fg	ef	eg	fg	eg	--	eg	fg	fg	ee	ee	--	ee	ee	fg	eg	ee	ee	--	eg	eg	ee	eg	eg	--	ee	fg	eg	ee	ee	--	--	--	--	--	ee	eg	ee	ef	eg	fg	ee
Marker3800	<nnxnp>	np	np	nn	np	np	np	np	np	np	np	np	nn	np	np	np	nn	nn	nn	nn	nn	np	np	nn	nn	np	np	np	nn	np	np	nn	nn	np	nn	nn	nn	np	np	np	nn	np	nn	np	nn	np	np	np	nn
Marker6693	<lmxll>	ll	ll	lm	lm	lm	lm	ll	lm	lm	ll	lm	lm	ll	ll	ll	lm	lm	lm	lm	lm	ll	lm	lm	lm	lm	lm	lm	lm	lm	lm	lm	lm	lm	lm	lm	lm	lm	lm	lm	ll	lm	lm	lm	lm	ll	lm	ll	lm
Marker31627	<nnxnp>	nn	np	np	nn	nn	nn	nn	nn	nn	nn	nn	np	nn	nn	nn	np	np	np	np	np	nn	nn	np	np	nn	nn	nn	np	nn	nn	np	np	nn	np	np	np	nn	nn	nn	nn	nn	np	nn	np	nn	nn	nn	np
Marker31628	<nnxnp>	nn	np	np	nn	nn	nn	nn	nn	nn	nn	nn	np	nn	nn	nn	np	np	np	np	np	nn	nn	np	np	nn	nn	nn	np	nn	nn	np	np	nn	np	np	np	nn	nn	nn	nn	nn	np	nn	np	nn	nn	nn	np
Marker20003	<lmxll>	lm	lm	ll	ll	ll	ll	lm	ll	ll	lm	ll	ll	ll	lm	lm	ll	ll	ll	ll	ll	lm	ll	ll	ll	ll	ll	ll	ll	ll	ll	ll	ll	lm	ll	ll	ll	ll	ll	ll	ll	ll	ll	ll	ll	lm	ll	lm	ll
Marker19087	<lmxll>	ll	ll	lm	lm	lm	lm	ll	lm	lm	ll	lm	lm	lm	ll	ll	lm	ll	lm	lm	lm	ll	lm	lm	lm	lm	lm	lm	lm	lm	lm	ll	lm	ll	ll	lm	ll	lm	lm	lm	ll	lm	ll	lm	lm	ll	lm	ll	ll
Marker20486	<lmxll>	lm	lm	ll	ll	ll	ll	lm	ll	ll	lm	ll	ll	ll	lm	lm	ll	ll	ll	ll	ll	lm	ll	ll	ll	ll	ll	ll	ll	ll	ll	ll	lm	lm	ll	ll	ll	ll	ll	ll	lm	ll	lm	ll	ll	lm	ll	lm	ll
Marker42201	<lmxll>	ll	ll	lm	lm	lm	lm	ll	lm	lm	ll	lm	lm	lm	ll	ll	lm	lm	lm	lm	lm	ll	lm	lm	lm	lm	lm	lm	lm	lm	lm	lm	lm	ll	lm	lm	lm	lm	lm	lm	ll	lm	lm	lm	lm	ll	lm	ll	lm
Marker4621	<lmxll>	ll	ll	lm	lm	lm	lm	ll	lm	lm	ll	lm	lm	lm	ll	ll	lm	lm	lm	lm	lm	ll	lm	lm	lm	lm	lm	lm	lm	lm	lm	ll	lm	ll	lm	lm	lm	lm	lm	lm	ll	lm	lm	lm	lm	ll	lm	ll	lm
Marker3769	<lmxll>	ll	ll	lm	lm	lm	lm	ll	lm	lm	ll	lm	lm	lm	ll	ll	lm	lm	lm	lm	lm	ll	lm	lm	lm	lm	lm	lm	lm	lm	lm	ll	lm	ll	lm	lm	lm	lm	lm	lm	ll	lm	lm	lm	lm	ll	lm	ll	lm
Marker11522	<lmxll>	lm	lm	ll	ll	ll	ll	lm	ll	ll	lm	ll	ll	ll	lm	lm	ll	ll	ll	ll	ll	lm	ll	ll	ll	ll	ll	ll	ll	ll	ll	lm	ll	lm	ll	ll	ll	ll	ll	ll	lm	ll	ll	ll	ll	lm	ll	lm	ll
Marker8681	<lmxll>	ll	ll	lm	lm	lm	lm	ll	lm	lm	ll	lm	lm	lm	ll	ll	lm	lm	lm	lm	lm	ll	lm	lm	lm	lm	lm	lm	lm	lm	lm	lm	lm	ll	lm	lm	lm	lm	lm	lm	ll	lm	lm	lm	lm	ll	lm	ll	lm
Marker27468	<efxeg>	--	ef	eg	ee	eg	eg	fg	ee	ee	fg	eg	eg	eg	eg	fg	ee	ee	ee	ee	ee	fg	eg	ee	eg	ee	eg	ee	--	--	ee	ee	ee	--	ee	ee	ee	ee	--	--	ef	ee	ee	--	--	--	--	--	ee
Marker2039	<nnxnp>	np	nn	nn	np	np	np	np	np	nn	np	np	nn	np	np	np	nn	nn	nn	nn	nn	np	np	nn	nn	np	np	np	nn	np	nn	nn	nn	np	nn	nn	nn	nn	np	np	np	np	nn	np	nn	np	np	np	nn
Marker16842	<lmxll>	ll	ll	lm	lm	lm	lm	ll	lm	lm	ll	lm	lm	lm	ll	ll	lm	lm	lm	lm	lm	ll	lm	lm	lm	lm	lm	lm	lm	lm	lm	lm	lm	lm	lm	lm	lm	lm	lm	lm	ll	lm	lm	lm	lm	ll	lm	ll	lm
Marker17613	<lmxll>	lm	lm	ll	ll	ll	ll	lm	ll	ll	lm	ll	ll	ll	lm	lm	ll	ll	ll	ll	ll	lm	ll	ll	ll	ll	ll	ll	ll	ll	ll	ll	ll	lm	ll	ll	ll	ll	ll	ll	lm	ll	ll	ll	ll	lm	ll	lm	ll
Marker20008	<lmxll>	lm	lm	ll	ll	ll	ll	lm	ll	ll	lm	ll	ll	ll	lm	lm	ll	ll	ll	ll	ll	lm	ll	ll	ll	ll	ll	ll	ll	ll	ll	ll	ll	lm	ll	ll	ll	ll	ll	ll	lm	ll	ll	ll	ll	lm	ll	lm	ll
Marker15945	<lmxll>	lm	lm	ll	ll	ll	ll	lm	ll	ll	lm	ll	ll	ll	lm	lm	ll	ll	ll	ll	ll	lm	ll	ll	ll	ll	ll	ll	ll	ll	ll	ll	ll	lm	ll	ll	ll	ll	ll	ll	lm	ll	ll	ll	ll	lm	ll	lm	ll
Marker5847	<lmxll>	ll	ll	lm	lm	lm	lm	ll	lm	lm	ll	lm	lm	lm	ll	ll	lm	lm	lm	lm	lm	ll	lm	lm	lm	lm	lm	lm	lm	lm	lm	lm	lm	ll	lm	lm	lm	lm	lm	lm	ll	lm	lm	lm	lm	ll	lm	ll	lm
Marker27532	<lmxll>	lm	lm	ll	ll	ll	ll	lm	ll	ll	lm	ll	ll	ll	lm	lm	ll	ll	ll	ll	ll	lm	ll	ll	ll	ll	ll	ll	ll	ll	ll	ll	ll	lm	ll	ll	ll	ll	ll	ll	lm	ll	ll	ll	ll	lm	ll	lm	ll
Marker21075	<lmxll>	ll	ll	lm	lm	lm	lm	ll	lm	lm	ll	lm	lm	lm	ll	ll	lm	lm	lm	lm	lm	ll	lm	lm	lm	lm	lm	lm	lm	lm	lm	lm	lm	ll	lm	lm	lm	lm	lm	lm	ll	lm	lm	lm	lm	ll	lm	ll	lm
Marker35756	<lmxll>	ll	ll	lm	lm	lm	lm	ll	lm	lm	ll	lm	lm	lm	ll	ll	lm	lm	lm	lm	lm	ll	lm	lm	lm	lm	lm	lm	lm	lm	lm	lm	lm	ll	lm	lm	lm	lm	lm	lm	ll	lm	lm	lm	lm	ll	lm	ll	lm
Marker20002	<lmxll>	ll	ll	lm	lm	lm	lm	ll	lm	lm	ll	lm	lm	lm	ll	ll	lm	lm	lm	lm	lm	ll	lm	lm	lm	lm	lm	lm	lm	lm	lm	lm	lm	ll	lm	lm	lm	lm	lm	lm	ll	lm	lm	lm	lm	ll	lm	ll	lm
Marker21119	<lmxll>	lm	lm	ll	ll	ll	ll	lm	ll	ll	lm	ll	ll	ll	lm	lm	ll	ll	ll	ll	ll	lm	ll	ll	ll	ll	ll	ll	ll	ll	ll	ll	ll	lm	ll	ll	ll	ll	ll	ll	lm	ll	ll	ll	ll	ll	ll	lm	ll
Marker18803	<lmxll>	lm	lm	ll	ll	ll	ll	lm	ll	ll	lm	ll	ll	ll	lm	lm	ll	ll	ll	ll	ll	lm	ll	ll	ll	ll	ll	ll	ll	ll	ll	ll	ll	lm	ll	ll	ll	ll	ll	ll	lm	ll	ll	ll	ll	ll	ll	lm	ll
Marker44110	<lmxll>	lm	lm	ll	ll	ll	ll	lm	ll	ll	lm	ll	ll	ll	lm	lm	ll	ll	ll	ll	ll	lm	ll	ll	ll	ll	ll	ll	ll	ll	ll	ll	ll	lm	ll	ll	ll	ll	ll	ll	lm	ll	ll	ll	ll	ll	ll	lm	ll
Marker11454	<lmxll>	ll	ll	lm	lm	lm	lm	ll	lm	lm	ll	lm	lm	lm	ll	ll	lm	lm	lm	lm	lm	ll	lm	lm	lm	lm	lm	lm	lm	lm	lm	lm	lm	ll	lm	lm	lm	lm	lm	lm	ll	lm	lm	lm	lm	ll	lm	ll	lm
Marker42554	<nnxnp>	np	nn	nn	nn	np	np	np	np	nn	np	np	nn	np	np	np	nn	nn	nn	nn	nn	np	np	nn	nn	np	np	np	nn	np	nn	nn	nn	np	nn	nn	nn	nn	np	np	nn	np	nn	np	nn	np	np	np	nn
Marker40864	<lmxll>	ll	ll	lm	lm	lm	lm	ll	lm	lm	ll	lm	lm	lm	ll	ll	lm	lm	lm	lm	lm	ll	lm	lm	lm	lm	lm	lm	lm	lm	lm	lm	lm	ll	lm	lm	lm	lm	lm	lm	ll	lm	lm	lm	lm	ll	lm	ll	lm
Marker18801	<lmxll>	lm	lm	ll	ll	ll	ll	lm	ll	ll	lm	ll	ll	ll	lm	lm	ll	ll	ll	ll	ll	lm	ll	ll	ll	ll	ll	ll	ll	ll	ll	ll	ll	lm	ll	ll	ll	ll	ll	ll	lm	ll	ll	ll	ll	lm	ll	lm	ll
Marker12591	<lmxll>	lm	lm	ll	ll	ll	ll	lm	ll	ll	lm	ll	ll	ll	lm	lm	ll	ll	ll	ll	ll	lm	ll	ll	ll	ll	ll	ll	ll	ll	ll	ll	ll	lm	ll	ll	ll	ll	ll	ll	lm	ll	ll	ll	ll	lm	ll	lm	ll
Marker43027	<lmxll>	lm	lm	ll	ll	ll	ll	lm	ll	ll	lm	ll	ll	ll	lm	lm	ll	ll	ll	ll	ll	lm	ll	ll	ll	ll	ll	ll	ll	ll	ll	ll	ll	lm	ll	ll	ll	ll	ll	ll	lm	ll	ll	ll	ll	lm	ll	lm	ll
Marker19720	<lmxll>	ll	ll	lm	lm	lm	lm	ll	lm	lm	ll	lm	lm	lm	ll	ll	lm	lm	lm	lm	lm	ll	lm	lm	lm	lm	lm	lm	lm	lm	lm	lm	lm	ll	lm	lm	ll	lm	lm	lm	ll	lm	lm	lm	lm	ll	ll	ll	lm
Marker21152	<efxeg>	ef	fg	ee	eg	ee	ee	fg	ee	eg	ef	ee	ee	ee	ef	ef	eg	eg	eg	ee	eg	ef	ee	eg	ee	eg	--	--	eg	eg	eg	--	eg	ef	--	eg	ee	eg	ee	--	fg	ee	eg	--	eg	--	ee	ef	ee
Marker27146	<lmxll>	ll	ll	lm	lm	lm	lm	ll	lm	lm	ll	lm	lm	lm	ll	ll	lm	lm	lm	lm	lm	ll	lm	lm	lm	lm	lm	lm	lm	lm	lm	lm	lm	ll	lm	lm	lm	lm	lm	lm	lm	lm	lm	lm	lm	ll	lm	ll	lm
Marker20468	<lmxll>	lm	lm	ll	ll	ll	ll	lm	ll	ll	lm	ll	ll	ll	lm	lm	ll	ll	ll	ll	ll	lm	ll	ll	ll	ll	ll	ll	ll	ll	ll	ll	ll	lm	ll	ll	ll	ll	ll	ll	ll	ll	ll	ll	ll	lm	ll	lm	ll
Marker2040	<nnxnp>	nn	np	np	np	nn	nn	nn	nn	np	nn	nn	np	nn	nn	nn	np	np	np	np	np	nn	nn	np	nn	nn	nn	nn	np	nn	np	nn	np	nn	np	np	np	np	nn	np	np	nn	np	nn	np	nn	nn	nn	nn
Marker20476	<lmxll>	ll	ll	lm	lm	lm	lm	ll	lm	lm	ll	lm	lm	lm	ll	ll	lm	lm	lm	lm	lm	ll	lm	lm	lm	lm	lm	lm	lm	lm	lm	lm	lm	ll	ll	lm	ll	lm	lm	lm	ll	lm	lm	lm	lm	ll	ll	ll	ll
Marker2035	<nnxnp>	nn	np	np	np	nn	nn	nn	nn	np	nn	nn	np	nn	nn	nn	np	np	np	np	np	nn	nn	np	nn	nn	nn	nn	np	nn	np	nn	np	nn	np	np	np	np	nn	nn	np	nn	np	nn	np	nn	nn	nn	nn
Marker27524	<efxeg>	--	ef	ee	ee	ee	ee	ef	--	ee	ef	ee	ee	ee	ef	ef	--	ee	ee	ee	ee	ef	ee	ee	ee	--	ee	ee	ee	ee	ee	--	ee	ef	--	ee	ee	ee	ee	ee	--	ee	ee	ee	--	--	ee	ef	ee
Marker42487	<nnxnp>	nn	np	np	np	nn	nn	nn	np	np	nn	nn	np	nn	nn	nn	np	np	np	np	np	nn	nn	np	nn	nn	nn	nn	np	nn	np	np	np	nn	np	np	np	np	nn	np	np	np	np	nn	np	np	nn	np	nn
Marker21073	<efxeg>	ef	fg	ee	eg	ee	ee	fg	ee	ee	ef	ee	eg	ee	ef	ef	ee	--	--	--	eg	ef	ee	eg	ee	eg	--	eg	eg	ee	--	--	ee	ef	--	eg	--	--	--	--	fg	--	--	--	ee	--	ee	--	--
Marker9125	<lmxll>	ll	ll	lm	lm	lm	lm	ll	lm	lm	ll	lm	lm	lm	ll	ll	lm	lm	lm	lm	lm	ll	lm	lm	lm	lm	lm	lm	lm	lm	lm	lm	ll	ll	ll	lm	ll	lm	lm	lm	ll	lm	lm	lm	lm	ll	ll	ll	ll
Marker28557	<lmxll>	lm	lm	ll	ll	ll	ll	lm	ll	ll	lm	ll	ll	ll	lm	lm	ll	ll	ll	ll	ll	lm	ll	ll	ll	ll	ll	ll	ll	ll	ll	ll	lm	lm	lm	ll	lm	ll	ll	ll	lm	ll	ll	ll	ll	lm	ll	lm	lm
Marker4376	<lmxll>	ll	ll	lm	lm	lm	lm	ll	lm	lm	ll	lm	lm	lm	ll	ll	lm	lm	lm	lm	lm	ll	lm	lm	lm	lm	lm	lm	lm	lm	lm	lm	ll	ll	ll	lm	ll	lm	lm	lm	ll	lm	lm	lm	lm	ll	ll	ll	ll
Marker14883	<nnxnp>	nn	np	nn	np	nn	nn	nn	nn	np	nn	nn	np	nn	nn	nn	nn	np	np	np	np	nn	nn	np	nn	nn	nn	np	np	nn	np	np	np	nn	nn	np	np	np	nn	np	np	nn	np	nn	np	np	nn	nn	np
Marker15955	<lmxll>	lm	lm	ll	ll	ll	lm	lm	ll	ll	lm	ll	ll	ll	lm	lm	ll	ll	ll	ll	ll	lm	ll	ll	ll	ll	ll	ll	ll	ll	ll	lm	lm	lm	ll	ll	ll	ll	ll	ll	lm	ll	lm	lm	lm	lm	ll	lm	ll
Marker28771	<lmxll>	ll	ll	lm	lm	lm	ll	ll	lm	lm	ll	lm	lm	lm	ll	ll	lm	lm	lm	lm	lm	ll	lm	lm	lm	lm	lm	lm	lm	ll	lm	ll	ll	ll	lm	lm	lm	lm	lm	lm	ll	lm	ll	ll	ll	ll	ll	ll	lm
Marker7703	<nnxnp>	np	nn	np	nn	np	np	np	np	nn	np	np	nn	np	np	np	np	nn	nn	nn	nn	np	np	nn	np	nn	np	nn	nn	np	nn	nn	nn	np	np	nn	nn	nn	np	np	nn	np	nn	np	nn	nn	np	np	nn
Marker19069	<lmxll>	ll	ll	lm	lm	lm	lm	ll	lm	lm	ll	lm	lm	lm	ll	ll	lm	lm	lm	lm	lm	ll	lm	lm	lm	lm	lm	lm	lm	lm	lm	lm	ll	ll	ll	ll	ll	lm	lm	lm	ll	lm	lm	lm	lm	ll	lm	ll	ll
Marker36696	<efxeg>	--	ee	ee	ee	ee	--	ee	--	ee	eg	eg	ee	eg	eg	ee	--	--	--	ee	ee	eg	eg	ee	ee	ee	--	eg	ee	--	ee	--	ee	eg	ee	ee	--	--	--	--	ee	--	--	--	--	--	--	--	--
Marker27470	<nnxnp>	np	nn	np	nn	np	np	np	nn	nn	np	np	np	np	np	np	nn	nn	nn	nn	nn	np	np	nn	nn	nn	np	nn	nn	nn	nn	nn	nn	np	nn	nn	nn	nn	np	nn	nn	nn	nn	np	nn	nn	np	nn	nn
Marker20471	<lmxll>	ll	ll	lm	lm	lm	lm	ll	lm	lm	ll	lm	lm	lm	ll	ll	lm	ll	lm	lm	lm	ll	lm	ll	lm	ll	lm	lm	lm	lm	lm	ll	lm	ll	ll	lm	ll	lm	lm	ll	ll	lm	ll	lm	ll	ll	lm	ll	ll
Marker17617	<nnxnp>	nn	np	nn	np	nn	nn	nn	nn	np	nn	nn	nn	nn	nn	nn	nn	np	np	nn	np	nn	nn	np	nn	np	nn	np	np	np	np	np	nn	nn	nn	np	np	np	nn	np	np	nn	np	nn	np	np	nn	nn	np
Marker21071	<lmxll>	ll	ll	lm	lm	lm	ll	ll	lm	lm	ll	lm	lm	lm	ll	ll	lm	lm	lm	lm	lm	ll	lm	lm	ll	lm	lm	lm	lm	ll	lm	ll	ll	ll	lm	lm	lm	lm	lm	lm	ll	lm	lm	lm	ll	ll	ll	ll	ll
Marker17618	<nnxnp>	nn	np	nn	np	nn	nn	nn	nn	np	nn	nn	nn	nn	nn	nn	nn	np	np	nn	np	nn	nn	np	nn	np	nn	np	np	np	np	np	nn	nn	nn	np	np	np	nn	nn	np	nn	np	nn	nn	np	nn	nn	np
Marker19068	<lmxll>	ll	ll	lm	lm	lm	ll	ll	lm	lm	ll	lm	lm	lm	ll	ll	lm	lm	lm	lm	lm	ll	lm	lm	ll	lm	lm	lm	lm	ll	lm	ll	ll	ll	lm	lm	lm	lm	lm	lm	ll	lm	lm	lm	ll	ll	ll	ll	ll
Marker22785	<lmxll>	ll	ll	lm	lm	lm	ll	ll	lm	lm	ll	lm	lm	lm	ll	ll	lm	lm	lm	lm	lm	ll	ll	lm	ll	lm	lm	lm	lm	lm	lm	ll	ll	ll	lm	lm	lm	lm	lm	lm	ll	lm	lm	lm	lm	ll	ll	ll	ll
Marker8607	<lmxll>	lm	lm	ll	ll	ll	lm	lm	ll	ll	lm	ll	ll	ll	lm	lm	ll	ll	ll	ll	ll	lm	lm	ll	lm	ll	ll	ll	ll	ll	ll	lm	lm	lm	ll	lm	ll	ll	ll	ll	lm	ll	ll	ll	ll	lm	lm	lm	lm
Marker21121	<nnxnp>	np	nn	np	nn	np	np	nn	np	nn	np	np	np	np	np	np	nn	nn	nn	np	nn	np	np	nn	np	nn	np	nn	nn	nn	nn	nn	nn	np	nn	nn	np	nn	np	nn	nn	np	nn	np	nn	nn	np	np	np
Marker21120	<nnxnp>	np	nn	np	nn	np	np	nn	np	nn	np	np	np	np	np	np	nn	nn	nn	np	nn	np	np	nn	np	nn	np	nn	nn	nn	nn	nn	nn	np	nn	nn	np	nn	np	nn	nn	np	nn	np	nn	nn	np	np	np
Marker21110	<abxcd>	ad	bc	bd	ac	bd	bd	--	--	bc	ad	bd	bd	--	ad	ad	--	bc	bd	--	bc	--	bd	bc	--	bc	--	--	bc	--	bc	--	ac	ad	--	--	ad	bc	--	--	--	--	ac	ad	--	--	ad	--	--
Marker25227	<nnxnp>	np	nn	np	nn	np	np	nn	np	nn	np	np	np	np	np	np	nn	nn	nn	np	nn	np	np	nn	np	nn	np	nn	nn	nn	nn	nn	nn	np	nn	nn	np	nn	np	nn	nn	np	nn	np	nn	nn	np	np	nn
Marker5936	<lmxll>	ll	ll	lm	lm	lm	lm	ll	lm	lm	ll	lm	lm	lm	ll	ll	lm	ll	lm	ll	lm	ll	lm	ll	lm	ll	lm	lm	lm	lm	lm	ll	lm	ll	ll	lm	ll	lm	lm	ll	ll	lm	ll	lm	ll	ll	lm	ll	ll
Marker20496	<nnxnp>	np	nn	np	nn	np	nn	nn	np	nn	np	np	np	np	np	np	nn	nn	nn	np	nn	np	np	nn	np	nn	np	nn	nn	nn	nn	nn	nn	np	nn	nn	np	nn	np	nn	nn	nn	nn	np	nn	nn	np	np	nn
Marker14792	<lmxll>	lm	lm	ll	ll	ll	lm	lm	ll	ll	lm	ll	ll	ll	lm	lm	ll	ll	ll	ll	ll	lm	lm	ll	lm	ll	ll	ll	ll	ll	ll	lm	lm	lm	ll	lm	ll	ll	ll	ll	lm	ll	ll	ll	ll	lm	lm	lm	lm
Marker22875	<lmxll>	lm	lm	ll	ll	ll	lm	lm	ll	ll	lm	ll	ll	ll	lm	lm	ll	ll	ll	ll	ll	lm	lm	ll	lm	ll	ll	ll	ll	ll	ll	lm	lm	lm	ll	lm	ll	ll	ll	ll	lm	ll	ll	ll	ll	lm	lm	lm	lm
Marker5574	<lmxll>	ll	ll	lm	lm	lm	lm	ll	lm	lm	ll	lm	lm	lm	ll	ll	lm	ll	lm	ll	lm	ll	lm	ll	lm	ll	lm	ll	lm	lm	lm	ll	lm	ll	ll	lm	ll	lm	lm	ll	ll	lm	ll	lm	ll	ll	lm	ll	ll
Marker20478	<efxeg>	ee	ee	ef	ef	--	ee	ee	--	--	ee	ef	ef	ee	ee	ee	--	ef	ef	ee	ef	ee	--	--	ee	ef	ee	--	ef	ee	ef	ee	--	ee	--	--	--	--	--	--	ee	ee	ee	ee	--	ee	--	--	--
Marker8624	<efxeg>	ee	ee	ef	ef	ef	ee	ee	--	ef	ee	ef	ef	ee	ee	ee	--	ef	ef	ef	ef	ee	ef	ef	--	ef	ef	ef	ef	ef	ef	ef	--	--	ef	ee	ee	ef	ef	--	ee	ef	ef	ef	ef	ee	ee	ee	--
Marker17612	<efxeg>	--	ee	eg	ee	eg	ee	--	--	ee	--	eg	--	eg	ee	--	ee	ee	ee	eg	ee	--	eg	ee	--	ee	--	ee	ee	--	ee	--	ee	eg	--	ee	eg	ee	ee	--	ee	--	ee	ee	ee	ee	ee	ee	ee
Marker23465	<lmxll>	lm	lm	ll	ll	ll	ll	lm	ll	lm	lm	ll	ll	ll	lm	lm	ll	lm	ll	lm	lm	lm	ll	lm	ll	lm	ll	lm	lm	ll	ll	lm	ll	lm	lm	lm	lm	lm	ll	lm	lm	ll	lm	ll	lm	lm	ll	lm	lm
Marker12589	<lmxll>	lm	lm	ll	ll	ll	ll	lm	ll	lm	lm	ll	ll	ll	lm	lm	ll	lm	ll	lm	lm	lm	ll	lm	ll	lm	ll	lm	lm	ll	ll	lm	ll	lm	lm	lm	lm	lm	ll	lm	lm	ll	lm	ll	lm	lm	ll	lm	lm
Marker270	<lmxll>	lm	lm	ll	ll	ll	ll	lm	ll	lm	lm	ll	ll	ll	lm	lm	ll	lm	ll	lm	lm	lm	ll	lm	ll	lm	ll	lm	lm	ll	ll	lm	ll	lm	lm	lm	lm	lm	ll	lm	lm	ll	lm	ll	lm	lm	ll	lm	lm
Marker27481	<lmxll>	lm	lm	ll	lm	ll	ll	lm	ll	lm	lm	ll	ll	ll	lm	lm	ll	lm	lm	lm	lm	lm	ll	lm	ll	lm	ll	lm	lm	ll	lm	lm	lm	lm	lm	lm	lm	lm	ll	lm	lm	ll	lm	ll	lm	lm	ll	lm	lm
Marker8801	<efxeg>	ef	ee	ee	ef	ee	ee	ee	--	ee	ef	ee	ef	--	ef	--	--	ee	ee	ee	ee	ee	ee	ef	--	ef	ee	ee	ef	ee	--	--	ee	ef	--	--	ee	ef	ee	ee	ef	ee	ee	ee	--	ee	ee	ee	ee
Marker7204	<lmxll>	lm	ll	ll	lm	ll	ll	ll	ll	lm	lm	ll	lm	lm	ll	lm	lm	ll	ll	ll	ll	ll	ll	lm	lm	lm	ll	ll	lm	lm	ll	ll	lm	lm	lm	lm	ll	lm	ll	ll	lm	ll	ll	ll	lm	ll	ll	ll	lm
Marker28384	<lmxll>	lm	ll	ll	lm	ll	ll	ll	ll	lm	lm	ll	lm	lm	ll	lm	lm	ll	ll	ll	ll	ll	ll	lm	lm	lm	ll	ll	lm	lm	ll	ll	lm	lm	lm	lm	ll	lm	ll	ll	lm	ll	ll	ll	lm	ll	ll	ll	lm
Marker16367	<nnxnp>	np	nn	np	np	nn	nn	np	nn	nn	np	nn	nn	nn	np	np	nn	np	nn	nn	nn	np	nn	np	nn	nn	np	np	np	nn	nn	np	nn	np	nn	np	nn	np	np	nn	np	np	nn	nn	nn	nn	np	np	nn
Marker42687	<nnxnp>	np	nn	np	np	nn	nn	np	nn	nn	np	nn	nn	nn	np	np	nn	np	nn	nn	nn	np	nn	np	nn	nn	np	np	np	nn	nn	np	nn	np	nn	np	nn	np	np	nn	np	np	nn	nn	nn	nn	np	np	nn
Marker12745	<lmxll>	lm	ll	ll	lm	ll	ll	ll	ll	lm	lm	ll	lm	lm	ll	lm	lm	ll	ll	ll	ll	ll	ll	lm	lm	lm	ll	ll	lm	lm	ll	ll	lm	lm	lm	lm	ll	lm	ll	ll	lm	ll	ll	ll	lm	ll	ll	ll	ll
Marker18101	<lmxll>	lm	ll	ll	lm	ll	ll	ll	ll	lm	lm	ll	lm	lm	ll	lm	lm	ll	ll	ll	ll	ll	ll	lm	lm	lm	ll	ll	lm	lm	ll	ll	lm	lm	lm	lm	ll	lm	ll	ll	lm	ll	ll	ll	lm	ll	ll	ll	ll
Marker8795	<efxeg>	ef	eg	ee	ef	eg	eg	--	eg	--	ef	eg	fg	fg	eg	ef	--	--	eg	eg	eg	eg	eg	--	fg	fg	--	ee	ef	fg	eg	ee	--	ef	fg	--	eg	ef	ee	ef	--	--	ee	eg	--	--	ee	ee	fg
Marker18099	<lmxll>	lm	ll	ll	lm	ll	ll	ll	ll	ll	lm	ll	lm	lm	ll	lm	lm	ll	ll	ll	ll	ll	ll	lm	lm	lm	ll	ll	lm	lm	ll	lm	lm	lm	lm	lm	ll	lm	ll	ll	lm	ll	ll	ll	lm	ll	ll	ll	lm
Marker31542	<lmxll>	lm	ll	ll	lm	ll	ll	ll	ll	ll	lm	ll	lm	lm	ll	lm	lm	ll	ll	ll	ll	ll	ll	lm	lm	lm	ll	ll	lm	lm	ll	lm	lm	lm	lm	lm	ll	lm	ll	ll	lm	ll	ll	ll	lm	ll	ll	ll	lm
Marker43293	<lmxll>	lm	ll	ll	lm	ll	ll	ll	ll	lm	lm	ll	lm	lm	ll	lm	lm	ll	ll	ll	ll	ll	ll	lm	lm	lm	ll	ll	lm	lm	ll	ll	lm	lm	lm	lm	ll	lm	ll	ll	lm	ll	ll	ll	lm	ll	ll	ll	lm
Marker41148	<lmxll>	ll	lm	lm	ll	lm	lm	lm	lm	ll	ll	lm	ll	ll	lm	ll	ll	lm	lm	lm	lm	lm	lm	ll	ll	ll	lm	lm	ll	ll	lm	lm	ll	ll	ll	ll	lm	ll	lm	lm	ll	lm	lm	lm	ll	lm	lm	lm	lm
Marker31533	<nnxnp>	np	nn	np	np	nn	nn	nn	nn	nn	np	nn	nn	nn	nn	np	nn	np	nn	nn	nn	np	nn	np	nn	nn	nn	np	np	nn	nn	np	nn	np	nn	np	nn	np	np	nn	np	np	nn	nn	nn	nn	np	np	nn
Marker27641	<lmxll>	lm	ll	ll	lm	ll	ll	ll	ll	lm	lm	ll	lm	lm	ll	lm	lm	ll	ll	ll	ll	ll	ll	lm	lm	lm	ll	ll	lm	lm	ll	lm	lm	lm	lm	lm	ll	lm	ll	ll	lm	ll	ll	ll	lm	ll	ll	ll	lm
Marker31563	<nnxnp>	np	nn	np	np	nn	nn	nn	nn	nn	np	nn	nn	nn	nn	np	nn	np	nn	nn	nn	np	nn	nn	nn	nn	nn	np	np	nn	nn	np	nn	np	nn	np	nn	np	np	nn	np	np	nn	nn	nn	nn	np	np	nn
Marker26956	<lmxll>	lm	ll	ll	lm	ll	ll	ll	ll	lm	lm	ll	lm	lm	ll	lm	lm	ll	ll	ll	ll	ll	ll	lm	lm	lm	ll	ll	lm	lm	ll	lm	lm	lm	lm	lm	ll	lm	ll	ll	lm	ll	ll	ll	lm	ll	ll	ll	lm
Marker45442	<nnxnp>	nn	np	nn	nn	np	np	np	np	np	nn	np	np	np	np	nn	np	nn	np	np	np	nn	np	np	np	np	np	nn	nn	np	np	nn	np	nn	np	nn	np	nn	nn	np	nn	nn	np	np	np	np	nn	nn	np
Marker44034	<lmxll>	lm	ll	ll	lm	ll	ll	ll	ll	ll	lm	ll	lm	lm	ll	lm	lm	ll	ll	ll	ll	ll	ll	lm	lm	lm	ll	ll	lm	lm	ll	lm	lm	lm	lm	lm	ll	lm	ll	ll	lm	ll	ll	ll	lm	ll	ll	ll	lm
Marker16167	<lmxll>	lm	ll	ll	lm	ll	ll	ll	ll	ll	lm	ll	lm	lm	ll	lm	lm	ll	ll	ll	ll	ll	ll	lm	lm	lm	ll	ll	lm	lm	ll	ll	lm	lm	lm	lm	ll	lm	ll	ll	lm	ll	ll	ll	lm	ll	ll	ll	lm
Marker7678	<lmxll>	lm	ll	ll	lm	ll	ll	ll	ll	lm	lm	ll	lm	lm	ll	lm	lm	ll	ll	ll	ll	ll	ll	lm	lm	lm	ll	ll	lm	lm	ll	ll	lm	lm	lm	lm	ll	lm	ll	ll	lm	ll	ll	ll	lm	ll	ll	ll	lm
Marker3623	<lmxll>	lm	ll	ll	lm	ll	ll	ll	ll	ll	lm	ll	lm	lm	ll	lm	lm	ll	ll	ll	ll	ll	ll	lm	lm	lm	ll	ll	lm	lm	ll	ll	lm	lm	lm	lm	ll	lm	ll	ll	lm	ll	ll	ll	lm	ll	ll	ll	lm
Marker22024	<lmxll>	ll	lm	lm	ll	lm	lm	lm	lm	lm	ll	lm	ll	ll	lm	ll	ll	lm	lm	lm	lm	lm	lm	ll	ll	ll	lm	lm	ll	ll	lm	lm	ll	ll	ll	ll	lm	ll	lm	lm	ll	lm	lm	lm	ll	lm	lm	lm	ll
Marker36439	<lmxll>	ll	lm	lm	ll	lm	lm	lm	lm	ll	ll	lm	ll	ll	lm	ll	ll	lm	lm	lm	lm	lm	lm	ll	ll	ll	lm	lm	ll	ll	lm	lm	ll	ll	ll	ll	lm	ll	lm	lm	ll	lm	lm	lm	ll	lm	lm	lm	ll
Marker26941	<lmxll>	lm	ll	ll	lm	ll	ll	ll	ll	lm	lm	ll	lm	lm	ll	lm	lm	ll	ll	ll	ll	ll	ll	lm	lm	lm	ll	ll	lm	lm	ll	ll	lm	lm	lm	lm	ll	lm	ll	ll	lm	ll	ll	ll	lm	ll	ll	ll	lm
Marker31529	<efxeg>	eg	ef	fg	eg	ef	ef	ef	--	ef	eg	ef	--	ee	ef	eg	--	--	ef	ef	ef	fg	ef	ee	ee	--	ef	fg	eg	ee	ef	--	ee	eg	ee	--	ef	eg	fg	ee	eg	--	--	ef	--	--	--	fg	ee
Marker31543	<abxcd>	bc	ad	ac	bc	ad	ad	ad	ad	--	bc	ad	bd	bd	ad	bc	--	ac	ad	ad	ad	ac	ad	bd	bd	bd	ad	ac	--	bd	ad	--	--	bc	--	--	ad	bc	--	--	--	--	--	--	--	--	ac	ac	bd
Marker31547	<lmxll>	lm	ll	ll	lm	ll	ll	ll	ll	ll	lm	ll	lm	lm	ll	lm	lm	ll	ll	ll	ll	ll	ll	lm	lm	lm	ll	ll	lm	lm	ll	ll	lm	lm	lm	lm	ll	lm	ll	ll	lm	ll	ll	ll	lm	ll	ll	ll	lm
Marker8826	<nnxnp>	np	nn	np	np	nn	nn	nn	nn	nn	np	nn	nn	nn	nn	np	nn	np	nn	nn	nn	np	nn	nn	nn	nn	nn	np	np	nn	nn	np	nn	np	nn	np	nn	np	np	nn	np	np	nn	nn	nn	nn	np	np	nn
Marker18073	<lmxll>	ll	lm	lm	ll	lm	lm	lm	lm	lm	ll	lm	ll	ll	lm	ll	ll	lm	lm	lm	lm	lm	lm	ll	ll	ll	lm	lm	ll	ll	lm	lm	ll	ll	ll	ll	lm	ll	lm	lm	ll	lm	lm	lm	ll	lm	lm	lm	ll
Marker8825	<nnxnp>	np	nn	np	np	nn	nn	nn	nn	nn	np	nn	nn	nn	nn	np	nn	np	nn	nn	nn	np	nn	nn	nn	nn	nn	np	np	nn	nn	np	nn	np	nn	np	nn	np	np	nn	np	np	nn	nn	nn	nn	np	np	nn
Marker8811	<lmxll>	lm	ll	ll	lm	ll	ll	ll	ll	lm	lm	ll	lm	lm	ll	lm	lm	ll	ll	ll	ll	ll	ll	lm	lm	lm	ll	ll	lm	lm	ll	lm	lm	lm	lm	lm	ll	lm	ll	ll	lm	ll	ll	ll	lm	ll	ll	ll	lm
Marker31567	<lmxll>	lm	ll	ll	lm	ll	ll	ll	ll	lm	lm	ll	lm	lm	ll	lm	lm	ll	ll	ll	ll	ll	ll	lm	lm	lm	ll	ll	lm	lm	ll	lm	lm	lm	lm	lm	ll	lm	ll	ll	lm	ll	ll	ll	lm	ll	ll	ll	lm
Marker44036	<lmxll>	ll	lm	lm	ll	lm	lm	lm	lm	ll	ll	lm	ll	ll	lm	ll	ll	lm	lm	lm	lm	lm	lm	ll	ll	ll	lm	lm	ll	ll	lm	ll	ll	ll	ll	ll	lm	ll	lm	lm	ll	lm	lm	lm	ll	lm	lm	lm	ll
Marker44170	<lmxll>	ll	lm	lm	ll	lm	lm	lm	lm	ll	ll	lm	ll	ll	lm	ll	ll	lm	lm	lm	lm	lm	lm	ll	ll	ll	lm	lm	ll	ll	lm	ll	ll	ll	ll	ll	lm	ll	lm	lm	ll	lm	lm	lm	ll	lm	lm	lm	ll
Marker31560	<abxcd>	ad	bc	bd	ac	--	bd	bd	--	--	ad	bc	ac	--	bc	ad	--	bd	--	bc	bc	--	--	--	--	--	bd	--	--	ac	--	--	ad	ad	--	--	bc	ad	--	--	--	--	--	--	--	bd	--	--	--
Marker7448	<abxcd>	--	--	--	ad	bc	--	bc	bd	--	ad	bc	ac	ac	bc	ad	--	bd	bc	bd	bc	bd	bc	ac	ad	ac	bd	bd	ad	ac	bc	--	ad	ad	--	--	--	--	--	bd	--	--	--	bd	--	bd	bd	--	ad
Marker27644	<lmxll>	ll	lm	lm	ll	lm	lm	lm	lm	lm	ll	lm	ll	ll	lm	ll	ll	lm	lm	lm	lm	lm	lm	ll	ll	ll	lm	lm	ll	ll	lm	lm	ll	ll	ll	ll	lm	ll	lm	lm	ll	lm	lm	lm	ll	lm	lm	lm	ll
Marker2655	<lmxll>	ll	lm	lm	ll	lm	lm	lm	lm	lm	ll	lm	ll	ll	lm	ll	ll	lm	lm	lm	lm	lm	lm	ll	ll	ll	lm	lm	ll	ll	lm	lm	ll	ll	ll	ll	lm	ll	lm	lm	ll	lm	lm	lm	ll	lm	lm	lm	ll
Marker31537	<lmxll>	ll	lm	lm	ll	lm	lm	lm	lm	lm	ll	lm	ll	ll	lm	ll	ll	lm	lm	lm	lm	lm	lm	ll	ll	ll	lm	lm	ll	ll	lm	lm	ll	ll	ll	ll	lm	ll	lm	lm	ll	lm	lm	lm	ll	lm	lm	lm	ll
Marker8945	<nnxnp>	np	nn	nn	np	np	np	np	np	np	nn	np	np	nn	np	np	np	nn	np	nn	np	nn	np	np	np	np	np	nn	np	np	np	np	np	nn	np	nn	np	np	np	np	nn	nn	np	np	np	np	nn	nn	np
Marker44037	<lmxll>	lm	ll	ll	lm	ll	ll	ll	ll	ll	lm	ll	lm	lm	ll	lm	lm	ll	ll	ll	ll	ll	ll	lm	lm	lm	ll	ll	lm	lm	ll	lm	lm	lm	lm	lm	ll	lm	ll	ll	lm	ll	ll	ll	lm	ll	ll	ll	lm
Marker35219	<lmxll>	ll	lm	lm	ll	lm	lm	lm	lm	lm	ll	lm	ll	ll	lm	ll	ll	lm	lm	lm	lm	lm	lm	ll	ll	ll	lm	lm	ll	ll	lm	ll	ll	ll	ll	ll	lm	ll	lm	lm	ll	lm	lm	lm	ll	lm	lm	lm	ll
Marker28131	<efxeg>	ef	eg	ee	ef	eg	eg	eg	eg	eg	ef	eg	--	fg	eg	ef	--	ee	eg	eg	eg	ee	eg	fg	fg	--	eg	ee	ef	fg	eg	ee	fg	ef	fg	--	eg	ef	ee	eg	ef	--	ee	eg	--	eg	ee	ee	fg
Marker18560	<lmxll>	ll	lm	lm	ll	lm	lm	lm	lm	lm	ll	lm	ll	ll	lm	ll	ll	lm	lm	lm	lm	lm	lm	ll	ll	ll	lm	lm	ll	ll	lm	ll	ll	ll	ll	ll	ll	ll	lm	lm	ll	lm	lm	ll	ll	ll	lm	lm	ll
Marker35987	<lmxll>	ll	lm	lm	ll	lm	lm	lm	lm	lm	ll	lm	ll	ll	lm	ll	ll	lm	lm	lm	lm	lm	lm	ll	ll	ll	lm	lm	ll	ll	lm	ll	ll	ll	ll	ll	ll	ll	lm	lm	ll	lm	lm	lm	ll	ll	lm	lm	ll
Marker11871	<abxcd>	bd	ad	--	bd	ac	ac	ac	ac	ac	bd	ac	bc	bc	ac	bd	bc	ad	ac	ac	ac	ad	ac	bc	bd	bc	ac	--	bd	bc	ac	--	--	bd	bc	bd	--	bd	ad	ac	--	ad	--	--	bc	--	ad	--	--
Marker25849	<lmxll>	ll	lm	lm	ll	lm	lm	lm	lm	lm	ll	lm	ll	ll	lm	ll	ll	lm	lm	lm	lm	lm	lm	ll	ll	ll	lm	lm	ll	ll	lm	ll	ll	ll	ll	ll	lm	ll	lm	lm	ll	lm	lm	lm	ll	ll	lm	lm	ll
Marker25850	<lmxll>	ll	lm	lm	ll	lm	lm	lm	lm	lm	ll	lm	ll	ll	lm	ll	ll	lm	lm	lm	lm	lm	lm	ll	ll	ll	lm	lm	ll	ll	lm	ll	ll	ll	ll	ll	lm	ll	lm	lm	ll	lm	lm	lm	ll	ll	lm	lm	ll
Marker13411	<lmxll>	lm	ll	ll	lm	ll	ll	ll	ll	ll	lm	ll	lm	lm	ll	lm	lm	ll	ll	ll	ll	ll	ll	lm	lm	lm	ll	ll	lm	lm	ll	ll	lm	lm	lm	lm	ll	lm	ll	ll	lm	ll	ll	ll	lm	ll	ll	ll	lm
Marker28130	<nnxnp>	nn	np	nn	nn	np	np	np	np	np	nn	np	np	np	np	nn	np	nn	np	np	np	nn	np	np	np	np	np	nn	nn	np	np	np	np	nn	np	nn	np	nn	nn	np	nn	nn	np	np	np	np	nn	nn	np
Marker13150	<lmxll>	lm	ll	ll	lm	ll	ll	ll	ll	ll	lm	ll	lm	lm	ll	lm	lm	ll	ll	ll	ll	ll	ll	lm	lm	lm	ll	ll	lm	lm	ll	lm	lm	lm	lm	lm	lm	lm	ll	ll	lm	ll	ll	lm	lm	lm	ll	ll	lm
Marker22553	<lmxll>	ll	lm	lm	ll	lm	lm	lm	ll	lm	ll	lm	ll	ll	lm	ll	ll	lm	lm	lm	lm	lm	lm	ll	ll	ll	lm	lm	ll	ll	lm	ll	ll	ll	ll	ll	lm	ll	lm	lm	ll	lm	lm	lm	ll	lm	lm	lm	ll
Marker32118	<nnxnp>	nn	np	np	nn	nn	nn	nn	nn	nn	np	nn	nn	np	nn	nn	nn	np	nn	np	nn	np	nn	nn	nn	nn	nn	np	nn	nn	nn	np	nn	np	nn	np	nn	nn	nn	nn	np	np	nn	nn	nn	nn	np	np	nn
Marker43279	<lmxll>	lm	ll	ll	lm	ll	ll	ll	ll	ll	lm	ll	lm	lm	ll	lm	lm	ll	ll	ll	ll	ll	ll	lm	lm	lm	ll	ll	lm	lm	ll	lm	lm	lm	lm	lm	ll	lm	lm	ll	lm	ll	ll	ll	lm	lm	ll	ll	lm
Marker41985	<nnxnp>	np	nn	np	np	nn	nn	nn	nn	nn	np	nn	nn	nn	nn	np	nn	np	nn	np	nn	np	nn	nn	nn	nn	nn	np	nn	nn	nn	np	nn	np	np	np	nn	nn	np	nn	np	np	nn	nn	nn	nn	np	np	nn
Marker5355	<lmxll>	ll	lm	lm	ll	lm	lm	lm	lm	lm	ll	lm	ll	ll	lm	ll	ll	lm	lm	lm	lm	lm	lm	ll	ll	ll	lm	lm	ll	ll	lm	ll	ll	ll	ll	ll	ll	ll	ll	lm	ll	lm	lm	lm	ll	ll	lm	lm	ll
Marker49930	<nnxnp>	np	np	np	np	nn	nn	nn	nn	nn	np	nn	nn	nn	nn	np	nn	np	nn	nn	nn	np	nn	nn	nn	nn	nn	np	nn	nn	nn	nn	nn	np	nn	np	nn	np	np	nn	np	np	nn	nn	nn	nn	np	np	nn
Marker11879	<efxeg>	eg	fg	fg	eg	ef	--	--	ef	ef	eg	ef	ee	ee	ef	eg	ee	fg	ef	ef	ef	eg	ee	ee	ee	ee	ef	--	--	ee	ef	--	ee	eg	ee	eg	ef	eg	--	--	eg	--	ef	--	ee	ee	--	fg	ee
Marker19547	<lmxll>	ll	lm	lm	ll	lm	lm	lm	lm	lm	ll	lm	ll	ll	lm	ll	ll	lm	lm	lm	lm	lm	lm	ll	ll	ll	lm	lm	ll	ll	lm	ll	ll	ll	ll	ll	lm	ll	ll	lm	ll	lm	lm	lm	ll	lm	lm	lm	ll
Marker32076	<lmxll>	ll	lm	ll	ll	lm	lm	lm	lm	lm	ll	lm	ll	ll	lm	ll	ll	lm	lm	lm	lm	lm	lm	ll	ll	ll	lm	lm	ll	ll	lm	ll	ll	ll	ll	ll	lm	ll	lm	lm	ll	lm	lm	lm	ll	lm	lm	lm	ll
Marker30600	<lmxll>	ll	lm	ll	ll	lm	lm	lm	lm	lm	ll	lm	ll	ll	lm	ll	ll	lm	lm	lm	lm	lm	lm	ll	ll	ll	lm	lm	ll	ll	lm	ll	ll	ll	ll	ll	lm	ll	ll	lm	ll	lm	lm	lm	ll	lm	lm	lm	ll
Marker8508	<nnxnp>	nn	nn	np	np	nn	nn	nn	nn	nn	np	nn	nn	nn	nn	np	nn	np	nn	np	nn	np	nn	nn	nn	nn	nn	np	nn	nn	nn	np	nn	np	np	np	nn	nn	nn	nn	np	np	nn	nn	nn	nn	np	np	nn
Marker18085	<nnxnp>	nn	nn	np	np	nn	nn	nn	nn	nn	np	nn	nn	nn	nn	np	nn	np	nn	np	nn	np	nn	nn	nn	nn	nn	np	nn	nn	nn	np	nn	np	np	np	nn	nn	nn	nn	np	np	nn	nn	nn	nn	np	np	nn
Marker7433	<abxcd>	ad	bd	--	ad	bc	bc	bc	bc	bc	ad	bc	ac	ac	bc	--	ac	bd	bc	bd	bc	--	bc	ac	ac	ac	bc	bd	ac	--	bc	--	ac	ad	--	ad	--	--	--	--	--	--	--	--	--	bc	--	--	--
Marker13132	<efxeg>	ee	ef	ef	ee	--	--	fg	--	--	ee	fg	eg	eg	--	ee	--	ef	fg	ef	fg	ef	--	eg	eg	eg	fg	ef	eg	eg	fg	ee	eg	ee	ee	ee	fg	ee	ef	fg	ee	ef	--	fg	eg	fg	ef	ef	eg
Marker13405	<lmxll>	ll	lm	ll	ll	lm	lm	lm	lm	lm	ll	lm	ll	ll	lm	ll	ll	lm	lm	lm	lm	lm	lm	ll	ll	ll	lm	lm	ll	ll	lm	ll	ll	ll	ll	ll	lm	ll	lm	lm	ll	lm	lm	lm	ll	lm	lm	lm	ll
Marker8479	<nnxnp>	nn	np	np	nn	nn	nn	nn	nn	nn	np	nn	nn	np	nn	np	nn	np	nn	np	nn	np	nn	nn	nn	nn	nn	np	nn	nn	nn	np	nn	np	np	np	nn	nn	nn	nn	np	np	nn	nn	nn	nn	np	np	nn
Marker19506	<abxcd>	--	ac	bc	bc	--	ad	--	ad	--	bc	--	--	--	--	bc	--	ac	--	--	--	bd	bd	--	--	bd	--	--	--	bd	ad	--	bd	--	--	bd	--	--	--	--	bd	--	--	--	--	--	--	--	ad
Marker41982	<nnxnp>	nn	nn	nn	nn	np	np	np	np	np	nn	np	np	np	np	nn	nn	nn	np	nn	np	nn	np	np	np	np	np	nn	np	np	np	nn	np	nn	nn	nn	np	nn	nn	nn	nn	nn	np	np	np	nn	np	nn	np
Marker17124	<lmxll>	lm	ll	lm	lm	ll	ll	ll	ll	ll	lm	ll	lm	lm	ll	lm	lm	ll	ll	ll	ll	lm	ll	lm	lm	lm	ll	ll	lm	lm	ll	lm	lm	lm	lm	lm	ll	lm	ll	ll	lm	ll	ll	ll	lm	ll	ll	ll	lm
Marker32980	<lmxll>	lm	ll	lm	lm	ll	ll	ll	ll	ll	lm	ll	lm	lm	ll	lm	lm	ll	ll	ll	ll	lm	ll	lm	lm	lm	ll	ll	lm	lm	ll	lm	lm	lm	lm	lm	ll	lm	ll	ll	lm	ll	ll	ll	lm	ll	ll	ll	lm
Marker8256	<nnxnp>	nn	nn	nn	nn	np	np	np	np	np	np	np	np	np	np	nn	nn	nn	np	nn	np	nn	np	np	np	np	np	nn	np	np	np	nn	np	nn	nn	nn	np	nn	nn	nn	nn	nn	np	np	nn	nn	np	nn	np
Marker41379	<nnxnp>	np	np	np	np	nn	nn	nn	nn	nn	np	nn	nn	nn	nn	np	nn	np	nn	np	nn	np	nn	nn	nn	nn	nn	np	nn	nn	nn	nn	nn	np	np	np	nn	np	np	nn	np	np	nn	nn	nn	nn	np	np	nn
Marker13140	<nnxnp>	np	np	np	np	nn	np	nn	nn	nn	np	nn	nn	nn	nn	np	nn	np	nn	np	nn	np	nn	nn	nn	nn	nn	np	nn	nn	nn	nn	nn	np	np	np	nn	np	np	nn	np	np	nn	nn	nn	nn	np	np	nn
Marker127	<nnxnp>	np	np	np	np	nn	np	nn	nn	nn	np	nn	nn	np	nn	np	nn	np	nn	np	nn	np	nn	nn	nn	nn	nn	np	nn	nn	nn	nn	nn	np	np	np	nn	np	np	nn	np	np	nn	nn	nn	nn	np	np	nn
Marker30763	<nnxnp>	np	np	np	np	nn	np	nn	nn	nn	np	nn	nn	np	nn	np	nn	np	nn	np	nn	np	nn	nn	nn	nn	nn	np	nn	nn	nn	nn	nn	np	np	np	nn	np	np	nn	np	np	nn	nn	nn	nn	np	np	nn
Marker8476	<efxeg>	fg	eg	fg	fg	ee	ee	ee	--	ee	fg	ee	ef	fg	ee	fg	ee	eg	ee	eg	ee	fg	ef	ef	--	ef	--	eg	ef	ef	ee	--	--	fg	fg	fg	ee	fg	eg	ee	fg	ee	ee	--	--	ee	eg	eg	ef
Marker18563	<nnxnp>	nn	nn	nn	nn	np	np	np	np	np	nn	np	np	np	np	nn	np	nn	np	nn	np	nn	np	np	np	np	np	nn	np	np	np	nn	np	nn	nn	nn	np	nn	nn	np	nn	nn	np	np	np	np	np	nn	np
Marker32635	<nnxnp>	np	np	np	np	nn	nn	nn	nn	nn	np	nn	nn	nn	nn	np	nn	np	nn	np	nn	np	nn	nn	nn	nn	nn	np	nn	nn	nn	np	nn	np	np	np	nn	np	np	nn	np	np	nn	nn	nn	nn	nn	np	nn
Marker61140	<nnxnp>	np	np	np	np	nn	nn	nn	nn	nn	np	nn	nn	nn	nn	np	nn	np	nn	np	nn	np	nn	nn	nn	nn	nn	np	nn	nn	nn	np	nn	np	np	np	nn	np	np	nn	np	np	nn	nn	nn	nn	nn	np	nn
Marker30375	<efxeg>	--	ee	--	ef	fg	--	--	eg	eg	ef	ee	fg	--	eg	ef	--	ee	eg	ee	fg	ee	fg	fg	fg	fg	--	ee	fg	fg	--	--	--	ee	--	ef	--	--	--	--	ee	ee	--	--	--	--	--	ee	--
Marker49874	<nnxnp>	np	np	np	np	nn	nn	nn	nn	nn	np	nn	nn	nn	nn	np	nn	np	nn	np	nn	np	nn	nn	nn	nn	nn	np	nn	nn	nn	np	nn	np	np	np	nn	np	np	nn	np	np	nn	nn	nn	nn	np	np	nn
Marker13153	<lmxll>	ll	lm	lm	ll	lm	ll	lm	ll	lm	ll	lm	ll	ll	ll	ll	ll	lm	lm	lm	lm	lm	ll	ll	ll	ll	lm	lm	ll	ll	lm	ll	ll	ll	ll	ll	lm	ll	lm	lm	ll	lm	lm	lm	ll	lm	lm	lm	ll
Marker25835	<nnxnp>	nn	nn	nn	nn	np	np	np	np	np	nn	np	np	np	np	nn	np	nn	np	nn	np	nn	np	np	np	np	np	nn	np	np	np	nn	np	nn	nn	nn	np	nn	nn	np	nn	nn	np	np	np	np	nn	np	np
Marker32651	<nnxnp>	nn	nn	nn	nn	np	np	np	np	np	nn	np	np	np	np	nn	np	nn	np	nn	np	nn	np	np	np	np	np	nn	np	np	np	nn	np	nn	nn	nn	np	nn	nn	np	nn	nn	np	np	np	np	nn	np	np
Marker35788	<nnxnp>	np	np	np	np	nn	nn	nn	nn	nn	np	nn	nn	nn	nn	np	nn	np	nn	np	nn	np	nn	nn	nn	nn	nn	np	nn	nn	nn	np	nn	np	np	np	nn	np	np	nn	np	np	nn	nn	nn	nn	np	nn	nn
Marker12744	<nnxnp>	nn	nn	nn	nn	np	np	np	np	np	nn	np	np	np	np	nn	np	nn	np	nn	np	nn	np	np	np	np	np	nn	np	np	np	nn	np	nn	nn	nn	np	nn	nn	np	nn	nn	np	np	np	np	nn	np	np
Marker8318	<efxeg>	--	eg	fg	fg	ef	ee	ee	ee	ef	fg	ee	ef	fg	ee	eg	ef	eg	ee	eg	ef	--	ef	ef	ee	ef	ee	eg	--	ef	ee	--	ef	eg	fg	fg	ee	fg	eg	ee	fg	--	ee	--	--	--	eg	eg	ee
Marker16893	<nnxnp>	np	np	np	np	nn	nn	nn	nn	nn	np	nn	nn	np	nn	np	nn	np	nn	np	nn	np	nn	nn	nn	nn	nn	np	nn	nn	nn	np	nn	np	np	np	nn	np	np	nn	np	np	nn	nn	nn	nn	np	np	nn
Marker16168	<nnxnp>	np	np	np	np	nn	nn	nn	nn	nn	np	nn	nn	np	nn	np	nn	np	nn	np	nn	np	nn	nn	nn	nn	nn	np	nn	nn	nn	np	nn	np	np	np	nn	np	np	nn	np	nn	nn	nn	nn	nn	np	np	nn
Marker28273	<nnxnp>	np	np	np	np	nn	nn	nn	nn	nn	np	nn	nn	np	nn	np	nn	np	nn	np	nn	np	nn	nn	nn	nn	nn	np	nn	nn	nn	np	nn	np	np	np	nn	np	np	nn	np	np	nn	nn	nn	nn	np	np	nn
Marker23397	<lmxll>	lm	ll	lm	ll	ll	lm	ll	lm	ll	ll	ll	ll	lm	ll	ll	ll	lm	ll	lm	ll	ll	ll	ll	ll	ll	ll	lm	lm	ll	ll	lm	ll	ll	ll	lm	ll	ll	lm	ll	lm	ll	ll	ll	lm	ll	lm	ll	ll
Marker31425	<nnxnp>	np	np	np	np	nn	nn	nn	nn	nn	np	nn	nn	np	nn	np	nn	np	nn	np	nn	np	nn	np	nn	nn	nn	np	nn	nn	nn	np	nn	np	np	np	nn	np	np	nn	np	np	nn	nn	nn	nn	np	np	nn
Marker44444	<abxcd>	bc	ac	bc	bc	bd	ad	ad	ad	--	bc	ad	--	bc	ad	bc	--	ac	ad	ac	bd	bc	bd	bd	ad	bd	ad	ac	--	bd	ad	bd	bd	ac	bc	bc	ad	bc	ac	ad	bc	ac	ad	--	bd	ad	ac	ac	ad
Marker35843	<nnxnp>	np	np	np	np	nn	np	nn	nn	nn	np	nn	nn	np	nn	np	nn	np	nn	np	nn	np	nn	nn	nn	nn	nn	np	nn	nn	nn	nn	nn	np	np	np	nn	np	np	nn	np	np	nn	np	nn	nn	np	np	nn
Marker31296	<nnxnp>	np	np	np	np	nn	np	nn	nn	nn	np	nn	nn	np	nn	np	nn	np	nn	np	nn	np	nn	nn	nn	nn	nn	np	nn	nn	nn	nn	nn	np	np	np	nn	np	np	nn	np	np	nn	np	nn	nn	np	np	nn
Marker2580	<nnxnp>	np	np	np	np	nn	nn	nn	nn	nn	np	nn	nn	np	nn	np	nn	np	nn	np	nn	np	nn	np	nn	nn	nn	np	nn	nn	nn	np	nn	np	np	np	nn	np	np	nn	np	np	nn	nn	nn	nn	np	nn	nn
Marker25744	<nnxnp>	nn	nn	nn	nn	np	nn	np	np	np	nn	np	np	nn	np	nn	np	nn	np	nn	np	nn	nn	np	np	nn	np	nn	np	np	np	np	np	nn	nn	nn	np	nn	nn	np	nn	nn	np	np	np	np	nn	np	np
Marker39126	<nnxnp>	np	np	np	np	nn	np	nn	nn	nn	np	nn	nn	np	nn	np	nn	np	nn	np	nn	np	nn	nn	nn	np	nn	np	nn	nn	nn	nn	nn	np	np	np	nn	np	np	nn	np	np	nn	nn	nn	nn	np	nn	nn
Marker31400	<nnxnp>	nn	nn	nn	nn	np	np	np	np	np	nn	np	np	nn	np	nn	np	nn	np	nn	np	nn	np	np	np	np	np	nn	np	np	np	nn	np	nn	nn	nn	np	nn	nn	np	nn	nn	np	np	nn	np	nn	np	np
Marker7206	<nnxnp>	np	np	np	np	nn	nn	nn	nn	nn	np	nn	nn	np	nn	np	nn	np	nn	np	nn	np	nn	nn	nn	nn	nn	np	nn	nn	nn	np	nn	np	np	np	nn	np	np	nn	np	nn	nn	nn	nn	nn	np	np	nn
Marker31303	<lmxll>	ll	lm	ll	ll	ll	lm	lm	lm	ll	ll	lm	ll	ll	lm	ll	ll	lm	lm	lm	ll	ll	ll	ll	ll	ll	lm	lm	ll	ll	lm	ll	ll	lm	ll	ll	lm	ll	lm	lm	ll	lm	lm	ll	ll	lm	lm	lm	lm
Marker33777	<nnxnp>	nn	nn	nn	nn	np	nn	np	np	np	nn	np	np	nn	np	nn	np	nn	np	nn	np	nn	nn	np	np	nn	np	nn	np	np	np	np	np	nn	nn	nn	np	nn	nn	np	nn	nn	np	nn	np	np	nn	np	np
Marker30380	<abxcd>	ad	bd	ad	--	ac	bc	bc	bc	--	ad	bc	ac	ad	--	ad	ad	bd	bc	bd	ac	ad	ac	ac	--	ac	bc	bd	ac	ac	bc	ad	ac	bc	--	--	--	--	bd	--	ac	bd	--	--	--	--	bd	bd	--
Marker25138	<nnxnp>	nn	nn	nn	nn	np	np	np	np	np	np	np	np	nn	np	nn	np	nn	np	nn	np	nn	np	np	np	np	np	nn	np	np	np	nn	np	nn	nn	nn	np	nn	nn	np	nn	nn	np	np	nn	np	nn	nn	np
Marker48257	<nnxnp>	nn	nn	nn	nn	np	np	np	np	np	np	np	np	nn	np	nn	np	nn	np	nn	np	nn	np	np	np	np	np	nn	np	np	np	nn	np	nn	nn	np	np	nn	nn	np	nn	nn	np	np	nn	np	nn	nn	np
Marker2591	<nnxnp>	nn	nn	nn	nn	np	np	np	np	np	np	np	np	nn	np	nn	np	nn	np	nn	np	nn	np	np	np	np	np	nn	np	np	np	nn	np	nn	nn	np	np	nn	nn	np	nn	nn	np	np	nn	np	nn	nn	np
Marker56360	<nnxnp>	np	np	np	np	nn	nn	nn	nn	nn	nn	nn	nn	np	nn	np	nn	np	nn	np	nn	np	nn	nn	nn	nn	nn	np	nn	nn	nn	np	nn	np	np	nn	nn	np	np	nn	np	np	nn	nn	np	nn	np	np	nn
Marker32334	<nnxnp>	np	np	np	np	nn	nn	nn	nn	nn	nn	nn	nn	np	nn	np	nn	np	nn	np	nn	np	nn	nn	nn	nn	nn	np	nn	nn	nn	np	nn	np	np	np	nn	np	np	nn	np	np	nn	nn	np	nn	np	np	nn
Marker22095	<nnxnp>	nn	nn	nn	nn	np	np	np	np	np	np	np	np	nn	np	nn	np	nn	np	nn	np	nn	np	np	np	np	np	nn	np	np	np	nn	np	nn	nn	nn	np	nn	nn	np	nn	nn	np	np	nn	np	nn	nn	np
Marker10306	<lmxll>	lm	ll	lm	lm	lm	ll	ll	ll	ll	lm	ll	lm	lm	ll	lm	lm	ll	ll	ll	lm	lm	lm	lm	lm	lm	ll	ll	lm	lm	ll	lm	lm	ll	lm	lm	ll	lm	ll	ll	lm	ll	ll	lm	lm	ll	ll	ll	ll
Marker36134	<nnxnp>	np	np	np	np	nn	nn	nn	nn	nn	nn	nn	nn	np	nn	np	nn	np	nn	np	nn	np	nn	nn	nn	nn	nn	np	nn	nn	nn	np	nn	np	np	np	nn	np	np	nn	np	np	nn	nn	np	nn	np	np	nn
Marker41858	<abxcd>	ad	ad	ad	bd	bc	ac	ac	--	bc	ac	bc	--	bd	ac	ad	--	ad	bc	bd	bc	--	bc	bc	--	ac	bc	bd	bc	ac	ac	--	ac	ad	ad	ad	ac	ad	--	--	bd	ad	--	bc	--	--	bd	ad	--
Marker39479	<lmxll>	ll	lm	ll	ll	ll	lm	lm	lm	lm	ll	lm	ll	ll	lm	ll	ll	lm	lm	lm	ll	ll	ll	ll	ll	ll	lm	lm	ll	ll	lm	ll	ll	lm	ll	ll	lm	ll	lm	lm	ll	lm	lm	ll	ll	lm	lm	lm	lm
Marker30387	<lmxll>	lm	ll	lm	lm	lm	ll	ll	ll	ll	lm	ll	lm	lm	ll	lm	lm	ll	ll	ll	lm	lm	lm	lm	lm	lm	ll	ll	lm	lm	ll	lm	lm	ll	lm	lm	ll	lm	ll	ll	lm	ll	ll	lm	lm	ll	ll	ll	ll
Marker11414	<nnxnp>	nn	nn	nn	nn	np	np	np	np	np	np	np	np	nn	np	nn	nn	nn	np	nn	np	nn	np	np	np	np	np	nn	np	np	np	nn	np	nn	nn	nn	np	nn	nn	np	nn	nn	np	np	nn	nn	np	nn	np
Marker8227	<nnxnp>	nn	nn	nn	nn	np	np	np	nn	np	np	np	np	nn	np	nn	np	nn	np	nn	np	nn	np	np	np	np	np	nn	np	np	np	nn	np	nn	nn	nn	np	nn	nn	np	nn	nn	nn	np	nn	np	nn	nn	np
Marker8232	<nnxnp>	nn	nn	nn	nn	np	np	np	nn	np	np	np	np	nn	np	nn	np	nn	np	nn	np	nn	np	np	np	np	np	nn	np	np	np	nn	np	nn	nn	nn	np	nn	nn	np	nn	nn	nn	np	nn	np	nn	nn	np
Marker23437	<lmxll>	lm	ll	lm	lm	lm	ll	ll	ll	ll	lm	ll	lm	lm	ll	lm	lm	ll	ll	ll	lm	lm	lm	lm	lm	lm	lm	ll	lm	ll	ll	lm	lm	ll	ll	lm	ll	lm	lm	ll	lm	ll	ll	lm	lm	ll	ll	ll	ll
Marker3745	<efxeg>	ef	--	ef	ef	--	eg	--	--	eg	ef	eg	eg	--	fg	ef	ee	ef	--	--	--	ef	--	eg	--	eg	--	ef	eg	fg	--	--	eg	ef	--	ef	--	--	ef	ef	ef	--	--	--	--	--	--	--	--
Marker8509	<nnxnp>	np	np	np	np	nn	nn	nn	np	nn	np	nn	nn	np	nn	np	nn	np	nn	nn	nn	np	nn	nn	nn	nn	nn	np	nn	nn	nn	np	nn	np	np	np	nn	np	np	nn	np	nn	np	nn	np	nn	np	np	nn
Marker29104	<lmxll>	ll	lm	ll	ll	ll	lm	lm	lm	lm	lm	ll	lm	ll	lm	ll	ll	lm	lm	lm	ll	ll	ll	ll	ll	ll	ll	lm	ll	lm	lm	ll	lm	lm	lm	ll	lm	ll	lm	lm	ll	lm	lm	ll	ll	lm	lm	lm	lm
Marker6108	<nnxnp>	nn	nn	nn	nn	np	np	np	nn	np	nn	np	np	nn	np	nn	np	nn	np	np	np	nn	np	np	np	np	np	nn	np	np	np	nn	np	nn	nn	nn	np	nn	nn	nn	nn	np	nn	np	nn	np	nn	nn	np
Marker26997	<lmxll>	lm	ll	ll	lm	lm	ll	ll	ll	ll	ll	lm	ll	lm	ll	lm	ll	ll	ll	ll	lm	ll	lm	lm	ll	lm	lm	ll	lm	ll	ll	lm	ll	ll	ll	lm	ll	lm	ll	ll	lm	ll	ll	lm	lm	ll	ll	ll	ll
Marker35200	<efxeg>	ee	ef	ee	ee	eg	--	fg	--	fg	fg	eg	fg	ee	fg	ee	--	ef	eg	ef	eg	ee	eg	eg	--	fg	eg	ef	eg	fg	fg	--	ee	ef	--	eg	--	ee	ee	--	--	ee	--	eg	ee	--	--	ef	--
Marker31009	<nnxnp>	nn	nn	nn	nn	np	np	np	nn	np	np	np	np	nn	np	nn	np	nn	np	nn	np	nn	np	np	np	np	np	nn	np	np	np	nn	np	nn	nn	nn	np	nn	nn	np	nn	np	nn	np	nn	np	nn	nn	np
Marker33425	<lmxll>	ll	lm	ll	ll	ll	lm	lm	lm	lm	lm	ll	lm	ll	lm	ll	ll	lm	lm	lm	ll	ll	ll	ll	ll	ll	ll	lm	ll	lm	lm	ll	ll	lm	lm	ll	lm	ll	ll	lm	ll	lm	lm	ll	ll	lm	lm	lm	lm
Marker35682	<nnxnp>	nn	nn	nn	nn	np	np	np	nn	np	np	np	np	nn	np	nn	np	nn	np	nn	np	nn	np	np	np	np	np	nn	np	np	np	nn	np	nn	nn	nn	np	nn	nn	np	nn	np	nn	np	nn	np	nn	nn	np
Marker41779	<lmxll>	ll	ll	ll	ll	lm	ll	ll	ll	ll	ll	lm	ll	lm	ll	ll	ll	lm	lm	lm	lm	ll	lm	lm	ll	ll	lm	lm	lm	ll	ll	lm	ll	ll	ll	lm	ll	ll	ll	ll	lm	ll	ll	lm	lm	ll	ll	ll	ll
Marker22098	<efxeg>	ee	--	ee	--	eg	--	--	eg	--	--	eg	--	ee	--	--	ee	ee	eg	ee	eg	--	eg	eg	--	--	eg	ee	eg	--	--	--	--	ee	ee	ee	--	--	ee	--	ee	ee	eg	eg	ee	--	ee	--	ee
Marker6868	<lmxll>	ll	ll	ll	ll	lm	lm	ll	ll	ll	ll	lm	ll	lm	ll	ll	ll	lm	lm	lm	lm	ll	lm	lm	ll	ll	lm	lm	lm	ll	ll	lm	ll	ll	ll	lm	ll	ll	ll	ll	lm	ll	ll	lm	lm	ll	ll	ll	ll
Marker8241	<nnxnp>	nn	nn	nn	nn	np	np	np	nn	np	np	np	np	nn	np	nn	np	nn	np	nn	np	nn	np	np	np	np	np	nn	np	np	np	nn	np	nn	nn	nn	np	nn	nn	np	nn	np	nn	np	nn	np	nn	nn	np
Marker30815	<efxeg>	ee	ee	ee	ee	eg	eg	--	ee	eg	eg	eg	eg	ee	eg	ee	--	ee	eg	ee	eg	ee	eg	--	--	eg	ee	ee	eg	eg	eg	--	--	ee	--	ee	eg	ee	ee	--	ee	eg	ee	eg	--	ee	ee	ee	eg
Marker16655	<nnxnp>	np	np	np	np	nn	nn	nn	np	nn	nn	nn	nn	np	nn	np	nn	np	nn	np	nn	np	nn	nn	nn	nn	nn	np	nn	nn	nn	np	nn	np	np	np	nn	np	np	nn	np	nn	np	nn	np	np	np	np	nn
Marker36147	<nnxnp>	np	np	np	np	nn	nn	nn	np	nn	nn	nn	nn	np	nn	np	nn	np	nn	np	nn	np	nn	nn	nn	nn	nn	np	nn	nn	nn	np	nn	np	np	np	nn	np	np	nn	np	nn	np	nn	np	np	np	np	nn
Marker128	<nnxnp>	nn	nn	nn	nn	np	np	np	nn	np	np	np	np	nn	np	nn	np	nn	np	nn	np	nn	np	np	np	np	np	nn	np	np	np	nn	np	nn	nn	nn	np	nn	nn	np	nn	np	nn	np	nn	nn	nn	nn	np
Marker16656	<nnxnp>	np	np	np	np	nn	nn	nn	np	nn	nn	nn	nn	np	nn	np	nn	np	nn	np	nn	np	nn	nn	nn	nn	nn	np	nn	nn	nn	np	nn	np	np	np	nn	np	np	nn	np	nn	np	nn	np	np	np	np	nn
Marker28383	<nnxnp>	np	np	np	np	nn	nn	nn	np	nn	nn	nn	nn	np	nn	np	nn	np	nn	np	nn	np	nn	nn	nn	nn	nn	np	nn	nn	nn	np	nn	np	np	np	nn	np	np	nn	np	nn	np	nn	np	np	np	np	np
Marker15856	<nnxnp>	nn	nn	nn	nn	np	np	np	nn	nn	np	np	np	nn	np	nn	np	nn	np	nn	np	nn	np	np	np	np	np	nn	np	np	np	nn	np	nn	nn	nn	np	nn	nn	np	nn	np	nn	np	np	np	nn	np	nn
Marker30273	<nnxnp>	np	np	np	np	nn	nn	nn	np	np	nn	nn	nn	np	nn	np	nn	np	nn	np	nn	np	nn	nn	nn	nn	nn	np	nn	nn	nn	np	nn	np	np	np	nn	np	np	nn	np	nn	np	nn	nn	nn	np	nn	np
Marker2782	<nnxnp>	np	np	np	np	nn	nn	nn	np	np	nn	nn	nn	np	nn	np	nn	np	nn	np	nn	np	nn	nn	nn	nn	nn	np	nn	nn	nn	np	nn	np	np	np	nn	np	np	nn	np	nn	np	nn	nn	nn	np	nn	np
Marker13726	<abxcd>	--	ad	bd	bd	bc	ac	ac	--	ac	--	bc	ad	--	ac	ad	bc	ac	bc	bd	bc	ad	bc	bd	--	ac	--	bd	--	ad	ac	--	ac	ad	--	bd	--	--	--	--	--	--	ad	--	--	--	--	ac	--
Marker3242	<efxeg>	eg	fg	eg	--	ee	ee	ef	eg	ef	ef	ee	ef	eg	ef	fg	ee	eg	ee	eg	ee	fg	ee	ee	--	ef	ee	eg	ee	ef	ef	eg	ef	fg	--	eg	ee	--	--	ef	eg	--	--	ee	--	--	--	fg	ee
Marker31073	<nnxnp>	np	np	np	np	nn	nn	nn	np	np	nn	nn	nn	np	nn	np	nn	np	nn	np	nn	np	nn	nn	nn	nn	nn	np	nn	nn	np	np	nn	np	np	np	nn	np	np	nn	nn	nn	np	nn	nn	nn	np	nn	np
Marker46011	<nnxnp>	np	np	np	np	nn	nn	nn	np	np	nn	nn	nn	np	nn	np	nn	np	nn	np	nn	np	nn	nn	nn	nn	nn	np	nn	nn	np	np	nn	np	np	np	nn	np	np	nn	nn	nn	np	nn	nn	nn	np	nn	np
Marker21751	<abxcd>	ac	bc	ac	bc	ad	--	bd	--	--	bd	ad	bd	ac	ad	--	ac	ac	ad	ac	bd	bc	ad	ad	--	bd	ad	ac	ad	--	ac	ac	bd	bc	ac	ac	--	bd	ad	bd	ad	--	--	--	--	--	--	--	bc
Marker62692	<nnxnp>	nn	nn	nn	nn	np	np	np	nn	nn	np	np	np	nn	np	nn	np	nn	np	nn	np	nn	np	np	np	np	np	nn	np	np	nn	nn	np	nn	nn	nn	np	nn	nn	np	np	np	nn	np	np	np	nn	nn	nn
Marker21733	<lmxll>	ll	lm	ll	lm	ll	ll	lm	ll	lm	lm	ll	lm	ll	lm	lm	ll	ll	ll	ll	ll	lm	ll	ll	ll	lm	ll	ll	ll	lm	lm	ll	lm	lm	lm	ll	ll	lm	ll	lm	ll	lm	ll	ll	ll	lm	ll	lm	ll
Marker29174	<lmxll>	ll	lm	ll	lm	ll	ll	lm	ll	lm	lm	ll	lm	ll	lm	lm	ll	ll	ll	ll	ll	lm	ll	ll	ll	lm	ll	ll	ll	lm	lm	ll	lm	lm	lm	ll	ll	lm	ll	lm	ll	lm	ll	ll	ll	lm	ll	lm	ll
Marker24926	<lmxll>	ll	lm	ll	lm	ll	ll	lm	ll	lm	lm	ll	lm	ll	lm	lm	ll	ll	ll	ll	ll	lm	ll	ll	lm	lm	ll	ll	ll	lm	lm	ll	lm	lm	lm	ll	ll	lm	ll	ll	ll	lm	ll	ll	ll	lm	ll	ll	ll
Marker26240	<lmxll>	ll	lm	ll	lm	ll	ll	lm	ll	lm	lm	ll	lm	ll	lm	lm	ll	ll	ll	ll	ll	lm	ll	ll	lm	lm	ll	ll	ll	lm	lm	ll	lm	lm	lm	ll	ll	lm	ll	ll	ll	lm	ll	ll	ll	lm	ll	ll	ll
Marker29494	<efxeg>	--	--	fg	eg	ef	--	ee	fg	ef	ee	ef	ee	--	ee	--	--	--	ef	--	ef	--	ef	ef	--	ee	ef	fg	ef	ee	ee	--	--	eg	--	--	--	--	--	--	fg	ee	--	--	--	--	--	ee	--
Marker17569	<nnxnp>	nn	nn	nn	nn	np	np	np	nn	nn	np	np	np	nn	np	nn	np	nn	np	nn	np	nn	np	np	np	np	np	nn	np	np	nn	nn	np	nn	nn	nn	np	nn	nn	np	np	np	nn	np	np	np	nn	nn	nn
Marker26123	<lmxll>	lm	ll	lm	ll	lm	lm	ll	lm	ll	ll	lm	ll	lm	ll	ll	lm	lm	lm	lm	lm	ll	lm	lm	ll	ll	lm	lm	lm	ll	ll	lm	ll	ll	ll	lm	lm	ll	lm	ll	lm	ll	lm	lm	lm	ll	lm	ll	lm
Marker35380	<lmxll>	lm	ll	lm	ll	lm	lm	ll	lm	ll	ll	lm	ll	lm	ll	ll	lm	lm	lm	lm	lm	ll	lm	lm	ll	ll	lm	lm	lm	ll	ll	lm	ll	ll	ll	lm	lm	ll	lm	ll	lm	ll	lm	lm	lm	ll	lm	ll	lm
Marker36283	<abxcd>	ac	bc	ac	bc	ad	--	bd	--	--	bd	ad	bd	ac	bd	bc	--	ac	ad	ac	ad	bc	ad	ad	ad	bd	ad	ac	ad	bd	bc	--	--	bc	--	ac	--	bc	--	--	ad	ad	ac	ad	--	--	ac	bc	ac
Marker33946	<nnxnp>	nn	nn	nn	nn	np	np	np	nn	nn	np	np	np	nn	np	nn	np	nn	np	nn	np	nn	np	np	np	np	np	nn	np	np	nn	nn	np	nn	nn	nn	np	nn	nn	np	np	np	nn	np	nn	np	nn	nn	nn
Marker45545	<nnxnp>	np	np	np	np	nn	nn	nn	np	np	nn	nn	nn	np	nn	np	nn	np	nn	np	nn	np	nn	nn	nn	nn	nn	np	nn	nn	np	np	nn	np	np	np	nn	np	np	nn	nn	nn	np	nn	np	nn	np	np	np
Marker13004	<efxeg>	ee	ef	ee	ef	eg	eg	fg	ee	ef	--	eg	--	ee	--	ef	--	ee	eg	ee	eg	ef	eg	eg	fg	fg	eg	ee	eg	fg	ef	ee	fg	ef	ef	eg	eg	ef	ee	--	eg	fg	ee	eg	ee	--	ee	ee	ef
Marker41519	<lmxll>	ll	lm	ll	lm	ll	ll	lm	ll	lm	lm	ll	lm	ll	lm	lm	ll	ll	ll	ll	ll	lm	ll	ll	lm	lm	ll	ll	ll	lm	ll	ll	lm	lm	lm	ll	ll	lm	ll	lm	ll	lm	ll	ll	ll	ll	ll	lm	lm
Marker2280	<nnxnp>	nn	nn	nn	nn	np	np	np	nn	np	np	np	np	nn	np	nn	np	nn	np	nn	np	nn	np	np	np	np	np	nn	np	np	nn	nn	np	nn	nn	nn	np	nn	nn	np	nn	np	nn	np	nn	nn	nn	nn	nn
Marker31016	<lmxll>	ll	lm	ll	lm	ll	ll	lm	ll	lm	lm	ll	lm	ll	lm	lm	ll	ll	ll	ll	ll	lm	ll	ll	lm	lm	ll	ll	ll	lm	ll	ll	lm	lm	lm	ll	ll	lm	ll	lm	ll	lm	ll	ll	ll	ll	ll	lm	lm
Marker4519	<lmxll>	ll	lm	ll	lm	ll	ll	lm	ll	lm	lm	ll	lm	ll	lm	lm	ll	ll	ll	ll	ll	lm	ll	ll	lm	lm	ll	ll	ll	lm	lm	ll	lm	lm	lm	ll	ll	lm	ll	lm	ll	lm	ll	ll	ll	lm	ll	lm	lm
Marker32829	<lmxll>	ll	lm	ll	lm	ll	ll	lm	ll	lm	lm	ll	lm	ll	lm	lm	ll	ll	ll	ll	ll	lm	ll	ll	lm	lm	ll	ll	ll	lm	lm	ll	lm	lm	lm	ll	ll	lm	ll	lm	ll	lm	ll	ll	ll	ll	ll	lm	lm
Marker30817	<lmxll>	ll	lm	ll	lm	ll	ll	lm	ll	lm	lm	ll	lm	ll	lm	lm	ll	ll	ll	ll	ll	lm	ll	ll	lm	lm	ll	ll	ll	lm	lm	ll	lm	lm	lm	ll	ll	lm	ll	lm	ll	lm	ll	ll	ll	lm	ll	lm	lm
Marker30469	<abxcd>	bc	ac	bc	ac	bd	bc	ad	bc	ac	ad	bd	--	bc	ad	ac	bd	bc	--	bc	--	ac	bd	--	ad	ad	bd	--	bd	ad	ac	--	ad	ac	ac	bc	bd	ac	bc	ac	bd	ad	bc	bd	bc	ad	bc	ac	ad
Marker34034	<lmxll>	ll	lm	ll	lm	ll	ll	lm	ll	lm	lm	ll	lm	ll	lm	lm	ll	ll	ll	ll	ll	lm	ll	ll	lm	lm	ll	ll	ll	lm	lm	ll	lm	lm	lm	ll	ll	lm	ll	lm	ll	ll	ll	ll	ll	lm	ll	lm	lm
Marker29887	<lmxll>	lm	ll	lm	ll	lm	lm	ll	lm	ll	ll	lm	ll	lm	ll	ll	lm	lm	lm	lm	lm	ll	lm	lm	ll	ll	lm	lm	lm	ll	ll	lm	ll	ll	ll	lm	lm	ll	lm	ll	lm	ll	lm	lm	lm	ll	lm	ll	ll
Marker25114	<lmxll>	ll	lm	ll	lm	ll	ll	lm	ll	lm	lm	ll	lm	ll	lm	lm	ll	ll	ll	ll	ll	lm	ll	ll	lm	lm	ll	ll	ll	lm	lm	ll	lm	lm	lm	ll	ll	lm	ll	lm	ll	lm	ll	ll	ll	ll	ll	lm	lm
Marker36298	<lmxll>	ll	lm	ll	lm	ll	ll	lm	ll	lm	lm	ll	lm	ll	lm	lm	ll	ll	ll	ll	ll	lm	ll	ll	lm	lm	ll	ll	ll	lm	lm	ll	lm	lm	lm	ll	ll	lm	ll	lm	ll	lm	ll	ll	ll	ll	ll	lm	lm
Marker14661	<lmxll>	ll	lm	ll	lm	ll	ll	lm	ll	lm	lm	ll	lm	ll	lm	lm	ll	ll	ll	ll	ll	lm	ll	ll	lm	lm	ll	ll	ll	lm	lm	ll	lm	lm	lm	ll	ll	lm	ll	lm	ll	ll	ll	ll	ll	lm	ll	lm	lm
Marker59095	<nnxnp>	nn	nn	nn	nn	np	np	np	nn	np	np	np	np	nn	np	nn	np	nn	np	nn	np	nn	np	np	np	np	np	nn	np	np	nn	nn	np	nn	nn	nn	np	nn	nn	np	np	np	nn	np	nn	np	nn	nn	nn
Marker29779	<lmxll>	lm	ll	lm	ll	lm	lm	ll	lm	ll	ll	lm	ll	lm	ll	ll	lm	lm	lm	lm	lm	ll	lm	lm	ll	ll	lm	lm	lm	ll	ll	lm	ll	ll	ll	lm	lm	ll	lm	ll	lm	ll	lm	lm	lm	ll	lm	ll	ll
Marker38530	<lmxll>	lm	ll	lm	ll	lm	lm	ll	lm	ll	ll	lm	ll	lm	ll	ll	lm	lm	lm	lm	lm	ll	lm	lm	ll	ll	lm	lm	lm	ll	ll	lm	ll	ll	ll	lm	lm	ll	lm	ll	lm	ll	lm	lm	lm	ll	lm	lm	ll
Marker24927	<lmxll>	ll	lm	ll	lm	ll	ll	lm	ll	ll	lm	ll	lm	ll	lm	lm	ll	ll	ll	ll	ll	lm	ll	ll	lm	lm	ll	ll	ll	lm	lm	ll	lm	lm	lm	ll	ll	lm	ll	lm	ll	lm	ll	ll	ll	lm	ll	ll	lm
Marker36128	<lmxll>	ll	lm	ll	lm	ll	ll	lm	ll	ll	lm	ll	lm	ll	lm	lm	ll	ll	ll	ll	ll	lm	ll	ll	lm	lm	ll	ll	ll	lm	lm	ll	lm	lm	lm	ll	ll	lm	ll	lm	ll	lm	ll	ll	ll	lm	ll	ll	lm
Marker30816	<abxcd>	ad	bc	--	--	--	--	bd	--	--	--	ad	bd	ad	--	bc	--	ac	ad	ac	ad	bd	--	--	bd	bd	ad	ac	--	bd	bd	--	--	bc	--	--	--	bd	--	--	--	--	--	--	--	--	--	bd	--
Marker25107	<lmxll>	ll	lm	ll	lm	ll	ll	lm	ll	lm	lm	ll	lm	ll	lm	lm	ll	ll	ll	ll	ll	lm	ll	ll	lm	lm	ll	ll	ll	lm	lm	ll	lm	lm	lm	ll	ll	lm	ll	lm	ll	lm	ll	ll	ll	lm	ll	lm	lm
Marker36149	<lmxll>	lm	ll	lm	ll	lm	lm	ll	lm	ll	ll	lm	ll	lm	ll	ll	lm	lm	lm	lm	lm	ll	lm	lm	ll	ll	lm	lm	lm	ll	ll	lm	ll	ll	ll	lm	lm	ll	lm	ll	lm	ll	lm	lm	lm	ll	lm	ll	ll
Marker24904	<lmxll>	lm	ll	lm	ll	lm	lm	ll	lm	ll	ll	lm	ll	lm	ll	ll	lm	lm	lm	lm	lm	ll	lm	lm	ll	ll	lm	lm	lm	ll	ll	lm	ll	ll	ll	lm	lm	ll	lm	ll	lm	ll	lm	lm	lm	ll	lm	ll	ll
Marker32805	<nnxnp>	nn	nn	nn	nn	np	np	np	nn	nn	np	np	np	nn	np	nn	np	nn	np	nn	np	nn	np	np	np	np	np	nn	np	np	nn	nn	np	nn	nn	nn	np	nn	nn	np	np	np	nn	np	np	np	np	nn	nn
Marker29182	<lmxll>	lm	ll	lm	ll	lm	lm	ll	lm	lm	ll	lm	ll	lm	ll	ll	lm	lm	lm	lm	lm	ll	lm	lm	ll	ll	lm	lm	lm	ll	ll	lm	ll	ll	ll	lm	lm	ll	lm	ll	lm	ll	lm	lm	lm	ll	lm	ll	ll
Marker10052	<lmxll>	lm	ll	lm	ll	lm	lm	ll	lm	lm	ll	lm	ll	lm	ll	ll	lm	lm	lm	lm	lm	ll	lm	lm	ll	ll	lm	lm	lm	ll	ll	lm	ll	ll	ll	lm	lm	ll	lm	ll	lm	ll	lm	lm	lm	ll	lm	ll	ll
Marker33343	<abxcd>	--	bd	--	bd	ac	--	bd	--	--	bc	--	bc	--	bc	bd	--	--	ac	--	--	bd	ac	ac	bc	bc	ac	--	ac	bc	--	--	bc	bd	--	--	--	bd	--	--	--	--	--	ac	--	--	--	--	bd
Marker8335	<abxcd>	bc	ac	bc	ac	bd	bc	ac	--	--	ad	bc	ad	bc	ad	ac	--	bc	bd	bc	bc	--	bd	bd	ad	ad	bd	bc	bd	ad	ac	--	ad	ac	--	bd	bd	--	--	--	bd	--	--	bd	--	--	bd	--	--
Marker9811	<lmxll>	lm	ll	lm	ll	lm	lm	ll	lm	lm	ll	lm	ll	lm	ll	ll	lm	lm	lm	lm	lm	ll	lm	lm	ll	ll	lm	lm	lm	ll	ll	lm	ll	ll	ll	lm	lm	ll	lm	ll	lm	ll	lm	lm	lm	ll	lm	ll	ll
Marker27543	<lmxll>	ll	lm	ll	lm	ll	lm	lm	lm	lm	ll	lm	lm	ll	lm	ll	lm	lm	lm	lm	lm	ll	lm	lm	ll	lm	lm	lm	ll	lm	lm	ll	lm	lm	lm	ll	lm	ll	lm	lm	ll	lm	lm	lm	ll	lm	lm	lm	lm
Marker34631	<nnxnp>	nn	nn	nn	nn	np	np	np	nn	nn	np	np	np	nn	np	nn	np	nn	np	nn	np	nn	np	np	np	np	np	nn	np	np	nn	nn	np	nn	nn	nn	np	nn	nn	np	np	np	nn	np	np	np	np	nn	nn
Marker3310	<lmxll>	lm	ll	lm	ll	lm	lm	ll	lm	lm	ll	lm	ll	lm	ll	ll	lm	lm	lm	lm	lm	ll	lm	lm	ll	ll	lm	lm	lm	ll	ll	ll	ll	ll	ll	lm	lm	ll	lm	ll	lm	ll	lm	lm	lm	ll	lm	ll	ll
Marker15900	<lmxll>	lm	ll	lm	ll	lm	lm	ll	lm	lm	ll	lm	ll	lm	ll	ll	lm	lm	lm	lm	lm	ll	lm	lm	ll	ll	lm	lm	lm	ll	ll	ll	ll	ll	ll	lm	lm	ll	lm	ll	lm	ll	lm	lm	lm	ll	lm	ll	ll
Marker31957	<nnxnp>	nn	nn	nn	nn	np	np	nn	nn	np	np	np	np	nn	np	nn	np	nn	np	nn	np	nn	np	np	np	np	np	nn	np	np	nn	nn	np	nn	nn	nn	np	nn	nn	np	np	np	nn	np	nn	np	nn	nn	nn
Marker30834	<lmxll>	lm	ll	lm	ll	lm	lm	ll	lm	lm	ll	lm	ll	lm	ll	ll	lm	lm	lm	lm	lm	ll	lm	lm	ll	ll	lm	lm	lm	ll	ll	ll	ll	ll	ll	lm	lm	ll	lm	ll	lm	ll	lm	lm	lm	ll	lm	ll	ll
Marker3226	<lmxll>	ll	lm	ll	lm	ll	ll	lm	ll	ll	lm	ll	lm	ll	lm	lm	ll	ll	ll	ll	ll	lm	ll	ll	lm	lm	ll	ll	ll	lm	lm	ll	lm	lm	lm	ll	ll	lm	ll	lm	ll	lm	ll	ll	ll	lm	ll	lm	lm
Marker29885	<lmxll>	ll	lm	ll	lm	ll	ll	lm	ll	ll	lm	ll	lm	ll	lm	lm	ll	ll	ll	ll	ll	lm	ll	ll	lm	lm	ll	ll	ll	lm	lm	lm	lm	lm	lm	lm	ll	lm	ll	lm	ll	lm	ll	ll	ll	lm	ll	lm	lm
Marker25117	<lmxll>	lm	ll	lm	ll	lm	lm	ll	lm	lm	ll	lm	ll	lm	ll	ll	lm	lm	lm	lm	lm	ll	lm	lm	ll	ll	lm	lm	lm	ll	ll	ll	ll	ll	ll	ll	lm	ll	lm	ll	lm	ll	lm	lm	lm	ll	lm	ll	ll
Marker23424	<lmxll>	lm	ll	lm	ll	lm	lm	ll	lm	lm	ll	lm	ll	lm	ll	ll	lm	lm	lm	lm	lm	ll	lm	lm	ll	ll	lm	lm	lm	ll	ll	lm	ll	ll	ll	lm	lm	ll	lm	ll	lm	ll	ll	lm	lm	ll	lm	ll	ll
Marker7580	<abxcd>	ad	bd	--	bd	ad	--	bd	--	--	--	ad	bd	ad	bd	bd	--	ad	ad	ad	ad	--	ad	ad	--	bd	ad	ad	--	bd	--	--	--	--	--	--	--	--	--	--	--	--	ad	ad	--	bd	--	--	--
Marker2788	<lmxll>	lm	ll	lm	lm	lm	lm	ll	lm	lm	ll	lm	ll	lm	ll	ll	lm	lm	lm	lm	lm	ll	lm	lm	ll	ll	lm	lm	lm	ll	ll	lm	ll	ll	ll	lm	lm	ll	lm	ll	lm	lm	lm	lm	lm	ll	lm	ll	ll
Marker32018	<lmxll>	ll	lm	ll	ll	ll	ll	lm	ll	ll	lm	ll	lm	ll	lm	lm	ll	ll	ll	ll	ll	lm	ll	ll	lm	lm	ll	ll	ll	lm	lm	ll	lm	lm	lm	ll	ll	lm	ll	lm	ll	ll	ll	ll	ll	lm	ll	lm	lm
Marker25679	<lmxll>	lm	lm	ll	lm	ll	lm	lm	lm	lm	ll	lm	lm	ll	lm	ll	lm	lm	lm	lm	lm	ll	lm	lm	ll	lm	lm	lm	lm	lm	lm	ll	lm	lm	lm	ll	lm	ll	lm	lm	ll	lm	lm	lm	ll	lm	lm	lm	lm
Marker21730	<nnxnp>	np	np	np	np	nn	np	nn	np	np	nn	nn	nn	np	nn	np	nn	np	nn	np	nn	np	nn	nn	nn	nn	nn	np	nn	nn	np	nn	nn	np	np	np	nn	np	np	np	nn	nn	np	nn	np	nn	np	np	np
Marker4114	<lmxll>	lm	ll	lm	ll	lm	lm	ll	lm	lm	ll	lm	ll	lm	ll	ll	lm	lm	lm	lm	lm	ll	lm	lm	ll	ll	lm	lm	lm	ll	ll	lm	ll	ll	ll	lm	ll	ll	lm	ll	lm	ll	ll	lm	lm	ll	lm	ll	ll
Marker36288	<lmxll>	lm	ll	lm	ll	lm	lm	ll	lm	ll	ll	lm	ll	lm	ll	ll	lm	lm	lm	lm	lm	ll	lm	lm	ll	ll	lm	lm	lm	ll	ll	lm	ll	ll	ll	lm	ll	ll	lm	ll	lm	ll	ll	lm	lm	ll	ll	ll	ll
Marker56623	<nnxnp>	np	np	np	np	nn	nn	nn	np	np	nn	nn	nn	np	nn	np	nn	np	nn	np	nn	np	nn	nn	nn	nn	nn	np	nn	nn	np	np	nn	np	np	np	nn	np	np	nn	nn	nn	np	nn	nn	nn	nn	np	np
Marker29197	<lmxll>	ll	lm	ll	lm	ll	ll	lm	ll	lm	lm	ll	lm	ll	lm	lm	lm	ll	ll	ll	ll	lm	ll	ll	lm	lm	ll	ll	ll	lm	lm	lm	lm	lm	lm	lm	ll	lm	ll	lm	ll	lm	ll	ll	ll	lm	lm	lm	lm
Marker8772	<lmxll>	lm	ll	lm	ll	lm	ll	ll	lm	ll	ll	lm	ll	lm	ll	ll	ll	lm	lm	lm	lm	ll	lm	lm	ll	ll	lm	lm	lm	ll	ll	lm	ll	ll	ll	ll	lm	ll	lm	ll	lm	ll	ll	lm	lm	ll	lm	ll	ll
Marker33357	<nnxnp>	nn	nn	nn	nn	np	nn	nn	nn	nn	np	nn	np	nn	np	nn	np	nn	np	nn	nn	nn	np	np	np	np	np	nn	np	np	nn	np	np	nn	nn	nn	np	nn	nn	np	np	np	nn	np	nn	np	nn	nn	nn
Marker33947	<lmxll>	ll	lm	ll	lm	ll	lm	lm	ll	lm	lm	ll	lm	ll	lm	lm	lm	ll	ll	ll	ll	lm	ll	ll	lm	lm	ll	ll	ll	lm	lm	ll	lm	lm	lm	ll	ll	lm	ll	lm	ll	lm	lm	ll	ll	lm	ll	lm	lm
Marker34673	<lmxll>	lm	ll	lm	ll	lm	ll	ll	lm	lm	ll	lm	ll	lm	ll	ll	ll	lm	lm	lm	lm	ll	lm	lm	ll	ll	lm	lm	lm	ll	ll	lm	ll	ll	ll	ll	lm	ll	lm	ll	lm	ll	ll	lm	lm	ll	lm	ll	ll
Marker57888	<nnxnp>	np	np	np	np	nn	np	np	np	np	nn	np	nn	np	nn	np	nn	np	nn	np	np	np	nn	nn	nn	nn	nn	np	nn	nn	np	nn	nn	np	np	np	nn	np	np	nn	nn	nn	np	nn	np	nn	np	np	np
Marker21844	<lmxll>	ll	lm	ll	ll	ll	ll	lm	ll	ll	lm	ll	lm	ll	lm	lm	ll	lm	ll	ll	ll	lm	ll	ll	lm	lm	ll	ll	ll	lm	lm	ll	lm	lm	lm	ll	ll	lm	ll	lm	ll	ll	lm	ll	ll	ll	ll	lm	lm
Marker13767	<lmxll>	lm	ll	lm	lm	lm	ll	ll	lm	ll	ll	lm	ll	lm	ll	ll	lm	ll	lm	lm	lm	ll	lm	lm	ll	ll	lm	lm	lm	ll	ll	lm	ll	ll	ll	lm	ll	ll	lm	ll	lm	ll	ll	lm	lm	lm	lm	ll	ll
Marker38529	<nnxnp>	np	np	np	np	nn	np	np	np	np	nn	np	nn	np	nn	np	nn	np	nn	np	np	np	nn	nn	nn	nn	nn	np	nn	nn	np	nn	nn	np	np	np	nn	np	np	np	nn	nn	np	nn	np	nn	np	np	np
Marker24903	<efxeg>	ef	ee	ef	ee	ef	ef	ee	ef	ee	ee	ef	ee	ef	ee	ee	ef	ef	ef	ef	ef	ee	ef	ef	ee	ee	ef	ef	ef	ee	ee	ef	ee	--	ee	ee	ee	ee	--	ee	ef	ee	--	ef	ef	ee	ef	ee	ee
Marker11610	<lmxll>	lm	ll	lm	lm	lm	ll	ll	lm	ll	ll	lm	ll	lm	ll	ll	lm	ll	lm	lm	lm	ll	lm	lm	ll	ll	lm	lm	lm	ll	ll	lm	ll	ll	ll	lm	ll	ll	lm	ll	lm	ll	ll	lm	lm	lm	lm	ll	ll
Marker36305	<nnxnp>	np	np	np	np	nn	nn	nn	np	np	nn	nn	nn	np	nn	np	nn	np	nn	np	nn	np	nn	np	nn	nn	nn	np	nn	nn	np	np	nn	np	np	np	nn	np	np	nn	nn	nn	np	nn	nn	nn	nn	np	np
Marker25110	<lmxll>	lm	ll	lm	ll	lm	lm	ll	lm	ll	ll	lm	ll	lm	ll	ll	ll	lm	lm	lm	lm	ll	lm	lm	ll	ll	lm	lm	lm	ll	ll	ll	ll	ll	ll	ll	lm	ll	lm	ll	ll	ll	ll	lm	lm	ll	ll	ll	ll
Marker18672	<lmxll>	ll	lm	ll	lm	ll	lm	lm	ll	ll	lm	ll	lm	ll	lm	lm	lm	ll	ll	ll	ll	lm	ll	ll	lm	lm	ll	ll	ll	lm	lm	lm	lm	lm	lm	lm	ll	lm	ll	lm	lm	lm	lm	ll	ll	lm	ll	lm	lm
Marker1857	<lmxll>	ll	lm	ll	ll	ll	lm	lm	ll	ll	lm	ll	lm	ll	lm	lm	ll	lm	ll	ll	ll	lm	ll	ll	lm	lm	ll	ll	ll	lm	lm	ll	lm	lm	lm	ll	lm	lm	ll	lm	ll	lm	lm	ll	ll	ll	ll	lm	lm
Marker11410	<lmxll>	ll	lm	ll	ll	ll	lm	lm	ll	ll	lm	ll	lm	ll	lm	lm	ll	lm	ll	ll	ll	lm	ll	ll	lm	lm	ll	ll	ll	lm	lm	ll	lm	lm	lm	ll	lm	lm	ll	lm	ll	lm	lm	ll	ll	ll	ll	lm	lm
Marker21830	<lmxll>	lm	ll	lm	lm	lm	lm	ll	lm	lm	ll	lm	ll	lm	ll	ll	lm	ll	lm	lm	lm	ll	lm	lm	ll	ll	lm	lm	lm	ll	ll	lm	ll	ll	ll	lm	lm	ll	lm	ll	lm	lm	ll	lm	lm	lm	lm	ll	ll
Marker41799	<lmxll>	ll	ll	lm	ll	lm	ll	ll	lm	ll	ll	lm	ll	lm	ll	ll	lm	ll	lm	ll	lm	ll	lm	lm	ll	ll	lm	lm	lm	ll	ll	lm	ll	ll	ll	lm	ll	ll	lm	ll	lm	ll	ll	lm	lm	lm	lm	ll	ll
Marker1853	<lmxll>	ll	ll	lm	ll	ll	lm	ll	lm	ll	ll	lm	ll	lm	ll	ll	lm	ll	lm	ll	ll	ll	lm	lm	ll	ll	lm	lm	lm	ll	ll	lm	ll	ll	ll	lm	ll	ll	lm	ll	lm	ll	ll	lm	lm	lm	lm	ll	ll
Marker2593	<efxeg>	ef	ee	ee	ef	ef	ee	ee	--	ee	ee	ef	ee	ef	ee	ef	ee	ee	ef	ee	ef	ee	ef	ef	ee	ee	--	--	ee	ef	ee	--	--	ee	ee	ef	--	--	--	--	ef	--	--	--	--	--	--	--	--
Marker30280	<lmxll>	ll	lm	ll	lm	lm	lm	lm	ll	lm	lm	lm	lm	ll	lm	lm	lm	ll	lm	ll	lm	lm	lm	lm	lm	lm	lm	ll	ll	lm	lm	ll	lm	lm	lm	ll	lm	ll	lm	lm	ll	lm	lm	lm	ll	lm	lm	lm	lm
[truncated: 58 more columns]
