# Supplementary material for: A High-Density SNP Genetic Linkage Map and QTL Analysis of Growth-Related Traits in a Hybrid Family of Oysters (Crassostrea gigas × Crassostrea angulata) Using Genotyping-by-Sequencing
Source: G3 (Bethesda). 2016 Mar 17;6(5):1417–26. doi: 10.1534/g3.116.026971 (PMC4856092; doi:10.1534/g3.116.026971)
Supplement: Supplemental Material [file supp_g3.116.026971_TableS6.xlsx]

## Sheet: Sheet1
Table S6. Sequences of 1695 mapped SNP tags produced by genotyping-by-sequencing in a hybridized family of Crassostrea gigas and C. angulata.
Marker11	AAAATCCACTGATATTCCCAAAAATTGACTGACATTGTCTGACATCCACTGTACATTGACTGTACCTCACTGTACATTTCACTGACTT
Marker72	CGGATAGGGCCATGTAGTTCATTATCGCATCATTGACGTTTAAGTCGATAGTACGATGACGATGATGCGGTGGTGCGATAGCGCGACA
Marker122	CTTCATCACTTGGTTTATTTCTCTGGAACTGCATACTGGTGGACCTTCGGGAATACGGCAAACCTACCCTTCGTTTTTACCTGACGGC
Marker127	CTGTCAGGTCAAACTTTCCGAGCAAGTGGTTATCCTTGGTCATTGGACGTTCTCCTTCAAAGACCTGGATGGTCACAGTTGGTTGGTT
Marker128	CGAGGAACACATGGAGACAATAAAAAGACCTTTCACCTTTCGGCCCACCCCTTAAACATCATACAAACACATCCGGAACTTTCTGTAG
Marker130	GGTGAATTGCGATCATTAGCAACAGCATGGCTGAAGCTGTGGAAGTGCTCCACATGAAAAACAACGGAACTTTGCAATAGATGTCATC
Marker149	GCTGTGAGAAAGTTTGAACGAGCCTCGGTACTTGATATTCCTATGTAGTATGTACAATAATGCGCCTAAATGTTAAACCGAATACATC
Marker203	AGCTCGTCGGAGGGCAGTTGCGGTGTGACTCGCAGGGGGCCGTTCGCGGTCAACGCTTGTCGCTGCTGCGATCTCGTTCGACGACGTG
Marker206	ATTATTATCTTTACTTTTATGCAATATTTCCCTATTATCGTGAATAAACATGGCATGATTTGGATGCAGCATCCTGGGGGTTTGGATG
Marker211	ATTATAACTTAAGGGACAAACAAAATATCACTAAATAAATAGATTTTATATTTGATACGAATATCTAAGTAGCAGCTAGGCTAGCTAA
Marker244	CAGCGAAAAGGTGCGATTCGGACTTATAAAGCATCAGATGATGAAAAATACCGAGTCGCTTCTTCCGACTTTGACAAGTACTGCACAA
Marker257	GCATCAGCTGAGCAAAAGTGACGTTCCCACACCTTCAAATACCCGCCGGCGACCAGAGTTTGACCTGACCTGTTGATTTCTTAGTCAA
Marker268	TGTATCCCCCGGTAGAGCCTTGGGTAGAGGGCCTCTTACGGAAGGTGTCCAAAGACGCCATATACCCCTCATCCACAGGCCCCGGGCG
Marker270	AAAAAGACGGTAAATGACAAAACTTTAAAACACAAAGCAAACACTTAAATTTATCGAAATTTTAAGTATCTGCTTGAACACAATTGAA
Marker302	ACGGACACGCACAGGGGGAGTACTCGCGGGCAATCTCGAGTCTCTCTTCCCCCTGGTTAACGCGACACACCTCGCCCGGCGGCGTCGG
Marker352	AGCTCGTCGGAGGGCAGTTGCGGTGTGACTCGCAGGGGGCCGTTCGCGGTCAACGCTTGTCGCTGCTGCGATCTCGTTCGACGACGTG
Marker392	AGTCTGTGGAACCTGCACCCGCAAATGTGAAGATTGTCGTGGCCGGGTCTGCTTCGCATGTAACAGGGTGTGTACATCTTGTGGTACC
Marker424	GAAGGCGAACTATCTCACAGGTACGTTCGCAAGCGATCGCGAGCGTTTTGGAAAACACCAGCGTTCAGAAGCGAGCGCTCGTGAACAT
Marker426	AAAATCCACTGATATTCCCAAAAATTGACTGACATTGTCTGACATCCACTGTACATTGACTGTACCTCACTGTACATTTCACTGACTT
Marker433	CGTAGCGCCGGACGAACTCCCCACTTACAACGGGGGGTCGCCCTGTATCGAGACCGATGCCAGGCGGTGTGTGTTTTGTCGTGTTTTG
Marker439	AGCTCGTCGGAGGGCAGTTGCGGTGTGACTCGCAGGGGGCCGTTCGCGGTCAACGCTTGTCGCTGCTGCGATCTCGTTCGACGACGTG
Marker459	AAAATCCACTGATATTCCCAAAAATTGACTGACATTGTCTGACATCCACTGTACATTGACTGTACCTCACTGTACATTTCACTGACTT
Marker485	AGCTCGTCGGAGGGCAGTTGCGGTGTGACTCGCAGGGGGCCGTTCGCGGTCAACGCTTGTCGCTGCTGCGATCTCGTTCGACGACGTG
Marker535	ACGGACACGCACAGGGGGAGTACTCGCGGGCAATCTCGAGTCTCTCTTCCCCCTGGTTAACGCGACACACCTCGCCCGGCGGCGTCGG
Marker614	CTGTTAACGAACAAAGACTATTCGTTAAGTAAACTGGAAAATATCCACAATCCCAGGAAAGGAATGCATGTCGGTTGCCCAACTCCAA
Marker631	ATTCCGATCAAGGAAGGTGTTTCGAGGCAGAAATTATTCAACAACTGTGTACCATTTACCGCATCAAGAAATCAAGAACAACTGCTTA
Marker703	CCACTCTGGTGGTTCTCTTCCACTTCCTGACCAAGTACCGCATCCTGCAAGAACAGTAAAGGGAGAGAAATCTACTGCAGCTGTTAAG
Marker763	AGAAATTTTGAAAAATGAAACTGCATAGAAACCATATGATTTGTGAAATGACTTGGTGAGTGTTAATCATTTTTAATGTTGTTACATA
Marker907	TTTTTTTTAGACCTGACTACTAAGAGTTTTATCCTAGTTCTTCACAAATTGTTTAGAAGTAGTTATGTTTCAATAACAATGTGCCTTT
Marker908	AAACACTGGCTGTACAAAACGATTTTCACATGGTAATAATAAATACCTGTACATGTAGCAAAATCCACAAAATTAGGACAGCATAAAA
Marker913	TCGAGGAATTAAGCGTCAAAGTCCTGAAGCGAAAGTCCGAGTAGCTTAGTCAATATAGTCGTGGACATGGCCCAGGCGACCCGGGTTC
Marker1135	ATTGTGTTTGCAGCTACATAAATAAACCCGTATGTGCATTGCAACAATGCGTATATCTTGTGTATTGGATAACGGCAGACCGCTCGCT
Marker1169	ACATCCTCAAAAAAAAAAAATTTAAAAAGAGTTATCTCTCTTATTGAAACTGAAAACCGATGCATCCATAAAATTACATCCCCACAAA
Marker1196	GAACACTCCCTCCAACCAAACCTCCCGAGAATAATCACGTGACACATTCTCCTAATGAGAGATTAGTTCAACATGTCCACGCGGAAAC
Marker1229	GTATTCTATGAATGCAAATAAAATTCATAAAATTTTCGTTTTCTGTCGGGTGGAATATTGTATGAAACACTGCTTTTTGGAAACTTGT
Marker1385	CAGATTTCATTTGGATAGCAGTGACGGCCGTTGTAGGGTGTATCGTCGCGTTGGGGAGCGTTACCAGGACGCTTGTGTTGTGCAACGT
Marker1406	TCAAATTCAAGAAAAAACCCTAACTGTAGCTTTAATTCAATTAGAACTCCTTATTTGCAGTTTCATTATTGCATGCTCCTACAAAAGT
Marker1430	AGGTGGCCCCCACGGCTCAATGGACAGGCGCTTAGGCTTGGGGCGCATGAAACTGACCACCTCTTCCTCATCATCCGCAAAACTGAAC
Marker1452	AAAATTAAATCACACTGCATCAGATATAAAATGGAAGTAAACTACAAAATGTTGTTTAGAAGCTATTTTAACCAATAAAACTCTTGTT
Marker1504	ACATTCAATGACTTCCGGTAAGTTGAATGTAGTTGTACCATCCAAGGCTTTGACACATAATCCGTTCACACGGCGTCCAGCGACTGTC
Marker1589	GTGTCCGTCCGGTCCGCCTACCAACGCGCCGTACAGCACGTGCGGATTTGGTGCATGCTTAGTCTGGTCAGCCCAGCTGCACGGAGCA
Marker1645	AAAATCCACTGATATTCCCAAAAATTGACTGACATTGTCTGACATCTACTGTATAACCACTGTACCCTACTGTAAATCCACTGTACAC
Marker1735	AAACATTCCCGCTGGGTCACTGCGGAACAACGCCGGAACGAGTAGGGGTGTGTCAGCGTTCACTAGAGGGACCAAATGTGGGGGCGAG
Marker1809	AGGCCAGAGCACGATGAGAACTACCCCGGCCGCTCCTCCCACCAACAGCCCAAGGAGCCCCCTAGGCTGTACCTCACTGAAGACCAAC
Marker1820	AACATGAAGTAAATACACAATTTCAAGAAACNTTTTTTTCCCAATAAAACACCAGGACTTAATATATTTAACTAAAGATACCTAGAAG
Marker1847	AACTTGCCTTTACTGTGAGTGTTCTTTTTATCATATCTACACAGTGTCATATTTTGGATTTTTGAATTTGATAAGAAAATAGTTCATG
Marker1853	GCACCAGCAAACAGTACCGCGGTGTGAGCTGTGACGCAATCACGTGCCCCGGAACTCCATCCCTTGTGGTCACGTGTTGTGCTGCTGG
Marker1857	TTGCACCCGCGAGGGAGACGAGGAGCCAGCCAAGGCAGAGGTGTGGTGTCAGACATGTAAAGTGGCCTTCTGCGACGCTTGTATCAAA
Marker1952	TTTTTGTCCCCCGCCGCAAGGCGGAGCGGGGACATAGAAATGCCGTGGGTCCGTGCGTCTGCTTGTCACACTTTTTTGTAAGCGCTCT
Marker1986	AAAAGAAATTCGTAGGTCAATTGAAATCTTATTTTATGCAACCTGATTAGTGACATTATTTATTGAACGCCCCTTGTACATGTATATT
Marker2004	TTGCTTTACAGACGCTCCATTTCAACGACATTTTCGGCGAGCCTGACGGTACCCACAGTATTGACTGCGTCTGGAAACTGTCCCACGC
Marker2035	CACCGCGGGGAGTACACCGTGGACGGACGCGAACTCATTCTGGACATTCTAGACACCGCGGGTGCACATTCATTTCCGGCCATGCGCA
Marker2039	CACCGCGGAGAGTACACCGTGGACGGACGCGAACTCATTCTGGACATTCTAGACACCGCGGGTGCACATTCATTTCCGGCCATGCGCA
Marker2040	CACCGCGGGGAGTACACCGTGGACGGACGCGAACTCATTCTGGACATTCTAGACACCGCGGGTGCACATTCATTTCCGGCCATGCGCA
Marker2067	TACGTAAGAGTTATCTATCTTTACCAACATTGAACATTTTTGCTAATTTTGTGCTAAATAATCAATATAAAGTCAACTTTTTGTTATT
Marker2097	TTGCAAAAGCTCCCAACACATGCAACATAACCAGTGGCACATATACAAAACATCAGAATTTATGTGCTGTGTATATAAATCAAATTGT
Marker2099	GTCGAGTGACGCCGATCAGCAGAGCGCGCTTTATATAGAACGAGCGCGGACGTCTGAGAAAGCACCCAACAGTGCGAGCTTCAATTTG
Marker2124	AAACAACTGTACCTTAGCTGACTGATCCACTCGAAGTCGTTGGCGTTGGCCACATTCTCTTCCACCATCCTGGCGACCACATCTCGGG
Marker2127	ACCCACACGGAGTGAGAGGTTTCTTCCAGCATGACCACGGGGACATCCGGCAGAACTTCGTCAATGATTTCCCTGGGAGGTCTCCCTC
Marker2128	CGAAGCGCTCCGAAGAGCAAACATAACCAAATGGACCTCAGTGAGGCCCGGGGGTGTCATCATGCGAGAGGAAGGTACGGGCGAGCCC
Marker2264	AAAATCCACTGATATTCCCAAAAATTGACTGACATTGTCTGACATCCACTGTACATTGACTGTACCTCACTGTACATTTCACTGACTT
Marker2280	ATGCCATTTGGTTCTGATGTTTTCACATCTTTTCAATATTTACTAATAACAGATCTTTTTTGTAGACCTGACTACTAAGACTTCACAA
Marker2290	ATGCTTGAGTTATCTATGCTCTGTTTCTTCTTGTTTTTCACAGGAGCTTTGTCCATATAATACTGTTCACAGGCATCACTACCCACAG
Marker2324	TACTCACCCCAACAAAAAGGCCCACACCCAGGGCAGCCCCATCAGGAAGTGAGAGGCCACCCCCACAGTTAGACACTCCACCAGACAG
Marker2355	AAGGCCAACTCTGTCGACATTGGTATTCAGGTCAACAAATGCTGCAAGAGCGGCCTGGAGCTACTACAGGAAGACGTCAGGAGCCCCA
Marker2358	AAAATCACTATGATATAGCAGCGTGTATCGGATGTATTCAATAATGGTATTATGGTTTGCTTTGGGATGGAAATAATGATGTAACTTG
Marker2377	TCTTGGCCGTCACTGTACCCCCAGTAAATGACACAAGGGGTACGTCTGGATGTTTGACAAGGGCCTCGCCTGCCCGGGGACCGACTAG
Marker2378	GGACACACGAGCCAGGTTGTTCAGACGGTTTCTCTGGGCGATAGCAAGCAGCTGTTGGCTTCTGTACGCCTGCTGCTGGGCTCCGAAC
Marker2390	TGAAATGTATATGTAAAATATACTTGTAACGCATCAGTCCTTTAAGGTCAAGGTCAAAGGTCATGGTCAGGTCAAAGGTCAAGGTCGA
Marker2395	CACATTAGATCTTAAGGGAGGGGGAGTGTGGTGGTTTTTCCTTATTTTTATTTTAGAGTTATTTCCCTTTAACCCGACCGGGCGTGGT
Marker2503	ACTTACCTGCGCCACCACTTGTAGTGGTTATAGTTGTCGGCGTTGTGGTGCTCGATGTTGACGAACTGCTTCCTCCACCTGATCCCAG
Marker2535	CGTTCACATGGGCTGGATCTGTGTAGCAAAGAGATAGACATTGACGCCAGTGAGGATGACAAAGACAAGAATGGTCCTGTTGTGCCTC
Marker2580	TCAGGTAAGATAACGCTTAATCGTTTACTCATGAATATTGCTATAACAAAAAATCTAAGTCTGTGAAGAGCTCAGTTTCAGAGCAAAT
Marker2591	ACCTTGTTTTATTTTCTTGACAGAACTAGATAGAGCAGCTGCCCTGAGCTCCAAACTTCTGGCTGCATTACCAGCTCATGTAACGTCC
Marker2593	ACGATGCAGCACCCACGCTGGCCGGATTTTGCGTGGTTTGTGGGGGGTACCCCGGATAGGCAGGGTGGAGTTGAACATTTTGGAAGCG
Marker2611	TAGTAATGCATATGTTTTTGCATGTCTTGAATACGTTTTTATTCTGAAGTTAACTAGTCTCTTAACGAATAAAAATTTAAGTTGAATA
Marker2650	ATCCAGGGAGGTACTGTCCACTGCTCTCTATGGCAAGTTATTCCAGATCCAGATACTATCTGGGAAGAAGGAATGCTTATATAACAAG
Marker2655	TACATGTATCGCCTGATCGACTGTAGTGTGGCATACTGGGATGTTGTCCCCTCCAAGATGAGTGACTTTCATAAGATCCCCTTTCTAA
Marker2687	CCGACAGAATGGGGTCATGAACCAGAGAGTGATGACGGGGAAGAGGCGAGCAGGTGCCCCCCAGATGACGGGTCTGGCGCCAATGGAG
Marker2696	CATGGGACTTCATGAACTATGGCGCCGTGCGGTGTGACGACCTCCGATTTCCGGGATATTCTAGGGTCTTCCGGTACCAGTGTAGACG
Marker2722	TCTGACTTAACATGATGAACAGTGCTTTATGACACCTGAGTTTCAATGTTTGCCATATGTTTCAGTAAGCCCCGCTACACAGAGACGG
Marker2748	GTCACGGCCACACAAGAGTACGTCCACACACTCTACAACAATGGAAGCACCTCTAACGTCAGTGATGCGGATTTCTTCTGGGCAGTGG
Marker2782	CTTAATGTATCATTTTATGCATCTAGGCATGTGCAACTCTAACTTTGAATTTTTAATCAAGGTGAACAAATATGCCCCTCAATTGATA
Marker2788	CCTGGACCTCAATATAGAAAATGAGAACAGCCCCAAGATGGACCATCATTCCACTGTGGGGGATGCTGGAGGGGTGAAAGAGGGTTTG
Marker2822	TGGGTATATAACAGATATGTATGGGCTTAATACTTGGTATACTTTGATATAATTTTCATGTTTAAGTATCAGTTTATAAGAGTGGCAT
Marker2868	ATCTATCGATGTTCATAGGTTCCCTCGCGACTTGGATACGCTTATTGGTGACGTTTTATAGCTAACACATCCTCAATCGCAACTTCTT
Marker2924	GCTATCAAGATTTTGTCACTTCCATTTCAGATACGGAAAAAGAGTAAAGCACACGCGGGGGGCCTGCAGGAGGGAGATGTCCTGCTTC
Marker2929	TAAATAATAATTTTATATGGCCTAACACAAGATTTCTAGACTTAATACTAAAAAGACATAAAACTTATTCCCTTAAAAAAAAACACCT
Marker2933	CCTGAAAAATGAACCAAAAACTATCAGCCATGTCATAGAAACAGGCTGAAAATACCAAAAATCTCACAGCTTTATACAACAAAACCCT
Marker2935	ACGTTGTAGTCATCTAAAAGAAAATTAAAGATTTAGTAGGAAATGCCTAAAATAAGCATGCAGTGAAAAATTTAGAGCTATTTTGAAT
Marker2993	ACACAAAGAACATGAAGCTTGCTGACGATGTAGATTTGGAGCAGGTGGCCCAGGAGACCCACGGGCACGTGGGAGCTGATTTAGCCGC
Marker3036	ATGCGTTGTCTTCTTGGCCTCGAATGGGCCGTAGTGTGTATTCTTGCTGATAGGCCCCTGGGTGAGCACTGCTACCTCCTGGCCCGGT
Marker3043	TCTCTATTGGCCAAACTCGCAACTGGGCCAAAACCGTCATGTACTGGAACATCGCACTAGATGATAATCATGGGCCAAAAGTCGGCGT
Marker3057	TACGTAAGAGTTATCTATCTTTACCAACATTGAACATTTTTGCTAATTTTGTGCTAAATAATCAATATAAAGTCAACTTTTTGTTATT
Marker3068	TGAAGCAAAGACGATTACCAGACGCACCCTATTTGGACATATTTCCCAGTCCCAGCAAGAAGACCCTGGGTCGTACTGCAAAACCAGG
Marker3093	CATACAGAATAGACCATTAAACAACCACATCATTTTTTATTTGTGTAAATAAGTAAAAAATTGTTTGCTTGAAATTGTTTAGATTTTC
Marker3102	AAAATAAAATACCTGCCTGTGTTACATTTTTACATGTATTTTGAAATTTTTGCCTAAGAAATTTAAGATTTTTAATTGGCCATTATAA
Marker3125	CATGCCGTTAATGTAAAGTTATCTCCCCTGTTTCAGGCGAGGCCCTCTCGTTTTACCTGTCCCGCCTGCTGGAGTTGGACAATGTCCC
Marker3129	CCTCACACAATGGACGCTCCACATCCTGCCCTCCCAACCAACATGTTGCTGATGAATGACCAGCGATCGCGATCTATGTCGTACACCT
Marker3134	ACCATATCTTATTCACATCGCACAAATGTTTTATCTTTAAAGAATGATAATTGTTTGACTTTGCATGGTGCTTAGGTTGTAACAGAAT
Marker3171	TTGAGATTTTGGACCCCAAAGTTCTGAAGCGAGGGTCCGCGTAGCTCAGTCGTTACAGTGGTGGACTTATACCCAGGCGACCCGGGTT
Marker3226	AGAAAACTAGCAACCAGCAACCGACAGTATCATCCACGCCTTTGGACTTAGCAGACTTGGCTAAGTTCGAAAATGCAGAAAACAGAAA
Marker3242	GATCTGAATTAAAAAAAAATATAAACCTAAAACGTATTGATCATGCATATTTAATAATCGGTAATAAATTAATCACATCCCCTTGACA
Marker3310	AATTTCAGACAAATGATAAATCCCATTGGTCCAAAAAACTGAAACAGAAGAACACAGAACAATCCACAAAGTTCTCCAAAGTGTATGC
Marker3346	ACGTTATTCCTATATAAAAGCAGTAAAATTTTCTTAAAAATTTTTAAAAAGACATTCAGTATAACAAAATAAATAGTGCCTGTTTGGG
Marker3356	GAAAATAAGTCAACCAGACGCTACAAAAGTGGAAACTTGATCTGTAGTTTGACATTTTGAAGCTGTTCACCAAATTTCATATTATTCC
Marker3412	AGAATATTAACGAGGCCGAGTACAGAACGAGTACGCACGCTTTCGCGCAGCGTTTCATTTGTATTGTGACGTCATCTTTTTGCTTGGT
Marker3558	AAATTGTGTGACCACCTGTATACAATGAACTCTGTGACCCCTTACCTCTGTGGAGCCAGTGAAAGCCAGCTTGTCGACATCCATGTGA
Marker3623	GAAGTTATAAATCCCACTTTTTCCGGCATTTTCTAACCAATCCAGGTGATACTAAAATATAATACGATTATATTTCTCTTGTTAAACC
Marker3648	TAGTTGTTCACCTAACATAAGTATTCTTTAACCAAACATTCGAGTTTAAATTGTGTTCTTTGTACAAACCCATGAATACTGGTGGTTG
Marker3676	TTGAGCAAAGTCATTTTGTTTTTGTAGACCTTGGCAGTCCACACAAGATAAAAGAGAAGAGTTCTCCTTTTAATAAGTTCAAACATCA
Marker3682	GGCTCAACCAATCCTGGCAGTCCAGGTCCGCTTGTTCTAGGCTCTCATCAAGCTCCTCTTGTCTCTGTGAAGTGGATGAGGCGGATGA
Marker3700	CATAGCTGTATCATCATTTGATCACATGTATCAGAACAACAAGCGCCCCCACTCCATCATCTCCATCAGTAGTACCTCCTCCTCCAGC
Marker3721	AAGACTACACCGGCTCGAACCCTTGAATTGACAAGATGGCGGAGGAGTTGATCAGCCTGGATGTGTGGGACAAGCTGCTGATCCTGGC
Marker3732	AGTCTCTAAAAACACAGAGATAAAACAGCTGTACAGGAGAGAGATGCACGCACGATGGTCTAGCATTGCCTGTCACACAATGAAACAA
Marker3743	ATTATCTTTGTAGATGAAGTCCGTGAAGCGGTTCATCATACGGATGTGTTCCGTGATGTGCTTCTCGTGATGTTGAATGAGGAGCGTG
Marker3745	GAATGTCGACACACACGGTGGCTGACCGAAATGAGTGCTACTTGCTTTGTGAGGCCCAGCCCAGCTGTCTCGCTGTCAAGAGTGCCAA
Marker3769	ATCAAAAGCAGAAGTGTGTCACCGTGGTTACAGCTAGCAGGGAGGGAGGGAGGCAGCACGGGGATAAAAGGGCCACTTGTCACCCTCA
Marker3796	TTAATGTAAAATGGATTTTGTTTTATTAGATTACTTATGTTTGTCTTTGGGTGTTTCTAACAGAAAAAGTTTGTCTGGTTTTGACCTG
Marker3800	CCACACCAAAATAAGCGGAAGACAGAAGGGACCTAATAGCCCTGTCAATGGTTGGACTAACTCTGAATGATTTGTTACTCAACACAAC
Marker3806	CCTTTAATATTCTTACTTTGGAAATCACAATAATTTCCTGCATGATTGTTTGCTAATTTCCTTCATTGAAAACTACAGTACATACCTT
Marker3864	CTCCTATCCAACATGGCCTCTATCGCCTGCCTTGGGTTAGGACTTGTTTGAGCATGGGTGACCTTTGTCCCCTGCTTCCTGGTGGGTG
Marker3893	GTTCATTTACCTATTTTTACATTCACTAAATTGTACATGTTACTAGATACCGAGTATAACAAAACAAATCAAATACCAGGCGAAAATT
Marker3990	GATTACAACTAAAATTTACACGAGAGCCTGTAAGTTCCATATTTTTATAATTATAATTAATTTGCAAATAACTTGTTTTTCATGTACA
Marker3993	TTGCATCAATTGCCTGTTTATTTCTCTGGAACTGTATACTGGTGGACCTTCGGGAATACGGCAAACCTACCCTTCGTTTTAGCTTACG
Marker4004	TTGGAGGGCCATCTACTCCGATTACCCCACTGAGGTCTCCATCCATTTCCGCAGCCCCATTGAGGTTGACATGTATGGCATTAAACCT
Marker4042	GTTGGGGTACAAAACTCGTGTGATGTTTTCCGCCAGGTATCTGTCGTGTACAGCCTGGAGATAGGAACCGTTGTTAAAGAATTTCAGG
Marker4114	AATTTCAGACAAATGATAAATCCCATTGGTCCAAAAAACTGAAACAGAAGAACACAGAACAATCCACAAAGTTCTCCAAAGTGTATGC
Marker4122	TCCTCTGTTTTACAGATGGCGTCGGCTAACGACTCGAAATGGCAAAAGGATGCCGCAGACCAGAATTTCGACTACATGTTTAAGCTGC
Marker4124	AGTCGGTCCATGCGAACCTCCACCAGCATGACTAGGGCTCTGCACACATTCTTCCTGACCTCCGTGTCTTCGTCCGTAGCCAGGAAAA
Marker4146	GTTAAGTTTCCCGGACCTTGCGGAGCGTTAAAATAAGTATGTGTCCGGGAGATTGGAGCCGGTCCGTGATAGATGCCGATGTTATAGA
Marker4154	ATTTTGCATATTGTTGCCTGTAATATAAATCTGGACATTCTAGGCTATTATTTCATTCATTAATTGTTATAATCACGATATTATATTT
Marker4167	CCCACCACGTTCCCGGGGACAGGAAGTGCCATCAGTTCCACACAGGTCACATAGAGGGCATGGGCAGCAGGTCCCGGGAACTCATTGA
Marker4284	CTACGCACTGTGAACTTGCGCGAGAGTTGGTGCACGGTGCGGCGTAACAGCGCCATAGCCAGCGCGAAATCATTGCGCGTAAAAATAA
Marker4296	ATGCCATTTGGTTCTGATGTTTTCACATCTTTTCTATGTTTTCTAACAACTAATAACGGATCTTTTTTTGTAGACCTACTACTAAGAG
Marker4376	TTTATTTGAAAGTTTGACTATTACTACCTGATGTCTGGGGCGTCCGACAATGGAGGGGAACACAGCTCTGGGAGCATCGTCTCCGGCA
Marker4421	CTCCAGCTGTAGCTCACTGCTACTGCTGACCCCGCCTCCCCCTGAGTTCCTGCTGCCTCCCTGCTGGTCACTGCTACTATCCACACTA
Marker4428	CACTTCTAGCTTGGGTTTTCCTCCATCATTGATCACCGTGAACGGCCAATGTTTCATGTCGGACTGTACACTGTCGTCGTTGAACTTG
Marker4435	AACGACATGATCGTGGACAACGCCAGTATGCAGGTCAGTTATATCTCATAATTACGTACTCCTCCTCTTATAATACTAGGCAATACAT
Marker4471	ACTCATACGTCAGGATTTTTAATTAAATTGAGCAAATATGTAGTCTTTTTGTTAATTTGAGCAAGTCATGTTTAACGATTAAAAAAAG
Marker4496	TATGTAAAGCTATAGGAAAATATTCAAATTTTAAAGCTTATATAAATGGAATTTTTCTTTACCAAGTATGGCTTAAAACGCCATTTCC
Marker4519	CATCAATTCCACAAGTCTCTGCTTTCACAGGAAGCCAACATCCAACAAGAGGCCAATCGTCATCTCCAACATTTAGGCCCCCCTTCAA
Marker4621	AGGGGTACTAAGGCCAAAAAAAATGCTTCCATCCCTGCGCGCCGCCATATTGGCATCTCTGTATCAAAATTTCAGTGATGATTGTTAN
Marker4664	ATACACAGGACCAAGAACAGGAGACACAACTGTCCACGTCCCATGTTGAACCGTGACGGGTCGAGAGAGAGATCTGGATTTAGCGGGG
Marker4677	AAAACCTGTGGGTCATCCCGTGGGTTAGCTCCATCCAGGGAGGGGGACCATGGACCCCCTATGGCCATGGTTTCATTCTTCCCTTTGA
Marker4698	GGAGGGAGGCAGTGATGGAGGAAACGATCTGGGCAATCAGACGGTTCAGGTTGGTGTAGGTTGGTCTCTCGATGTCCAAGTTACGGCG
Marker4709	AAGACGTACAGGCAGCAAAAATGAAAACAGTGTGATTAATCGCGCGTTCGGTTCCGACATTTCGACCGTCCGATCAATGCATTCTGGG
Marker4739	CTGTGTGGTGGGAACTCCCCCGACCTGTACAGCGATGGGAGTGTCCGACACTGAGTGGAGGCTTCACGGACACCACACCTACTACGTG
Marker4809	ATTTGATCATGCAATCATATCAACCAATTCAAACGGGAAGGTGATCCAGGTGGCATATCCATTACCCATATTAAAACAACAGTGTTCT
Marker4822	CCCACATGCCATCCCTGTACAATGCGATGGCATGTACAATAACCCCCTCTACTCGGGGGTGGGTGAGACACCCTTCCAGCCGGCGACA
Marker4826	CCCACATGCCATCCCTGTACAATGCGATGGCATGTACAATAACCCCCTCTACTCGGGGGTGGGTGAGACACCCTTCCAGCCGGCGACA
Marker4845	TTTGAAAACACGTCATTTTTTCAAATTTTGTTTGTTCAAGTGCATCTATATCATTTTTTTTTTAATTTGTGCACCATGAATAAAAGAT
Marker4913	AGTATTTTATTTAAGTCTCCAGCTGCGCAGTTCTAAGTGATTAAAAATGGCAATGTACCTGTGTGCGCAATTTGCATACAAAACAATT
Marker4914	TTAATTTCAAGGCACCATAAATCAACGTTGAATTAGCGAAAATTTATCGTGATTAAAAATTGCGTGAATATAGCGAAATTTTCTTCTG
Marker5097	CTCCGTACCTCCATATCCACGGACATCCTTCCCACAATGCTTTGCTCATAGATTTGCTGATCCTCTTTTGCAGTAGACTGATGAACAG
Marker5100	TGGGTGTCAGACAGAGCTTTAGAGGCATCAGTGACAGACTGGGATCGTAAAGGCTTACGGAAATAGTCATCTTCCAGCAACAGTTTTT
Marker5101	GCAGACAGAGGAGACGAGCACGGACTGGAGTATAGGACTGTGGCCCACACTGCCGTACCCTGGATCAGAGTGGGGGGTGTGTGCCGTG
Marker5127	ATGAATAAGTTATTGTCCCCCGCCGCAACGCGGAGTGGGGACATAGAAATGCCGGGCGTCCGTCCGTGCGTCCTTGTGTCCGTCCGTC
Marker5139	AAGTGAATATCAATAAGCTAATCTGGACAGACGAATTATTTCCGGACACATCCGATTACTCTTGTCCAGCCCGCTTTCCTTGGAAAAC
Marker5143	ACTAATTATAGTACATAACATGCAGTACATTTCATCAATTGGTTATATTATTTTTACGCGCAGTGAGTTGGCGCTGCCTGTGGCGCTG
Marker5144	ACTAATTATAGTACATAACATGCAGTACATTTCATCAATTGGTTATATTATTTTTACGCGCAGTGAGTTGGCGCTGCCTGTGGCGCTG
Marker5154	GGGGTGAAGGTCGAACTGGGCACACGGTCTGAATATCCGTCAGGTGAAAATCGGTTTTCCGCCGCGTATAGCCGGTTGTTCTTTTTGG
Marker5169	TTCATAAAATTTCTCAACACATATGTTAGATGAAACTGTAATCAAAGTACTGTAAATGAAATATCTAGTGACCAGAGTACTTTAAATG
Marker5203	GTGATTTTATTCTTACTTCCGGTCCCCTTGTCTTCTGCCGACACGGTCAATATGCTGTTGGCATCAATTTCAAACGTGACCTCGATTT
Marker5208	CAGCGGTCAGGATCCTCTGAGAGGAAGGTCGGGGTGCGAAGTCGGTCCCACGCATTAGGAGGGTACCGACCGAGAACCACCAGGTTTC
Marker5248	CGTGACAGTTGAAATAACAGAGATCGCAACAGTTGAGGTTACAGAAACAGTAACGGTTGAGGACACTCCGATGACCTCTAACCCTTCA
Marker5262	CAAACAGAGGGGGTATGGAGGGTAGGCCCTGGTAGCAGGTCCTTGAGCGGGAGAAGGTCTGTAGGAACAGCTGTTTGTACGTGTCAAA
Marker5268	AATACATGATTATTCTTATGATGGGGAACATTTTATAGTTACTGATAAAGATTAGGCGTCGGAACGGGGATTGCGGGTGGAGGGAGGG
Marker5299	ACTGTTCAGGAGGCACACAAGAGGAATATGGAGGTTCACGCTTGGTTTAACCCTTACAGAGCCCGGAGTGGTAGTAACTCAACCTCGG
Marker5327	ATCATCTTACATTTTGTTAAAGGTGTAAAAGAATAGAGAGAGAGAGAGAGAGAGAGAGAGAGAGAGAGAGAGAGAGAGAGAGAGAGAG
Marker5332	ATTGAACTCCTACATATTATGTAACCACTCGAACACCCCCTCTCCTTTGAGACCTTTACGCATGCGTCGACAGTAGTCAAGAAACTGN
Marker5354	TTCTTCGACAGGCATTCCGGCATGTTCCACATGATCTTAAACTATTACCGCACGGGGAAGCTGCATATTCCTATGGACGTATGCGGCC
Marker5355	ACGTTATTCCTATATATAAAAGCAGTAAAATTTTCTTAAAAATTTTAAAAAAGACATTCAGTATAACAAAATAAATAGTGCCTGTTTG
Marker5446	ACGTTATTCCTATTTAAAAGCAGTAAAATTTTCTTAAAAATTAAGACATTCAGTATAACAAAATAAATAGTGCCTGTTTGGGAGGATA
Marker5503	CCTGGCAGAATAAACAAGTTCCTCTACCTGTTGTGAGATCTCGTCGCTGACCGTGGACAGGAACTGGGGGTCCGAGGGGTACATGGCA
Marker5524	AATGTCCCCCATGAATGGTATGAGTTCCATGGGTGGCATGCCGATGAATGGGATGGGAGCTCCCATGACCCCGATGAGAATGGAGAGT
Marker5531	AGCAGATGACTGTCCCCCACCCCCTTTGTCTGCCACGACAATGTCACCCCGTGGTGCACGCCAGCTGCACCAGATATAGTACTCACAA
Marker5555	CTTTTTGGTCACAGAGTTCAACTTCCGATAGTCTACACAAAATCGTAGAGAACCGTCCTTTTTACGAACAAGTACAATCGGCGAGGAC
Marker5574	AGTAGTTCTTGAGAAGAAGATTTTTTAAAATGCACCCCCCTTTTTTTACAGTTTCAAGGTTTTCTCCGCTTTGAATACAGATCTGACT
Marker5614	AATCCAAAATTATTCAAACCAAAGTTGCCATCGTCAAAGCTATTGAAACCATTGAAACCATTGTTTCCAAAACCAACGGGTCCTCCAA
Marker5617	CTTGGAGACCTGGGAAACCAACATTCAAACCAAAACCAGGAGCACCTGATGCAGCGGCTGANGGAGGAAGCAGCTCCACCAAAAGGTC
Marker5632	CAGTTTGGCCAACATAATCTGTACATATTTTGCTTGGAACCAGCGTCATAATGCAAGAGGTGAACAGTTACATCAAACCGAAAGTCCA
Marker5653	ACCCTGATCAGGGACCGCGCCCTGAAGCCCCCAGAGACCAGTGAAGAACTGATGGAAATGGTCAAGTTCACACAGGAGGCTCGCACGT
Marker5669	TTGCAGGGCATTCTTGACCATAGACAGTGTCGACCCATCCCTGATCAGCGAGGCCTGGTTCTGTAATCACTACAGGTGGATCGTGTGG
Marker5687	AGTAGTTCTTGAGAAGAAGATTTTTTAAAATGCACCCCCCTTTTTCTACAGTTTCAAGGTTTTCTCCGCTTTGAATACAGATCGGACT
Marker5715	CGGCCTGTAGCGCCTGGGTCGACGGAAGCAGCAGCTGATTGGCTCTCACTGCATCAGGGAACAGGGAGTGGTAGTTTGGGAGGGGCAC
Marker5723	ACTAAATTGGAACAGAACCTCCGCCCCAGCCGGTGTCTGAACCCACGACCTCTGGAAACTGCTCTCCTAGCGGCCAGCATTTGCATTT
Marker5731	TTGTGCTCCCTACTGTGTTAACTTCACTACTCACAGGAACTGCAGTGCTATTTAACTACACCAGCAAAAGCAAGAAGTACTTAGAGGA
Marker5758	AAAACTTGTCCAAAAGATATTTATTTGCAATTTTGTTGACACAATGTATCGTAAAATAAATGACCTTATACTTTGACCTCCAGGACCT
Marker5778	AATGTCAATTCATTTGTTAAAAACCCTTTAATTTTTTGTTTGCAGGAGAAATGATCGACAAACTGACCTTGACCTTCAACAGGACCCG
Marker5811	GGGAGTACGTACCCTGACAGGTGGTGGGGGAGGTTTGTATATAGCCAGCCTTACAGGTACACTTGAAGGAACCAATGGTGTTGGTACA
Marker5831	GTCTTCTTTTGTCGGGATTATCTGAAAGAGTTCACGTAACAATGAAACATTCAGCTGCTTTTGACGTAATTCCAAAAGATGACGTATT
Marker5847	TTCCTTATGCTAAATAGTATTTGGTTTGAAAATCTCATCGTTATTTGCTTTCTCTTCAGCAGCACAACCTGCCCGGTCAGTCCCTGTC
Marker5936	CGACTTTCCAGTCCCCCATCTGGTCAGCGAACCACGCTGCCTCACACACCAACCCACTCAGTAACAGGTACTCCAGGGTACGCTCAGT
Marker5954	TGTGGAGAAGCGGATGATCATGTAGTTGTTGTAGCTTCTGTATCTGGCCGTTGAGAGACTAGGCTGTCCTGACAAGCGGGCCACAGAG
Marker6082	CGACTGTGACCAGCTCCCAGGGGTGGAGGTACTGGGTCACCCACACAAACGGGCTGTTGTAGCGGTGGTGCACTGCATGGATGTGTTT
Marker6092	CGCGACACAGACTATTTCTATCTACCTATGTAGGAAGGTGACTGATCGACTGCGTACATCATTTGATCACAGCCACTACTTATTATTA
Marker6108	ATTAAGTAGGAACAATTCCAACATGCGACGGGAGGGAGCCAACGGGAATGTAGACGGACGATTTAGTGCTGTCAGTACCGATGACGAA
Marker6154	ATTGGGTATCTACCCCCCTCCTTCCTTCTCCACTCCAGGGTGGGGGTTGGACGGCCAGAGACCGCCAGACAAGTAAACACAACTTCCT
Marker6155	AGGCATCAATTTGTTCTTTTCTTATTTAAGATGTGACACAGCCAGAGGTTACACTGGTAATCCGAGAGAAATTGGTGGATCTTGCACA
Marker6161	ATTCCGCGATACTCAGGCTATGTGGGCATCTGGAGGCAGACGGATGACTACAAATTCTCACTCATTGGGAAAACGGAGTTACCGGCGA
Marker6186	CATCTGCCATGACTTTACTGGAGTTTTGAGAGAATTGCTTTCGACCTGCCACTGCCTATCGTTCATCATTGGGCTTGCACTGTAAACA
Marker6211	CGGTATTATACTTGCTAGCGCAGTGTTAGCCACCAGTAATTGTGTGTAAGAAATAATAGGGCGACTGGTGATGGCCAACAGATATGCA
Marker6223	AAATAAAGTAGTTGTCACAATTACAATAAATGGTTAATTGGAATTGAAAATGAAAGGTTCTACTGATGTCTGAACAGTGTTACACTCG
Marker6311	TCGCTCCATCATCTACGACACAAACGTCTACCAGTGTCAGTTCTGTCCCTTGGGCATCTCCAGTCAGCGCATGCTGGAGCGCCATCTA
Marker6381	TACAGCGAACCATACGCGCATAATTTTCGCGCATGTAACATTTTTTAATGTTACCCGTTGCCAAGTGCGTTGCTAATGCTGAGGGTAA
Marker6500	CAGTATATTTGTGTGTCATTGTGTTTACATAAATGATATCACAAGTTGTAGCATTTAAGGTCTATGTGGATGGCGATAAAAAGATATT
Marker6507	ACCCTTAGGGGGAAGTTAGCTAGGTTATAATCCCCCTGATCTTAAACTACTGGATATAACAAATTACATTGATAACAAATCAAAATCG
Marker6529	TCCACCCAGCACCAGTACCAAAAAGGGATTTTCCATAGACAGTATAATCGGAAATTCCGACAGCAATAAAAAATCTAGTCCTATACCT
Marker6534	CTCTGCAGCCAATCTCCACTGGAAAACCCCTGCATTCAATCCTTCGCTGCGGATGTCATCTGCCAGATCGGTAGGCCTCCTCGCATCT
Marker6564	AGTAGTTCTTGAGAAGAAGATTTTTTAAAATGCACCCCCCTTTTTCTACAGTTTCAAGGTTTTCTCCGCTTTGAATACAGATCGGACT
Marker6580	TACGTAAGAGTTATCTATCTTTACCAACATTGAACATTTTTGCTAATTTTGTGCTAAATAATCAATTTAAAGTCAACTTTTTGTTGTT
Marker6616	GAATTTTGTAAATCGAAAAAGTCGTAAATTCGGACACAGAAATTATTCCCAATGTAGAGATTGCAAGGGGGAGATTTCACTTGAGTTT
Marker6677	GATGTAATGTATGCTAAAGCATTGTTTTTCAAGGAAACTTATTTACAAATACCTTAAAAATAGTCAGATTTTAAATGGTACGAACAAT
Marker6693	ATAGTCACTTTCCTCCTCATACACTGGGAGATAGACCTCTATATTCTGAACAGCCTCGCTGTCCAGGGGGAGAATGGCGATCGCTCTT
Marker6722	CGAATGATTAATCTGTCTTACTCGCGGATATCCCTCACGGATATTGCACAGAAACTGATGCTGGATAGCCCGGAGGATGCGGAATACA
Marker6736	GATTGCTTCCACAGGTTTCTATTGTCCGCATCATTCGCCAGGTGTCACTCAAGTCGCGTGACAGCGCCTGCGCCGCTCTGTCAGGTCG
Marker6768	TAAATCTAAATATGGCATCTGAGTAGTTAGTTTATGGATGAACGCATCTCCATGCAATTAACCAGACACGGGGAAGTTCTTGACGTAG
Marker6824	AGCCATCAGGAAGGCAAAGGCGGGTTGTATTGCACCTACGATCACGGAACAGATACTGCCCACTGTTATGTACAGCCACTCGGGTGAG
Marker6854	TATATTCATTTTGATTGTTTCATATAAATTTCAATTTTGTTTAGGAGAATGTTTCCAGTCTTCAAGGTCAGCATCAGTGGCCTTGACC
Marker6855	TCTTTTCAGCTGGTTTTTCCAGAGATGTCACATCGAACATTCCCATGCTGAACATCCCTGATAACTGGATGACCCCGACCAACCCCGG
Marker6868	ACGTAAGTCTCTTCGGCTATTTCCGAAGACGTTTTACGTCTGAAATATGACGTCATAATGTAGACTGAGCACGCGACATTTAGTTTAA
Marker6920	GCATTTGTGATGCACAAAGTTCTATTCCTCTAATTCAGTCGCCCAAACCGGTCAAACCCAGTCTGGATGTTCAGAGGGAGGGGTCAAA
Marker6978	TTTGCTTAAATTGACAGACTGACATCAAACATCAGTGGCATCGGAAGCAAATTGAAAGGGGGGGGGGCTAAAATCTTCACAAGAAAAN
Marker7035	TCTTTTCAAAAGAAAACGTGTTCACCAATAAGATACTGAGTGATGGCTATAAGGAAGACTATATGACGAGTTCTATAGGGATGTGTGC
Marker7041	TGATTTCTATTTATCATTTTGAATTTATAAACAGACTGTACCGGTGTACACAATAATCCGTGGCGTTTGATTGGCTGACAGCTGGGCA
Marker7042	AGGTATATATTCAAAGCCTCTTAGAATTTCAAGTGGGCCCGGGATTTAAAAAAGGTCGATATTTTTTGACAAAGAGAAGACACGTTTT
Marker7050	TCTTGTTTTTATTTTACAGAAGTATGAATGGTCAAGTCCAGAAATCGGAGCCCGACCCAGACGCCATTAAAATGTTCGTCGGTCAAAT
Marker7053	GCCGCAGGAGGCCGAGTAAATCAATAGCCGACATTAAACAGATATACACCATCAGTGATCAGATCAGTTAATTCACAACAGAAAGTTC
Marker7058	GTTCGCCATCATATGATAGGCCACGCTAGCTGCGCCTGCGCTCTCACCAAACAGCGTTAGATCCTGAGGGGAGCCCCCGAAGTAGACA
Marker7064	AGAAATCTAAGACTTTGTTGACCACATCCCGGAGTTGTGTCCCTTTCTGTACGTCCTGTTTAGCGAGGACACGGCGGAACATGATTGG
Marker7136	TGTGAATTGGTCAACCTCATGCAGAAGCTGACAGTTAATATGTTTATGGTTCTTACCACAGAGACTGACAGTATGTTCATAATTCTTA
Marker7194	GTCGTAAAGAATGATGCGTTTGTATCGTTGTTTTCAGGTTGTAATTAATCTTACCTGGGGGTCTTTATCGGAGATAAGAAGTGTATAT
Marker7198	TTTATTCAAGGTTAGAAGAACTAACGTCACATTTAGAACTAGCTAACAGTTCCAATAAAAGCATACCTCAAAGATTACCTGTGTTGAC
Marker7204	AGCAGGGGCAGGTTTCAGCTTAACTGGACAGCCTGCAGCTGCTACTAAGCCAGTGGGAATTTCCCTGGGTACCACCCAGGCCACCAGT
Marker7206	TTCTGCGTGTTACACGGATTTTTATACTTCCTGTCCATTCCGTCAATGTCTATGCTTTTAATGATCTACTCCCTCGGAAATCTGCACG
Marker7222	AAAAGCGCCGTCATCAGGCGCGATAGACCAGCGGCCCCCACACGTCCCGTCAAATCCGCCGGTCCGTCACGGGAGACGACCCACAGAT
Marker7231	TTGTTTGGAAAGAACGTCTTGTGCAGTCAGCGCGCATAGCACGCCGAGAACGCGAGGTAAAAATTATTAGTACGTCATGAACGCTTGG
Marker7253	AATATATCGCAGCAGAAGGCCACACGCTAGTGATTGAGACCTCAGGCGAGAGCTCAGGAACATCGCCGATCATTTATACCACAGCCGC
Marker7385	ACTTGAGCGTCGTCTGACATCTGAGCGTCCTCGTCCGCGCTCATCTTGTCGCGGCCATGTTGAGCCAGCTCTCCCTCAAGTCTCGTTA
Marker7390	GCACCCGCACACATTACAGGAATACTTGTATACATGTAACATCATATGAAATACCGGCGAACATTTACATACCCTCACGTTTTTCCTA
Marker7412	ATATCAAATTTAAACTTATCATATACTTAATATATAAATAAGATTTGATGTAATACATGTTATGCTATGGTATTTAAAAGTAAGACAC
Marker7433	GAAAAGCCACCCCACTGCAGAAAAAGCCCGAAACTGAGGCAGAGCCAGAGACGGCAAAGGAAGTGTATCATACCAATTCTGTGCCAAA
Marker7448	TGTGTTACTGCAACGAAGACCCGTGTCAGGGCAGAGCAGGGCACACTCACCGTTCCTGCCCCACGCACCCACTGGTCTGCGTCGGCCA
Marker7480	CGAATGATTAATCTGTCTTACTCGCGGATATCCCTCACGGATATTGCACAGAAACTGATGCTGGATAGCCCGGAGGATGCGGAATACA
Marker7580	TCCCAATGTCCCGGATGAGGGCGGCCCGGTGGATGACCGCTACACGTCCATTACCGACATCAACCAGCCCACTGCTTCCGCCAATGCG
Marker7678	CCTAGGCCCCAAGAAATCCTTGTGTGTGGTAGTGTTGTATTTGTCCCAGGAGCGCTTGGATCCGGCGGACGGAGGGAGCAGTCCCTCG
Marker7696	AGGGGTACTCACCAGTCGTATAAGTTCATCCTTGATGAGGCGTGTGATTTCCTTCTTGGCTTTCTGTATTGCCATGTCACTGGTGGCC
Marker7703	AAAATTAAAAGCAGTTTAACAGGTAGGGACCAATCGCCCAAATGGGTGATAATAGCGAGCCGACGCACCTCCCGGCGAGCGAAGCGAG
Marker7745	AATATTTATTTGTTTTATACGATATAAAATGGTTTGGGGCAGTTTACGCTTTATAAACCGCGAAGCGGTTTATAAAAAAGCGTAAACT
Marker7765	AGAATGGCAGAAAAACCTGAATTTACTGGTATTAACCCGCACAAGGAGAATAAGGGTAAATCAGTTCATGTACGCAGTGTCAAGGTGG
Marker7799	CGTATACGATCGGCCGTCCATCAGACGATTTGTAAAAACGTCCATCGATGTCTCCTGTCGACATTTAAGATGATGCCTACATTGTAAA
Marker7837	CATCTTCGTCCATCGATAGGTCTTGGAATATTAGAAAATGCTACTTTTTACATAGTCATCTACATCCAGTTTGATAATTACTACATCG
Marker7867	TATGAATTTTGTGTTAATTAATAATAATATTTTGAAGAAAACAGCAAAACAGCAAACAATATTAATTAAGCTAAGAATTAAACCATTG
Marker7868	TGTACTGGGACCCATCACAGTACGGTGACCTCCAACACCTGCACGTGCAGGGCGACTGGGTGTGGCGCCCCGAGGTGCTGATCAGAAT
Marker7872	GAAATTTTTTTGTTGATTATCGAAAACCTGTTAAGTAAACAATTTTCGGACGAAGAAACAAGTAGGTATCGATTTATCGAGGGCCAAC
Marker7881	GGGAAAGCATCGCTCCCGTTCGGTACTTCGAAACTTACGGAGCTTGTCGAGGCATCGCATTCCACAAAGACATATTCATCGTCACTTG
Marker7892	AATATCCTGAGGAGTTTTAAGTTACTGACCTAACGGTGTAACTTTCAGCATGGATTTTAGTGAGACAGTTAATGAACGACTAAATGAG
Marker7900	CACTTCAGATCTGGACGAGTGTACTCTGAAGAGTGACGACTGCCAACAGATCTGTGTGGACACCCTGGGCAGCTTCTTCTGTCAGTGT
Marker7914	TAAGAATTTTGAGAGTGAATTTTTAACCGGGTTTCCGATTATTGAAATAGTAAATATTGCAGACGGGCGAGTGGCTGTCAAAAAGGTA
Marker7922	GTACACATATAACACAAGAAGATTGCCTACGATCCCGAGGACCATGAGAAGGGAGAGGAACGCGATGACGGGGGTGAGGAGGTGGGCC
Marker7923	AGTAACTTGTGTAATGAAATGGCTAGAATACTGCAAATTGTTTGAATAGTGATATAAACATTTATTTACGATACATTGCAATCATTAG
Marker7940	CATCTACGTCCATTTATAGGTCTTGGAATATTAGCAAATGCTACTTTTTACATAGTCATCTACATCCAGTTTGATAGTCATCTACATC
Marker7956	TATACGCATGATACTCAATTCAAATAGATTATATTATGATTTTATTATTTTATGTAGTAAAATCACCCTTCCAACTGTTACTCAATTA
Marker7971	TTGAAACAATAGCTCAATTAAAAAGTATGGTCCTCGGAGGAAGGTGGGGTGTCATAGTCCTCGAATGGTCGGTAATGCATGTATGTGT
Marker7976	CATCTACGTCCATTGATAGGTCTTGGAATATTAGCAAATTCTACTTTTTACATAGTCATCTACATCCAGTTTGATAATTGTTACATCA
Marker8010	CTTCATCACTTGGTTTATTTCTCTGGAACTGCATACTGGTGGACCTTCGGGAATACGGCAAACCTACCCTTCGTTTTTACCTGACGGC
Marker8139	CCACTCTGGTGGTTCTCTTCCACTTCCTGACCAAGTACCGCATCCTGCAAGAACAGTAAAGGGAGAGAAATCTACTGCAGCTGTTAAG
Marker8141	AATTATTTTTNCCTAAATTTACATATAAAAAATACAATATTTGGACAAAGAATAGAATTGAAAATTAGGAAATGAACAGTAAAATCCA
Marker8164	AGCAGCTGCTGGATGAGATGGAGAACTTCTCCAAGCGGCAGTTCCAGGAGATGCAGCAGCGCCACGCCAACCAGGGCTTCCAACACTC
Marker8171	ATTGGCCAAGTATTGTATGCGGCGCCATCTCCTACGGCAATACAAATCTGGCGTCTGGAACTCACCAGGTGGTGGTAAGACAACCTTA
Marker8227	CCTGAAAGAGCGTGGTGGATCTTCCAGACAGGCCATTCTGAAGTACATAATGGCCAACTTTAAAGTGGGAAACGACGTCAACCCCATT
Marker8232	CCTGAAAGAGCGTGGTGGATCTTCCAGACAGGCCATTCTGAAGTACATAATGGCCAACTTTAAAGTGGGAAACGACGTCAACCCCATT
Marker8240	GCGGCCTTATATATCACGCGAGGGGGATTGAAGCGAACAGGTAAATTGCGGACGTCCTTGTAAACATTAAATTGGTCGGTTTGCCCGA
Marker8241	CCTGAAAGAGCGTGGTGGATCTTCCAGACAGGCCATTCTGAAGTACATAATGGCCAACTTTAAAGTGGGAAACGACGTCAACCCCATT
Marker8256	GCCCGCATTGTGTGCAGTAGCTTATAGTGCTAAAGACGTGCAAACACGTGTCATCATTGGTCTGCGGGTCCAAATAGACCATAGCCGG
Marker8291	CGACCGGAAGCTCTCTGGGTCACGTGACCGCAGTTGCGTAGCATCTAATTGGCTCACGCCTAGTACTACGTGATACGTAGAGGGATCC
Marker8292	AAAGTTTGGCAGCAATCAACAATCAATAAAATCCGAACGCCATTACGACGAAATAGATGTACAAAGTATTAGTCCTAAATCAGCGAAT
Marker8318	CTCTTGGTGGTTTCACTGCCAGTGCAGGGGATTTTCCTGGGCTTGGGCGAGGGGCAGGAGTAAAGGGGGTCGGCATCGGACGAGGAGT
Marker8335	CATAAGGCATAGACTATTGTAAACACCCATCTCTGTGTTGATAAGGCATACATGTTTTAAAAGACATATCTGATTTGGATAAGGAAAA
Marker8422	ATCGTCTGCCTCAGATGTCCTTTTATACAGCTTAAATTGTCTTTAAACGATAGAGAGCTCCACAATTATAAAAAGGCAAAGGCGAAAG
Marker8423	TGCACAGGCTGTTGAAAATAAATTCTAAAAAGTTCATCGTCTGCCTCAGATGTCCTTTTATACAGCTAAAATTGTTCTTAAACGATAG
Marker8424	ATCGTCTGCCTCAGATGTCCTTTTATACAGCTTAAATTGTCTTTAAACGATAGAGAGCTCCACAATTATAAAAAGGCAAAGGCGAAAG
Marker8425	TGCGCAGGCTGTTGAAAATAAATTCTAAAAAGTTCATCGTCTGCCTCAAATGTCCTTTTATACAGCTAAAATTGTCTTTAAACGATAG
Marker8476	TGGAGGTGGATGCCGAACACCTGACCACGGGAATGCTGGAACAACTCATCAAGTACTTACCCGAGCCCGAGCATATTAAGGAGCTGGG
Marker8479	ACAAAACGAGATGATTATGGTACTGACAGTGTACGGCGCCCACGTTATGCCAAACACGACTACCAGCATTGCCAGAAACCGTGCCGCT
Marker8508	ACCTCTCTCACACAAACTATCTCCGCCGCGAGCCCATACTAGCCCAGGACCCACCCCAGGGACAATCAGCCTGACCCACGGGATGATT
Marker8509	TTGTTATTTTTTTAATTTTGATTTTATGCACAGATATAGGTCACGTGATTGCCATTGATATAAAAATAGTAACCGTAGGATTAATAAT
Marker8556	TTAAACAAACACATTAGATCGATGAACTATAGAGACCTCCGAGCAGGAAAAGGAAGATATAGATATATAGACAGACATATAGTTGCAT
Marker8580	TGACGCATGCGCTGGTCCTCGGTGACATAGCCCAACTGGTTCCTCAGCCAGAGTTTGTGGATGATCCTTACATACGCCACCCCTATGA
Marker8581	TGGCGGTCATTCCTCAGAGGGGTGTAATGTTCAGTCTCAGCACAGTCCCCTACAATCTCCTTACGGCCCGGTGCGCCCTGCCAGGGTG
Marker8584	CCCAAACCCCTAGAGGATCCCCCCACCGTGACCCCATCAGCATCTGACCAGACCTCAGACACCGCTGCGGTGGATTATGCCAGTAACC
Marker8595	TACGTAAGAGTTATCTATCTTTACCAACATTGAACATTTTTGCTAATTTTGTGCTAAATAATCAATATAAAGTCAACTTTTTGTTATT
Marker8607	AAAAAGAGAAAATTAGAATTATTCGATGGATCAACACATAAATATTGAGTTTCCTTTCCGCTAACCATGGCCACGCGAGCGCGGGGGA
Marker8624	GTGAGAAACCATTGTTTCAACACGATACCAAGTAGACATTCTTCAAGTGATTTGCCTTTACTTTACGAGAGCAAGCATTTCTTGCAAC
Marker8681	ACGCTATTCCTATATAAAAGCAGTAAAATTTTCTTAAAATTTTTTTAAAAAGACATTCAGTATAACAAAATAAATAGTGCCTGTTTGG
Marker8710	ATTTGGTTTTATATCCATTATAAACGCATTAAAGGTATCTTGAAATGGTATGTTATCCCCCCCCCCATAAGGGAAACACCAAACAGGC
Marker8736	TCCTCCTGAACGTTTATCGTTGGCCCATTGGCCAGACCCTGATTTTGTGCCCTATTTGCTAATACTGAGGAACTGTAGGTTGACCCGT
Marker8738	GCTGACAGCCCCACTGTGGAGGTCTTGTGGAGGGACAGGAACCGCCCACCTGTCATAGATGGACCGGTCACCCCCCAGGTTCCACCTC
Marker8748	TCTTTTTGTTTAAAAGTCCACAGGGAGAGTTTCTGTCTGGCCCTAGGAATGGGAGATGTTTTACTATAACATGTCTATTAGCCATCTT
Marker8772	CCGATGACCAATCCCCCTAATCCATGTCTGGACGAGTAATCTGTGTCGCCCGGTGACCTGTTCCGGTCTGTGTAGGATCCCCGCGTTC
Marker8795	AAATCCATAAAAGTTGTAGGACGTGGACAGGAATGCGTTCAGCAGGAACAGCTGCCCGATGGCGTTCGCTACGTATAGGACTTTGACG
Marker8801	CCATCGAGTGCTGGTGTCCAGCGCAGTTTACGGGGTCGTATGTATCGTATACAAAATCCTACTGCTGGATTAAAAACACGTACTATGT
Marker8811	CTGAAACATTGCATCATGAAAAAGCCCTTACCAAGAAGATTTTTGGCCGTGGTCCGACCTTGGGCTTTGTCCCGCCGTGGAGCCAAGG
Marker8825	CCCAGCCACTGGAGGAACCGCCGGAAAATTCCACTTCTCCTTCGAGACTTGCCGCTCTCCATCAGTGTCCAGTGTCTCCCACGATCAA
Marker8826	ATTTTTAGTCTCTAGTTTCTTTGTAAATCCAATTCTTGTTCTTTATGTACAGGTTGGAGCGATGAAAGAGGTCCAGGTGTCTGTTGTA
Marker8849	GATCGGCTTCAGATATCCTCTTAGAAATGAAAAATATTACATTTAATGACTTTGTTTGAATACACGTGTATAAAGATATATACGCATT
Marker8852	GGCACCCAAACCTGTAGACCAAAGCAGTCCAAACAAGAGAAGAAACGAAAACAAGAACAAACCTATGAAAAAACCAAAGGCGGCCCGA
Marker8854	AAAATGGTCATACATTTAATGACCAGAAAATACAATCAAAAGATTATTTGTTGAAGATCACAGAGCTTGCTTTTCCTGCGACACGATG
Marker8945	GATCGGCTTCAAATATCCTCTTAGAACTGAAAAAAATACATTTAATGACTTTGTTTGAATACACGTGTATAAAGATATATACGCATTT
Marker8981	CTGGGTGTCCATCCTACGCCGCCTCTCCTGGGACCATTCTCCTGGGGGTGACCGTGGTCTCCTTGGGGGGGACCGCCAGCGCTTGGGG
Marker9069	CACTTCAGATCTGGACGAGTGTACTCTGAAGAGTGACGACTGCCAACAGATCTGTGTGGACACCCTGGGCAGCTTCTTCTGTCAGTGT
Marker9076	TTTGGGTTTGCAGCTACATAAATAAACACATGTGTGCATTAAAGCAATGCGCAAATTTTGTGTATTGGATAACGGTAGACCGCTCGCT
Marker9096	CAGATAGGGCCATGCAGTTCACTATCGCATCATCGCACCATCGACTTATGGGCCGATAGTGCGATGACGCGATAATGCGATGACGATG
Marker9105	TGAATACTACAATTGTAGATATGCTTTCTTATTGTGGTTTCATTAAAAATTACTTACTTTTGCCCAATATCTGAATATTACAGCAAGC
Marker9125	ATGCCATATGGGGACTTGCATGAGTATCTGCTTACTCACTCACCAAATTCTGATATGTCAAGTGTGGATGAAGAAAGCGGCAAGAAGA
Marker9130	AAAATCCACTGATATTCCCAAAAATTGACTGACATTGTCTGACATCCACTGTACATTGACTGTACCTCACTGTACATTTCACTGACTT
Marker9150	CGCGCGTTACTTACATTAAAAGGTCTTTCAGTGGTGGGGGGCTCATATGTATGTGCCATTCTCCCCCCTCCTTCACCCCCAAAATGAC
Marker9159	TGTCAGGATGATCTGCCTGCTGCACTGTGTAGAAATGCTGTATGGAGAAGGAACCCCCAGCTGACTGTACAGGAGGGGATGGACCTGG
Marker9174	CTCGGCCAGCCCCACTTCATCCAGCACCACCACAGACACAAATCTGTTGAGGTCCTTGTCCTTCTGGTACATGGCACACTGGCGGAAA
Marker9196	CAGATTTCATTTGGATAGCAGTGACGGCCGTTGTAGGGTGTATCGTCGCGTTGGGGAGCGTTACCAGGACGCTTGTGTTGTGCAACGT
Marker9259	GTCTCCAAGTTCCGGAAGTTGCAATGGAGCAAATCCTGGAAATGCCGGTGACAACGTTAACGAACTTGTTGCGTTTTGTCTTGTTTGA
Marker9269	AGAGAGATAACAAAATATGCTCTATTAATTTTAATACTGATGTATCACCAATGCATCCATGCTCTCTTACTCTGTAGGCAGAGTGGAC
Marker9494	TGGTGATGTAGGACTTCCGGGTGCAAGAGGTCCTCCGGGGGAAGCTGGTAAAGACGGGGATGACGGTAAACCTGGATACAGGGGGCCC
Marker9551	ATTCTTCTAATATTTAATGATATTATTTTGTTGTAGAACAAATGCCTACCCCCTCTGGCAGTTCCTGCTGGAACCTCCTCCAATTCGC
Marker9558	TGCGTGACATTTTGTTAACATTACCGGCTATTGAAAATGTATTAGTGGACTATACCCATATAGCATGTTTATTGAAAAAAGAACATTT
Marker9591	CCACACCGAGCGGCCACAGCATTGGGTCGCCTCGGGGCCTGTCGGATTACCTGCCCTTGACTGTTTCTTGGACGGAGACCCTTTTTGG
Marker9602	CTATCCTATCGTTTATCTTGTAAAACATAACGTTGCAGGTACTGCATAAAGACCCCCGGGACTTTACTCTTTTTTAAAATTAGATTAT
Marker9607	GTCTTTTGTCGATGAAATTATACTTGGAATATTTGTAAGGAGCGTCACTATCCAGATTGTAATGCAGGCAGCATATGTTCGATTGACG
Marker9616	AACGGGACCACCAAATAACAATGGGCGTGGGAACGCCATCCCAGCAACAGCCGGGATAACTTCCAGGGAACCAAGTCCCACCTGCGGT
Marker9681	ACTCTGTTATCCTAGAGAATGAAACACAATTTATATAGCACCATTAATAAGTTAATTACACATGAAGGCTGTCAAGCCTGTCATTATT
Marker9684	CACCAGACAATTCTTGCTCCAGGCCTTACTGAAATCTCTTGACCAGCCGGCACCAAACTTGGCCCACCTACTGCTGGGGTTTGACATC
Marker9711	CATCTACGTCCATTGATAGGTCTTGGAAAATTAGCAAATGCTAGTACTTTTTACATAGTCATCTACATCCAGTTTGATAATTATTACA
Marker9745	CAACGTCCACCGTTTTCTTTCCAAACACAACACCCGCCGGCCAGCACGTTAGAGCGCCGATCAAAATGGCGCCAATGCAAAGCCGTTT
Marker9769	ATTTTTTTTCTTATCGTTTGTTAAAATATTCAAAACTGAATATAGTTAGAAATCGTGCTTTTGTAAACTTGTAATATAACATCATATA
Marker9811	TGTATACGTTGTACATACACAAAACTGTACAGCAGGTGTGCAATGTAAATGGTTAGGGTGGATGTTGATTTATTTTTTTAAAAAGCAT
Marker9838	ATGGAGAACATTTTATAAAACAACACTGGTTTTGATTTGCAGGTTGCTTCATTGATGGTCTGTACCTGGAGGGAGCTGCCTGGGACCG
Marker9853	TTTTCTGCTTGTAAGTCCAACTCCTCTACCAAAGTGCTAGCAACCTTTTCAGAGGATCGACAGGATGTGACACATCTCAATCGTCGTT
Marker9859	AATTTTCTTATCCCACCTCTCTCTCTCCTGGACTGGCTTCGTCTTCTCTACCATAGCCACCCCATCAACGAGCGCAGTACCGCTGGGG
Marker9882	AGTAAGACTAGTAACAACCCATCTGTGGTTCACCAGGGGGTCTTCTCCACCGCCAGCTACGCCACCCACAAAATCCGCTTCAAGGACG
Marker10052	AACTATGACTTGGCCAAGGTGATCACGATGATTGGTAGCAGTGGGAACAACAGTATGCAAGGTGAGATATAGCCCAGGTGTGCTGCTA
Marker10155	CACACACTTCACATTTCTCCTCTACCTCGGTCTGGTCCTGTCGGGACTTGGGCTGGCGATTAAAGAAGCTCCGACGTAATAGGGAAGG
Marker10276	AGCATCCGGTTGGCAATAGGGACAATGGACAGGAGGTACAACAGCCCCACCCCAATTACAGTTAGAAGGCCCCGGTGTTTGGAATGGG
Marker10277	CATACAGACCAATACAAGCAAAGTCTATCATAAACATACAACAATTGACCTCCTTTGATTTGTGTGAGAACATGTGGGCAACACTGCT
Marker10278	CAAACCCGGTGCATGATCGGAACATTGGACAGGATGTAAATTAAGCCTAATCCGGACACTATCAGCGCCGTCCGTCGTTTCGAATTGA
Marker10279	AAGGAAATATTGGTCCAGTGAATAATAATAGTGCGTTAATATCGTGCCGTAACCATAGAGACCAATGCATGCAAAGTCGGCCATAAAC
Marker10281	AAAGGATTGAGACTTACATTGAGGATAAGCTGGACCATGTCCACGGCCTGGCAGTGACAAGCCATGTGTAATGGCGTCCAGCCATCCA
Marker10287	TTATGGTTAAATGAAGCATCTACTGTTAGCAACTATCTTTGATTACAAATACACAGTGTTAGCATTCTAAATTCTATACGTAGCCCTG
Marker10306	AGATACCGTGGTTTTATCAATATTCATGGGCATAATTTTTTCATGGATTTAAGGAAATTCACAGTTTTAAGGACAGTAAATTTGTGGA
Marker10311	GTTCATAAAAAGAAGTATGTCTAAGAGGAAGGAAGTATGTTTAAAAAAAAAACCCAAGGAAATATGTCATGTAAGCAAGAAGCTGTAT
Marker10335	TGTTTAAGCACCTGGCAAGCACTGGCAGCCTCACACTGACTGTCCACAGACTTGCAGAGACTGGTCACTTTGCTGAGGGCCACTAGTC
Marker10345	CTCGAAGATATCCAGAAGTTTGACGATGTTAGGATGGTTCAACAGTGGCCATATTTTGATTTCTCTGGGCAGGAACCGCTGTTGAAAA
Marker10350	AACTTCCTAATGTTTATTGTGTTCTTCACGATCTTCATCTTGTCTGACATGATGCTGGAGCCGAGTTGTTGGAGACTGGAGATCACCG
Marker10369	TACAGCGAACCGTACGCGCATAATTTTCGCGCATGTAACATTTTTTAATGTTACCCGTTGCCAAGTGCGTTGCTAATGCTGAGGGTAA
Marker10372	AGGAATTAAGTTCTTCACAATAATGTATGAGGGTGAAGAAAAATATTTTCTACTGTTTTCATTATTTAGCTATATTGGCCCCTCCCTC
Marker10430	AAAACAGGCTCGGCCCAAGGAGAAGCCTTTGACTATGAAACAGCGGTGCAGACGTGTTACTTGGATGGAGAACTGGTCAATAGAGACC
Marker10467	GTGTTGTCATTTTGTCTGTCATTTATCTGATCTGGCTAGGATAAAGATATCTGTTTTGTTTAATAATTCAACAGAAGCACATAGTACA
Marker10542	TTAATTCCCGAAAGCTTCATCCTCATTTTCCCTTTGGCATTTTTAATTTTTAACTTCTCGCTCTGCAACAAGCTGTTTTCGTTCGGCG
Marker10575	AGCTCGTCGGAGGGCAGTTGCGGTGTGACTCGCAGGGGGCCGTTCGCGGTCAACGCTTGTCGCTGCTGCGATCTCGTTCGACGACGTG
Marker10627	TTATCATTGTCCACAACAACCTTATGATATATTTCACGAGTATGGAGGACTACCTTTCTCCCAACCACACAGAACTGTAGAGCATTGT
Marker10629	TCAGTTCAGCATGGTCACAATGCAGAGTATGGAGCCGTTCAACATGGCCAGCAAAATGGAGCAGCAATGTGGGTCAAGGTCGTCCTCT
Marker10645	AATAATTTATCAGGATTATTTGTTTTTATATCAAATAGTCTGTATTAATTTTGAGACACACTGTATATTCGGAAAAAACTCGGTACGA
Marker10651	GTTTGATTGTTTTTTCCAACACACAGTAGGTTCCTCAATAAAGAGAACCCGCCATTGTCCTTGTCCTCACCGCTAGGAGTATTATTTT
Marker10696	ATATTCGCTTCGACTGGACATGTTTTCGGCAAGGTATTTATCCAGGAAAGAGAACACACAGTCCACGTGGGAACCATCATGTGACCGC
Marker10707	TTGTCCCGCTCTCAGAAACAGGTGTCCGAGAAAATTGAAAAACTCTTCTAACACTTCAGAGCCCTCGAGAAGCACGTCATCGCGGAAC
Marker10711	AAAATTTTTTTCTATTGTGTAACAGGATGTTGGAGGCGGCGGACCCGCTCGCTCTTACCCCATTGGAGGCCTCTGTTACTACCTGTCT
Marker10724	GTTTTCAGACAGCAAGTTTGACTGCCCGTAGCATTCCAGGGCTTCGACCAATTAGTCCAAGAACTGTGCGTAATCGTCTGCGCGAGCA
Marker10740	AGGTTGTCTAGCGCCTTCTGAACGTGTGGGTTATCGAAGTTGATCAATGAGGACATTCCTGGCTGGCCACCTCCTAGGGGGGCCCCAT
Marker10748	ACTAATTATAGTACATAACATGCAGTACATTTCATCAATTGGTTATATTATTTTTACGCGCAGTGAGTTGGCGCTGCCTGTGGCGCTG
Marker10770	ATGCCATTTGGTTCTGATGTTTTACATCTTTTCTATGTTTTCTAACAACTAATAACGGATCTTTTTTGTAGACCTGACTACTTAGAGT
Marker10771	CATCTACGTTCATTGATATGTTTTGAAATATTAGTAAATGCTACTTTTTACATAGTCATCTACATCCAGTTTGATAATTATTACATCG
Marker10780	AATGGAAGTATCACATCGTTTTCAGGATCAGAGGCGAATAATCGGATCCAGAATACAGGGAACCACAGTGATGGACGATCCCATCTCA
Marker10783	ATGGTTGACTTGTCTGGGGTCTCCTCCGTGATGACGAAGATCCCCACACTGCGATTGGTCGATACGACCTCGCCACGACGTAACCACA
Marker10790	CAACTGCTCTTCTCCCAGATGCCTCAGTCACTCCAGCACAGGATTTAAGTCTATAAGGGATAGGGTCAGATGTGACCCCAAGTTGGTT
Marker10804	AGAAATTGTCAATTATCTTTAAATTATTGATGTTTGATGATCCTATCTCTATTTAATCTTTATTAAGTCTTCCGAATGAAATTTGGAG
Marker10830	ATTATTTGATTAATTACTGGTAAAGAATAAGATTAGTTTAATGTCATTGTCCATTTAGTTTGTTAATATATTTGATATTTTTTTTNCA
Marker10845	GATCGGCTTCAGATATCCTCTTAGAACTGAAAAACAATACATTTAATTAATGATTTTGTTTGAATACACGTGTATAAAGATATATACG
Marker11028	AGCGCTTTGGAGCAATCCTGGACAGCGCCGCTCCTGCCACGAACAAGATTGGTTCCCGCCAAAAAATCGGCCTCTGACCGCACCGTTA
Marker11032	TTGGGATAGCGAGTGTCACGACACCCAGCTCGGGGCCCTGGGTAACGGTCACTCGGTACAGCCAATGGTTGTGTCCCGACCCCTCAGT
Marker11105	TGAAGGAGCCATAGAAACCACGCGCAGATCTGTGGCTGTCTGAGTGAAACTCCACCAGGATAATGTTGGCGGTGGAAATGATGTGTGT
Marker11127	GGAAAAGTGGCTACATATATTGTGAAATGTTTGCAAGTGTCCAAAGACATGGAGTTGTTTCCCTCTCACGGTATTTGGGGCCCAGAGC
Marker11157	CCCGTCTCCTCCTCCTCATCCAGACTTATCACCTCATCGGGGCCCCCGCTCAGTTTGGGAACCGCCGACAGTTGGGGCAAGTCTGGCT
Marker11165	TTCGTTATTAGTACAGAATTATGATTTACCAATATATATAGAAGTGGTATTCTTTTTCCAGGGAGAAGCTGACCAGGATGGCTCCAGT
Marker11231	TTTATCATAATAAATTTTGTAAACATCAGCTACAAGAAATTATGAATTTAATCTTTGATGTGTGTTCACAGTTGGAAGAACTCATCCG
Marker11324	TTCTGACGATGGAGGGGAGTAAAGTCCCCGACATTTGGCGACCAACCGCACACCGCGAGGGTATATCAAAATGTAACTTTTTTTCCGC
Marker11410	TGTGGGGATATGATTGGTTTCCGAGCGGTTTCCGCCGGCCATCTGCCCACTCCGACTGACGAGGATTTTCACGTTGATGACGATTTAT
Marker11414	ATTCTGTCGATCTCCAGACTACAAGAGAGCGACGTGGGTAACTATACCTGTGTGGTACGCAACGAGTACGGGTCAGACCGCGGGAGGA
Marker11445	CAGTCAGCAAATCACCACCACAGCACCACCAGGCCATCCAGTGCACTTCATGTCAAGGTGGGATCTGATTGGCTAGCTGGAGGTCGGG
Marker11454	ATCAACAAAAGACGAGCACCCTAATAGCACATACAAGGTTAGGGTCTCTCTCCTTCTCGCTTACTTTTAATACCTAATCATCTTTTGT
Marker11483	CGGCAATCCGATTGATTTCGTTTGCCACCTTCAGTAAGATCTCGGTGACGTGGATCTCGCGATAATGAATACGTCGTCTGCGTCCTTC
Marker11494	CATATTCACTCCATGGTCCTTATGTTTGATATCGGAACTATTTGACAAAGATGCACAAACTTTTATTTTTTGATTTTCACTCAGCACT
Marker11520	AAGATGCATCGCACAAAATTCCAAGGCATTTAATCAATCACAAAAATTGTTATATTTATTGTTCAATTTAGTGTATATCGAGTTTCAC
Marker11522	TCACCACAGACCAACTCGTCGGATCCATCGCCGCAATCGTCGTGTCCGTTACAGACCTTGGAGTAGGCAATGCAGTGTGTGTCCCGGC
Marker11530	ATTGCAGCCTTTGGAAGAACGACACACACAGAACCCAAGGACATGAGAGCCAGACAGCACAGTCGACAGAGGATGAATGACCAGATCC
Marker11560	AGTGGTTGTGGCTTCACAGGAAGCCAGGGTATGGAGATAGCCAGGGGCTGTAGGGCCGGGGACAGGAGGGGCAAGAAATCCCTCCTGA
Marker11569	CATTGTAAATGACACCAAGCTCTACCTGTATTCCAGGCTGACAGGAAAAGAATGCTCGCAGTGTGTCCACATTACTCCGGATCTTGAC
Marker11573	CTATTTACTGGTGATAATGATAATATCTTGGCTCTATAAATTTGTGTAGTATGAGAATTATTGAACATTGGAGATACATTTCTTGTCT
Marker11579	TCCTACCGGGTCCAGCAGGATAGTCTGAAAGGTCCGGAAGTCGGTGGAGTGGATGTCCTTATGCTCCGGACAGACGTCCTCTACGTCA
Marker11594	ATAGCAGTGGCCCGTGTGGGTCTTCAGGGTGGCGTTCCGTTGTTGGAGTTCCGTCGGACACCCCTGAATATCGTCTCCATCTGTTTTC
Marker11610	TACACTACCTGAGGATGCTTCCACATAAGTTTCAGCTTTCCTGGCTGATTAGTTTCTGAGAGGAAGATTTTAACAGATTTACTCTATA
Marker11625	GACAGGTAGGTCGAAGGACAATTTTACAAAAAAGTCGATGGACAACGCCACACATAGGACCCAGTCCGTTCTACAGGACGGGTACGAC
Marker11659	ATACACACGGAAATCCCAAGCTTCCTAATTGGGCTGATCGGGATCGACAACCTCCCTAACGGCCTGTCGGTGGCCTACCTACAGCAGG
Marker11710	CGAGGCAGCTAGAGCGGAACGATTACGTCAGCGTCAGCAGGAGGAACTGAGGGCTGCTGCGAGACTTCAGGAGATGATGCGGCAACAG
Marker11719	AAGTCTAGTGAGATCGTCCGACATTGATAAATTGCATTGTGGGTCGAAATTTACTGACGCCGAAAAATTCTGTGGGATCAATGTGCAA
Marker11749	CTTTCCACCCAAGCATTCTCAATTATTCAATATCCTATGAGCATGAAAAAGATTTCATTTTGAAAAACATCAACAAAGCCGGGACATT
Marker11756	AATATGTTTTCTTGATCGGTGTCATTTGGAACTTGTTCGCTGCCATCACGTGCAGAGAAAGCCCCTACTGGGGTGGGCGGGGGTTGAT
Marker11758	ACAAGGACCTACACTTGACAATAAATCAAACTACAGACAAAGCCCTAGTAAACAAAAGCACTCACCGACAAAGTCCTATAAACATTCA
Marker11793	ATTAAGGAAGAATGAAGCAAATGTTGGCGTGACCACGTCTGCGAGGGGTGATGTAAAGGATGGCAGTGACGTAAAACAGGTACCTGTC
Marker11799	CTCTTACAATGAAATAATCTGCTGTGATGGTAGTATAATCTGTTGTTAAATCTTCGTAATGAAAGAAGGCCAAAGCCAACACACAGAA
Marker11871	GCACACCCATTTTGTTAGGGATTATAACTAGCTTTAATATTGAAAACATCATTTGCTCGACATAGAAAATACCATTTCTATACGTAAT
Marker11879	GGCTGTTTTAATTCTCAATATTCAATTATATTTTCAAAATCAGTTGTAGCAGTATAGTTGTATCTTTAGCTCTAATGGAAAATTCGGA
Marker11928	CCCTTTTATACACATACATGTATAAATGAAGGGCCAAGTTATTTCTCTTTTTGTCTGTTACAGTTATTATTATATTTTTTAAGAATGT
Marker11939	ATTCGGAGATCAAAACTACAAACTCGTCAAACACTATAATTGTAACTTAATAAACTCATGGATTATCCTTAGAAAAAAATCTAATTAT
Marker11955	CAGTTGTGTAGAATATGATAACCCCCACGCCATATTGTTTTCTAATTGGCAACAGTGAATTGGGTTGCCACAATTGCTCGAGGGCGAC
Marker11961	ATTTTCAATTGGTCTTTTCAGAAACCATTTGCAATGATTTATTTCAGTGAGCAAATTTTCCTTTATATACAGAGATCAAGTATTTGAA
Marker11963	ATTATGTGCAGGATGATTTATATCTAACATAACCAAATTTGGTTTATCGGGATGAAATTTCAGAAATTAAACAAAAAAATTCTTTAAA
Marker11964	AAAAGTATCAAATCATAAAAACAAATGGCTGCTGGAATGACAGATACATACAGGTATTTGTGGGGGTGGTTCATCGGAGACGGGATGT
Marker11970	AAATTGCACTTGTATTTAAAAATAATTGCACATTAAATGTTTGGATCACACATATATTCAGCTAACTGACAGCGATAATTATAATACT
Marker11974	ATGTGCTGTTTACCCACCGATGTTTGACACGCCGCCGGACCCTTTCTCCCCGTTTCGTCCCCCACTGATCTCTGTACCATTCTGCACC
Marker11988	TGGGAGTTCCACAGTGTTTCGGAAAAGTCCCAGCACCTCGTCCTCCTCTTTACCGTTACTGTAGGTCGGAAAACTGAGGAGGTTGTTC
Marker11996	AAGAAATAAACAATATCAAAATTTCTCTGTTTACCCATCTAACAATGGCATGGTGGACGGAACGACATCGGTGTACAGGACGACATTT
Marker12021	CGCACGAACCTGAACTCAAAATGACTGGCCTCCAGACCCTCAGTGTGGCCTCCATACTCCAACGAAAGCAGACCATTGTGATGCAGAG
Marker12037	CTCCGTGTCCCGCTCCCAGCCCGTTCCCTGCTGGATCCACCCCCGGGTTTACCACGGACTGAGTGTCTCCTCTAGCTGTGGTGTCTAG
Marker12045	TGAATTGTTTTGATTGACAGGAGGCTGTGATAGCTCCACCCACACCTGTACCTGTCGCCCGGGCTGGTATAACAATGGATGTGAGTAT
Marker12068	GTCAGAATTTCTGGAAAGCAACGAGAACCAGCCGATTGAAGCGGATGAAGGTTAAACTACATCGCAAAGTCCTTGGATGGTCACAAAA
Marker12070	AGAGCAGTCCTTTGCGTCCAAAAACTGGGACAATCAGAACATGTGGGCGAGTTTGACTAACACTCCGACCATGGGTCGTAAAGTCAAA
Marker12071	CCAACAACTGTGACCAGGGAGCGGGCTATGGCTGTGAGAGCTACCACTACAACCCCGTCATCACCAAAACCGAGGTCATTTACATCGT
Marker12108	ATCATTGTTCCAGGTGAAAGCCCCAGCCAAGGCAGGTGCCCTTGCTCCCTTGGATGTCCATGTGCCTGCTCAGGCCACCACTTTGGGT
Marker12291	CTTGCTATTGAGAGCAAGTTGCCATCAAACAGCTGTCCCAGTTTCCCTCCATTTTAGTCACCAGGGTCCCCCATCTGTCACTACAACT
Marker12293	TATCAACACTGTAGTTATCATTTTCGCATAAAAACTTGTGAAACACTTGATAGCTTATTAGAACCACTTTAAACTGTTGAGTGCAGCG
Marker12313	CCAGCATTATGGCTTCACCAGGCATATTAACCGATGCCTGCAACCTGCTGCCATCTGCCACGACACCGTGGGGTCTCAACTGTTCGGA
Marker12401	AAAATCCACTGATATTCCCAAAAATTGACTGACATTGTCTGACATCCACTGTACATTGACTGTACCTCACTGTACATTTCACTGACTT
Marker12404	GAAGTTGTGGGCGCCCAGTGCTTTGTTTCCAAGATCTCAATTCTCCACACAAGATGTCCTTGGGAATACGTTCGTCATCAATTCGACG
Marker12405	AGCGAGACCATCCAGACAGCCGCTATATCTGGTAACGCAAGAGGCATGTACGATGGTATTAAAAGAGCCATAGGACCAACTTAGTGCA
Marker12430	TACACTATCTGAGGATGCTTCCACACATTTTCAGCTTTCCTGGCTAATTAGTTTCTGAGAAGAAGATTTTTAAAGATTTACTCTATAT
Marker12435	CTTGACCTCCTTTTCATCGGGGATGGCCTGTAGTGACCGACGACGGGGGCGCTGTTCGGGCGGCTTCAGAAAATTCATCTTCTCTCAA
Marker12438	ATTTGTTTGTTAGAAATGATAAAAGGAATGGTACAGGAAAAGGAATGGTACAAGTAACGCACAGTATACTGACTACATACTGACCTCG
Marker12495	TAAAGAAGGTGTAGCATTAAGACCCATAATTTGTTTGAATATTCCCGCTGCATCTCCAGCGATGGCTTGAGTGAGGCTGTCATTTGGA
Marker12525	ACCAAAGAAAGCATTTTAATGTTAAAATGTCAAAAATAGATAACTGTTAAGAACAATGAAAGTATTTCAACAAACTGTAATGTTCATA
Marker12526	CTCGGCAACAGTAATCCTGATCAAGGTCGGGCAAATAAAAATGTTTATCATGGAAACGCAAATACTAACAATTGAAATAATATGATTA
Marker12570	ACGGGGCTGGACATCGATCACCTGATACAAGAGTACTGCGTGAAGTACGCGTCCACTGTAATCAGCCTGGGGCGACAGACACCGGGCT
Marker12589	AAAAAGACGGTAAATGACAAAACTTTAAAACACAAAGCAAACACTTAAATTTATCGAAATTTTAAGTATCTGCTTGAACACAATTGAA
Marker12591	ATTTGTATTTTTTTACAGCATGTAAAAAAATAAAATAAATTATTTAATTTCTCATATAACAAACATGACTTGGACAGTGTAATTCACG
Marker12644	CATCCGTGTCGCTGAGATCAGAGAAAGTGGACGCCTGAGATGCTCGGACGAGTTCCATCTCCTTACGCTCGAGCTCCGAGCGGAGTTT
Marker12655	AAAGTCTACACAGAGGTCTCATCCTCTCCGAGGGAGTACGGGAGACGTGGGGAAGGGCAGTGGTCACCCACGGCAACACTCCGGGTCA
Marker12660	ACTGAAAACCAGGAACTTAGAACAAAAGTTGGCATCCTATCAATCGAAAATGACACGCTGAAACAATCGCAGGAGAGCTTCGAGAGAG
Marker12661	AGAGGTCACATGGCCCAGCGAGGGCAGTTCAGAGGTCAAAACAGAGGCCACACAGCCCAGGGAGGACAGTTCAGAGGTCAAATCAGAA
Marker12662	TCTGGTGTCCCAGCTCAACGGCCTACAACAAGAGTGCCAGTGTTACCGCGTCCAGAACGACGAGCTCAAAAACAAAATCAACGTCCAG
Marker12663	TACAGCGAACCGTACGCGCATAATTTTCGCGCATGTAACATTTTTTAATGTTACCCGTTGCCAAGTGCGTTGCTAATGCTGAGGGTAA
Marker12665	ACCTTTGCAACATGCATGCATATATACGTGTTATATACGTGTACATTGTTACTTTCGCTGAATATCTACTGAAATAAATATTTTATAT
Marker12744	TGACCGAGGCAGTGTGAGAAGTCACAGGAGTGGACGATCTGGGCACGGTCGATCAGGACGAGAAAGAACAAGGTCTTCTCGCTCTAAA
Marker12745	AATTAGCTCATTAAAATTAAAATGAAATTGAGGTAATTTGCCCAGTGTTCAGAATGAAAGTAACTGAAGTTAGCATCTACAAAATACT
Marker12828	ACATGATAGGTTGTACTGGCGTACTTGGAGCGCCTTAGTTCTGCAGCGCTAGGAAGTTGTGCGGGATCATCGCGGCGCATGCAGAGTG
Marker12859	GATCAATATCTGTGTTGTTAATAAGAGTAATTTTTTAATGTAGCATACAAATCTACATATGAAATTACAGCAAAAAACCAAAACATTC
Marker12878	AGTTATCTAACTTCGCTAAGCCTACTAGCTTATCTCTCTGTTTCTCAAAATTTCAGTGATGATTGTTATTCTTTAGCTTGAGTGCACT
Marker12934	AACAGCATGTCATATATGAAGAAAGACATCGTAGACTTACCCGGAAACCCCCAACAGATGCAGTGAGCGGGCCATAGGATCAAAGAGG
Marker12944	ACACAAAGAACATGAAGCTTGCTGACGATGTAGATTTGGAGCAGGTGGCCCAGGAGACCCACGGGCACGTGGGAGCTGATTTAGCCGC
Marker12970	TGTTCTCTTCAAAACTGTTTTCAAAGATCTATGTATAAGTTAATGAAATTCACGAGGTAAGACCGGTAAAAGCATCTGCCGTCAGTTC
Marker12971	TAGAACGGATTATTTTTTCATAAATTTGTAAAATGAGATAAAATGGACGCCTTTTAAAAACACACAGGTGCGAAAGGAGAACCAGGAN
Marker12988	CAGCGGAACATGAATGACAAAGACCTCGACACTGTGCCCGACCAAACGGGGGGTGCGGACGATGTCTATAGATCGCAGCCGCCAGGAA
Marker13004	ATCGTTGAGATCGTTCAATAAATGCTGAATAAATGTAAAATTGCATATTGCGCTTGGTTTTACCTTACTGGTCATTGCGCGCCTCACC
Marker13022	ACATTCCATCAAGCTTTGACCTAACCCAGGCCATACCATGTCAAATAGGATGCCAAAGTTAACCTTCTTCTGTATGGTTATCACCATT
Marker13057	AAGTCTAGTGAGATCGTCCGACATTGATAAATTGCATTGTGGGTCGAAATTTACTGACGCCGAAAAATTCTGTGGGATCAATGTGCAA
Marker13132	GAACATCAATATTAGTGACTAACAGTCAGACTGTTGAACACATGCCTTTCACCATGCCCAATCTGTATACTGATACACACACATAGTG
Marker13140	TCACATAAAGGACATGTAGACATTCTTATTTCAAATCTTATTACTGGGTACTTTGATAAAAAATACTACAGAGCATGTCAGTGTAAAA
Marker13150	TTGGGAGTAGAACCTGGTAATTATAACGCTCATTACTGCCTTATCACAATGTAAGATAGCGTAAATACATAGTTCGAGAGTACTAGTA
Marker13153	AATCATAACATAGTTATCATGAATAAATACAGTATATGAAAAAAGATAATGTATAATATAACATCACAAACTAATGCATAGAATTTGC
Marker13183	ATGCATTAACATTTCCACAGATTACAATATGGTCCCACACAGTCATACTGATTGACAAGTATCTATGCACATAAAGAACCCCGCCCAC
Marker13197	AACATGCTTGTGTAGGTGTGTTATGTCGGCCACCTATCCCCTCACACTGTCACACTGCATTGCTCTAAAGGAGGAATTTAACATGTTT
Marker13273	CCTGTGGTGGCCAGGCAATGGCAACTTGTCCACTGGTCAGGGTGACCATCCCCCTCTGGTCCATTGCCTTCTGGGAAGGCAACCACGN
Marker13295	AACCTCAGAGCAGACCCCTAGACCAAGAGAGACAAATGCAGAGTGGAGTGGACCCAAAGTTAATGAATAAGATTTTAGACCAATACAC
Marker13297	CCGGAGGGATGAGGGACGGACGTCAAATCGTCATCAACGGGACGGTGCCCCACCACGAGCACAGGTATACACACACACACCTGTGTAA
Marker13357	CGCTTATTTTAAGTCTGTCACGCATCAGCCTTTAGCTGGGTCCCTGATAAAGTCACTTTCTCGCCAGGCTTGAAGGCTGGCATACCCA
Marker13371	GCCAAGTCCCATTCCTCTTACTGACATAAAGGGCAAAATGAATAAATAATTGTATAATACGGGGGCAAATATTTCTTCAATACGGTTT
Marker13383	GAATGTCGGTCAATGAGTACATCTAATATCGGATACAAGTCGAAACTCTTGGCGTTGTGGGCGATTAAAATCGTGTTCTTAACGTGTG
Marker13392	AAGTCTAGTGAGATCGTCCGACATTGATAAATTGCATTGTGGGTCGAAATTTACTGACGCCGAAAAATTCTGTGGGATCAATGTGCAA
Marker13405	AAAATGCTTTTTATAGGTTGATGAATGTTGAAGATGAGCTTCGCCATGACCAAGAAGAAATGCAGAGCATTGTGAAACAGAAGCAAAA
Marker13411	ATCACTGTTCACCAAGTTCTTGCCAATGATATCTTCGCTAATGGTGGAGGACCACACGCGGGTCCTGTCGGCCAAGCTACCCGAGGAG
Marker13458	TACACTACCTGAGGATGCTTTCACACAAGTGTCAGCTTTCCTGGCTGATTAGTTTCTGAGAAGAAGATTTTTAAAGATTTACTCTATA
Marker13557	ACAAAGACAAACGTCCGGATGTCCGGTAGTTGTTTCTACACCTACCTTTTACATCGTTGTTCCTCATGGGTGGACTTAACGAGAAACA
Marker13605	TTTGATACTGTGGATAACTTTTGACGACAATAACGATAATGTCTCATTACGTAAAGACTACCAAAACTTAAGTGAAAAGAAAAAGAAC
Marker13610	AGGCGTGTCCTCATAGGAACAGACGTCATCCACACAAGACTGGTAAAGATCACGTGCCTCTTCCTCATTAGCCTTTATACAGCTAGCG
Marker13614	CGTCCTTACAAAAGCATCCCTCTGTTGGCTCCAAAGTACAAGTGTCCTCAGCATTCGGGTCCAGACACGTTGCTGGGCAACCCGGACC
Marker13617	GTATTATCTGCAATAAACTTTGATTGTATAAGGGTTGACACCTCAATAGTTCGACCAGCATGCACATTACAATTGGGGTTACTATTAT
Marker13726	GTCCCTTACAGAGGTTCTGGCCAGAGAGTATAGCCAACATCCAGCCTCAGTTACCCTCGGGTCTACAGTCTGCGGTCAAGTCGGAGGC
Marker13729	TGAAGTATATATAGGATTACAATAGACTATTAAGTTCATTCTATTTTTATTCTATCATTCTATATTCATTGTTGGTTGAATATTTAGA
Marker13749	AATTATGATTTCATGGATAAAAGCAGGCATTGGCATGCACCCGGCAACATTCTTATTTTGCAATGCCTGGCTAATTTCAATTCTTAAA
Marker13760	AGGGAACGACTTCAGTACCAGGTCAAAGTCCTGAGCTCTGAGCTGGACCACTGCAACGATCACGATCTAGCCAACCTCAAGCTCAAAA
Marker13767	GAAATTGGAAGACTTGTTAAAAGTCAAACGAGAGCGTCCAAGGAAACCATCAATTGGCGAGCACCCTATCGCTTTGCAGTCTCTTTAT
Marker13780	AACGTTTTGTGGTTTGGTCATGAACATCAAAATTATAATTGATCTTCTTTAGTTTTAAAATAAAATTTGGGAGTTTCTCAGAAAATAT
Marker13790	CTCTTTCTAGAGGATATGCTTTTGTCACATTTTTCGATCCAAAACATGCAGAGGAGGCAGTTAAAGGATTAAACGGCACAGCCCTGCA
Marker13812	AATGAACACACATTATTTAAACTGTCTATGTGCAACTATTTGTCGGGGCGCCCCTGTGTGTAACCCCCGCGCGTGCGCCGAATGTAAA
Marker13839	ATTGCTTATAATTTTATTTGTTTACTCTTCATTGTAGATAAAAACGGTCATTTTCCTTTACAATGACGTAAAATTGTACAAAATTCAC
Marker13841	TACACTACCTAAGAATGCGTTCACACAAGTTTCAGCTTTCCTGGCTGATCAGTTTCTGAGAAGAAGATTTTTAAAGATTTACTCTATA
Marker13851	CCCTGTGTACCTCTGACAGATCAGCATGAGCCAGACCCACTATTGTAGCATTAATGGCCGACATCCACTCCTGCTTAGGCACGCCCTT
Marker13855	TTCTCCGGAAAATTGAAAATTCCGGATGAACAAGGAAATTTCTTGGACCCAAACAATGTGGTGACGGTTATCGGCGCCGCCGCCAGTG
Marker13883	AAATGTTAATGACAAGGGATTTAGCATATATTGGGCTTGAATTAATGGTTGCTAAAATGTCCGCAAAGAGCAACAGGGCACGTGACAG
Marker13904	AAAATCCACTGATATTCCCAAAAATTGACTGACATTGTCTGACATCTACTGTATAACCACTGTACCCTACTTTAAATCCACTGTACAC
Marker13973	ATTAATTATAGTACATAACATGCAGTACATTTCATCATTTGGTTATATTATTTTTACGCGCAGTGATTTCGCGCTGGCTGTGGCGCTG
Marker14031	ATGTTTCTACATTTAAGATGTCAATCAATACCTTGTTGAGGAAATCTCGGATTTTGTCAGCGTCCATTGCGTCGTAGATGTGCCACAG
Marker14053	AATAAAATGCAAATTAAAGTTATTGCCTGCACTTTAGGTCATTATGATTGCATATAATCACATGTCTTCTTTAGTTCTGCGTATGAAC
Marker14080	GCCTCCCTGCCACAACAGGACCCCGCCCTTATAAATGTGAAGTTTGTCAGCGATCGTTTAGGGAGGTAGCTACCCTGAGAAAACATGA
Marker14084	TTCACTTACCATTATGCTGACTTCATTATCTGCTTGGGCACCAGTTTAAGCCTGGTACTCCTCCCTAAAAGGTTCATAGTTAGGGATG
Marker14113	GATCGGCTTCAGATATCCTCTTAGAACTGAAAAACAATACATTTAATTAATGATTTTGTTTGAATACACGTGTATAAAGATATATACG
Marker14120	AATTATGATTTCATGGATAAAAGCAGGCATTGGCATGCACCCGGCAACATTCTTATTTTGCAATGCCTGGCTAATTTCAATTCTTAAA
Marker14196	TCCCCTTCCACAGAGCCCGTCTCCGGTCAACCGCCCGAGGACCTCCAACAACCATGACCCACACTACGGAGGGGCCAAGATCGCGGAC
Marker14201	TTGAAACAATAGCTCAATTAGAAAGTATGGTCCTCGGAGGAAGGTGGGGTGTCATAGTCCTCGAATGGTCGGTAATGCATGTATGTGT
Marker14237	GAACACTCCCTCCAACCAAACCTCCCGAGAATAATCACGTGACACATTCTCCTAATGAGAGAATAGTTCAACATGTCCACGCGGAAAC
Marker14251	AAATTTTATTAACTTGTTCAATGGTTTACAATGATTTGATTTGTGAATGATGTGGCCTCAGATGTCGATACATTTGCAGACGTTGTCG
Marker14253	GAGCCGACCTTTAACTTTTGGTTCTTCGGTAACATGACCGGTAAGTTTGCAGTCACTATTCTTTCTGTTCTTTGCCTTTACGTTTAAC
Marker14313	CTCAATCACAACTCCCTCTATTGCCTTTCGATAATACATATCGTCAAAACGCCGTTATTCACGTGTTTCAGTTCTCCCATCTTGTTTA
Marker14344	CTCTGTCCGAGCAGGGAGGAGATATCGATGGCTAACAGAGACTTTCCTTTCTGGGTTGCCTTCTCCTCTGCGTCTTCACTGCATCCAC
Marker14346	AAATTATTCCACAGTAATCAAGATCTCAATTTATAAGTTCTACTGGTATAAAAAAAATGTATACAGGTAATACAATGTAGTTGTTCAT
Marker14353	CCAAAAGTTAATTATAGAATTGAGGTAAGTTTAATTGAAATTACCAGATCCATGGACAGGATGCAAGACCTGAGTGAAGCTGAGGGTG
Marker14371	CAACTGCTCTTCTCCCAGATGCCTCAGTCACTCCAGCACAGGATTTAAGTCTATAAGGGATAGGGTCAGATGTGACCCCAAGTTGGTT
Marker14405	AATCAACCACATCAAAACAGAAATACAATTTTAACCACCTCTTTAGCAGAAACACCGCTTACCCACCACTTAAATGAAAAGAACTTTA
Marker14494	AATGTCAATTCATTTGTTAAAAACCCTTTAATTTTTTGTTTGCAGGAGAAATGATCGACAAACTGACCTTGACCTTCAACAGGACCCG
Marker14500	AAGTCTGACATCATCGTAATTATTTCGTGCAGTCTGTGATTTTTCTTAGATCGATGAAGGTGTCGACCAATCGATATACCGGTGTATT
Marker14539	GATCAAGCATGACCGGCTGGTTGGAGCGACGGAGAAGACGTCGTCTTTGGTCCTTTGACGTACTGACAATGGCTGACAATCTTTAAAT
Marker14634	CTTGGAAGACTTCTTATCCCGGTCTCCAGACTTTCTTCTCTCCCTGTCCACAGACTTCCTGGAAACATTGGAACTTTTCCGAGGCAGA
Marker14661	CCGCGTTTTGGATTAACGCTAGGGATAGAGAGACATCGCTGATTGGTAGGATCACTCTTTGCAGACGACAGACGTTTGAAAGCAATTT
Marker14792	CGTCAATGGGCGTGTCCCCAATTATACCTATCACCAACTCCTCAAGAGGCGTCAGATCAGCCGGCGGCGGTCCTCCTCCAGTCTTTTT
Marker14828	GTTTTCAGACAGCAAGTTTGACTGCCCGTAGCATTCCAGGGCTTCGACCAATTAGTCCAAGAACTGTGCGTAATCGTCTGCGCGAGCA
Marker14834	TGAACAGTACGGTGGATGTTTACCTGTCACAGTTGTCCCCCACCACCCCTCTGGTCCTACAGAAACACGCCCCCGACTTGTTGTCACA
Marker14835	AATTAATCTAAACAAAGTTTCACAGATACTCAGCTGATTGAATGGTGACAGGACGGTGCAGTTTTACGGGACGGTACGCGCACACGGG
Marker14883	TGATCACGTCATCCGGGACGTAAACACCATTACACCGTCACGCACCGCTGTCGGCTGGGTTGGATCAGTGTTTCCATCTGTTCTTTTC
Marker14911	TACACTACCTGAGGATGCTTCCACAGAAGTTTCAGCTTTCCTGGAGGATTAGTTTCTGAAAAAAGGATTTTTAAAAAAAGATTTACTC
Marker14918	CCCGCACACGGCGAGACTGTACTTGCGGATGTGACTGTCTCTACACGCCGTGTACACGTCACTTCCGTCACACTTCACTGCGTACACG
Marker14928	TTACCACACATTGTGCTATCCTCATCCGACCTATCGGTACAGTCGGGCACCCCGTCACAGCGACGCCTGACATCCACACATTGACCAC
Marker14936	TTTGTTGAGCTGAGAAAATTACGGCGATCTGATTTCAATTACTTTCTTAAATTTTGATTTGTTTCTTCATATAACAAAACAAATACTG
Marker14956	AATAGTCACCGGCGGCAGAGGGCCCGGGCCGTACGAGAACACCGCCACATTGGACCATAGAGACATTGCTAGGCGTGCTCAGCAGGAA
Marker14975	TCTGCAAGGGATATATAAGTGAACATTGTCTATATCGGAGAAATTCCTAAAATAGTTGACCTTGTTCTTGTCTATGACAGGCAATTCA
Marker15062	TTTGTTGAGCTGAGAAAATTACGGCGATCTGATTTCAATTACTTTCTTAAATTTTGATTTGTTTCTTCATATAACAAAACAAATACTG
Marker15137	CTGGTTCCTCGGACGGGCCCGGGGTCCCCACGTTTCTTCCACTACACCCTGCGGTCTAGGACCACGAAGCACGGGATGACCCACATCT
Marker15154	GGAGAGTGCTGATTTCTCCCCACTGGACACCACTTCGTCCCTTGGGTCACGCCTTCACACCAGGTACAGCCGTGGGAGAACTGGGGAG
Marker15217	TCGATATGCAAACAAGTCTTAACTGATCACAATACAGGTGAGGACTATTGTTACAATTATTTTCACAAACTGGAAATGGTTCGTATGT
Marker15219	TTCGCCTCGGGCGAGAAGCAGCCCTGGGCGGAACCGCCTGAAGAAGATAGGTGGCGCCCGGAAGACACATTGAAACCAGAGGGTTCTG
Marker15238	CTGTACCTGCCTCTATGAATGGAAGTCGACCACCTTTCTCAGGAGCATCTGCCCATCCGATGGGCCACAGCATGGAGACGGCCACCTC
Marker15280	AGCACACGTCTGTGTATCCGATGGTGTCTAAGACCCTGAGAGAATATTACGGGGAGAAGGGCCACAGCCACGATGATGGAAAACATTG
Marker15291	GTTGTTATTTTAGGAAGCTGTCCAGCGATGAACTGTCCAGGAGAAGGTTTTGTTGGCAAAGACTGCCAATGTAAATGCCCAACCAACG
Marker15317	GTTCTCCACTTGAACCGCAATGATTGGGCCCCCTTTGTGGTGCTGAAAAAGAAAACAGGTGCCAGTACCAGCAGATCACGAGGTGTTT
Marker15321	TCCACCATTGACACCAAGAAATCTTGTCCTTACCTTTCATCTGTCCCATGTACCAGTTGCCGCTGCTGTCCATCCCGCTCACATTGCT
Marker15339	TGAAAGCCTCTTCTTTCTATTTAAGGAATTGTATCATTTAGTGTAAAAAATCACAGCAAGCAAAAATATGACAAAACCACTTCCCTAC
Marker15423	GCTCCTTCGCCTTCGCACCTTCGCACTTTAGGCATCACATCTTCGCGCTTGGTCGTCGCATCTTCGCAGTTTTGCTCATTCGCCTTCG
Marker15497	TGCTCAATCCGTGGTGCTGTGAGAAACGTTGGATGTAATGGATCCAGGAATAGTGCGTCTCCATCTCATTCCTCATAGACTTTGTCTC
Marker15528	CAAATATTTGTATAACTTAATTTAAGTAATGATAAACATTAAATCCTTTAAGGCAGTCAGGGACCGTACATGTCCCCTGTCCCCACTT
Marker15614	TTTTTATACAATATGCTACCATTTCATGATTAGTTCTGTAATTCAAAAATTGAACTTTATTTTATTTACAATAAATTATTTTGCATTC
Marker15742	TGGGATTGGACTTCTCTAGGGGAACTAGTCTGTAAAGGTCTCTTGCTTTTCTTGGATGAACCTCGATTACCTTGAGTGACGTTGTCAC
Marker15743	ACTACAGAAGACAACTGTGCCGGCCAGGTCAAGCCGCACAGTGAGCAGCAGTGTCGATTGGCGTGTGTCGGGGAGTGCGTGATGTCAG
Marker15747	TGTGTTTTACAGTGAGTAACTGTCAGGCCACACTAAGGGAACAAGGAGAGTGCCCGACTGTGATTGAGTGTGACACCTACACGTGGCA
Marker15749	ACATGATTTGTAACAGGACTGCTCCTGCAGAGGTTCGTCATATCCCGAGTTCCTACACAGCGAGTGGGGAACACTCTGTTGGACGGGA
Marker15781	TGGGATAGGTGTGGTGCTTTTGGACCACTGCCGCCACTTGTGACATTTCCTGCATTGAACCCAGAACGGCAGGACACTATTGGTCATG
Marker15823	CTTTTATTTTGATTAATGTTTATATACGAAATCTTCAAACAGGTGACAAAATTGAAATAGTGTTTTGTGCATGCTACCACCATTGCAT
Marker15843	TCGATCTCCCGGTATTATTAGAAGGATATCATCATATGACTGTTTGAATTTTTTCTTCGCATTTCATATATTAATTCTAGTGTGATTA
Marker15846	TTATTCAAATTGGTCCAAACAAAATTTCACAGAATAATATCATCGAAGATATATAATGTATGAAAGTTGCCATTTTTTTCTTCACNNN
Marker15856	TTTGTTGAGCCGAGAAAATTACGGCGATCTGTTTTCAATTACGTTCTTAATTTTGGTTTGTTTCTTCATATAACAAAACTAATGTTGA
Marker15900	CACCAGCAGTGACCGCAGTCCCAAAAATCAACCGTCCTAGATGTCCGACATGGTTATACTTTCAGGTGGATCAGCAATCTACATGTAA
Marker15925	TAAGTACATTTTGCCGTTGTGCTGGTTTTTTAGCTTGTGCTCAGATATAACGGCAATATCACAGTGTGTATTGTCTAGAAGGGAATTG
Marker15945	CTCAATCCATTTCAGTCCCAGAGGCTCTAGTGCTCTTGCCAATTTAACAGTATACGGTACTGTTAGTGCCATGTAGCAGTCTAACATC
Marker15955	ATTAGAATTAATAAGATTTTGTGGGCCCCTAAGTAAATAAAAAGTAATATTAGGTCAGGTTCTATGATAAACAACCATTATACCTAAA
Marker16002	AAGTCTAGTGAGATCGTCCGACATTGATAAATTGCATTGTGGGTCGAAATTTACTGACGCCGAAAAATTCTGTGGGATCAATGTGCAA
Marker16014	CAGGATAAATCGCCACTGTACCCATCCACGATCGGATGAAAACCGTACGACAAGGTACGACCGGCTTTAATGACTGTACCCACCCGCG
Marker16022	GGATAATTTTGAAAATGATTAATTAAATAAAAAATGGGTAAAATACCGGCATCGGTCTTCCCCATGTGCGGATCTACATGGAGAAGAG
Marker16062	ATAGGGCGATGGTAATGTGCAATATCCTGGCCACTATACTTGAGGCATATTTTATTTACTAAACACTTGCACTTTTCGTTAGAAGCAA
Marker16129	ATGATTTTGTAGACCAGATCTTTTAGTTTTTCACCAAAATTATAGGTTTCACAGTTCTTTTTGAAATGTGGTCGTCATTACAAATTTA
Marker16167	TGCCTGCTCTCTTGCGCCTTCAGGTGATCTGGATCCTTCCTCGCCATCATAATCTACCTCCTCAGCTTTTTCTCTCCTCCTCTGCATT
Marker16168	ATGACAAAACAGCTAACTTACATAAGGAGGCATCATCCGATACTGAGGTGGCATTCCCATTGGAGGGCCCATAGTCATGGGCCCTCCA
Marker16231	AATATCAATAAATATCAATGGTTGATTTTCAGTCCCCTGCCCTTTGGACGATCAGTGTGGACTTACGTGGTGGGCCAGCTGGAAGCGG
Marker16328	AGGCACGAACGCCAACCTTCGGCCGAATACCATCACGACCGACAGGGCTCGGGAGATTACCCAAGGGGCGATGGTCGCTACCCAAGAG
Marker16336	ATTGTGGCTTGTCATTTGCTATCTGTTAGGGGCTGAGATAAAGGGTTCTCTAGGTTACACCGGCTGTACAGATACCTCCCTCAACTAC
Marker16345	ACAGATATTTATTGGCTTTGATTTAGGAAATGACACACGTGCACTTTTATAGCAAATTGTTTACCTGTATATATTGCTGTCCAGTTCC
Marker16367	ATGATATACCGTAACGGTTCCTACCTATAACATACTTGGTCCCCGCTATAGTGGTGGTGAAGGCCCTTCGTTTGTACCGCGGGGAGCA
Marker16429	TTTCACAGTGTCTACCTCCAGGCCGCATTCTATCTTCTGCGACAAGGGTTTCACGTTAGCAGTGACTTCCGGCTTATCCTGTTTGCTA
Marker16437	CAAGTATAGGTTCTGTCCAGATGACAGAATGTTCAGAGTTCGATGACCGCAAAATTTATCTATCAATTTCGCTCCGGTGTTTGATCCA
Marker16513	TGAATGTTTCAGCTTGAAGTTACAATCATTTTGATTGACAAGAAACAACAGAGAGTTAGCAACATCTGGTACAATGTTGGCCCCCAGT
Marker16514	TCCTAACACGATAGCTTTGTAAAAATGTAATCGACGCGGCCATTGCAGCTCCAACAAGAAAAGGGCGTCGATAGCCCCTCCCAGTGCC
Marker16538	CTCAGCCCATCCGTACGCCACCTACCCCTAGGTCGTCCAGCTCGGTGGGGAATGCTCTGAATACAGATAACCACCCTTCGAATACACA
Marker16544	CCGCTCTAACCACCACCAGAACGCGCCGCAGCATCATCAACAGCAGCTTCCTGTACACCACGGGCACGGCCACCCTGCTGGAGCTCCA
Marker16559	CCGGTTCATTCACTTCGGGGGAGGGGGTGTGGCCCGACCTTACATGACCTGATATCCCAGGACGTTCCCCCACTCCCCGGAGGTTGTC
Marker16564	TGTCTATTTCATCAACAGTCGTCTAAAACTTTAACGACCAATCACATGATCTGTGGCTAGTCTCCCGACCAATGAACACATATCCCCC
Marker16569	TCCAACCACTCACTACATCTCTATAGAAGCTGCATAAACATCTTAGACTATAAAGAATACCTACCTCCACAGAGATCTAAAGATATTC
Marker16573	GCTGATTTAACTGCAAAACTTGATGAACTGAAACAGTTAGCAGCAAAACATTCCAGCGAGGACGATATGGAGTACACGCCTAGTGATC
Marker16655	CTTTCCCCCAGGAGTTGGTCTTGGGAGGTGTCGACGGACAGGTCAATGGACGCCCTACCCCGCCCATCTTCACTAGCTGCCACCTTTG
Marker16656	TGTGACATTCTACACCATTCTAATTAAAGCTGTGTACGGGGGAACCCCCAAACTGACGGGTACACAGACCCTCTACGTCAACGTCACG
Marker16678	GCCGTAGGAAAATTCAGAAAGGCGTTCTTACAGAGCTCCCAACTACGTTTCCACAGAGTTCTACTTGGCGATTGACTGCCCTCTCGCT
Marker16697	AGAACGCTGGGGAGATTGCTCGGTCGTGTTGTTGGACTTAATTGGGCCTCGTTTTGGATAGAAGCTATGACGCTGGTGGTCACGTGGT
Marker16709	GAAGACATGCATTTAATATTTAAGGAATATATGTTATAAAGGAACGTACACTCTTTGATTGTAATTAGGTGATGAAATACGGTCGGGG
Marker16714	CACAAGGTACGAAAAATAAAATAAATTACACTTGTAACAAATAAAATCTATTCTCCTTCCCGCGCCTCCGCCATCATCTGGCGGCGCT
Marker16748	TCGAAACAGTTTATGCTGTTCTCTGCACCACATGTCATTGCTCGATCAAATATAATCAATTAACAGAATATCTGACAAACTATTGAAA
Marker16750	CTGTATGACTTTTATCAACAGGCCGAGAAGCTGATGATTATGTATGAGGAGACAAGGAGAACACGGAACATGAACATGAACCACCCGC
Marker16806	ATTTGTTTGTTAGAAATGATAAAAGGAATGGTACAGGAAAAGGAATGGTACAAGTAACGCACAGTATACTGACTACATACTGACCTCG
Marker16842	GTAATCTTTGAGCCTCGCTGAGGGGTCGCGGGGTGGACAGGTGTCCCAGGATGTCCGCAGCGAGGGCGACACTGGTCACGATGATTTC
Marker16893	TTCCTTGCTAAGCACTGTGTGGTCCATGGACACACGCATTCCACGATGAACCTTGGAGCAATTCTTGCAAAGCCCGTCCCGGCATTCT
Marker16915	TGTATCACCCTCTCCGGCGACGTGTGTACCGGTTAGGTCTCCCAGTAAAAAGGAAAAACACCGACCAGAAAAACCGCAATCGTGTCAA
Marker16945	AAATTGGGTATATAGACTAGACAATATTGTATGGTATGTGGGACCGTAAATAACAAGAATGTAATGGTCAACCAAAGGACAACGGGGG
Marker16994	ACTGTTACTGGTTGACGTCAGCACCGCTACGGGGCGTCAAGAACTGGAGAGTGACTGACGCCATTACCAAGTGTCAGTGCGAAGGGGG
Marker17028	CATCTACGTCCATTAATAGGTCTTATATTAGCAAATGCTACTTTTTACATAGTCATCTACATCCAGATTGATAATTATTACATCGCTT
Marker17037	GCCCCGAGGGCCCGGCCTTCTCCCACAACCACAGTGTAGGCGTCAGCTCCTTTAGCTCCTCCCCTGCTGTCAATCACAGGCGACCCAG
Marker17069	CAGTTTGTGGATTGGAGGGAAAACTAATTTGAGTGTTGGATGGAAAGCCTGATTGGTCGTTTGGCGGAAACCCAGTTTGGGGCATTCC
Marker17120	TATGGTATCTATATAAGTACCTATTATCCAAATGCCTAATCAAAGTAATTTTTATAGAAAATATTTCATTTTTGCTGTTTCTAGGTCA
Marker17124	TACGACGAACCGTACGCGCATAATTTTCGGGCATGTAACAATTCGTTGTGTTACCCGTTGCCAAGTGTGTTGCTAACGCTGAGGGTAA
Marker17166	TCAGAAAGGGGGGGATCAGAAGAACTCTCAGGGTGATAGAGGAGAAGGGGGAGCAAGTGGTGGCACGGCCAACGGGGGGACAGGTAAA
Marker17205	ACGTTCTGGAGACACACATAATCCGGTCAGTGATCGATACAAAACAGTCCACACCACGGGACGTAACTCTGTAAGTCGTCTAATCGAC
Marker17242	TTGTCGGCTAAATCTTGGAACGGCCTGTTTTCCTTCATGTAGCGCCTGCACTTGTAGCAGCAATAGATGCACGCGCATCCCCCGTACA
Marker17344	GCTATGAAACAAGAGTTCTCGAGAACTGACATTTATTGTTTGTCCCGACTTTTTTTGTCTCACAAAAAATCTACTCGGTTTACTGTCG
Marker17369	ATTTGTTTGTTAGAAATGATAAAAGGAATGGTACAGGAAAAGGAATGGTACAAGTAACGCACAGTATACTGACTACATACTGACCTCG
Marker17384	TACCTGAAGTTTGCCATGGAATATGTTCTGTACGAGTTTGGCCATCACTGTGTCTGGGTTACTGAACACCTCAGCGATCACCTCACTG
Marker17394	GCATCAGCTGAGCAAAAGTGACGTTCCCACACCTTCAAATACCCGCCGGCGACCAGAGTTTGACCTGACCTGTTGATTTCTTAGTCAA
Marker17442	TGTGTTTAAACAGAGATATTTTTGTTCCTTGATTGTAGAACTGTGGCCAGGAGCAATGCCGTACGCACCAGGACTGTGCGCTGTGTAA
Marker17544	ACCAACGCTCCCACTACCAAAGCTCCCCTCCCTGGATCCACCAATGCCCCTACCCCTCAGCCATCTGGAATGCCAAATCCCAACCCAT
Marker17569	CCCAAAGAAAGCATTTTATTGTTGAAATAATTAAAGCCAATGTTGTTGTACAAACAATTTTTCAAGTGTTTCAGGTAAATTAGGTTGT
Marker17612	GCCTCATCTTCAATCGTCACGCATGAGCGAGTTCTCGGACCAGCAGTCCCTGTCCTCGGGGGACACAACAAACCGGAAGTTGTCGCAA
Marker17613	AGTATCTGGTACTAACTCTGTATTTTTTCTGTTATATTTTGTTCAGTTATTATTCATATAATAATATGTTCCTGTAATGGATTATTTT
Marker17617	CTCCTATATGCTCAAATGAACGACTTTATGTTGATAGTCGCAGATGCAGGGGCAGACAGTTATGACCGCACAGATAAGTTGGCGGGAC
Marker17618	TGTATCTCACTGAGATGGACTGATGTTACATGTACAGAGATTGTCCATGCTGTGTGTATATAACTTGTATCCTGATGGTGATGTAGTC
Marker17650	AAATGGACCGTACAATTTTCCAATCAAGAATGCACGGGCACCTGTTCACAGCATGCGTCCGTGTCTCAGTAAGGCATGTTGAGCTCTG
Marker17665	ATGTTGCTGGTCCACTTTGTACCAATCTGGAAACAACCCTGGATAGCCATGTATCAACTTGTAGTCCCCAACCCTGAAATTATAACGA
Marker17704	ATCAAAAGGAAATTCCGGATTGACTACGACGTTAGCTTTGAACGGGTGCATCGCATGGGAAAGTGGTCTGAGCATAACCTATACCCCA
Marker17707	CATAATTCGAGACCAACTAGCGATACAGGAGACCCCTAACCTGTGGTGTTTCCTTGGCGACGTGACAAGAGACGTCAGTCATTACCTG
Marker17713	TACACTGCCTGAGGATGCTTCCACATGAGTTTCAGCTTTCCTGGCTGATAAGTTTGAGAAGAAGATTTTCAAAGATTTACTCTATATA
Marker17756	TTGCAAAAGCTCCCAACACATGCAACATAACCAGTGGCACATATACAAAACATCAGAATTTATGTGCTGTGTATATAAATCAAATTGT
Marker17766	TGATACTAAAAGTTTAAATATAGTTTTTTTTTCATATTTCTTTTAAATATAAAAAGCGTGTTTAAATACAATATCCATGTATAAACTT
Marker17777	CTTCATCACTTGGTTTATTTCTCTGGAACTGCATACTGGTGGACCTTCGGGAATACGGCAAACCTACCCTTCGTTTTTACCTGACGGC
Marker17778	CCCAGACAGAGGAAGAAATCAGAACCTAGACAGGAGGCGAAGTCCGGGGTACAGCAAACGGGAATGGGACCGTCACCGAAGTCCCCCT
Marker17838	TTGCATCAATTGCCTGTTTATTTCTCTGGAACTGTATACTGGTGGACCTTCGGGAATACGGCAAACCTACCCTTCGTTTTAGCTTACG
Marker17862	TACGAGTTATGGAAATGTTGTGAAACATATTCCTAAGGAGTGACCATGGGATTTGTACGCTGGGCGCCAAATGTCACAGGTGGTGAAA
Marker17899	GATAGAGAGACAAAAAGAGATGGTTAGGAGACAAGAAAAACTTTTCTCGGACATGACTGAAGGGCTCACACAGGTCCTGGAGCGTTCA
Marker17947	GTGATAAGGTACATGTAGAAGAACACGAGCCGACCGCGGATCACTCGTCCACTCGCGCTATATATCCTCGGCCATGTGCGAGGGATGA
Marker17986	TGTGATGAAAATTCAAAATGCATCAACATGCCAGGGTGAGAGGTAAATAATAAACCTACGGTTGGGGGAGCTTCGCGCCCCACCCGGC
Marker17987	ATGATAAATGCCTTAGCTTTCACTGTCATGGAAACAAAAAGAAGCAAATTCTAACTGTCTCAAAGTTTGGATGTAATTAAGTCATTAT
Marker18003	TGTTATTACATTACTACCATAACATTTTCAAATATACAAAGTGGGATCATTTACCATTCTTTGTTACAGCCCGGATCCTGCTGGTGGA
Marker18024	TCTAAATTATCAGAGATTACTTGTTTTCATTTTTCCCCTGCCCCTGAGACAGGTGTGGTGGTACTGACCCTGAGTTCTGTGGGTCCAG
Marker18073	AATGAATGTACTAGTATTTGTGTATTTTACTACCAACCTTCAGTGAAGCCATGCCTGTGGTTGTTCTCATACCAGAACCTGTCTCCTT
Marker18085	ACCTTGTCCGCCCGTCCGTCTGTCCGTCCGTCTCTCTGTGCAATCGTGTCCGGTCCATATCTTTCCTATGGAGAAACATTGGAAGTTC
Marker18099	AATGAATATGGTTTTACATTGTTGTTTTCTTTGTATTTTCAGCTGATCCAAGGATTACCAAGTCTCCATTTAACCTCGGGGCTGATAT
Marker18101	TCTGTCATTGTGTTGTATTTGCTGACAGTTCCCCCGCGGCACACGTTTCACAGAGAGGAGGACAGTTACACAAACTTCACGGTGGTGG
Marker18149	GCATTTTAATTTTTTCAATAAAAGTGTATAACTATGATAAATATTGCCATTCATATCATATAACATTTTAAACATTCTGGTTCTTTGA
Marker18159	GCATCAGCTGAGCTGACGTGACGTTCCCACACCTTCAAATACCCGCCGGCGACCAGAGTTTGACCTGGCCTTTTGATTTCTTAGTCAA
Marker18219	ATATCCCATGTTATGAAAATTATGGAGTTTCATGTCTCGGTTGTTTTGCGGGAAGCTACAAAGATACAATATATTATACATTTCATTT
Marker18222	ACACAAATAATACTGGTATATCAAAATGTTGTGCAGTAAAAACCAATAATCCAAACACAAAACTTAAGGATATATAGATATGACGTAG
Marker18231	ATTAATTATAGTACATAACATGCAGTACATTTCATCATTTGGTTATATTATTTTTACGGGCAATGATTTCGCGCTGGCTGTGGCACTG
Marker18274	TGAACGGTCTTGGTCGCACATGTTCGCCGCTGTCGAAATATATTTTGTGTGGGACAGGTTGACCGGGCGGAGGAGGGGCAGCAAATAT
Marker18295	CTACCTATAGCGAAACACTCTGAAGGGATTACACAGAGTTCTGAATGTTGACTTGCTTATTGACAGAGATTAGACGGGTCGGTGAGGG
Marker18317	TTTAATTTGATACGGTCATAGTATTGTATGCAATAATATTCAGGCTAAAACAGCCATATAATTATATAGTATTACATGGTGTGTATCA
Marker18501	AATATTGATCATGACATGCCATTGTGATACTGACCTCGTTTAACATGGCCAGCACTACCGTGTGGAGCTGAGCATTCACTGTGTCTGG
Marker18525	TTCACTATATATAAAAGCTTTTGTGTAAATATTGGCATTTCTGGTGCAGTGGTTCTTGAGAAGAAGATTTTTTAAACATTTTCCTATG
Marker18547	TTTGTTGAGCTGAGAAAATTACGGCGATCTGTTTTCAATTACTTTCTTAAATTTTGGTTTGTTTCTTCATATAACAAAACAAATGTTG
Marker18560	TTTACCTATGGTGTTCCGATGGGGCCACTTCGACCTTCGAACTTTCGCCTTTAGGTCGAAGATGCGAGAGTGCGAAGTTGCGAAGGCG
Marker18563	GGTTAACATAGTACGAAATCCTAGCGAAATGTCGGCAAACCCATTCAACAACAAAGACCTGTCTAAGTCAGCAGTCACATGATCACAA
Marker18603	TAAGTGACCTATCTCAGAGAGTGCTGTTTAAGTCTGGGCTTTCTGCGACTTACCGAGGGACCGTGTTGACTGCTCACTGTTCCCGAAC
Marker18608	AGGGTGGGACCGGTCTGGCCTTGACCCCAGATGGCAACATAGCCATAGTAAACTGGAGGACCAAGACTGTCTCCATAGTAACCAAAGA
Marker18616	TTAAAAACGAAAATAATTTCCTTCTTTAAATTCAAGTTTCATTAAGAATGGATACTATTGATGTTGCCGTAGGGTATGTAGATGGCCC
Marker18672	ATTATCTATAATTATAGTTAAAACTGTATATGTTAAAATTGTATAAGTAACCATATGTTTTGCGGTATTTATTATCTTACATTAAGGT
Marker18690	CAGAGGAAGAGGCCAAAGCAATATCTGTTCCGGGCGGGGTGTCGGGACCAGGCGTTCGGGGCACAACAACAAAGGCAGCTGAAGGAAT
Marker18691	CAGAGGAAGAGGCCAAAGCAATATCTGTTCCGGGCGGGGTGTCGGGACCAGGCGTTCGGGGCACAACAACAAAGGCAGCTGAAGGAAT
Marker18692	CATGCATATGAACTTGTGTCTAAATATCACACTTACATCAAAGTTTTCATTTTTCTCATCTTTCTCAACAGGAAAGGGCATATGGTCG
Marker18698	ACTGTAAATGGACCATTATAACTCTCAAATTAATGGTCTTGGAGGCAAGCAGTTTGTTGCACTCTAATGAACTGACAATGGGAAGGTC
Marker18706	AATAAAATCACTGAGGTGGTAGACATTGGTTTTGGTCATACAGAGGTCTCCCTGAACACTCGTGTGGAGGCTCCATTCTGCTGACGTA
Marker18715	TCCGGAGCTAGAGAGAGCGCTGGTCAATCTGGCCAGGCGCTGCGCCCAGCTCCATACACTCTGTGTATACTGTGTGTTGAAGAAGGAT
Marker18724	TATGGTACTGTGATTGTAAAGTTGAAGACTTGTTGATATTCAGTAACTCTTTGTATTGTAGGATGAAGAGGCCTCAAGACAGAAGAAC
Marker18776	CAGCGAAAAGGTGCGATTCGGACTTATAAAGCATCAGATGATGAAAAATACCGAGTCGCTTCTTCCGACTTTGACAAGTACTGCACAA
Marker18801	TCTCGGGTGGAAGGGAAAATTCGGGAACATTGTCAATCGTCATGGACCGGACGACAATTCCACGCGCATCCAGCGAAACGTCCGGACA
Marker18803	TGCAGGGCTGATACGTACAGATCCATACAGCACCCTTGCGGAACTCCTCTGATTTTTCTCCTTCAGAATTATGGAAAAAAAGACAAAA
Marker18836	AAAATCCACTGATATTCCCAAAAATTGACTGACATTGTCTGACATCTACTGTATAACCACTGTACCCTACTGTAAATCCACTGTACAC
Marker18837	AAAATCCACTGATATTCCCAAAAATTGACTGACATTGTCTGACATCCACTGTACATTGACTGTACCTCACTGTACATTTCACTGACTT
Marker18848	CCTGGGATTTTTGTGTGATGTGACACTTTTGCTTTAGATACTCTGCCTCCTCTTGGTACATACCCAGTTAAACTGTAGCTTTGATGAT
Marker18914	ACAAAAGTGTTCTTCCGATCACACACATATTATAACATCAATTCATATGTCAAACGTTATGTTGAAGTTCATAAGCCAGACTTCATTT
Marker18955	AGACTTGGTCGTGTACATGTGTACAAAAGCTCCACTACCTCGTCTTTCATCCCTGTAAATCTATCCAGTTGATTTTCTGGGGTGAAAT
Marker18957	CGTTTATGTCCGAACAACAACGTTCACAAACCCGCCACGCAGGCCTGTCTAGATCAGTACGTACTTCACCAACCATCTGGGAGTGTTC
Marker19013	TTTTAATACGTTCTTTATCCCTAGCTCGTTTTCTGTCCGATTTTCTTTTCCCAACTTCTTCTGTTTGCGTTCCAATTGTGCAATTTGG
Marker19019	GCATCAGCTGAGCTGACGTGACGTTCCCACACCTTCAAATACCCGCCGGCGACCAGAGTTTGACCTGGCCTTTTGATTTCTTAGTCAA
Marker19021	CTCATGTAATACATTTCATGCGCGGGTCTACAGGTGCAGTGGTTGCGTATCTTTCCCCTGAAAAAAAACTTATTAAATAAGTAAAGCA
Marker19068	GGCAAACATCGGACAGAACGTTGTAGCCCTCGTGTTTTGTTACCGGGTCGTTAGACCTACAACACAAGGCCAGGGTGTACAGTAAGGG
Marker19069	AGCGTGGGGAACCGATCATGTAAGCAGCGCCCCCTACTGTACACCCTGGCCTTGTGTTGTAGGTCTAACGACCCGGTAACAAAACACG
Marker19087	GCGTTGTATTTGTTCGTGGGGCATAAGACTAGTCTTACAACACGTGCACTCTACCTACCCAGAGCATCAAAAGTCACATTCCAGTCTG
Marker19123	GGATGCTTTGAATTTGCAATCTGGCAGCGCAATACCATATGCTGTTGAAGTGGTCGACACATCTAACGCCTATGACAATACCAACCAT
Marker19146	AGACTGACCTCTCTGGACAGGAACGTGATGTCGGCCTCGTATTTATTGTTGGTCGTGTTGGTGACCACCTCCACCACCACCGCGGTGC
Marker19149	GCCCACAAGTCCCTCAGAGAGTTGATTTTGTCGTCCATGATGTAGTACGCCTCAGAGCGCAGGCGTCTCAAGATGGCGTTGTTTGGTT
Marker19150	ATATAATAAAATTTTAAAATAAAATAAATATTAATAAATACTGAAAAAAACTAATGCAATTAACTAATGCACCATTATTAATAATCCC
Marker19157	AGTGATGTAGAGGGCTGTGTTAATTTGTTAGAGCGAGCAGCTGACCTGTTTCATCAGAACGGTACTGCCGACACAGCAGCCCTGACAC
Marker19158	AGCTCGTCGGAGGGCAGTTGCGGTGTGACTCGCAGGGGGCCGTTCGCGGTCAACGCTTGTCGCTGCTGCGATCTCGTTCGACGACGTG
Marker19206	CCAATTTCAGAGTTCAATAAAGAGATAGTCAAGAACAAAGGAATGGCGCTGACCCTGCAACAGTTCAAGAGCATGATGATCAAGAAAG
Marker19208	CATGAAGTTGATGGGGATGAGTGAAGCCGTCTACTGGGGCGCCGTCTTCGTTAAGGCCATGCTATTCCTGTTCCTGGCCTCGGTCTTC
Marker19240	ATCTCCCCTACTAAGTTCTGACACAACTGATTTTACCGGAAGATCCTGGAGGGGCGCTGGTTCGATGTCAGTCTCCGGGGCTTCCTTT
Marker19241	AAAATTGAAGAGATCGACGACTTGACATTATCTCAAGTTTGTGACGAAATGGAAGCTTTCGACGGATTGCTTAACATGAGCCTTACCC
Marker19247	GACCAGTCCTGCATATTCATGTACATATATTAATATGACCTTAAAAAGACAATAGCAGAAATTTTGCAATCATCTGTTCCAGTTAGCC
Marker19262	CAGCGAAAAGGTGCGATTCGGACTTATAAAGCATCAGATGATGAAAAATACCGAGTCGCTTCTTCCGACTTTGACAAGTACTGCACAA
Marker19293	TCCATGTCAAAGTTAGATTTTCCAGACACGTTTTGGGGCATGTTTTGGTTCATGACGTCATCAATGGCGTCACTGTCTTGTAAGTCCA
Marker19304	TTTGTTGAGCTGAGAAAATTACGGCGATCTGATTTCAATTACTTTCTTAAATTTTGATTTGTTTCTTCATATAACAAAACAAATACTG
Marker19321	TGTTAAATAACAAAGTGCTAGTCAATGTACAAAGTTCCATACTTACATGTCCATTTACCCATATATACCATGCAAAGCACAACTACAT
Marker19337	CCAAATCTGTGAAGCACCAACTCTCCTCCAAGTCGGAGCCACTGTAGTGGAGCACAAGCACTTTTGTATCCTTGCGGTTCATTTCGTC
Marker19345	ATCTACAAGAGGAAATCAAGAGTTATTTCCCTTTCACTGTGTAACTTCAAACAGATATAATAGTTCTGGGAACACCCATCTAAGGACT
Marker19377	AGGCTTTTCCTGCCACGCCCCCTTCCCCGTCCCACACCTGCATGCTCAGGCTGAACAATCCCAGGATGCACTGCACCCACAAATCCAG
Marker19385	TCAATTAATGTTCATTGTTGCCAAAATATTCTAATTATTAGGACAGAACAAACAGTATTTGTGTTGTATTAGAAATAATCAATACCAT
Marker19439	TCGAGGAATTAAGCGTCAAAGTCCTGAAGCGAAAGTCCGAGTAGCTTAGTCAATATAGTCGTGGACATGGCCCAGGCGACCCGGGTTC
Marker19501	ATTTTAAATTTTGATGTATCTTTCGTAACTTCAATGTTATTTGTGTGTGTTACTATTACAGAAGAAATTTACATCTGATAACTCGTAT
Marker19506	CAGTCATCGTGGTAGATTGGAATATGACGGCTATACATGATTATACACTGCTTCTTCTTTATACACTTATTAACAACTTGGTTATCCT
Marker19510	ACACTTTAAAATAAAAGGATCTTGTTACTTGTATTTGAATTATTATTTGAATGACAGCAATATTATCAAATTTCACTTACATTTTTGT
Marker19547	CAGATTTCATTTGGATAGCAGTGACGGTCGTTGTAGGGTGTATCGTCGCGTTGGGGAGCGTTACCAGGACGCTTGTGTTGTGCAACGT
Marker19633	AGTAGTTCTTGAGAAGAAGATTTTTTAAAATGCACCCCCCTTTTTCTACAGTTTCAAGGTTTTCTCCGCTTTGAATACAGATCGGACT
Marker19697	AACACATAATCTCCTTATTATTAGAAGAAACCATGCTTCGGCCTTGGGCAACAGTTTGCGAGCCGGTCCGACAGATCAACTGTTGCCC
Marker19710	AATACATGTATTAAAAATTAAAATTCATATGGAAACAATTAATGATTGATTGTAATTAAGTACATAAATTCTAGCAGAGTAAGATTTA
Marker19720	TTCGCAGTTCTAAAGTTGAACAACCCCGCCGAACAATAAACGCTGTGAATAAGAGAGGGTTATTAATTACATTGCAGCCACCCATTTA
Marker19744	TTGTGCAGATTTTAGTCTCGGACAAATGTTGAAGACATTTTGAACTGATGTCGTCCCATCTTGTGTGCACGTCGACGATAACTCGTAT
Marker19772	AGATAATTTCTTCATTGAAGTTAATGTGTTTACATCTAGGTAACACACTCATTGGCTCCATCAGGTGTTTACATAATATGTTTACATN
Marker19803	GCAGGTAGAAGGCCGCCTCCTCATTCTGGTCCCATGTACAGGGAACCACCACATACTCCCCCGGAGGCAGGGAGAGCCGCGCGATTCG
Marker19835	ATTTGTTTGTTAGAAATGATAAAAGGAATGGTACAGAAAAGGAATGGTACAAGTAACGCACAGTATACTGACTACATACTGACCTCGT
Marker19873	GTTATCACACAGCATGAATATGGGTGTTGCGTGGACCCTGAGGTCCACGCAGAAAATATATAAGCGAGGTTAAACCGGAGGCGATGGG
Marker19926	CAGCGAAAAGGTGCGATTCGGACTTATAAAGCATCAGATGATGAAAAATACCGAGTCGCTTCTTCCGACTTTGACAAGTACTGCACAA
Marker19930	ATTCTTAAACTCTTAATTTATCAGTAGATATTGAAACAATACGACACAGATGTAATCATAGCATGCATTGCATGCCCTGACTTTTATC
Marker19991	ATCTGTTTTCGTTTCTGTCAAACCAAGAATGTCAAAGCCAGATATGAAATGGTTAAACTCATCATAATTTAATTTATTTTTAATGCTA
Marker20002	TGAACCTTCAGATCGTGACAGCGGAGCGCCTGCGTGACAAACTTGCCAGGATAGAAAAGTTACGTCACAATATCCTCGTCATGGACCA
Marker20003	AAGGAAGAGGTAGAGGAGGATGAAGACAAATCAGAAACAAAATCGGAAACAATGGACAGAAAGAAAACTGGAGCTACTTTAGACATGG
Marker20008	AGTCACTTAAACTGATACTATGTGAACCCACGGACTATTAGGTGTAAACAAACTCGTTCCAAATTCAGTAATTGCAAGTTGTCTGGAT
Marker20078	ACTGACCGTTTTTTAACCTTCCTTCTAACACATAATGGGCGTGACTATATCACCGAAAGGAGGCATGATCACTTACAAGGTTGCTATG
Marker20355	ATACATACCTGTCTAAACATAGGGGCTCGCGGGGTTTAGTGAATTATAATCGGCCTGGCATCTAACCAAACATCGTTAGTCTAAAATA
Marker20439	AAGTGAAGTGTGTAGAAAAGTTATCAAGTGTGTTAAAAGCATATAGCAGCTAGAAAGGAGTGATCAGTGGTTAGGGCTATACTCTTTA
Marker20450	TTCATCCATGTACGCCCTGATGTCCGTACTCTTCTGCGTGCTAGACATAATTGGGTCTCTAAACGCTTGAATGACTGGGATACGGTCA
Marker20468	TTGCCCGCTAGATTGGCCAGGAATTGGTAGTGGGCTTTGGATCGCACGGGGGTGAGGGTACTCGGCATCACACTCAGAGACTGACAAT
Marker20471	CCTTGGGACCCGTCAGAGCACTGTGATGTCGCGCCAGCAGAGGATCGTCCCAGTGGCCGTACAGATCGTACATCTTCAGGTTGATATA
Marker20476	TGATGAGCTTGCGTTGTGGGTACCGGTCGCTGCGTGGTAAAGTAGAAGTAAGGGCGAGTGGTGTATATGGGGGGACGGGTGATCGGAG
Marker20478	TGGGTTTCCATGAGCCCTGTCCACCAGGCCTAGCGTTCAACGAGCCCATGGCGGAGTGCGACTACCCCTACAAAGTCCCACAATGCAC
Marker20486	ATATTTATTCAAAATATAATGAACATCTGCGCATCCAGTACCTATATTCAATTTGATATCATTTTAAAGAGGAGGTCAATAGCTTGTT
Marker20496	GGTTTGGTAGGACATCGGTCAAATCACATGCATTAAATTTTAGAGGTATGCTACTTAACCCCTTTAACACTTAATTAACATGTACTGA
Marker20547	CTCAATGCTGGCCGGCCTGGGGGGTGAGGTTCGGCAGGCGTTCTATAACCCCCGCCCTGGGGTGGAGAATGTCAGGCTGATCAGACAG
Marker20565	ATTTCTCATTTAATTTGGTTGTCCTGCCTTGGTCCTGGTTAGGATGGAAAATCTCTGAAAATTTTGTGTAAAACTGGTACTTTTCACT
Marker20571	AAATATTTTGAAAACTTCCGACTAGAAGACCCATTTATTGTCCCCCGCCGCAACGCGGAGCGGGGACATAGAAATGCCGGGCGTCCGT
Marker20578	TGTGGACGATTGAGAGTAGGGTCGCTCTTGATCGTAGCGGTACTGCGCCTCACTGAGATCGGACATTCCGCTGTCATTACAGGTTTGA
Marker20588	AACATGATCATAGTCTGCCTCCCTGACTTACTGCACTTGTCGACGGGGCTGATCTCGGAGCTGATGGTCAGACACTGGAACTCGGAAC
Marker20608	CCTGTGCTGTTTGAGGGTCTCCTCGAGGTCCGTCTCTGTGTAGGACCTCAGGGGGGACCTCGTGTAGGCGTGGTGCTGCATCAGGGAC
Marker20668	TTTTTTGTGACTTGTCTTTTTGAACTAGCAATTCTCTTCAGTTCATACTCCAAGTGCTGCTCCTCGCTGCTCTTCCGGTTCCTGCGCA
Marker20680	GCACCCGCACACATTACAGGAATACTTGTATACATGTAACATCATATGAAATACCGGCGAACATTTACATACCCTCACGTTTTTCCTA
Marker20720	AAAATCCACTGATATTCCCAAAAATTGACTGACATTGTCTGACATCTACTGTATAACCACTGTACCCTACTTTAAATCCACTGTACAC
Marker20883	TGTATCTTAATATGATGAAAAAAAAATATTCTGACTTTATGGTAGAGATACTCTTATAGTTATAAGCAAGATTAACTTATATCGTGGC
Marker20930	TCTGACATACTTGGGGGAACTTCAGACACACTTCCCCAGCGGCTGCGCGAGAAGTGGGCGTCCATCTGACCTGCTGGACCAACTTGTT
Marker21026	GCACCCGCACACATTACAGGAATACTTGTATACATGTAACATCATATGAAATACCGGCGAACATTTACATACCCTCACGTTTTTCCTA
Marker21042	ATATGGGATAGTAACTGTGAAAGTGCATTCAAAACATTCAAGGAGGCCTTGACCAGCTATCCTATATTAAGATACCCCGATTTCTCGC
Marker21071	ATCGTCTGCGTCACCGAGAGATGAATTGAAGGCTGTTTTATAAGAGGGCGTTCTTCTGTGTGGATAGATTTCGTGGCGTGCAGAGTTT
Marker21073	AGTCATAATAAAAGTAGACGCTATTCGGGATTTTTAGTATTTTGTTTACTTACATGGAGTTGCAAGGTTTGCCGATCTTTGGTGGTGG
Marker21075	CCTATATTTATGGCCGTGGTGTTATAATTTTCTGTTTGATGTGAGCAGTACGATGAGAGCATGCAGTACCTGTTCGACATCGACAAAG
Marker21110	TTGTTGAGGGGGAGGGGCAGTCTCTCCTATGGGGGTGCTGTGCGCGCGGTCCGTGGGTGTTTCACTCAGGAATAAGAGGTATGATGCA
Marker21119	AAAAAGGAAAATCAAAGTGGCCATCCGTCCGCTAAGTCCAAACGGCAATGTGTCAGGGACTGTTGATGACATCAAGAACTCGGTCAGC
Marker21120	TAGACTTTTTCTCCACCCCAAGTGCTTCCAATGCGTCGGGTAGCCGTGGCAACCTGCCCTCCCCCCTGTCTCCCATGGCAGACACCAG
Marker21121	AGCGGGCCACTTGGAGGCTGAATGACCTGTCAGAGCTGAGTGAAGAGGGAAGTCAAGGCAGCATCAGGGCCAAGTTTGACCTCAAGTC
Marker21148	GCACCCGCACACATTACAGGAATACTTGTATACATGTAACATCATATGAAATACCGGCGAACATTTACATACCCTCACGTTTTTCCTA
Marker21152	TTTTAAAAATCTCTGTTTGGCTTTTTCAAAAGATGGCAGCATTTTCTGTTTAAAAAGTTTGATGTTTGGAAAAGGAAATAATTTAGAG
Marker21178	TTTGACAGAGAAATCAAGAAAATAGGAGTTGAAAATACTTACTTCCCTATGTTTGTCTCTCATCAAGCACTGGAACGGGAAAAAACTC
Marker21197	TCCTTGGGGTCTTTGGGTTCGTTGTTAAGGACTTTCGGAGCAGGTGGGGTGTTGTTCACTGGTTTGGGAGAGGGACCAATCATCCTTC
Marker21289	ACTATTTGGTCATCGAATTAACGTAACGGGTTATATATCTTAAGGGGATGGTAAATGGAGTGCATGGGGTCAATGGGGTCACTTCCGG
Marker21304	ACTTCAACGTAATCCATTGTTTACATGAAAATTAATATCACAGTGGCTTCTTCGTTTGTATTATCGATAAAATTGTCCATTTTTAACT
Marker21322	AAGTCTAGTGAGATCGTCCGACATTGATAAATTGCATTGTGGGTCGAAATTTACTGACGCCGAAAAATTCTGTGGGATCAATGTGCAA
Marker21334	TGTCAGATGGCGAGAGTGAAGAAATCTCAGGAACGTCTAGTGAGGACTATGTCTCCCCGGTTAAACTACGCAACCGACCGCGACGAGC
Marker21346	ATTATTGTAATCAAAGTCCCATAACTCCAACAAAAAGTATCGACCAATGCTGATTTTCGAACTTGACCAAGGTATTAGTGATATAAAC
Marker21383	TAAGAATTTTGAGAGTGAATTTTTAACCGGGTTTCCGATTATTGAAATAGTAAATATTGCAGACGGGCGAGTGGCTGTCAAAAAGGTA
Marker21395	CCCGTCAAAACCTATGGTGAAATACGCAATTTTTACAAAATGCTGTGCTCTCTACCGAGGCATGCGCAAGCACACCATCGCATTCTAG
Marker21429	AAAATCCACTGATATTCCCAAAAATTGACTGACATTGTCTGACATCTACTGTATAACCACTGTACCCTACTGTAAATCCACTGTACAC
Marker21496	ACAACAAATTATTAAGGAAACAAAAACACGTTCCTATTTTGCTGACTTCATTAAGAACGCACGCCACATTCTTACCACAATACGGGGA
Marker21510	GTCCCCCAATCCGATGCAATGATTTCGCCCTTACTATTGCAACAAATGAAAGACAAGTTTCGTTGTCTGGTCCTTCTGCTTGCTCTCG
Marker21531	TCTAGTCAGGTGCTCTACCAACTGAGCTATCTGGCGTTGGTATTCGAACCGGTCTGACCGTCACATTCCTCCCCCCCTTAAATGATCT
Marker21673	ACCAAAGATTGCATTTTATTGTTTAAATATCCATTATTTCTACATGTAAAACACAGCGTCTAAATGCATCTTTAAATGAAACACTGAC
Marker21730	GGGATGCGGGAAAACACAGCTCTCCGATAGTCATCTGGAAACTGTCTTTCTGCCTCCTCTTTACATACATGCAAGATAAATTATAACA
Marker21733	CATATACACTAACCTAGAATAAGTTTGGCGGTGTAGTGGTCGTGTTTGACCATGAAGTCCAGCCCCACGCTGGTGTTGAGTATGGCCC
Marker21751	GCCTTCATTTAAAGGTTTGTTTTCCAGGACTTTAAGGTCGTGCCCGCAGTACTGGGGACGATAGCTGGGGTCGCCACGGCGCTTGTNN
Marker21780	AAATGTCTATGAACATTCAACAAGGCATTAATTTTATAGAAACGATTTAATATCTCTATAATTCATCTCAAATACATGTATGTTTTAG
Marker21815	AAGAACATGGCAAAGACTTGTATAGAAGTATGTCTTGTTTGATTGATGTGTTGTATAAGAGAAAGATTAATGTTTCGTTTACAGTTAC
Marker21830	ATCGTTTAGCCGAGCATATTTCCATTAGAATTTTTTGATGTGAGACCGTGAGACCTATTAATGAATTGACAGTTTTCTCTCCACAGAA
Marker21844	TGTAGTCTTGCCCTGGGGTCAATCCTCTGACTGTGTAGCTGAGGTCAGGGACGTCTCTAGCCACGGGTCTCCAGTCACGCTTGGGTGG
Marker21856	ATTAGTGATGGGCCAATTATCGCCGACAATCGAAAGTCGGTCGCTAAATGTCTCCCGATGTCGATGATCCATTAAGATTTTCATAATC
Marker21863	CTACGCACTGTGAACTTGCGCGAGAGTTGGTGCACGGTGCGGCGTAACAGCGCCATAGCCAGCGCGAAATCATTGCGCGTAAAAATAA
Marker21881	AGGCAAATCATGAAATTTTGCCCATTGCCCAAAATTTGTAAACCATGCATTTACGTCCTGAGAGCCATCTCCTTTAAATTTGTCTAAT
Marker21924	CACGCTTCAAGCCCTGTATCTGGCATGGAACGGTTTTTCTAACTGTGGGTGTCGGGAGATAGGCACTGCCCTACAAACCAACAGTACA
Marker22003	GTTGACCCTCCAAAATCGTCGGATTGTCTCTTGTGTCTGTTCCAGAACGCACACTCTGTACGTGGTCTTCTGTCGCACGCGTATTCCC
Marker22007	TGCAGACGGGGCAGGAGTTGATCGACTGGTAGACAAAGTCTGCTGTACCTGCGTGGTACAGCAGACCTTCATTGTTCCGCAATTTTGA
Marker22024	ACGTTATTCCGATATGAAAGCAGTAAAATTTTCTGAAAAATTAAGACATTCATTATAACAAAATAAATAATGCCTGTTTGGGAGGATA
Marker22055	TCAAATTCATGAAAAAAACCTAACGTAACTTCAATTCCTTATTTGCAGTTTCATTTATTACATGCTCCTACAAAAGTGGAGGGGGGGG
Marker22077	AAAATCCACTGATATTCCCAAAAATTGACTGACATTGTCTGACATCCACTGTACATTGACTGTACCTCACTGTACATTTCACTGACTT
Marker22095	AGGTGTGATATCACTGCTGGTCCTGAATAGCTTACTTGTACTTGCATGTAGTATGGGTAGTCAGATACATGCCTGTGAACTAGGGGTC
Marker22098	CAAACAAAAATTTCATTATTATCTTCTTGTAGACAACACCATAAGAAACATAAGAGCAAATCCTCAGGTCAAGCCGTGTCTTTCTACA
Marker22170	TGGGATATCCCTTTATACTTCCGGATATGATTGGTGGAAACGCATACAACAGGCAACCGGAGAAAGAACTTTACATCCGATGGATGCA
Marker22329	ATTTTCCCAGATATGTTGATAGGTACAAAAATATCGTTTTCTTTTTGTTGGTTTTGTTTTGGCCCCGATGAAGACCTTTCCTTATTGG
Marker22344	TTGACAGCTATCATCATTTGCGATAACGTATAAAAGGGCGTCAGTTGACGTGTTGTACGTATAATGGAGTTGCATGATAAAAACTTGC
Marker22446	ATAGTGTAAGAATATTTTACATATATATCTCAAATACAATGGATATATCGAAGTGATTTGTCCCAACCACTTGTACTTTAAGTATTTT
Marker22453	CCCCAAACCAAAAGTGTCCCCCGGCACCGGTCCCCAGGCACGTGTAACTGAGAGCCTGAGGGAGGGTGAGCCACACTGCTGGGTGTCT
Marker22501	AGCATCTGGACAAGCACTATCGAAGCATGACGTCATCAGAACCTACGTCATCAATCAACAGAAACAACAACGCGGACACCGTTTCTTC
Marker22504	GTCGGCAAAGAAATTCCAGTTCACAATAATCTTAAACAAACATAGTTCTTGGGATCTGCGAATGCTACCTCATCATTTTATCTATAGA
Marker22541	GATCGGCTTCAGATATCCTCTTAGAACTGAAAAAAATTACATTTAATGACTTTGTTTGAATACACGTGTATAAAGATATATACGCATT
Marker22553	GGGAACAGAATTGGGCGAGACGCTGCTCTAGTCAAGACAACTTATCCCAACCTTGGCAACGTCTGCACCATGACAAAGGAGAAAACCC
Marker22562	CACTGTCTGAAACCATTCAAACAAAACTGTGTTAGTAGTGATTGATAATCTATAGTTAGATAGTCCCCCTCAAAATGCATTTAGTTAC
Marker22609	CCGCCTCGATCTGAGTACCGCCTAGAATACTTCCCCCGGTCGTTATGACCTTCGTGTCTCGTGTCACCTTGACCTCTATAATGCCCCC
Marker22683	ATGCCCATGTAAAGGTTAAGTTTATGTAGCCGGTGTCGGTAGAATAAACATTGACATATTATGTAAACATAAAAAGTAAATACATAAT
Marker22685	CTCAATCACAACTCCCTCTATTGCCTTTCGATAATACATATCGTCAAAACGCCGTTATTCACGTGTTTCAGTTCTCCCATCTTGTTTA
Marker22713	CATAATAGCCCGGTCGGCATTGGTCACACTGTTGACCCTCCACCCCAGGTCTACAAGTACACTGTCCAGTCCTCTGGTCACACTGGGA
Marker22718	ATGATAGTGTTTACAAAATATATTAGGCATATTGGACTGAAGTGGCAAATACCGGTATAAAATTTCACTGAATTTAAAGTAAAAGAAG
Marker22731	TTTTTTATCTTTTATATAAATGTATTTCTTGACTTTTCTCAAAACTACTTTAATTAATAACATTGAATGCCATACCAAATGAAGGCCC
Marker22766	CGCCTGATCAGCATGGAGTGTCCAGACTATGCCGTTGGTAATGTGCGCTTCGACTGTTTTCTTCGGATCGGCGTAGGAAGCCCGATGA
Marker22785	TTGTGCATCTATCCTCATCTAATATTTAAATAATACTCACACAATATTAATTTTCTTAAAAAACACACAAAAACAACCAAAAGCTAAN
Marker22794	TGAAGAGGATAAACTCGTATCATCAATGACCCTAATTAAATCCCCACACAATAGATTTATGATGGGCCGGAGAATTTTGTGACGCGGG
Marker22796	CCGCCTTCGTCTGCAATCAGCGACTGGTTTCCTTGGACACTGGCAATGTCCGACAGGATTATGGCAACGCGAGACTGAATGTTATCAT
Marker22875	CGTCAATGGGCGTGTCCCCAATTATACCTATCACCAACTCCTCAAGAGGCGTCAGATCAGCCGGCGGCGGTCCTCCTCCAGTCTTTTT
Marker22957	CACATAGGCGTCTCCTGGCAAATCCATAAATGGCGGACGTCTGACGGGAGGAAGTCCTTTGTTGGAGAAGGCGTTAGCTTTCACACAG
Marker23015	TCGAATGATCCTTCTCGGCTTTCGTAGATATGGACACAAGTTCACTGTGTGACCCGAGTTCTATCCCAGTGATCGACAGTGGTTGTAT
Marker23126	CTCGCATGTCTTACCCCTCCCCCCAGCATGGGCCCCGTCCAGGAGATCCCCAGAATTTTCCTAACAGCCCACCCCCAGTTCCGTCATC
Marker23127	ATCGTCGGACGTTTCCTCCTCGGAGCCCACCTCAAACTCGGTGTCCACATTGTCCTCCTCGAAACTGGAAGGCTCCGGGGTTGGGTCC
Marker23174	CAGGCATTCGTCAATGCGAGGTAAGGGATAGGCATCTTTGACTGTGACATCGTTTAGTTTGCGATAGTCAACACAAAATCTGGTGGAC
Marker23231	TCTATATTGTAAAATGACATAAGGGGACCCCTAGTCACCCTACAGTGGATGACCGGTCCCTCTCCATCGTGTAAAATGACATAAGGTT
Marker23313	CAGATTTCATTTGGATAGCAGTGACGGCCGTTGTAGGGTGTATCGTCGCGTTGGGGAGCGTTACCAGGACGCTTGTGTTGTGCAACGT
Marker23314	GTTTTCAGACAGCAAGTTTGACTGCCCGTAGCATTCCAGGGCTTCGACCAATTAGTCCAAGAACTGTGCGTAATCGTCTGCGCGAGCA
Marker23390	TTTATAAAACCTTTCACATACCTTGTGCAGACCTTGCTGTCAGGACGTCCTCGTCCTCAGTGTCTCTAGCTACAGTTAAAACAAGAAG
Marker23397	TGCACCCCTTGTACGAGGCAACATTCTTAGTCTGGATTGATCGACGTTATTTTGACGCAAAATATCACCATTACTAGCACGTAATCCA
Marker23405	CATTTCCCTGAGAAAAATCCGCTCCCACAGCGCCCGATTATCTCCCCTACCATATAGATGGACACCAAGAGAGCGGCGTCGTCACTGG
Marker23414	TTTTAAAATTTGGTTTATGAGCTTTAAATTCCTGGTATCTCTAATTTATCTAAGGAATTTTTATTGGCTATCAAATTGGCCAGAAGCC
Marker23418	CGGTGGGACACCAGTCGACGAACTGGATGGTCCTCTTGGTCTTGATGGTGGCGATGGCGGCGTTGACGTCCTTGGGGACAACGTCTCC
Marker23421	CGGTGGGACACCAGTCGACGAACTGGATGGTCCTCTTGGTCTTGATGGTGGCGATGGCAGCGTTGACGTCCTTGGGGACAACGTCTCC
Marker23424	AATGTAGCCATAACCAGAGCGCGGCGCCACCTAGCAGTGGTGTGTGATAGTGAGACAGTGGGGCACGACGCCTTCCTCAAATCTCTAG
Marker23437	GAGCAGGAGGTAAACAAAAAAACAAATTTGTTTATATTCCTGAAATTCTGCCACACAGTTTCTCTTTGCTAAAGAGAGAGAGAAATTT
Marker23465	AAAGTGAAATTAGATAAGCATGAATATGAAAACAATAAAGTAACATGCAAGTCTAAATGTACTGAAGAATAAAGAAGTAAGCATAATA
Marker23499	GTTTAGTCGATAAACGTTTATGTGTAATCAAAACTAAAACAATTCTTGAGTTGGCGGCTAAATAAACTCGTATATGAGAGACGCAACT
Marker23555	ATTGCAAAAAAAGAGAAAAGAAATCAACAACAACAACAACATGAAGATAATTTCTTCAGTGAACAATATTACTCACCATTTTCCCTGA
Marker23627	ATTATACACTAAAATTCTTATTACAGAATGACCTCCTCAATATCATCATCGTAATGGTCAACCGCCGTCACGGCTGGGCGAGCTTGAA
Marker23633	GAGTGTGCAATTTGTGTTGAATATTGCTTAGGCGCCCCTTATCGGCCACTGCCTGGCTTCCTGCGCTGGGTCGCGCGCTATTTTTGGT
Marker23637	AGGGATCAATTTGATCAGGAAAACCAAGACATGCAAACTTAACAGATGGTAAAAGTCGCGCACCCCCATACAATGGGTCAGCACAGAT
Marker23678	CTCAATCACAACTCCCTCTATTGCCTTTCGATAATACATATCGTCAAAACGCCGTTATTCACGTGTTTCAGTTCTCCCATCTTGTTTA
Marker23725	ATTCAAAGAAGTGTTATTTTTAATTGATCAGAACCAACATCATTGTAATGTAACATCAAGTACCGCACTGGCATGAAACAAAAGAAGT
Marker23745	AAACGTTTGAAGTCCACTGAAAGTCATGGAAATGGAAATCTGCTGGTGGTAGCCGAACCCTATGCTGATGGGCTTGACCTGGGTGGCT
Marker23774	GACCGGTGAAGTATTTCTCCTTCAGATGGCACAATAGTATCGGGCAAAACAGAACAAGGCCGACATCTGCATGATCCCGCCATGTTGA
Marker23881	TCTAGTTTGATGCTCTACCAACTGAGCTATCTTGCACTGGTATTCAAACCAGTTTGACCATCATATTCCTCCCCCTTAAATGAACCNN
Marker23905	CCTGATATTTTCTCTCTCTGTGGACTTGATGATTGGGCATTATGGGTAGGTGTAGGGGCCACTGAACATATAGAACTTGGTGGTGCTT
Marker24031	AGTAGTTCTTGAGAAGAAGATTTTTTAAAATGCACCCCCCTTTTTCTACAGTTTCAAGGTTTTCTCCGCTTTGAATACAGATCGGACT
Marker24049	CCTGGGCGTTCGGTGTCCGCTTGAGGCTGTTGTACGGGTTGTTCTGATCGCTTCCTCCGGTCAAGTTTCCGTCGTCTGTGCTAATTTC
Marker24091	ATTTTTGTGAACAACTGTGTAACATTATTATCGTAGCTTCACGGCAATGCATCCCCCATTCAGGTTATAACACTCACACTCGACCAGG
Marker24127	CTCAATCACAACTCCCTCTATTGCCTTTCGATAATACATATCGTCAAAACGCCGTTATTCACGTGTTTCAGTTCTCCCATCTTGTTTA
Marker24156	CTTCATCACTTGGTTTATTTCTCTGGAACTGTATACTGGTGGACCTTTGGGAATACGGCAAACCTACCCTTCGTTATTACCCTACGGC
Marker24324	CGGTCTCAAAAGAGGCGATATAAGCACCGATTTCCGGCGCCAGGGCGCTGAGTTGACCCTTCCATACATTATTGTAGGGTCTCTATAC
Marker24327	CGGTCTCAAAAGAGGCGATATAAGCACCGATTTCCGGCGCCAGGGCGCTGAGTTGACCCTTCCATACATTATTGTAGGGTCTCTATAC
Marker24364	AAGCATCACTTTCGATCTTTTCACAGTATCACCAACAGCAAGGTTAAGTGCATGTCCATAGCAGTGTGGCCCGAGGTTCTTGTTTGGT
Marker24395	TCTACATAGAGAAAATGGTTGATTTAAGTCGTAAAGCCTATAATTGTGATACTTTGTGATAATTTTTTTTGNTGATTTTCAGACTATG
Marker24402	CTGGTCGACAAACACAGACAGGAGTGGCCTCGTGAAAGGAGCAGTAAGATACCGTGTGGTTACAGCTGTGTTGTGCCGTCACACAGTC
Marker24448	GTGTTCCCCGACCTCCTGGGTGGGTTCCTCGGGGTGGGTCGTTATGGCGCCATAGTCGGTCAACTTTAGCACCCACCGACTGTCTATC
Marker24513	CAGAGCCAGCTGTAAGTTATACACTCAAACCTGGAGCTCGATCTTACTGTATTGTACATAACACACTGCAGCTATCAGTGGCTGCGGT
Marker24565	TGTGAAGACGGAGTAATTCCAACCTATAACCCCCGCGAGGCGCCTTATCCCGCGGGTCAGGAAACTGGTAGTGGGATCCATTCGGGTG
Marker24639	AATAACTTAATTAGTATTAAGAATATTGATAAAAAGCTCATGGGAATGTCAAACAAGCATTGGGATGGCGTTTCGTGTCGGTCAGTGG
Marker24662	AGGCTTCAGACGAAGGCGACTTCAAGAACTCCATGCTGTGTCTGGCTCCCTCCAACACAAACGTCTCCGCGCTGAGTGACACCGAGAA
Marker24725	CCGCCCGCTGTAATATCCTGGTCTGTACTACAAGCGATCGATTTTCCGCTAAACTAAAACGGCGCCAAATGGTTTCCAGAGTATCAGC
Marker24743	CCTTGCCACAGAAGTCACAGAGCCAGGCCTTCTCCTCCGTGTGTATCTTCTCATGCTCCTTCATGGTGTAGTAATACTTGAACAGCTT
Marker24759	ATGTCAGCTTTAATCATAGTCCTTCGCAAATTGTTTAGAAGTAACTATGTTTCAATTACAATGTACCTTTTCATAAAAATCAAAACAA
Marker24794	ATTGGCCAAGTATTGTATGCGGCGCCATCTCCTACGGCAATACAAATCTGGCGTCTGGAACTCACCAGGTGGTGGTAAGACAACCTTA
Marker24801	TCCACATCCGGGGATACCCGCATCCTGTCCCAAACTGGATGCGCAGTGTCCTACTGGTGGTGTCACGTGTGCTCTGTATAACTGTCAA
Marker24806	AGAATTTAAGCTAAGTGGGACGACACCCCTTAAACGGGGCGTGCAGATTTTAGTCTTTTCTTATAGAGCTATGAATTAAGTAAACCTT
Marker24841	TCCGCCATATTGTTATGTTGCTTTGACAGAGGACGGAGTATGGATGACTTGGTCCTTGTGGGGAGACTGTACGGTGACGTGCGGGGGC
Marker24873	TGTATCCCCCGGTAGAGCCTTGGGTAGAGGGCCTCTTACGGAAGGTGTCCAAAGATGCCATATACCCCTCATCCACAGGCCCCGGGCG
Marker24903	ATCATAATCCAAATCACTTGCAGTTCTTTGCTTTTCGTTTGTTGTATGCAAATCCACGGGAATGGTCACTTCTAAATCTTTTTGTACT
Marker24904	GTGAAATCTATCAATGATCAAAGTGAAATTCGCAGAGATGATGAAGGGAACAAAATCAAAGAAAACGGACGATTAAGCCCCATATTCG
Marker24926	TCGTTTGTAACATTGGCTATCGATCACACTCTGTGATTGGGTTGTTAACTGAAACCCTGGAATGTCTCTCCTGCTCTCTTTTTATCTT
Marker24927	TGTACCCTTTGTTTGGTGTCTTCCCTTGTCCAAATGACATTCTATCACTGTAGCTGACTGGTTTTTGGTAGTCCATAGAAGGCCTCCC
Marker24984	GCGTGCCGGTCAGAAACTCATTGAGATCGCTCTTGGCGCAGTAGACGAAGCAGTCCAAAGGGTTAAGACGTACTAACTCAGCAGAGAA
Marker25017	TACACTACCTGAGGATGCTTCCACACAAGTTTCAGCTTTCCTGGCAGATTAGTTTCTGAGATGAAGATCTTAAAAATTAACTCTGTAA
Marker25095	CTATGGGTACAATATTGGTACAAGGCGGCCCTCGAACAATGCCCGAGAGACCACGGGCCGTGATCGCCACATCTGCCTCCGGAAATGA
Marker25107	ATGCCATTTAGTTCTGATGTTTGCACATCTTTTCTATGTTTTCTAACAACTATATAGGATCTTTTTTGTAGACTGGACTACTAAGACT
Marker25110	CAGACTGCTGAGGGGGAATACCCACCCCTCCTGCTGGCCTTGGCAAGTTGACATAACCTGACCTACTAGTATCTGGGGTTGTCTGATT
Marker25114	GCTGAATTTGAGGAGCGACTTGAGAAATTCATTACAGACAAAGCTGAGATGGAGAGCCAGCTTAAGGAATACGAGGATCGTCTTCTTG
Marker25117	GATCATGACAAAACTTATACATAAATTTATATTTGCAGACCGATCTTGAGGAGATGAACAATGAAATCAGAGCTGCTGATGACAAGGC
Marker25138	AGAATTGGACAATGAACAAATACCTGGAACTAGGGGCACCCCCCGAAAAGCTGGTTATGGGCATCCATGGCGCGGGAAGCAGCTTCAC
Marker25158	ATATTTAACTTCTGTTACCGAATATTGGCGAGGTTAAGTGTATGAATTTCTGGTCACCCCGAGTAACGTGTCACGTGTCCAAAAGTCC
Marker25197	TTTTATATCTTCTTGTAATTCTATTATTTTTCTTTCCATGATGCTGAAAATGTCAATTAAGTTATGGTTTTGATGATTTCCATTTGTT
Marker25205	TCATGTCAGGTGCTCTACCAACTAAGCTATCTGGCGCTGGTATTCGAACCGGTCTGACCGTCACATTCCTCCCCCCTTAAATGATCTT
Marker25226	GGTATTTTAGTAACTTCTATCAAGATGTTAAAAAGCTTTTTTTTTTCAAGATTAGATTTGTCCGTCTTTTTCCCCCATGCCTCATGTN
Marker25227	ACATCAACGTCACAGTCCTATGCTGTAAAGACTTAGGAGGCCCACCCGTCGGGTCACGTGCTCCTGACCACGGTCACGTGCTATCGTT
Marker25236	TGACGCCAGTGATCAGCTAGAGACATTCTACGCGGAGATCTCCACCCCGCTACTGGTGGATGTCAATGTAAAGTACACCCCTACTGTC
Marker25246	ATAGAGCGCAGATAAAAACCGGAAAAATGTGGAAATACGATCAAAGTGCAATTAAATCATTTACTAATGAACCGTTTTGTTTCACTAA
Marker25296	GTCATATTTCTCTCCTTCACCCTGTCCCTCGTAGGTCTCTCCTCCCTGGTCTTTGAAGCTCATACTCATCAAAGGGACAGGTCCTCCC
Marker25342	ACGTTATTCCTATATAAAAGCAGTAAAATTTTCTTAAAAATTTTTAAAAAGACATTCAGTATAACAAAATAAATAGTGCCTGTTTGGG
Marker25349	GTTCTCGGTCTTGGTGACGATGCAGACGACCACGTGACTGGCTGGAATGATGACACCACAGATGACGGCGAGTAGGGTCCTTAGGGGC
Marker25389	AGTGGCATGCAGCGTTGGAAAGTTGACCCCACAGTCACTAAACGGCCGAGTGACAAGTGTTGGACGCGAACGACTGTATGATAGTCCC
Marker25393	TTAGAGCTTTAAGCAAATTTTGACCATTATACGAAGCCTTTGGTCGGCAATCTTGGACTTACCAGTTCTACACGGCCGAACCCACCCA
Marker25409	CCTCCCGGCGGCGGGAAAACCGACAGCCAGCCGACCCCAGTCAGCGCACGCCTACGATGGAGGGGTGTTTTCTCCGACGGGTCCGAAA
Marker25413	CTGTTAACGAACAAAGACTATTCGTTAAGTAAACTGGAAAATATCCACAATCCCAGGAAAGGAATGCATGTCGGTTGCCCAACTCCAA
Marker25425	ACAGATGAGGCCTTGGCAAGGCGAGCTCTGCAGGCCACAGGTGGGGACCTACAGGCAGCGCTCGACATGCTGTTTGGCGATGGACAAT
Marker25452	TTTTCCAAGCACCACTTCATTGTACATGCACTCTGATACACATACCTGTGTTTCAAATTTTAATAATCACATGGATTAGTAATAGAAA
Marker25511	TTGGATTAGTTTGAGTTATGTGTGGGGTGATGTAACAGGGTCTTGTGTGTGGCTGTTTGTAATATAATGTCATGAGGTGATGTCTATT
Marker25516	TCCTCGCTGGTGGTGGAGGTGGAAGTGGTCCTAGCCTATCCCAGTAGGCAGCGCGATCTAACAGGAAGTTGAGACCGTCTTCCGCCAT
Marker25535	CGGAGAGGGCCATGTAGTTTACTATCGCATCAATCATTGCACTATCGATTTTGCATCGATATGCGATGGTGCGATGACGATGAAGCAA
Marker25537	CTTCCTTTGGCTGACGTAAGAGGGCGTGTCTGAGGTGGTTTCCTTGAGTGGTTCAAAGTTGGGTGGTCTTGGTTGACAGAGTACTTGT
Marker25552	ACTAATTATAGTACATAACATGCAGTACATTTCATCAATTGGTTATATTATTTTTACGCGCAGTGAGTTGGCGCTGCCTGTGGCGCTG
Marker25564	AAAGCCAAAAATATCTGCTTTGAATTTGAGGAGGCTAGATATTCAACAAGTTCCTGATTTAATCTATCTGAAAATTTAAGGAATGCTT
Marker25658	ACAGTGCACGCATTGTGAACAGCTAACGTGAATGAAGTGGAGCGAAGTGGGGAACACACGGTCAACGTACTGTGGGCGCTGGGTGAAC
Marker25679	GTACGGGGACAGCATACACTGTTGTCAGACGATGCTACAGACCTGGGCCCACAGTAAGCGGAACACATCCCTGGGGGTGCTGCTGAAA
Marker25713	TTAGCTTGTTACGAGTACTAACGCATGTTAATAAATATATAAAAGATGTTGACTTGACACCATGCAAACACTTACGGAACACTCTGGT
Marker25714	TACACTACCTGAGGATGCTTCCAAACAAGTTTCAGCTTTCCTGGTTGATTAGATTTTTAAAGATTTACTTTATATATTCCTACGTAAA
Marker25718	CAATCTGCATAAGCCTGTTCATTAATTCGCCTGTCTTCCTATTTTTTTTACTAAAGATTGAGGAGTACATGGAACAGCTTCCGAACCA
Marker25738	AGGAGTGGTACCTTCTGGGACAGCGGTAGAGTTCTTGATCCAGGTTGAAATTCATTCCAGGTTCAACTCCACGCTGACCATTGATGTG
Marker25744	TGCCTGTTCCTTCAGTTAGTGAATTTAACATGTTTCTAACAGATTACGGCTGTACCAGTGACGGCATCACCACCTACATTAATGCCTC
Marker25770	ATGATCTATGTAGTATCTGGCGGCCTGAGCGTCCGCCCGCGATCGCCGCCACCGCCGTGGAACAGTCAACGATAAATGAGACAATTAT
Marker25773	TGCGAACAGCTTCCTGAGGTGGGTCAGTCCCAGCGCATGGTCTCTCTGGTCAGCCGAGGAGCGCCCCATAGTCCCAAGTTTCTTGATG
Marker25777	TTACAGTGAGTTCATTGATGCAGACGGCTGCCACAGGTCCTGAGTGACCTCGTAACTGTCTGACAAACTGGAGGCGACTGAGGTCCCA
Marker25802	ACATCTAGGGTGAATAGAGCCTAATTAAAATGACAAGGTTAAACCAATGTAAGAGTAATTCTTTACCCTGATGCTGAGGCATTGCCAC
Marker25835	AATCTCAGCATCTAATAGCGAGGCAGTCCGAATTAAGCCTGTTTCTTCTCTGATCATAAACAAGTTCTTGTCATTTCCAGAAATGATG
Marker25849	ACATTGGCCTGCACATTTTCCCTCACAGAGAACAGATACGGGTTGTTGCTGAATTGCGGCCCTGTCCGAGTGTCCAAGCTCTGCATCA
Marker25850	ACATTGGCCTGCACATTTTCCCTCACAGAGAACAGATACGGGTTGTTGCTGAATTGCGGCCCTGTCCGAGTGTCCAAGCTCTGCATCA
Marker25875	TCTCCTTAGATCAACATGATTGTGAAGCTGTTCGCCGCACTATTGTTGGCGGGACATCTCTCCCTGTCCAGTTCGCAGGAAAGCTCAC
Marker25908	AAGCGGAGGTCGATATTAAATTCTTATATTTGTGCAACAAATTGCCCTCCCCTCTTGTTGCTCGCGGGCACCTGCTGGTTCCCCGGAG
Marker25939	ATCTGTTTTCGTTTCTGTCAAACCAAGAATGTCAAAGCCAGATATGAAATGGTTAAACTCATCATAATTTAATTTATTTTTAATGCTA
Marker25959	GCTTGAATAATGATAATTACGCCATAAGAAGGTCCAGATGCATCATTCATACAAGTGTGGTGAAGATAGGGCAAGTAATAACTTAGAT
Marker26009	AATGTCATCGGAAGAGTTTTAATTATTACCTCTTACGTTAACTTGTTTCTAAAAGCGGAAATGCCAGTTGACCTATTCCAACATGCTC
Marker26061	CAGATTTCATTTGGATAGCAGTGACGGCCGTTGTAGGGTGTATCGTCGCGTTGGGGAGCGTTACCAGGACGCTTGTGTTGTGCAACGT
Marker26062	GTTTTCAGACAGCAAGTTTGACTGCCCGTAGCATTCCAGGGCTTCGACCAATTAGTCCAAGAACTGTGCGTAATCGTCTGCGCGAGCA
Marker26097	TTTGGGTTTATTATCTGCTGTCATTAGTCTCAGACATTTGTGAGCCGATCAAGCGCGGCTGCGTTTATGGTGGTCTTGACGTTGAAGT
Marker26117	AGTAGTTCTTGAGAAGAAGATTTTTTAAAATGCACCCCCCTTTTTCTACAGTTTCAAGGTTTTCTCCGCTTTGAATACAGATCGGACT
Marker26123	TTATCGCATCATTTTTATTTTTTTTAAAAATTGCTTTTCAGAAAATTGTCATTTTCACATTAAGGTAAAAAGTATAATGATATTTACC
Marker26131	GTTCAACTTACCATCTACTTCTACTTTGTGTCAGCGTGGTTCTTGTTGACGGCCATGTTTGTCGTCACTTGTTACGTCATCTACATCG
Marker26132	TGGAAGCATGACAACACATTGGCCTTCACAGGGAGTTCGTTTTTATACATCTTCTGCTCCCCCGTCATTTGATGACGACACAATAACC
Marker26137	AGTTGTCGGAAAAACATCAATAAAATAAATACAAACCGTAAACATGATGGAGATAGGCGGAATTAATGTCAAAAGTATGCCGTATATT
Marker26138	AGTTGTCGGAAAAACATCAATAAAATAAATACAAACCGTAAACATGATGGAGATAGGCGGAATTAATGTCAAAAGTATGCCGTATATT
Marker26174	AAAATAGGAATTTATCTCAATTGAGAAGAGAATGGAGGTCACGAGGCTCTACCTGGGGTCATTTGGCATGTGCTCTGACAGATTGGTC
Marker26206	CGCCCACAGACAACGGTATTCCCCGATATACTCGGTGCCTACTAAGTGCGTCCGCATACGTAAGGTACACTGTTGCCCCGACCATTGC
Marker26240	TCTTCGTCCGTCTGCTCGTGTCTCCGCTCTCGTGCTGACGCTCATCCGTGAAGATCGCGGGGCTTGGCGCGAGGACAGCGACGCCGCT
Marker26269	CTTATTTGCAGTTTCATTTATTGCATGCTGCTTCAAAAGTGGAGGGGGGAGCAATCCATGATATTTCCATTTATCATATAAAGTTGAG
Marker26310	AGATGACAGATTTCAGATGGGTTGTGAGGCATGTCGTCAGTCCAACACTGGGTTCTCCTGCACCCATTGCTGGGTCTGTGGGAGTGAA
Marker26341	TCTATATACAAAGTGTACGGTTATACGGTAACTAGAGATTAAGGGGGTCTGAGGGGGGACTTACCTCCGAAGGGCATGGCCTGGTCCA
Marker26506	ATCGCCTTGTTTACCCTAACAGCGTATGACAACTCCATACTGCTCCCGTCAGTGTACAATACGACGCACGGACGTAGGCACTTGACGG
Marker26521	GAAAAAAAACAATGGCTTTTTAAAAAGTGATCCTAAGCAATGGGAGAAAAGAAAACAAGATGTCATGAAGTGTGTGCATGATAAGCGC
Marker26542	ATTTGTTTGTTAGAAATGATAAAAGGAATGGTACAGGAAAAGGAATGGTACAAGTAACGCACAGTATACTGACTACATACTGACCTCG
Marker26545	TAAAACTCCGAAAGAACATTCACCACAACCTAGTACTCGCCCTCTCTATTGGAGACCTATTTCTTGGCGTGGGGGCCATTTGTACGGG
Marker26638	AAATTAACGTTGTAAAAGTATCCCCTTACTAACAAGGCGACACCGTGTGGCATTGACCCGACAGGCATAGAATGAAGTGGTAAACAAT
Marker26695	TGGACATGTACCTTTCTTTTCACTTTTGTTTGGATATTAACGTCTTTAGTCGTCCTTTCACCTGGTGCTTTTGACGTCCATAATGTCC
Marker26905	ATGCAAAATCTGTTTGATAAAAATTAAAGAAGATCTGAAAGTTTTGCTCAATACAAATCCTACAAGTTCTGTATGATACATGTCCTGA
Marker26940	ACGTTGTTTTCTCGATGGTATATACGGATTGGAACCGTCACTGGACGCACCTTTGTCCGATGATCTGTTGTTTGCGGTCGGAGCCACG
Marker26941	TCGTCTCTATCGAGTTGATCATATTCAGCGCGCCCCCTGGTGGATCTGAAAACACGGAGAAACCGGAGTTCAGGTCTTGTTGTGTTTC
Marker26956	GCGGGATAAGGGATCGGACGGTTTGTCGCGTTCTTGGAAACCAGCAGTAACTTCCGGTGAAGCTGTGGCAGCAGATTTGTGGTGCGTC
Marker26962	CCTGCACCATGGTGGCAGCGCTGTTGTCGGAGATACTGTAGCCCTCCAGGATATACTTTGTGACCACCACCTCCCACGCAAGCCACCG
Marker26997	AAGAAGACGATAGGTCAAAAATCACTCACTATGCGAATGGCCCACAATGCAGCGCGCAACATGACGTTTTTTGTCGCAGCCTTCTTCG
Marker27146	AGCGTTGGACACAGAGGACTACAATTCTGACAGTGACAACACCTGGGAGCCAGGAACATCGCCGGAGGATAGCGACGTGACATCCTTG
Marker27184	ATATGTGTATTTGTTCTTTCCAGAGGAAGATATATCACCCAATGACATCGGTCCACACAAGTCGTTCAACATTCCCGGGACGGTCAGT
Marker27195	TCAGACACCACTACACTGGCGTCTAGATGCAGCGCTCGCTCATCTTCTGGAGACAGGGCCGCCTTGTGGTAGTGGACGGAGGTCTCGC
Marker27197	ACACGGTGGTCACCATACAGCCGGTCTTCTTCTTCCCTCCCTCTTCCTCCCCCTCCCCCTTGTTCACGCTGTTCATCCTCCGCCGGGC
Marker27206	TAACTGACTGATCGGGTCACCGGTCTTCTTCACTTGGATGGCGCGGTAGATGTTCTCCGGTTCGAATGAGAAGACCTTCCTGGTGTCT
Marker27209	AAAGTTGTGAAATTCATGACCCCGGGGGGTAGGGTTGGGCCACAATGGGGTGGGGGGTCGAAGTTGTAGAAAGGAATATATAGAGTAA
Marker27249	ATTCTTTTGATCATTATGAGGTGATCAAATACTGTCAAACATGATCAAATCTATCATAAAGCCCTTCAGGCTCTATTGGATTTCATCA
Marker27301	AACTGTGAAACTGAGTTCACACACTGACTGATGCTAAAGTCATAACTACTAATAGGATTGGCTGTAGTGGATCCCAAAAAGGAGCTGC
Marker27316	GGAGAACTGGTCGTTGCTGCGCGGGTGCGCTTCTGTTCTCTTGTTAGAGCGAAGTCCGGAATAAGCCCCCGTCTCATACGCAGCAGCC
Marker27336	AGTGGATCCGCTCGCATTCGCCCACTCGGAAATGTCACACGACGCCTCGTCAAACGACAACGTTTCTGGGTCATCGTCTTTTCGGAGG
Marker27434	TTTGGCAGCATGATCAACCAGAAGCTTCAGGACTTTGAGGAGGAGGTGAAGCCGATCGGAGACATCATGACCCAGGCCACCATCGAGA
Marker27468	GAGATGCCCGGATTGCAATGAGACTATTGGTGGGGCCAGACATCAGCTTCGGTCCGACAACCAGGTGGCCGGGGAAATGGACGGCGCG
Marker27470	CGAGCAGCACCTCCCAGTCCGTACCCTGGTCAATGTTTGGATCCCTGCTGCCTTCCTCCAGGGGGCGGCCTCAGACGCCCATCATGTC
Marker27481	ATATTGATGAAAAGTTTTAAGTAAAATTCATGTAAAGAGAAGTTTGTATGAAATCACATAAAATTCACATGAGGTCACTATATCTTGT
Marker27502	TTTTATTTGGCTTATGTGATTTGGGTTTATATCTTTAGGATGTACTCTGGTCTCTGGACAAGGGCTCTGCGGTCTCACGCAGTTGCAC
Marker27517	CCAGTTTTACGAATACCGGAAAACTCTAAGCGCGCGGATGGCAGAACTTACCGCACAAGGCGTGGGGACATCTACTAGGCAGGCCGAG
Marker27524	ATACCGATGCCGTGACGTGTTGTGCAGAGGATGAAGTATTCGTACAGAGGCTGCCAAGGCGCACGTCCCATCCATCAGACACCAGCGC
Marker27532	AAATTCAATATGTCTGACCAAGTAAAGGCGCTGAATATGGGGAATACGTACGATATATCCCTGGAGAGGTCGTGTATAACGATTGATG
Marker27538	GCATCAGCTGAGCAAAAGTGACGTTCCCACACCTTCAAATACCCGCCGGCGACCAGAGTTTGACCTGACCTGTTGATTTCTTAGTCAA
Marker27543	CTTATTCTATGCGAGTACAGTCGGACCTGCTGTTAGCCACCTTTAATCAGCGGCCACTCGCCATGAGCGGCCATTTCAATTCCACCCA
Marker27569	ATGGATGTTGACCCTTTTGTGGATGAGAATGTTCCCAGATGTGAAGATTTTGTGGATGTGTTTGCGGATGAAACGGAGAAGTTGGATA
Marker27571	TGATTGTTGAGGCCCGGACCCCCGACCTGTCACTTAAAGGTCGAATCGAGGGACCCCACTGTCCCCACCCACACGGAGGTCAGGGGGT
Marker27580	ATGCCATTTTGTTCTGATGTTTTCAAATCTTTTCTATGTTTTCTAAAAACTAATAACGGATCTTTTTTGTAGACCTGACTACTAAGAG
Marker27641	AATGACGGGATCGGTAGGGTGAGGATCTCTTACACTATAGACACTGACCTGCATGGGTTTTATGTCAACAACCTGCATTGCAAAACAA
Marker27644	ATTTACTGTTACAGTAACGACTGGATGACACATGATCATCCATGTACAATATATTACAGTTACCCTTCATTCATCTATATCTAGGAAA
Marker27657	ATGCAGTATGCAATTTCATTATATTCAAACTTATGAATACCAGTATTGTCATTGTTTCTGTGTATTATTCTGTACTGTACATGCTCCT
Marker27661	AAGTTTTATTTCAATAACGATACATTAATTTTAAGATAATTTTAGACTGAGAGGGGGGAGTGTAGTAGCACGGCGGTGAGAGGGCGCC
Marker27679	CCATAATCATGAAAATTCTAATCCGTGGGGGAGGGTATACCAATAACTCCAATCTTACCTGCCCAATCCCCCCCCCTCCCCCAATCGT
Marker27709	CATCCAAGAACCCTAGTCCCCCACTGGGATTGTAAACAAGGTAATCTGGATGATCCTCTGAATATGTTGTATGGACCCCGTATCTCAA
Marker27771	CAAAATAAATAATCCAAATTGACTATTTCTTAAATAGAAAAACACAAGAGGCCCCGCAACCATGAACGGCCACAGACAACCGGGAGGT
Marker27772	ATTCTTCTAATATTTAATGATATTATTTTGTTGTAGAACAAATGCCTACCCCCTCTGGCAGTTCCTGCTGGAACCTCCTCCAATTCGC
Marker27774	TAAAATAAATAATCCAAATTGACATTTTCTTAAATAGAAAAACGTAAGAGGCCCCGCCATTATGAGCGGCCACAGACCAGTGGGAGGC
Marker27775	AAGGAGATTGCCACAAGCATTGGTAAGATATAATTTAAACAATATACACTTATATAAAATGTAGCTTTGCAAAAATCTATTATCTTTA
Marker27793	TCCAGATATAACGTCTCCATTCTCGGCAAATGCTACACACAGAACAAACTTTGGTTTATCATGTTTCTGTAAAATATAAAACATGACA
Marker27852	GTGGTCCTCGACATCCAAATGCAAAGCAACGTCAGGCACGTCCGGCGACGGAGCCGGTGGACAGGCGGCATTTTTGTCATAGAAATAG
Marker27867	TATGTCAACTAAATGTCACTATATGATAAAAAAAAGCAAAGCTTTTATAAATAAGATGAGCAAAGAATTTCATATTCACTTATTAAAA
Marker27912	TTCAACCAAATTTTGAGAGAAGACTAACCTGGTGGATGTTAGGGACGCTGTAGGTTTTGGTGAGGGACTTAGACTTCTGGGAAGACAG
Marker27923	ACCGAAGAATTGTTCATTGTGGCAACTGACGTCATCAACGATCTACGGAAGTCGCGTGCTAGCGTCCTGATGACGGATGTTGACCCGG
Marker27930	TCTGCAGGCCTCCATGTATTCTCTGCTTGTCTCCGCGTATTCTCAACTGATCTCCATGTATTCTCAGCTGGTGTCCGCACATTCTCTA
Marker28020	TTGAAACAATAGCTCAATTAAAAAGTATGGTCCTCGGAGGAAGGTGGGGTGTCATAGTCCTCGAATGGTCGGTAATGCATGTATGTGT
Marker28060	TATTCTACAATAATATAAATCTCAAAAAGATACCAATTTGTAAAATACATAAATTAACAACATCAGATCTACATTTGTTAAGCAAAAA
Marker28123	CTAGAAAACAAAGGGTTCTTGAGAGGAGAGCTTCGGAGAAGTCGGACACTGAAATAGAAAACCAATCCTCTAGTGCTGAAGACATACC
Marker28130	CATAAACAAATGACTTTTATCGATAAAATACGAATGCAATTCATAAATGTTCTGTGCTCATCTTGCAATGAGCGATTTTCTTGAATTT
Marker28131	CACGTATTATACAGATGTGAATTTTCAGTACAGTACTGAGGACCCACCTATTGGTTTTCTTTTGAGTTTAAAAATTTAACTTTCAATA
Marker28180	CACGGCGAGCGTTGTCGGAGATAACTTAGTGTTATAGTAAATGTACACGTCCACGAACCGGAGGAATTTACCGTCCTTCGATAGCATG
Marker28183	TTTATTTTTCAGGGCAGCACAAAAACTTGGAAAGAAGAAAAAGAGGCACCAGCAACAGGAGCCCGACCTACCGCTGTACCCCACCAAA
Marker28194	AGCTACAAACAGTTTGTCGCTTTTATCCAGAGAAATTCCGTATGGGTTTTCTATTCTGCAGTTGTCTATACAACGGAGAAAGCTTCCG
Marker28211	CTCTGTCTACTGTGTTTGCCCAGTACAACAACTGTCCCCAGCACCGTGGAATAGTACTCAGCCTGTGTGCCACCCTCCAGATCATCAC
Marker28216	AGTAGTTCTTGAGAAGAAGATTTTTTAAAATGCACCCCCCTTTTTCTACAGTTTCAAGGTTTTCTCCGCTTTGAATACAGATCGGACT
Marker28234	GAAAATGTTGGTGTTGGCCGGTCACCTCATTACACAGTCCCTCCGCCCGCCGGCTTATCCTCGTTGCTGCAGGTTTTGACCACGCAGG
Marker28235	GTCGAACTTGACAGAAAAAGTAAATGTCATGTCCAAGGAAATACCCGACAGTGTGCATTACATATTTGGTGTCATCTACATGCTGCTG
Marker28273	TAAACAGTGGAGGTTTGGGAAATAACCGTTTATGATACAAAGTCTTAGTGGGAAGAAAGACCGGATGTGAAATGTGAAATTGTGGCAA
Marker28322	ACTACAGGACTTCCTTCAATCGGCCACTCAGGAACTGATGTGGCTCAACGAGCGAGAGGATCTCGAGATCAGCCGAGACTGGAGCTCA
Marker28330	CCCAGTAATGTGTCAGTTTCCCCGGAAGTGGTGGCTGTTTTGGGTATGTCTGATGACGGTTCCCGCCACGAGCCGCACATGGTGTGTG
Marker28342	TTTGTTGAGCTGAGAAAATTACGGCGATCTGTTTTCAATTACTTTCTTAAATTTTGGTTTGTTTCTTCATATAACAAAACAAATGTTG
Marker28383	CGTAATATAGGCTGATATTTAGACCTAGCCACACACCTGTATTGACTGGGCGGGAACAGCAATGTCCCCCCTGACACGACCACATGGC
Marker28384	AGCAGGGGCAGGTTTCAGCTTAACTGGACAGCCTGCAGCTGCTACTAAGCCAGTGGGAATTTCCCTGGGTACCACCCAGGCCACCAGT
Marker28436	CTATTCAAGTAAGTGCTTGCCAGAGAAAAGGAAATCCCCTTCATGCGCGGATCCAGAAAAGTTTTTCAGGGGGGNATCCAACTGTTAT
Marker28437	TTGAGCACATCTTATAGACAGAAATCCTTACTGTTTGCGTTTGTCAGTACTAAGCAGTCGTTTGTACTGTTCGTGGGCAGCATACTGT
Marker28445	TTATAAAAGTACTCTCGCTTCTTGTCGAATTAAAAACGCTCCGTCCATGTTTAACCACCGGGCATAACCAATTTCAAATCTCTTCACG
Marker28459	CATGCATTTTAGCAGAAGAAAAAAATAAGCGTTGGCCAAAATAAGACAAAAAGCCAAATGAATGTTTGGATCAAAAATGAATGCAAAA
Marker28476	TTTGATATCGGAGATCCAGCATGGAATATTACGATGACGAGCTGAATACGTAACCAGTCGATCATTTAGCTGATGATTTAATGTCGTT
Marker28557	AAAGTTTGATAAATACACATTGAGATATCCATATAAGTTACATGTATATGGATACATCACGCATCAGCAGGTCTCACCTGTAAATAGT
Marker28684	TACCTAACACCAGCACCATTTTCCACTTATGCTCCAAATGCAAGACCCACACCAGGACCGGGTATGACGTACGCTCCAAATGTGTTTC
Marker28690	ATCAAAAGCACAGTGAACAACTTACAAATAGCTCCAGATAAAACACATGTGAGTGTTGTGACGTTTAGCAATGGCGTATACAACCAGT
Marker28737	CCCCCGAGGTAGCCCCTGCTCCAGCCCAGCCGACTGAGGGACCTCCCTCAACCCCCACCATTCTCCCTGCTACACCCACAGTCCTTAC
Marker28771	CGTCCGTCTGTCTGTCTGTATGCCGGCCCCGTATGCCATCCTCGAGGCCGGGACGGTCTTGGTGGGCTTCGTGGCCAGTTTATTTCTG
Marker28784	AGTGTGAAAGATGTGGCTAAACAACTGTGTAAAAGTGAGCGATGGGTAACAAGGTGGAGACGCAGGCGAGAGCAAAATAAACAGCTCA
Marker28785	TTCAAAATATCTGTTTCATGTTCCGAACCGTCAAGACGATGTTGTGTGGGGGTCCCAGTCAGATGAGGTACCCAACGTCAGCTGCGTC
Marker28828	AGCGTTAACGCACTCTGTCCATCGCCATTGTACACGTCCACGTGAGCCCCATGTCCCAGGAGACAGGCGAGGATCCCCTCATTCTGAA
Marker28854	ATTATTAAAACTGAAAGAAACTTTAACATATCTTGACAAAGGATGTAAATAAGTGTAAAATAAAATTCCATTATCGTATTTTCAAAGA
Marker28885	TGTTGAGCCATCATCCATTAGTTCTCATTTTGACAAACCTTCAGACCATCAAACCTGTGAAAACAAAGATTACATCTCAAAAGCTCAG
Marker28887	CTCAGTTCGGAAGTCCCAGAAATTTTCCAGTCCCTCATTCCACGCCCCCTCAGTCACCCATTGTGTATGGCACAGCCCCTGTCCCTAG
Marker28910	TACAGTAGTTATATTTGACCTGTGTAAGTCCTGACTGGAAGTCCTCCACCTGCGATAGATCCTCCCACGGTTTGAAATGTCCGATGTT
Marker28960	ATGCAGTATGCAATTTCATTATATTCAAACTTATGAATACCAGTATTGTCATTGTTTCTGTGTATTATTCTGTACTGTACATGCTCCT
Marker28988	CTGCTTATGTTCCTGATGAAATGGAGGTTAGTTCTCCCTCTCTCTATTTACAACACATTGTATCTGCATTTCCTTTATCTACTTTGTG
Marker29019	TGATTGGCTGGCCTAGCTTCGTCGTCACAGCTGCTCTCTCCATCTACGTCAGCAGCGTTGTTGTTTTGGGTACCCCCACGGGAAGAAG
Marker29038	ACATACACATGTATCAACACATGAATTATGTAAGCAGATTTCAAATAAATACTTGAAATGACAGTAGTTTCTCTATAAGAAATTAAGC
Marker29089	CAAGCTAACACCATCGAGTGAACATGTGCTCTTTTTAGATCTTGGAAAATCCACAACATTCGATAATGACGGAGATGACGAAAAATGC
Marker29090	AATAAAAGTGACAAAGTCCACGGAGAGATATCCAATAATGCCCCTGGACTTGCAAGCCTCTGCCACTTTTTTGCAGGCTGCATTGAGG
Marker29104	GAACATGCCCACGAGCCCATCGTATCGCCCACCACCTGCCACACTGCCAACACTCACGCTCTCATCCCCATCAGCACCAGCCTTGGGA
Marker29123	CTCTTACATTAAATTTTGTCATTTTTAGCAAATAACGTGGTTTTCCAGAACGTTTATCTCTGCAATATGTTCATCTAATTCTTGTGAA
Marker29142	AGTGTTTTTCTTGGATGTTGAACAGCCTTACACGACCCAATGTGACGCTGGAGGAAATAAACCAGCAACACACACGTCGTTTCTACGG
Marker29174	TGTGATGGAGCAAGATCCCCGTCCCCCTGACATATAACACGACCAGCCACGGGTCACTCCTCCAGGGCCTTCATCACTTCCATCATAT
Marker29182	AATTTTCTGTGGAATAATCTGTTTGGCTGTTTGCAGGGTAAGCCCCTGGGCGGTGGACACAGAGGTCGGTGAAGCCTGTGTTAAGATC
Marker29197	GTCAGGAGGAAGCGTTCGTTGAACTGGAACGCGCACGGATACTGCTGCATGACCTGCCAGGTGGCCTCCACAAACTGTGTGAACACCG
Marker29201	ATGGGGAACTGGAAGAGCTGTGGCTCGTATTCCCCGTGTTAGGGGAGGTGGCACCCACAGGTCTGGCCAGGGAGCCTTTGGAAACATG
Marker29271	AGCAAACTAAGAAGAGATTTAATAATTTAAAGGCTTGGAGTTCATACGAAAGAATAGTTATAGTACCTTGGATCCAGGCGTGGTCATG
Marker29316	AAAATCCACTGATATTCCCAAAAATTGACTGACATTGTCTGACATCCACTGTACATTGACTGTACCTCACTGTACATTTCACTGACTT
Marker29321	TATTAACAACATAACAAAGGCATTCTTAAACATTAATCAGGTGGTCAAGGAGAAATCCAGCATCAAGACCCTAAAGAAGTTTGCAGAG
Marker29365	CAAATTCAGGCAAATCTTAAACAAAATATGTGCAACGAGGTTCCAATTTCAAAATGCTACATTGTGTTCAAAGATGGTCCTCCGTCTT
Marker29397	CCAACATGATGCCACACAATAACATGATGGGGATGCCCCAAGGTGGGAACATGGCCATGTCACAAAACAACATGGGCATGCCAGGTAG
Marker29494	CTCAAGGCCCAGGGTCAAGTTTCGTGCCCCCAGACCTTTCAAGTTGGGATCAGTCTTCTTGGGGATACCAAAATGACCAAATGGCTAT
Marker29505	TGTTCGCTATCGAGAGGAGGGGGGTTCCCTTCCCTCCTGCACACCCACGGTTCCGCCAGCCCAAAGGTGGCTCTTTCGTGAAACATGT
Marker29526	AGAGGATTTTGAAGGTAAAATCTATTTAGGGTTTAAAATACAGTTGCAATGATATTTGCAATTGTATGTAACTTGTCATCAAATATGT
Marker29544	ATTAATTTTGGACAATTTGCATTTTTCCCTTTGCTGTGTCAGTATGTATAATATAGCCTTGCTTTAAGGAGTACAGTGATATGAAGTA
Marker29546	AGAAGCTAACAGGGTCCAAGATAAAGCTGACATCTCTTCCTGCCTCTGGACCAAGAAATTAGAAATTAATATCCTGGTATAGATTTAG
Marker29552	TGGGAAACCTGTGCTAAGACATTCCCCTGTATCGCTGGAAAGTTTTGCTGATGATCTGTTGTTTGATGGGGGTCCTGGTCCCTCCTCT
Marker29553	CTCCTCAGGGATGAGAGCCAGCACAGCCAGTAACATACTAATGAACATCCCACTGACAGCGCCATCTGTGTTCCAGCCTGGAAACATC
Marker29570	GAGGCACAGAGAGGAAGAAGAAAGATTGCAGAGATTTCTGCTGGAGGAAAGAGAAAAAGAGATGCGGAAACTTGACGACACAATTTCC
Marker29667	TTATCTTTATTTTATCTGCCAATACTCTTCATGATAAATTTAATATTGGAAAATTATATAAATCATGTTTTGCACAACTGAATACCAA
Marker29779	ACCTTCATTTTCTATATAAACAAGCCATAATTAAAATCTTTCAGGGTAAAAAATATACATGTTAAACCATAATGGAACCAATGATTAC
Marker29791	CCTGTGTAAACAGGCTGTGGAGGTCGTACAGAGGCTGCGGGTCAAGTCGGCATTCCGCGCGTGGAGAGAACTGTACCATAGGGAGACT
Marker29802	CTCCTCACTGTCCAGAAAGTTCAGCCTCCTCCTGACCACCTGACGCACGGAGGGGTGGGGTGCACCCCGAGCCTCGGGGACCCCCATT
Marker29813	TACAGTAATCAGATCAACTCCAAGTTTTATCCTTTTGATCACTATCTTGATAACTTACCCACAATGCTTCATGTTCTGCAGTTTATCC
Marker29859	AACAGGTAATGTAAGAGAACTTGCTGTGAAATGCTTGTTTGTGCGGTGATCTGACAATCTTGTTTTTCGTTACAGATGGAGTACCCAG
Marker29885	CCTCTTCCTCATCGTCGTCGTACCTTTGGGACTGGTTAGACGGATCTTCGCTGATGCTGTCGTCGTGCGGCACGGTGCTCCGTCCTCG
Marker29887	TGATGCTGTGTTTAAAAACATGATAGACAGAAGGAAAAAACTGTTTATATCAGTATGAGCATGTAATAGACTGCTACAAAAAATAGAT
Marker29967	GGCGATGTTCTGGTAAAATAATGTCGTTTTCGTGAAGACCTTTATTTGCGATATCCAACTTCCTCTCATCACACATACGTCACGTGCA
Marker29968	ATCGCAGCACTCATCTCTGGGACAGAGCGCGAGACTTTCTTCCCTTCCGGTTCCTGAACAACAGCAAAACTTCCGGTAACATGTACAT
Marker29969	ATCGCAGCACTCATCTCTGGGACAGAGCGCGAGACTTTCTTCCCTTCCGGTTCCTGAACAACAGCAAAACTTCCGGTAACATGTACAT
Marker29978	GGATGCAAGGACGTCTGTATTCAGAAAAGAACTCCCGTTCTAGGCGCTTACTTGACTATTGAGGACCATAACGGCATGAACGGGACAT
Marker30014	CATTCAATTCTCTCAGCCTGCATGTTAAAATATGAAGACGAGGGTGCTTCTTGCAGACAAAGGGCGTCTAAAGCGCGGGGAAATGCGG
Marker30034	TTAAAATGATTTCATTTCTCAGAAAAGGCCACTTTATTTCACTTGTCTTAAAAGTGAAAATAATCCTGAATTATTAATGACTAAATAT
Marker30037	CATGAAGTTTGCGCATGCGCCCGATGGCTTCACCGTCGTACATTCTTGGCGTTTCCTGAGACATTGACGAGACTTTGACGAGACGTTG
Marker30071	GTGTATAAAATGCTTTTTTATTTATAATGACTTCAAGACTTAAGTATTTATGTTGTCTTAAAGGTGGAGGGCGTAAGATTGTTAAAAT
Marker30099	GTCCTCGCGGTTCAAGGTCACTAGCCCAGCCCCGCGGGAGGTGGTACCCCCCAGAGACAGCTTGGTGATGCGGTTCCCCTGGGAGTGG
Marker30102	AAAGTCTTATGACACATTATTTAGGTAAGGTCTTGTATATAAACACAATTTGCACAACCAGTACGCTCTGTTTCCATCGCGTCGTCAG
Marker30163	ATCGAACAGCGTGTCGGTGAGGTATACGTGTTCGGTGTGTTTATCGTGGAGGTTGTAATCAGTCGTGTTAGTTCGCCTCGAATACTCG
Marker30164	TTTGGTAGTCGTTTTCTAGAGCAGCGAGGTCAGGATTAAGGGTGGGCTCAATGTTTAGTGGAGGTAGAGCAGGAGGCTGATTGGCTGC
Marker30190	TCTCGTCGAAAACCACGGACCGTCCTCAGACGGACAGTGCCGTGGATGTTAGTGAGTTAGACAATAGCTTCGGTCCTCTGGACAGAAA
Marker30273	TTTGTTTTCGAGCCTCTGCAGTACGAAGGCGGGATTGTCAATGGTACACATGATCTCTCCATTTTTCCCCGTATCCGGATCATCGACA
Marker30280	AAGAGATAGTTCCAGTATTGAAGTATAAATGATGACATCAGATTGATAGATTTGTCCTGTAATTAGGTATGAGTTGTTAGACAGCAGA
Marker30290	TTGTAAACTTTCAACAAACTATGGTCTTTTCCTCATCGAAAGGAAACATGTTTTCAGCAGAGAAGACTTGGCAAGCCTTACTTTTGTA
Marker30336	CCGCGAAAAACTAATGGCTGAGAGACAGATGATCGACAAACAGACACGGGACATGAAAGATAAGTACAGCGCCCTCTACAGAGAAATC
Marker30339	CCGCGAAAAACTAATGGCTGAGAGACAGATGATCGACAAACAGACACGGGACATGAAAGATAAGTACAGCGCCCTCTACAGAGAAATC
Marker30342	AGCTATACATTTATTTTCACAATTATTTACCTATTTAATATTCTTTGAACCATTGGAGAAATTTGTTATAATATTTTAGAATGAAGAT
Marker30348	TCCGTCCACACGTCTCACATTGCTTCTTCAGGTGCTCGGAGCGTCGGAGATGTTTGACGATCATGTGAAGATTGAGCGTCTTCTTCAC
Marker30371	TATTTCTCTTTAATGAAGTGGAAATGCTTGACTTAGCGAAGCAAGGTGTAAACCCGGCAAGGCGCGCGCGCTCCCAGATGGTCATAGC
Marker30375	ATGCTAACAGAATAACTCATAACTTTATTTGTGCTTTCGCAGGTAATCATAGTCTCCTTCAAGCTGAATTTCATCTTGTGAGAGACAT
Marker30380	GCAATGCAAGAGTTCTTGGCACATCTGTTGAAAAAAGGGAGAAAGTCGTTAAAAAAGAGCCGCGGGTGCAATAAAGAATAACTTCTAT
Marker30387	TAGTGACAAGGCAAATTTGAAACCATGCTCAATGAATAATGTTGTAAATTTACAATTAGGCCTACATGATTACACACTTTGAAGTGAA
Marker30390	GATATCAACCTGTGAAGGAATTTATGCAAATAATCTCAGCATGCACGACCTCTTTCCCCCGACACTCGTGTGTTTAATCAGGCGTGGC
Marker30398	GTGTTCGGATTGGCTTTCCGGTACGGCTGCGGAGTTATCGCTCTCCTTTGGATCGCGGAAGCAGCGACTGATGTCGCACCGTCCGCTG
Marker30400	CGTTCTTGAAAGAAAGTCGGTGTACGAAGGCGGACCCGAATACGGGGGAGGGATCTGGGAACAGCTGGCACCCGCCTCAGTCCGCCGC
Marker30427	CCTAATGGTGAGTTTCAATTAATTAAAATAGTCAAGCAAAGAACTATGTTGAATAGTTCTACACTCTCTTACCAGTGTAGCGACCATT
Marker30443	CCATGCACTGCGCTCGCTCACCATGTGTAACAGTGCTCAGATCTCGGACCTGGGCTTGGACCAGCTGGCTCGGAGCTGTTGTAACCTG
Marker30445	AGATACTTTTTCTTCATCATGTTCATAATGAAAGGGTTTTTTCACATTCTATTGTTTATAATGTCCATATTTGCTTTAGTGCATGGAA
Marker30463	CTTCGCATCATCTGTGTTGATTGGTAATGGAATTTCCGGAAGGATTGGTGCTGGCACCACTGGCTCATCCTCCCTCAGCGGCTCTGGG
Marker30469	TTAATTTGCCTGCAATGTATTCAACTGTTCTTGCGTATCTTGTGTTCGGCAATGCCTCTTCCACTGTTTCATCCATTTCGTTCTTGTA
Marker30513	ACTTGGTTACGTAATCGAACAATTATCTTTGCTTTTGACCAGCCTTAGCAGATGTGTTTCTGTGACGTAATTTGTTTGTTTATTAATT
Marker30522	TTGTTCTTAAATGCAAAACAAGCTACACTGAATTTACCCAAGACCTGCTATTTGTTTTTTTAAAAGAAGATATTTTACACTGCATAAA
Marker30525	ATTTTTGCTGCGGAGTTCGGGGACATTCCGACCGTAAAACGGCTGCTGGAAGAACACCCTAACTTTAACGTTGATTTTAACGACATTC
Marker30552	TGACGGGGTCTGGGGGCACCTGCTGGGCTCTGTGTAATGGCCCCCATCATCCCTCAGACGGGGAGAGCTGTTTTATCTGTCTCAGTGC
Marker30558	TTCACACAACTTTTCATCTACTTCTTCTATCATTTCAAATCATAGGAAAAAATATCTGACCCAATAACTGAATTATCAGGTACCGTAC
Marker30594	AAGAAAAGAAAAAGAATTGGGTTCAATTGTATTGGACGGGCTGCCAACCGGTGCCTATTCACGGGCGCGATCCCACTACTGCAGAACA
Marker30600	CAGCCTTGACCTCTTGAGGCGTTCCTCTATCCCCTCCCAGTCCTCGGGGTCATGACCTGCCGAGTTGGGAAGCAGGTGACCCTTGTCG
Marker30635	CAGATCTACTGGTCCTAGGCTATATTAGTGTTCATTGGAGCAACTTCATACGTTACGAAGAACACAATCAGCCGGGTAATTGATGTTT
Marker30691	AAATACAAGTACAGGTATTTAAACATTACTTGTCAGTAGGTCTTTAACTCTGTTTTTTCAGTCCACGTTCTTCCGAGGTGCAGGCTCC
Marker30719	TCACCAGGTGTGTTATCAGTTCTCCTATTTCTGTGGCGAGTTCCAAAGCTGTAGGCAGGGTGGCGGAAGTGAGCGGTGGGTCCAACAC
Marker30721	CATGGAGGGGTACATGCTCTGCGCGGTGTACATGAAGTCGCGGTGCAGATGCGGCTGCATGACGGTGTACAGGAACTGGAACTGTGTG
Marker30763	CTGTCAGGTCAAACTTTCCGAGCAAGTGGTTATCCTTGGTCATTGGACGTTCTCCTTCAAAGACCTGGATGGTCACAGTTGGTTGGTT
Marker30774	ATGTCCCCAGCCCCAGACCTCTGAGCATCTGGCAGCAGTGGAGATCATGAAACTGAAGCACATCCTGATCCTACAGAACAAGATTGAC
Marker30775	AGACCAGTAAAAGAATTTGAAAGCCTTTTACCGTTGGACCTGAAATCGCCCAGAACATCCTGGTCTGTCACATGGGAAGTTGTCTTCC
Marker30805	TCATTCAAGCTTTGGGAAACAATTTCATCAGTTTGAAAGTTTTGCAGGCTGACGCGGTCTGAAAAGTGCACACTTTGTTGCTCCGAGC
Marker30815	CTTTGATTGATTTTCCCATGGTTGTCTTGACAGTCGGCCCTACAGAATGCAATTTCTATTGAGGAGGGGCCCATGTCTGATACTACAG
Marker30816	CCAGACCCAGAAATCTTTGACCTCTTCAGGGGGCATGAACTCGGCAGATAGTGAGGTGGTTCCCTCGGCCACACCCCTACCCCTGACC
Marker30817	TAAAGCATCTAACCCCTACAAATGATAGTCATGTTGACTTATACACTGATGACAAATATCTATATTGGAGTAACCACTGTGACCTGTA
Marker30834	CATCTATGTCCATTGATAGGTCTTGGAATATTAGCAAATGCTACTTTTTACATAGTCATCTACATCCAATTTCATAATTATTACATCG
Marker30921	ACGTGGTCGTCGCTCATCCTTTTGACGGGCATTCTCTGTATAGCTGTCAATTACTTAGCCGACCTTCAAAAACAGGAAGTCAGGGGGA
Marker30924	ACCAATGCCACTACAACCTAGACCAGATCTATCCCAGCCAGAGGAGGAAAACCAATCGCAGCCAGTATCAGGGGCTCAGCAAAACCCT
Marker30961	TGACAGAGTATGTGATATTTGTAGATTGCCACGAAGGCGTTCCGGGACCCACTGTTATCTCAGGGCCGCGAGCGCAGCGCTGAGGAGA
Marker30968	AACAATTTGAGATGCATGTGGCAAATCAACAAGCTGCCCTTGGTTTACACTAGCAGGGTCCTGGGGTTGGTTAGTTGAACTAGTAAGG
Marker30977	TGTCCATTTTTTTTTTACATTATGCTACAACTTTTCGCGGCTTCTTTTCGTAATTGCACTGTCGCCTCTCCCATTCCGTTGAAACGTN
Marker30982	TGAAAACGAGAACATTGCCAATGCTTCCGTCGAAAGCAATAGAGTAGAGGAGGAACCAAGCAAGAAAACTGGTTCCCACGAAGCAATG
Marker31009	TACGGAACTTCTTCATGACAGCTTTCTTGTCCATCAGCTGAACCTCCTGCATCTTCTGGTCACTGCCGGAGAAAAGCTTCCTCCTGGA
Marker31016	CCCAGCTACCGCCACAGTTGGCCAACGCCGCTCAGACCCGATCCCCCAGTACTATGACTGAGGGCGACGTGGACCAAATCACCAAGAG
Marker31030	TTCCCGAACGGAAACATCAATGGTGATCTGGGCGATTCGGATAATACGTTTATCAATGATCGGCTTCCCACCAATAACGATCCGTTCA
Marker31039	GCGTGGGGGGCACAGCAATCCCACATATAGGTGCTACTCTTGGACAGAACATAAGCATCCGCGATACCCTGATTGACACAGAGAAGCT
Marker31041	CAGGACTGGACGTGGCTGCCCAAGAACCGCCAGTAGAGGCACCGCCTGCCACGGATCAAGATGGGAAAGAGGCAGGGCATCAGCTGAC
Marker31073	ACTACTGATGTCCTGGCTGTGCAACAGTTATCAAGTAAATATACAGAACACATATCTAGAAAATGCTTACCTCCACAAAGAAGACCTT
Marker31139	ATCTCCATCCTGCAAATAATAATAAAGAGAAAAAAATAAATGAAAATATTTTCCTCACATAAAAATATATCTGACAAGAAATTCAGAG
Marker31236	ATGATATCATGTAGTGATAGTTGAAATCTTTAAAAAGTATTAACATACATGCAACAGAAGGAAGTTTGGATGGTGAATGGTTCCATCC
Marker31249	GAGGACCGAGTATGAAAATAGTAGAAACAAAACTACGGTAGATGACTGTGAATAGAAAGGATCAAAATGATGACGAAGATGAAAGTTN
Marker31296	TTAATTTCTTGAAAATTATCTAAGAAAATACTACGATACACTGAAAATGAAAACAATTCAAATTTCAAAAAGATTTCATCTACAACTG
Marker31303	ACATCCAGATGATCTGCTGAAGTTGACATCACTCGAGAGCTATTCACATCAGAGATACTCTTGGATTGCACAGTTTGAGAAATTCGTG
Marker31354	TGGTCATGTTGACATTGAGGCGTAGACTAAATGATTGCTAGACGCTCTACCGTGGGGTGTACACATAGAGCTACCCCTTTGTTATCGT
Marker31383	AGCCGGTGCCGCTTGGTGGGCAGGAGGACAACCCGCATGCCGACGAACCACCCGACCCTGGTCGATCGATACCCACCCCACTGAAGCT
Marker31400	TCACTGTTTGGAAGGAATGACGAGATATACGCCACATTCACTGGGTACAAAGTGAGTGACGCCAGCTACCAGGCCCCTCCCGCCCCCG
Marker31425	AGGTAAGATAGTAGTGATAATTATAATGACTGTTTTATTAATGGTCTTCAAGTGTGCCAGTCATCAGGCAGGGCAACAGGAACCCGTA
Marker31461	ACGATATTCCTATATAAAAGCAGTAAAATTTTCTTAAAAATTTTAAAAAAGACATTCAGTATAACAAAATAAATAGTGCCTGTTTGGG
Marker31479	ATACCCATCTAACCTACCTTGCAGTGAAATACTGGGGACTACAGGTCTACATGACCTGAGCTCTAAGTCCATATGCTCCCCCACAGTC
Marker31512	GTTTTCAGACAGCAAGTTTGACTGCCCGTAGCATTCCAGGGCTTCGACCAATTAGTCCAAGAACTGTGCGTAATCGTCTGCGCGAGCA
Marker31529	AGGCAGAAGTGTTATCCCCCTTTGAGTGATGTACAATGTACTTACAATCCTGCGGGGCATGGTGTACACTCTGTGGCTTTGGTCAGTG
Marker31533	TCTCATTTATTTCTTTACAAGGACTAACTGATGCCAGTCTGTGCTCGCCCTGCTCTGGAGGGTACTACTGCCCCACCCCGGGGATGGT
Marker31537	TAGCCCTGTCGTAGTGTCAGTGGTGTAAGTTCCGTTCTCACACAGGTAGGGGTCTGACGTGTTACCGGGACAGTAAGAGTACGAGGGG
Marker31542	GACGTAGGGCATCTGCCAACTTGACGTGGGAAGCCACGTGCCCTTCCTCTCCCTCATGCTCTTTGGCATCACTCTGGGTCAGGACCGC
Marker31543	AATGACAATGATGTTAATGGTTTCTGCATACCTTTTGATCCCGCCGTCTTCTGAGGCTGTCGGTGCTTCCTGTTCGCTTGATGTCCCC
Marker31547	TTTATTGCAAAACTATAAATAAAACAGCAAACAAACAAAACAAAGAACAAGTGGCGATATATGGCAGAACAGCCTCGTTCTGGAGGCG
Marker31560	AGACATCATGCAGGTACAATTAGACTAACAGTAGATCACCTCCCTAAGTGTAAAAGTCAACGCCACCATCTAGTAATAACATTATTTG
Marker31563	CCTCATGTCTGAGCAGACATGTGTTGTAAATCTCTGTTTCTCTGAGCCAGCTCGCCTCGTCTCGAGATGAGAAGATTTTGACAGCCAA
Marker31567	ACCATATTTTCACCCCCGTTTTACCTGTGCCGTCGCAGTTCTCTTCGTCCACACGGCCATCACAGTCATTGTCCACTTCATCGCCCCT
Marker31583	AGCTGAACACGATTAAAATTTAAAAGTATAGTTCGATCAAAATTCATTTTGATTTTAACTTTCATTCTAGGACTGAGCGTACTTTTGG
Marker31589	CATGTAGCCGAAGCCTTTATGATTACGAGGGGTGGTGGGGCGCTGAAAGGCCGCCAGCGTTGGCTTGGCGACCAAAGTCTCCATCACG
Marker31627	AGTTTTATGAAGTATTCCCTTCAGTATATGAACTGCTGATTGACCGTGAACATCTGATGTCTGAGGGCACCCCGCAGTCGGGTCTGCC
Marker31628	AGTTTTATGAAGTATTCCCTTCAGTATATGAACTGCTGATTGACCGTGAACATCTGATGTCTGAGGGCACCCCGCAGTCGGGTCTGCC
Marker31636	GACAATAGCTAAGGGTGTATTCATAGTAATATCCCAAACTGTTGCATTGTAGTTCTTGAGAAGGTTCTAAAAAACATTTCACTATATA
Marker31652	CACCATCTTCTTCAGTGACATCGTGGGGTTCACACAGATCTCTTCCCAGAGTTCCCCGCTGCAGGTGGTCGACATGTTGAACAGTCTG
Marker31656	TGATCCACGTCCTACAACAAACTCTCAATATAATACTGTCCCTAATAATGGTGAATATTAAACAATCTGCTACACAGATACATTGTTC
Marker31690	AATCCGAGAGCCAGTTGCTCCTGCCGGCGCCAACATCTGATCATGTGACCTGTGTACGAGATGACAACCTTGCGGCTTGCTGCCTGCC
Marker31747	ATTCCTTAATTAAAGATGAATTTTAATTTATGTACAATTTAATTAATATATAATTAAGAAAAATGTAAAACAATTTTATCACACTAAA
Marker31786	CTTTATCAGCGTAAGTATGGCTAAACTCAAGTTGACAGTCATTAACCAGTTGTTTGGATTGCTATTGTTCTAGATCTCTCTGCATGTA
Marker31790	CTTTATCAGCGTAAGTATGGCTAAACTCAAGTTGACAGTCATTAACCAGTTGTTTGGATTGCTATTGTTCTAGATCTCTCTGCATGTA
Marker31798	CTTTATCAGCGTAAGTATGGCTAAACTCAAGTTGACAGTCATTAACCAGTTGTTTGGATTGCTATTGTTCTAGATCTCTCTGCATGTA
Marker31802	CTTTATCAGCGTAAGTATGGCTAAACTCAAGTTGACAGTCATTAACTAGTTGTTTGGATTGCTATTGTTCTAGATCTCTCTGCATGTA
Marker31868	GTTCCAGTGACATCGTGCAAACGATCATCGCGGAGGCGATAATCGTGAACATCTGTACAACCGCCATATAATCGCAAACTGTTTGGGA
Marker31906	GGGACGTATTCGGTAACACATGAATGCGTGAAAGGCCCACCGGGCAAGATAACACTGAAACCCGAAGCAGTCCCCCACTGCGTCACAA
Marker31934	ATAACAATTGAATTTCACTATGAATGTCTGACTAATTAGTACGGCTTCTTTGCAGCTTCGACTTACCGCCCACGACACACGGTATCCC
Marker31957	ATTCCGTTTTCTTGAACATGCAGAAGCATCCATCAGGCGTGAGTTATCTACCGACGGAAGAGATGCGGCGGAAATTAAAAATGATTTG
Marker31960	TTTATTTTGTCGTCTGATTAATCATCCAATGGCGGACCTGAATTTACGACGCCTGCTCGCGCCCGTTCTTTAAGCTCTTTGTTGAATG
Marker31965	AGACAGTGAGGATGACGACCTTAAGGGTGACTTCCTCAGTAGCAGCTGTTTCGCAGAACTCCGTTTGGAGAAAGGACCCATCGACAGC
Marker32018	GCTATGGCTTCCCATTTCTTGGCCGCGACCACAGTCAGTGTTATAAGCAGTAGTAGGACCACGCCCACATAACACAGAATGGGAACCT
Marker32076	CCCCACCTCTACCTCCAAAGACCTACCCCCACAAAGTCAGCACCTGTACGGTAGTCCCCACATCTCCCCATCAGCCCAAAAAGAAACG
Marker32081	CGTTTCTGTCTCCGTCTCGCTGGGTGTCGGGGGGAGAGCTCTTTTCGTGACGGGCCGACGTACGACCACTCGTTGTTCAGGCATTTTT
Marker32118	TTCACTTTGTATACAAGCTTTTGTGTAAATATTGGCATTTCTGGTGCAGTGGTTCTTGAGAAGAAGATTTTTTAAACATTTTCCTATG
Marker32132	GTAGAAATCAAGCAGGGCCAGGTCCGAGGGAGGGTCATAGGCTACCCCAAGGATCCAACATTCAAACAAGTGGAGCAATTTGCCGGGG
Marker32139	TGAAACCGGCGGAAGTACAGACGTGGCCAAATCACCGCCTCCTTCCGTAACAAACACTTTTGGTCCACCGTCCGTGTTATCTGACACA
Marker32145	AGTGACAAGCTACACGACGGACCAGGAGAAAGCGGACATCTACGACGTTCTCTTCAAGATCTACTACATTCAGGGCCGGGCTTTGGCC
Marker32152	AGCTTTTTGCCCAGACCCTGGCCAGGTTTCCAAACTGGGGTTCGGAATTCGCTTTGATGGCCGGATATCCTGGATACGCGGGTCTAGA
Marker32163	TCGCGCTTATTCATATTTTTTCTCCATAATGCAACCGACGAAGCATCTGCAAATCCTGCATTTCTGAATGAAACTTGCTAATTTCGTA
Marker32169	ATATGCCAAATAGTCAGCTTGAACATTATCTAAGAAATGAGGACAGTTACCGGCACAATTATTGGCAAATGTCTTTTTCTGGTCAGCA
Marker32188	CGGGGTTTACGGCTCCACCGATCCCAAAACCAGGCCCCCCGAAATCAGGACTTCCTAAACCAGGTCCTCCGAAACCAGGTCCCCCTAA
Marker32202	AAAGATGGACGCCTGTACTGGTCGCTCGTAGACAGAGTATATCCATCAACCTGATCCTCCTCTATGATGTCACACTGGACAGCGCCTC
Marker32250	AAAAGCAAGGAGCGCCAGCAGCGACGGACATTTCCACATCCGGGGCTTGTGGTCCGGTAATGGAACTCCCCCCATCCTACAGTTATAT
Marker32277	CCGTCTTGTGTTTGTTTTCGTTGTAGTCGCCAAACTGTATGTGTGCCTGTATCCCGGCCAGCTGGATCGCCTCCTCCTGAGTGACCGG
Marker32327	CGTAAACTCTGATGGTTATCAGGTGATGATACGACCCCCGCAATAGGTCGCCGCGGGGATGCCTTCCCCCCGGATGTCAAACACCTCT
Marker32334	AAGATGCTGCTCCACGACAGAGATGAAATCCCTCGCGTCCACGCCCTCGGGCAAGCTATTCCCCCGGGCGCCCATGTGTTTGTGGGCG
Marker32365	ACGCCTGTGATGTCCCGCTGTTGGGCGTCTGTAGTGACATCATTGAGGATGTTGTAGAACACGGCCAGTATAGGATCGACCTCGGGGT
Marker32411	GCATCAGCTGAGCAAAAGTGACGTTCCCACACCTTCAAATACCCGCCGGCGACCAGAGTTTGACCTGACCTGTTGATTTCTTAGTCAA
Marker32420	GTCAAACTGAATAAAGAAGTTGGCAGAATGTGCAAGCAACCTAAGTTGATGTTTTCTACTGGTTATTATGTTACGTGTAAGGTTGTGA
Marker32424	CTTTGTCTCAAATTGTATCTCTTTAAACACAACTTTGTGTGGTCTATAATTCAGGACGGGGCGAAACTGTTTGCAAATAACACAGGGC
Marker32425	GGCCAGTCTTTACTAAATTCGCCCGCGCTGACAACGAGGGCGCACGGCGAAAAGCAGCGAAAATAAAACGGGCACGAATTTTTCCAAG
Marker32434	CCGAAAAATGATAGTTTGGCTTAAAGATGGACAGGTATTTCGGCCAAGGCAAGACAGGGTATCATTTAATGTCGGCGATGGGGTCCGA
Marker32435	ATATCGCGAAGAGCACACTGTAAAACAAAAATACTCTTGCTCTGAGGGAACAACATGGTTGGGATTACTTTAATCATCAGTGGGTATC
Marker32436	ACATCAACTGCAGCTTCATAAACTGTTCTGCGATCTTCTGAAACACATGTATATACCCCGCTGTCCCGCCGTTGAACTGGGGACATTA
Marker32491	CGGCCATATTCTGAGGCGATGGTTCCAGCAGATTACTGCTGCACTGTTTTATGCCCTCTTGGCTTGGGGGACTATCTTCGCGTGTACA
Marker32514	TTTGTTGAGCTGAGAAAATTACGGCGATCTGTTTTCAATTACTTTCTTAAATTTTGGTTTGTTTCTTCATATAACAAAACAAATGTTG
Marker32537	ATGATTTTGTAGACCAGATCTTTTAGTTTTTCACCAAAATTATAGGTTTCACAGTTCTTTTTGAAATGTGGTCGTCATTACAAATTTA
Marker32604	TTTAATTCTCAACATTAGGCCTACAATTGACAAGCAAATCACACAATCATCTGATGATTAATTTATACCCTTTTTTATACCCTTTTAT
Marker32635	AAAAAACGAAAAAGAGGCAAAACTACGGAGGATATTATCCAAGAAGATGTTGTGAAAAATCCCGAGGGAACACGAAGACCGTTATTTC
Marker32651	GTGGGGCATTGTCGTTGACGTCCTGGACATTAACAAAAAGGGAGGTGGTGCCAGTGAGAGGGGGGTTCCCTTGGTCCACGGCTAGGAC
Marker32695	GTCTAGCTGATGGTATCAAACCAAACCAAGGTCGGGTGGAGGTTTCCCGGGACGGGGTGTGGGGGACCGTCTGTCACGGCCGCTGGTC
Marker32696	GAATATATAACTAAAGATAATGTCTTATCGTCAAATAAATCAACAGCATTTACACAAAACAGAAATTTATCCAATCACATTACTAAAG
Marker32747	ATGGTGTCACGGAAATCCTTGAAACTTGGCATGTGGATCCTCTCCACCTTGTCGTCAATGACCTGCACGTCTTCTGAGAGGTCATAGT
Marker32772	AGTGCAGCAAATGATGATGAAGAGGTGGATACTAATCCCTTGCGCATGTTAAGAGGTGGTGCTATCCCCACAGTCCGCGGAGGGCGTG
Marker32805	CCTTTAAATTTTCTCTTGATGTCATCTTTATTACTGTCAATAAATCAATCTAATTCTAATAAGATAAATGCTTACCTCCCCTTAAATG
Marker32829	CAAGTGTGGCTTTTAGCGTCATAAATCAGCCTCGTGTGTATAGGGGTCTTCATATTGACAAATTTTGATAAATCGTAAGAAAATTGAA
Marker32834	TTGCTCTTGTTGTTAAGTCGGCAGTGGTGTCTGCTCAGGGTGGGGCACCAGGGGCTGCCACCCAGAGTAGTGCCGGTACATCTCTTGA
Marker32841	TCAGTTTTGAACAGCTATTTTAAGAATTAGTCAAGAATTTTTGTGGTCATATTTTGCGAGCCATCTACGACATATGTCCTGCGGAGGG
Marker32842	CGGGGTGAAGTGTTATATTTAACAGTTGTTCGTGCTTGTACCCAGTCTGTGTGATGGCCAGAGCCAGGCATGTCTGCCCGCGTCCAAG
Marker32845	TATGTTAATATTGACAGGATGGCTGACTTAGGTGTGCTGAAGTCGACACCGGGCGGCCATGACTTTCTCCACGATTTCTCCACCACCT
Marker32880	CACCCTGTACCACTGTGGGGTCAGTGACAAAATTTACCACCATGGAATTTCCGGTACTCCTCAGGAGATCGGGAACTGAGCGCCCACA
Marker32887	CGCGCGTTACTTACATTAAAAGGTCTTTCAGTGGTGGGGGGCTCATATGTATGTGCCATTCTCCCCCCTCCTTCACCCCCAAAATGAC
Marker32933	CAGATTTCATTTGGATAGCAGTGACGGCCGTTGTAGGGTGTATCGTCGCGTTGGGGAGCGTTACCAGGACGCTTGTGTTGTGCAACGT
Marker32980	ACTGAAACATTCATATAAACCTTATTCAGACATAAAATGTGGGGACCCACCCACAATGCACTGCGGCCACTACAATGGCTCGAGCCAT
Marker32990	AAATAAAAAATATATAGATATATAATGCATTTCCATATCTGAGATAATATTAATCATTAAGAGAGCATATAAAAATGGTTCTTACCCT
Marker32998	TTCAGGGCCTCCATCACGGGCTGGGAAGGGGGTGCGGCGCAGTGTTTGGGGGACTGATGGTCTACGGTTACGGTAGGCTTTTAAACGT
Marker33001	TATGCACTTATAGTGAGGGGGTTTCACAAACGCTATTGCCAGAGTAAACACTATCCAACAAATTAATGAAAATAGAAGCAGTTGTTTT
Marker33016	TCTGTTTCTGATTGTTTCTTCATGGTTTCTCCTTGTTACAGGTCCTGAAGCAGTGCCAGCCCCTCAGGTAGAGTGTTGCCTCAGAAGT
Marker33045	AAAATCCACTGATATTCCCAAAAATTGACTGACATTGTCTGACATCTACTGTATAACCACTGTACCCTACTTTAAATCCACTGTACAC
Marker33141	AAAATGAAAATTGTAATGTGTAAGAGATTACGAAGTATCCATATCAATATCCATACATAGATGTTGGTAGCACAATATCATTAGAACA
Marker33142	AAAATGAAAATTGTAATGTGTAAGAGATTACGAAGTATCCATATCAATATCCATACATAGATGTTGGTAGCACAATATCATTAGAACA
Marker33148	TATAATGTATACTGGTTATACATAAGGCAATGTTAGAATATCCACTGCACCCTCACTTTATATATTAAAGCTGCAGAACTGTAGCTTC
Marker33151	CCATGTTTCTTGAATTTGTGTTCCACAAGCGTGGGGCGGTTGTTCGGTTTTGCATTACAGATGTCACACACAAATCTCTGCTTCTTAA
Marker33165	GCTCCAAATAAACGTTACACGATATCAACGAAAACCTCTTACTGGGTCAAGTCGTTCTACGGGACCCGGGGCAGAGACTGTGTTCAGT
Marker33172	ACAAGGTTTCCCTGGGAAACCACTGGCTGGTTTCCAGTGAAAGAGGCTGCCATATTTTCCCCACACACTGCAGTGGCACTGTTGTCCA
Marker33182	TCGAAACATTCCTTGTAGAAACTCACAAATCCCGACAGAGCGGGACCGACGAGGGGAGATCATCAGCCACCCCCATTTCCCTTCACCT
Marker33255	ATCGTCTGCCTCAGATGTCCTTTTATACAGCTTAAATTGTCTTTAAACGATAGAGAGCTCCACAATTATAAAAAGGCAAAGGCGAAAG
Marker33266	CGCTCGAAAATTTACATGCAAATTCTTTTGAACCCCAAACTACAAATGTTTGATTTCCTGACCCCTTCATACCAAGATCACAAAAACA
Marker33280	TTTCTGATGTACAGAAACGTATGACTTCAGGGTGCGATTAAGAGTGTTTAAGATACCAAATATGATGAGCAAAAGCTAATGTTTAAAC
Marker33315	GAGCGCCGAGGTTCCTGCAACCAAAACTATGTAATCATCGGTGGTAGGCGCGTAGCTTGCAACCATGACACAACATGTCCATATGGAG
Marker33343	GTCCGCCTGTGGAACCGGTACAACTTACTAAGCCAAGGAAACTGTCCCCATCTCCTGCCGGCCCCCTATCTCCAGCCCTGTCCCCAGA
Marker33357	AGCTGAGGCACAATTGGCACGATAGGGGGCGCCACCGGAGAGAGCGGCGACATCTGTGTTGGACTGTGATGGTTGTAATGGTGATTGA
Marker33390	CTTCATCACTTGGTTTATTTCTCTGGAACTGTATACTGGTGGACCTTTGGGAATACGGCAAACCTACCCTTCGTTATTACCCTACGGC
Marker33425	CCCGGACCGTCCCCCGGGAACTGACGATCTGCTTCTCTTGGACAGTGCTGGGGTCGGAAACATCCCGCCTCCCGGCGTACGTGTTACT
Marker33443	GATATGGGGTGTTCTGCCAGCACCGAGGTGAGAGCGGTGTCTCCTGAATTTAATGCGAGACAGAGAGCGGGAAACCAGAACAACCCAG
Marker33450	AATCTCTTGATGCTCTGTCCGAGCTCTACCACTGGATTTATGACCCCCGAGCTGGTCTCGCAGTGAACGACCGCCACCATGGAGAAGG
Marker33490	AGCGACTTTGTCAAGTCTACTCGACATAAAGAGCAAACAATTCCAGATCTTAACACCCGAGTTTTACATGGTCACGTAATTCGGTCAC
Marker33492	TCGCGACGAGGATCTCCAGAAGAGGCTGTATGAGTTGTCTGCCCGTTATTGTTGTCTGGACGGGTACGAGGCTCTGACCGCCCCCGCT
Marker33539	GAGAATATAGCCTTGCACTCATCCGGGTATCTAAGCTCTACAGTGGTCGATTATCCCTTCGAATACGCCGTTGATGGCATCACGACCA
Marker33560	GATTTTATTACTTCCAGGTGTGTTTACCTGTGGTCCGTGTCCTGTCCGTGCCATACGCAATGGGGACCTCTACTTGGGTTACGACACC
Marker33650	TGACATCCTTTTTGTTCTGATAGTGAACTACATCCTGGTCCCTGAGACCGCCCTACCGCCCAAGGCCTTCGTTATTGAGCCGGAACAC
Marker33655	ACGTTATTCCTATATAAAAGCAGTAAAATTTTCTTAAAAATTTTTAAAAAGACATTCAGTATAACAAAATAAATAGTGCCTGTTTGGG
Marker33668	AGAGATTGAATTTCTTTTTCAATATACTGTAAACCAATTTTTATTTGCGTGCGAGAAATTTTCGCGAGGTTAGCGAGAGCCTTGTCGT
Marker33687	TGGATTTAGTAAAGGACGGATTGGTCACTAGTTTGTGGTAGGTGGGGTACGGTAATGGTCCAACGATGTATTCCTCCACCCTAGGCGG
Marker33691	CCTAGCAGAGATCATGCAAAGGGTATAACTGGTTGAATATCGTATTTAGTTAATTAACTTAGTCATCAGACTTTGAATGAGACCATGC
Marker33694	AATAAACACATGTAAAATATTAAGAACTCAATGCACCTATTGTGTATCACAAATCAGAGAAGAAGGGTGCACAACACAATCTACGCTT
Marker33710	AAGCTATTTGTCTGTAATTCATATGTCCATCTCATGTAGTAAATGACCTGCAAACTGAGACTGCACGTGCCCTACACGTCCATTCAGT
Marker33744	TTAGGAAAGCCCTGTGTTCGCGGGTCATCGCTGCAGGGGGTCAGGTTGTAGAGAAACAGCTGACGGTGTCTGATGCTGTTTATGCCCG
Marker33764	AAATTAGTTGACCCGGATGAGGTGGCTCGACGATGGGGCGAGCGGAAGTCCAAGCCCAACATGAACTACGACAAACTCAGTCGTGCTC
Marker33767	TTCACTATATATAAAAGCTTTTGTGTAAATATTGGCATTTCTGGTGCAGTGGTTCTTGAGAAGAAGATTTTTTAAACATTTTCCTATG
Marker33777	ATCTGGCTGATTAGTTTCTGAGAAGAAGATTTTTAAAGATTTACTCTATATAATCATATGTTAAACTTCGACCCCCCATTGTGGCCCC
Marker33801	AGGAGAAAAATGGGCCTGCCTGCATGCAAGAAGACTATGGTTATACAGAGTTCAAACCAGAATACACTGAAGACTGTCTCTATCTCAA
Marker33812	GCCTTGCGGGCACAGTCTCCAGTTATCCTTGTCCCACACAAATGTGAACTTGTCAGAGCCCTGGTTCTGAAGCGCAGTCACGTGAACA
Marker33852	ACGGGAGGTTTAGAGATCTGTATAACATTTCCGACGGAGTACGTGAAGACACAGCTCCAGCTAGACGAGCGGTCAGGGGTACAGAAGC
Marker33854	ATCAAAAGGAAATTCCGCATTGACTACGACGTTAGCTTTGAACGGGTGCATCGCATGGGAAAGTGGTCTGAGCATAATCTATACCCCA
Marker33871	ATCCAGAAAGCCACGGAATGCGTTGACCCCCATCGTCACGGGGAACGAAGCATTGGTCCTCTCCAATTTCACCTCGGCCTCCAAGGTC
Marker33890	CCTTCTAAGGGCAATTTTTCTAAAGTGATAAACATTGATTTAGTGAGTTCTTACCGAGTGCTTCGGAGCATGTAGAGCACCTCTGAGG
Marker33892	ACAATTTTCAATAGTTTCTTCAAGGAAGTACACTGTACTGTGAACATGCAGTTTCAACACATAGGCACTCATACTGTGTATATAATAC
Marker33902	TGTATTTTATGAACGATTGGAAAACTATGGCAAAATACTATTCCAATTGGATACAACTCCAGGTCATTTACCGGGATGGGAGAGGCTG
Marker33932	AATTCTCTACTATTTGTCTGCATTTTTCAGGTCGACATCGCAGCTTCAAGCTCCGCCTGCCCTCCATCCGCCGCGACATCACGTGTAG
Marker33942	CAGGCATTCGTCAATGCGAGGTAAGGGATAGGCATCTTTGACTGTGACATCGTTTAGTTTGCGATAGTCAACACAAAATCTGGTGGAC
Marker33946	TGTATTATTCACACGCTGTCGAGTTTTCCTCTTCTGCGCCCACAATACCAAAAAGATGAGAGCGCCGGTAACCAGTAGCAACGTCGCC
Marker33947	CAGGAGCTTTCCGGGGGTTTTCCTCTTGAGTTGCCCTGGATCCACTGGGGGCCTCAAGATCCCCTACCTACAACTGACACACCCTCTA
Marker34034	ATTTCAAATTGCTGCTAACACATGTATATACACATGTATAATATGTGGGTTCTCGAGTATCATTTTCTTTAAATAAGGTACAAATCTT
Marker34151	ACGTTATTCCTATATAAAAGCAGTAAAATTTTCTTAAAAATTTTTAAAAAGACATTCAGTATAACAAAATAAATAGTGCCTGTTTGGG
Marker34246	CCGGAGGAGGTTTGTGAACTGGTTAACTCCCTTGTGCCGGCCACAAGAAAGGTGTGGCAACGGGTCAAGGTCAAGATGTTGCCCACCC
Marker34254	TGAATGACCTCCTGGCACCACGGCTCCTTACTGGAGCCCCTGTATTCCTGTGGGGTGAGGGTGGTGCTCACCTTCCCCAGGGTGGGTC
Marker34276	TTCAGCAGTATCTGTGCTGTCCACACTACTTGACCTGCTGATGGGAGAATACATGCTCATAAGTCTCTCCGTTTTTACCACTTCTTCC
Marker34277	TATCCTATGGTTCTTTAGGCCCTCGGTGGGGGACCCAGGGGGTGTGCGTGGACCCTGCCTGTGATTTGGGGGGCTCCCAGGGGGTGTT
Marker34307	CACATGTTTGTAAATATCAAAACGCTTAGTGCTCCCATTATCAGTTATAATCACAAATAAGTGATATATAAGCCTCTACAATTATTTC
Marker34314	GACTTATCACCGCGTCTACACTGCGATTAGCAAACTTCCGCCAGAGTTCGTTTGTACCAAAGGCAGAGGACTATGGGTAGTATGTGCG
Marker34315	GTATTTGCTCACTATGCCAGCTCTTCATCCTGAATTTGATAGTCTCAGTGTCAAAAACTCTGTGAAAACTCTCTTTCGACAAATCATA
Marker34343	TATGCATGGGGGCGTTCAGCCTGAACGTGTCCAAAGAGGAGTGCTGCAGGAACCCCTCCCCTCACGTCAGCTGGACCCCTCAGACGTT
Marker34358	CAGACATTCCGTGCTCGATACATACAGGTGGATTAATGGGGGAAATTCGGATAGAAGTTCAAACTGTAAAGATCGTGTGACAATCATA
Marker34360	ACTATCAAAAAATATATCCCTTCAGAGATTGATGTTAACTTTCAAAAGAACAACGTTTCTTTCTCTTGAAGTGCCGTCTTACCAAAGA
Marker34416	ACACATCAGTGGAATTTAGATTACCATGACGACCACCACGCATCCGAAGGAATGTTCCATCATTTGGACATCACTACTGACGGCTGCT
Marker34483	AGACACACAGGATCGAACTGGTTCCCCACAACTGGAGGACCGGGTCAAATTGATGGCGCCGTCTGAACACACAGATGATAAGGTGGTG
Marker34542	GTTTTCAGACAGCAAGTTTGACTGCCCGTAGCATTCCAGGGCTTCGACCAATTAGTCCAAGAACTGTGCGTAATCGTCTGCGCGAGCA
Marker34592	ATGATTTTGTAGACCAGATCTTTTAGTTTTTCACCAAAATTATAGGTTTCACAGTTCTTTTTGAAATGTGGTCGTCATTACAAATTTA
Marker34594	ATTCCAAGTGCGCCAGCACTGACTGCCGTCCTGAATAATGATGTCATCCAGGTCAGCTGGGACAAACCAGAGGACAACCCCCACCGTG
Marker34613	CCGCCGAGAAGATGGACCGCAAAAGTGAAGCGAAGGACACAGGTGAGCCAAAGGCGACAAGGCGAATACAAGTAAATCACCGCCCGGC
Marker34614	CCGCCGAGAAGATGGACCGCAAAAGTGAAGCGAAGGACACAGGTGAGCCAAAGGCGACAAGGCGAATACAAGTAAATCACCGCCCGGC
Marker34616	CCGCCGAGAAGATGGACCGCAAAAGTGAAGCGAAGGACACAGGTGAGCCAAAGGCGACAAGGCGAATACAAGTAAATCACCGCCCGGC
Marker34627	GGAGCCCCATCAAAAGGACGTTTGTCTACTGAATGTGGTCCACCGTGATCAGGTTCGTGAATATCGTAGTGTGGTTGATCTGAGCGAT
Marker34631	GTTCTAAACGTGAAAGCTTCAATCATATTTTACTGTAAATAATAAATAACATTATGTCTTTAACTGGTTTGACCCTTTAACATCAATG
Marker34673	TCCGTTGGGGTGAGTTTCAATCACTATAGTTTCGGTGTTTCCGGTTCTAGGATTATGACGCAGCAGGCTGATATTTCGGGACGACCTC
Marker34707	ATATAATTATGACTATTGGAAACATTTCTTCCGGGATTGCGCGAAAAAAAACTTATAGTTACCAAAGAAAAAACCTGCGCTGCCTAGA
Marker34727	CCGACTGAGCAAGAACTCAAAGATCACGTGACCATCGAACACCCCACGGAGAAATTGGAACAAGTTGTGAAAGTAGTGGTGGTGGATA
Marker34729	AGGAACTCCCTTCTTTTTCTTCCGCTTCACTTTCTTCAGCTTTGTGCCGGGTGGCACATCTTCCGGGCGTACGATGTTTCCGGCGGCT
Marker34735	TACGTAAGAGTTATCTATCTTTACCAACATTGAACATTTTTGCTAATTTTGTGCTAAATAATCAATATAAAGTCAACTTTTTGTTATT
Marker34760	ATATCAAATAACCTTGCAATAATTCAAAAATATCAGTAAGTTTGGATATTACCTTTATGCAGAGTGAATGAACAAGTGTATATAAAAA
Marker34799	AGAATATTAACGAGGCCGAGTACAGAACGAGTACGCACGCTTTCGCGCAGCGTTTCATTTGTATTGTGACGTCATCTTTTTGCTTGGT
Marker34804	GCCTCGCACTGACCCAGAGGGCACGGATCCAGTCAGTGAAGTCCGCCCGGAGAACAGAAGAATTTCTGGATCACCTGTACGAGTACCC
Marker34909	AGAATGGGCAGAGCCAGGAGAGTGAACTCCCACCACAGGACATGTCGAGTAACAGTAGGTGGTTGATGTACATGCAGAAACAGAAAGA
Marker34911	GTTATCGGCCGTGCACAACACGGTGTCAATTAATCACCTCATCGACAGGAGATCACCCCCATCGTGTGGTGCATGCCGGATAATACCG
Marker34947	CTCAATCACAACTCCCTCTATTGCCTTTCGATAATACATATCGTCAAAACGCCGTTATTCACGTGTTTCAGTTCTCCCATCTTGTTTA
Marker34961	ATACTTCCTCATAATGTGATGACTACTTCCTGTTTGACAACTTCCTGTTTTGTATTACTTCCTGTTTGATTACTCACACTTTTTTCTT
Marker34970	AAAATGACAAGGAAATTAGAGACTTCGTTAAACGTGTACCACGGCGCCGAGACGAACGCCTTCTGGTAATCAAACGCCCATATCATGC
Marker34973	TGCACAGGCTGTTGAAAATAAATTCTAAAAAGTTCATCGTCTGCCTCAGATGTCCTTTTATACAGCTAAAATTGTTCTTAAACGATAG
Marker34974	ATCGTCTGCCTCAGATGTCCTTTTATACAGCTTAAATTGTCTTTAAACGATAGAGAGCTCCACAATTATAAAAAGGCAAAGGCGAAAG
Marker34975	TGCGCAGGCTGTTGAAAATAAATTCTAAAAAGTTCATCGTCTGCCTCAAATGTCCTTTTATACAGCTAAAATTGTCTTTAAACGATAG
Marker34976	ATCGTCTGCCTCAGATGTCCTTTTATACAGCTTAAATTGTCTTTAAACGATAGAGAGCTCCACAATTATAAAAAGGCAAAGGCGAAAG
Marker35021	AGATACTGTTGAAGTTAATATGTATTATGGTATTTATATATGGTATTGATACTGATGAAATTTTTTGTCCTCTATGTGCAGTAAGGAG
Marker35022	CTGAGTTGCGTCTGCATTCCTCATTGATTTCGTTGACAATGGTCCTCTCGACACGGTCCAGTGAGTTCTCCAGCTCCGGCCGGACGTA
Marker35050	TCACCCCCTTCTGCTGGCCCCTGCCCAGTCAAACACCTTATGCATGGCAGTGACCCCTTCCTTGCCCATTGGAGCCACATCACCGCCC
Marker35060	TTGACCACAGGGTGTATCCGGACAATGCAACACCTCCCCCGTCGATGGACTGCTTGCACAAGATGATCCCGAGGCCTCACTTGCTGAT
Marker35070	CTTCAGGCGTTTGTACAGCTCTAGACCCACAAACTGGGCACCACCTGTGGGCTGGTTTGGGCCGCGTCGATTAGTGGGCATCCTGGAC
Marker35090	AAGTCTAGTGAGATCGTCCGACATTGATAAATTGCATTGTGGGTCGAAATTTACTGACGCCGAAAAATTCTGTGGGATCAATGTGCAA
Marker35155	ATTCATGCATTATCTCCCCAAATTTCAAAGTACAAGTGATAAGCATAATAAGATTATTCCATTATATTACTAAGTATTATCACTGTAA
Marker35200	TGAACGAGGACCCCCAGCTGTCAGAGATGTTACTGTATGTCATCAAAGAGGGACAGACCAGGGTCGGGAGGATGTGTCCCAGCTCCAA
Marker35218	ACCATTTTTAGCCAACTTGGAGAATTTATTAATGACATAAAGTAGTGCATGACCCAGCTTGTCAAGGTTTATGAGGAAAATAATGAGT
Marker35219	TCATTCCACTTTTTTTTCATATTTAGGTCCATTGAAATTTAAAAGTCATGTATTGAAATGAAGATGCACGAGAAAAGAAACACTGAAC
Marker35276	TCCTTTGAGAAGCACATAGATGAGTGATTGTTTCTACTAATTATATAAAATGTGTTTGTTTAATAGCTGATGCAAAAAGGAGGTCCCA
Marker35312	ATGCGCTGCAGCTGTTCGCTGGCGCTGACACTGCCACCCTCCAAAGTGGTACCCGCCTGTACAAGCACTGCCTGGGGGGCCGTCTCTA
Marker35320	TACGTAAGAGTTATCTATCTTTACCAACATTGAACATTTTTGCTAATTTTGTGCTAAATAATCAATATAAAGTCAACTTTTTGTTATT
Marker35321	TACGTAAGAGTTATCTATCTTTACCAACATTGAACATTTTTGCTAATTTTGTGCTAAATAATCAATATAAAGTCAACTTTTTGTTATT
Marker35322	TCATCTAGGGAGCTAGCGAGGGAAAGCTGGCCGGACTGTCGCAGGGCGTTGATAAACAGTGCCACCGCGGAGCTTCCCGTTCCCTCCA
Marker35372	ACATTCAATGACTTCCGGTAAGTTGAATGTAGTTGTACCATCCAAGGCTTTGACACATAATCCGTTCACACGGCGTCCAGCGACTGTC
Marker35380	TTTTCATGTTTAGTTCACAACATTCTGTTTAGATAAAACTTCTTTTTGACTGAAAGGTTTATCAAGACCCATGTAGACAGCAGCTGAC
Marker35392	ATGTGAAGTTGAAATATTTTCACAGTGGGGAGGCACTCCCTGCATCCCGCCAACTGTCAATAAATCTATTTATCAGCCCATCTCCCGG
Marker35402	ATTATTGTAATCAAAGTCCCATAACTCCAACAAAAAGTATCGACCAATGCTGATTTTCGAACTTGACCAAGGTATTAGTGATATAAAC
Marker35461	TGAGTTTAATTTCTAAATGGCTTTAACATTTTTTAACGTTGGTGCTTCTTTGTGTCCTCTTTAGATAGGAGAGATGATGAAGGCGTAT
Marker35464	ACTATTTCACCTGTTTTACAAACTGTGTGTTGACCGATGAGGAAGGTCAAAGGTTTTTTGTACATCTATCACAGAGCTAAGCGACGTA
Marker35558	CATTAGCATTTAATTTTCTTTACTCACAATTTCTAAATTTCCGACCATCTTCTGCGGCTCTTCTTTCTTTTTGTCTTTCTCTCCTTCA
Marker35598	CAGATTTCATTTGGATAGCAGTGACGGCCGTTGTAGGGTGTATCGTCGCGTTGGGGAGCGTTACCAGGACGCTTGTGTTGTGCAACGT
Marker35682	CATATACGTCCTTTGATAGGTCCTGGAATATTAGCAAATGCTACTTTTTACATAGTCATGATAAATACTACATCGCTTGCTATTGTAT
Marker35695	ATTACTTGCAGATACATGCAAGAAACTATAACACTTTAAATTTTTGTACTACGCTGGTAGACATCAAAAGGATGACGGGAATATAAAA
Marker35709	TTTCCTTAAATAAAGTTATAGTTTAAGGTAATGTTTCCACTCCACCCACCTTGGACGTTCAGTTTGCATTCACACTGTCCCGTGGGTT
Marker35732	ACTCTTTTGCAGCCCAGACGACGCCATGCAATGGCCGCTGTGGATGAGAGCATCTACGTGTTGGGGGGCTTTGATGAAGACAGCGTCT
Marker35756	GGTATTTAGCCACCTCTAAGCTTTCGGCAAGCAGACGACACCCCGGAGGTCAGCGCGCGCGTCCATGGTAACGTCCAGCGCCGTCTCC
Marker35764	ATTTACAGGGAAAAAGTCTGACAAAGAGTACAAATATTTGGAAGAAATGTTGAACAGAAGTATTCTGAAATTGGACGGCATTGAAGCG
Marker35771	CATCAGCAAATAGTCAACCTGAACTGTACTGAAAAACTTATCAGCTCCCTTTAGTACGTTGGCTTCAAAAGTCTCAACGTCCATTTTA
Marker35788	AATGACTATTCAACTTTAACCTGAAATGTGCCTTACCCACTTCCTCAGAGGTTTTGATCACCCCAAGGTTGTCTCTCAGCCAGCGCAC
Marker35843	CAGTGTTCCTGTTGGACCAGTGGATGGAGCAATCTCTGCTCCCCCAGTAATTTTCTGGGGCAGGTTCCCATGGGGTTTCCTCAGTGTN
Marker35852	CGTGTCTACAAAACATTCCCTCTAGAGCATCAATGATTTTCTCACTTGTAATGTCTTTGGTAATTTCAATTTCATAATAACGGCTGAA
Marker35944	ATACTTTGATCTTTAACACAGAAGAAGCTAGCCCACCCCATCGAGTGTTTGTCCTTGACTTTAGAGGAGGTCACACACATCAGACAGG
Marker35987	GGAGCAGGCTGAAGGTCGTCCGACTGTGAGGAGGTCAGCATCCCTGGACAGACCCCGGCCCACAGAGAAGAGGCAGTACCCCACTCGC
Marker36008	ACTCGAGTGGGAGACAAACTGATCGTGACGTGTGGTACCCACTTAGCCACCCTGGATATCGAAGGCAACCTCCTTGGCACAACCCCCA
Marker36045	AACATCTGGTAAATCCTGGACGCCTGGTGTTTGATGTTTTCGTTTTTATGGCGACACAAAAGGAACACCTTGGACTTGATCTGACCTA
Marker36073	TTTTAGAATTTTTTGTTTATTCTGAGCATGACAAGCTGTTAGATTTGTTTTCAATAAAACATAATCGAATTATTTTTACCGTTATATA
Marker36081	TAATTAAGTTTGGGCCGTCAGTTTGTCGACGTAATGAGGCGCACACACAACAGCGGAACGCTGTTAGGGTCGACGACGTTTCGTGGGC
Marker36094	AGACAAGGTCATCCAAAGGTCAGGGTCATTCCACCCAGGAGCCGCGGTACAGCAGCTACAGTGGGATCTACTTTGTGATGGCCGTCAT
Marker36112	ACAGTTCCAAGGCGGAAGGGTGGGGCCACAATGGGATGAATTTTTACCTAGAAATATATAAAGATAATCTTCAAAAATCTTCTTCTCA
Marker36128	TTACCTTCTTCTGAGCAAAGAACTGTGGGTCAGGCATACCAGGGGATGGAAATATCTGACATCCAAGCTGAGGCATAAAGTTTGCGGC
Marker36134	CATGTCATCAAATATCTTATGCTGATGTTCTATGCTGTCCATCTGCTGCTGATGCTGCTCTAACATGTCTTCCTCGTCGTCCTTGGGG
Marker36147	GTCTAGTACCACCTCCTTTACCAAACACGCAGAGAAAAGTTACAGATCCGATGATGCCACAGGTACACACTACAAACATTAGTCCACA
Marker36149	TACAAAATGTCATTTCACTACCGTCTTCTCCATTTTTGTATGAACGGCGTGTCACGTAATTATGATGGACGACAGAACTGTGAATTGC
Marker36158	GGACTTCACTGTCACGGTGACCATGCAGGTAAAATATCGCAAAGCATTGTGGGTGTTTGTTTGGCAATGGCTAAGTAGATAATCGGTA
Marker36228	TTTTCTCTGACCTCAAGTTTTCTCTCCGATAGTATTCTCTGTCCGCCCACCCTAGAACTCCGAGTTTTATCTCTGATCTTGTCACTTA
Marker36283	AGCATGGACTACTGACCCTGGAGATATTCTCAGTATCGGAGCAGTATGCTGGTACCTACACATGTACTGCCACCAACTCTGAGGGTGA
Marker36288	ACACTCAAACACGGCTTCCTCCGTCTCTGTGACGGTGGTGTCCTTGAGCGGCCTAAGGACCTTCCACTGAGCCTTGGGGATAGTCAGC
Marker36298	ATTCGCAGAGAGGGACAGGCCCCAGCTGAGGAGGACCTTTACCACAAGGACAAGAAAAGACCTCCCAAATTTAGGACACATATCAAGA
Marker36305	TTAGTTTCATTTATAAAAAAAAATGTATGAAAAGGACTAGCATTAATCTTACCTTGATATACGGTGTAAATCTGGTCCTTTGGTCGTT
Marker36314	TGGGTGGCTGGCTGCCTTGTATTGGCATTCTAGGGCCAGATAGAAGGGGAGGGGGTGGTGTGGAGAGGTTAGGGCCAGGTACACTAAT
Marker36315	CTTGCTGTGGGGCGATGTTTCCAGGCATGGGCATTGGTGTTGAGAATGTAGAGGGAGTAAGCGAGCTGTATCCACCAGCCAGGTCTCT
Marker36324	TCTTTACAATGATCAGAACAAAAAACAATAACTTATAGTTGCACTAAAACCTTAAAATCGGTACATATATTTCGCTGGCATTGCACTG
Marker36325	TCGAGAGTGCGTTAAAGACATAGATAAATACATGAGGACCCGGAGCAGAGAGAGCCAAACAACGCGTCACTTCTGTCATGATGACGTC
Marker36394	AGGGTCCTATGATGCCAGCCCCTGAACCTGCCTCTGGTATGATGTCAGGAGCAATGATACCAGGGGGTATGATGGCAGGTGGTATGCA
Marker36395	AGGGACCCATGATGCCAGCCCCTGAACCAGGAATGATGCCCGGATCAATGATGCCAGGTTCCTCACCAAATGCAATGATGACTGGAAA
Marker36408	TCCTCTGATCTTCATTGGGGGGATGCCACGCAGTGGTACCACCTTAATGAGGGTCATGATGGACGCCCACCCCGAGGTGAGGTGTGGG
Marker36416	CTCAATCACAACTCCCTCTATTGCCTTTCGATAATACATATCGTCAAAACGCCGTTATTCACGTGTTTCAGTTCTCCCATCTTGTTTA
Marker36439	GCTTTGTAATAATTCCGTTTGATTATGCTACAAAAAATAAATAACCCTTTACATACACGTTGAGTGATTTTGGTCGCTGAAATCGGCC
Marker36480	AGACATGTCATAGAAATACAAAGAAACAATGGCTAGAGTGGTCACTAAAACACTTAGACACAGGTCTACCAGAAGCTTGATACAAAGC
Marker36488	TGGTAATAAGATATTTGATTTGTTTTGTAGGTTGACTGACCTTGAGCGACGACTTATGCAGGGGCCACCAGGAGGGCTGATCAGGCCT
Marker36498	ATAGTCACACAGATGATGCAACAAAAGCTAGAAATACTCATTACCTCCCAGAAGAGAAAGTTGATGGCCTGCTGATCTGAGTTGAGCA
Marker36500	ACAAAACCAACCAGCCTTCTGAGTACCATAAGGTCACAAAACCCTTCCTCGGCAATGCTGAAGCCTCTGTCCTCCATTAAACCCATTG
Marker36503	CTTGATCAACACTGACCTTTGAGGCCACCACGAGCTGGACCAGTTTGGGGGAGTTCCTGAGGACATCCACTGCCTCGGAGTGAGACAA
Marker36512	TATATGTATGGTACTTAATTCAAATAGATTATGATAGATATATTGTACGCCGTTATGCAGGGCGCCGGTTATGTATACGAATATAGAG
Marker36557	ACATCTCCACACATTGTTTCATGGATATAAGGACTAAAAACTTTGCCATTTTTTACACTCATCTCAATGTTAGATAGGATTAATACTA
Marker36609	GTGACACGAAATTATGACGTAGTAGTTTTGGTGACCATGGTAACAATGCACTACCATTGTCCATTCCGGAACTGGACCTCATAGGTGG
Marker36613	ACCATTGCCAATGCCGACCTGTCCATCGCTCGTGGAGATGTGGAAATGGCCGTCACCATGCTACGAAACATCACTCCAGACCAGACCT
Marker36642	TGAGCGTTCACTGTGAGTACAAGGACAGAGGCTGTAAGAGGTTAGTCCGTCTGAGGGAGATGGGGGTACACAGGGCGGACTGTGACCA
Marker36658	TCGACACCCGTATCTGCCGCTACAGTAGCATTCACACTTGTAGCGCTTACAGCTGCGGTCTATGTTGAACGTCTGCTCGGACGGGTAC
Marker36671	AAACAACAATGCAAACAATCAACAGAACAGCCACTGACCTGACCGAAAGATGAGGTACTGTAACATGGTGGCAAGTGAGGGCAGCGCC
Marker36678	AATGAAGTTGAATTTGAATGGGAGATAACTCAATTTTAAAACCTTTCCTCCCCATGCCCTGAAACATTGAAATTGCAACAACAACAAA
Marker36696	ATGTGCATGATTATCCTAACAAATATAACCTTTTTCTTTCACAGATATCACTCCGCTTTAGGAAAATGATGGTAGAAAAGAACTAGGG
Marker36719	AATCATTTCAAGCCAGGTCAAATGATTACATTCGTACAGAATAGCAAATTTGTTCCACAGAAATTACAAGAGACACAGCCTATTTTAC
Marker36747	TTTGACTGGGAAGTGTATATCTATAAATATGAATTGGTTAATCTTTTTGTGTACTAGCTCTCATACTGTTGAGAGACTAAATCATAAA
Marker36748	CCTGTAAGTGTCTGTCTTGGAGATTACCACAGATTTTAGTGTAACTGGCCACTTCAACCGACTGTCTGTTTGTTGTATTATGTGATCG
Marker36767	TGTGAATTTTTTACAATGTTCACAGTTTTCTCCTTGTAGTCTGTGTACAATAAATCTCCACTCTTGGTGACAGCTACGTCCCACGGCC
Marker36783	TATGACACAATACTCCGGGCATTGATAATATCAGATTTTTTTTCTCTTCGCATACTGATACATTAGGTATATACGTACCTTTCCAGAA
Marker36818	AATAATTACACGAAATTATGAAAAATACAATTTTATAAATATATGTATGAGAAATTTGGTCGATATTGGTCAGAATATCTGACGTTTA
Marker36858	CTGACCTGACCGGCAGCGATCTCGAACCCCCTCCCCTCCTTCTGAATGGAGGGCTCATCTCCAGCGACATCGGCGACGTCCTCGTCAA
Marker36866	TATTATTCGTCAAAAAGAAGGCAGGGCTTACGGAAAGATTTGCCATGGAGACCAAGGATGGCGTGGCCGGGTGGTCGCTAGCGTTGTC
Marker36878	CCATTGAACGACTTTTCCTGGACACATCCCGGCTATAAAAGACGAGGTATATTCAATTATATATCATTATCTTTTTTTACCTTGATAA
Marker36880	ATCCGGGACTACGTTAACCTTTCCTATATACCTACCATGTTACGCTGGGAGATGCTGGTCCTTTTCATTTGGGGTAGTGTGGGGGTCC
Marker36882	ACAGAGCGGTTGATCATGAGCAGCCAGAGCCAAGCGGAGCGTGTCAGTTTACTGTCATCAACGGGATTTCAGGTGCCAATGTGGAATA
Marker36888	CATCTACGTCCATTGATAGGTCTTGGAATATTAGCAAATGCTACTTTTTACATAGTCATCTACATCCAGTTTGATAATTATTACACCG
Marker36916	ACGTTATTCCTATATAAAAGCAGTAAAATTTTCTTAAAAATTTTTAAAAAGACATTCAGTATAACAAAATAAATAGTGCCTGTTTGGG
Marker36917	ATCCAAAATCATGCGAAAAATTAGAACATCTACCCCGATAGCTAGTCGAGAGAGTGAAAAAGCAACAAGTTCCAAAATTCCTAGTCTT
Marker36919	CTTCACTTGCGTGATGTGAACTGTGTAATCCATGAGTGGTCTAGGTGGAGAAAACGAATGCAGTTCTTCCGTCGGAGAAGGTGAGGTA
Marker36935	CCTCCACCCTTACCTAAAGGCAGCTAGGTATTCTGCGTCCCCCATGGGAGGATTGAGGGCTCCACCAAACGCAATGTTGACATTGAAC
Marker36970	ATTTAGCCCTGGTTTTTCATTATTCTGTGAATACTTGTGTTGACAGATGGAACAACGGGAGACATATGCCCCATTGGTCATTACTGCC
Marker36973	TTCTCAGCCAGGAGTATTGTCACAGGGGCGTGGCGACACCTAGAGGCGATCAAGTCGGTCACGAAGCAGCCAAACTTGTAGACAATGA
Marker36983	TTTTCCGAGAAAAATGTTTTTGATGATACAGAAATTACTGACAAACCTAATAAAAATATTCATCTCTCACAGCCATTCTGATAGAACA
Marker37007	AGCTGCTAAAACTACAGAATTAAGTTGGGGTCCATCTTAATCAACACACAGTTTTATACTAATCGTGTTATCCAGTATCAAAGTGGTC
Marker37028	TACAGCGAACCGTACGCGCATAATTTTCGCGCATGTAACATTTTTTAATGTTACCCGTTGCCAAGTGCGTTGCTAATGCTGAGGGTAA
Marker37065	AAAATCCACTGATATTCCCAAAAATTGACTGACATTGTCTGACATCTACTGTATAACCACTGTACCCTACTTTAAATCCACTGTACAC
Marker37137	AATTAATAAATGTTAATTTTAATAATTGTCGATTAGAACCTAGCATATGTGTTATGTTGCATACTGTTGTAAGAGCATGAACAAAATG
Marker37141	AAAAATTAAATGATATACGAAAATTCTTTAATAGTGTTGAAAATGTTAATTTTAAAAAAAATATTGCGATGAAATATTTTTCTGAACA
Marker37157	TTACCTTTCTTGTACTTGGACTTTCCCTTCCTCTTCTCGATCTCCTCGCAAGCCATGAAGTCCAGCCCCTCCTGACATGCTGCGACCT
Marker37169	ATAATACTGTTCTATTCTAAAATGACAGTTTTGTATCATATCACATGTTTTATTTAATAGTATACATGCTTTTTTAAAACATGTTTAT
Marker37192	CAGCCCCAAAGTCACTTAGTGCAAGTGGTAAATCCAGGTCATTTTCCAATTTATTTAACCTTAGCTCCGCAGAAAGTTCATATCAGAA
Marker37197	TACGTAAGAGTTATCTATCTTTACCAACATTGAACATTTTTGCTAATTTTGTGCTAAATAATCAATATAAAGTCAACTTTTTGTTATT
Marker37228	AAACTGAAGGGTTCACTATCTACTTTCATTTTAAACATGAAGTGTATGATACTTTGACAGTGTAAATTTCCACAATTACAGTGGATCA
Marker37230	CTCATTACAGCTAAATATCCTGGATACTGTTCTTGGTTAGTTTCTTATTGTAATGGTTTCTTTCTTTATTGAAGGTCATTACATGTAC
Marker37247	ATTATTGTAATCAAAGTCCCATAACTCCAACAAAAAGTATCGACCAATGCTGATTTTCGAACTTGACCAAGGTATTAGTGATATAAAC
Marker37257	CCCCTCTGCAGAGGAAGGCCATTCATCCAAGCACAGAAGCTTGATCCGTCCACATTCTGCTAAAGGCAAAAAGCCCTCCAGCCGCTCC
Marker37283	ATGTAATAATTTTTTTCAAAATAACAAGTATGGGCAATTTTTTATTGGTTTCTAATCAGGCTTTTATCTTTGCTTCAAAGGACAAAAA
Marker37319	TCATCCTCCTCCTCCTCTTCGTCAGACGAGTTGTTGTCCGGGGGCTGGGGAGACTGTACTGACATGTTCACGGGCTCTGTCTTGGGGG
Marker37322	CATCAAGAGCTGAACCAGACTGTACATTGGCGGCACTTGATGGAGCAGGTGCCCCTTCCTCGCCGACTGCTGAGGAACTCCCAGCCTC
Marker37343	AATCGTCCCCTTCCAAGGTAAACAAAATGTCCATTTTTATTTGACGAGTAATGTTGTATTTCTTGTGTCTTTAAAGGTATATCTTTCC
Marker37354	AGTGTGGTATCTTTAGGTATGAGATAACCTGCCACTGTGAAATCTTGAGATGTCACGTGAGGCAGGCTAAGCGGAGCTACGTTGCCCA
Marker37390	CATATATTGTTTTCATAGGACAGCAAGTTTTGTATGGTACTGCGGAGTGCACGCCTCGGACATACTGCCCTCAGCGACGCTCTCAGGA
Marker37405	TTTATTATATCAAAATAATTATAAAATTGTGCACTTTTCATCTTGCTTAGTTAAGTGGGTTAACTAATGTATTGTAATCAAGGATTAA
Marker37407	TACCCCAGAAACTCAGAGCAAGGACGAACAAGAAAGTGTGGGCCAACTTCTTGCTTATCCTGTGGGACGATATTATCCAGAGAAGAAA
Marker37428	TGTTTTTTGTCAAATACGACCCATACACCCCATCATTTAAAACAAAGAAATCAATGTACATGTATCGTTATTAATCAATTTCAATCAG
Marker37472	TGGCCGTGAGAGAAAAGGAGCGTTCACGTGATTTGACTTCAGCGGGAGATTACTGCGAGAACATGGCGACGGAACTCCTGGCCATTGC
Marker37487	CATGTTGCATATGTTTTCATCAAAATGGCAAACACGCCCCGCCCTGGGGTGTGGGCCTTGGAGAGATCTACGGACTTTGGTCTGTCAT
Marker37540	ATTCGGAATACCTCGTACATTTTTTCAACGTTATCATCCGGGTTTGTTGCAAAACAAAACCCCCATAGACATCAAATTTTTTAGCCGT
Marker37620	TTGTTTTTTATGTCAGACCTGAAGTTGCAAAATATACATAAAACTGAAGCTAGACTTCCCTTTCATCGTATCAACCAATTTCATGTTT
Marker37624	AGTTTTGTACAAGTGTTATCCATATTTAGCAACAAGATGTTAGTAAAAGATTTTCTGCTTTAATGTCTTAAAATACATGTACAGACAC
Marker37713	AGAACTAAATTATTGGTATAAATATAAAGTGCCCCGTGTGCGGCTGAAGTCCTGGAACCGTCTCAGATGCCGAGGTCGATAGCAACCT
Marker37718	AGTGTCGAGGAAAACCAACTCTCGTGAGATTATCGCGAGGCACGAATGACCATTCCGAGCCTCGGAAACGCAAGTCTCCACAGAGGCG
Marker37723	TGCGACCGCAATAGAAACACGTATATCCATGATAGTGAAATATCATCGAATGTTCCCGTAACGAGGCCTTGGTATTGAACAAAATCCC
Marker37727	CAAGCTCCCTACAGTAATTCCAGAGAGTTGTCTCCTCGTTGTCATGGGCCTCGTTGTGGGGGCTCTTCTCCACTTCACCAACATTGCA
Marker37730	ACTTATATCTTTAATTTAAACATATATGTTTAATTAATATGTTTAATAAATTTAAGTTCGAATTTTTACAAACCTTTCTTATCCGAAG
Marker37839	ATAATTTATAGAACTACTCTGGACCGTAACACTGGGTTTATACTTGTTAGTACCTGTAACATCTTGTCTGGACTGGCCTCCACCCCCG
Marker37851	TTCCCTATGGGATAGAAGAACGAACATGTCACTTATCGTCGGGTTATAGAGCCCTGTCTCCCTGGCCTCGGGACTGGCCCTGTGGCAC
Marker37859	CTGTAAGTACAAGGTGGGTGAGTGGGGACCATGTGTCCCAACCACACAGAGCAGAACCAAGGTCATGACCCTGGTACGGGGGAACGCC
Marker37876	TAGCAATAGATTAAAAGGTAGAAGAATTTCCGAAATTGATGAACAGCTGACCATGGACGTGAGAGGTGAAGGTCGTCGGGGCACGGTC
Marker38022	CAGCGAAAAGGTGCGATTCGGACTTATAAAGCATCAGATGATGAAAAATACCGAGTCGCTTCTTCCGACTTTGACAAGTACTGCACAA
Marker38061	AGCTCGTCGGAGGGCAGTTGCGGTGTGACTCGCAGGGGGCCGTTCGCGGTCAACGCTTGTCGCTGCTGCGATCTCGTTCGACGACGTG
Marker38144	CGTACTGACAGCTACAGAGCTCCTGTCCGTTACTGAGAACACACTCCCCGTGCTCTCCACAGTCACGGCAACACCGGTGTTCGCACTG
Marker38145	ATACTTGTTGAAGAATGTTAATGTCCAAACGATTGTTAAACGAGGGGTTGATTTATTGACACTGCGCCACAATCTGCCTGTAGAACAA
Marker38149	ACCCAGTGTTCATCAACCGCCCTGGATCATTTCCTCATCTCCAGCAGCTCCCTGCCGGACACCCCCTACACCCACGCCTTGTTTCTAC
Marker38213	CAGGGTCCCCCGCCTGTCAAGCAGTATACTAGTATACTGTATATTGGAATATTTTCAAACATTCAGGGCTGTTCCAGAATTAAATGTG
Marker38221	TTATTCAATAACCCTGTATGAGGAAATGAGATGTATCTGAATGAATGTACAATAGATGTATGCCTTATTGGGTCCCGCATTGTCATTC
Marker38224	AGGACTACACTTGGGAGATGCTGACCTCCAACCGTCAGTTGAAAACCTGTTCATCTTACACGGTGACACAATGTTAGAATACACTCTC
Marker38230	AGTGTCATATCTATGAGCTGTCCGATGATTACTGCCAGATGCCAGCTCAGGCCGTTCATTGTCGCTTGGGAGGAATTGCCAGTCAGTC
Marker38242	CGGACGTCCCCGGATTTCTCCGGCCCCGGCGTGGACCGGTGCGTGTTGTACATGTAAGACCGTGTATCAGGTCCTCGCGGTATCACTT
Marker38256	TTTGTGGAGCGGGACTTTGCGGTTGGGGAGTTTGGTGGCCATGGTCTCGGGGACCTGGGTGTTTGTGGGGACGGGGTCGTGGTTGTGA
Marker38268	CTCTCCATTCGGGTCAGGTAGCTCTCCCATGTTTCTTTACTAGACAGGAAGTCCTTAAAATGGACCCCGTTCTTCTGTATAGGGTTCA
Marker38301	CAACACCACTGCTCTAAGTTGGGGAGGATCCAGCTCCAACTCAGCTGTTAACTGGAATGGAGGGGGAGGAACCAGCACCAGCGCAGGG
Marker38316	TGTGTCGGCTTTTTTCCCTCGCATTCGCACGCTGAAACATTGTAAGTACGTCAACTGGAGCGACACCTGACGGATAGTTTGGCCAGTA
Marker38414	AACTTTTCATTTTACATGGCTGTTGAATTAAAAATTCGTGCAACGTCCACCCACTAGTTCAATTCATTTCATCATTTGTAATGTTAGC
Marker38417	GCTGGAGGAGAGGATCATGGAAGGGTAGTTGATGCACGGCATGTTGATGGGGAGGGGGACAGAGTTACAGTGTGGGTAGGGCTGCCCG
Marker38427	CCGCGGTCCTCGCACACAGCCCTGTAATGTATATATCCTCCAACCAGAAAGCTTTCACCCTCCCTGTGACCCTATACAGAGCTTTGGC
Marker38444	CAGGTACTCTATAGTTTAAGAAAAGCAAGAAATATATTCACAGTTTTATCTTTCGGTGAAAACCCAAAACTAATTGCAGCATCATAAT
Marker38453	ACCGAATGTCTGACGTCTAGTCGCGGTGGGGAGTATAAAGGAAAGGCCAACGTGACACGTTCTGGAATAGCGTGTCAGCCGTGGGCCG
Marker38456	AGCTGTAAAAACAAAGCCTGTGATGTCGTTTTCAAGGAGAGAGAGAAAAAGAAAGGACACAGTGCCGACGCTGTCAAAATTATGACTG
Marker38507	TAACATTTGAAAAAAAAAATTATGACTACTTGAATGTTTTTTATCAGAACTGATATTTTATAGAGTAAATTGTTTTTAGGAAACAAGT
Marker38529	TGAAAAACTCGACAGTGTTGAGATCGGAGACAAGTGACAGCGAGTTTCTGATGGTCCCTGACAACGTGGAGGGCACGAGTTACACGTT
Marker38530	GGTTACATTGTTTTGCTTGTCGTTCAAGAAGAGAGTAAACATGTCCTTGACAGCACCCAGCTAACAGGAAAAGTCGCCTTGTGGAGCG
Marker38548	TGATATTTCCTATTCTCAGCCCTATTACTCAAGGACTAGCCAACGAGACATTCCGTCCGGACTGTTTGGGCCCCTGATCATCTGTTCC
Marker38599	TTCATTATACATATCAAAGGCCGAAACGCCCACAAAGGCCTCGAGCTGACATTTTCTTTAAAATAGGTATCATTAATTTAAATTTCTG
Marker38681	AATATGGTATCTTATTGTTACAGTACATTTTCATAAATTTAAACAATAACCTTTGTGAATTTACGTTTTAACTTAATGCCACATTCTA
Marker38741	TAAATTTTGGAAATTTGACTTGCCTTGTAACGCCCATTCATGCATTTTTCACAAGTGGAAACAAGGATATTTACCCCATCCTTCCAAG
Marker38803	CATTCGCAGTTCTCAGCTCGTCACATTTGATTTCAAATATAACATTTCATAAGAATTTCAAAACATTTTGCATTTTTTACAAATTGGC
Marker38815	ACATCTTTGTATGGAACTCAAAGTACCAATAAAAGAAGATTAGCAATTTTAAAGACATCAATTATCAAATTAAAATTCAGTATAATAG
Marker38843	TTTGTTAAGAACAACCCTGATTTGATCATTAAAGTCTGAGGGCAGAATGGTAAAATAGTCGGAATAAAATCCCTGTAAAACAAATTCC
Marker38846	CCATCTACGTCCAATGATTGGTCTTGGAATATTAGCAAATGCTACTTTTTACATAGTCATCTACATCCAGTTTGATAATTATTACATG
Marker38885	TCCGGGGGCTGGCCTCCCGCCTCACCACACAGTTCCAGAGGGACGAGGTCAGTCATAGACCCAGAAACTTAAACTGTCCTATCACATA
Marker38934	CTTTCTAAAACACAAGTGTTGGTGACGTATCAGCCGACGCTACAACAGCAGGCCGCCCTGTCGGACGGGGGCGTGTCAGGCCAGTTCA
Marker38950	TCTCTCAGTAAACAGAACAGTTTTATTACCTGTAGCGGCGAGTTCCTCGCAGATGTAATTTCCCTCCCTGATAGAGAGACCTCCAGGG
Marker38955	TCAAGTTCCTGAAGAAACATTACTGCAAAAGTGGTTGTTTACATGTGGAGGAAATTTACACTAGTTACATTGCAAGCTTAAAAACTTA
Marker39117	CTCCATTTCCTCCTCCTCACTGGACCCGTAAGGCTCTAAATGCTCAGCAGGCTGGTCTAGCGGTTCGTCCCTCTCAACCCCCTCGTCG
Marker39126	TCATAAAACGCTATGAATTATTGTTTCAACACGTCATTGGGTGTCTAAATAGAAACGTAGGGCGTACTGCGCACCGCCTACGAGTTTC
Marker39194	ATTTGTTTGTTAGAAATGATAAAAGGAATGGTACAGGAAAAGGAATGGTACAAGTAACGCACAGTATACTGACTACATACTGACCTCG
Marker39281	AGAACCGCACGTTCCACCAGGTGGTGTCCACCTCAAGTAGCCATGCGGGTCCGCAGCACACTATTCAATTCCAGCCGCTTCAGAGTAC
Marker39292	ACAAAAGAAAGAATTTGTTGCTTAAATAACAACATTTTACATCAGTGAATGTGATGCTATTAATGATATTATAATTGTAACTTGGCAT
Marker39423	AAGTACGATGAGAAATAACGTTTCCGAACGATTTTACTTTCCACTACACGGGTGCATGTAGTGGGAAGAAAAAATGTAGTGGGATAAA
Marker39479	TAAAATTTAATAATATAATATAAATCGGTCGCCATCAAGTCAAATGCCTCCTAAAATGCACAAGAAAGGCAACCAAATCGTACGGGGG
Marker39491	ATAATGAAAATTATGAAAAAAACTTCATAAACATTTCTGTACAAAAAAAATACAGTTAAATGATGTTGTTCGTTTTAAGCCCCTTTCA
Marker39510	ATACGCAGGAGAACCTGGGTCTGTCGGACTTCCGGGCCAAACCGGAACTCCGGGGGCTACGGGACTTCCGGGGACGAAGGGTGAGCCG
Marker39524	ATTTGTTTGTTAGAAATGATAAAAGGAATGGTACAGGAAAAGGAATGGTACAAGTAACGCACAGTATACTGACTACATACTGACCTCG
Marker39609	AATCTATATTTACAGTTTTAGTCAACACTTTCCACAGAAAGTATGGCAGTAAGATCAGTAAACATACTCTGGATTGTCTACCTGATCC
Marker39629	CCATAATTTGGTATTGACTTAACCACAATGTTCTGCATTCTACATTGTAGTCTGTGTGAGGAGTTGGACCAGCAGGTGAGGATGATTT
Marker39634	TTTAAACAATTAACAGAAGAGGAAACCAATTTGATATCTTGAACTGAATAGGAAGAGTTGATTTTTACAATCGTCTTTGATTATAATT
Marker39644	TACAGCGAACCGTACGCGCATAATTTTCGCGCATGTAACATTTTTTAATGTTACCCGTTGCCAAGTGCGTTGCTAATGCTGAGGGTAA
Marker39646	CTGTGATCTCCATCTTGAACGCCTGGAAGAACAGGTAGGACTGTCCACTGGGGCGTTCCACAGAACAGCTGAAGTCCCGGCCGTCCTG
Marker39709	AATTCGTTTCTTCAGTGTGCGATTTTAGTTTTGATACTCATTCGCTTGCGAAGCACGACCTCTGAGGTGTATTCATCAGAGAGAGCGC
Marker39805	GACGCGAAACATCGCGGTGCGAACCATCTCGGCACAAAACGGAATAGGTGCGAAGCATCTCGGCGCGAAACATGTTAAGGTGCGAAAC
Marker39847	TAAATTTTGGAAATTTGACTTGCCTTGTAACGCCCATTCATGCATTTTTCACAAGTGGAAACAAGGATATTTACCCCATCCTTCCAAG
Marker39982	CGGCTGAATATGTCCTCCAGTCGTGGGGTCAGAGTGGAGGAGCCACGGTCCGCATGCTCCACCGACATCTCATCTCGCCGCAGATGAC
Marker40091	AGCGTGATTTCATTGATTGGCAGACCGACCGCCGTCAGCACAATCGTCATGGTAACCAGTCCGGCTTGTGGGACGCCGGCGGCGCCAA
Marker40157	TTTAAAGCGAGGAAGCCTAATATCCCAAGTCGATAGTTGATGGTCACAACAACAACATGCCCAGTTTTGGCCAACATGCTCCCGTCAT
Marker40205	CGTTCGAACTTTTCAGGCGGAGTTTCCCGTCGAGCCACGCCGGTATTACCACCTTTGGAATGCTGTACTTGATAGTGAGTAATTATTT
Marker40277	ATTGTTAATTATTATATGTAGTGATAACTTACAGATAATTTCTAATTTTCCAGAAGCACAGTCGTTGGGACGTTAACCTTGACATCTC
Marker40306	CAACTCCAATTTTCTTATTTGAAGGAAATTTCAATCTTTCAAATGATCTTGTGTCTGAATGCCTTCTTTTACTTACTGCTTTTGAGGT
Marker40341	ACACATCAGTGGAATTTAGATTACCATGACGACCACCACGCATCCGAAGGAATGTTCCATCATTTGGACATCACTACTGACGGCTGCT
Marker40382	TTTTATATATGATAGGAAATCGCCCTACATTGGAGCCCCCCTCCCGAGCCCCCAAGGACTGGGGCCATCACAGAGTACATCGTGGGTT
Marker40384	ACACAGTTTCATCCTGTTGTTTGACTTATACAGCCCCTCCATGTGGAGACTAAACAGTCCTCCTAGATGTAGTCGATCCTCTGGCAGN
Marker40408	CAAGAAGAGATGGCAGTGTGATGTCTTTCTATCTCTCCCTGCTCGACCAATCTCCTGTACGTAGCTTTCCATGCTCTTTGGCATATTG
Marker40419	GACTAAATGATGTAAAGAATAATTTATTATTCACTTTGGAAAACATGATATGATTGGAAATCATTATGGATTAATAGGTTCTAATTTT
Marker40453	AGTAATCTTACGTTTCAAAAACCACAAAAAAACGTACTTGTTTATTCCCAGAGAACATGAAGCAATCATTGGTGTCCATAGCAACCTC
Marker40454	CATACATCTGTGATATACTCTATCCGACACGCTTGGTCTTTATTATAGGTTGTTAAACAAAGTGACCTGGGACTACCGCGGTGAGCGA
Marker40470	ATGATTTTGTAGACCAGATCTTTTAGTTTTTCACCAAAATTATAGGTTTCACAGTTCTTTTTGAAATGTGGTCGTCATTACAAATTTA
Marker40482	TTGGATGGTCTTCCTCTCCGTGGCTATAGGTGCGATGGCGGGAATGATCACGTCTGCTCTACGGTCCTTGGTCAGCAAGGCCGTGCAC
Marker40500	CCCGAACAAGACTTCACCGGGTAAAGGTTCAGTTCCGACACCTTCCCCACCCTCACAAACTGTCCCCGCCTGACCCGGCTCGACCACA
Marker40527	TACGGAGAACCGTACGCGCATAATTTACGCGCATGTAACAATTTGTTGTGTTACCCGTTGCCAAGTGTGTTGCTAACGCTGATGGTAA
Marker40545	CATAGATACTTAAAGGGTTCTAAATGGTTATTGTCCCCCGCTGCAACGCGGAGCGGGGACATAGAAATGCTGGGCGTCCGTCCGTGTN
Marker40613	TCGGCCTCACTGAACCTCACCGAGACCCAAGTCAAAATCTGGTTCCAAAACAGGAGGGCCAAAGCCAAGCGTCTCCACGAGGCAGAGT
Marker40624	AGTAGTTCTTGAGAAGAAGATTTTTTAAAATGCACCCCCCTTTTTCTACAGTTTCAAGGTTTTCTCCGCTTTGAATACAGATCGGACT
Marker40632	TTTTTACTTGACAAGTTTCTATTTCCCAATTCAACTACCAACACATATCTTATATTCAATTCAACTACCATACACATTTCTTATATTC
Marker40646	AATGTAATGACACGTTTAGAGGATGTCGAACTTCACTGACAGTACGCCAACTTGTCAGGTTTATTCTTAAAATTCTTTATAAATATCA
Marker40656	GAACTCGCGATGTATGGATCACAAGACAAACAATTTATCCACTCGGCTATGGAGTAAGTTACATGTTGAAGTCGATAAAATCCTTTTA
Marker40662	CCTTGAAAAGGCCCCTGTCATCTTTATCATAGAGAAGGCTAATCTTTCTCCACCCGTATTGCTGCAAGATTTCGTGGTCAATGAAAGC
Marker40667	CATTAGTGCGGTCCTGTAACAACGGGGCCTCGCTACTTCACCACAGTATGACAACCCTTAACTACGCACATGGCGGTCATTTAATGGC
Marker40668	TGGTGTTAAAATTACCAAAATAATTTCAAACATAAAGAACCACTGGTACTTCAGCCATATTTTACTTTCATTAGAAACATAAATCACG
Marker40670	AGAATATTGAACACTGACATAACAAATGTCACATCCCATGATGCACTTCTTGAAAAACAGATATAAAATTCAAAACAATGATGACCCA
Marker40711	TTTGTTGAGCTGAGAAAATTACGGCGATCTGATTTCAATTACTTTCTTAAATTTTGATTTGTTTCTTCATATAACAAAACAAATACTG
Marker40751	TCCTTCAGCATCGATATCATAAAATATGACCCCATTGGCTTCCTCAGGTGCATTCCAGTAAACTTTGACTGTCCTGGCATCGACAACC
Marker40755	TGGTGCCCTGCACCACCAAGGGTGGGTAATTGAGGGAGGGGACTGTCTTCTCCACTGAGTACAGGGGAGCTGGTCCATTGAGGCTAGC
Marker40833	ATAATCAAATATGTAAATGTAATCAACATGTTGGTAGACATTACTTTTCTCCGTTCTCCTGCCCGGGTATACTGATCTGTCGACCCAG
Marker40834	ACATGCGGGGAAGTGTTCATCTCAACAACCAGTCCACCCCTATAGCTCAACAAGCACAGAACTTCCAGCAAACACCCCCCTCGGGAGG
Marker40846	AGAAAACTCTGTTCTATATAATGATCTTTAGTTCTCTACATCAGAAACAGACTGAACACATCTTAATGCCGCAATAGTGCTTGTTACA
Marker40864	TTTTAAAAATCTCTGTTTGGCTTTTTCAAAAGATGGCAGCATTTTCTGTTTAAAAAGTTTGATGTTTAGGAAAAGGAAATAATTTAGA
Marker40955	ACATTGCACTGATCCTCGGAACCCGTTGCTGTTTGAACATGTGAATATGGCAAACATTCCGTGTCTCAAAAATGAACACCGATAACCG
Marker40966	AGGGGCTCGGTGTCGTTGAAGAAGTTCTTCAGCACTGTCGCCACTGCGTTGACCTGGATGTCCAGCGTGTGGATGTCCAGCGACGGAT
Marker40984	AAACTTTTATTTGCGTGCGAGGAAATTTCGCGACGTTTTCACCAACGCCGCAACCCAGTCCTTATTGTAAATGTGTAATAACAAAAGG
Marker41073	TCTGTGGAGAGGAACCCTTACTGGAGACATGAGGTTATTCTCACGAATAAATAAACACCTTGGGAACCACCGAGCATGCTCCTCCCAG
Marker41086	TGTAAGTAGGAAACATTGGTTAATTAAAGTGGATTATGTCAGGTTCTTCGAATGACAAAGTGATAGGCCAAGTGGCATAGCCAGATTG
Marker41142	GCATCAGCTGAGCAAAAGTGACGTTCCCACACCTTCAAATACCCGCCGGCGACCAGAGTTTGACCTGACCTGTTGATTTCTTAGTCAA
Marker41148	CTTACACAAGAAGTATTGGTACAGTGCAGTATCCCATTAATAAGATGCTAGCGGTGGCCGGCAAGCTATGGTGTGGGTGTCAGAACGT
Marker41207	CTGTGGGACTTGGTGCAAATCTAACCCTTACATCCTTATCATACTTGAAAGATGATGCCGTGTTAAACTGTCGTCTTATTTGTCTTCG
Marker41222	CAGCTGTCACTCTGGTCTAGATCCAACAATTCCTCTCCATTGAGCATCTCCTCCTCAAGTTCCTGGGCACTCCAGTCTCCACTGACCA
Marker41244	TTCACTATATATAAAAGCTTTTGTGTAAATATTGGCATTTCTGGTGCAGTGGTTCTTGAGAAGAAGATTTTTTAAACATTTTCCTATG
Marker41264	TCCTCCGGGGGGTACTGGAAGTGATAACGGAACTTCTCCTTGATGTGGATGCTCGTTCTGGTCGTCTCCGCGAAGAACTCGATGTTTT
Marker41269	GGCCAACAACGGCAGGTTGTCGTTTGTGTCACGCTTTAAATCACGGTCCTGTACACGTGGCTCCCACTGGGGGTCAAAGGTGAAGGGC
Marker41318	TTTGACAGAGAAATCAAGAAAATAGGAGTTGAAAATACTTACTTCCCTATGTTTGTCTCTCATCAAGCACTGGAACGGGAAAAAACTC
Marker41322	ACCTTCGACTAGTGGGGTCACATCCCCGGGGAGGCGGGCTAGGGCGGCATCGCCCGCGCGCATCACCCGACAGGAGGAGAAAACTCAG
Marker41325	TCACTGTAAGACAGGTAGATTGAGTACCTGCGAAAAAATTCCAAATCACGACACATGCAAGGTGTATGTTATTCGGCCTGCCGGCTGG
Marker41356	TATATGTATGGTACTTAATTCAAATAGATTATGATAGATATATTGTACGCCGTTATGCAGGGCGCCGGTTATGTATACGAATATAGAG
Marker41379	ATATTGGAGGTAGCAATACAGTGATGGTGTCACCCCAGCCACAGTTGCAAGCCCCTCCACCTTTGGTTCACAATGCCTCACATTACTC
Marker41507	AAATTCAGAGCAAAATGTCATGAATTATTCGAAAGCTTGTCTGAAATAAAATAAAAAATTGGTTTTTTAATAAAGATAGTCCATTTTT
Marker41508	GTTTCAGCTGCCTTGTGTTTCTCTGAACTCCAAATCTTTGTCCGACGGGCGGGCTGTGAGTATGGCTACCTCCACAAAGCCTTCGGTC
Marker41519	TGACCACCGGACAATGGGGTAGGGGGCGGGGCCCACTCCAGGTGAACGGAAGTACCGACTTGGTTACGGATTAGTGGCTTTCCAGGCG
Marker41535	TATATAACCCATGTACCCCCCTGCGGCCTCACAAGTGAGGGCTCCGTCGTCCGCGCTCTGTGAAGATGGCGTTAGCCAGTAGCAGTAG
Marker41538	ACATCGTACCCGCCAGCATCACTGATGACGAGATCAAGAGTTCGGCTGGCTTCCGGTCTCTCAAGAGGTTCCCCTCCGTGGTGTGGAG
Marker41540	TGATGTCCCAGAATTGCCTGGACAGGCCAACCAGTGGTTACAGCTCGACTCGAGCCCAATGAGTGCCAGGGCCCGCAACAGTGGCCAG
Marker41597	CGGAAGAAGAGTATCCCATATTGGAAGAGAAAGGATGGGCGTTTCCCGTGACCATATGAGCGTTCATGTGCGGTACCTCGGGATACAT
Marker41598	ATCATCAGAAAATTAGGCTTTAATGGGGCTGCGGTCATTGAGGGAGACTATAAATGTCTACAATAAATTCCCCACCTCATTACAGTCA
Marker41661	GTTTTCAGACAGCAAGTTTGACTGCCCGTAGCATTCCAGGGCTTCGACCAATTAGTCCAAGAACTGTGCGTAATCGTCTGCGCGAGCA
Marker41767	TCCAAGGCATCATCCGAGGGGGCCATTTCTAAAAATTTGAAAAAGAAAGTGGCTTCTAAAACTGTGTCCGATCCCTCTCAAAGGAACA
Marker41779	ACGTAAGTCTCTTCGGTTATTTCCGAAGACGTTTTACGTCTGAAATATGACGTCATAATATAGACTGAGCACGCGACATTTAGTTTAA
Marker41799	ATGACATATTGTTCTAACTTCATGTAGTTTTGCGACCAATTTACAGTTCATGAAGGAAATTGGATTTTTTATTCAATTAAAGACACTG
Marker41823	TAACACTACTGGCTCTAAAAACCCCTGTCCGTATGAAAATCCCCTGTCTTCCCCTGTCATCCCCTGTGTTTTCACTGCCATCCCCTGT
Marker41858	ACCCTGCTACAAAATTCTTTGCTAATAAAAATCGTTTAACCTTTAGATCTGCAGGCACCCAGCAGGCACTGCGACCACAAGCACCGGG
Marker41873	ACAGACTTGTATTTTGATTTGGATGTTGTCTTAATGTTAATGAATTACTACAAAGCATATATTGTGTGTCATCAGGCGCCGATATCGG
Marker41890	TCGCGAAAATTTAGGTCTTGCAAGACATACACAACAGCGACCCTGACCTTGAGGCCAAAATGACCTGGTCCATCAAGCTGGTCAAGAA
Marker41982	AATAACACATACAATTGGCACAGGTTCCAAACCTTAATATTGTTTAAATCAACTGCTGACTTTCACAGGCCGTATAACTGTGGGGCAG
Marker41985	GCACCAGTGTTCACTCAGAAAAAGTATGCATTTGAGGTTCCTGGAAATGCCAAACAAGGCCATGCGATCGGCAAGGTCAGTGCCACGG
Marker42014	ACATTCAATGACTTCCGGTAAGTTGAATGTAGTTGTACCATCCAAGGCTTTGACACATAATCCGTTCACACGGCGTCCAGCGACTGTC
Marker42038	ATTCTACAACTTGACTGATTTGCCTTAAACAATCAACAAAATTATTGATCTTAATATGAAAAATTAACTGCACTGTAAAACCACAAAC
Marker42039	TTGGACTTACGTGTGGTATTAAGTGAAGCATGGCGTCCCCGGACAGAGCCCCCACAGCCAGGGCGACCAAGAACTGGAGGACGGTGTT
Marker42121	CTTCATCACTTGGTTTATTTCTCTGGAACTGCATACTGGTGGACCTTCGGGAATACGGCAAACCTACCCTTCGTTTTTACCTGACGGC
Marker42183	AAATGTCGGGCCACGTTTTCGGCCGTTTTGCGAGTATTTTTGGATTTCTGAGCGAGTTGGTTCATCTCCTCTGTGGACAGCGGCGAGC
Marker42201	TTATATTCGGGGTTTAATCTGGGTTCTGTTTCTTTTAAGTGGACCCGCGACGATCTGGCTTGAAGCGAGACGGGGTGTGCATACACCG
Marker42222	TACGTAAGAGTTATCTATCTTTACCAACATTGAACATTTTTGTTAATTTTGTGCTAAATAATCAATATAAAGTCAACTTTTTGTTATT
Marker42276	ACAGATCTGGGGGCCAAATCTATCGGGGAGGCGCTGGGGACAGTCAAACGGGCCAACACTAAACTGGTCTCCCTCAACCTGGCAGGGA
Marker42339	TTTGGTTTTGAATGTCCCTCGTACGATGATCCCCCACCTCCTTACACTCCTCCAAAGCCCCCAGACCAAATGTATCCCAGGGAAGCTC
Marker42421	CTTGGAATTTCCGGGACAGCGCTGGTTACACACTGCTCCTGTAGTTCCATGCTTCCCAAAGGAGTTCCCACACCAGCACTCCCTCCCA
Marker42487	ATTTTAAAAATAGCGAATTATGGGGGCCAAATTTGACTTAGATAAATTTTTTTAAAAGCATCTGGTAGTTATTGAAGACTTGATGTGC
Marker42554	CTCATCTAAAACTTCTATCAAAAAGCCTTCTGAGAAATCAAATGCACAAAGCAGAAAATTTAGCAGAAATCCTGCACCACCATCAAAC
Marker42589	ATGGCAGACATATTGCTGGTGGGTCGTGACCTCATACTGGAGACACCAGAGTTTGGACGTGAATTGCAGAGACTAGAAGCGTCGTTAC
Marker42611	CCAATAAATGAACAGAATATCGACGAAGACTTGCAGAAAGGTCAGAAATTTCCCCCGAAAAGACCTCCACCGTGGTCAAACAGTCACT
Marker42674	GCCGTAGGATCACAAGGAAAATTCAGAAAGGCGTTCTTACAGAGCTCCCAACTACGTTTCCACAGAGTTCTACTTGGCGATTGACTGC
Marker42687	TCAGCCCTGCTCAGGCCCAGGCCACAACCACCACCCAGAGATCCACCCTCAGCGCCTCACAGATCTCGGCGCTGGAGGCTGCCGCCGG
Marker42741	GACATATACCCTGTAATTATGAAGCCATGATACATGGAGAGTAGGTGTAACTTATTCTCGTACCTGGGCTCGACAGCTTGGTTGTGGA
Marker42754	GCCCTGACACCATTCACTTCCTTGTGAATGGTGTTTTCGACCAACTCGTAACAGCGACTAAGAGGAACAGTCCGGTGTCTCCACTATT
Marker42802	AGCGGCGCTCGGTTCGTGGTCCCCAGTGCTTCCTGGGTCTCCAGGGTGATGAGTGTTCATCCAATCTGACCATCGTGGTCGGCATACT
Marker42806	GAGAAATAAAGAACTCGTGTAAAATAAGGAATTTACAGTATATCGTACCTTTCTCTGGCCAAGCTCCTGGTAGAAAGTAAAATTCAGT
Marker42813	ATCTTTTTTCAGTAACATGGGAACAGTCTATAAAATGAACATTGTGTATATATATATTATTTATGACCTTGCTTTCATTTGTTATGAT
Marker42909	TGTAGGTTGAAACTTTGGATTATTAAAGTTGATTAGGTTGGGNTTTTTTTATCAAGTAACAAATTGATAGGCCAAGTGGCATAGCCAG
Marker42925	AACAAAAGAAACATGGCCGCTTACTGTCAATAATGACAAGGCCCACACTGCTGGGTTTCCTGGGTGTCTGTACTCAGATGCCATACAT
Marker42958	AGCTCCAGCTGCCTGGGGGTCAGGTCCAGCCTGCAGGGGACGGGATTGTGGTCAGATGAAGAGGAGTGTCTGTCCAGAGAGTTGCCAC
Marker42960	GATCCAGACTACGATTATGGGTACACGCCGCAAAGCGTTGCCAAACTGTCCTTACTCATCGCAAGGTTCCTGCTGAAGAAACCGTCGT
Marker42973	TGTAAACTGTCCAATGTTAATTATATGTTTACGTCACCCTTCACATTTACATGTATAAGCTGCAGGCTTCAAATAAAGATTTTGTTTT
Marker43027	TCGTCGCTAAAGCTAATCTGTATTCTAGAACTCTCGTTTTGCTCCGATGAACATGAAGATGTACTGGATACGAGGCTGTTGTCGGCAG
Marker43049	CCAGCACGCGCAGACAGTACAGGTAGTTCTTCTGGATGCCGTAGATCACCGCCTGGTCCTGCTTGCCCACACGCACATCGGACGCGGT
Marker43063	ACCGCAGAGACATCACAACATTGTAGACGCCGTGGAGGAAGTGATGGAGGACATCCACTGCTGCGTCAAGGTCCGGGACAAGACCAGC
Marker43078	ATGATTTTGTAGACCAGATCTTTTAGTTTTTCACCAAAATTATAGGTTTCACAGTTCTTTTTGAAATGTGGTCGTCATTACAAATTTA
Marker43093	AAATGCAGTACAGACTATAAATTTCACACGCGGTCTTCGCTCGGGTGCACCCTGTGCATTATCTACCTGTAGTGTAGTGTGTATAGGC
Marker43104	ATGTTTCAGAGATGATACTCCGACGATCTATATGATAAACGTTCAGTTTATAATTGCACATTAAGCGTGCCTATATATAATGATGCTA
Marker43137	CGACATGCGTTCCGCGTTCAGTAGCCCGGGAACTGATGACCCCGCGTATTTAACATAGGCCGGCGACCGGAACTGGAACGCTTGCAGC
Marker43165	CTAGATCCGTACATGTGCAGTCCCAGTCAATGTACGACATGTTGATGGAGGTCAGAGATTTCAACCCACTGAAGAGGTTATAGGAGAC
Marker43167	ATATTAAGTTTGAAATACATGTAGATGTATTTAATTCGATTAATGTACATTTAAAATGTTTTCAATCACACCCATCCACTTCCTCGTC
Marker43254	AAAACAACAACTACCAACGCATGCCCCGTCAGCGAGGTTCGTTATCACAAACGCAAAACCAGCCCCCGAAACCATCTGTATCCATGGA
Marker43264	ATGATTTTGTAGACCAGATCTTTTAGTTTTTCACCAAAATTATAGGTTTCACAGTTCTTTTTGAAATGTGGTCGTCATTACAAATTTA
Marker43267	ATGATTTTGTAGACCAGATCTTTTAGTTTTTCACCAAAATTATAGGTTTCACAGTTCTTTTTGAAATGTGGTCGTCATTACAAATTTA
Marker43279	GATACTGCCAAATTGTTTTGATCATGCCATTACTGTCTTTATACATGTTTCTTACGAAGGAGAAAATTTTCACTTCCCGCTGTTTTTC
Marker43293	TTGGGAGGACTGGGCAGCAATGTGGACGATCTGTTCCTTGACCCCGTGTCAGGTAGACGAGTGCTTGTGCGGCCCGTTGGTGTCGCTA
Marker43306	CATTACTAGTAAGCAGTAAATGTAGTGGTAGACACGTATGAAAAGGAGTTAAAGTACACAGTCGTAAAAGAGGGAACTTTTCGTTGTA
Marker43343	GGCCCGATTGAAGCGTCTGCCGGAGACGCATCCTTCCGCATGACCTGGACTAGTGCAGTGTGTGTGTATGGCACCGTGGCCCTGGTTC
Marker43344	GGCCCGATTGAAGCGTCTGCCGGAGACGCATCCTTCCGCATGACCTGGACTAGTGCAGTGTGTGTGTATGGCACCGTGGCCCTGGTTC
Marker43353	AATGCCCCCGACCAATCCAACAATATTGGGTCGTGTGTCCATTGCTTGGTACAGGGCTTCCTCCGCTTGCGTAAGGGGCGCCGTTGGT
Marker43411	TGTTGGTTCGGCCATGCACTCATGTTTTCTTAGATGTGAGAGTGACCAGCAATGCGTCGGGGTCGAGATTTGCACGATACGACCGGAC
Marker43432	TTAAGATTTGATTTGAACTTTTGACTGCAGTCAGACTTACAGTTATCGTAGGCGTTGGGTAGAATACGGGACTGAGGAGTAAACGCTT
Marker43433	CCGACAGGTTGGTCGTGATGCTGGGTATTCCCATCACCGTACACTCCGCTAGAGTTAAACAGGACATGATCAATCAGGGGGTGCCTCT
Marker43472	GCCATATGTGAAGCGTTTTGGGGACCCGCGTCCTGCTCGCGAGCGCGCTTGCTGGGAAGTTTTCATCTGCATTGTAAATGATGAAACA
Marker43494	CTTTCCTGAGTATATCGTCCTCGTATTTTGCCTCCTCTCCCTTTCTGTCCGCCCGCTTGTCATCGACATACCCGTACAGATGACCCAG
Marker43500	CAATTCAAACATTAGTCCCAGAGACCTACACAGTTATACTATGTCATCAAGTTTTAGCAGGGAGAGGGTGACAGACAGGGAATACCCT
Marker43553	GCACAGCCGCCCTTTTCCTTAAATGGGTTGTCTCCGGGTCTCGGAAATCCTCGGATAAGTACGTCATCCTCTGCATTCTGTTCGCAAT
Marker43580	ATTTTGATTTCTGACATCAATTAATTTTTTTTCGTTGGAGATAGAAGGGGCCCTAGGCTGGGGCCGTACTGACCCGGTTTGACTGACG
Marker43692	ACTGGTAACTGCTTGGTGATTTCTGGTTCTCCTCCACGTCCCCAAATATGGCCATCCACCAACAGATTGGCTGGAGGTAGTCTGCAGG
Marker43697	CTCTTACAGAGCAGGAATTGACCAATATGATCATAATGAGGAACTTAGTGAAATCTCCCGAGGGAACTCTAAGTGCGGCAGAATTGAC
Marker43705	AGATGAACACGAAGGCAGTTGAAAAAATTGAAATAAAAACCTCCATGTTTTCACATACTCATAATCATACTGTAGACCCAGATTTGTC
Marker43714	TCAAAACCTCTAGGCTCAGTAAATATTATTCTTTGAGTGTAGATGAACCATTATTTTCACCTGAAAGAAGTAACAATTGTAAGATACG
Marker43715	CTCTTACCAACAATTTCCCAATCAACTTATTTACCACCTCTCGCTGTCTTTCAGCTGCCGAACCCCGAGGATGGAGTGTTGGTCCACG
Marker43746	TACACTATCTGAGGATGCTTCCACTCAAATTTGGGCTTTCCTGGCCTAAAAGTTTTTGAGGAGAAGATTTTTAAAGATTTTCTCTATA
Marker43853	GGACGAGGTATGAGTTGTCTGGAACCTGTCTACGCTTCCTGCGGGAACTGATGTCTCCGGAGCAGTGGATCTTGACGATCATGTTACA
Marker43898	CTTCTCGCACACTTCACACTTAAAAGGCGGTAAATCAGTAAACGCGGGTTTGGCCTGAAAGATGACCCCTGACCGTATAGTGGTGACG
Marker43902	CTTGCGGAAGTTCCGTTATCAGGAACATAACGACGACGGCCAAAAGCATGCCGGTCGTTCGGTTGTGCTCATGGTGACGATCGGCGTC
Marker43962	TAAAGAAATCTCGCAAAGAAGCTACAGAAAATTCGTTCTCCGCCAATCAGCGCCCGCCTTCCTTTAAGTCTCGCGAGACATGGAACAC
Marker43975	CGTCCTTGCACGGAAATGGGCGTGCGGGTAACGTCCTGCAGATTGCCGTTGATCCTAAACCACGTTGGGCGCCATTTTTGTAACCGTT
Marker43980	TTCACTATATATAAAAGCTTTTGTGTAAATATTGGCATTTCTGGTGCAGTGGTTCTTGAGAAGAAGATTTTTTAAACATTTTCCTATG
Marker43997	CTGTTAAAATCTATCGAGTATCTTACAATGGACCCCCGAAGTGGGGCCCAAGATGTGTTACGGTGTCATCTCTGTGAGACCCCGGGCC
Marker44034	TTGTGTTTGGGACTTGGTTGTTATAGATTTAGAATTTATCCAGCAATGTCAACAAATCCGTCGGGGGGTCAGGACCCGCTTTCACCTG
Marker44036	TTTTGTTCCCCTGTCCCCTGTTGTTGTACAATAAACATATTACAATGCCGAGTTGGCTGTAGATTGGTTAATTAAACCATACGCCGAT
Marker44037	GGAAAATGTTTTCGCCACCTCTCAAAAAGCAGCTTTAAGTATTGAAAAAAAACACACCGAAATTGTCACCCCAATTATTCATCCAAAC
Marker44062	TTTGTGTTTGCAGCTACATAAATAAACCCGTGTGTGCATTACAGCAAGGCGCATATCTTGTGTATTGGATAACGGCAGACCGCTCGCT
Marker44073	TACAGCGAACCATACGCGCATAATTTTCGCGCATGTAACATTTTTTAATGTTACCCGTTGCCAAGTGCGTTGCTAATGCTGAGGGTAA
Marker44110	TAGTCCTCACATTTGAAATCCATGTATTGGTCAGAAATGAGTGGTCACCTGTTGGTTGCAATGTGTCCTGCCGAGCGCTGTCTTGTTG
Marker44170	AACATGGTCGGACATATTTATTTTAGTACCCTTTTCAGTTTCGAGGCATGTGAAGATTTTCGACGTCTCCTACGATGTCCCTGACACA
Marker44181	ATTAATGTAAAGCGTGTTCGATATAATAACCATGTTTTTTTTAAAGTGAGATTGGATTATAAAACCAATATATTTGATATTTTGGTAA
Marker44185	TCCGTTACATAAGTATCAAGCCTGAGGAGCCACACTCACCGGGTCCTCATCTTCCTGCGCGCCCTCACTTGAGGACCGGTCCGCCTCC
Marker44323	CAGCGAAAAGGTGCGATTCGGACTTATAAAGCATCAGATGATGAAAAATACCGAGTCGCTTCTTCCGACTTTGACAAGTACTGCACAA
Marker44344	GAATATCATGCCACTTGGTCTACCTTCCGCCAGCCAAATCCGGCGCATTTCTCACTCTTTAGTGTGGAGATGCTTTACATCTTTTGTC
Marker44366	AAGTCTAGTGAGATCGTCCGACATTGATAAATTGCATTGTGGGTCGAAATTTACTGACGCCGAAAAATTCTGTGGGATCAATGTGCAA
Marker44444	TATTTATTCATTGAATATTTTTTAAATTTTCATTTATTGCTACAATTGATGGATTAATTACTCTATATACAGGTACTTGACAAATACA
Marker44493	CTCAAGAAACTTTTGTTGCAGTTGGTCCATGGCACTAGAGTTAGGAGAAATGGAGCCACTGGAATTGATGGAGGCATTGTCACTGAAG
Marker44541	CCCAAGGGAACCAACTGCCATAGTTGCCCCACCTCCGGCGATTTTAACATATTTATTGTAGGAAATTCTGGAAGCTGTGACATCTGGT
Marker44543	ACGATGCAGCGAATGTATTGAGGATCTTGACGGCTCTGACGGACCCACCTTACAGCAGTTTCCACCAAAGTACGGCCCCATTACTCTG
Marker44570	ATGCATTATATATGCAAAAGGAACCATGCAGTATGCAATTTCATTATATTCAAACTTATGAATACCAGTATTGTCATTGTTTCTGTGT
Marker44571	ATGCAGTATGCAATTTCATTATATTCAAACTTATGAATACCAGTATTGTCATTGTTTCTGTGTATTATTCTGTACTGTACATGCTCCT
Marker44578	ATGTCAGCTTTAAATACGAGGACTATTACATGCATTTTAATGTATTAATTGATGTTGCTGTGTTGTATTTTTTTATTGAAAGTTTTGA
Marker44601	TTTGTTGAGCTGAGAAAATTACGGCGATCTGATTTCAATTACTTTCTTAAATTTTGATTTGTTTCTTCATATAACAAAACAAATACTG
Marker44905	CACTGTACCCCACTGTACGCCACTGTACAGGGCACTGACCAGCACTGTACCCCACTGTACGCCACTGTACCGGGCACTGACCATCACT
Marker44988	GGGCTTTTATCTGTTTCATGTTCCGAACCGACAAGACGATGTTTTTTTGGGGTCCCAGTCGGATGAGGTACCCGACGTCAGCTGCGTC
Marker45442	CCTAGTACAAAGTTGGATATACGGTGCACAGTTACTGGCAGTTGACAGATTTATTTGGTGCAAAGGGAATAATGGTTGACAGATTTTA
Marker45545	AAAAGTCCAAAGGAAAAAACAAAACAGGAGCAAACACGGACCTGTACAAAACTTATAGGTAGGACCAGGTGCCATAGAGGAGGGAGCA
Marker45607	TCTAAACTAATCTATCAAGCTGTTAGAGCATGGACCGCCGTACTTGGGCCCAGGGTGTGTTACGGTGCAATCTTTGTGAGACCCCGGG
Marker45911	CATTCACAAGGTCCATAAGAACTCTATCCTTCACATCCCCGTTTTTTGTAGTGTCCACAGATGCATGCGGGGAGTTTAGGGGTTTCCT
Marker46011	AAAGATCTTGAAACTATCAACTGATTTCACATATAAAGTAAATCATCAAGAATTGTTTCATCCTAAGGGAGACTACCAGTCTTACCAG
Marker46451	GGGTGTCATAAATAATTTAAAATACATATCATTAAAATAACTTTCAGACTATTATAAAGGTAATTTGTTATTACAGTTTGGTCGAGCT
Marker46483	GGCTGCTCTGCCTGAGCAAATCAAAGAGTGAATTAAATGATCTATTTCCTCAATCACAGATTTTAATTTGAAATATGTACAAACAATA
Marker46532	TGGGTCCGGTGGAGAGTAAGCGGGTCAGCTCCGCCAGCTCCTTGGAAGGGGAGACCACTCCAGACGAAAAAAGAGGTATTCATCATTT
Marker46833	ATTATGTTTGAATAGAGAAGGTCCAATCCTATGCTAAATATTTTTTTATCCTATCATTACAGCCTGCCAAAGAGAAGGACATTGTTAT
Marker47016	CTCCTTCCTCGGTCGTTTCGGCGCTGTCCACTACAACCTCCAGAGGTGCGCCGACTGGGGTGATCGGCTCCCAGCCCGGGACCATCCA
Marker47080	AAATGATGTCATTCATAAAAAATATCAGACACTTAATCACTTTATATGACAGCCTCCAAGTCATTCACAGATTTGCTGACCTTGTGTC
Marker47100	ATTACAACTTTTTTTGGAAGTTTTGAAATCCAATTGAATAAAAATCCAACAACCACCCACAATAACTATCCACCCGAACATTATTACC
Marker47217	ATAACCATGCATTAGTTTTACTCAAATTATATTTGGGAGTAGAAAAGAAGATTTTTTAAGATTTGATATATTTTTACTATATGGCCAT
Marker48052	ATAGGACAGAAATATCCGCATTTAAAAGTCGTTAAGCAACTACTGATGCACATCTGTCAGAAGTTCTGGGAGAATGGCATCTAACGAG
Marker48114	AGGTAACCCTTGTACATGTGATCGGTCAGTGGTACCCAGCCTAATCGCCCGGTTATTGATTATATACTTAATACATACATGTTCAATG
Marker48187	CGAAAGGGTTGTTGGGCCGCGGGTCGATCCGGATGCTCGTTCTCGTTATGTCTATGTGCCGCCGACAGGATATCCTCACTTTCCTGCT
Marker48257	GGATGTCGCAATTGTTCAAGTACATATCATTCTAACATTATGCATGCATTTATATCACTAGTTTAACCAATGAGCATGATCGAGATTT
Marker48377	GGTGGGCTCCGGGGCCGGCCGGCCACCAGGCTGTATCATACACACCTCTGTCATGATCAGTTACGGAAAAGGTGTACAGCAAAGTATC
Marker48637	ATTTTAACTACCGTATTTTTCGGGGCATAGGCCAGTATTTTTTTTCTCTGATGAGCGAGCCCCGGCCTATCCCCCGGGATCGGCTAAT
Marker48731	GGCTGCTCTGCCTGAGCAAATCAAAGAGTGAATTAAATGATCTATTTCCTCAATCACAGATTTTAATTTGAAATATGTACAAACAATA
Marker48911	TCCGTGCAAGCGCAATTGACATATCACTGCGTCTAAAATGTGATTAACTGCGTTCCTCGAGCGCGCCAACGGAACTCTCGTGGCGCTG
Marker49056	CAAGTGGAAAACAATGTGTCAGTTAACCACTGAGTTTACAAAGTGCAGCGATCGCAGCTTCCTCCATGATGGAGAAGCGCCGCAAGCC
Marker49357	TCCCACAAGCAAGAGACAGCCAGAAGAGCATATTCTGTTGTCATGGCAATAGAGAAAAACTTTCATACCTTTTCACCATTATGATATT
Marker49385	CTCCTTCCTCGGTCGTTTCGGCGCTGTCCACTACAACCTCCAGAGGTGCGCCAACTGGGGTGATCGGCTCCCAGCCCGGGACCATCCA
Marker49543	TTACTACCTTGTTCTGGGTAACTATAGATGCATACATATAAAGACACGTGCACTTGGTGCAGCGGCGCCTTGTTCTGCTAGCGAGGAT
Marker49639	CTCCTTCCTCGGTCGTTTCGGCGCTGTCCACTACAACCTCCAGAGGTGCGCCAACTGGGGTGATCGGCTCCCAGCCCGGGACCATCCA
Marker49791	AACTTGTCAGTGTAATGATCAGTCATGATTTTGTGAAAGTTAAATAGTTCTGATAGACAAGCAATCATAGTTCCCTTACCGTTTCCTC
Marker49874	ATTATGACATCATAGCTGATTTAAAAAAAAACAAAACAAAAAAAACCACTGAACTTTTAACTATTTTACAACAATTGATAAACAAGTT
Marker49930	TTGATATCTTTAATTGATTGTGAGTGGTAAAGTATTGATTGCGATAATGGTCACTAATTACCGAACGGTTTCCAGTCGCACCACTTAG
Marker50812	CTCCTTCCTCGGTCGTTTCGGCGCTGTCCACTACAACCTCCAGAGGTGCGCCAACTGGGGTGATCGGCTCCCAGCCCGGGACCATCCA
Marker50890	GTCTCTATAAGGAGTACGGGGTGCTGGGCTACACCATCGTACAGTGTATGGGGGACGCCGTATTCATCCCCGCGGGGGCGCCCCACCA
Marker51420	GATAAATACAAAAAACTCAATTAAAAGACTTGAACAATTTGGTGCGATTTTAGTTTTGATGGTAAGAACTTTCCAGAACCACAGGTGC
Marker51726	AATTTTAATGTATATATCGATTGATGTTTTATTAATGACAAAATACAAATAGCAATACAAATACATGTATACTGTATTATCAAGCCAA
Marker51781	CGGGGGAGGGGATCGTTAAGACCGCCATAGAGCTAGACGCAGACATGATTATCATGGGCAGCCGGGGTCTAGGAACGATCCGTAGAAC
Marker51923	AAGGCGAAACGAAACTGCTTGCAAGTTTAGAAGGGCGAACATTACAAGAAGCGAAAATAGCCCTATATACTGTGATACAGTATCAAAA
Marker52140	AAAACTTTTCATATCAAAAGAGAATGTAAACTACTAAGTATGTAAGTCTTGGTTAGTTTTGCCACATTTGATTAAGCGGGATGTTTTT
Marker52333	TGATTTCAAAGATTGATGACATAGAGAGCACACACTAACACTGTCAGGTTCACAGGGAGAAAGACAGGGATGAGTTACCTCCTCTTNN
Marker53000	ACACTTTTGATAATCAAAAATGATTTGCTTTGTCACATATTTAGCAACCACCGACGTTCAAATGTGTCCATGCCCATGCGAACTTGAA
Marker53261	CGCGCCTCTGCAATATCACAAACACTGACCAGACCGAAACTTCAACTGACCAGACGCACGGAAGCATGACTTGTATATTAGTGGACAC
Marker54360	CACATGTCCATTTATAGAACACCCTGATATTCGCATGATTTATAAATCCAATATAATATACTTCTAATCCCAAAGGGTCATCATGTTG
Marker54444	TTCAAACCAACAATTTTTTCTCAAATGTTGAAGTTATTCAAATATTCTAATGCAGAAACTTACATGTGAGGAGCCCGTTGATGGCCTG
Marker55177	ATTTATACCTACTCCATATCACAACTCAGTTCTGGTTGAACTTATGCAAACGCATGCAGCTCACGATTTTTGTGTCATTGGCGCCCGA
Marker56257	GGCTGCTCTGCCTGAGCAAATCAAAGAGTGAATTAAATGATCTATTTCCTCAATCACAGATTTTAATTTGAAATATGTACAAACAATA
Marker56360	CATGATCTGATTTTTCAAGTAGAAATGAAAATAGAAAATGAAATTAGTGGTTACCTGTGGGATGTACATTCTCCTCTCCTGTACGACA
Marker56623	AATATGAAAGACATTCCTATCACTACTGTTAGGGGAAAACCCTGAAGAAAACCCGCGGGACACTGAGAAAACCCTAAGTGACACTTAG
Marker56892	GAAAATGATTTATAACGATAACAATATAAATGGTCGTATCTTCTTGAAGTTGACGGTGGATGGTCTCCCTGGTCCGCATGGGGCAAAT
Marker57048	AACTGTGATATTCTCTATTGTAGACTTCCTCCAACAATGTACAGGACATCATAGAGAGCCGTGTGGAGAAGAGAACCAAGGGCGTGTA
Marker57113	TTTCAACCTGTGATCTAAGGAAAAGTCCCACTCACTGATTTTCTGCCATGAGCTTTGGAGGTTGGGAATACCGTCTGCTAGGCACTCC
Marker57406	CTCCGATGTTTGAGAAAGTGGTCACCAGATGAAACAAAAGTTGTGGAACGTTGTCCGGTGTGACGTAAGCCCACACACCAAATATGGC
Marker57888	CACTGTACCCCACTGTACGCCACTGTACAGGGCACTGACCAGCACTGTACCCCACTGTACGCCACTGTACCGGGCACTGACCATCACT
Marker57989	AAGGAAGTATAAATTAGGAAATCAAAAATTGTCATTAATTGCGTTTGTACGTCAACCCATATACGGGAAGGGGGTGGGGGTGGGAGGT
Marker58117	AAAATATTTTATAGCTATTGGCCGAAAAATGACACAATCAGGACACAATCAGGATAATGAAATATTGTTTGATAAAAGTGTATCATAT
Marker58458	CACTGTACCCCACTGTACGCCACTGTACAGGGCACTGACCAGCACTGTACCCCACTGTACGCCACTGTACCGGGCACTGACCATCACT
Marker58467	ACGTAACTCTCTTCGGCTATTTCCGAAGACAAAACTTGAACGTTTTACGTCAGAAATATGACGTCATAATGTAGACTGAGCACGCGAC
Marker59095	CTCTGCCTGTATTCAGACTTACTTTGTCCCGCTGAGTTGAGCTCTCTGGCAGGAACACGCTGAGTGAGTAGTCATACTTGCAGTGTCG
Marker59332	CTAAATGTATCTTGCTTGCATCGTGTGCATGTACCGATATGTCCTGTCTGTGGACAGTAACCAAGGTGTTTAGTTTTTATTGGATCTC
Marker59547	GCCGCAGTACCTACATATAACATTATATAACATTGTACCTATAACACAATGGAGGGTATCTTATGAAAAGTGAGCTAGATAGAGATAG
Marker59635	TTCGGGTGTTTGGAGACAGCACCAGAGGGAAAAATCCGGTCCATGTAGATATCCGCCATCATGAAAACATCCCAGTTTTTAAGTGGTT
Marker59792	AAAATATTCATGTTTTTACCCAATATCGATGACACAGAATATTCATGTTTTTACCTGAGATTGATGACACAGAATATTCATGTTTTTA
Marker60015	GATGGGATTTCACCACCATGCTTGAAGATCTCGACTTCGCAGACGACATTGCTCTGCTGTCATCTACTATGAACTATCTCCAGTTCAA
Marker60171	ACTCTGTTGTGACCATGTATAAAGCGGGCAAGAACTGTAACAAAAATCTATGCTCGGTGTCTATTTTAACAGACAAGGTCGAAAAAAG
Marker60196	ATCAGACATCAGTTTGTGCTGTAACTCTTCTGTTAAACAACTGCCAGTTTATCTCCCTTGTTAAAAGTGACCAATAAAATGCAGAGAG
Marker60445	TATATTTAATCCTCTCGAACTCGGTCCATTTTGTTCAAACGACGAACACTGTCACGGAGTACAGAAATGTTGCCGGGTCCTATTAAAC
Marker60961	ATTTTTTATTATCATTTTCTATTGGCAAAAAACAATGGGATATTAAAATCAAAAAGTAACAGAATGTCAAAATCAGAAAGATATAAAT
Marker60962	CAGGTTTTGCTGGAGGTCATCCCCACAACGAGACAGGCTCAGGCGCGAGTTTCCTCTGTTTGCCGGACGATCCACTATGGGGTGCACA
Marker61107	AACAGAACAGAGAAGAATACATAAACAGAACAAAACAGAATGAATAGAGCAAAAAATGGACCCATTGGTGGCATAACATTTCAAAGTN
Marker61140	ATTTTTATTTAAAAACACGCTGTAGTTCAAAAGAGACTAAAGTTGATGTTTATCTGTATGTTGCTTTTTGTTTCAATTTGCGATGACT
Marker61167	CTTTGATAGGTCCTGTAATATTACCAAATGCTACTTTTTACATAGTCACCCACGTCCAGTTTGATAATTACTACATCGCTTGCTATTG
Marker61260	TTCGTGCTTTCGCCTTTTTAGCTCACCGTGACGAAGTCATTGGGAGCATATGCTATGCCCCCGGCGTCGGCGTCTGGAGCTGGTTAAA
Marker61311	GAATGCAGAATGTGTTTGGAAATAGGTAAAGGCACTGTCATATCAGGTCGCGTTCCCACAAACGTTCTCACAGCGTTGTGAAATTTCT
Marker61523	CCCTAAATCAATGTATGCACGTATTTACTATAGGGACCAATATGCCTCCAGGGGGAGGAGATGATATAAACCTGTTGGAAATCCCCAG
Marker61776	CTGTTCAAGATGACAAAACCGGAACTGATGAATGAAATCGACGCAGCCTCTCTGATCCCGATCTTATTGGCCAAAGGTTACATCAAGG
Marker61915	AATCTTTAATTCCAAATCATGTTCACAGCTGTTTACGGCAAAGCCGTCCGAGCGCACGGAAATCACGGACATAACCAGGGCTTCGTGA
Marker62377	ACTATGCTCTATTTTACAGACTTTAACTGTGGTCTATTTAACAGGCGTTCATTGTGTTGTGCTCTATTTTTTACAGCCGATCACTGCT
Marker62557	CCCCAAAGACAACTGATGCCCCCTGTAACTTACACCCGAGGTTTTTCGGTCCTCTCGACCGCCGGAGCCAGTTGCTGTGTGTGAACCT
Marker62692	AGGTATGTGACAATTCTCATTTTGTAGTAAAAATATTAGTTTTTAAAATAAATGATGGAATGAGGGAATATTTTAAAGAATATAGCAA
Marker62817	ATATTGATATAAGTATGTTATACAATTTTGTATCAAGTCTGAAGTACTGTGTCAGCAAATTTAAAAATTAGCTTTCTACTAAATAAAT
Marker63076	ACTCCAAACGGAGAGATACTGCGGGATACATCGGGGATCTTCAAGGTGTCATGTGAGTGTGACATCACGTACTACCCTCTGGACAAGC
Marker63480	TGTGAGGAAACTGTATCGCACAGTCAATAATTTTACAACATTAACATTTATCATCACTTTTCTCTTTGGCGCTTTCATCTGACGGCTG
Marker64389	CGTCCTTGCACGGGAATGGGCGTGCGGGGAACGTCCACCAGCTTGCCGTTGATCCTAAACCACGTTGGGCGCCATTTTTGTAACCGTT
Marker64524	ATTTTGGTACATGTTAATGCATTTAATTTGTGATAATTTTAAATCTGCGTTTTTTGGGGTGGTTTTTACATTTCACATTACATGCAGT
Marker64630	GGCTGCTCTGCCTGAGCAAATCAAAGAGTGAATTAAATGATCTATTTCCTCAATCACAGATTTTAATTTGAAATATGTACAAACAATA
Marker64836	CATCTACGTCCATTGATAGGTCTTGGAATATTAGCAAATTCTACTTTTTACATAGTCATCTACATCCAGTTTGATAATTACCGGTATT
