# Supplementary material for: A High-Density SNP Genetic Linkage Map and QTL Analysis of Growth-Related Traits in a Hybrid Family of Oysters (Crassostrea gigas × Crassostrea angulata) Using Genotyping-by-Sequencing
Source: G3 (Bethesda). 2016 Mar 17;6(5):1417–26. doi: 10.1534/g3.116.026971 (PMC4856092; doi:10.1534/g3.116.026971)
Supplement: Supplemental Material [file supp_g3.116.026971_TableS7.xlsx]

## Sheet: Sheet1
Table S7. Markers and their positions on the 10 linkage groups of the sex-average map constructed using a hybridized family of Crassostrea gigas and C. angulata.
Marker name	Linkgae group	Genetic position
Marker25095	A1	0
Marker40833	A1	1.23
Marker29791	A1	6.723
Marker29802	A1	10.68
Marker11710	A1	12.435
Marker22501	A1	12.809
Marker13557	A1	13.356
Marker33266	A1	14.375
Marker7253	A1	15.371
Marker17665	A1	16.365
Marker7231	A1	17.218
Marker13839	A1	17.462
Marker5715	A1	18.647
Marker22504	A1	19.279
Marker33852	A1	19.786
Marker10830	A1	20.729
Marker9591	A1	21.646
Marker5731	A1	22.195
Marker7222	A1	22.853
Marker40834	A1	23.563
Marker10430	A1	24.202
Marker18603	A1	24.705
Marker33280	A1	25.415
Marker16945	A1	25.656
Marker907	A1	26.707
Marker41507	A1	27.763
Marker18608	A1	28.006
Marker41508	A1	28.633
Marker19157	A1	29.75
Marker30635	A1	30.589
Marker49056	A1	30.589
Marker27209	A1	33.796
Marker11231	A1	35.46
Marker34911	A1	36.318
Marker34909	A1	38.257
Marker33942	A1	38.389
Marker23174	A1	38.824
Marker36408	A1	39.425
Marker11324	A1	40.319
Marker30525	A1	40.7
Marker33560	A1	41.135
Marker30071	A1	41.436
Marker13357	A1	42.803
Marker1589	A1	43.267
Marker34616	A1	43.862
Marker34614	A1	44.345
Marker30552	A1	44.453
Marker33148	A1	45.238
Marker36394	A1	45.322
Marker17544	A1	46.505
Marker32491	A1	46.763
Marker6155	A1	46.982
Marker28342	A1	47.28
Marker37192	A1	48
Marker19337	A1	48.347
Marker30513	A1	48.704
Marker48187	A1	49.042
Marker30558	A1	49.236
Marker30594	A1	49.419
Marker16328	A1	49.719
Marker16336	A1	50.073
Marker61915	A1	50.282
Marker22170	A1	50.401
Marker6186	A1	50.521
Marker31690	A1	50.521
Marker36395	A1	50.873
Marker6161	A1	51.254
Marker34613	A1	51.543
Marker33142	A1	51.889
Marker33141	A1	51.889
Marker3864	A1	52.178
Marker32514	A1	53.391
Marker18547	A1	53.662
Marker30522	A1	54.365
Marker41540	A1	55.622
Marker9096	A1	57.347
Marker35312	A1	58.522
Marker41535	A1	58.909
Marker11594	A1	59.502
Marker6223	A1	59.784
Marker3721	A1	60.71
Marker32188	A1	60.71
Marker35322	A1	61.537
Marker17766	A1	61.671
Marker29570	A1	61.777
Marker28690	A1	62.087
Marker6736	A1	62.624
Marker18957	A1	62.642
Marker3990	A1	63.228
Marker15291	A1	64.413
Marker41538	A1	64.507
Marker18692	A1	64.777
Marker9859	A1	65.181
Marker9838	A1	65.741
Marker50812	A1	67.506
Marker47016	A1	67.506
Marker49385	A1	67.506
Marker49639	A1	67.506
Marker392	A1	70.055
Marker10740	A1	71.255
Marker43898	A1	71.924
Marker6154	A1	72.446
Marker10651	A1	73.477
Marker6978	A1	73.61
Marker6311	A1	75.591
Marker24448	A1	77.031
Marker34627	A1	80.25
Marker34416	A1	81.075
Marker40341	A1	81.491
Marker33151	A1	82.12
Marker37727	A1	83.656
Marker19149	A1	83.83
Marker51726	A1	85.034
Marker6092	A1	87.43
Marker16345	A1	88
Marker16514	A1	88.842
Marker61107	A1	89.02
Marker43063	A1	89.301
Marker17650	A1	90.157
Marker33764	A1	90.184
Marker3093	A1	90.184
Marker31656	A1	90.377
Marker42339	A1	90.587
Marker32250	A1	90.885
Marker3700	A1	91.172
Marker10155	A1	91.524
Marker39292	A1	92.148
Marker36008	A1	92.836
Marker19146	A1	94.135
Marker35944	A1	94.84
Marker25342	A1	95.677
Marker3346	A1	96
Marker34151	A1	96.751
Marker35050	A1	96.983
Marker15846	A1	96.983
Marker40453	A1	97.241
Marker40419	A1	97.505
Marker33655	A1	97.852
Marker43306	A1	98.269
Marker43167	A1	98.907
Marker16513	A1	99.443
Marker12971	A1	99.746
Marker8240	A1	100.055
Marker7198	A1	100.279
Marker18698	A1	100.589
Marker27661	A1	100.589
Marker38843	A1	101.1
Marker3743	A1	101.174
Marker18955	A1	101.174
Marker28684	A1	101.453
Marker15280	A1	101.986
Marker40454	A1	102.386
Marker9269	A1	102.603
Marker4913	A1	102.778
Marker4914	A1	103.05
Marker40482	A1	103.934
Marker20930	A1	104.05
Marker35022	A1	104.67
Marker763	A1	104.833
Marker37247	A1	105.403
Marker21346	A1	105.998
Marker35021	A1	106.077
Marker149	A1	106.204
Marker8710	A1	106.304
Marker35402	A1	106.791
Marker206	A1	107.457
Marker31652	A1	107.869
Marker20608	A1	108.679
Marker15843	A1	109.255
Marker32772	A1	109.943
Marker3676	A1	110.454
Marker43165	A1	112.466
Marker7194	A1	114.54
Marker36916	A1	117.083
Marker18715	A1	120.214
Marker18690	A1	124.632
Marker18691	A1	124.632
Marker40408	A1	134.277
Marker5262	A2	0
Marker36158	A2	4.601
Marker37624	A2	5.711
Marker38145	A2	6.45
Marker38224	A2	6.958
Marker33650	A2	7.309
Marker5503	A2	8.127
Marker7872	A2	8.275
Marker13295	A2	8.832
Marker38599	A2	9.041
Marker6507	A2	9.545
Marker5332	A2	9.772
Marker3068	A2	10.026
Marker31589	A2	10.674
Marker41598	A2	10.9
Marker41597	A2	10.9
Marker11165	A2	10.9
Marker5354	A2	10.986
Marker48114	A2	11.174
Marker14500	A2	11.416
Marker36767	A2	11.732
Marker5327	A2	11.759
Marker26521	A2	11.759
Marker42038	A2	12.14
Marker37620	A2	12.14
Marker7867	A2	12.615
Marker5299	A2	13.436
Marker5208	A2	13.981
Marker5268	A2	14.679
Marker59547	A2	14.682
Marker7868	A2	15.512
Marker29142	A2	16.877
Marker31583	A2	16.877
Marker32880	A2	17.258
Marker38242	A2	18.983
Marker38149	A2	19.468
Marker38144	A2	22.372
Marker6500	A2	23.417
Marker31636	A2	24.58
Marker3893	A2	24.652
Marker17120	A2	24.652
Marker16014	A2	26.725
Marker42039	A2	29.635
Marker36609	A2	29.749
Marker11749	A2	30.995
Marker28910	A2	31.187
Marker7745	A2	31.74
Marker19377	A2	32.964
Marker5811	A2	33.62
Marker36613	A2	34.022
Marker29859	A2	34.114
Marker33710	A2	34.417
Marker16569	A2	36.481
Marker7799	A2	36.813
Marker37230	A2	37.642
Marker16573	A2	38.037
Marker27912	A2	38.308
Marker40306	A2	38.362
Marker36858	A2	39.185
Marker30164	A2	39.412
Marker7837	A2	39.412
Marker1952	A2	39.596
Marker12108	A2	39.722
Marker64836	A2	39.966
Marker39805	A2	40.006
Marker17028	A2	40.006
Marker14253	A2	40.542
Marker17394	A2	40.724
Marker54360	A2	40.952
Marker3036	A2	41.054
Marker3125	A2	41.19
Marker20439	A2	41.222
Marker37228	A2	41.393
Marker30163	A2	41.929
Marker8171	A2	42.145
Marker24794	A2	42.145
Marker19321	A2	42.616
Marker6616	A2	43.175
Marker1809	A2	43.175
Marker36866	A2	43.794
Marker1847	A2	44.497
Marker2395	A2	45.169
Marker14053	A2	45.599
Marker17986	A2	46.426
Marker3134	A2	46.636
Marker11961	A2	46.87
Marker19835	A2	47.511
Marker60015	A2	47.931
Marker631	A2	48.013
Marker38444	A2	48.663
Marker3129	A2	48.908
Marker15749	A2	49.079
Marker28330	A2	49.197
Marker36880	A2	49.786
Marker15743	A2	50.832
Marker15742	A2	50.898
Marker32990	A2	51.745
Marker32998	A2	52.941
Marker30336	A2	53.415
Marker30339	A2	53.771
Marker4739	A2	54.504
Marker25535	A2	55.819
Marker41142	A2	55.886
Marker15781	A2	55.889
Marker27538	A2	56.171
Marker32411	A2	56.541
Marker257	A2	56.918
Marker7923	A2	57.013
Marker5248	A2	57.934
Marker2822	A2	58.333
Marker24402	A2	59.258
Marker24395	A2	59.48
Marker24327	A2	59.779
Marker43433	A2	59.854
Marker24324	A2	59.934
Marker17069	A2	60.312
Marker43432	A2	60.385
Marker2722	A2	60.69
Marker211	A2	61.015
Marker35276	A2	61.371
Marker40966	A2	61.597
Marker9069	A2	61.992
Marker7900	A2	62.236
Marker17862	A2	62.4
Marker15217	A2	62.4
Marker35070	A2	62.714
Marker25511	A2	62.823
Marker40205	A2	62.823
Marker25537	A2	62.99
Marker15339	A2	63.194
Marker25516	A2	63.194
Marker63480	A2	63.303
Marker43104	A2	63.501
Marker42741	A2	63.59
Marker30805	A2	63.697
Marker11974	A2	63.758
Marker15321	A2	63.866
Marker58467	A2	64.016
Marker60961	A2	64.22
Marker15238	A2	64.22
Marker2358	A2	64.621
Marker39117	A2	64.621
Marker36512	A2	64.621
Marker41356	A2	64.859
Marker7922	A2	65.077
Marker15317	A2	65.573
Marker38846	A2	65.595
Marker31479	A2	65.757
Marker18024	A2	65.908
Marker38427	A2	66.059
Marker60962	A2	66.264
Marker40846	A2	66.416
Marker40157	A2	66.514
Marker14956	A2	66.743
Marker30342	A2	66.787
Marker34254	A2	67.099
Marker2377	A2	67.246
Marker2378	A2	67.517
Marker11964	A2	67.871
Marker36888	A2	68.398
Marker32327	A2	68.64
Marker19501	A2	68.64
Marker43049	A2	69.114
Marker30691	A2	69.423
Marker33001	A2	69.565
Marker14251	A2	69.94
Marker5203	A2	70.019
Marker11963	A2	70.237
Marker7940	A2	70.62
Marker35764	A2	70.767
Marker5831	A2	70.856
Marker43962	A2	71.353
Marker3043	A2	71.641
Marker33812	A2	72.453
Marker36882	A2	73.196
Marker14084	A2	74.295
Marker40545	A2	74.958
Marker21383	A2	75.584
Marker2650	A2	75.66
Marker18003	A2	76.025
Marker17987	A2	76.531
Marker14080	A2	76.852
Marker35060	A2	76.852
Marker7914	A2	76.982
Marker30348	A2	79.198
Marker15747	A2	79.36
Marker26269	A2	96.48
Marker15219	A2	100.366
Marker2355	A2	102.496
Marker14835	A3	0
Marker10277	A3	5.751
Marker8581	A3	8.004
Marker16564	A3	9.834
Marker61776	A3	9.834
Marker33165	A3	9.834
Marker50890	A3	11.316
Marker8584	A3	12.183
Marker10279	A3	12.908
Marker10281	A3	15.026
Marker14834	A3	16.153
Marker14031	A3	18.144
Marker37718	A3	18.144
Marker37723	A3	18.382
Marker7412	A3	22.851
Marker31236	A3	24.189
Marker41207	A3	25.635
Marker40646	A3	26.566
Marker40656	A3	26.658
Marker10278	A3	27.561
Marker27580	A3	28.044
Marker10287	A3	28.886
Marker31249	A3	29.558
Marker12404	A3	29.652
Marker39491	A3	29.886
Marker16231	A3	30.533
Marker26138	A3	31.437
Marker26137	A3	31.437
Marker37713	A3	32.37
Marker2748	A3	32.995
Marker29667	A3	33.28
Marker39709	A3	33.323
Marker27923	A3	33.643
Marker40632	A3	33.769
Marker25226	A3	34.008
Marker12405	A3	34.292
Marker28060	A3	34.628
Marker40613	A3	34.628
Marker32747	A3	34.663
Marker1452	A3	34.713
Marker33172	A3	34.951
Marker16559	A3	35.377
Marker8580	A3	35.815
Marker10276	A3	36.021
Marker40955	A3	36.874
Marker44181	A3	37.917
Marker62817	A3	39.014
Marker27301	A3	39.463
Marker38301	A3	39.957
Marker11928	A3	40.49
Marker42973	A3	40.765
Marker36747	A3	41.045
Marker11758	A3	41.045
Marker11988	A3	41.541
Marker27930	A3	41.68
Marker37007	A3	41.715
Marker36748	A3	42.301
Marker11996	A3	42.695
Marker27709	A3	42.959
Marker43902	A3	43.071
Marker23745	A3	43.292
Marker10780	A3	44.221
Marker11756	A3	44.454
Marker9853	A3	44.475
Marker22731	A3	44.831
Marker36983	A3	45.032
Marker22718	A3	45.726
Marker21304	A3	45.767
Marker44185	A3	46.136
Marker57406	A3	46.357
Marker55177	A3	46.725
Marker10783	A3	47.414
Marker30290	A3	47.88
Marker18274	A3	48.38
Marker38022	A3	48.51
Marker19926	A3	48.824
Marker18776	A3	49.07
Marker44323	A3	49.562
Marker28211	A3	49.686
Marker25939	A3	50.189
Marker23405	A3	50.248
Marker19262	A3	50.34
Marker244	A3	50.589
Marker19991	A3	51.317
Marker38548	A3	52.187
Marker29321	A3	52.411
Marker23774	A3	52.864
Marker34358	A3	53.043
Marker36878	A3	53.766
Marker37169	A3	54.568
Marker18706	A3	56.301
Marker24364	A3	57.115
Marker36081	A3	57.928
Marker3682	A3	58.296
Marker37157	A3	58.831
Marker19697	A3	58.831
Marker28828	A3	59.673
Marker12828	A3	60.139
Marker29505	A3	60.189
Marker48637	A3	60.465
Marker37343	A3	60.465
Marker25959	A3	60.969
Marker21815	A3	61.159
Marker53000	A3	61.159
Marker24565	A3	61.611
Marker11127	A3	61.611
Marker43137	A3	62.396
Marker4296	A3	62.396
Marker54444	A3	62.396
Marker56892	A3	62.396
Marker34360	A3	63.14
Marker20078	A3	63.14
Marker21496	A3	63.14
Marker16429	A3	64.711
Marker8423	A3	65.963
Marker34973	A3	66.861
Marker34975	A3	68.966
Marker44493	A3	69.226
Marker7956	A3	70.319
Marker38453	A3	73.255
Marker57048	A3	74.054
Marker8425	A3	74.658
Marker27434	A3	75.749
Marker11659	A3	78.954
Marker23126	A3	80.305
Marker32139	A3	81.189
Marker32132	A3	81.189
Marker23127	A3	83.436
Marker31461	A3	85.021
Marker35320	A3	86.676
Marker18616	A3	88.046
Marker36094	A3	88.615
Marker27249	A3	89.416
Marker1135	A3	90.599
Marker17242	A3	91.379
Marker38456	A3	92.073
Marker35695	A3	92.778
Marker35709	A3	93.599
Marker35155	A3	93.599
Marker16994	A3	94.673
Marker14634	A3	94.673
Marker39281	A3	96.208
Marker43093	A3	96.611
Marker40984	A3	97.829
Marker33687	A3	98.634
Marker2067	A3	99.832
Marker8595	A3	100.077
Marker34735	A3	102.685
Marker35321	A3	104.03
Marker3057	A3	104.949
Marker37197	A3	104.949
Marker21395	A3	111.014
Marker24984	A4	0
Marker9551	A4	2.685
Marker27774	A4	5.879
Marker42121	A4	7.854
Marker8010	A4	8.259
Marker5446	A4	9.565
Marker28436	A4	10.306
Marker122	A4	10.92
Marker36818	A4	11.612
Marker16538	A4	11.993
Marker39644	A4	12.875
Marker37028	A4	13.444
Marker44073	A4	14.233
Marker6381	A4	14.566
Marker12663	A4	15
Marker10369	A4	15
Marker17777	A4	15.948
Marker38681	A4	17.419
Marker16544	A4	19.655
Marker39510	A4	19.961
Marker19510	A4	20.294
Marker27771	A4	20.48
Marker27571	A4	20.734
Marker27772	A4	21.57
Marker27569	A4	21.732
Marker27775	A4	22.179
Marker36228	A4	22.612
Marker42276	A4	23.395
Marker44541	A4	23.551
Marker20450	A4	24.851
Marker20355	A4	25.973
Marker22055	A4	26.325
Marker10372	A4	26.48
Marker1406	A4	27.278
Marker28437	A4	28.085
Marker24743	A4	28.681
Marker7390	A4	30.215
Marker21026	A4	30.215
Marker20680	A4	30.215
Marker21148	A4	30.481
Marker19013	A4	33.905
Marker42674	A4	34.091
Marker24725	A4	35.521
Marker27206	A4	35.521
Marker38803	A4	36.151
Marker57113	A4	36.58
Marker30390	A4	36.957
Marker44578	A4	36.978
Marker24806	A4	37.331
Marker30400	A4	37.419
Marker14405	A4	37.51
Marker32163	A4	38.027
Marker32145	A4	38.07
Marker40670	A4	38.553
Marker32152	A4	39.021
Marker30398	A4	39.295
Marker44570	A4	40.812
Marker46833	A4	42.238
Marker42183	A4	42.908
Marker44905	A4	43.725
Marker13458	A4	43.725
Marker58458	A4	43.725
Marker30968	A4	44.791
Marker33801	A4	44.791
Marker40662	A4	44.791
Marker13812	A4	44.791
Marker10696	A4	44.94
Marker3171	A4	46.621
Marker40668	A4	46.845
Marker27184	A4	46.845
Marker19241	A4	47.742
Marker15614	A4	48.423
Marker40667	A4	49.049
Marker424	A4	51.772
Marker27197	A4	53.387
Marker27195	A4	54.159
Marker30099	A4	54.41
Marker17713	A4	56.234
Marker19873	A4	59.832
Marker43705	A4	62.135
Marker24759	A4	62.166
Marker41823	A4	63.636
Marker35392	A4	64.92
Marker40382	A4	66.045
Marker35372	A4	67.759
Marker1504	A4	68.122
Marker5097	A4	70.393
Marker7058	A4	70.981
Marker44543	A4	72.193
Marker7053	A4	72.612
Marker8292	A4	73.482
Marker43714	A4	74.412
Marker26009	A4	74.566
Marker43697	A4	75.353
Marker22007	A4	76.115
Marker25564	A4	76.362
Marker21780	A4	76.828
Marker17205	A4	76.971
Marker19021	A4	77.406
Marker5101	A4	77.435
Marker19744	A4	77.904
Marker43692	A4	78.599
Marker35852	A4	79.147
Marker5100	A4	80.33
Marker25158	A4	80.648
Marker30102	A4	81.469
Marker8291	A4	81.772
Marker43715	A4	82.402
Marker13371	A4	82.663
Marker42014	A4	83.231
Marker18159	A4	84.894
Marker19019	A4	84.894
Marker43254	A4	87.109
Marker25017	A4	88.277
Marker32277	A4	91.767
Marker22003	A4	98.806
Marker5555	A4	106.383
Marker13383	A4	114.704
Marker41244	A5	0
Marker18525	A5	1.67
Marker33767	A5	4.278
Marker43980	A5	7.305
Marker18836	A5	12.968
Marker21429	A5	14.618
Marker37065	A5	14.706
Marker13729	A5	15.875
Marker22957	A5	16.859
Marker13904	A5	17.928
Marker33045	A5	18.04
Marker29089	A5	20.138
Marker24662	A5	20.817
Marker1820	A5	22.289
Marker39423	A5	23.365
Marker9558	A5	24.507
Marker9607	A5	25.448
Marker29813	A5	26.354
Marker44601	A5	27.04
Marker36642	A5	28.116
Marker36045	A5	28.747
Marker34961	A5	29.134
Marker41873	A5	29.134
Marker18914	A5	29.228
Marker43975	A5	29.452
Marker39609	A5	29.555
Marker19208	A5	29.69
Marker4421	A5	30.419
Marker13855	A5	31.306
Marker30371	A5	31.519
Marker12570	A5	32.164
Marker43580	A5	32.428
Marker27852	A5	33.017
Marker21856	A5	33.214
Marker37354	A5	33.993
Marker4435	A5	34.45
Marker14494	A5	35.045
Marker5778	A5	35.045
Marker19206	A5	35.418
Marker17037	A5	35.796
Marker34970	A5	36.392
Marker13851	A5	38.288
Marker36073	A5	39.553
Marker9602	A5	40.175
Marker27867	A5	40.246
Marker15062	A5	41.057
Marker34727	A5	41.665
Marker1645	A5	41.951
Marker60445	A5	42.069
Marker20720	A5	43.21
Marker40711	A5	43.483
Marker29019	A5	46.24
Marker11032	A5	47.907
Marker33854	A5	48.244
Marker19304	A5	50.164
Marker14936	A5	50.164
Marker64389	A5	50.417
Marker51923	A5	51.605
Marker36783	A5	51.681
Marker21673	A5	52.2
Marker36112	A5	52.559
Marker2535	A5	53.244
Marker51420	A5	54.364
Marker12859	A5	54.707
Marker12071	A5	55.224
Marker35732	A5	55.386
Marker22446	A5	55.996
Marker33315	A5	56.909
Marker27336	A5	58.211
Marker12068	A5	58.211
Marker2004	A5	58.762
Marker12045	A5	59.762
Marker12070	A5	60.093
Marker12021	A5	60.526
Marker1169	A5	60.75
Marker37876	A5	61.121
Marker12037	A5	61.281
Marker63076	A5	61.77
Marker5653	A5	62.347
Marker34729	A5	62.886
Marker12970	A5	62.923
Marker14196	A5	63.178
Marker51781	A5	63.668
Marker47080	A5	63.668
Marker13183	A5	63.668
Marker38256	A5	63.668
Marker28885	A5	64.258
Marker22344	A5	64.273
Marker40527	A5	64.273
Marker22329	A5	64.945
Marker25205	A5	65.712
Marker37319	A5	66.47
Marker64524	A5	66.619
Marker41890	A5	67.011
Marker45911	A5	67.803
Marker19345	A5	68.445
Marker46451	A5	68.445
Marker49357	A5	68.723
Marker28887	A5	68.916
Marker34707	A5	69.27
Marker9711	A5	69.608
Marker23499	A5	70.207
Marker38934	A5	70.735
Marker36324	A5	71.853
Marker3102	A5	72.526
Marker3732	A5	73.043
Marker2696	A5	73.458
Marker37322	A5	73.643
Marker17899	A5	74.225
Marker908	A5	74.81
Marker24513	A5	75.628
Marker30014	A5	75.628
Marker30034	A5	75.628
Marker30037	A5	75.901
Marker913	A5	76.068
Marker36314	A5	76.199
Marker36315	A5	76.771
Marker38268	A5	76.798
Marker13022	A5	76.971
Marker19439	A5	77.543
Marker13749	A5	78.216
Marker2687	A5	78.216
Marker14120	A5	78.216
Marker13273	A5	78.447
Marker37257	A5	78.447
Marker14975	A5	79.077
Marker16709	A5	79.077
Marker36325	A5	80.184
Marker21334	A5	80.76
Marker14353	A5	82.696
Marker5143	A5	83.86
Marker14346	A5	84.387
Marker48731	A5	84.62
Marker56257	A5	85.187
Marker46483	A5	85.187
Marker14344	A5	85.725
Marker8164	A5	85.725
Marker19150	A5	85.725
Marker13760	A5	86.17
Marker64630	A5	86.17
Marker25552	A5	87.447
Marker10748	A5	87.693
Marker5144	A5	87.693
Marker10707	A5	88.873
Marker43494	A5	89.527
Marker43500	A5	93.956
Marker10711	A5	97.882
Marker9196	A6	0
Marker23313	A6	0.774
Marker32933	A6	1.098
Marker35598	A6	1.93
Marker26061	A6	2.467
Marker37428	A6	4.333
Marker1385	A6	6.834
Marker25658	A6	8.128
Marker1196	A6	10.084
Marker11028	A6	11.124
Marker17838	A6	13.27
Marker21531	A6	14.991
Marker14237	A6	15.282
Marker25197	A6	18.423
Marker14918	A6	18.423
Marker15925	A6	19.936
Marker8981	A6	20.435
Marker16697	A6	20.699
Marker18317	A6	21.916
Marker9745	A6	22.308
Marker9150	A6	23.51
Marker32887	A6	23.51
Marker9616	A6	24.682
Marker9882	A6	25.065
Marker41086	A6	25.413
Marker9684	A6	26.112
Marker32081	A6	26.512
Marker1229	A6	26.756
Marker9076	A6	27.781
Marker9681	A6	29.458
Marker27517	A6	29.948
Marker42909	A6	30.74
Marker38815	A6	30.763
Marker29978	A6	30.763
Marker43997	A6	31.624
Marker20883	A6	31.624
Marker40277	A6	32.833
Marker2097	A6	33.246
Marker17756	A6	33.246
Marker43353	A6	33.667
Marker17947	A6	34.713
Marker29271	A6	35.285
Marker29969	A6	37.522
Marker29968	A6	37.522
Marker3993	A6	39.528
Marker11105	A6	41.218
Marker29967	A6	42.881
Marker17704	A6	44.588
Marker9174	A6	44.588
Marker9159	A6	45.879
Marker10629	A6	46.336
Marker10627	A6	47.109
Marker37730	A6	47.913
Marker7385	A6	50.419
Marker23905	A6	51.523
Marker30445	A6	52.271
Marker4042	A6	52.443
Marker30443	A6	54.258
Marker2264	A6	54.293
Marker12401	A6	54.293
Marker11	A6	54.293
Marker426	A6	54.293
Marker18837	A6	54.293
Marker48911	A6	54.293
Marker459	A6	54.293
Marker29316	A6	54.293
Marker22077	A6	54.293
Marker9130	A6	54.293
Marker26206	A6	55.727
Marker45607	A6	57.209
Marker49543	A6	57.209
Marker14371	A6	59.612
Marker10790	A6	60.369
Marker48377	A6	61.495
Marker37407	A6	61.495
Marker22794	A6	62.079
Marker16022	A6	62.58
Marker24049	A6	64.138
Marker41767	A6	65.556
Marker37405	A6	67.22
Marker30721	A6	67.22
Marker37390	A6	67.22
Marker58117	A6	69.698
Marker30719	A6	69.837
Marker4826	A6	70.087
Marker25713	A6	72.158
Marker61523	A6	72.158
Marker2124	A6	73.555
Marker4822	A6	74.581
Marker19930	A6	74.681
Marker26545	A6	74.921
Marker24639	A6	79.719
Marker23637	A6	79.724
Marker32365	A6	80.218
Marker36719	A6	80.894
Marker42222	A6	81.865
Marker29397	A6	82.243
Marker41269	A6	83.006
Marker34246	A6	83.192
Marker30961	A6	83.319
Marker23633	A6	83.462
Marker16714	A6	83.744
Marker20668	A6	84.803
Marker41073	A6	84.803
Marker1430	A6	85.134
Marker28123	A6	85.852
Marker36671	A6	86.284
Marker23231	A6	86.284
Marker7064	A6	86.503
Marker25714	A6	86.854
Marker2128	A6	87.145
Marker17344	A6	87.39
Marker12291	A6	87.594
Marker7050	A6	87.852
Marker23627	A6	87.914
Marker2127	A6	87.914
Marker6854	A6	88.077
Marker40384	A6	88.077
Marker23015	A6	88.138
Marker37851	A6	88.318
Marker21289	A6	88.454
Marker16750	A6	88.575
Marker25718	A6	88.635
Marker28476	A6	88.91
Marker13197	A6	88.91
Marker6855	A6	89.411
Marker38885	A6	89.597
Marker37839	A6	90.007
Marker7041	A6	90.334
Marker12293	A6	90.51
Marker7042	A6	91.431
Marker16748	A6	91.912
Marker37859	A6	92.095
Marker30774	A6	92.493
Marker37283	A6	93.121
Marker30775	A6	93.738
Marker7035	A6	94.938
Marker14539	A6	95.364
Marker36658	A6	96.125
Marker12988	A6	97.367
Marker59332	A6	98.878
Marker41222	A6	101.295
Marker41264	A6	102.414
Marker42958	A7	0
Marker11157	A7	0.791
Marker28854	A7	1.391
Marker24091	A7	2.159
Marker37137	A7	2.784
Marker41322	A7	3.786
Marker4809	A7	4.125
Marker39646	A7	4.724
Marker6580	A7	5.17
Marker17384	A7	5.828
Marker8736	A7	6.36
Marker10804	A7	6.472
Marker14928	A7	6.752
Marker33892	A7	6.967
Marker11955	A7	7.348
Marker13605	A7	7.911
Marker33182	A7	8.049
Marker29365	A7	8.363
Marker29544	A7	8.813
Marker6534	A7	9.076
Marker39629	A7	9.56
Marker7976	A7	9.957
Marker11573	A7	10.172
Marker18295	A7	10.333
Marker38417	A7	10.712
Marker5531	A7	11.257
Marker14911	A7	11.485
Marker29553	A7	11.683
Marker11579	A7	11.683
Marker33668	A7	11.88
Marker22453	A7	11.953
Marker39634	A7	12.124
Marker32169	A7	12.237
Marker13614	A7	12.376
Marker11560	A7	12.501
Marker29552	A7	12.709
Marker4004	A7	12.829
Marker25452	A7	13.089
Marker29123	A7	13.227
Marker31747	A7	13.679
Marker33016	A7	13.679
Marker28459	A7	14.095
Marker42754	A7	14.095
Marker21197	A7	14.731
Marker10645	A7	15.067
Marker24127	A7	15.907
Marker38213	A7	15.907
Marker22685	A7	16.148
Marker23678	A7	16.148
Marker34947	A7	16.439
Marker23555	A7	16.548
Marker6082	A7	16.788
Marker14313	A7	17.131
Marker36416	A7	17.131
Marker17166	A7	18.587
Marker28445	A7	18.774
Marker8556	A7	19.177
Marker57989	A7	19.471
Marker18222	A7	19.661
Marker29546	A7	20.529
Marker38414	A7	20.529
Marker52140	A7	20.878
Marker62557	A7	21.224
Marker11569	A7	21.224
Marker30190	A7	21.832
Marker28737	A7	21.9
Marker18219	A7	22.342
Marker18231	A7	23.16
Marker49791	A7	23.533
Marker31139	A7	23.705
Marker43343	A7	24.37
Marker43344	A7	25.112
Marker41325	A7	25.173
Marker21178	A7	25.711
Marker41318	A7	25.711
Marker13610	A7	28.41
Marker5524	A7	28.41
Marker13617	A7	29.222
Marker28183	A7	30.016
Marker28180	A7	30.016
Marker52333	A7	31.528
Marker32695	A7	33.858
Marker5669	A7	35.1
Marker33871	A7	35.1
Marker36970	A7	37.048
Marker27316	A7	37.761
Marker42960	A7	38.144
Marker18501	A7	39.143
Marker44344	A7	40.186
Marker8748	A7	40.186
Marker33890	A7	40.981
Marker37141	A7	40.981
Marker33902	A7	41.991
Marker8738	A7	42.259
Marker2929	A7	45.137
Marker3558	A7	45.676
Marker29201	A7	45.943
Marker43472	A7	46.936
Marker17778	A7	47.084
Marker33691	A7	47.678
Marker33694	A7	47.678
Marker23390	A7	48.248
Marker72	A7	48.958
Marker48052	A7	49.954
Marker36973	A7	50.59
Marker14113	A7	51.189
Marker27793	A7	51.332
Marker10845	A7	51.371
Marker26174	A7	51.983
Marker2935	A7	52.236
Marker37540	A7	52.755
Marker26097	A7	52.972
Marker2933	A7	53.402
Marker31965	A7	53.868
Marker5127	A7	54.008
Marker61311	A7	54.762
Marker32696	A7	54.762
Marker47100	A7	55.139
Marker39982	A7	55.139
Marker15423	A7	55.205
Marker40500	A7	57.481
Marker23881	A7	58.305
Marker13973	A7	59.559
Marker16678	A7	60.661
Marker34315	A7	62.847
Marker36488	A7	63.425
Marker36503	A7	64.268
Marker29090	A7	65.21
Marker61167	A7	65.21
Marker11793	A7	65.542
Marker12438	A7	66.032
Marker31802	A7	66.063
Marker31786	A7	66.084
Marker31798	A7	66.128
Marker31790	A7	66.408
Marker5632	A7	66.708
Marker24801	A7	67.26
Marker39194	A7	67.355
Marker39524	A7	67.481
Marker13790	A7	67.917
Marker17369	A7	68.236
Marker16806	A7	68.236
Marker21863	A7	68.466
Marker4284	A7	68.901
Marker12430	A7	69.191
Marker26962	A7	69.244
Marker13780	A7	69.61
Marker8852	A7	69.945
Marker36498	A7	70.259
Marker25409	A7	70.471
Marker31383	A7	70.802
Marker33390	A7	71.029
Marker24156	A7	71.029
Marker40751	A7	71.399
Marker25425	A7	72.04
Marker40755	A7	72.469
Marker11625	A7	72.532
Marker38955	A7	72.684
Marker60196	A7	72.756
Marker25296	A7	73.072
Marker25802	A7	73.204
Marker29038	A7	73.265
Marker10467	A7	73.552
Marker28785	A7	73.552
Marker10345	A7	73.93
Marker53261	A7	74.213
Marker614	A7	74.533
Marker25413	A7	74.533
Marker36500	A7	74.677
Marker8854	A7	74.82
Marker12525	A7	75.093
Marker19247	A7	75.12
Marker19240	A7	75.205
Marker34343	A7	75.539
Marker25908	A7	75.622
Marker5617	A7	75.781
Marker34483	A7	75.781
Marker34314	A7	75.899
Marker12526	A7	75.899
Marker5614	A7	76.369
Marker13297	A7	76.378
Marker36480	A7	76.378
Marker12313	A7	76.504
Marker35218	A7	76.848
Marker11799	A7	77.003
Marker25236	A7	77.285
Marker28784	A7	77.285
Marker33450	A7	77.552
Marker26638	A7	77.961
Marker17707	A7	78.124
Marker15154	A7	78.361
Marker31354	A7	78.818
Marker18848	A7	79.033
Marker27679	A7	79.61
Marker10350	A7	79.984
Marker19123	A7	80.326
Marker2099	A7	80.971
Marker28194	A7	81.1
Marker13883	A7	81.931
Marker33443	A7	82.453
Marker21924	A7	82.453
Marker23725	A7	82.478
Marker26542	A7	84.139
Marker34804	A7	84.305
Marker34799	A7	85.321
Marker3412	A7	85.912
Marker38950	A7	89.112
Marker15137	A7	91.606
Marker25246	A7	91.835
Marker10335	A7	92.826
Marker19293	A7	94.215
Marker19385	A7	94.734
Marker19803	A7	94.734
Marker31960	A7	97.471
Marker13841	A7	106.408
Marker21881	A8	0
Marker20588	A8	6.82
Marker4124	A8	9.428
Marker42421	A8	12.42
Marker26131	A8	13.797
Marker37487	A8	17.147
Marker35464	A8	18.101
Marker28322	A8	19.419
Marker4154	A8	19.8
Marker37472	A8	20.018
Marker4167	A8	21.278
Marker40091	A8	22.09
Marker36557	A8	22.42
Marker20547	A8	23.032
Marker2993	A8	23.047
Marker26132	A8	23.665
Marker4122	A8	23.665
Marker20571	A8	24.156
Marker43853	A8	25.826
Marker26905	A8	26.037
Marker20578	A8	26.155
Marker20565	A8	26.771
Marker25393	A8	26.771
Marker3648	A8	26.771
Marker7136	A8	27.397
Marker42611	A8	27.947
Marker4146	A8	28.64
Marker43746	A8	29.384
Marker18724	A8	29.536
Marker12944	A8	29.978
Marker26310	A8	31.107
Marker9259	A8	31.742
Marker26117	A8	31.751
Marker24031	A8	32.193
Marker34276	A8	32.339
Marker2390	A8	32.63
Marker62377	A8	32.824
Marker26341	A8	32.986
Marker34307	A8	32.998
Marker12934	A8	33.221
Marker34277	A8	33.7
Marker9494	A8	34.923
Marker28216	A8	35.166
Marker2924	A8	35.926
Marker5687	A8	36.089
Marker40624	A8	36.331
Marker6564	A8	36.995
Marker31934	A8	37.603
Marker38230	A8	38.373
Marker29526	A8	38.785
Marker15823	A8	39.247
Marker25389	A8	39.727
Marker38221	A8	39.727
Marker7892	A8	40.125
Marker32845	A8	40.241
Marker19633	A8	40.311
Marker5154	A8	40.625
Marker5139	A8	40.791
Marker5758	A8	40.937
Marker32202	A8	41.322
Marker18149	A8	41.585
Marker27502	A8	41.73
Marker7881	A8	41.854
Marker4664	A8	42.367
Marker26940	A8	42.548
Marker12495	A8	42.8
Marker32842	A8	43.258
Marker1735	A8	43.328
Marker32841	A8	43.785
Marker9769	A8	44.205
Marker28988	A8	45.449
Marker6677	A8	45.712
Marker34760	A8	45.93
Marker2324	A8	45.995
Marker5169	A8	46.323
Marker60171	A8	46.479
Marker44988	A8	46.479
Marker2290	A8	46.703
Marker4428	A8	46.809
Marker21510	A8	47.296
Marker42925	A8	47.865
Marker22562	A8	48.224
Marker2503	A8	48.673
Marker30463	A8	48.926
Marker4677	A8	48.949
Marker24841	A8	49.322
Marker6529	A8	49.832
Marker32834	A8	50.382
Marker35461	A8	50.764
Marker44062	A8	51.338
Marker24873	A8	51.825
Marker268	A8	52
Marker19710	A8	52.969
Marker30924	A8	53.226
Marker59635	A8	53.226
Marker22683	A8	53.479
Marker16062	A8	53.853
Marker9105	A8	54.323
Marker25777	A8	54.927
Marker43553	A8	55.599
Marker8849	A8	55.632
Marker11483	A8	55.979
Marker25770	A8	56.043
Marker31868	A8	56.737
Marker16437	A8	57.42
Marker11530	A8	57.812
Marker30921	A8	58.121
Marker38741	A8	58.702
Marker5954	A8	58.837
Marker39847	A8	58.837
Marker38316	A8	58.964
Marker22713	A8	59.086
Marker25773	A8	59.189
Marker7696	A8	59.705
Marker11520	A8	59.705
Marker3806	A8	59.923
Marker8424	A8	60.089
Marker61260	A8	60.089
Marker8422	A8	60.089
Marker34974	A8	60.089
Marker34976	A8	60.089
Marker34594	A8	60.201
Marker33255	A8	60.582
Marker47217	A8	61.199
Marker11445	A8	61.872
Marker11494	A8	62.814
Marker10771	A8	62.826
Marker42589	A8	63.121
Marker26695	A8	63.121
Marker10770	A8	63.88
Marker3796	A8	64.757
Marker3800	A8	65.161
Marker6693	A8	65.572
Marker31627	A8	67.362
Marker31628	A8	67.362
Marker20003	A8	67.576
Marker19087	A8	68.369
Marker20486	A8	68.931
Marker42201	A8	69.744
Marker4621	A8	70.187
Marker3769	A8	70.508
Marker11522	A8	70.508
Marker8681	A8	71.018
Marker27468	A8	71.201
Marker2039	A8	71.659
Marker16842	A8	71.74
Marker17613	A8	72.152
Marker20008	A8	72.422
Marker15945	A8	72.422
Marker5847	A8	72.422
Marker27532	A8	72.422
Marker21075	A8	72.515
Marker35756	A8	72.605
Marker20002	A8	72.605
Marker21119	A8	72.851
Marker18803	A8	73.113
Marker44110	A8	73.238
Marker11454	A8	73.744
Marker42554	A8	73.976
Marker40864	A8	73.986
Marker18801	A8	73.986
Marker12591	A8	73.986
Marker43027	A8	74.572
Marker19720	A8	74.664
Marker21152	A8	75.163
Marker27146	A8	75.483
Marker20468	A8	75.72
Marker2040	A8	76.005
Marker20476	A8	76.658
Marker2035	A8	76.724
Marker27524	A8	77.655
Marker42487	A8	78.455
Marker21073	A8	79.023
Marker9125	A8	79.705
Marker28557	A8	80.276
Marker4376	A8	80.645
Marker14883	A8	82.854
Marker15955	A8	83.956
Marker28771	A8	84.282
Marker7703	A8	84.868
Marker19069	A8	85.946
Marker36696	A8	85.992
Marker27470	A8	87.302
Marker20471	A8	87.606
Marker17617	A8	88.726
Marker21071	A8	89.367
Marker17618	A8	89.523
Marker19068	A8	90.267
Marker22785	A8	91.335
Marker8607	A8	92.24
Marker21121	A8	92.89
Marker21120	A8	93.458
Marker21110	A8	93.762
Marker25227	A8	94.584
Marker5936	A8	94.738
Marker20496	A8	96.364
Marker14792	A8	97.54
Marker22875	A8	97.54
Marker5574	A8	99.355
Marker20478	A8	101.509
Marker8624	A8	102.193
Marker17612	A8	103.558
Marker23465	A8	112.59
Marker12589	A8	113.024
Marker270	A8	113.465
Marker27481	A8	118.345
Marker8801	A9	0
Marker7204	A9	5.149
Marker28384	A9	5.149
Marker42687	A9	6.04
Marker16367	A9	6.04
Marker12745	A9	6.714
Marker18101	A9	6.871
Marker8795	A9	7.56
Marker18099	A9	8.219
Marker31542	A9	8.229
Marker43293	A9	9.19
Marker41148	A9	9.369
Marker31533	A9	9.468
Marker27641	A9	10.056
Marker31563	A9	10.164
Marker26956	A9	10.552
Marker45442	A9	10.631
Marker44034	A9	10.82
Marker16167	A9	11.364
Marker7678	A9	11.47
Marker3623	A9	11.884
Marker22024	A9	12.125
Marker36439	A9	12.463
Marker26941	A9	12.554
Marker31529	A9	12.96
Marker31543	A9	13.104
Marker31547	A9	13.521
Marker8826	A9	13.594
Marker18073	A9	13.645
Marker8825	A9	13.73
Marker8811	A9	14.332
Marker44036	A9	14.332
Marker31567	A9	14.332
Marker44170	A9	14.447
Marker31560	A9	14.617
Marker7448	A9	15.067
Marker27644	A9	15.238
Marker2655	A9	15.296
Marker31537	A9	15.296
Marker8945	A9	15.716
Marker44037	A9	15.943
Marker35219	A9	16.335
Marker28131	A9	17.318
Marker18560	A9	17.729
Marker35987	A9	17.976
Marker11871	A9	18.039
Marker25850	A9	18.212
Marker25849	A9	18.212
Marker13411	A9	18.682
Marker28130	A9	18.717
Marker13150	A9	19.072
Marker22553	A9	19.673
Marker32118	A9	19.737
Marker43279	A9	20.193
Marker41985	A9	20.538
Marker5355	A9	20.556
Marker49930	A9	21.069
Marker11879	A9	21.137
Marker19547	A9	21.619
Marker32076	A9	21.919
Marker30600	A9	22.209
Marker18085	A9	22.41
Marker8508	A9	22.41
Marker7433	A9	22.587
Marker13132	A9	22.712
Marker13405	A9	23.134
Marker8479	A9	23.699
Marker19506	A9	24.771
Marker41982	A9	25.38
Marker17124	A9	25.475
Marker32980	A9	25.475
Marker8256	A9	25.665
Marker41379	A9	26.511
Marker13140	A9	27.164
Marker127	A9	27.456
Marker30763	A9	27.456
Marker8476	A9	27.916
Marker18563	A9	28.382
Marker32635	A9	28.551
Marker61140	A9	28.551
Marker30375	A9	29.162
Marker49874	A9	29.574
Marker13153	A9	29.589
Marker32651	A9	29.837
Marker25835	A9	29.837
Marker35788	A9	30.02
Marker12744	A9	30.29
Marker8318	A9	30.722
Marker16893	A9	30.797
Marker16168	A9	31.097
Marker28273	A9	31.546
Marker23397	A9	31.72
Marker31425	A9	31.793
Marker44444	A9	32.198
Marker35843	A9	32.531
Marker31296	A9	32.835
Marker2580	A9	33.063
Marker25744	A9	33.511
Marker39126	A9	33.697
Marker31400	A9	34.15
Marker7206	A9	34.413
Marker31303	A9	34.651
Marker33777	A9	34.873
Marker30380	A9	35.55
Marker25138	A9	36.437
Marker48257	A9	36.777
Marker56360	A9	36.908
Marker2591	A9	36.908
Marker32334	A9	37.628
Marker22095	A9	37.693
Marker10306	A9	37.741
Marker36134	A9	37.908
Marker41858	A9	38.293
Marker39479	A9	38.487
Marker30387	A9	38.935
Marker11414	A9	38.979
Marker8232	A9	39.59
Marker8227	A9	39.59
Marker23437	A9	40.47
Marker3745	A9	40.641
Marker8509	A9	40.94
Marker29104	A9	40.956
Marker6108	A9	41.26
Marker26997	A9	42.372
Marker35200	A9	42.734
Marker31009	A9	43.701
Marker33425	A9	43.901
Marker35682	A9	44.619
Marker41779	A9	45.172
Marker22098	A9	45.238
Marker6868	A9	45.475
Marker8241	A9	45.837
Marker30815	A9	46.8
Marker16655	A9	47.215
Marker36147	A9	47.215
Marker128	A9	47.737
Marker16656	A9	47.737
Marker28383	A9	49.189
Marker30273	A9	50.946
Marker15856	A9	50.946
Marker2782	A9	51.416
Marker13726	A9	51.891
Marker3242	A9	53.031
Marker46011	A9	53.299
Marker31073	A9	53.299
Marker21751	A9	53.892
Marker62692	A9	54.57
Marker29174	A9	54.793
Marker21733	A9	54.793
Marker24926	A9	55.372
Marker26240	A9	55.372
Marker29494	A9	55.733
Marker17569	A9	56.241
Marker35380	A9	56.43
Marker26123	A9	56.43
Marker36283	A9	56.793
Marker45545	A9	56.908
Marker33946	A9	56.908
Marker13004	A9	57.465
Marker41519	A9	57.813
Marker2280	A9	57.86
Marker31016	A9	57.889
Marker4519	A9	58.281
Marker32829	A9	58.595
Marker30817	A9	58.713
Marker30469	A9	58.968
Marker34034	A9	59.167
Marker29887	A9	59.306
Marker36298	A9	59.544
Marker25114	A9	59.544
Marker14661	A9	59.721
Marker59095	A9	59.812
Marker29779	A9	59.854
Marker38530	A9	60.025
Marker36128	A9	60.254
Marker24927	A9	60.254
Marker30816	A9	60.457
Marker25107	A9	60.622
Marker36149	A9	60.622
Marker24904	A9	60.772
Marker32805	A9	60.815
Marker29182	A9	60.955
Marker10052	A9	61.124
Marker33343	A9	61.372
Marker8335	A9	61.416
Marker9811	A9	61.472
Marker27543	A9	61.751
Marker34631	A9	61.856
Marker3310	A9	62.214
Marker15900	A9	62.214
Marker31957	A9	62.357
Marker30834	A9	62.468
Marker3226	A9	62.94
Marker29885	A9	63.201
Marker25117	A9	63.587
Marker23424	A9	63.923
Marker7580	A9	64.29
Marker2788	A9	64.646
Marker32018	A9	64.646
Marker25679	A9	64.702
Marker21730	A9	64.753
Marker4114	A9	66.18
Marker36288	A9	66.49
Marker56623	A9	66.835
Marker29197	A9	67.606
Marker8772	A9	68.16
Marker33357	A9	68.331
Marker33947	A9	68.418
Marker34673	A9	68.785
Marker57888	A9	68.865
Marker21844	A9	69.614
Marker13767	A9	70.234
Marker38529	A9	70.3
Marker24903	A9	70.902
Marker11610	A9	71.497
Marker36305	A9	72.187
Marker25110	A9	72.246
Marker18672	A9	72.545
Marker1857	A9	73.707
Marker11410	A9	74.263
Marker21830	A9	74.87
Marker41799	A9	78.042
Marker1853	A9	78.967
Marker2593	A9	80.334
Marker30280	A9	94.646
Marker352	A10	0
Marker19158	A10	0.808
Marker485	A10	1.585
Marker439	A10	1.585
Marker38061	A10	2.676
Marker10575	A10	2.676
Marker203	A10	3.12
Marker8141	A10	7.801
Marker28020	A10	10.736
Marker42806	A10	12.895
Marker11970	A10	15.015
Marker25738	A10	15.015
Marker6211	A10	15.015
Marker433	A10	16.175
Marker4698	A10	16.304
Marker42802	A10	16.592
Marker23414	A10	17.014
Marker12665	A10	17.014
Marker25349	A10	17.305
Marker4845	A10	18.113
Marker130	A10	18.448
Marker59792	A10	19.111
Marker33744	A10	19.494
Marker30427	A10	20.209
Marker35558	A10	20.5
Marker33492	A10	20.73
Marker7971	A10	21.923
Marker33490	A10	22.226
Marker14201	A10	23.151
Marker4709	A10	24.055
Marker32434	A10	24.921
Marker25875	A10	25.096
Marker2611	A10	25.803
Marker32424	A10	26.27
Marker31030	A10	26.711
Marker32420	A10	27.308
Marker23418	A10	27.373
Marker32425	A10	27.996
Marker32435	A10	28.167
Marker21042	A10	28.562
Marker33932	A10	29.06
Marker7765	A10	29.568
Marker6722	A10	29.568
Marker12435	A10	29.988
Marker3356	A10	30.795
Marker7480	A10	30.979
Marker23421	A10	30.979
Marker31039	A10	32.207
Marker42813	A10	32.323
Marker11939	A10	33.669
Marker30977	A10	34.937
Marker32604	A10	35.275
Marker43264	A10	35.333
Marker32537	A10	36.401
Marker10311	A10	37.59
Marker43078	A10	37.827
Marker34592	A10	38.16
Marker16129	A10	38.632
Marker40470	A10	38.778
Marker43267	A10	39.332
Marker30982	A10	42.615
Marker32436	A10	43.71
Marker22541	A10	46.378
Marker31041	A10	48.953
Marker302	A10	54.112
Marker535	A10	54.112
Marker22609	A10	54.346
Marker26062	A10	55.184
Marker34542	A10	55.184
Marker23314	A10	55.184
Marker41661	A10	55.184
Marker31512	A10	55.184
Marker14828	A10	55.184
Marker10724	A10	56.367
Marker703	A10	58.483
Marker33539	A10	58.571
Marker12878	A10	59.677
Marker8139	A10	59.937
Marker28235	A10	60.003
Marker6920	A10	60.003
Marker15528	A10	60.003
Marker28234	A10	60.003
Marker4471	A10	62.478
Marker2868	A10	62.687
Marker10542	A10	63.734
Marker35771	A10	66.011
Marker16915	A10	66.554
Marker38507	A10	66.554
Marker36678	A10	67.214
Marker6768	A10	67.214
Marker46532	A10	68.273
Marker6824	A10	69.678
Marker44571	A10	70.49
Marker36919	A10	70.692
Marker27657	A10	73.307
Marker28960	A10	73.871
Marker19772	A10	74.164
Marker36935	A10	75.48
Marker22796	A10	75.888
Marker36917	A10	76.184
Marker15497	A10	77.621
Marker12660	A10	79.392
Marker12644	A10	79.866
Marker12661	A10	80.367
Marker12655	A10	80.444
Marker12662	A10	81.074
Marker5723	A10	81.583
Marker4496	A10	81.583
Marker22766	A10	83.207
Marker17442	A10	84.39
Marker31906	A10	86.068
Marker44366	A10	86.423
Marker16002	A10	87.199
Marker11719	A10	87.875
Marker43411	A10	88.466
Marker35090	A10	90.372
Marker13057	A10	90.372
Marker13392	A10	90.372
Marker21322	A10	90.372
Marker1986	A10	93.642
Marker26506	A10	101.989
