# Supplementary material for: A High-Density SNP Genetic Linkage Map and QTL Analysis of Growth-Related Traits in a Hybrid Family of Oysters (Crassostrea gigas × Crassostrea angulata) Using Genotyping-by-Sequencing
Source: G3 (Bethesda). 2016 Mar 17;6(5):1417–26. doi: 10.1534/g3.116.026971 (PMC4856092; doi:10.1534/g3.116.026971)
Supplement: Supplemental Material [file supp_g3.116.026971_TableS8.xlsx]

## Sheet: Sheet1
Table S8. The comparison of genetic distances and expected recombination counts before and after the imputation for the sex-specific maps, by linkage group.
Female map					Male map
	Size (cM)		Expected recombination counts			Size (cM)		Expected recombination counts
Linkage group	Before imputation	After imputation	Before imputation	After imputation	Linkage group	Before imputation	After imputation	Before imputation	After imputation
F1	1565.5	572.6	12.8	5.2	M1	906	642.9	7.8	5.7
F2	869.9	358.8	7.4	3.2	M2	478	188.1	4.3	1.7
F3.1	520.8	136.5	4.5	1.3	M3.1	269.8	101.4	2.4	1
F3.2	180.3	70.6	1.6	0.7	M3.2	66.7	26.5	0.6	0.3
F4	993.7	327.1	7.8	3	M4	174.7	81.2	1.6	0.8
F5	782.5	311.9	6.5	2.8	M5	404.2	122	3.3	1.2
F6	821.2	280.7	7	2.6	M6.1	65.9	38.2	0.6	0.3
F7	1361.5	390.5	11.2	3.7	M6.2	54.7	34.5	0.5	0.3
F8.1	574.7	213.5	4.8	2	M7	572.6	216	5	2
F8.2	400.7	142.3	3.5	1.3	M8	550.4	223.1	4.8	2.1
F9	1035.6	392.6	8.8	3.5	M9	708.5	262.5	6.2	2.5
F10	525.4	175.9	4.4	1.6	M10	411.1	269.5	3.4	1.9
