# Supplementary material for: A High-Density SNP Genetic Linkage Map and QTL Analysis of Growth-Related Traits in a Hybrid Family of Oysters (Crassostrea gigas × Crassostrea angulata) Using Genotyping-by-Sequencing
Source: G3 (Bethesda). 2016 Mar 17;6(5):1417–26. doi: 10.1534/g3.116.026971 (PMC4856092; doi:10.1534/g3.116.026971)
Supplement: Supplemental Material [file supp_g3.116.026971_TableS9.xlsx]

## Sheet: Sheet1
Table S9. Length and number of markers for the sex-specific maps, by linkage group, and their correspondence to the linkage groups of the sex-average map.
Female map			Sex-average map			Male map
Linkage group	Number of markers	Size (cM)	Linkage group	Number of markers	Size (cM)	Linkage group	Number of markers	Size (cM)
F1	83	121.4	A1	178	134.3	M1	80	101.6
F2	131	112.12	A2	189	102.5	M2	82	88.4
F3.1	76	54.2	A3	152	111	M3.1	41	41.9
F3.2	30	35.7				M3.2	12	19.5
F4	93	109.3	A4	118	114.7	M4	33	45.6
F5	95	98.5	A5	147	97.9	M5	62	69.6
F6	109	101	A6	143	102.4	M6.1	25	37.2
						M6.2	16	33.3
F7	144	116	A7	215	106.4	M7	86	74.7
F8.1	76	69.9	A8	206	118.4	M8	91	80.6
F8.2	54	49.3
F9	139	70.6	A9	225	94.7	M9	108	66
F10	72	96.5	A10	121	102	M10	53	86.4
Total	1102	1034.6		1694	1084.3		689	744.8
