# Supplementary material for: A High-Density SNP Genetic Linkage Map and QTL Analysis of Growth-Related Traits in a Hybrid Family of Oysters (Crassostrea gigas × Crassostrea angulata) Using Genotyping-by-Sequencing
Source: G3 (Bethesda). 2016 Mar 17;6(5):1417–26. doi: 10.1534/g3.116.026971 (PMC4856092; doi:10.1534/g3.116.026971)
Supplement: Supplemental Material [file supp_g3.116.026971_TableS10.xlsx]

## Sheet: Sheet1
Table S10. Proportion of distorted markers for each linkage group of the sex-average map of a hybridized family of Crassostrea gigas and C. angulata.
Linkage group	Total markers number	Distorted markers number	Proportion of distorted markers
A1	178	72	0.4045
A2	189	107	0.5661
A3	152	82	0.5395
A4	118	57	0.4831
A5	147	108	0.7347
A6	143	99	0.6923
A7	215	76	0.3535
A8	206	159	0.7718
A9	225	61	0.2711
A10	121	15	0.124
Total	1694	836	0.49
