# Supplementary material for: A High-Density SNP Genetic Linkage Map and QTL Analysis of Growth-Related Traits in a Hybrid Family of Oysters (Crassostrea gigas × Crassostrea angulata) Using Genotyping-by-Sequencing
Source: G3 (Bethesda). 2016 Mar 17;6(5):1417–26. doi: 10.1534/g3.116.026971 (PMC4856092; doi:10.1534/g3.116.026971)
Supplement: Supplemental Material [file supp_g3.116.026971_TableS11.xlsx]

## Sheet: Sheet1
Table S11. Annotated growth-related genes determined by QTL analysis of oysters.
Trait	QTL	Gene ID	Gene symbol
Shell height	qGRT-3	CGI_10025221	kiaa0317
	qGRT-4	CGI_10002407	znf839
	qGRT-4	CGI_10006343	fbp1
	qGRT-4	CGI_10006676	neo1
	qGRT-4	CGI_10011629	cd22
	qGRT-4	CGI_10012666	avil
	qGRT-4	CGI_10016312	strap
	qGRT-4	CGI_10027835	tekt1
	qGRT-5	CGI_10003960	svep1
	qGRT-5	CGI_10011134	fbp1
	qGRT-5	CGI_10021699	fmn2
	qGRT-6	CGI_10005875	agl
	qGRT-6	CGI_10026802	megf8
	qGRT-25	CGI_10021960	rab3
Shell length	qGRT-8	CGI_10010235	hs3st3b1
	qGRT-8	CGI_10017216	immp2l
	qGRT-9	CGI_10012008	col6a5
	qGRT-9	CGI_10015223	chsy3
	qGRT-9	CGI_10016579	angpt1
	qGRT-9	CGI_10021231	fam49b
	qGRT-9	CGI_10021854	prkg1
	qGRT-9	CGI_10025937	txndc12
	qGRT-9	CGI_10026242	caprin2
Shell width	qGRT-12	CGI_10010914	grk1
	qGRT-13	CGI_10018436	tdrd7
	qGRT-15	CGI_10013554	r290
	qGRT-15	CGI_10020891	polg
	qGRT-17	CGI_10015616	dusp6
	qGRT-17	CGI_10026923	tbata
	qGRT-19	CGI_10014457	lppr5
	qGRT-20	CGI_10026581	trim2
Soft tissue weight	qGRT-21	CGI_10008854	psmf1
	qGRT-21	CGI_10017414	trim2
	qGRT-21	CGI_10020462	mob2b
	qGRT-22	CGI_10008472	specc1l
	qGRT-22	CGI_10010244	dync1i2
	qGRT-24	CGI_10010647	hspa4
	qGRT-25	CGI_10021960	rab3
	qGRT-26	CGI_10008058	hta1
